# Supplementary material for: De novo sequencing and analysis of the transcriptome during the browning of fresh-cut Luffa cylindrica 'Fusi-3' fruits
Source: PLoS One. 2017 Nov 16;12(11):e0187117. doi: 10.1371/journal.pone.0187117 (PMC5690621; doi:10.1371/journal.pone.0187117)
Supplement: S1 Table — (XLSX) [file pone.0187117.s001.xlsx]

## Sheet: Sheet1
geneID	geneLength	unique-mapped-reads(67628923)	RPKM	Nr-ID	Nr-Score	Nr-Evalue	Nr-annotation	Swissprot-ID	Swissprot-Score	Swissprot-Evalue	Swissprot-annotation	KOG-Protein-or-Domain	KOG-Score	KOG-Evalue	KOG-ID	KOG-Function-Description	KO-ID	KEGG-Evalue	KEGG-Score	KEGG-Gene	Pathway	GO-BiologicalProcess	GO-MolecularFunction	GO-CellularComponent	Pfam-alignment_start	Pfam-alignment_end	Pfam-hmm_name	Pfam-type	Pfam-bit_core	Pfam-E_value	SMART_Domain_Start	SMART_Domain_End	SMART_Domain	SMART-Evalue	SMART-Score	TF_Family	PRGID	PRGdb-Name	PRGdb-Type	PRGdb-Species	PRGdb-Class	PRGdb-Evalue	PRGdb-Score
Unigene0000001	456	342	11.0899	gi|700192218|gb|KGN47422.1|	104	6e-27	hypothetical protein Csa_6G318690 [Cucumis sativus]	--	--	--	--	--	--	--	--	--	--	--	--	--	--	--	-	-	-	--	--	--	--	--	--	--	--	--	--	--	--	--	--	--	--	--	--	--
Unigene0000002	305	19	0.9211	--	--	--	--	--	--	--	--	--	--	--	--	--	--	--	--	--	--	--	-	-	-	--	--	--	--	--	--	--	--	--	--	--	--	--	--	--	--	--	--	--
Unigene0000003	302	23	1.1261	--	--	--	--	--	--	--	--	--	--	--	--	--	--	--	--	--	--	--	-	-	-	--	--	--	--	--	--	--	--	--	--	--	--	--	--	--	--	--	--	--
Unigene0000004	416	0	0	gi|659106517|ref|XP_008453363.1|	95.1	3e-23	PREDICTED: CLAVATA3/ESR (CLE)-related protein 13 [Cucumis melo]	sp|Q29PU4|CLE12_ARATH	61.2	2e-11	CLAVATA3/ESR (CLE)-related protein 12 OS=Arabidopsis thaliana GN=CLE12 PE=2 SV=1	--	--	--	--	--	--	--	--	--	--	--	GO:0044699//single-organism process	-	GO:0005576//extracellular region	--	--	--	--	--	--	--	--	--	--	--	--	--	--	--	--	--	--	--
Unigene0000005	566	59	1.5414	gi|659106517|ref|XP_008453363.1|	94.7	2e-22	PREDICTED: CLAVATA3/ESR (CLE)-related protein 13 [Cucumis melo]	sp|Q29PU4|CLE12_ARATH	61.2	4e-11	CLAVATA3/ESR (CLE)-related protein 12 OS=Arabidopsis thaliana GN=CLE12 PE=2 SV=1	--	--	--	--	--	--	--	--	--	--	--	GO:0044699//single-organism process	-	GO:0005576//extracellular region	--	--	--	--	--	--	--	--	--	--	--	--	--	--	--	--	--	--	--
Unigene0000006	212	9	0.6277	--	--	--	--	--	--	--	--	--	--	--	--	--	--	--	--	--	--	--	-	-	-	--	--	--	--	--	--	--	--	--	--	--	--	--	--	--	--	--	--	--
Unigene0000007	308	17	0.8161	gi|659132601|ref|XP_008466286.1|	217	3e-65	PREDICTED: U-box domain-containing protein 52 isoform X2 [Cucumis melo]	sp|Q9SW11|PUB35_ARATH	157	2e-44	U-box domain-containing protein 35 OS=Arabidopsis thaliana GN=PUB35 PE=1 SV=2	At5g12000	192	6e-58	KOG1187	Serine/threonine protein kinase	--	--	--	--	--	--	GO:0044260//cellular macromolecule metabolic process;GO:0006793//phosphorus metabolic process;GO:0036211//protein modification process;GO:0043412//macromolecule modification;GO:0009987//cellular process;GO:0006796//phosphate-containing compound metabolic process;GO:0050896//response to stimulus;GO:0044238//primary metabolic process;GO:0044237//cellular metabolic process;GO:0008152//metabolic proc…	GO:0097367//carbohydrate derivative binding;GO:0016773//phosphotransferase activity, alcohol group as acceptor;GO:1901363//heterocyclic compound binding;GO:0003824//catalytic activity;GO:0016740//transferase activity;GO:0016772//transferase activity, transferring phosphorus-containing groups;GO:0001883//purine nucleoside binding;GO:0032550//purine ribonucleoside binding;GO:0004672//protein kinase…	-	1	102	Pkinase	Domain	69.6	2e-19	1|1	102|102	S_TKc|TyrKc	3.4e-17|5.3e-17	59.4|58.2	--	PRGWK00000178	MELO3C011467	Contributed_R-Genes	Cucumis melo	RLK	1e-61	201
Unigene0000008	323	52	2.3805	--	--	--	--	--	--	--	--	--	--	--	--	--	--	--	--	--	--	--	-	-	-	--	--	--	--	--	--	--	--	--	--	--	--	--	--	--	--	--	--	--
Unigene0000009	224	20	1.3202	--	--	--	--	--	--	--	--	--	--	--	--	--	--	--	--	--	--	--	-	-	-	--	--	--	--	--	--	--	--	--	--	--	--	--	--	--	--	--	--	--
Unigene0000010	220	0	0	--	--	--	--	--	--	--	--	--	--	--	--	--	--	--	--	--	--	--	-	-	-	--	--	--	--	--	--	--	--	--	--	--	--	--	--	--	--	--	--	--
Unigene0000011	260	2	0.1137	--	--	--	--	--	--	--	--	--	--	--	--	--	--	--	--	--	--	--	-	-	-	--	--	--	--	--	--	--	--	--	--	--	--	--	--	--	--	--	--	--
Unigene0000012	1430	204	2.1094	gi|357475987|ref|XP_003608279.1|	505	2e-172	Endoglucanase [Medicago truncatula]	sp|P54583|GUN1_ACIC1	67.4	1e-10	Endoglucanase E1 OS=Acidothermus cellulolyticus (strain ATCC 43068 / 11B) GN=Acel_0614 PE=1 SV=1	--	--	--	--	--	--	--	--	--	--	--	GO:0044238//primary metabolic process;GO:0008152//metabolic process	GO:0003824//catalytic activity;GO:0016798//hydrolase activity, acting on glycosyl bonds;GO:0016787//hydrolase activity	-	10	294	Cellulase	Domain	83.2	1.6e-23	--	--	--	--	--	--	PRGDB00169460	Medtr7g012080.1	Putative_R-Genes,_predicted_from_Pythozome	Medicago truncatula	NL	6e-35	138
Unigene0000013	223	18	1.1935	--	--	--	--	--	--	--	--	--	--	--	--	--	--	--	--	--	--	--	-	-	-	--	--	--	--	--	--	--	--	--	--	--	--	--	--	--	--	--	--	--
Unigene0000014	215	11	0.7565	--	--	--	--	--	--	--	--	--	--	--	--	--	--	--	--	--	--	--	-	-	-	--	--	--	--	--	--	--	--	--	--	--	--	--	--	--	--	--	--	--
Unigene0000015	223	15	0.9946	--	--	--	--	--	--	--	--	--	--	--	--	--	--	--	--	--	--	--	-	-	-	--	--	--	--	--	--	--	--	--	--	--	--	--	--	--	--	--	--	--
Unigene0000016	300	12	0.5915	gi|307136175|gb|ADN34016.1|	82.8	6e-17	ty3-gypsy retrotransposon protein [Cucumis melo subsp. melo]	--	--	--	--	--	--	--	--	--	--	--	--	--	--	--	GO:0006355//regulation of transcription, DNA-templated;GO:0031323//regulation of cellular metabolic process;GO:2000112//regulation of cellular macromolecule biosynthetic process;GO:0051171//regulation of nitrogen compound metabolic process;GO:0019219//regulation of nucleobase-containing compound metabolic process;GO:0065007//biological regulation;GO:0050789//regulation of biological process;GO:00…	-	GO:0005623//cell;GO:0043226//organelle;GO:0005622//intracellular;GO:0043229//intracellular organelle;GO:0044464//cell part;GO:0044424//intracellular part;GO:0043231//intracellular membrane-bounded organelle;GO:0043227//membrane-bounded organelle	--	--	--	--	--	--	--	--	--	--	--	--	--	--	--	--	--	--	--
Unigene0000017	1571	32	0.3012	gi|728812258|gb|KHG00736.1|	352	7e-117	Glycerol kinase [Gossypium arboreum]	--	--	--	--	At4g38220	294	6e-96	KOG2275	Aminoacylase ACY1 and related metalloexopeptidases	--	--	--	--	--	--	-	-	GO:0044424//intracellular part;GO:0005622//intracellular;GO:0043231//intracellular membrane-bounded organelle;GO:0009536//plastid;GO:0044444//cytoplasmic part;GO:0043226//organelle;GO:0043229//intracellular organelle;GO:0005737//cytoplasm;GO:0005623//cell;GO:0044464//cell part;GO:0043227//membrane-bounded organelle	--	--	--	--	--	--	--	--	--	--	--	--	--	--	--	--	--	--	--
Unigene0000018	1519	285	2.7743	gi|728812258|gb|KHG00736.1|	441	2e-149	Glycerol kinase [Gossypium arboreum]	--	--	--	--	At4g38220	357	3e-113	KOG2275	Aminoacylase ACY1 and related metalloexopeptidases	--	--	--	--	--	--	-	-	GO:0044464//cell part;GO:0043229//intracellular organelle;GO:0005737//cytoplasm;GO:0044444//cytoplasmic part;GO:0005622//intracellular;GO:0044424//intracellular part;GO:0043227//membrane-bounded organelle;GO:0009536//plastid;GO:0005623//cell;GO:0043226//organelle;GO:0043231//intracellular membrane-bounded organelle	--	--	--	--	--	--	--	--	--	--	--	--	--	--	--	--	--	--	--
Unigene0000019	515	0	0	gi|728812258|gb|KHG00736.1|	94.4	5e-21	Glycerol kinase [Gossypium arboreum]	--	--	--	--	At4g38220	77.8	4e-16	KOG2275	Aminoacylase ACY1 and related metalloexopeptidases	--	--	--	--	--	--	-	-	GO:0009536//plastid;GO:0005623//cell;GO:0005622//intracellular;GO:0044464//cell part;GO:0043227//membrane-bounded organelle;GO:0043226//organelle;GO:0043229//intracellular organelle;GO:0044424//intracellular part;GO:0044444//cytoplasmic part;GO:0043231//intracellular membrane-bounded organelle;GO:0005737//cytoplasm	--	--	--	--	--	--	--	--	--	--	--	--	--	--	--	--	--	--	--
Unigene0000020	441	33	1.1065	--	--	--	--	--	--	--	--	--	--	--	--	--	--	--	--	--	--	--	-	-	-	--	--	--	--	--	--	--	--	--	--	--	--	--	--	--	--	--	--	--
Unigene0000021	351	44	1.8536	--	--	--	--	--	--	--	--	--	--	--	--	--	--	--	--	--	--	--	-	-	-	--	--	--	--	--	--	--	--	--	--	--	--	--	--	--	--	--	--	--
Unigene0000022	352	69	2.8985	--	--	--	--	--	--	--	--	--	--	--	--	--	--	--	--	--	--	--	-	-	-	--	--	--	--	--	--	--	--	--	--	--	--	--	--	--	--	--	--	--
Unigene0000023	393	21	0.7901	gi|778728957|ref|XP_011659507.1|	100	3e-34	PREDICTED: ethylene-responsive transcription factor ERF003-like [Cucumis sativus]	sp|Q94AW5|ERF03_ARATH	92.4	2e-22	Ethylene-responsive transcription factor ERF003 OS=Arabidopsis thaliana GN=ERF003 PE=2 SV=1	--	--	--	--	--	--	--	--	--	--	--	GO:0044237//cellular metabolic process;GO:0065007//biological regulation;GO:0050789//regulation of biological process;GO:0044249//cellular biosynthetic process;GO:0008152//metabolic process;GO:0009987//cellular process;GO:0034645//cellular macromolecule biosynthetic process;GO:1901576//organic substance biosynthetic process;GO:0044260//cellular macromolecule metabolic process;GO:0009058//biosynth…	GO:0005488//binding;GO:1901363//heterocyclic compound binding;GO:0097159//organic cyclic compound binding;GO:0003676//nucleic acid binding;GO:0001071//nucleic acid binding transcription factor activity	GO:0043229//intracellular organelle;GO:0005623//cell;GO:0043227//membrane-bounded organelle;GO:0005622//intracellular;GO:0043231//intracellular membrane-bounded organelle;GO:0044464//cell part;GO:0043226//organelle;GO:0044424//intracellular part	--	--	--	--	--	--	1	34	AP2	2.1e-17	60.6	--	--	--	--	--	--	--	--
Unigene0000024	228	13	0.8431	--	--	--	--	--	--	--	--	--	--	--	--	--	--	--	--	--	--	--	-	-	-	--	--	--	--	--	--	--	--	--	--	--	--	--	--	--	--	--	--	--
Unigene0000025	236	2	0.1253	gi|164449268|gb|ABY56097.1|	56.2	1e-09	unknown [Cucumis melo]	--	--	--	--	--	--	--	--	--	--	--	--	--	--	--	-	-	-	--	--	--	--	--	--	--	--	--	--	--	--	--	--	--	--	--	--	--
Unigene0000026	206	0	0	gi|164449268|gb|ABY56097.1|	56.2	1e-09	unknown [Cucumis melo]	--	--	--	--	--	--	--	--	--	--	--	--	--	--	--	-	-	-	--	--	--	--	--	--	--	--	--	--	--	--	--	--	--	--	--	--	--
Unigene0000027	366	34	1.3736	gi|657372853|gb|KEH18623.1|	131	4e-35	serpin-like protein [Medicago truncatula]	sp|Q40066|SPZX_HORVU	111	1e-28	Serpin-ZX OS=Hordeum vulgare GN=PAZX PE=1 SV=1	At2g25240	108	2e-28	KOG2392	Serpin	K13963//serpin B	5e-35	130	cmo:103493509	--	-	-	-	1	117	Serpin	Domain	98.1	5.1e-28	1	117	SERPIN	2.6e-27	92.5	--	--	--	--	--	--	--	--
Unigene0000028	340	25	1.0872	gi|449446961|ref|XP_004141238.1|	159	2e-45	PREDICTED: serpin-ZX-like [Cucumis sativus]	sp|Q9SIR9|SPZ10_ARATH	137	5e-38	Serpin-Z10 OS=Arabidopsis thaliana GN=At2g25240 PE=2 SV=1	At2g25240	137	7e-39	KOG2392	Serpin	K13963//serpin B	9e-46	159	csv:101209771	--	-	-	-	3	112	Serpin	Domain	85.6	3.2e-24	2	112	SERPIN	1.1e-22	77.2	--	--	--	--	--	--	--	--
Unigene0000029	241	7	0.4295	--	--	--	--	--	--	--	--	--	--	--	--	--	--	--	--	--	--	--	-	-	-	--	--	--	--	--	--	--	--	--	--	--	--	--	--	--	--	--	--	--
Unigene0000030	548	28	0.7555	--	--	--	--	--	--	--	--	--	--	--	--	--	--	--	--	--	--	--	-	-	-	--	--	--	--	--	--	--	--	--	--	--	--	--	--	--	--	--	--	--
Unigene0000031	471	7	0.2198	--	--	--	--	--	--	--	--	--	--	--	--	--	--	--	--	--	--	--	-	-	-	--	--	--	--	--	--	--	--	--	--	--	--	--	--	--	--	--	--	--
Unigene0000032	315	30	1.4082	--	--	--	--	--	--	--	--	--	--	--	--	--	--	--	--	--	--	--	-	-	-	--	--	--	--	--	--	--	--	--	--	--	--	--	--	--	--	--	--	--
Unigene0000033	271	18	0.9821	gi|359491845|ref|XP_002272677.2|	120	2e-31	PREDICTED: 12-oxophytodienoate reductase 2-like [Vitis vinifera]	sp|Q8GYB8|OPR2_ARATH	103	3e-26	12-oxophytodienoate reductase 2 OS=Arabidopsis thaliana GN=OPR2 PE=1 SV=2	At1g76690	103	4e-27	KOG0134	NADH:flavin oxidoreductase/12-oxophytodienoate reductase	K05894//12-oxophytodienoic acid reductase [EC:1.3.1.42]	1e-33	125	cam:101498570	ko00592//alpha-Linolenic acid metabolism//Lipid metabolism//Metabolism	GO:0044699//single-organism process;GO:0044710//single-organism metabolic process;GO:0008152//metabolic process	GO:0000166//nucleotide binding;GO:0016627//oxidoreductase activity, acting on the CH-CH group of donors;GO:1901363//heterocyclic compound binding;GO:0003824//catalytic activity;GO:0005488//binding;GO:0016628//oxidoreductase activity, acting on the CH-CH group of donors, NAD or NADP as acceptor;GO:0016491//oxidoreductase activity;GO:0097367//carbohydrate derivative binding;GO:0036094//small molecu…	-	17	81	Oxidored_FMN	Domain	31.7	6.7e-08	--	--	--	--	--	--	--	--	--	--	--	--	--
Unigene0000034	208	7	0.4976	gi|124360392|gb|ABN08405.1|	90.1	1e-20	Peptidase aspartic, active site [Medicago truncatula]	sp|Q99315|YG31B_YEAST	55.8	5e-09	Transposon Ty3-G Gag-Pol polyprotein OS=Saccharomyces cerevisiae (strain ATCC 204508 / S288c) GN=TY3B-G PE=1 SV=3	At1g35370_2	71.6	3e-15	KOG0017	FOG: Transposon-encoded proteins with TYA, reverse transcriptase, integrase domains in various combinations	--	--	--	--	--	--	-	GO:0005488//binding	-	--	--	--	--	--	--	--	--	--	--	--	--	--	--	--	--	--	--	--
Unigene0000035	2917	29	0.147	gi|659094460|ref|XP_008448072.1|	1589	0	PREDICTED: vacuolar proton ATPase a3 [Cucumis melo]	sp|Q8W4S4|VHAA3_ARATH	1320	0	V-type proton ATPase subunit a3 OS=Arabidopsis thaliana GN=VHA-a3 PE=1 SV=1	At2g21410	1303	0	KOG2189	Vacuolar H+-ATPase V0 sector, subunit a	K02154//V-type H+-transporting ATPase subunit a	0	1589	cmo:103490358	ko00190//Oxidative phosphorylation//Energy metabolism//Metabolism;ko04145//Phagosome//Transport and catabolism//Cellular Processes	GO:1902600//hydrogen ion transmembrane transport;GO:0044765//single-organism transport;GO:0015672//monovalent inorganic cation transport;GO:0098660//inorganic ion transmembrane transport;GO:0006818//hydrogen transport;GO:0051234//establishment of localization;GO:0015988//energy coupled proton transmembrane transport, against electrochemical gradient;GO:0006811//ion transport;GO:0098662//inorganic…	GO:0003824//catalytic activity;GO:0022892//substrate-specific transporter activity;GO:0008324//cation transmembrane transporter activity;GO:0015075//ion transmembrane transporter activity;GO:0022857//transmembrane transporter activity;GO:0022891//substrate-specific transmembrane transporter activity;GO:0015077//monovalent inorganic cation transmembrane transporter activity;GO:0005215//transporter…	GO:0044425//membrane part;GO:0043234//protein complex;GO:0016020//membrane;GO:0016469//proton-transporting two-sector ATPase complex;GO:0032991//macromolecular complex;GO:0033177//proton-transporting two-sector ATPase complex, proton-transporting domain;GO:0033176//proton-transporting V-type ATPase complex;GO:0031224//intrinsic component of membrane;GO:0033179//proton-transporting V-type ATPase, …	37	810	V_ATPase_I	Family	814.1	7.8e-245	--	--	--	--	--	--	--	--	--	--	--	--	--
Unigene0000036	2918	0	0	gi|659094460|ref|XP_008448072.1|	1589	0	PREDICTED: vacuolar proton ATPase a3 [Cucumis melo]	sp|Q8W4S4|VHAA3_ARATH	1320	0	V-type proton ATPase subunit a3 OS=Arabidopsis thaliana GN=VHA-a3 PE=1 SV=1	At2g21410	1303	0	KOG2189	Vacuolar H+-ATPase V0 sector, subunit a	K02154//V-type H+-transporting ATPase subunit a	0	1589	cmo:103490358	ko00190//Oxidative phosphorylation//Energy metabolism//Metabolism;ko04145//Phagosome//Transport and catabolism//Cellular Processes	GO:0015988//energy coupled proton transmembrane transport, against electrochemical gradient;GO:1902600//hydrogen ion transmembrane transport;GO:1902578//single-organism localization;GO:0098662//inorganic cation transmembrane transport;GO:0006818//hydrogen transport;GO:0015672//monovalent inorganic cation transport;GO:0006810//transport;GO:0098655//cation transmembrane transport;GO:0006812//cation…	GO:0022891//substrate-specific transmembrane transporter activity;GO:0008324//cation transmembrane transporter activity;GO:0022890//inorganic cation transmembrane transporter activity;GO:0022857//transmembrane transporter activity;GO:0003824//catalytic activity;GO:0015075//ion transmembrane transporter activity;GO:0005215//transporter activity;GO:0022892//substrate-specific transporter activity;G…	GO:0016020//membrane;GO:0016469//proton-transporting two-sector ATPase complex;GO:0033177//proton-transporting two-sector ATPase complex, proton-transporting domain;GO:0033179//proton-transporting V-type ATPase, V0 domain;GO:0044425//membrane part;GO:0031224//intrinsic component of membrane;GO:0032991//macromolecular complex;GO:0043234//protein complex;GO:0033176//proton-transporting V-type ATPas…	37	810	V_ATPase_I	Family	814.1	7.8e-245	--	--	--	--	--	--	--	--	--	--	--	--	--
Unigene0000037	1025	411	5.9291	--	--	--	--	--	--	--	--	--	--	--	--	--	--	--	--	--	--	--	-	-	-	--	--	--	--	--	--	--	--	--	--	--	--	--	--	--	--	--	--	--
Unigene0000038	320	15	0.6931	--	--	--	--	--	--	--	--	--	--	--	--	--	--	--	--	--	--	--	-	-	-	--	--	--	--	--	--	--	--	--	--	--	--	--	--	--	--	--	--	--
Unigene0000039	479	15128	466.996	--	--	--	--	--	--	--	--	--	--	--	--	--	--	--	--	--	--	--	-	-	-	--	--	--	--	--	--	--	--	--	--	--	--	--	--	--	--	--	--	--
Unigene0000040	230	17	1.0929	--	--	--	--	--	--	--	--	--	--	--	--	--	--	--	--	--	--	--	-	-	-	--	--	--	--	--	--	--	--	--	--	--	--	--	--	--	--	--	--	--
Unigene0000041	414	23	0.8215	--	--	--	--	--	--	--	--	--	--	--	--	--	--	--	--	--	--	--	-	-	-	--	--	--	--	--	--	--	--	--	--	--	--	--	--	--	--	--	--	--
Unigene0000042	522	36	1.0198	gi|658063852|ref|XP_008367855.1|	55.5	3e-07	PREDICTED: protein gar2-like [Malus domestica]	--	--	--	--	--	--	--	--	--	--	--	--	--	--	--	-	-	-	--	--	--	--	--	--	--	--	--	--	--	--	--	--	--	--	--	--	--
Unigene0000043	255	16	0.9278	--	--	--	--	--	--	--	--	--	--	--	--	--	--	--	--	--	--	--	-	-	-	--	--	--	--	--	--	--	--	--	--	--	--	--	--	--	--	--	--	--
Unigene0000044	302	15	0.7344	gi|659073029|ref|XP_008467223.1|	115	4e-29	PREDICTED: probable (S)-N-methylcoclaurine 3'-hydroxylase isozyme 2 [Cucumis melo]	sp|O64899|C80B1_ESCCA	84.7	8e-19	(S)-N-methylcoclaurine 3'-hydroxylase isozyme 1 (Fragment) OS=Eschscholzia californica GN=CYP80B1 PE=2 SV=1	At3g52970	67.4	1e-13	KOG0156	Cytochrome P450 CYP2 subfamily	--	--	--	--	--	--	-	GO:0043167//ion binding;GO:0043169//cation binding;GO:0005488//binding;GO:0003824//catalytic activity;GO:0004497//monooxygenase activity;GO:0016705//oxidoreductase activity, acting on paired donors, with incorporation or reduction of molecular oxygen;GO:0046872//metal ion binding;GO:0016491//oxidoreductase activity	-	3	88	p450	Domain	28.2	6e-07	--	--	--	--	--	--	--	--	--	--	--	--	--
Unigene0000045	246	13	0.7814	--	--	--	--	--	--	--	--	--	--	--	--	--	--	--	--	--	--	--	-	-	-	--	--	--	--	--	--	--	--	--	--	--	--	--	--	--	--	--	--	--
Unigene0000046	1667	3539	31.3915	gi|356498252|ref|XP_003517967.1|	487	9e-165	PREDICTED: soyasapogenol B glucuronide galactosyltransferase-like [Glycine max]	sp|D4Q9Z4|SGT2_SOYBN	477	1e-161	Soyasapogenol B glucuronide galactosyltransferase OS=Glycine max GN=GmSGT2 PE=1 SV=1	At2g15480	391	5e-129	KOG1192	UDP-glucuronosyl and UDP-glucosyl transferase	K18822//soyasapogenol B glucuronide galactosyltransferase [EC:2.4.1.272]	7e-162	479	gmx:100777250	--	-	GO:0003824//catalytic activity;GO:0016740//transferase activity	-	237	401	UDPGT	Family	76.1	1.8e-21	--	--	--	--	--	--	--	--	--	--	--	--	--
Unigene0000047	809	0	0	gi|734327969|gb|KHN05821.1|	253	9e-80	Abscisate beta-glucosyltransferase [Glycine soja]	sp|Q8W3P8|AOG_PHAAN	240	4e-74	Abscisate beta-glucosyltransferase OS=Phaseolus angularis GN=AOG PE=1 SV=1	At2g15490	221	9e-68	KOG1192	UDP-glucuronosyl and UDP-glucosyl transferase	K14595//abscisate beta-glucosyltransferase [EC:2.4.1.263]	4e-78	251	rcu:RCOM_0812550	ko00906//Carotenoid biosynthesis//Metabolism of terpenoids and polyketides//Metabolism	-	GO:0016740//transferase activity;GO:0003824//catalytic activity;GO:0016757//transferase activity, transferring glycosyl groups	-	16	147	UDPGT	Family	74.2	6.7e-21	--	--	--	--	--	--	--	--	--	--	--	--	--
Unigene0000048	218	15	1.0174	--	--	--	--	--	--	--	--	--	--	--	--	--	--	--	--	--	--	--	-	-	-	--	--	--	--	--	--	--	--	--	--	--	--	--	--	--	--	--	--	--
Unigene0000049	711	2831	58.8759	gi|743899112|ref|XP_011042848.1|	192	1e-59	PREDICTED: U6 snRNA-associated Sm-like protein LSm3 [Populus euphratica]	sp|Q9LMN4|LSM3A_ARATH	175	5e-54	Sm-like protein LSM3A OS=Arabidopsis thaliana GN=LSM3A PE=1 SV=1	At1g21190	175	8e-55	KOG3460	Small nuclear ribonucleoprotein (snRNP) LSM3	K12622//U6 snRNA-associated Sm-like protein LSm3	3e-59	191	pop:POPTR_0002s06940g	ko03040//Spliceosome//Transcription//Genetic Information Processing;ko03018//RNA degradation//Folding, sorting and degradation//Genetic Information Processing	-	-	GO:0032991//macromolecular complex;GO:0044423//virion part;GO:0019012//virion	26	101	LSM	Domain	60.7	6.2e-17	23	101	Sm	8.2e-23	78.2	--	--	--	--	--	--	--	--
Unigene0000050	500	1042	30.8152	gi|674900517|emb|CDY32540.1|	74.3	3e-15	BnaA09g50560D [Brassica napus]	sp|Q6NN02|Y4445_ARATH	76.6	1e-16	Uncharacterized protein At4g14450, chloroplastic OS=Arabidopsis thaliana GN=At4g14450 PE=2 SV=1	--	--	--	--	--	--	--	--	--	--	--	-	-	-	--	--	--	--	--	--	--	--	--	--	--	--	--	--	--	--	--	--	--
Unigene0000051	268	13	0.7173	--	--	--	--	--	--	--	--	--	--	--	--	--	--	--	--	--	--	--	-	-	-	--	--	--	--	--	--	--	--	--	--	--	--	--	--	--	--	--	--	--
Unigene0000052	596	8	0.1985	gi|449451345|ref|XP_004143422.1|	254	2e-76	PREDICTED: leucine-rich repeat receptor-like serine/threonine-protein kinase BAM1 [Cucumis sativus]	sp|O49545|BAME1_ARATH	206	6e-60	Leucine-rich repeat receptor-like serine/threonine-protein kinase BAM1 OS=Arabidopsis thaliana GN=BAM1 PE=1 SV=1	At1g78530	78.2	1e-16	KOG1187	Serine/threonine protein kinase	--	--	--	--	--	--	GO:0044763//single-organism cellular process;GO:0031323//regulation of cellular metabolic process;GO:0001932//regulation of protein phosphorylation;GO:0045937//positive regulation of phosphate metabolic process;GO:0044093//positive regulation of molecular function;GO:0051174//regulation of phosphorus metabolic process;GO:0009987//cellular process;GO:0044700//single organism signaling;GO:0032268//…	GO:0016491//oxidoreductase activity;GO:0032549//ribonucleoside binding;GO:0016301//kinase activity;GO:0016627//oxidoreductase activity, acting on the CH-CH group of donors;GO:0003824//catalytic activity;GO:1901363//heterocyclic compound binding;GO:0016740//transferase activity;GO:0036094//small molecule binding;GO:0004871//signal transducer activity;GO:0004674//protein serine/threonine kinase act…	GO:0044425//membrane part;GO:0016020//membrane;GO:0031224//intrinsic component of membrane	7	103	Pkinase_Tyr	Domain	29.6	3.2e-07	--	--	--	--	--	--	PRGWK00000123	MELO3C007676	Contributed_R-Genes	Cucumis melo	RLK	4e-79	259
Unigene0000053	3289	7453	33.5069	gi|449451345|ref|XP_004143422.1|	1839	0	PREDICTED: leucine-rich repeat receptor-like serine/threonine-protein kinase BAM1 [Cucumis sativus]	sp|O49545|BAME1_ARATH	1593	0	Leucine-rich repeat receptor-like serine/threonine-protein kinase BAM1 OS=Arabidopsis thaliana GN=BAM1 PE=1 SV=1	At1g73070	278	1e-80	KOG0619	FOG: Leucine rich repeat	--	--	--	--	--	--	GO:0001934//positive regulation of protein phosphorylation;GO:0009987//cellular process;GO:0019222//regulation of metabolic process;GO:0033674//positive regulation of kinase activity;GO:0008152//metabolic process;GO:0048518//positive regulation of biological process;GO:0031325//positive regulation of cellular metabolic process;GO:0044710//single-organism metabolic process;GO:0051338//regulation o…	GO:0005057//receptor signaling protein activity;GO:0001882//nucleoside binding;GO:0032549//ribonucleoside binding;GO:0097367//carbohydrate derivative binding;GO:0032550//purine ribonucleoside binding;GO:0016628//oxidoreductase activity, acting on the CH-CH group of donors, NAD or NADP as acceptor;GO:0004871//signal transducer activity;GO:0016740//transferase activity;GO:0016773//phosphotransferas…	GO:0044425//membrane part;GO:0031224//intrinsic component of membrane;GO:0016020//membrane	6|117|167|264|337|505|672	43|134|189|322|356|563|895	LRRNT_2|LRR_6|LRR_1|LRR_8|LRR_1|LRR_8|Pkinase	Family|Repeat|Repeat|Repeat|Repeat|Repeat|Domain	49.3|11.0|10.5|30.4|13.3|30.8|154.8	3e-13|0.33|0.47|2.1e-07|0.059|1.6e-07|2.1e-45	671|670	888|828	S_TKc|TyrKc	7.7e-38|7.2e-33	127.5|110.6	--	PRGDB00151236	Cucsa.103590.1	Putative_R-Genes,_predicted_from_Pythozome	Pennisetum glaucum	RLP	0	1841
Unigene0000054	207	19	1.3572	--	--	--	--	--	--	--	--	--	--	--	--	--	--	--	--	--	--	--	-	-	-	--	--	--	--	--	--	--	--	--	--	--	--	--	--	--	--	--	--	--
Unigene0000055	446	37	1.2267	--	--	--	--	--	--	--	--	--	--	--	--	--	--	--	--	--	--	--	-	-	-	--	--	--	--	--	--	--	--	--	--	--	--	--	--	--	--	--	--	--
Unigene0000056	270	17	0.931	gi|743786388|ref|XP_011027642.1|	67.8	1e-18	PREDICTED: transposon Ty3-G Gag-Pol polyprotein [Populus euphratica]	--	--	--	--	At2g14640_2	54.7	2e-16	KOG0017	FOG: Transposon-encoded proteins with TYA, reverse transcriptase, integrase domains in various combinations	--	--	--	--	--	--	GO:0008152//metabolic process	GO:0097159//organic cyclic compound binding;GO:0005488//binding;GO:0003676//nucleic acid binding;GO:1901363//heterocyclic compound binding	-	--	--	--	--	--	--	--	--	--	--	--	--	--	--	--	--	--	--	--
Unigene0000057	249	6	0.3563	--	--	--	--	--	--	--	--	--	--	--	--	--	--	--	--	--	--	--	-	-	-	--	--	--	--	--	--	--	--	--	--	--	--	--	--	--	--	--	--	--
Unigene0000058	714	3100	64.1994	gi|659071020|ref|XP_008457774.1|	196	2e-60	PREDICTED: early nodulin-93-like [Cucumis melo]	sp|Q02921|NO93_SOYBN	120	1e-32	Early nodulin-93 OS=Glycine max PE=2 SV=1	--	--	--	--	--	--	--	--	--	--	--	-	-	-	50	127	ENOD93	Family	134.9	5.2e-40	--	--	--	--	--	--	--	--	--	--	--	--	--
Unigene0000059	623	58	1.3766	gi|15232400|ref|NP_191628.1|	137	6e-38	SAUR-like auxin-responsive protein [Arabidopsis thaliana]	sp|O22150|SAU36_ARATH	112	2e-29	Auxin-responsive protein SAUR36 OS=Arabidopsis thaliana GN=SAUR36 PE=2 SV=1	--	--	--	--	--	K14488//SAUR family protein	4e-81	247	cmo:103497676	ko04075//Plant hormone signal transduction//Signal transduction//Environmental Information Processing	-	-	-	62	143	Auxin_inducible	Family	83.8	6.1e-24	--	--	--	--	--	--	--	--	--	--	--	--	--
Unigene0000060	579	0	0	gi|15232400|ref|NP_191628.1|	137	5e-38	SAUR-like auxin-responsive protein [Arabidopsis thaliana]	sp|O22150|SAU36_ARATH	112	2e-29	Auxin-responsive protein SAUR36 OS=Arabidopsis thaliana GN=SAUR36 PE=2 SV=1	--	--	--	--	--	K14488//SAUR family protein	3e-81	246	cmo:103497676	ko04075//Plant hormone signal transduction//Signal transduction//Environmental Information Processing	-	-	-	62	143	Auxin_inducible	Family	83.8	6.1e-24	--	--	--	--	--	--	--	--	--	--	--	--	--
Unigene0000061	295	26	1.3032	--	--	--	--	--	--	--	--	--	--	--	--	--	--	--	--	--	--	--	-	-	-	--	--	--	--	--	--	--	--	--	--	--	--	--	--	--	--	--	--	--
Unigene0000062	757	1426	27.8542	gi|449444757|ref|XP_004140140.1|	214	5e-67	PREDICTED: HVA22-like protein f [Cucumis sativus]	sp|Q682H0|HA22F_ARATH	124	1e-33	HVA22-like protein f OS=Arabidopsis thaliana GN=HVA22F PE=2 SV=1	At1g69700	95.9	2e-23	KOG1725	Protein involved in membrane traffic (YOP1/TB2/DP1/HVA22 family)	K17279//receptor expression-enhancing protein 5/6	2e-67	214	csv:101213584	--	-	-	-	10	102	TB2_DP1_HVA22	Family	90.8	3e-26	--	--	--	--	--	--	--	--	--	--	--	--	--
Unigene0000063	325	22	1.0009	gi|719975398|ref|XP_010247525.1|	60.5	4e-10	PREDICTED: uncharacterized protein LOC104590523 [Nelumbo nucifera]	--	--	--	--	--	--	--	--	--	--	--	--	--	--	--	-	-	-	--	--	--	--	--	--	--	--	--	--	--	--	--	--	--	--	--	--	--
Unigene0000064	208	15	1.0663	--	--	--	--	--	--	--	--	--	--	--	--	--	--	--	--	--	--	--	-	-	-	--	--	--	--	--	--	--	--	--	--	--	--	--	--	--	--	--	--	--
Unigene0000065	326	15	0.6804	gi|659083693|ref|XP_008442490.1|	74.7	3e-14	PREDICTED: rop guanine nucleotide exchange factor 7-like [Cucumis melo]	--	--	--	--	--	--	--	--	--	--	--	--	--	--	--	-	-	-	--	--	--	--	--	--	--	--	--	--	--	--	--	--	--	--	--	--	--
Unigene0000066	284	3	0.1562	--	--	--	--	--	--	--	--	--	--	--	--	--	--	--	--	--	--	--	-	-	-	--	--	--	--	--	--	--	--	--	--	--	--	--	--	--	--	--	--	--
Unigene0000067	439	17	0.5726	--	--	--	--	--	--	--	--	--	--	--	--	--	--	--	--	--	--	--	-	-	-	--	--	--	--	--	--	--	--	--	--	--	--	--	--	--	--	--	--	--
Unigene0000068	245	14	0.8449	gi|758329966|gb|AJO67751.1|	150	2e-42	YUCCA type protein 5 [Cucumis melo]	sp|Q9SVU0|YUC8_ARATH	133	5e-37	Probable indole-3-pyruvate monooxygenase YUCCA8 OS=Arabidopsis thaliana GN=YUC8 PE=2 SV=1	At4g28720	133	7e-38	KOG1399	Flavin-containing monooxygenase	K11816//indole-3-pyruvate monooxygenase [EC:1.14.13.168]	2e-42	149	cmo:103489823	ko00380//Tryptophan metabolism//Amino acid metabolism//Metabolism	GO:0044710//single-organism metabolic process;GO:0008152//metabolic process;GO:0044699//single-organism process	GO:0016491//oxidoreductase activity;GO:0016705//oxidoreductase activity, acting on paired donors, with incorporation or reduction of molecular oxygen;GO:0005488//binding;GO:0003824//catalytic activity;GO:0036094//small molecule binding;GO:0004497//monooxygenase activity;GO:1901363//heterocyclic compound binding;GO:0097159//organic cyclic compound binding;GO:0000166//nucleotide binding;GO:0016709/…	-	19	80	FMO-like	Family	23.6	1.2e-05	--	--	--	--	--	--	--	--	--	--	--	--	--
Unigene0000069	1097	1644	22.1596	gi|659079234|ref|XP_008440147.1|	341	5e-115	PREDICTED: stress enhanced protein 2, chloroplastic [Cucumis melo]	sp|Q9SJ02|STEP2_ARATH	208	7e-64	Stress enhanced protein 2, chloroplastic OS=Arabidopsis thaliana GN=SEP2 PE=2 SV=1	--	--	--	--	--	--	--	--	--	--	--	GO:0044237//cellular metabolic process;GO:0009987//cellular process;GO:0008152//metabolic process	-	GO:0043227//membrane-bounded organelle;GO:0044424//intracellular part;GO:0005623//cell;GO:0044425//membrane part;GO:0005737//cytoplasm;GO:0009579//thylakoid;GO:0009507//chloroplast;GO:0044444//cytoplasmic part;GO:0034357//photosynthetic membrane;GO:0044464//cell part;GO:0005622//intracellular;GO:0016020//membrane;GO:0044436//thylakoid part;GO:0009536//plastid;GO:0043229//intracellular organelle;G…	--	--	--	--	--	--	--	--	--	--	--	--	--	--	--	--	--	--	--
Unigene0000070	618	61	1.4595	--	--	--	--	--	--	--	--	--	--	--	--	--	--	--	--	--	--	--	-	-	-	--	--	--	--	--	--	--	--	--	--	--	--	--	--	--	--	--	--	--
Unigene0000071	241	10	0.6136	gi|449443652|ref|XP_004139591.1|	117	2e-32	PREDICTED: transcription repressor OFP6 [Cucumis sativus]	sp|Q3EAL1|OFP6_ARATH	72.8	5e-16	Transcription repressor OFP6 OS=Arabidopsis thaliana GN=OFP6 PE=1 SV=1	--	--	--	--	--	--	--	--	--	--	--	-	-	-	40	79	Ovate	Family	58.1	5e-16	--	--	--	--	--	--	--	--	--	--	--	--	--
Unigene0000072	390	16	0.6066	--	--	--	--	--	--	--	--	--	--	--	--	--	--	--	--	--	--	--	-	-	-	--	--	--	--	--	--	--	--	--	--	--	--	--	--	--	--	--	--	--
Unigene0000073	341	15	0.6504	gi|334185563|ref|NP_188975.3|	55.1	2e-07	pentatricopeptide repeat-containing protein [Arabidopsis thaliana]	--	--	--	--	At3g23330	55.1	5e-09	KOG4197	FOG: PPR repeat	--	--	--	--	--	--	-	-	-	--	--	--	--	--	--	--	--	--	--	--	--	--	--	--	--	--	--	--
Unigene0000074	737	77	1.5449	gi|387965727|gb|AFK13856.1|	48.9	3e-12	Ty3/gypsy retrotransposon protein [Beta vulgaris subsp. vulgaris]	--	--	--	--	--	--	--	--	--	--	--	--	--	--	--	-	-	-	--	--	--	--	--	--	--	--	--	--	--	--	--	--	--	--	--	--	--
Unigene0000075	824	89	1.5971	gi|659109397|ref|XP_008454696.1|	58.9	9e-08	PREDICTED: uncharacterized protein LOC103495051 [Cucumis melo]	--	--	--	--	--	--	--	--	--	--	--	--	--	--	--	-	-	-	--	--	--	--	--	--	--	--	--	--	--	--	--	--	--	--	--	--	--
Unigene0000076	236	9	0.5639	--	--	--	--	--	--	--	--	--	--	--	--	--	--	--	--	--	--	--	-	-	-	--	--	--	--	--	--	--	--	--	--	--	--	--	--	--	--	--	--	--
Unigene0000077	239	0	0	--	--	--	--	--	--	--	--	--	--	--	--	--	--	--	--	--	--	--	-	-	-	--	--	--	--	--	--	--	--	--	--	--	--	--	--	--	--	--	--	--
Unigene0000078	238	0	0	--	--	--	--	--	--	--	--	--	--	--	--	--	--	--	--	--	--	--	-	-	-	--	--	--	--	--	--	--	--	--	--	--	--	--	--	--	--	--	--	--
Unigene0000079	252	12	0.7041	--	--	--	--	--	--	--	--	--	--	--	--	--	--	--	--	--	--	--	-	-	-	--	--	--	--	--	--	--	--	--	--	--	--	--	--	--	--	--	--	--
Unigene0000080	500	42	1.2421	--	--	--	--	--	--	--	--	--	--	--	--	--	--	--	--	--	--	--	-	-	-	--	--	--	--	--	--	--	--	--	--	--	--	--	--	--	--	--	--	--
Unigene0000081	321	0	0	--	--	--	--	--	--	--	--	--	--	--	--	--	--	--	--	--	--	--	-	-	-	--	--	--	--	--	--	--	--	--	--	--	--	--	--	--	--	--	--	--
Unigene0000082	384	50	1.9253	gi|778668490|ref|XP_011649103.1|	150	4e-40	PREDICTED: small subunit processome component 20 homolog [Cucumis sativus]	--	--	--	--	At4g30990	78.6	1e-16	KOG1823	DRIM (Down-regulated in metastasis)-like proteins	K14772//U3 small nucleolar RNA-associated protein 20	2e-40	150	csv:101208309	--	-	-	-	--	--	--	--	--	--	--	--	--	--	--	--	--	--	--	--	--	--	--
Unigene0000083	416	36	1.2796	--	--	--	--	--	--	--	--	--	--	--	--	--	--	--	--	--	--	--	-	-	-	--	--	--	--	--	--	--	--	--	--	--	--	--	--	--	--	--	--	--
Unigene0000084	320	20	0.9242	gi|659127575|ref|XP_008463773.1|	91.7	6e-20	PREDICTED: probable LRR receptor-like serine/threonine-protein kinase At1g53440 [Cucumis melo]	sp|C0LGE0|Y1765_ARATH	47.8	7e-06	Probable LRR receptor-like serine/threonine-protein kinase At1g07650 OS=Arabidopsis thaliana GN=At1g07650 PE=1 SV=1	--	--	--	--	--	--	--	--	--	--	--	GO:0044267//cellular protein metabolic process;GO:0044260//cellular macromolecule metabolic process;GO:0019538//protein metabolic process;GO:0043170//macromolecule metabolic process;GO:0006796//phosphate-containing compound metabolic process;GO:0006464//cellular protein modification process;GO:0009987//cellular process;GO:0043412//macromolecule modification;GO:0044238//primary metabolic process;G…	GO:0003824//catalytic activity;GO:0016740//transferase activity;GO:0032550//purine ribonucleoside binding;GO:1901363//heterocyclic compound binding;GO:0016301//kinase activity;GO:0005488//binding;GO:0036094//small molecule binding;GO:0016773//phosphotransferase activity, alcohol group as acceptor;GO:0032549//ribonucleoside binding;GO:0001883//purine nucleoside binding;GO:0001882//nucleoside bindi…	-	--	--	--	--	--	--	--	--	--	--	--	--	--	--	--	--	--	--	--
Unigene0000085	245	14	0.8449	--	--	--	--	--	--	--	--	--	--	--	--	--	--	--	--	--	--	--	-	-	-	--	--	--	--	--	--	--	--	--	--	--	--	--	--	--	--	--	--	--
Unigene0000086	220	2	0.1344	--	--	--	--	--	--	--	--	--	--	--	--	--	--	--	--	--	--	--	-	-	-	--	--	--	--	--	--	--	--	--	--	--	--	--	--	--	--	--	--	--
Unigene0000087	289	15	0.7675	--	--	--	--	--	--	--	--	--	--	--	--	--	--	--	--	--	--	--	-	-	-	--	--	--	--	--	--	--	--	--	--	--	--	--	--	--	--	--	--	--
Unigene0000088	228	0	0	--	--	--	--	--	--	--	--	--	--	--	--	--	--	--	--	--	--	--	-	-	-	--	--	--	--	--	--	--	--	--	--	--	--	--	--	--	--	--	--	--
Unigene0000089	413	18	0.6445	--	--	--	--	--	--	--	--	--	--	--	--	--	--	--	--	--	--	--	-	-	-	--	--	--	--	--	--	--	--	--	--	--	--	--	--	--	--	--	--	--
Unigene0000090	839	88	1.5509	gi|659118662|ref|XP_008459237.1|	527	1e-168	PREDICTED: serine/threonine-protein kinase SMG1-like [Cucumis melo]	--	--	--	--	--	--	--	--	--	K08873//PI-3-kinase-related kinase SMG-1	5e-169	527	cmo:103498422	ko03015//mRNA surveillance pathway//Translation//Genetic Information Processing	GO:0044763//single-organism cellular process;GO:0044699//single-organism process;GO:0051716//cellular response to stimulus;GO:0035556//intracellular signal transduction;GO:0006796//phosphate-containing compound metabolic process;GO:0006793//phosphorus metabolic process;GO:0044237//cellular metabolic process;GO:0065007//biological regulation;GO:0050794//regulation of cellular process;GO:0044700//s…	GO:0097159//organic cyclic compound binding;GO:0036094//small molecule binding;GO:0005488//binding;GO:0003824//catalytic activity;GO:0004673//protein histidine kinase activity;GO:0001882//nucleoside binding;GO:0016301//kinase activity;GO:0004672//protein kinase activity;GO:0016775//phosphotransferase activity, nitrogenous group as acceptor;GO:0016773//phosphotransferase activity, alcohol group as…	-	123	261	FAT	Family	25.3	6.3e-06	--	--	--	--	--	--	--	--	--	--	--	--	--
Unigene0000091	336	20	0.8802	gi|659118662|ref|XP_008459237.1|	209	1e-60	PREDICTED: serine/threonine-protein kinase SMG1-like [Cucumis melo]	--	--	--	--	--	--	--	--	--	K08873//PI-3-kinase-related kinase SMG-1	5e-61	209	cmo:103498422	ko03015//mRNA surveillance pathway//Translation//Genetic Information Processing	GO:0023052//signaling;GO:0006796//phosphate-containing compound metabolic process;GO:0007154//cell communication;GO:0050794//regulation of cellular process;GO:0044237//cellular metabolic process;GO:0051716//cellular response to stimulus;GO:0009987//cellular process;GO:0044763//single-organism cellular process;GO:0050789//regulation of biological process;GO:0006793//phosphorus metabolic process;GO…	GO:0001883//purine nucleoside binding;GO:0005488//binding;GO:0016772//transferase activity, transferring phosphorus-containing groups;GO:0032550//purine ribonucleoside binding;GO:0097367//carbohydrate derivative binding;GO:0016740//transferase activity;GO:0001882//nucleoside binding;GO:0016773//phosphotransferase activity, alcohol group as acceptor;GO:0032549//ribonucleoside binding;GO:0016301//k…	-	--	--	--	--	--	--	--	--	--	--	--	--	--	--	--	--	--	--	--
Unigene0000092	274	21	1.1333	--	--	--	--	--	--	--	--	--	--	--	--	--	--	--	--	--	--	--	-	-	-	--	--	--	--	--	--	--	--	--	--	--	--	--	--	--	--	--	--	--
Unigene0000093	2440	19788	119.917	gi|82469976|gb|ABB77236.1|	949	0	patellin 1 [Cucurbita pepo]	sp|Q56Z59|PATL3_ARATH	475	2e-157	Patellin-3 OS=Arabidopsis thaliana GN=PATL3 PE=1 SV=2	At1g72160	475	3e-158	KOG1471	Phosphatidylinositol transfer protein SEC14 and related proteins	--	--	--	--	--	--	GO:0051179//localization;GO:0051234//establishment of localization	-	GO:0044425//membrane part;GO:0016020//membrane;GO:0031224//intrinsic component of membrane	285|336	314|497	CRAL_TRIO_N|CRAL_TRIO	Domain|Domain	34.3|106.1	1.7e-08|1.1e-30	289|336	314|500	CRAL_TRIO_N|SEC14	1.7e-09|6.9e-38	35.1|128.0	--	--	--	--	--	--	--	--
Unigene0000094	997	55	0.8157	gi|659119484|ref|XP_008459681.1|	265	2e-80	PREDICTED: patellin-3-like [Cucumis melo]	sp|Q56ZI2|PATL2_ARATH	150	5e-39	Patellin-2 OS=Arabidopsis thaliana GN=PATL2 PE=1 SV=2	At1g22530	150	7e-40	KOG1471	Phosphatidylinositol transfer protein SEC14 and related proteins	--	--	--	--	--	--	GO:0051234//establishment of localization;GO:0044237//cellular metabolic process;GO:0008152//metabolic process;GO:0051179//localization;GO:0006796//phosphate-containing compound metabolic process;GO:0006793//phosphorus metabolic process;GO:0009987//cellular process	GO:0042578//phosphoric ester hydrolase activity;GO:0016788//hydrolase activity, acting on ester bonds;GO:0003824//catalytic activity;GO:0016787//hydrolase activity	GO:0016020//membrane;GO:0031224//intrinsic component of membrane;GO:0005623//cell;GO:0044464//cell part;GO:0044425//membrane part	--	--	--	--	--	--	--	--	--	--	--	--	--	--	--	--	--	--	--
Unigene0000095	741	151	3.0132	gi|659088182|ref|XP_008444844.1|	240	5e-76	PREDICTED: RNA-binding protein 38-like [Cucumis melo]	sp|Q9M1S3|ARP1_ARATH	120	6e-31	Probable RNA-binding protein ARP1 OS=Arabidopsis thaliana GN=ARP1 PE=2 SV=1	At1g76460	163	7e-48	KOG0149	Predicted RNA-binding protein SEB4 (RRM superfamily)	--	--	--	--	--	--	-	GO:0005488//binding;GO:0097159//organic cyclic compound binding;GO:0036094//small molecule binding	-	19	77	RRM_1	Domain	67	7.2e-19	18	90	RRM	2.4e-27	93.9	--	--	--	--	--	--	--	--
Unigene0000096	278	25	1.3297	gi|778671668|ref|XP_004152633.2|	103	8e-26	PREDICTED: RNA-binding protein 38-like [Cucumis sativus]	--	--	--	--	--	--	--	--	--	--	--	--	--	--	--	-	GO:0097159//organic cyclic compound binding;GO:0005488//binding	-	--	--	--	--	--	--	--	--	--	--	--	--	--	--	--	--	--	--	--
Unigene0000097	252	21	1.2322	gi|449461687|ref|XP_004148573.1|	68.2	3e-12	PREDICTED: probable metal-nicotianamine transporter YSL7 [Cucumis sativus]	--	--	--	--	--	--	--	--	--	--	--	--	--	--	--	GO:0044763//single-organism cellular process;GO:0044699//single-organism process;GO:0009987//cellular process	-	-	--	--	--	--	--	--	--	--	--	--	--	--	--	--	--	--	--	--	--
Unigene0000098	494	85	2.5442	gi|333796940|gb|AEF98135.1|	243	7e-76	cytochrome c oxidase subunit I, partial (mitochondrion) [Lingulodinium polyedrum]	sp|P00395|COX1_HUMAN	289	2e-94	Cytochrome c oxidase subunit 1 OS=Homo sapiens GN=MT-CO1 PE=1 SV=1	HsMi003	289	3e-95	KOG4769	Cytochrome c oxidase, subunit I	K02256//cytochrome c oxidase subunit 1 [EC:1.9.3.1]	9e-41	149	bvg:809579	ko00190//Oxidative phosphorylation//Energy metabolism//Metabolism	GO:0044763//single-organism cellular process;GO:0044710//single-organism metabolic process;GO:0015992//proton transport;GO:0015672//monovalent inorganic cation transport;GO:0008152//metabolic process;GO:0006812//cation transport;GO:0051179//localization;GO:0006091//generation of precursor metabolites and energy;GO:0044237//cellular metabolic process;GO:0045333//cellular respiration;GO:0015980//en…	GO:0005488//binding;GO:0043167//ion binding;GO:0003824//catalytic activity;GO:0097159//organic cyclic compound binding;GO:0046872//metal ion binding;GO:1901363//heterocyclic compound binding;GO:0046914//transition metal ion binding;GO:0046906//tetrapyrrole binding;GO:0009055//electron carrier activity;GO:0043169//cation binding	GO:0044464//cell part;GO:0043229//intracellular organelle;GO:0031967//organelle envelope;GO:0044424//intracellular part;GO:0019866//organelle inner membrane;GO:0031975//envelope;GO:0044422//organelle part;GO:0044446//intracellular organelle part;GO:0043231//intracellular membrane-bounded organelle;GO:0016020//membrane;GO:0005622//intracellular;GO:0044425//membrane part;GO:0031090//organelle membr…	2	100	COX1	Family	118.7	2.2e-34	--	--	--	--	--	--	--	--	--	--	--	--	--
Unigene0000099	1059	172	2.4016	gi|333796920|gb|AEF98125.1|	516	1e-179	cytochrome c oxidase subunit I, partial (mitochondrion) [Lingulodinium polyedrum]	sp|Q9T9W1|COX1_PANTR	574	0	Cytochrome c oxidase subunit 1 OS=Pan troglodytes GN=MT-CO1 PE=3 SV=1	HsMi003	573	0	KOG4769	Cytochrome c oxidase, subunit I	K02256//cytochrome c oxidase subunit 1 [EC:1.9.3.1]	1e-157	461	cvr:OJ20_p01	ko00190//Oxidative phosphorylation//Energy metabolism//Metabolism	GO:0044699//single-organism process;GO:0006818//hydrogen transport;GO:0044765//single-organism transport;GO:0051234//establishment of localization;GO:0006811//ion transport;GO:0015980//energy derivation by oxidation of organic compounds;GO:0015992//proton transport;GO:0009987//cellular process;GO:0015672//monovalent inorganic cation transport;GO:0006091//generation of precursor metabolites and en…	GO:0043169//cation binding;GO:0009055//electron carrier activity;GO:0046906//tetrapyrrole binding;GO:0003824//catalytic activity;GO:0043167//ion binding;GO:0097159//organic cyclic compound binding;GO:0005488//binding;GO:0046914//transition metal ion binding;GO:1901363//heterocyclic compound binding;GO:0046872//metal ion binding	GO:0016020//membrane;GO:0044424//intracellular part;GO:0031224//intrinsic component of membrane;GO:0044464//cell part;GO:0043231//intracellular membrane-bounded organelle;GO:0031090//organelle membrane;GO:0044425//membrane part;GO:0005622//intracellular;GO:0005623//cell;GO:0043229//intracellular organelle;GO:0031967//organelle envelope;GO:0043227//membrane-bounded organelle;GO:0043226//organelle;…	2	345	COX1	Family	367.6	6.6e-110	--	--	--	--	--	--	--	--	--	--	--	--	--
Unigene0000100	212	7	0.4882	gi|674920299|emb|CDY12894.1|	54.3	5e-08	BnaA09g13800D [Brassica napus]	--	--	--	--	--	--	--	--	--	--	--	--	--	--	--	-	-	-	7	40	DUF4408	Family	41.1	8.4e-11	--	--	--	--	--	--	--	--	--	--	--	--	--
Unigene0000101	764	83	1.6064	gi|659087984|ref|XP_008444740.1|	388	8e-131	PREDICTED: abscisic acid 8'-hydroxylase 2 [Cucumis melo]	sp|Q9M066|C90C1_ARATH	123	1e-30	3-epi-6-deoxocathasterone 23-monooxygenase OS=Arabidopsis thaliana GN=ROT3 PE=2 SV=3	At1g19630	258	5e-83	KOG0157	Cytochrome P450 CYP4/CYP19/CYP26 subfamilies	K07437//cytochrome P450, family 26, subfamily A	7e-130	384	csv:101215324	--	GO:0044699//single-organism process;GO:0008152//metabolic process;GO:0044710//single-organism metabolic process	GO:0046914//transition metal ion binding;GO:1901363//heterocyclic compound binding;GO:0043169//cation binding;GO:0043167//ion binding;GO:0016491//oxidoreductase activity;GO:0046872//metal ion binding;GO:0046906//tetrapyrrole binding;GO:0097159//organic cyclic compound binding;GO:0005488//binding;GO:0003824//catalytic activity	-	6	248	p450	Domain	51.8	4.1e-14	--	--	--	--	--	--	--	--	--	--	--	--	--
Unigene0000102	645	211	4.8372	gi|659101524|ref|XP_008451651.1|	85.9	9e-18	PREDICTED: RING finger and CHY zinc finger domain-containing protein 1-like [Cucumis melo]	--	--	--	--	--	--	--	--	--	K10144//RING finger and CHY zinc finger domain-containing protein 1 [EC:2.3.2.27]	4e-18	85.9	cmo:103492883	ko04120//Ubiquitin mediated proteolysis//Folding, sorting and degradation//Genetic Information Processing	-	-	-	--	--	--	--	--	--	--	--	--	--	--	--	--	--	--	--	--	--	--
Unigene0000103	238	13	0.8077	--	--	--	--	--	--	--	--	--	--	--	--	--	--	--	--	--	--	--	-	-	-	--	--	--	--	--	--	--	--	--	--	--	--	--	--	--	--	--	--	--
Unigene0000104	1260	1717	20.1496	gi|449454203|ref|XP_004144845.1|	765	0	PREDICTED: WD-40 repeat-containing protein MSI2-like [Cucumis sativus]	sp|O22469|MSI3_ARATH	595	0	WD-40 repeat-containing protein MSI3 OS=Arabidopsis thaliana GN=MSI3 PE=1 SV=2	At4g35050	595	0	KOG0264	Nucleosome remodeling factor, subunit CAF1/NURF55/MSI1	K10752//histone-binding protein RBBP4	0	765	csv:101207920	--	GO:0044260//cellular macromolecule metabolic process;GO:0071840//cellular component organization or biogenesis;GO:0016569//covalent chromatin modification;GO:0043412//macromolecule modification;GO:0016570//histone modification;GO:0036211//protein modification process;GO:0071704//organic substance metabolic process;GO:1902589//single-organism organelle organization;GO:0044267//cellular protein met…	GO:0016407//acetyltransferase activity;GO:0016740//transferase activity;GO:0008080//N-acetyltransferase activity;GO:0016747//transferase activity, transferring acyl groups other than amino-acyl groups;GO:0016746//transferase activity, transferring acyl groups;GO:0090595//acetyl-CoA:L-lysine N6-acetyltransferase;GO:0016410//N-acyltransferase activity;GO:0003824//catalytic activity	GO:0044424//intracellular part;GO:0043226//organelle;GO:0043227//membrane-bounded organelle;GO:0005622//intracellular;GO:0044464//cell part;GO:0043229//intracellular organelle;GO:0043231//intracellular membrane-bounded organelle;GO:0005623//cell	14|158|209|251|293|350	85|195|244|287|331|386	CAF1C_H4-bd|WD40|WD40|WD40|WD40|WD40	Family|Repeat|Repeat|Repeat|Repeat|Repeat	83.4|27.6|19.2|21.1|29.8|17.1	6.9e-24|1.6e-06|0.00069|0.00019|3.2e-07|0.0032	155|206|247|292	195|244|287|331	WD40|WD40|WD40|WD40	4.9e-32|4.9e-32|4.9e-32|4.9e-32	109.8|109.8|109.8|109.8	--	--	--	--	--	--	--	--
Unigene0000105	312	0	0	--	--	--	--	--	--	--	--	--	--	--	--	--	--	--	--	--	--	--	-	-	-	--	--	--	--	--	--	--	--	--	--	--	--	--	--	--	--	--	--	--
Unigene0000106	324	4	0.1826	--	--	--	--	--	--	--	--	--	--	--	--	--	--	--	--	--	--	--	-	-	-	--	--	--	--	--	--	--	--	--	--	--	--	--	--	--	--	--	--	--
Unigene0000107	270	13	0.7119	--	--	--	--	--	--	--	--	--	--	--	--	--	--	--	--	--	--	--	-	-	-	--	--	--	--	--	--	--	--	--	--	--	--	--	--	--	--	--	--	--
Unigene0000108	380	34	1.323	--	--	--	--	--	--	--	--	--	--	--	--	--	--	--	--	--	--	--	-	-	-	--	--	--	--	--	--	--	--	--	--	--	--	--	--	--	--	--	--	--
Unigene0000109	774	103	1.9677	gi|778694747|ref|XP_011653859.1|	180	2e-49	PREDICTED: phosphatidylinositol 4-phosphate 5-kinase 5-like [Cucumis sativus]	sp|Q9M1K2|PI5K4_ARATH	129	3e-32	Phosphatidylinositol 4-phosphate 5-kinase 4 OS=Arabidopsis thaliana GN=PIP5K4 PE=3 SV=1	At3g56960	129	5e-33	KOG0229	Phosphatidylinositol-4-phosphate 5-kinase	K00889//1-phosphatidylinositol-4-phosphate 5-kinase [EC:2.7.1.68]	6e-50	180	csv:101208080	ko04144//Endocytosis//Transport and catabolism//Cellular Processes;ko00562//Inositol phosphate metabolism//Carbohydrate metabolism//Metabolism;ko04070//Phosphatidylinositol signaling system//Signal transduction//Environmental Information Processing	GO:0008152//metabolic process;GO:0016043//cellular component organization;GO:0044710//single-organism metabolic process;GO:0071704//organic substance metabolic process;GO:0044238//primary metabolic process;GO:0006650//glycerophospholipid metabolic process;GO:0046486//glycerolipid metabolic process;GO:0044699//single-organism process;GO:0032501//multicellular organismal process;GO:0009987//cellula…	GO:0005488//binding;GO:0016301//kinase activity;GO:0001883//purine nucleoside binding;GO:0016307//phosphatidylinositol phosphate kinase activity;GO:0016773//phosphotransferase activity, alcohol group as acceptor;GO:0097367//carbohydrate derivative binding;GO:0036094//small molecule binding;GO:0016772//transferase activity, transferring phosphorus-containing groups;GO:0001882//nucleoside binding;G…	GO:0005623//cell;GO:0044464//cell part	72	94	MORN	Repeat	25.2	7.7e-06	--	--	--	--	--	--	--	--	--	--	--	--	--
Unigene0000110	224	12	0.7921	--	--	--	--	--	--	--	--	--	--	--	--	--	--	--	--	--	--	--	-	-	-	--	--	--	--	--	--	--	--	--	--	--	--	--	--	--	--	--	--	--
Unigene0000111	731	0	0	--	--	--	--	--	--	--	--	--	--	--	--	--	--	--	--	--	--	--	-	-	-	--	--	--	--	--	--	--	--	--	--	--	--	--	--	--	--	--	--	--
Unigene0000112	732	0	0	--	--	--	--	--	--	--	--	--	--	--	--	--	--	--	--	--	--	--	-	-	-	--	--	--	--	--	--	--	--	--	--	--	--	--	--	--	--	--	--	--
Unigene0000113	1046	160	2.2618	gi|659086496|ref|XP_008443964.1|	205	7e-63	PREDICTED: U11/U12 small nuclear ribonucleoprotein 25 kDa protein-like isoform X2 [Cucumis melo]	sp|Q84WS8|U1125_ARATH	63.5	1e-10	U11/U12 small nuclear ribonucleoprotein 25 kDa protein OS=Arabidopsis thaliana GN=SNRNP25 PE=2 SV=1	--	--	--	--	--	K13153//U11/U12 small nuclear ribonucleoprotein 25 kDa protein	4e-63	204	csv:105435529	--	-	-	-	--	--	--	--	--	--	--	--	--	--	--	--	--	--	--	--	--	--	--
Unigene0000114	248	18	1.0732	--	--	--	--	--	--	--	--	--	--	--	--	--	--	--	--	--	--	--	-	-	-	--	--	--	--	--	--	--	--	--	--	--	--	--	--	--	--	--	--	--
Unigene0000115	248	12	0.7155	--	--	--	--	--	--	--	--	--	--	--	--	--	--	--	--	--	--	--	-	-	-	--	--	--	--	--	--	--	--	--	--	--	--	--	--	--	--	--	--	--
Unigene0000116	1461	225	2.2772	gi|734388140|gb|KHN25562.1|	155	3e-73	LINE-1 reverse transcriptase like [Glycine soja]	sp|P08548|LIN1_NYCCO	55.1	3e-07	LINE-1 reverse transcriptase homolog OS=Nycticebus coucang PE=3 SV=1	At3g32110	99.4	8e-47	KOG1075	FOG: Reverse transcriptase	K18577//mannosylglycoprotein endo-beta-mannosidase [EC:3.2.1.152]	1e-98	171	mdm:103414113	--	-	-	-	1	115	RVT_1	Family	43.7	1.7e-11	--	--	--	--	--	--	PRGDB00206908	LOC_Os02g02660.1	Putative_R-Genes,_predicted_from_Pythozome	Oryza sativa	CNL	2e-25	107
Unigene0000117	221	11	0.736	--	--	--	--	--	--	--	--	--	--	--	--	--	--	--	--	--	--	--	-	-	-	--	--	--	--	--	--	--	--	--	--	--	--	--	--	--	--	--	--	--
Unigene0000118	450	35	1.1501	--	--	--	--	--	--	--	--	--	--	--	--	--	--	--	--	--	--	--	-	-	-	--	--	--	--	--	--	--	--	--	--	--	--	--	--	--	--	--	--	--
Unigene0000119	576	867	22.2569	gi|590692283|ref|XP_007044016.1|	143	2e-41	Chaperone protein dnaJ-related [Theobroma cacao]	--	--	--	--	--	--	--	--	--	--	--	--	--	--	--	-	GO:0005488//binding;GO:0005515//protein binding	-	--	--	--	--	--	--	--	--	--	--	--	--	--	--	--	--	--	--	--
Unigene0000120	1048	439	6.194	gi|674959950|emb|CDX73634.1|	203	8e-60	BnaC08g23690D [Brassica napus]	sp|Q9SJ52|YLS9_ARATH	63.2	3e-10	Protein YLS9 OS=Arabidopsis thaliana GN=YLS9 PE=2 SV=1	--	--	--	--	--	--	--	--	--	--	--	-	-	-	--	--	--	--	--	--	--	--	--	--	--	--	--	--	--	--	--	--	--
Unigene0000121	289	23	1.1768	gi|38346582|emb|CAE04646.2|	126	4e-33	OSJNBa0061G20.2 [Oryza sativa Japonica Group]	sp|P92519|M810_ARATH	97.1	2e-24	Uncharacterized mitochondrial protein AtMg00810 OS=Arabidopsis thaliana GN=AtMg00810 PE=4 SV=1	At4g28900	114	1e-29	KOG0017	FOG: Transposon-encoded proteins with TYA, reverse transcriptase, integrase domains in various combinations	--	--	--	--	--	--	GO:0044237//cellular metabolic process;GO:0009987//cellular process;GO:0034641//cellular nitrogen compound metabolic process;GO:0090304//nucleic acid metabolic process;GO:0008152//metabolic process;GO:0046483//heterocycle metabolic process;GO:0006807//nitrogen compound metabolic process;GO:0006259//DNA metabolic process;GO:0043170//macromolecule metabolic process;GO:0044238//primary metabolic pro…	GO:0043169//cation binding;GO:0046914//transition metal ion binding;GO:0005488//binding;GO:0043167//ion binding;GO:0046872//metal ion binding;GO:0097159//organic cyclic compound binding	GO:0043227//membrane-bounded organelle;GO:0005622//intracellular;GO:0043229//intracellular organelle;GO:0043231//intracellular membrane-bounded organelle;GO:0044424//intracellular part;GO:0043226//organelle;GO:0044464//cell part;GO:0005623//cell	--	--	--	--	--	--	--	--	--	--	--	--	PRGDB00215907	MDP0000201899	Putative_R-Genes,_predicted_from_Pythozome	Malus x domestica	NL	8e-30	114
Unigene0000122	273	10	0.5416	--	--	--	--	--	--	--	--	--	--	--	--	--	--	--	--	--	--	--	-	-	-	--	--	--	--	--	--	--	--	--	--	--	--	--	--	--	--	--	--	--
Unigene0000123	371	45	1.7935	gi|778727756|ref|XP_011659314.1|	130	6e-37	PREDICTED: classical arabinogalactan protein 26 [Cucumis sativus]	--	--	--	--	--	--	--	--	--	--	--	--	--	--	--	-	-	-	--	--	--	--	--	--	--	--	--	--	--	--	--	--	--	--	--	--	--
Unigene0000124	424	33	1.1508	gi|24461860|gb|AAN62347.1|AF506028_14	130	1e-32	CTV.20 [Citrus trifoliata]	--	--	--	--	--	--	--	--	--	--	--	--	--	--	--	GO:0044238//primary metabolic process;GO:0043170//macromolecule metabolic process;GO:0071704//organic substance metabolic process;GO:0008152//metabolic process	GO:0043169//cation binding;GO:0046872//metal ion binding;GO:0003824//catalytic activity;GO:0043167//ion binding;GO:0005488//binding	-	--	--	--	--	--	--	--	--	--	--	--	--	--	--	--	--	--	--	--
Unigene0000125	207	10	0.7143	gi|778695665|ref|XP_011654031.1|	74.3	1e-14	PREDICTED: LOW QUALITY PROTEIN: probable LRR receptor-like serine/threonine-protein kinase At1g53440 [Cucumis sativus]	sp|C0LGG9|Y5344_ARATH	61.2	8e-11	Probable LRR receptor-like serine/threonine-protein kinase At1g53440 OS=Arabidopsis thaliana GN=At1g53440 PE=2 SV=2	--	--	--	--	--	--	--	--	--	--	--	-	GO:0016773//phosphotransferase activity, alcohol group as acceptor;GO:0003824//catalytic activity;GO:0016740//transferase activity;GO:0004672//protein kinase activity;GO:0016301//kinase activity;GO:0016772//transferase activity, transferring phosphorus-containing groups	-	--	--	--	--	--	--	--	--	--	--	--	--	--	--	--	--	--	--	--
Unigene0000126	366	32	1.2928	--	--	--	--	--	--	--	--	--	--	--	--	--	--	--	--	--	--	--	-	-	-	--	--	--	--	--	--	--	--	--	--	--	--	--	--	--	--	--	--	--
Unigene0000127	487	51	1.5485	gi|555946203|gb|AGZ19406.1|	209	1e-65	cytochrome c oxidase subunit 3 (mitochondrion) (mitochondrion) [Chlorella sp. ArM0029B]	sp|P00414|COX3_HUMAN	313	5e-107	Cytochrome c oxidase subunit 3 OS=Homo sapiens GN=MT-CO3 PE=1 SV=2	HsMi005	313	1e-107	KOG4664	Cytochrome oxidase subunit III and related proteins	K02262//cytochrome c oxidase subunit 3	4e-61	197	csl:CospCoM_p10	ko00190//Oxidative phosphorylation//Energy metabolism//Metabolism	GO:0022900//electron transport chain;GO:0044237//cellular metabolic process;GO:0055114//oxidation-reduction process;GO:0009987//cellular process;GO:0045333//cellular respiration;GO:0044710//single-organism metabolic process;GO:0022904//respiratory electron transport chain;GO:0008152//metabolic process;GO:0015980//energy derivation by oxidation of organic compounds;GO:0006091//generation of precur…	GO:0003824//catalytic activity;GO:0016491//oxidoreductase activity	GO:0043229//intracellular organelle;GO:0043226//organelle;GO:0005623//cell;GO:0044464//cell part;GO:0043227//membrane-bounded organelle;GO:0044424//intracellular part;GO:0043231//intracellular membrane-bounded organelle;GO:0005622//intracellular;GO:0016020//membrane	1	162	COX3	Family	254.1	1.3e-75	--	--	--	--	--	--	--	--	--	--	--	--	--
Unigene0000128	311	39	1.8543	gi|15231113|ref|NP_188669.1|	57.4	2e-09	paraquat downregulated protein [Arabidopsis thaliana]	--	--	--	--	--	--	--	--	--	--	--	--	--	--	--	-	-	-	--	--	--	--	--	--	--	--	--	--	--	--	--	--	--	--	--	--	--
Unigene0000129	1101	6529	87.6853	gi|659076877|ref|XP_008438910.1|	275	1e-88	PREDICTED: ethylene-responsive transcription factor RAP2-3 isoform X1 [Cucumis melo]	sp|P42736|RAP23_ARATH	146	1e-39	Ethylene-responsive transcription factor RAP2-3 OS=Arabidopsis thaliana GN=RAP2-3 PE=1 SV=2	--	--	--	--	--	K09286//EREBP-like factor	4e-89	275	cmo:103483869	--	GO:0050789//regulation of biological process;GO:0019222//regulation of metabolic process;GO:0065007//biological regulation;GO:0060255//regulation of macromolecule metabolic process;GO:0009987//cellular process;GO:0010468//regulation of gene expression	-	-	94	144	AP2	Domain	67.2	9e-19	95	158	AP2	1.3e-42	143	ERF	--	--	--	--	--	--	--
Unigene0000130	228	12	0.7782	--	--	--	--	--	--	--	--	--	--	--	--	--	--	--	--	--	--	--	-	-	-	--	--	--	--	--	--	--	--	--	--	--	--	--	--	--	--	--	--	--
Unigene0000131	278	18	0.9574	--	--	--	--	--	--	--	--	--	--	--	--	--	--	--	--	--	--	--	-	-	-	--	--	--	--	--	--	--	--	--	--	--	--	--	--	--	--	--	--	--
Unigene0000132	822	3	0.054	--	--	--	--	--	--	--	--	--	--	--	--	--	--	--	--	--	--	--	-	-	-	--	--	--	--	--	--	--	--	--	--	--	--	--	--	--	--	--	--	--
Unigene0000133	802	0	0	--	--	--	--	--	--	--	--	--	--	--	--	--	--	--	--	--	--	--	-	-	-	--	--	--	--	--	--	--	--	--	--	--	--	--	--	--	--	--	--	--
Unigene0000134	286	16	0.8272	--	--	--	--	--	--	--	--	--	--	--	--	--	--	--	--	--	--	--	-	-	-	--	--	--	--	--	--	--	--	--	--	--	--	--	--	--	--	--	--	--
Unigene0000135	219	14	0.9453	--	--	--	--	--	--	--	--	--	--	--	--	--	--	--	--	--	--	--	-	-	-	--	--	--	--	--	--	--	--	--	--	--	--	--	--	--	--	--	--	--
Unigene0000136	260	0	0	gi|659117086|ref|XP_008458414.1|	73.9	1e-15	PREDICTED: cell wall integrity and stress response component 1 isoform X1 [Cucumis melo]	--	--	--	--	--	--	--	--	--	--	--	--	--	--	--	-	-	-	35	68	DUF581	Family	43.3	1.5e-11	--	--	--	--	--	--	--	--	--	--	--	--	--
Unigene0000137	597	180	4.4583	gi|566185364|ref|XP_006380161.1|	131	7e-36	senescence-associated family protein [Populus trichocarpa]	--	--	--	--	--	--	--	--	--	--	--	--	--	--	--	-	-	-	36	85	DUF581	Family	78.4	1.6e-22	--	--	--	--	--	--	--	--	--	--	--	--	--
Unigene0000138	439	8	0.2695	gi|566185364|ref|XP_006380161.1|	75.9	2e-15	senescence-associated family protein [Populus trichocarpa]	--	--	--	--	--	--	--	--	--	--	--	--	--	--	--	-	-	-	3	26	DUF581	Family	33.6	1.5e-08	--	--	--	--	--	--	--	--	--	--	--	--	--
Unigene0000139	233	5	0.3173	--	--	--	--	--	--	--	--	--	--	--	--	--	--	--	--	--	--	--	-	-	-	--	--	--	--	--	--	--	--	--	--	--	--	--	--	--	--	--	--	--
Unigene0000140	2190	28	0.1891	gi|778671079|ref|XP_011649578.1|	1043	0	PREDICTED: probable serine/threonine-protein kinase At1g01540 [Cucumis sativus]	sp|Q3EDL4|Y1154_ARATH	612	0	Probable serine/threonine-protein kinase At1g01540 OS=Arabidopsis thaliana GN=At1g01540 PE=1 SV=2	At4g02630	641	0	KOG1187	Serine/threonine protein kinase	--	--	--	--	--	--	GO:0065009//regulation of molecular function;GO:0050790//regulation of catalytic activity;GO:0050794//regulation of cellular process;GO:0045937//positive regulation of phosphate metabolic process;GO:0001932//regulation of protein phosphorylation;GO:0051246//regulation of protein metabolic process;GO:0050896//response to stimulus;GO:0032147//activation of protein kinase activity;GO:0051247//positi…	GO:0003824//catalytic activity;GO:0032549//ribonucleoside binding;GO:0016773//phosphotransferase activity, alcohol group as acceptor;GO:0004702//receptor signaling protein serine/threonine kinase activity;GO:0060089//molecular transducer activity;GO:0004674//protein serine/threonine kinase activity;GO:0005488//binding;GO:0001883//purine nucleoside binding;GO:1901363//heterocyclic compound binding…	-	184	449	Pkinase	Domain	158.1	2e-46	181|184	450|379	S_TKc|TyrKc	9.1e-42|5.5e-45	140.5|150.7	--	--	--	--	--	--	--	--
Unigene0000141	2101	168	1.1824	gi|778671079|ref|XP_011649578.1|	1043	0	PREDICTED: probable serine/threonine-protein kinase At1g01540 [Cucumis sativus]	sp|Q3EDL4|Y1154_ARATH	612	0	Probable serine/threonine-protein kinase At1g01540 OS=Arabidopsis thaliana GN=At1g01540 PE=1 SV=2	At4g02630	641	0	KOG1187	Serine/threonine protein kinase	--	--	--	--	--	--	GO:0001934//positive regulation of protein phosphorylation;GO:0051246//regulation of protein metabolic process;GO:0032147//activation of protein kinase activity;GO:0010604//positive regulation of macromolecule metabolic process;GO:0065007//biological regulation;GO:0051174//regulation of phosphorus metabolic process;GO:0050789//regulation of biological process;GO:0051716//cellular response to stim…	GO:0036094//small molecule binding;GO:0003824//catalytic activity;GO:0097159//organic cyclic compound binding;GO:1901363//heterocyclic compound binding;GO:0097367//carbohydrate derivative binding;GO:0004871//signal transducer activity;GO:0001883//purine nucleoside binding;GO:0016772//transferase activity, transferring phosphorus-containing groups;GO:0005057//receptor signaling protein activity;GO…	-	184	449	Pkinase	Domain	158.1	2e-46	181|184	450|379	S_TKc|TyrKc	9.1e-42|5.5e-45	140.5|150.7	--	--	--	--	--	--	--	--
Unigene0000142	246	14	0.8415	--	--	--	--	--	--	--	--	--	--	--	--	--	--	--	--	--	--	--	-	-	-	--	--	--	--	--	--	--	--	--	--	--	--	--	--	--	--	--	--	--
Unigene0000143	1281	53	0.6118	gi|778676365|ref|XP_011650571.1|	832	0	PREDICTED: prolycopene isomerase, chloroplastic [Cucumis sativus]	sp|Q2VEX9|CRTSO_DAUCA	179	3e-48	Prolycopene isomerase, chloroplastic OS=Daucus carota GN=CRTISO PE=2 SV=1	At1g57770	725	0	KOG4254	Phytoene desaturase	--	--	--	--	--	--	GO:0016109//tetraterpenoid biosynthetic process;GO:1901576//organic substance biosynthetic process;GO:0044249//cellular biosynthetic process;GO:0006629//lipid metabolic process;GO:0016101//diterpenoid metabolic process;GO:0016114//terpenoid biosynthetic process;GO:0044699//single-organism process;GO:0016108//tetraterpenoid metabolic process;GO:0044711//single-organism biosynthetic process;GO:0008…	GO:0016627//oxidoreductase activity, acting on the CH-CH group of donors;GO:0016491//oxidoreductase activity;GO:0003824//catalytic activity	GO:0009536//plastid;GO:0043229//intracellular organelle;GO:0005737//cytoplasm;GO:0044424//intracellular part;GO:0043227//membrane-bounded organelle;GO:0005622//intracellular;GO:0044464//cell part;GO:0044444//cytoplasmic part;GO:0043231//intracellular membrane-bounded organelle;GO:0043226//organelle;GO:0005623//cell	139	211	DAO	Domain	26	3.5e-06	--	--	--	--	--	--	--	--	--	--	--	--	--
Unigene0000144	985	4	0.06	gi|778676365|ref|XP_011650571.1|	634	0	PREDICTED: prolycopene isomerase, chloroplastic [Cucumis sativus]	sp|Q2VEX9|CRTSO_DAUCA	117	9e-28	Prolycopene isomerase, chloroplastic OS=Daucus carota GN=CRTISO PE=2 SV=1	At1g57770	536	0	KOG4254	Phytoene desaturase	--	--	--	--	--	--	GO:0044255//cellular lipid metabolic process;GO:0016109//tetraterpenoid biosynthetic process;GO:0044699//single-organism process;GO:0044710//single-organism metabolic process;GO:0044238//primary metabolic process;GO:0016114//terpenoid biosynthetic process;GO:0006629//lipid metabolic process;GO:0044763//single-organism cellular process;GO:1901576//organic substance biosynthetic process;GO:0071704/…	GO:0016627//oxidoreductase activity, acting on the CH-CH group of donors;GO:0016491//oxidoreductase activity;GO:0003824//catalytic activity	GO:0005622//intracellular;GO:0043229//intracellular organelle;GO:0005623//cell;GO:0043231//intracellular membrane-bounded organelle;GO:0044444//cytoplasmic part;GO:0043226//organelle;GO:0009536//plastid;GO:0043227//membrane-bounded organelle;GO:0044424//intracellular part;GO:0044464//cell part;GO:0005737//cytoplasm	139	205	DAO	Domain	26.4	2.6e-06	--	--	--	--	--	--	--	--	--	--	--	--	--
Unigene0000145	668	217	4.8034	gi|674952380|emb|CDX80834.1|	129	7e-35	BnaC03g00880D [Brassica napus]	--	--	--	--	--	--	--	--	--	--	--	--	--	--	--	-	-	-	--	--	--	--	--	--	--	--	--	--	--	--	--	--	--	--	--	--	--
Unigene0000146	432	33	1.1295	gi|659068956|ref|XP_008447453.1|	242	4e-73	PREDICTED: probable GPI-anchored adhesin-like protein PGA55 isoform X1 [Cucumis melo]	--	--	--	--	--	--	--	--	--	--	--	--	--	--	--	-	-	-	51	78	VARLMGL	Domain	26.9	1.7e-06	--	--	--	--	--	--	--	--	--	--	--	--	--
Unigene0000147	829	0	0	gi|659118707|ref|XP_008459261.1|	468	5e-163	PREDICTED: 4-hydroxy-3-methylbut-2-enyl diphosphate reductase, chloroplastic-like isoform X2 [Cucumis melo]	sp|Q94B35|ISPH_ARATH	391	5e-133	4-hydroxy-3-methylbut-2-enyl diphosphate reductase, chloroplastic OS=Arabidopsis thaliana GN=ISPH PE=2 SV=1	--	--	--	--	--	K03527//4-hydroxy-3-methylbut-2-enyl diphosphate reductase [EC:1.17.1.2]	3e-162	467	cmo:103498435	ko00900//Terpenoid backbone biosynthesis//Metabolism of terpenoids and polyketides//Metabolism	GO:0008152//metabolic process;GO:0044281//small molecule metabolic process;GO:0044237//cellular metabolic process;GO:0044710//single-organism metabolic process;GO:0044238//primary metabolic process;GO:0044249//cellular biosynthetic process;GO:0009058//biosynthetic process;GO:0044255//cellular lipid metabolic process;GO:0090407//organophosphate biosynthetic process;GO:0006082//organic acid metabol…	GO:0016726//oxidoreductase activity, acting on CH or CH2 groups, NAD or NADP as acceptor;GO:0043169//cation binding;GO:0016491//oxidoreductase activity;GO:0016725//oxidoreductase activity, acting on CH or CH2 groups;GO:0003824//catalytic activity;GO:0043167//ion binding;GO:0005488//binding	-	110	261	LYTB	Family	157.9	2.2e-46	--	--	--	--	--	--	--	--	--	--	--	--	--
Unigene0000148	1322	0	0	gi|449455318|ref|XP_004145400.1|	785	0	PREDICTED: 4-hydroxy-3-methylbut-2-enyl diphosphate reductase, chloroplastic-like isoform X1 [Cucumis sativus]	sp|Q94B35|ISPH_ARATH	677	0	4-hydroxy-3-methylbut-2-enyl diphosphate reductase, chloroplastic OS=Arabidopsis thaliana GN=ISPH PE=2 SV=1	--	--	--	--	--	K03527//4-hydroxy-3-methylbut-2-enyl diphosphate reductase [EC:1.17.1.2]	0	785	csv:101205824	ko00900//Terpenoid backbone biosynthesis//Metabolism of terpenoids and polyketides//Metabolism	GO:0032787//monocarboxylic acid metabolic process;GO:0008654//phospholipid biosynthetic process;GO:0009058//biosynthetic process;GO:0044249//cellular biosynthetic process;GO:0006796//phosphate-containing compound metabolic process;GO:0019637//organophosphate metabolic process;GO:0044237//cellular metabolic process;GO:0006793//phosphorus metabolic process;GO:0044238//primary metabolic process;GO:0…	GO:0016726//oxidoreductase activity, acting on CH or CH2 groups, NAD or NADP as acceptor;GO:0043167//ion binding;GO:0016491//oxidoreductase activity;GO:0003824//catalytic activity;GO:0043169//cation binding;GO:0016725//oxidoreductase activity, acting on CH or CH2 groups;GO:0005488//binding	-	110	437	LYTB	Family	283.8	8.9e-85	--	--	--	--	--	--	--	--	--	--	--	--	--
Unigene0000149	1322	0	0	gi|449455318|ref|XP_004145400.1|	781	0	PREDICTED: 4-hydroxy-3-methylbut-2-enyl diphosphate reductase, chloroplastic-like isoform X1 [Cucumis sativus]	sp|Q94B35|ISPH_ARATH	676	0	4-hydroxy-3-methylbut-2-enyl diphosphate reductase, chloroplastic OS=Arabidopsis thaliana GN=ISPH PE=2 SV=1	--	--	--	--	--	K03527//4-hydroxy-3-methylbut-2-enyl diphosphate reductase [EC:1.17.1.2]	0	781	csv:101205824	ko00900//Terpenoid backbone biosynthesis//Metabolism of terpenoids and polyketides//Metabolism	GO:0006629//lipid metabolic process;GO:0006796//phosphate-containing compound metabolic process;GO:0044237//cellular metabolic process;GO:0090407//organophosphate biosynthetic process;GO:0044281//small molecule metabolic process;GO:0044710//single-organism metabolic process;GO:0008152//metabolic process;GO:0009987//cellular process;GO:0019637//organophosphate metabolic process;GO:0006090//pyruvat…	GO:0016726//oxidoreductase activity, acting on CH or CH2 groups, NAD or NADP as acceptor;GO:0016491//oxidoreductase activity;GO:0003824//catalytic activity;GO:0043169//cation binding;GO:0005488//binding;GO:0043167//ion binding;GO:0016725//oxidoreductase activity, acting on CH or CH2 groups	-	110	437	LYTB	Family	283.8	9e-85	--	--	--	--	--	--	--	--	--	--	--	--	--
Unigene0000150	991	157	2.3426	gi|307136200|gb|ADN34038.1|	366	4e-124	DNA binding protein [Cucumis melo subsp. melo]	--	--	--	--	--	--	--	--	--	--	--	--	--	--	--	-	-	-	--	--	--	--	--	--	--	--	--	--	--	--	--	--	--	--	--	--	--
Unigene0000151	235	7	0.4405	gi|449462369|ref|XP_004148913.1|	126	1e-35	PREDICTED: psbQ-like protein 3, chloroplastic [Cucumis sativus]	--	--	--	--	--	--	--	--	--	--	--	--	--	--	--	GO:0008152//metabolic process;GO:0044237//cellular metabolic process;GO:0009987//cellular process	GO:0043169//cation binding;GO:0043167//ion binding;GO:0046872//metal ion binding;GO:0005488//binding	GO:0009521//photosystem;GO:0009507//chloroplast;GO:0044424//intracellular part;GO:0005622//intracellular;GO:0043234//protein complex;GO:0005737//cytoplasm;GO:0043231//intracellular membrane-bounded organelle;GO:0016020//membrane;GO:0044436//thylakoid part;GO:0034357//photosynthetic membrane;GO:0032991//macromolecular complex;GO:0009536//plastid;GO:0044444//cytoplasmic part;GO:0043226//organelle;G…	--	--	--	--	--	--	--	--	--	--	--	--	--	--	--	--	--	--	--
Unigene0000152	349	6	0.2542	gi|449452332|ref|XP_004143913.1|	120	1e-32	PREDICTED: probable glutathione peroxidase 8 [Cucumis sativus]	sp|Q9LEF0|GPX4_MESCR	103	7e-27	Probable phospholipid hydroperoxide glutathione peroxidase OS=Mesembryanthemum crystallinum GN=GPXMC1 PE=2 SV=1	At4g11600	101	4e-27	KOG1651	Glutathione peroxidase	K00432//glutathione peroxidase [EC:1.11.1.9]	4e-33	120	csv:101220211	ko00480//Glutathione metabolism//Metabolism of other amino acids//Metabolism;ko00590//Arachidonic acid metabolism//Lipid metabolism//Metabolism	GO:0009404//toxin metabolic process;GO:0044237//cellular metabolic process;GO:0008152//metabolic process;GO:0044710//single-organism metabolic process;GO:0044763//single-organism cellular process;GO:0050896//response to stimulus;GO:0044699//single-organism process;GO:0009987//cellular process;GO:0006950//response to stress;GO:0019748//secondary metabolic process	GO:0043167//ion binding;GO:0016209//antioxidant activity;GO:0003824//catalytic activity;GO:0043169//cation binding;GO:0005488//binding;GO:0016491//oxidoreductase activity;GO:0016684//oxidoreductase activity, acting on peroxide as acceptor;GO:0004601//peroxidase activity	GO:0044464//cell part;GO:0005623//cell;GO:0005622//intracellular;GO:0044444//cytoplasmic part;GO:0043231//intracellular membrane-bounded organelle;GO:0043226//organelle;GO:0043227//membrane-bounded organelle;GO:0044424//intracellular part;GO:0043229//intracellular organelle;GO:0005737//cytoplasm	12	63	GSHPx	Family	63.6	8e-18	--	--	--	--	--	--	--	--	--	--	--	--	--
Unigene0000153	913	650	10.5271	gi|659073791|ref|XP_008437255.1|	326	3e-110	PREDICTED: probable glutathione peroxidase 8 [Cucumis melo]	sp|Q8LBU2|GPX8_ARATH	275	3e-91	Probable glutathione peroxidase 8 OS=Arabidopsis thaliana GN=GPX8 PE=2 SV=1	At1g63460	275	5e-92	KOG1651	Glutathione peroxidase	K00432//glutathione peroxidase [EC:1.11.1.9]	1e-110	326	cmo:103482739	ko00480//Glutathione metabolism//Metabolism of other amino acids//Metabolism;ko00590//Arachidonic acid metabolism//Lipid metabolism//Metabolism	GO:0006950//response to stress;GO:0044763//single-organism cellular process;GO:0019748//secondary metabolic process;GO:0009987//cellular process;GO:0050896//response to stimulus;GO:0008152//metabolic process;GO:0044237//cellular metabolic process;GO:0044699//single-organism process;GO:0044710//single-organism metabolic process;GO:0009404//toxin metabolic process	GO:0005488//binding;GO:0016209//antioxidant activity;GO:0004601//peroxidase activity;GO:0016491//oxidoreductase activity;GO:0003824//catalytic activity;GO:0043169//cation binding;GO:0043167//ion binding;GO:0016684//oxidoreductase activity, acting on peroxide as acceptor	GO:0005737//cytoplasm;GO:0044444//cytoplasmic part;GO:0005622//intracellular;GO:0043227//membrane-bounded organelle;GO:0005623//cell;GO:0044464//cell part;GO:0043226//organelle;GO:0043229//intracellular organelle;GO:0044424//intracellular part;GO:0043231//intracellular membrane-bounded organelle	12	120	GSHPx	Family	154.5	4.6e-46	--	--	--	--	--	--	--	--	--	--	--	--	--
Unigene0000154	223	17	1.1272	gi|727450642|ref|XP_010506987.1|	82.8	9e-18	PREDICTED: UDP-glycosyltransferase 91A1-like [Camelina sativa]	sp|Q940V3|U91A1_ARATH	79	3e-17	UDP-glycosyltransferase 91A1 OS=Arabidopsis thaliana GN=UGT91A1 PE=2 SV=1	At2g22590	79	5e-18	KOG1192	UDP-glucuronosyl and UDP-glucosyl transferase	--	--	--	--	--	--	-	GO:0016740//transferase activity;GO:0003824//catalytic activity;GO:0016757//transferase activity, transferring glycosyl groups	-	--	--	--	--	--	--	--	--	--	--	--	--	--	--	--	--	--	--	--
Unigene0000155	290	11	0.5609	gi|590724152|ref|XP_007052385.1|	164	4e-48	Nucleotide-diphospho-sugar transferase family protein [Theobroma cacao]	sp|Q54RP0|AGTA_DICDI	58.2	2e-09	UDP-galactose:fucoside alpha-3-galactosyltransferase OS=Dictyostelium discoideum GN=agtA PE=1 SV=1	--	--	--	--	--	--	--	--	--	--	--	-	GO:0003824//catalytic activity	-	2	91	Nucleotid_trans	Family	105.4	3.1e-30	--	--	--	--	--	--	--	--	--	--	--	--	--
Unigene0000156	283	292	15.2568	--	--	--	--	--	--	--	--	--	--	--	--	--	--	--	--	--	--	--	-	-	-	--	--	--	--	--	--	--	--	--	--	--	--	--	--	--	--	--	--	--
Unigene0000157	1536	1581	15.2198	gi|449440089|ref|XP_004137817.1|	625	0	PREDICTED: probable E3 ubiquitin-protein ligase LOG2 [Cucumis sativus]	sp|Q9S752|LOFG2_ARATH	377	1e-124	Probable E3 ubiquitin-protein ligase LOG2 OS=Arabidopsis thaliana GN=LOG2 PE=1 SV=1	At3g09770	377	2e-125	KOG4265	Predicted E3 ubiquitin ligase	--	--	--	--	--	--	-	GO:0046914//transition metal ion binding;GO:0046872//metal ion binding;GO:0005488//binding;GO:0043169//cation binding;GO:0043167//ion binding	-	309	355	zf-C3HC4_3	Domain	59.3	1.9e-16	--	--	--	--	--	--	--	--	--	--	--	--	--
Unigene0000158	1405	10	0.1052	gi|449440089|ref|XP_004137817.1|	545	0	PREDICTED: probable E3 ubiquitin-protein ligase LOG2 [Cucumis sativus]	sp|Q9S752|LOFG2_ARATH	309	4e-99	Probable E3 ubiquitin-protein ligase LOG2 OS=Arabidopsis thaliana GN=LOG2 PE=1 SV=1	At3g09770	309	7e-100	KOG4265	Predicted E3 ubiquitin ligase	--	--	--	--	--	--	-	GO:0043167//ion binding;GO:0046914//transition metal ion binding;GO:0005488//binding;GO:0046872//metal ion binding;GO:0043169//cation binding	-	--	--	--	--	--	--	--	--	--	--	--	--	--	--	--	--	--	--	--
Unigene0000159	252	24	1.4082	gi|470126267|ref|XP_004299111.1|	104	3e-26	PREDICTED: late embryogenesis abundant protein D-34-like [Fragaria vesca subsp. vesca]	sp|P09444|LEA34_GOSHI	100	2e-25	Late embryogenesis abundant protein D-34 OS=Gossypium hirsutum PE=4 SV=1	--	--	--	--	--	--	--	--	--	--	--	-	-	-	1	57	SMP	Family	74.5	4.2e-21	--	--	--	--	--	--	--	--	--	--	--	--	--
Unigene0000160	390	37	1.4028	gi|659113506|ref|XP_008456610.1|	252	1e-78	PREDICTED: pentatricopeptide repeat-containing protein At5g04780 [Cucumis melo]	sp|Q9LZ19|PP364_ARATH	179	2e-52	Pentatricopeptide repeat-containing protein At5g04780 OS=Arabidopsis thaliana GN=PCMP-H16 PE=2 SV=2	At5g04780_1	180	2e-53	KOG4197	FOG: PPR repeat	--	--	--	--	--	--	-	GO:0016462//pyrophosphatase activity;GO:0016887//ATPase activity;GO:0042623//ATPase activity, coupled;GO:0016787//hydrolase activity;GO:0016818//hydrolase activity, acting on acid anhydrides, in phosphorus-containing anhydrides;GO:0003824//catalytic activity;GO:0016817//hydrolase activity, acting on acid anhydrides;GO:0017111//nucleoside-triphosphatase activity	-	--	--	--	--	--	--	--	--	--	--	--	--	PRGDB00183352	GSVIVT01015461001	Putative_R-Genes,_predicted_from_Pythozome	Vitis vinifera	N	4e-31	121
Unigene0000161	218	19	1.2887	gi|700197980|gb|KGN53138.1|	60.8	2e-11	hypothetical protein Csa_4G022250 [Cucumis sativus]	--	--	--	--	--	--	--	--	--	--	--	--	--	--	--	-	-	-	--	--	--	--	--	--	--	--	--	--	--	--	--	--	--	--	--	--	--
Unigene0000162	210	6	0.4225	--	--	--	--	--	--	--	--	--	--	--	--	--	--	--	--	--	--	--	-	-	-	--	--	--	--	--	--	--	--	--	--	--	--	--	--	--	--	--	--	--
Unigene0000163	551	417	11.1906	gi|27529048|emb|CAD45559.1|	84.7	7e-19	thylakoid soluble phosphoprotein [Spinacia oleracea]	--	--	--	--	--	--	--	--	--	--	--	--	--	--	--	GO:0051179//localization;GO:0006812//cation transport;GO:0051234//establishment of localization;GO:0006725//cellular aromatic compound metabolic process;GO:0043170//macromolecule metabolic process;GO:1902578//single-organism localization;GO:0050801//ion homeostasis;GO:0006811//ion transport;GO:0009628//response to abiotic stimulus;GO:0044237//cellular metabolic process;GO:0009314//response to rad…	-	GO:0043231//intracellular membrane-bounded organelle;GO:0005622//intracellular;GO:0044444//cytoplasmic part;GO:0043229//intracellular organelle;GO:0031984//organelle subcompartment;GO:0031976//plastid thylakoid;GO:0009507//chloroplast;GO:0044424//intracellular part;GO:0009526//plastid envelope;GO:0043227//membrane-bounded organelle;GO:0005737//cytoplasm;GO:0044464//cell part;GO:0043226//organelle…	20	93	TSP9	Family	59.4	3.5e-16	--	--	--	--	--	--	--	--	--	--	--	--	--
Unigene0000164	501	0	0	--	--	--	--	--	--	--	--	--	--	--	--	--	--	--	--	--	--	--	-	-	-	--	--	--	--	--	--	--	--	--	--	--	--	--	--	--	--	--	--	--
Unigene0000165	503	0	0	--	--	--	--	--	--	--	--	--	--	--	--	--	--	--	--	--	--	--	-	-	-	--	--	--	--	--	--	--	--	--	--	--	--	--	--	--	--	--	--	--
Unigene0000166	344	29	1.2465	--	--	--	--	--	--	--	--	--	--	--	--	--	--	--	--	--	--	--	-	-	-	--	--	--	--	--	--	--	--	--	--	--	--	--	--	--	--	--	--	--
Unigene0000167	452	141	4.6126	gi|566171497|ref|XP_006383400.1|	74.7	3e-15	glycine-rich family protein [Populus trichocarpa]	--	--	--	--	--	--	--	--	--	--	--	--	--	--	--	-	-	GO:0044425//membrane part;GO:0031224//intrinsic component of membrane;GO:0016020//membrane	--	--	--	--	--	--	--	--	--	--	--	--	--	--	--	--	--	--	--
Unigene0000168	613	46	1.1096	gi|568872421|ref|XP_006489370.1|	234	1e-69	PREDICTED: G-type lectin S-receptor-like serine/threonine-protein kinase RLK1-like [Citrus sinensis]	sp|Q39202|RLK1_ARATH	61.6	7e-10	G-type lectin S-receptor-like serine/threonine-protein kinase RLK1 OS=Arabidopsis thaliana GN=RLK1 PE=2 SV=2	--	--	--	--	--	--	--	--	--	--	--	GO:0006464//cellular protein modification process;GO:0009987//cellular process;GO:0043412//macromolecule modification;GO:0043170//macromolecule metabolic process;GO:0044267//cellular protein metabolic process;GO:0019538//protein metabolic process;GO:0044237//cellular metabolic process;GO:0006796//phosphate-containing compound metabolic process;GO:0008152//metabolic process;GO:0006793//phosphorus …	GO:0016740//transferase activity;GO:0016773//phosphotransferase activity, alcohol group as acceptor;GO:1901363//heterocyclic compound binding;GO:0016301//kinase activity;GO:0005488//binding;GO:0004672//protein kinase activity;GO:0003824//catalytic activity;GO:0036094//small molecule binding;GO:0097159//organic cyclic compound binding;GO:0016772//transferase activity, transferring phosphorus-conta…	-	7	72	S_locus_glycop	Family	36.8	3.3e-09	--	--	--	--	--	--	--	--	--	--	--	--	--
Unigene0000169	1312	2639	29.7422	gi|823184941|ref|XP_012489364.1|	481	3e-167	PREDICTED: HAUS augmin-like complex subunit 1 [Gossypium raimondii]	sp|Q96CS2|HAUS1_HUMAN	99	5e-22	HAUS augmin-like complex subunit 1 OS=Homo sapiens GN=HAUS1 PE=1 SV=1	--	--	--	--	--	K16584//HAUS augmin-like complex subunit 1	0	578	cmo:103495806	--	GO:0044763//single-organism cellular process;GO:0071822//protein complex subunit organization;GO:0016043//cellular component organization;GO:0009987//cellular process;GO:0007010//cytoskeleton organization;GO:0022607//cellular component assembly;GO:0000226//microtubule cytoskeleton organization;GO:0065003//macromolecular complex assembly;GO:0044699//single-organism process;GO:0007017//microtubule-…	-	GO:0044464//cell part;GO:0044424//intracellular part;GO:0005875//microtubule associated complex;GO:0043234//protein complex;GO:0044430//cytoskeletal part;GO:0043226//organelle;GO:0015630//microtubule cytoskeleton;GO:0005856//cytoskeleton;GO:0043229//intracellular organelle;GO:0032991//macromolecular complex;GO:0043232//intracellular non-membrane-bounded organelle;GO:0044422//organelle part;GO:000…	--	--	--	--	--	--	--	--	--	--	--	--	--	--	--	--	--	--	--
Unigene0000170	373	30	1.1893	--	--	--	--	--	--	--	--	--	--	--	--	--	--	--	--	--	--	--	-	-	-	--	--	--	--	--	--	--	--	--	--	--	--	--	--	--	--	--	--	--
Unigene0000171	790	453	8.4789	gi|700193478|gb|KGN48682.1|	164	1e-48	hypothetical protein Csa_6G497320 [Cucumis sativus]	--	--	--	--	--	--	--	--	--	--	--	--	--	--	--	-	-	-	--	--	--	--	--	--	--	--	--	--	--	--	--	--	--	--	--	--	--
Unigene0000172	242	12	0.7332	--	--	--	--	--	--	--	--	--	--	--	--	--	--	--	--	--	--	--	-	-	-	--	--	--	--	--	--	--	--	--	--	--	--	--	--	--	--	--	--	--
Unigene0000173	381	22	0.8538	gi|659116911|ref|XP_008458325.1|	229	1e-69	PREDICTED: pentatricopeptide repeat-containing protein At3g48810 [Cucumis melo]	sp|Q9M302|PP270_ARATH	153	7e-43	Pentatricopeptide repeat-containing protein At3g48810 OS=Arabidopsis thaliana GN=At3g48810 PE=2 SV=1	At3g48810	153	1e-43	KOG4197	FOG: PPR repeat	--	--	--	--	--	--	-	-	-	2|64	41|113	PPR_2|PPR_2	Repeat|Repeat	35.2|70.3	8.1e-09|8.4e-20	--	--	--	--	--	--	--	--	--	--	--	--	--
Unigene0000174	315	33	1.5491	--	--	--	--	--	--	--	--	--	--	--	--	--	--	--	--	--	--	--	-	-	-	--	--	--	--	--	--	--	--	--	--	--	--	--	--	--	--	--	--	--
Unigene0000175	303	25	1.22	--	--	--	--	--	--	--	--	--	--	--	--	--	--	--	--	--	--	--	-	-	-	--	--	--	--	--	--	--	--	--	--	--	--	--	--	--	--	--	--	--
Unigene0000176	750	102	2.011	gi|449464712|ref|XP_004150073.1|	458	1e-153	PREDICTED: beta-galactosidase 5 [Cucumis sativus]	sp|Q9SCV9|BGAL3_ARATH	326	7e-104	Beta-galactosidase 3 OS=Arabidopsis thaliana GN=BGAL3 PE=1 SV=1	At4g36360	327	9e-105	KOG0496	Beta-galactosidase	--	--	--	--	--	--	GO:0050793//regulation of developmental process;GO:0006576//cellular biogenic amine metabolic process;GO:0042546//cell wall biogenesis;GO:0071704//organic substance metabolic process;GO:0071555//cell wall organization;GO:0044085//cellular component biogenesis;GO:0065007//biological regulation;GO:0009308//amine metabolic process;GO:2000026//regulation of multicellular organismal development;GO:190…	GO:0005488//binding;GO:0004553//hydrolase activity, hydrolyzing O-glycosyl compounds;GO:0016787//hydrolase activity;GO:0003824//catalytic activity;GO:0016798//hydrolase activity, acting on glycosyl bonds;GO:0015925//galactosidase activity	GO:0005576//extracellular region	--	--	--	--	--	--	--	--	--	--	--	--	--	--	--	--	--	--	--
Unigene0000177	711	67	1.3934	gi|659122154|ref|XP_008460995.1|	426	1e-141	PREDICTED: beta-galactosidase 5-like [Cucumis melo]	sp|Q9SCV9|BGAL3_ARATH	352	5e-114	Beta-galactosidase 3 OS=Arabidopsis thaliana GN=BGAL3 PE=1 SV=1	At4g36360	352	8e-115	KOG0496	Beta-galactosidase	--	--	--	--	--	--	GO:0008152//metabolic process;GO:0006807//nitrogen compound metabolic process;GO:2000026//regulation of multicellular organismal development;GO:0006576//cellular biogenic amine metabolic process;GO:0016043//cellular component organization;GO:0009987//cellular process;GO:0044085//cellular component biogenesis;GO:1901564//organonitrogen compound metabolic process;GO:0006595//polyamine metabolic pro…	GO:0003824//catalytic activity;GO:0004553//hydrolase activity, hydrolyzing O-glycosyl compounds;GO:0016787//hydrolase activity;GO:0016798//hydrolase activity, acting on glycosyl bonds;GO:0015925//galactosidase activity;GO:0005488//binding	GO:0005576//extracellular region	4	57	Glyco_hydro_35	Family	73.2	2e-20	--	--	--	--	--	--	--	--	--	--	--	--	--
Unigene0000178	805	1096	20.1318	gi|590616636|ref|XP_007023562.1|	171	2e-50	Mitochondrial import inner membrane translocase subunit tim-10 isoform 1 [Theobroma cacao]	--	--	--	--	--	--	--	--	--	--	--	--	--	--	--	GO:0048869//cellular developmental process;GO:0051252//regulation of RNA metabolic process;GO:1903506//regulation of nucleic acid-templated transcription;GO:0009653//anatomical structure morphogenesis;GO:0044707//single-multicellular organism process;GO:0019219//regulation of nucleobase-containing compound metabolic process;GO:0044699//single-organism process;GO:0048513//organ development;GO:0007…	-	-	--	--	--	--	--	--	--	--	--	--	--	--	--	--	--	--	--	--	--
Unigene0000179	214	7	0.4837	gi|307135777|gb|ADN33669.1|	68.2	2e-12	ty3-gypsy retroelement transposase [Cucumis melo subsp. melo]	--	--	--	--	At2g06170	45.1	3e-06	KOG0017	FOG: Transposon-encoded proteins with TYA, reverse transcriptase, integrase domains in various combinations	--	--	--	--	--	--	-	-	-	--	--	--	--	--	--	--	--	--	--	--	--	--	--	--	--	--	--	--
Unigene0000180	528	64	1.7923	gi|778660481|ref|XP_011656305.1|	107	1e-24	PREDICTED: LOW QUALITY PROTEIN: protein SUPPRESSOR OF npr1-1, CONSTITUTIVE 1-like [Cucumis sativus]	--	--	--	--	--	--	--	--	--	--	--	--	--	--	--	GO:0050794//regulation of cellular process;GO:0050789//regulation of biological process;GO:0065007//biological regulation	GO:0001882//nucleoside binding;GO:0032549//ribonucleoside binding;GO:0036094//small molecule binding;GO:0097159//organic cyclic compound binding;GO:0005488//binding;GO:0097367//carbohydrate derivative binding;GO:1901363//heterocyclic compound binding;GO:0032550//purine ribonucleoside binding;GO:0001883//purine nucleoside binding	-	2|19	17|39	LRR_1|LRR_7	Repeat|Repeat	13.2|9.9	0.061|0.87	--	--	--	--	--	--	PRGDB00151884	Cucsa.292710.1	Putative_R-Genes,_predicted_from_Pythozome	Pennisetum glaucum	NL	2e-27	107
Unigene0000181	565	40	1.0468	gi|215692846|dbj|BAG88182.1|	140	1e-40	unnamed protein product [Oryza sativa Japonica Group]	--	--	--	--	--	--	--	--	--	--	--	--	--	--	--	-	-	-	--	--	--	--	--	--	--	--	--	--	--	--	--	--	--	--	--	--	--
Unigene0000182	2371	6	0.0374	gi|778707893|ref|XP_011656082.1|	1445	0	PREDICTED: bifunctional aspartokinase/homoserine dehydrogenase 1, chloroplastic [Cucumis sativus]	sp|O81852|AKH2_ARATH	1136	0	Bifunctional aspartokinase/homoserine dehydrogenase 2, chloroplastic OS=Arabidopsis thaliana GN=AKHSDH2 PE=1 SV=1	At5g14060	186	3e-50	KOG0456	Aspartate kinase	K12524//bifunctional aspartokinase / homoserine dehydrogenase 1 [EC:2.7.2.4 1.1.1.3]	0	1445	csv:101202843	ko01230//Biosynthesis of amino acids//Global and Overview//Metabolism;ko00270//Cysteine and methionine metabolism//Amino acid metabolism//Metabolism;ko00260//Glycine, serine and threonine metabolism//Amino acid metabolism//Metabolism;ko00300//Lysine biosynthesis//Amino acid metabolism//Metabolism;ko00261//Monobactam biosynthesis//Biosynthesis of other secondary metabolites//Metabolism	GO:0006807//nitrogen compound metabolic process;GO:0006520//cellular amino acid metabolic process;GO:0044699//single-organism process;GO:0019752//carboxylic acid metabolic process;GO:0043436//oxoacid metabolic process;GO:0044281//small molecule metabolic process;GO:0006793//phosphorus metabolic process;GO:0044238//primary metabolic process;GO:0044763//single-organism cellular process;GO:0044237//…	GO:0016491//oxidoreductase activity;GO:1901363//heterocyclic compound binding;GO:0003824//catalytic activity;GO:0000166//nucleotide binding;GO:0016774//phosphotransferase activity, carboxyl group as acceptor;GO:0016616//oxidoreductase activity, acting on the CH-OH group of donors, NAD or NADP as acceptor;GO:0016740//transferase activity;GO:0016772//transferase activity, transferring phosphorus-co…	GO:0044444//cytoplasmic part;GO:0043229//intracellular organelle;GO:0043226//organelle;GO:0005622//intracellular;GO:0005623//cell;GO:0043227//membrane-bounded organelle;GO:0044424//intracellular part;GO:0009536//plastid;GO:0005737//cytoplasm;GO:0043231//intracellular membrane-bounded organelle;GO:0044464//cell part	91|416|497|565	372|471|552|701	AA_kinase|ACT|ACT|NAD_binding_3	Family|Domain|Domain|Domain	153.9|41.8|41.5|90.9	4.6e-45|4.5e-11|5.9e-11|6.4e-26	--	--	--	--	--	--	--	--	--	--	--	--	--
Unigene0000183	3006	3366	16.5574	gi|778707893|ref|XP_011656082.1|	1816	0	PREDICTED: bifunctional aspartokinase/homoserine dehydrogenase 1, chloroplastic [Cucumis sativus]	sp|O81852|AKH2_ARATH	1451	0	Bifunctional aspartokinase/homoserine dehydrogenase 2, chloroplastic OS=Arabidopsis thaliana GN=AKHSDH2 PE=1 SV=1	SPBC776.03	286	3e-86	KOG0455	Homoserine dehydrogenase	K12524//bifunctional aspartokinase / homoserine dehydrogenase 1 [EC:2.7.2.4 1.1.1.3]	0	1816	csv:101202843	ko01230//Biosynthesis of amino acids//Global and Overview//Metabolism;ko00270//Cysteine and methionine metabolism//Amino acid metabolism//Metabolism;ko00260//Glycine, serine and threonine metabolism//Amino acid metabolism//Metabolism;ko00300//Lysine biosynthesis//Amino acid metabolism//Metabolism;ko00261//Monobactam biosynthesis//Biosynthesis of other secondary metabolites//Metabolism	GO:0044710//single-organism metabolic process;GO:0008152//metabolic process;GO:0044699//single-organism process;GO:0009987//cellular process;GO:1901564//organonitrogen compound metabolic process;GO:0006520//cellular amino acid metabolic process;GO:0044281//small molecule metabolic process;GO:0019752//carboxylic acid metabolic process;GO:0071704//organic substance metabolic process;GO:0006796//pho…	GO:0036094//small molecule binding;GO:0016614//oxidoreductase activity, acting on CH-OH group of donors;GO:0003824//catalytic activity;GO:0000166//nucleotide binding;GO:0043167//ion binding;GO:0016491//oxidoreductase activity;GO:1901363//heterocyclic compound binding;GO:0043177//organic acid binding;GO:0016772//transferase activity, transferring phosphorus-containing groups;GO:0043168//anion bind…	GO:0005623//cell;GO:0043226//organelle;GO:0005737//cytoplasm;GO:0043229//intracellular organelle;GO:0043227//membrane-bounded organelle;GO:0044424//intracellular part;GO:0044444//cytoplasmic part;GO:0009536//plastid;GO:0005622//intracellular;GO:0044464//cell part;GO:0043231//intracellular membrane-bounded organelle	91|416|497|565|709	372|471|552|701|907	AA_kinase|ACT|ACT|NAD_binding_3|Homoserine_dh	Family|Domain|Domain|Domain|Domain	153.2|41.4|41.1|90.4|188.1	7.4e-45|6e-11|7.8e-11|9e-26|9.7e-56	--	--	--	--	--	--	--	--	--	--	--	--	--
Unigene0000184	255	13	0.7538	--	--	--	--	--	--	--	--	--	--	--	--	--	--	--	--	--	--	--	-	-	-	--	--	--	--	--	--	--	--	--	--	--	--	--	--	--	--	--	--	--
Unigene0000185	265	9	0.5022	gi|731340503|ref|XP_010681428.1|	49.7	1e-06	PREDICTED: uncharacterized protein LOC104896379 [Beta vulgaris subsp. vulgaris]	--	--	--	--	--	--	--	--	--	--	--	--	--	--	--	-	-	-	--	--	--	--	--	--	--	--	--	--	--	--	--	--	--	--	--	--	--
Unigene0000186	1858	0	0	gi|659092708|ref|XP_008447182.1|	930	0	PREDICTED: tRNA (guanine(10)-N2)-methyltransferase homolog [Cucumis melo]	sp|Q5R962|TRM11_PONAB	312	2e-97	tRNA (guanine(10)-N2)-methyltransferase homolog OS=Pongo abelii GN=TRMT11 PE=2 SV=1	At3g26410	767	0	KOG2671	Putative RNA methylase	K15430//tRNA (guanine10-N2)-methyltransferase [EC:2.1.1.214]	0	930	cmo:103489693	--	GO:0090304//nucleic acid metabolic process;GO:0044699//single-organism process;GO:0008152//metabolic process;GO:0009119//ribonucleoside metabolic process;GO:1901068//guanosine-containing compound metabolic process;GO:1901135//carbohydrate derivative metabolic process;GO:0034641//cellular nitrogen compound metabolic process;GO:0006807//nitrogen compound metabolic process;GO:0046128//purine ribonuc…	GO:0005488//binding;GO:0016740//transferase activity;GO:0097159//organic cyclic compound binding;GO:0003824//catalytic activity;GO:0016741//transferase activity, transferring one-carbon groups	-	194	320	UPF0020	Domain	57.3	1.3e-15	--	--	--	--	--	--	--	--	--	--	--	--	--
Unigene0000187	1902	28	0.2177	gi|659092708|ref|XP_008447182.1|	930	0	PREDICTED: tRNA (guanine(10)-N2)-methyltransferase homolog [Cucumis melo]	sp|Q5R962|TRM11_PONAB	312	2e-97	tRNA (guanine(10)-N2)-methyltransferase homolog OS=Pongo abelii GN=TRMT11 PE=2 SV=1	At3g26410	767	0	KOG2671	Putative RNA methylase	K15430//tRNA (guanine10-N2)-methyltransferase [EC:2.1.1.214]	0	930	cmo:103489693	--	GO:0006399//tRNA metabolic process;GO:1902578//single-organism localization;GO:0071702//organic substance transport;GO:0008033//tRNA processing;GO:0042278//purine nucleoside metabolic process;GO:1901360//organic cyclic compound metabolic process;GO:0044237//cellular metabolic process;GO:0051641//cellular localization;GO:0006725//cellular aromatic compound metabolic process;GO:0044281//small molec…	GO:0003824//catalytic activity;GO:0097159//organic cyclic compound binding;GO:0016740//transferase activity;GO:0016741//transferase activity, transferring one-carbon groups;GO:0005488//binding	-	194	320	UPF0020	Domain	57.3	1.3e-15	--	--	--	--	--	--	--	--	--	--	--	--	--
Unigene0000188	552	51	1.3662	--	--	--	--	--	--	--	--	--	--	--	--	--	--	--	--	--	--	--	-	-	-	--	--	--	--	--	--	--	--	--	--	--	--	--	--	--	--	--	--	--
Unigene0000189	1562	1596	15.1084	gi|659120825|ref|XP_008460368.1|	418	2e-142	PREDICTED: B-cell receptor-associated protein 31-like [Cucumis melo]	--	--	--	--	At5g48660	278	2e-89	KOG1962	B-cell receptor-associated protein and related proteins	K14009//B-cell receptor-associated protein 31	8e-143	418	cmo:103499211	ko04141//Protein processing in endoplasmic reticulum//Folding, sorting and degradation//Genetic Information Processing	GO:0008104//protein localization;GO:0033036//macromolecule localization;GO:0015031//protein transport;GO:0071702//organic substance transport;GO:0045184//establishment of protein localization;GO:0051179//localization;GO:0006810//transport;GO:0051234//establishment of localization	-	GO:0005623//cell;GO:0043227//membrane-bounded organelle;GO:0043231//intracellular membrane-bounded organelle;GO:0043226//organelle;GO:0044425//membrane part;GO:0044464//cell part;GO:0043229//intracellular organelle;GO:0031224//intrinsic component of membrane;GO:0044424//intracellular part;GO:0005622//intracellular;GO:0016020//membrane	3	177	Bap31	Family	30.9	1.5e-07	--	--	--	--	--	--	--	--	--	--	--	--	--
Unigene0000190	1754	360	3.0349	gi|659115699|ref|XP_008457688.1|	695	0	PREDICTED: protein MCM10 homolog isoform X3 [Cucumis melo]	sp|Q0VBD2|MCM10_MOUSE	129	5e-30	Protein MCM10 homolog OS=Mus musculus GN=Mcm10 PE=2 SV=1	At2g20980	271	1e-84	KOG3056	Protein required for S-phase initiation or completion	K10736//minichromosome maintenance protein 10	0	710	csv:101219022	--	GO:0006807//nitrogen compound metabolic process;GO:0090304//nucleic acid metabolic process;GO:0006139//nucleobase-containing compound metabolic process;GO:1901360//organic cyclic compound metabolic process;GO:0044238//primary metabolic process;GO:0044260//cellular macromolecule metabolic process;GO:0006259//DNA metabolic process;GO:0008152//metabolic process;GO:0044237//cellular metabolic process…	-	GO:0043226//organelle;GO:0043229//intracellular organelle;GO:0044464//cell part;GO:0043231//intracellular membrane-bounded organelle;GO:0044424//intracellular part;GO:0005622//intracellular;GO:0005623//cell;GO:0043227//membrane-bounded organelle	213	255	zf-primase	Domain	51	7.2e-14	--	--	--	--	--	--	--	--	--	--	--	--	--
Unigene0000191	521	50	1.4191	--	--	--	--	--	--	--	--	--	--	--	--	--	--	--	--	--	--	--	-	-	-	--	--	--	--	--	--	--	--	--	--	--	--	--	--	--	--	--	--	--
Unigene0000192	253	19	1.1105	--	--	--	--	--	--	--	--	--	--	--	--	--	--	--	--	--	--	--	-	-	-	--	--	--	--	--	--	--	--	--	--	--	--	--	--	--	--	--	--	--
Unigene0000193	206	11	0.7896	--	--	--	--	--	--	--	--	--	--	--	--	--	--	--	--	--	--	--	-	-	-	--	--	--	--	--	--	--	--	--	--	--	--	--	--	--	--	--	--	--
Unigene0000194	365	19	0.7697	gi|659106435|ref|XP_008453326.1|	107	2e-25	PREDICTED: pentatricopeptide repeat-containing protein At1g18485 [Cucumis melo]	--	--	--	--	--	--	--	--	--	--	--	--	--	--	--	-	-	-	--	--	--	--	--	--	--	--	--	--	--	--	--	--	--	--	--	--	--
Unigene0000195	477	6	0.186	gi|21745136|gb|AAM77272.1|AF519809_1	179	1e-50	acid invertase [Lagenaria siceraria]	sp|P29001|INVA_VIGRR	146	5e-40	Acid beta-fructofuranosidase OS=Vigna radiata var. radiata GN=INVA PE=1 SV=1	At1g12240	138	2e-37	KOG0228	Beta-fructofuranosidase (invertase)	K01193//beta-fructofuranosidase [EC:3.2.1.26]	1e-50	177	csv:101207009	ko00500//Starch and sucrose metabolism//Carbohydrate metabolism//Metabolism;ko00052//Galactose metabolism//Carbohydrate metabolism//Metabolism	GO:0008152//metabolic process;GO:0044238//primary metabolic process	GO:0016787//hydrolase activity;GO:0004553//hydrolase activity, hydrolyzing O-glycosyl compounds;GO:0003824//catalytic activity;GO:0004564//beta-fructofuranosidase activity;GO:0016798//hydrolase activity, acting on glycosyl bonds	-	4	45	Glyco_hydro_32C	Domain	33.4	3.9e-08	2	45	Glyco_32	1e-14	50.8	--	--	--	--	--	--	--	--
Unigene0000196	2149	13910	95.7102	gi|449451749|ref|XP_004143623.1|	1132	0	PREDICTED: acid beta-fructofuranosidase-like [Cucumis sativus]	sp|P80065|INVB_DAUCA	828	0	Beta-fructofuranosidase, soluble isoenzyme I OS=Daucus carota GN=INV*DC4 PE=1 SV=2	At1g12240	748	0	KOG0228	Beta-fructofuranosidase (invertase)	K01193//beta-fructofuranosidase [EC:3.2.1.26]	0	1132	csv:101207009	ko00500//Starch and sucrose metabolism//Carbohydrate metabolism//Metabolism;ko00052//Galactose metabolism//Carbohydrate metabolism//Metabolism	GO:0008152//metabolic process;GO:0044238//primary metabolic process	GO:0003824//catalytic activity;GO:0004564//beta-fructofuranosidase activity;GO:0016798//hydrolase activity, acting on glycosyl bonds;GO:0004553//hydrolase activity, hydrolyzing O-glycosyl compounds;GO:0016787//hydrolase activity	-	7|106|490	98|425|576	DUF3357|Glyco_hydro_32N|Glyco_hydro_32C	Family|Domain|Domain	61.6|382.3|65.0	4.6e-17|1.5e-114|5.4e-18	106	576	Glyco_32	6.4e-227	753.6	--	--	--	--	--	--	--	--
Unigene0000197	312	18	0.8531	--	--	--	--	--	--	--	--	--	--	--	--	--	--	--	--	--	--	--	-	-	-	--	--	--	--	--	--	--	--	--	--	--	--	--	--	--	--	--	--	--
Unigene0000198	720	499	10.2479	gi|659096840|ref|XP_008449315.1|	142	2e-40	PREDICTED: EPIDERMAL PATTERNING FACTOR-like protein 4 [Cucumis melo]	sp|Q2V3I3|EPFL4_ARATH	110	6e-29	EPIDERMAL PATTERNING FACTOR-like protein 4 OS=Arabidopsis thaliana GN=EPFL4 PE=1 SV=1	--	--	--	--	--	--	--	--	--	--	--	-	-	-	--	--	--	--	--	--	--	--	--	--	--	--	--	--	--	--	--	--	--
Unigene0000199	964	982	15.0627	gi|694441526|ref|XP_009347507.1|	317	7e-105	PREDICTED: sulfated surface glycoprotein 185-like [Pyrus x bretschneideri]	--	--	--	--	--	--	--	--	--	--	--	--	--	--	--	-	GO:0016757//transferase activity, transferring glycosyl groups;GO:0016763//transferase activity, transferring pentosyl groups;GO:0003824//catalytic activity;GO:0016740//transferase activity	-	--	--	--	--	--	--	--	--	--	--	--	--	--	--	--	--	--	--	--
Unigene0000200	351	26	1.0953	--	--	--	--	--	--	--	--	--	--	--	--	--	--	--	--	--	--	--	-	-	-	--	--	--	--	--	--	--	--	--	--	--	--	--	--	--	--	--	--	--
Unigene0000201	431	38	1.3037	gi|77551963|gb|ABA94760.1|	59.3	1e-08	Protein kinase domain containing protein, expressed [Oryza sativa Japonica Group]	--	--	--	--	--	--	--	--	--	--	--	--	--	--	--	-	-	GO:0005623//cell;GO:0044424//intracellular part;GO:0005622//intracellular;GO:0044464//cell part	49	107	RVT_3	Domain	25.1	9.9e-06	--	--	--	--	--	--	--	--	--	--	--	--	--
Unigene0000202	1126	490	6.4347	gi|449432584|ref|XP_004134079.1|	411	1e-141	PREDICTED: 3-hydroxybutyryl-CoA dehydratase-like protein, mitochondrial [Cucumis sativus]	sp|O23300|ECI3_ARATH	284	2e-92	Enoyl-CoA delta isomerase 3 OS=Arabidopsis thaliana GN=ECI3 PE=1 SV=1	7297574	65.9	1e-11	KOG1683	Hydroxyacyl-CoA dehydrogenase/enoyl-CoA hydratase	--	--	--	--	--	--	-	-	-	23	205	ECH	Family	85.2	3.3e-24	--	--	--	--	--	--	--	--	--	--	--	--	--
Unigene0000203	1005	31770	467.432	gi|659125306|ref|XP_008462618.1|	370	2e-126	PREDICTED: protein YLS9-like [Cucumis melo]	sp|Q9SJ52|YLS9_ARATH	87.4	7e-19	Protein YLS9 OS=Arabidopsis thaliana GN=YLS9 PE=2 SV=1	--	--	--	--	--	--	--	--	--	--	--	-	-	-	73	176	LEA_2	Family	38.8	8.3e-10	--	--	--	--	--	--	--	--	--	--	--	--	--
Unigene0000204	535	52	1.4372	--	--	--	--	--	--	--	--	--	--	--	--	--	--	--	--	--	--	--	-	-	-	--	--	--	--	--	--	--	--	--	--	--	--	--	--	--	--	--	--	--
Unigene0000205	336	13	0.5721	--	--	--	--	--	--	--	--	--	--	--	--	--	--	--	--	--	--	--	-	-	-	--	--	--	--	--	--	--	--	--	--	--	--	--	--	--	--	--	--	--
Unigene0000206	353	14	0.5864	--	--	--	--	--	--	--	--	--	--	--	--	--	--	--	--	--	--	--	-	-	-	--	--	--	--	--	--	--	--	--	--	--	--	--	--	--	--	--	--	--
Unigene0000207	256	14	0.8086	gi|823263550|ref|XP_012464540.1|	53.9	2e-07	PREDICTED: CRC domain-containing protein TSO1-like [Gossypium raimondii]	--	--	--	--	--	--	--	--	--	--	--	--	--	--	--	-	-	-	--	--	--	--	--	--	--	--	--	--	--	--	--	--	--	--	--	--	--
Unigene0000208	469	30	0.9458	--	--	--	--	--	--	--	--	--	--	--	--	--	--	--	--	--	--	--	-	-	-	--	--	--	--	--	--	--	--	--	--	--	--	--	--	--	--	--	--	--
Unigene0000209	209	6	0.4245	gi|645249187|ref|XP_008230636.1|	80.1	1e-16	PREDICTED: probable inactive receptor kinase At2g26730 [Prunus mume]	--	--	--	--	--	--	--	--	--	--	--	--	--	--	--	GO:0009987//cellular process;GO:0071704//organic substance metabolic process;GO:0043412//macromolecule modification;GO:0036211//protein modification process;GO:0019538//protein metabolic process;GO:0006464//cellular protein modification process;GO:0006793//phosphorus metabolic process;GO:0044237//cellular metabolic process;GO:0044267//cellular protein metabolic process;GO:0008152//metabolic proce…	GO:0016301//kinase activity;GO:0016740//transferase activity;GO:0043167//ion binding;GO:1901363//heterocyclic compound binding;GO:0003824//catalytic activity;GO:0005488//binding;GO:0016772//transferase activity, transferring phosphorus-containing groups;GO:0097159//organic cyclic compound binding;GO:0036094//small molecule binding	-	--	--	--	--	--	--	--	--	--	--	--	--	--	--	--	--	--	--	--
Unigene0000210	217	8	0.5451	--	--	--	--	--	--	--	--	--	--	--	--	--	--	--	--	--	--	--	-	-	-	--	--	--	--	--	--	--	--	--	--	--	--	--	--	--	--	--	--	--
Unigene0000211	205	9	0.6492	--	--	--	--	--	--	--	--	--	--	--	--	--	--	--	--	--	--	--	-	-	-	--	--	--	--	--	--	--	--	--	--	--	--	--	--	--	--	--	--	--
Unigene0000212	302	12	0.5875	--	--	--	--	--	--	--	--	--	--	--	--	--	--	--	--	--	--	--	-	-	-	--	--	--	--	--	--	--	--	--	--	--	--	--	--	--	--	--	--	--
Unigene0000213	349	39	1.6524	--	--	--	--	--	--	--	--	--	--	--	--	--	--	--	--	--	--	--	-	-	-	--	--	--	--	--	--	--	--	--	--	--	--	--	--	--	--	--	--	--
Unigene0000214	214	28	1.9347	--	--	--	--	--	--	--	--	--	--	--	--	--	--	--	--	--	--	--	-	-	-	--	--	--	--	--	--	--	--	--	--	--	--	--	--	--	--	--	--	--
Unigene0000215	404	25	0.915	--	--	--	--	--	--	--	--	--	--	--	--	--	--	--	--	--	--	--	-	-	-	--	--	--	--	--	--	--	--	--	--	--	--	--	--	--	--	--	--	--
Unigene0000216	262	9	0.5079	--	--	--	--	--	--	--	--	--	--	--	--	--	--	--	--	--	--	--	-	-	-	--	--	--	--	--	--	--	--	--	--	--	--	--	--	--	--	--	--	--
Unigene0000217	256	21	1.213	--	--	--	--	--	--	--	--	--	--	--	--	--	--	--	--	--	--	--	-	-	-	--	--	--	--	--	--	--	--	--	--	--	--	--	--	--	--	--	--	--
Unigene0000218	472	26	0.8145	gi|5454189|gb|AAD43604.1|AC005698_3	90.1	9e-19	T3P18.3 [Arabidopsis thaliana]	--	--	--	--	At1g31210	89	7e-20	KOG0017	FOG: Transposon-encoded proteins with TYA, reverse transcriptase, integrase domains in various combinations	--	--	--	--	--	--	GO:0071704//organic substance metabolic process;GO:0044238//primary metabolic process;GO:0008152//metabolic process;GO:0043170//macromolecule metabolic process	GO:0005488//binding	-	34	139	UBN2	Family	60.2	1.3e-16	--	--	--	--	--	--	--	--	--	--	--	--	--
Unigene0000219	221	12	0.8029	--	--	--	--	--	--	--	--	--	--	--	--	--	--	--	--	--	--	--	-	-	-	--	--	--	--	--	--	--	--	--	--	--	--	--	--	--	--	--	--	--
Unigene0000220	210	0	0	--	--	--	--	--	--	--	--	--	--	--	--	--	--	--	--	--	--	--	-	-	-	--	--	--	--	--	--	--	--	--	--	--	--	--	--	--	--	--	--	--
Unigene0000221	211	0	0	--	--	--	--	--	--	--	--	--	--	--	--	--	--	--	--	--	--	--	-	-	-	--	--	--	--	--	--	--	--	--	--	--	--	--	--	--	--	--	--	--
Unigene0000222	2076	5602	39.901	gi|590664003|ref|XP_007036379.1|	191	2e-53	Octicosapeptide/Phox/Bem1p family protein [Theobroma cacao]	--	--	--	--	--	--	--	--	--	--	--	--	--	--	--	-	-	-	17	89	PB1	Domain	69.3	1.4e-19	16	98	PB1	2.2e-29	100	--	--	--	--	--	--	--	--
Unigene0000223	497	81	2.4099	--	--	--	--	--	--	--	--	--	--	--	--	--	--	--	--	--	--	--	-	-	-	--	--	--	--	--	--	--	--	--	--	--	--	--	--	--	--	--	--	--
Unigene0000224	1536	177	1.7039	gi|778696900|ref|XP_004145582.2|	752	0	PREDICTED: LOW QUALITY PROTEIN: pentatricopeptide repeat-containing protein At4g31850, chloroplastic [Cucumis sativus]	sp|Q9SZ52|PP344_ARATH	478	5e-155	Pentatricopeptide repeat-containing protein At4g31850, chloroplastic OS=Arabidopsis thaliana GN=PGR3 PE=1 SV=1	At4g31850	478	8e-156	KOG4197	FOG: PPR repeat	--	--	--	--	--	--	GO:0008152//metabolic process;GO:0009987//cellular process;GO:0044238//primary metabolic process;GO:0044710//single-organism metabolic process;GO:0044699//single-organism process;GO:0044763//single-organism cellular process;GO:0044237//cellular metabolic process;GO:0043170//macromolecule metabolic process;GO:0071704//organic substance metabolic process	-	-	191|269|365	237|309|409	PPR_2|PPR_2|PPR_2	Repeat|Repeat|Repeat	37.6|46.4|52.9	1.4e-09|2.6e-12|2.3e-14	--	--	--	--	--	--	PRGDB00213057	MDP0000278168	Putative_R-Genes,_predicted_from_Pythozome	Malus x domestica	TNL	3e-27	117
Unigene0000225	2293	444	2.8632	gi|659104199|ref|XP_008452843.1|	1366	0	PREDICTED: pentatricopeptide repeat-containing protein At4g31850, chloroplastic [Cucumis melo]	sp|Q9SZ52|PP344_ARATH	997	0	Pentatricopeptide repeat-containing protein At4g31850, chloroplastic OS=Arabidopsis thaliana GN=PGR3 PE=1 SV=1	At4g31850	997	0	KOG4197	FOG: PPR repeat	--	--	--	--	--	--	GO:0044763//single-organism cellular process;GO:0009987//cellular process;GO:0043170//macromolecule metabolic process;GO:0044238//primary metabolic process;GO:0044237//cellular metabolic process;GO:0008152//metabolic process;GO:0044699//single-organism process;GO:0071704//organic substance metabolic process;GO:0044710//single-organism metabolic process	-	-	1|102|172|242|386|418|486|523|593|663	43|151|221|288|413|467|517|571|637|703	PPR_2|PPR_2|PPR_2|PPR_2|PPR_3|PPR_2|PPR_1|PPR_2|PPR_2|PPR_2	Repeat|Repeat|Repeat|Repeat|Repeat|Repeat|Repeat|Repeat|Repeat|Repeat	46.6|59.8|64.7|30.9|11.1|52.9|33.8|49.9|45.7|38.5	2.2e-12|1.6e-16|4.9e-18|1.8e-07|0.34|2.3e-14|1.5e-08|2e-13|4.3e-12|7.5e-10	--	--	--	--	--	--	PRGDB00213057	MDP0000278168	Putative_R-Genes,_predicted_from_Pythozome	Malus x domestica	TNL	3e-33	139
Unigene0000226	205	7	0.5049	--	--	--	--	--	--	--	--	--	--	--	--	--	--	--	--	--	--	--	-	-	-	--	--	--	--	--	--	--	--	--	--	--	--	--	--	--	--	--	--	--
Unigene0000227	1372	90	0.97	gi|659107568|ref|XP_008453740.1|	563	0	PREDICTED: random slug protein 5 [Cucumis melo]	sp|Q55CU8|RSC5_DICDI	131	1e-32	Random slug protein 5 OS=Dictyostelium discoideum GN=rsc5 PE=2 SV=1	At1g75170	379	2e-128	KOG1470	Phosphatidylinositol transfer protein PDR16 and related proteins	--	--	--	--	--	--	GO:1901576//organic substance biosynthetic process;GO:1901360//organic cyclic compound metabolic process;GO:0019438//aromatic compound biosynthetic process;GO:0009699//phenylpropanoid biosynthetic process;GO:0019748//secondary metabolic process;GO:0051179//localization;GO:0009987//cellular process;GO:0008152//metabolic process;GO:0044237//cellular metabolic process;GO:0071704//organic substance m…	-	GO:0005623//cell;GO:0044464//cell part	23|101	69|242	CRAL_TRIO_N|CRAL_TRIO	Domain|Domain	40.1|121.5	2.6e-10|2e-35	44|89	69|244	CRAL_TRIO_N|SEC14	1.6e-08|1.5e-47	32.0|159.8	--	--	--	--	--	--	--	--
Unigene0000228	1401	19	0.2005	gi|659107568|ref|XP_008453740.1|	348	2e-153	PREDICTED: random slug protein 5 [Cucumis melo]	sp|Q55CU8|RSC5_DICDI	77	4e-26	Random slug protein 5 OS=Dictyostelium discoideum GN=rsc5 PE=2 SV=1	At1g75170	229	1e-98	KOG1470	Phosphatidylinositol transfer protein PDR16 and related proteins	--	--	--	--	--	--	GO:0009987//cellular process;GO:0019438//aromatic compound biosynthetic process;GO:0071704//organic substance metabolic process;GO:0044550//secondary metabolite biosynthetic process;GO:1901360//organic cyclic compound metabolic process;GO:0044699//single-organism process;GO:0044249//cellular biosynthetic process;GO:0008152//metabolic process;GO:0044763//single-organism cellular process;GO:0019748…	-	GO:0044464//cell part;GO:0005623//cell	6	126	CRAL_TRIO	Domain	102.3	1.6e-29	1	128	SEC14	1.4e-40	136.9	--	--	--	--	--	--	--	--
Unigene0000229	336	18	0.7921	gi|743894794|ref|XP_011040657.1|	126	3e-33	PREDICTED: lysosomal amino acid transporter 1 [Populus euphratica]	sp|Q95XZ6|LAAT1_CAEEL	53.1	5e-08	Lysosomal amino acid transporter 1 OS=Caenorhabditis elegans GN=laat-1 PE=1 SV=2	At4g20100	108	5e-29	KOG2913	Predicted membrane protein	--	--	--	--	--	--	-	-	GO:0031224//intrinsic component of membrane;GO:0016020//membrane;GO:0044425//membrane part	2	35	PQ-loop	Repeat	32.3	4.8e-08	1	22	CTNS	2.9e-06	24.8	--	--	--	--	--	--	--	--
Unigene0000230	327	24	1.0853	gi|659092282|ref|XP_008446991.1|	137	2e-38	PREDICTED: protein FAR1-RELATED SEQUENCE 3-like [Cucumis melo]	--	--	--	--	--	--	--	--	--	--	--	--	--	--	--	-	-	-	3	76	MULE	Domain	78.7	2.4e-22	--	--	--	--	--	--	--	--	--	--	--	--	--
Unigene0000231	228	17	1.1025	--	--	--	--	--	--	--	--	--	--	--	--	--	--	--	--	--	--	--	-	-	-	--	--	--	--	--	--	--	--	--	--	--	--	--	--	--	--	--	--	--
Unigene0000232	462	42	1.3442	--	--	--	--	--	--	--	--	--	--	--	--	--	--	--	--	--	--	--	-	-	-	--	--	--	--	--	--	--	--	--	--	--	--	--	--	--	--	--	--	--
Unigene0000233	292	20	1.0128	--	--	--	--	--	--	--	--	--	--	--	--	--	--	--	--	--	--	--	-	-	-	--	--	--	--	--	--	--	--	--	--	--	--	--	--	--	--	--	--	--
Unigene0000234	955	59	0.9135	gi|596118969|ref|XP_007221728.1|	55.1	2e-07	hypothetical protein PRUPE_ppb020328mg [Prunus persica]	--	--	--	--	--	--	--	--	--	--	--	--	--	--	--	-	-	-	--	--	--	--	--	--	--	--	--	--	--	--	--	--	--	--	--	--	--
Unigene0000235	672	4	0.088	gi|596118969|ref|XP_007221728.1|	55.1	7e-08	hypothetical protein PRUPE_ppb020328mg [Prunus persica]	--	--	--	--	--	--	--	--	--	--	--	--	--	--	--	-	-	-	--	--	--	--	--	--	--	--	--	--	--	--	--	--	--	--	--	--	--
Unigene0000236	397	28	1.0429	gi|115463031|ref|NP_001055115.1|	54.3	2e-08	Os05g0296200, partial [Oryza sativa Japonica Group]	--	--	--	--	--	--	--	--	--	--	--	--	--	--	--	-	-	GO:0044464//cell part;GO:0043226//organelle;GO:0044424//intracellular part;GO:0005623//cell;GO:0005622//intracellular;GO:0043227//membrane-bounded organelle;GO:0043231//intracellular membrane-bounded organelle;GO:0043229//intracellular organelle	--	--	--	--	--	--	--	--	--	--	--	--	--	--	--	--	--	--	--
Unigene0000237	1010	1527	22.3555	gi|659092037|ref|XP_008446866.1|	306	5e-102	PREDICTED: DNL-type zinc finger protein [Cucumis melo]	sp|Q0IH40|DNLZ_XENLA	84.7	4e-18	DNL-type zinc finger protein OS=Xenopus laevis GN=dnlz PE=2 SV=1	7293113	79.3	6e-18	KOG3277	Uncharacterized conserved protein	K17808//mitochondrial protein import protein ZIM17	5e-107	320	csv:101207740	--	-	GO:0005488//binding;GO:0046872//metal ion binding;GO:0046914//transition metal ion binding;GO:0043167//ion binding;GO:0043169//cation binding	-	103	166	zf-DNL	Domain	86.4	6.6e-25	--	--	--	--	--	--	--	--	--	--	--	--	--
Unigene0000238	245	17	1.026	--	--	--	--	--	--	--	--	--	--	--	--	--	--	--	--	--	--	--	-	-	-	--	--	--	--	--	--	--	--	--	--	--	--	--	--	--	--	--	--	--
Unigene0000239	367	30	1.2087	--	--	--	--	--	--	--	--	--	--	--	--	--	--	--	--	--	--	--	-	-	-	--	--	--	--	--	--	--	--	--	--	--	--	--	--	--	--	--	--	--
Unigene0000240	436	35	1.187	--	--	--	--	--	--	--	--	--	--	--	--	--	--	--	--	--	--	--	-	-	-	--	--	--	--	--	--	--	--	--	--	--	--	--	--	--	--	--	--	--
Unigene0000241	335	27	1.1918	--	--	--	--	--	--	--	--	--	--	--	--	--	--	--	--	--	--	--	-	-	-	--	--	--	--	--	--	--	--	--	--	--	--	--	--	--	--	--	--	--
Unigene0000242	332	18	0.8017	gi|769818630|ref|XP_011621330.1|	53.5	8e-08	PREDICTED: uncharacterized protein LOC105420238 [Amborella trichopoda]	--	--	--	--	--	--	--	--	--	--	--	--	--	--	--	-	-	-	--	--	--	--	--	--	--	--	--	--	--	--	--	--	--	--	--	--	--
Unigene0000243	205	12	0.8656	--	--	--	--	--	--	--	--	--	--	--	--	--	--	--	--	--	--	--	-	-	-	--	--	--	--	--	--	--	--	--	--	--	--	--	--	--	--	--	--	--
Unigene0000244	849	165	2.8737	gi|728811059|gb|KHF99988.1|	278	1e-87	Beta-1,3-glucosyltransferase [Gossypium arboreum]	--	--	--	--	At3g11420	245	2e-76	KOG2246	Galactosyltransferases	--	--	--	--	--	--	-	GO:0003824//catalytic activity;GO:0016740//transferase activity	-	1	192	DUF604	Family	232.5	4e-69	--	--	--	--	--	--	--	--	--	--	--	--	--
Unigene0000245	931	109	1.7312	gi|657393992|gb|KEH34744.1|	310	2e-99	transferring glycosyl group transferase [Medicago truncatula]	sp|P79948|LFNG_XENLA	54.3	6e-07	Beta-1,3-N-acetylglucosaminyltransferase lunatic fringe OS=Xenopus laevis GN=lfng PE=2 SV=1	At2g37730	284	1e-90	KOG2246	Galactosyltransferases	--	--	--	--	--	--	-	-	-	177	247	DUF604	Family	121.4	3.3e-35	--	--	--	--	--	--	--	--	--	--	--	--	--
Unigene0000246	740	88	1.7584	gi|449433333|ref|XP_004134452.1|	347	1e-114	PREDICTED: sugar transport protein 13-like [Cucumis sativus]	sp|Q94AZ2|STP13_ARATH	310	6e-101	Sugar transport protein 13 OS=Arabidopsis thaliana GN=STP13 PE=1 SV=2	At5g26340	310	9e-102	KOG0254	Predicted transporter (major facilitator superfamily)	--	--	--	--	--	--	GO:0071705//nitrogen compound transport;GO:0006810//transport;GO:0051234//establishment of localization;GO:0008645//hexose transport;GO:0046942//carboxylic acid transport;GO:0008643//carbohydrate transport;GO:1902578//single-organism localization;GO:0015749//monosaccharide transport;GO:0044763//single-organism cellular process;GO:0006811//ion transport;GO:0009987//cellular process;GO:0044765//sin…	GO:0022804//active transmembrane transporter activity;GO:0016628//oxidoreductase activity, acting on the CH-CH group of donors, NAD or NADP as acceptor;GO:0005351//sugar:proton symporter activity;GO:0022891//substrate-specific transmembrane transporter activity;GO:0015291//secondary active transmembrane transporter activity;GO:0005402//cation:sugar symporter activity;GO:0015295//solute:proton sym…	GO:0044425//membrane part;GO:0031224//intrinsic component of membrane;GO:0005911//cell-cell junction;GO:0030054//cell junction;GO:0016020//membrane	1	148	Sugar_tr	Family	121.9	2.2e-35	--	--	--	--	--	--	PRGDB00201715	Bra001175	Putative_R-Genes,_predicted_from_Pythozome	Brassica rapa	TNL	2e-57	199
Unigene0000247	293	16	0.8075	--	--	--	--	--	--	--	--	--	--	--	--	--	--	--	--	--	--	--	-	-	-	--	--	--	--	--	--	--	--	--	--	--	--	--	--	--	--	--	--	--
Unigene0000248	262	8	0.4515	gi|659129077|ref|XP_008464518.1|	61.2	6e-10	PREDICTED: DEAD-box ATP-dependent RNA helicase 30 isoform X2 [Cucumis melo]	sp|Q8W4R3|RH30_ARATH	47.8	4e-06	DEAD-box ATP-dependent RNA helicase 30 OS=Arabidopsis thaliana GN=RH30 PE=2 SV=2	At5g63120	48.1	5e-07	KOG0331	ATP-dependent RNA helicase	K12823//ATP-dependent RNA helicase DDX5/DBP2 [EC:3.6.4.13]	6e-10	60.5	cmo:103502377	ko03040//Spliceosome//Transcription//Genetic Information Processing	-	GO:0036094//small molecule binding;GO:0097159//organic cyclic compound binding;GO:0032550//purine ribonucleoside binding;GO:1901363//heterocyclic compound binding;GO:0097367//carbohydrate derivative binding;GO:0001883//purine nucleoside binding;GO:0001882//nucleoside binding;GO:0032549//ribonucleoside binding;GO:0016817//hydrolase activity, acting on acid anhydrides;GO:0016818//hydrolase activity…	-	--	--	--	--	--	--	--	--	--	--	--	--	--	--	--	--	--	--	--
Unigene0000249	721	192	3.9376	gi|659095994|ref|XP_008448869.1|	178	1e-52	PREDICTED: 36.4 kDa proline-rich protein [Cucumis melo]	sp|Q9SU35|ERLL1_ARATH	84.3	1e-18	pEARLI1-like lipid transfer protein 1 OS=Arabidopsis thaliana GN=AZI1 PE=1 SV=1	--	--	--	--	--	--	--	--	--	--	--	-	-	-	10	93	Tryp_alpha_amyl	Family	23.2	5.3e-05	12	93	AAI	6e-06	24	--	--	--	--	--	--	--	--
Unigene0000250	359	34	1.4004	gi|778689658|ref|XP_011652997.1|	75.9	2e-14	PREDICTED: zinc finger BED domain-containing protein DAYSLEEPER-like [Cucumis sativus]	--	--	--	--	At1g80020	54.7	7e-09	KOG1121	Tam3-transposase (Ac family)	--	--	--	--	--	--	-	GO:0097159//organic cyclic compound binding;GO:0005515//protein binding;GO:0003676//nucleic acid binding;GO:0005488//binding;GO:1901363//heterocyclic compound binding	-	--	--	--	--	--	--	--	--	--	--	--	--	--	--	--	--	--	--	--
Unigene0000251	389	26	0.9883	gi|778689658|ref|XP_011652997.1|	259	8e-81	PREDICTED: zinc finger BED domain-containing protein DAYSLEEPER-like [Cucumis sativus]	sp|Q9M2N5|DSLE_ARATH	129	5e-34	Zinc finger BED domain-containing protein DAYSLEEPER OS=Arabidopsis thaliana GN=HAT PE=1 SV=1	At1g80020	137	4e-37	KOG1121	Tam3-transposase (Ac family)	--	--	--	--	--	--	-	GO:0097159//organic cyclic compound binding;GO:0003676//nucleic acid binding;GO:1901363//heterocyclic compound binding;GO:0005515//protein binding;GO:0005488//binding	-	3	37	zf-BED	Domain	22	9.1e-05	2	39	ZnF_BED	9.1e-09	33.3	--	--	--	--	--	--	--	--
Unigene0000252	364	24	0.9749	--	--	--	--	--	--	--	--	--	--	--	--	--	--	--	--	--	--	--	-	-	-	--	--	--	--	--	--	--	--	--	--	--	--	--	--	--	--	--	--	--
Unigene0000253	623	62	1.4715	--	--	--	--	--	--	--	--	--	--	--	--	--	--	--	--	--	--	--	-	-	-	--	--	--	--	--	--	--	--	--	--	--	--	--	--	--	--	--	--	--
Unigene0000254	309	27	1.292	--	--	--	--	--	--	--	--	--	--	--	--	--	--	--	--	--	--	--	-	-	-	--	--	--	--	--	--	--	--	--	--	--	--	--	--	--	--	--	--	--
Unigene0000255	298	14	0.6947	gi|659093138|ref|XP_008447390.1|	196	2e-58	PREDICTED: LOW QUALITY PROTEIN: protein NRT1/ PTR FAMILY 5.2-like [Cucumis melo]	sp|Q9FNL8|PTR4_ARATH	141	3e-39	Protein NRT1/ PTR FAMILY 5.3 OS=Arabidopsis thaliana GN=NPF5.3 PE=2 SV=1	At5g46040	141	4e-40	KOG1237	H+/oligopeptide symporter	K14638//solute carrier family 15 (peptide/histidine transporter), member 3/4	8e-49	169	egu:105054447	--	GO:0051179//localization;GO:0051234//establishment of localization	-	-	3	99	PTR2	Family	98.9	2.3e-28	--	--	--	--	--	--	--	--	--	--	--	--	--
Unigene0000256	250	12	0.7098	--	--	--	--	--	--	--	--	--	--	--	--	--	--	--	--	--	--	--	-	-	-	--	--	--	--	--	--	--	--	--	--	--	--	--	--	--	--	--	--	--
Unigene0000257	290	15	0.7648	--	--	--	--	--	--	--	--	--	--	--	--	--	--	--	--	--	--	--	-	-	-	--	--	--	--	--	--	--	--	--	--	--	--	--	--	--	--	--	--	--
Unigene0000258	286	17	0.8789	--	--	--	--	--	--	--	--	--	--	--	--	--	--	--	--	--	--	--	-	-	-	--	--	--	--	--	--	--	--	--	--	--	--	--	--	--	--	--	--	--
Unigene0000259	229	2	0.1291	--	--	--	--	--	--	--	--	--	--	--	--	--	--	--	--	--	--	--	-	-	-	--	--	--	--	--	--	--	--	--	--	--	--	--	--	--	--	--	--	--
Unigene0000260	229	0	0	--	--	--	--	--	--	--	--	--	--	--	--	--	--	--	--	--	--	--	-	-	-	--	--	--	--	--	--	--	--	--	--	--	--	--	--	--	--	--	--	--
Unigene0000261	391	2	0.0756	gi|657381812|gb|KEH25772.1|	105	2e-25	endonuclease/exonuclease/phosphatase family protein [Medicago truncatula]	--	--	--	--	At1g77820	80.5	1e-18	KOG1075	FOG: Reverse transcriptase	--	--	--	--	--	--	-	-	-	6	94	Exo_endo_phos	Domain	24.4	2.1e-05	--	--	--	--	--	--	--	--	--	--	--	--	--
Unigene0000262	682	51	1.1057	gi|657381812|gb|KEH25772.1|	105	2e-24	endonuclease/exonuclease/phosphatase family protein [Medicago truncatula]	--	--	--	--	At1g77820	80.5	1e-17	KOG1075	FOG: Reverse transcriptase	--	--	--	--	--	--	-	-	-	6	94	Exo_endo_phos	Domain	24.4	2.1e-05	--	--	--	--	--	--	--	--	--	--	--	--	--
Unigene0000263	439	79	2.6609	--	--	--	--	--	--	--	--	--	--	--	--	--	--	--	--	--	--	--	-	-	-	--	--	--	--	--	--	--	--	--	--	--	--	--	--	--	--	--	--	--
Unigene0000264	657	34	0.7652	gi|449446484|ref|XP_004141001.1|	80.5	3e-15	PREDICTED: cleavage stimulating factor 64 [Cucumis sativus]	sp|Q9M9G6|CTF64_ARATH	51.2	2e-06	Cleavage stimulating factor 64 OS=Arabidopsis thaliana GN=CSTF64 PE=1 SV=1	At1g71800	50.8	4e-07	KOG0108	mRNA cleavage and polyadenylation factor I complex, subunit RNA15	K14407//cleavage stimulation factor subunit 2	1e-15	80.5	csv:101211663	ko03015//mRNA surveillance pathway//Translation//Genetic Information Processing	-	GO:0097159//organic cyclic compound binding;GO:0005488//binding;GO:0036094//small molecule binding	-	7	45	CSTF_C	Domain	38.3	5e-10	--	--	--	--	--	--	--	--	--	--	--	--	--
Unigene0000265	2183	2405	16.2903	gi|659113670|ref|XP_008456694.1|	943	0	PREDICTED: cleavage stimulation factor subunit 2 [Cucumis melo]	sp|Q9M9G6|CTF64_ARATH	373	2e-119	Cleavage stimulating factor 64 OS=Arabidopsis thaliana GN=CSTF64 PE=1 SV=1	At1g71800	314	3e-98	KOG0108	mRNA cleavage and polyadenylation factor I complex, subunit RNA15	K14407//cleavage stimulation factor subunit 2	0	943	cmo:103496563	ko03015//mRNA surveillance pathway//Translation//Genetic Information Processing	-	GO:1901363//heterocyclic compound binding;GO:0097159//organic cyclic compound binding;GO:0036094//small molecule binding;GO:0005488//binding	-	9|151|487	79|220|525	RRM_1|CSTF2_hinge|CSTF_C	Domain|Family|Domain	78.7|66.2|31.1	1.6e-22|1.8e-18|9e-08	8	81	RRM	9.8e-29	98.4	--	--	--	--	--	--	--	--
Unigene0000266	498	0	0	gi|659113670|ref|XP_008456694.1|	125	8e-32	PREDICTED: cleavage stimulation factor subunit 2 [Cucumis melo]	sp|Q9M9G6|CTF64_ARATH	112	5e-28	Cleavage stimulating factor 64 OS=Arabidopsis thaliana GN=CSTF64 PE=1 SV=1	At1g71800	112	6e-29	KOG0108	mRNA cleavage and polyadenylation factor I complex, subunit RNA15	K14407//cleavage stimulation factor subunit 2	3e-32	125	cmo:103496563	ko03015//mRNA surveillance pathway//Translation//Genetic Information Processing	GO:0040007//growth;GO:0043170//macromolecule metabolic process;GO:0071704//organic substance metabolic process;GO:0090304//nucleic acid metabolic process;GO:1901360//organic cyclic compound metabolic process;GO:0006807//nitrogen compound metabolic process;GO:0031326//regulation of cellular biosynthetic process;GO:0008152//metabolic process;GO:0050789//regulation of biological process;GO:0006355//…	GO:0003676//nucleic acid binding;GO:0044822//poly(A) RNA binding;GO:1901363//heterocyclic compound binding;GO:0005488//binding;GO:0036094//small molecule binding;GO:0097159//organic cyclic compound binding;GO:0003723//RNA binding	-	9	56	RRM_1	Domain	59.3	1.8e-16	8	56	RRM	2.5e-20	70.9	--	--	--	--	--	--	--	--
Unigene0000267	401	30	1.1062	--	--	--	--	--	--	--	--	--	--	--	--	--	--	--	--	--	--	--	-	-	-	--	--	--	--	--	--	--	--	--	--	--	--	--	--	--	--	--	--	--
Unigene0000268	409	32	1.1569	--	--	--	--	--	--	--	--	--	--	--	--	--	--	--	--	--	--	--	-	-	-	--	--	--	--	--	--	--	--	--	--	--	--	--	--	--	--	--	--	--
Unigene0000269	247	0	0	gi|657959182|ref|XP_008371132.1|	123	7e-34	PREDICTED: protein YLS9-like [Malus domestica]	--	--	--	--	--	--	--	--	--	--	--	--	--	--	--	-	-	-	--	--	--	--	--	--	--	--	--	--	--	--	--	--	--	--	--	--	--
Unigene0000270	791	214	4.0004	gi|659067831|ref|XP_008441513.1|	372	3e-128	PREDICTED: protein NDR1 [Cucumis melo]	sp|O48915|NDR1_ARATH	88.2	2e-19	Protein NDR1 OS=Arabidopsis thaliana GN=NDR1 PE=1 SV=1	--	--	--	--	--	--	--	--	--	--	--	-	-	-	98	201	LEA_2	Family	43.2	3.5e-11	--	--	--	--	--	--	--	--	--	--	--	--	--
Unigene0000271	226	21	1.374	--	--	--	--	--	--	--	--	--	--	--	--	--	--	--	--	--	--	--	-	-	-	--	--	--	--	--	--	--	--	--	--	--	--	--	--	--	--	--	--	--
Unigene0000272	546	0	0	gi|778707247|ref|XP_011655994.1|	172	2e-50	PREDICTED: zinc-finger homeodomain protein 10-like [Cucumis sativus]	sp|Q9LHF0|ZHD9_ARATH	126	1e-33	Zinc-finger homeodomain protein 9 OS=Arabidopsis thaliana GN=ZHD9 PE=1 SV=1	--	--	--	--	--	--	--	--	--	--	--	-	GO:1901363//heterocyclic compound binding;GO:0005488//binding;GO:0003676//nucleic acid binding;GO:0097159//organic cyclic compound binding	-	55	111	ZF-HD_dimer	Family	111.8	1e-32	--	--	--	--	--	ZF-HD	--	--	--	--	--	--	--
Unigene0000273	545	0	0	gi|778707247|ref|XP_011655994.1|	161	6e-46	PREDICTED: zinc-finger homeodomain protein 10-like [Cucumis sativus]	sp|Q9LHF0|ZHD9_ARATH	118	1e-30	Zinc-finger homeodomain protein 9 OS=Arabidopsis thaliana GN=ZHD9 PE=1 SV=1	--	--	--	--	--	--	--	--	--	--	--	-	GO:0005488//binding;GO:0003676//nucleic acid binding;GO:1901363//heterocyclic compound binding;GO:0097159//organic cyclic compound binding	-	55	107	ZF-HD_dimer	Family	99.5	7.1e-29	--	--	--	--	--	ZF-HD	--	--	--	--	--	--	--
Unigene0000274	656	78	1.7582	gi|164562231|gb|ABY61030.1|	245	5e-78	zinc finger-homeodomain protein 1, partial [Cucumis sativus]	sp|Q9LHF0|ZHD9_ARATH	128	6e-34	Zinc-finger homeodomain protein 9 OS=Arabidopsis thaliana GN=ZHD9 PE=1 SV=1	--	--	--	--	--	--	--	--	--	--	--	-	GO:0005488//binding;GO:1901363//heterocyclic compound binding;GO:0097159//organic cyclic compound binding;GO:0003676//nucleic acid binding	-	--	--	--	--	--	--	--	--	--	--	--	--	--	--	--	--	--	--	--
Unigene0000275	319	16	0.7416	--	--	--	--	--	--	--	--	--	--	--	--	--	--	--	--	--	--	--	-	-	-	--	--	--	--	--	--	--	--	--	--	--	--	--	--	--	--	--	--	--
Unigene0000276	1228	781	9.4042	gi|694370481|ref|XP_009363021.1|	159	2e-42	PREDICTED: histone H3.v1 [Pyrus x bretschneideri]	--	--	--	--	--	--	--	--	--	--	--	--	--	--	--	-	-	-	96	283	DUF1645	Family	104	1.2e-29	--	--	--	--	--	--	--	--	--	--	--	--	--
Unigene0000277	486	73	2.221	--	--	--	--	--	--	--	--	--	--	--	--	--	--	--	--	--	--	--	-	-	-	--	--	--	--	--	--	--	--	--	--	--	--	--	--	--	--	--	--	--
Unigene0000278	562	0	0	--	--	--	--	--	--	--	--	--	--	--	--	--	--	--	--	--	--	--	-	-	-	--	--	--	--	--	--	--	--	--	--	--	--	--	--	--	--	--	--	--
Unigene0000279	563	0	0	--	--	--	--	--	--	--	--	--	--	--	--	--	--	--	--	--	--	--	-	-	-	--	--	--	--	--	--	--	--	--	--	--	--	--	--	--	--	--	--	--
Unigene0000280	2031	14682	106.891	gi|728812618|gb|KHG00924.1|	931	0	Protein FAM69A [Gossypium arboreum]	--	--	--	--	--	--	--	--	--	--	--	--	--	--	--	-	-	-	--	--	--	--	--	--	--	--	--	--	--	--	--	--	--	--	--	--	--
Unigene0000281	355	19	0.7914	--	--	--	--	--	--	--	--	--	--	--	--	--	--	--	--	--	--	--	-	-	-	--	--	--	--	--	--	--	--	--	--	--	--	--	--	--	--	--	--	--
Unigene0000282	510	118	3.4212	--	--	--	--	--	--	--	--	--	--	--	--	--	--	--	--	--	--	--	-	-	-	--	--	--	--	--	--	--	--	--	--	--	--	--	--	--	--	--	--	--
Unigene0000283	328	15	0.6762	--	--	--	--	--	--	--	--	--	--	--	--	--	--	--	--	--	--	--	-	-	-	--	--	--	--	--	--	--	--	--	--	--	--	--	--	--	--	--	--	--
Unigene0000284	329	20	0.8989	gi|108862659|gb|ABA98146.2|	231	6e-74	oxidoreductase, short chain dehydrogenase/reductase family protein, expressed [Oryza sativa Japonica Group]	sp|Q9LUE4|HSD6_ARATH	139	4e-39	11-beta-hydroxysteroid dehydrogenase-like 6 OS=Arabidopsis thaliana GN=HSD6 PE=2 SV=1	At5g50770	139	7e-40	KOG1205	Predicted dehydrogenase	--	--	--	--	--	--	GO:0044710//single-organism metabolic process;GO:0008152//metabolic process;GO:0044699//single-organism process;GO:0051234//establishment of localization;GO:0051179//localization	GO:0003824//catalytic activity	GO:0043231//intracellular membrane-bounded organelle;GO:0044464//cell part;GO:0005622//intracellular;GO:0044424//intracellular part;GO:0043229//intracellular organelle;GO:0005623//cell;GO:0043226//organelle;GO:0043227//membrane-bounded organelle	13	57	adh_short	Domain	28	1.6e-06	--	--	--	--	--	--	--	--	--	--	--	--	--
Unigene0000285	238	8	0.497	gi|659096268|ref|XP_008449005.1|	131	9e-35	PREDICTED: subtilisin-like protease isoform X2 [Cucumis melo]	sp|Q9ZSP5|AIR3_ARATH	111	3e-28	Subtilisin-like protease SBT5.3 OS=Arabidopsis thaliana GN=AIR3 PE=2 SV=1	--	--	--	--	--	--	--	--	--	--	--	GO:0071704//organic substance metabolic process;GO:0019538//protein metabolic process;GO:0043170//macromolecule metabolic process;GO:0044238//primary metabolic process;GO:0050789//regulation of biological process;GO:0008152//metabolic process;GO:0009892//negative regulation of metabolic process;GO:0065007//biological regulation;GO:0019222//regulation of metabolic process;GO:0048519//negative regu…	GO:0005515//protein binding;GO:0016787//hydrolase activity;GO:0005488//binding;GO:0070011//peptidase activity, acting on L-amino acid peptides;GO:0008233//peptidase activity;GO:0003824//catalytic activity;GO:0004175//endopeptidase activity	-	--	--	--	--	--	--	--	--	--	--	--	--	--	--	--	--	--	--	--
Unigene0000286	208	8	0.5687	gi|7767672|gb|AAF69169.1|AC007915_21	53.9	4e-09	F27F5.21 [Arabidopsis thaliana]	sp|P92555|M1250_ARATH	49.3	8e-08	Uncharacterized mitochondrial protein AtMg01250 OS=Arabidopsis thaliana GN=AtMg01250 PE=4 SV=1	At3g45550	50.4	2e-10	KOG1075	FOG: Reverse transcriptase	K18577//mannosylglycoprotein endo-beta-mannosidase [EC:3.2.1.152]	3e-16	68.2	mdm:103414113	--	-	-	-	2	38	RVT_1	Family	25.1	8.3e-06	--	--	--	--	--	--	--	--	--	--	--	--	--
Unigene0000287	478	57	1.7633	gi|449444264|ref|XP_004139895.1|	204	1e-64	PREDICTED: dirigent protein 6 [Cucumis sativus]	--	--	--	--	--	--	--	--	--	--	--	--	--	--	--	-	GO:0043169//cation binding;GO:0043167//ion binding;GO:0005488//binding;GO:0046872//metal ion binding	-	44	123	Dirigent	Family	30.5	2e-07	--	--	--	--	--	--	--	--	--	--	--	--	--
Unigene0000288	1018	3220	46.7709	gi|659125677|ref|XP_008462809.1|	289	3e-95	PREDICTED: transmembrane protein 18 [Cucumis melo]	sp|Q3SZ36|TMM18_BOVIN	89	5e-20	Transmembrane protein 18 OS=Bos taurus GN=TMEM18 PE=2 SV=1	At1g34350	107	9e-25	KOG1881	Anion exchanger adaptor protein Kanadaptin, contains FHA domain	--	--	--	--	--	--	-	-	-	--	--	--	--	--	--	--	--	--	--	--	--	--	--	--	--	--	--	--
Unigene0000289	869	664	11.2984	gi|659093573|ref|XP_008447601.1|	282	3e-93	PREDICTED: PRA1 family protein F2-like [Cucumis melo]	sp|Q9C889|PR1F2_ARATH	206	5e-64	PRA1 family protein F2 OS=Arabidopsis thaliana GN=PRA1F2 PE=1 SV=1	At1g55190	206	8e-65	KOG3142	Prenylated rab acceptor 1	--	--	--	--	--	--	GO:0051179//localization;GO:0051234//establishment of localization;GO:0006810//transport	GO:0016491//oxidoreductase activity;GO:0046872//metal ion binding;GO:0005488//binding;GO:0043169//cation binding;GO:0043167//ion binding;GO:0003824//catalytic activity	GO:0043227//membrane-bounded organelle;GO:0044422//organelle part;GO:0005622//intracellular;GO:0043226//organelle;GO:0043231//intracellular membrane-bounded organelle;GO:0044464//cell part;GO:0016020//membrane;GO:0005623//cell;GO:0031090//organelle membrane;GO:0044424//intracellular part;GO:0043229//intracellular organelle	32	176	PRA1	Family	153.5	2.4e-45	--	--	--	--	--	--	PRGDB00217808	Thhalv10006389m	Putative_R-Genes,_predicted_from_Pythozome	Eutrema halophilum	RLP	5e-29	116
Unigene0000290	225	27	1.7744	--	--	--	--	--	--	--	--	--	--	--	--	--	--	--	--	--	--	--	-	-	-	--	--	--	--	--	--	--	--	--	--	--	--	--	--	--	--	--	--	--
Unigene0000291	354	15	0.6265	--	--	--	--	--	--	--	--	--	--	--	--	--	--	--	--	--	--	--	-	-	-	--	--	--	--	--	--	--	--	--	--	--	--	--	--	--	--	--	--	--
Unigene0000292	244	15	0.909	--	--	--	--	--	--	--	--	--	--	--	--	--	--	--	--	--	--	--	-	-	-	--	--	--	--	--	--	--	--	--	--	--	--	--	--	--	--	--	--	--
Unigene0000293	1190	91	1.1307	gi|659069539|ref|XP_008450536.1|	738	0	PREDICTED: heat shock 70 kDa protein [Cucumis melo]	sp|P26413|HSP70_SOYBN	687	0	Heat shock 70 kDa protein OS=Glycine max GN=HSP70 PE=3 SV=1	At3g12580	667	0	KOG0101	Molecular chaperones HSP70/HSC70, HSP70 superfamily	K03283//heat shock 70kDa protein 1/8	0	738	cmo:103492106	ko04141//Protein processing in endoplasmic reticulum//Folding, sorting and degradation//Genetic Information Processing;ko04144//Endocytosis//Transport and catabolism//Cellular Processes;ko03040//Spliceosome//Transcription//Genetic Information Processing	-	GO:1901363//heterocyclic compound binding;GO:0097159//organic cyclic compound binding;GO:0036094//small molecule binding;GO:0001882//nucleoside binding;GO:0032550//purine ribonucleoside binding;GO:0097367//carbohydrate derivative binding;GO:0001883//purine nucleoside binding;GO:0032549//ribonucleoside binding;GO:0005488//binding	-	9	363	HSP70	Family	582	8.3e-175	--	--	--	--	--	--	PRGDB00167710	Medtr2g047020.1	Putative_R-Genes,_predicted_from_Pythozome	Medicago truncatula	TNL	0	595
Unigene0000294	550	58	1.5593	gi|297728511|ref|NP_001176619.1|	40.4	7e-07	Os11g0573700 [Oryza sativa Japonica Group]	--	--	--	--	--	--	--	--	--	--	--	--	--	--	--	-	-	-	--	--	--	--	--	--	--	--	--	--	--	--	--	--	--	--	--	--	--
Unigene0000295	339	21	0.916	--	--	--	--	--	--	--	--	--	--	--	--	--	--	--	--	--	--	--	-	-	-	--	--	--	--	--	--	--	--	--	--	--	--	--	--	--	--	--	--	--
Unigene0000296	313	18	0.8503	--	--	--	--	--	--	--	--	--	--	--	--	--	--	--	--	--	--	--	-	-	-	--	--	--	--	--	--	--	--	--	--	--	--	--	--	--	--	--	--	--
Unigene0000297	230	11	0.7072	--	--	--	--	--	--	--	--	--	--	--	--	--	--	--	--	--	--	--	-	-	-	--	--	--	--	--	--	--	--	--	--	--	--	--	--	--	--	--	--	--
Unigene0000298	252	0	0	--	--	--	--	--	--	--	--	--	--	--	--	--	--	--	--	--	--	--	-	-	-	--	--	--	--	--	--	--	--	--	--	--	--	--	--	--	--	--	--	--
Unigene0000299	275	4	0.2151	--	--	--	--	--	--	--	--	--	--	--	--	--	--	--	--	--	--	--	-	-	-	--	--	--	--	--	--	--	--	--	--	--	--	--	--	--	--	--	--	--
Unigene0000300	571	2292	59.3535	gi|674959984|emb|CDX73668.1|	125	2e-34	BnaC08g23350D [Brassica napus]	--	--	--	--	--	--	--	--	--	--	--	--	--	--	--	-	-	-	--	--	--	--	--	--	--	--	--	--	--	--	--	--	--	--	--	--	--
Unigene0000301	215	8	0.5502	--	--	--	--	--	--	--	--	--	--	--	--	--	--	--	--	--	--	--	-	-	-	--	--	--	--	--	--	--	--	--	--	--	--	--	--	--	--	--	--	--
Unigene0000302	315	23	1.0797	--	--	--	--	--	--	--	--	--	--	--	--	--	--	--	--	--	--	--	-	-	-	--	--	--	--	--	--	--	--	--	--	--	--	--	--	--	--	--	--	--
Unigene0000303	285	25	1.2971	gi|700204797|gb|KGN59930.1|	66.2	2e-11	hypothetical protein Csa_3G854260 [Cucumis sativus]	--	--	--	--	--	--	--	--	--	K17964//leucine-rich PPR motif-containing protein, mitochondrial	9e-12	66.2	csv:101211773	--	-	-	-	--	--	--	--	--	--	--	--	--	--	--	--	--	--	--	--	--	--	--
Unigene0000304	407	33	1.1989	gi|449455399|ref|XP_004145440.1|	181	4e-52	PREDICTED: pentatricopeptide repeat-containing protein At2g35130 [Cucumis sativus]	sp|O82178|PP186_ARATH	104	3e-25	Pentatricopeptide repeat-containing protein At2g35130 OS=Arabidopsis thaliana GN=At2g35130 PE=2 SV=1	At2g35130	104	5e-26	KOG4197	FOG: PPR repeat	--	--	--	--	--	--	-	-	-	--	--	--	--	--	--	--	--	--	--	--	--	--	--	--	--	--	--	--
Unigene0000305	414	37	1.3215	gi|659118262|ref|XP_008459029.1|	272	3e-87	PREDICTED: pentatricopeptide repeat-containing protein At2g35130 isoform X2 [Cucumis melo]	sp|O82178|PP186_ARATH	172	9e-50	Pentatricopeptide repeat-containing protein At2g35130 OS=Arabidopsis thaliana GN=At2g35130 PE=2 SV=1	At2g35130	172	1e-50	KOG4197	FOG: PPR repeat	--	--	--	--	--	--	-	-	-	62	111	PPR_2	Repeat	38.4	8.1e-10	--	--	--	--	--	--	--	--	--	--	--	--	--
Unigene0000306	384	25	0.9627	--	--	--	--	--	--	--	--	--	--	--	--	--	--	--	--	--	--	--	-	-	-	--	--	--	--	--	--	--	--	--	--	--	--	--	--	--	--	--	--	--
Unigene0000307	584	110	2.7851	gi|449455732|ref|XP_004145605.1|	184	2e-57	PREDICTED: copper transport protein ATX1-like [Cucumis sativus]	sp|Q94BT9|ATOX1_ARATH	46.6	8e-06	Copper transport protein ATX1 OS=Arabidopsis thaliana GN=ATX1 PE=1 SV=1	At1g06330	58.9	7e-11	KOG1603	Copper chaperone	--	--	--	--	--	--	GO:1902578//single-organism localization;GO:0044765//single-organism transport;GO:0006812//cation transport;GO:0051179//localization;GO:0006811//ion transport;GO:0044699//single-organism process;GO:0006810//transport;GO:0051234//establishment of localization	GO:0043167//ion binding;GO:0043169//cation binding;GO:0005488//binding	-	16	58	HMA	Domain	25.3	1.1e-05	--	--	--	--	--	--	--	--	--	--	--	--	--
Unigene0000308	223	8	0.5305	--	--	--	--	--	--	--	--	--	--	--	--	--	--	--	--	--	--	--	-	-	-	--	--	--	--	--	--	--	--	--	--	--	--	--	--	--	--	--	--	--
Unigene0000309	1510	40	0.3917	gi|778679088|ref|XP_011651086.1|	348	9e-137	PREDICTED: probable pectinesterase 67 [Cucumis sativus]	sp|Q9LSP1|PME67_ARATH	302	2e-96	Probable pectinesterase 67 OS=Arabidopsis thaliana GN=PME67 PE=2 SV=1	--	--	--	--	--	--	--	--	--	--	--	GO:0009987//cellular process	GO:0003824//catalytic activity;GO:0016788//hydrolase activity, acting on ester bonds;GO:0016787//hydrolase activity	-	110|198	171|279	Pectinesterase|Pectinesterase	Family|Family	49.3|35.3	2.2e-13|3.9e-09	--	--	--	--	--	--	--	--	--	--	--	--	--
Unigene0000310	1294	0	0	gi|778679088|ref|XP_011651086.1|	299	3e-122	PREDICTED: probable pectinesterase 67 [Cucumis sativus]	sp|Q9LSP1|PME67_ARATH	244	5e-75	Probable pectinesterase 67 OS=Arabidopsis thaliana GN=PME67 PE=2 SV=1	--	--	--	--	--	--	--	--	--	--	--	GO:0009987//cellular process	GO:0016787//hydrolase activity;GO:0003824//catalytic activity;GO:0016788//hydrolase activity, acting on ester bonds	-	110	171	Pectinesterase	Family	49.6	1.8e-13	--	--	--	--	--	--	--	--	--	--	--	--	--
Unigene0000311	442	46	1.5389	--	--	--	--	--	--	--	--	--	--	--	--	--	--	--	--	--	--	--	-	-	-	--	--	--	--	--	--	--	--	--	--	--	--	--	--	--	--	--	--	--
Unigene0000312	304	2	0.0973	gi|657987802|ref|XP_008386064.1|	48.5	2e-06	PREDICTED: uncharacterized protein LOC103448574 [Malus domestica]	--	--	--	--	--	--	--	--	--	--	--	--	--	--	--	-	-	-	2	85	RVT_3	Domain	61.7	3.7e-17	--	--	--	--	--	--	--	--	--	--	--	--	--
Unigene0000313	539	19	0.5212	gi|53370641|gb|AAU89136.1|	68.9	1e-11	F-box domain containing protein [Oryza sativa Japonica Group]	--	--	--	--	At4g29090	48.9	9e-07	KOG1075	FOG: Reverse transcriptase	--	--	--	--	--	--	-	-	-	103	164	RVT_3	Domain	51.6	5.5e-14	--	--	--	--	--	--	--	--	--	--	--	--	--
Unigene0000314	256	9	0.5198	--	--	--	--	--	--	--	--	--	--	--	--	--	--	--	--	--	--	--	-	-	-	--	--	--	--	--	--	--	--	--	--	--	--	--	--	--	--	--	--	--
Unigene0000315	306	20	0.9664	--	--	--	--	--	--	--	--	--	--	--	--	--	--	--	--	--	--	--	-	-	-	--	--	--	--	--	--	--	--	--	--	--	--	--	--	--	--	--	--	--
Unigene0000316	249	12	0.7126	--	--	--	--	--	--	--	--	--	--	--	--	--	--	--	--	--	--	--	-	-	-	--	--	--	--	--	--	--	--	--	--	--	--	--	--	--	--	--	--	--
Unigene0000317	379	29	1.1314	--	--	--	--	--	--	--	--	--	--	--	--	--	--	--	--	--	--	--	-	-	-	--	--	--	--	--	--	--	--	--	--	--	--	--	--	--	--	--	--	--
Unigene0000318	507	53	1.5457	gi|659075856|ref|XP_008438368.1|	256	7e-82	PREDICTED: transcription factor FAMA [Cucumis melo]	sp|Q56YJ8|FAMA_ARATH	205	6e-63	Transcription factor FAMA OS=Arabidopsis thaliana GN=FAMA PE=1 SV=1	--	--	--	--	--	--	--	--	--	--	--	GO:0044700//single organism signaling;GO:0070887//cellular response to chemical stimulus;GO:0050794//regulation of cellular process;GO:0048856//anatomical structure development;GO:0044707//single-multicellular organism process;GO:0030154//cell differentiation;GO:0007275//multicellular organismal development;GO:0044710//single-organism metabolic process;GO:0065007//biological regulation;GO:0032502…	GO:0005515//protein binding;GO:0003824//catalytic activity;GO:0043177//organic acid binding;GO:0031406//carboxylic acid binding;GO:0043168//anion binding;GO:0016491//oxidoreductase activity;GO:0036094//small molecule binding;GO:0005488//binding;GO:0043167//ion binding	-	--	--	--	--	--	--	--	--	--	--	--	--	--	--	--	--	--	--	--
Unigene0000319	278	10	0.5319	--	--	--	--	--	--	--	--	--	--	--	--	--	--	--	--	--	--	--	-	-	-	--	--	--	--	--	--	--	--	--	--	--	--	--	--	--	--	--	--	--
Unigene0000320	340	23	1.0003	--	--	--	--	--	--	--	--	--	--	--	--	--	--	--	--	--	--	--	-	-	-	--	--	--	--	--	--	--	--	--	--	--	--	--	--	--	--	--	--	--
Unigene0000321	1468	1715	17.2745	gi|470102050|ref|XP_004287472.1|	477	1e-163	PREDICTED: spartin-like [Fragaria vesca subsp. vesca]	--	--	--	--	--	--	--	--	--	--	--	--	--	--	--	-	-	-	173	346	Senescence	Family	168.5	1e-49	--	--	--	--	--	--	--	--	--	--	--	--	--
Unigene0000322	288	14	0.7188	--	--	--	--	--	--	--	--	--	--	--	--	--	--	--	--	--	--	--	-	-	-	--	--	--	--	--	--	--	--	--	--	--	--	--	--	--	--	--	--	--
Unigene0000323	236	19	1.1904	--	--	--	--	--	--	--	--	--	--	--	--	--	--	--	--	--	--	--	-	-	-	--	--	--	--	--	--	--	--	--	--	--	--	--	--	--	--	--	--	--
Unigene0000324	351	4	0.1685	gi|778690736|ref|XP_004146554.2|	133	6e-37	PREDICTED: zinc-finger homeodomain protein 6-like [Cucumis sativus]	sp|Q688U3|ZHD6_ORYSJ	97.8	4e-24	Zinc-finger homeodomain protein 6 OS=Oryza sativa subsp. japonica GN=ZHD6 PE=2 SV=1	--	--	--	--	--	--	--	--	--	--	--	-	GO:0097159//organic cyclic compound binding;GO:0005488//binding;GO:0003676//nucleic acid binding;GO:1901363//heterocyclic compound binding	-	--	--	--	--	--	--	--	--	--	--	--	--	--	--	--	--	--	--	--
Unigene0000325	351	3	0.1264	gi|778690736|ref|XP_004146554.2|	142	3e-40	PREDICTED: zinc-finger homeodomain protein 6-like [Cucumis sativus]	sp|Q9ZPW7|ZHD6_ARATH	101	2e-25	Zinc-finger homeodomain protein 6 OS=Arabidopsis thaliana GN=ZHD6 PE=1 SV=1	--	--	--	--	--	--	--	--	--	--	--	-	GO:0097159//organic cyclic compound binding;GO:0005488//binding;GO:1901363//heterocyclic compound binding;GO:0003676//nucleic acid binding	-	--	--	--	--	--	--	--	--	--	--	--	--	--	--	--	--	--	--	--
Unigene0000326	454	110	3.5826	gi|778690736|ref|XP_004146554.2|	149	1e-42	PREDICTED: zinc-finger homeodomain protein 6-like [Cucumis sativus]	sp|Q9FRL5|ZHD5_ARATH	95.5	1e-22	Zinc-finger homeodomain protein 5 OS=Arabidopsis thaliana GN=ZHD5 PE=1 SV=1	--	--	--	--	--	--	--	--	--	--	--	-	-	-	38	93	ZF-HD_dimer	Family	98	2.1e-28	--	--	--	--	--	ZF-HD	--	--	--	--	--	--	--
Unigene0000327	213	12	0.833	--	--	--	--	--	--	--	--	--	--	--	--	--	--	--	--	--	--	--	-	-	-	--	--	--	--	--	--	--	--	--	--	--	--	--	--	--	--	--	--	--
Unigene0000328	1027	0	0	gi|659129528|ref|XP_008464718.1|	310	2e-103	PREDICTED: probable calcium-binding protein CML25 [Cucumis melo]	sp|Q9FYK2|CML25_ARATH	207	4e-64	Probable calcium-binding protein CML25 OS=Arabidopsis thaliana GN=CML25 PE=2 SV=1	At1g24620	207	6e-65	KOG0027	Calmodulin and related proteins (EF-Hand superfamily)	K13448//calcium-binding protein CML	8e-104	310	cmo:103502536	ko04626//Plant-pathogen interaction//Environmental adaptation//Organismal Systems	GO:0048856//anatomical structure development;GO:0044699//single-organism process;GO:0032502//developmental process	GO:0016491//oxidoreductase activity;GO:0043167//ion binding;GO:0005488//binding;GO:0043169//cation binding;GO:0003824//catalytic activity;GO:0046872//metal ion binding	GO:0044464//cell part;GO:0005623//cell;GO:0005622//intracellular;GO:0044424//intracellular part	44|117	102|177	EF_hand_5|EF_hand_5	Domain|Domain	51.2|50.0	9.1e-14|2.2e-13	43|79|116|152	71|103|144|179	EFh|EFh|EFh|EFh	2.4e-37|2.4e-37|2.4e-37|2.4e-37	122.5|122.5|122.5|122.5	--	--	--	--	--	--	--	--
Unigene0000329	1026	0	0	gi|659129528|ref|XP_008464718.1|	310	2e-103	PREDICTED: probable calcium-binding protein CML25 [Cucumis melo]	sp|Q9FYK2|CML25_ARATH	207	4e-64	Probable calcium-binding protein CML25 OS=Arabidopsis thaliana GN=CML25 PE=2 SV=1	At1g24620	207	6e-65	KOG0027	Calmodulin and related proteins (EF-Hand superfamily)	K13448//calcium-binding protein CML	8e-104	310	cmo:103502536	ko04626//Plant-pathogen interaction//Environmental adaptation//Organismal Systems	GO:0032502//developmental process;GO:0044699//single-organism process;GO:0048856//anatomical structure development	GO:0043169//cation binding;GO:0046872//metal ion binding;GO:0003824//catalytic activity;GO:0016491//oxidoreductase activity;GO:0005488//binding;GO:0043167//ion binding	GO:0044424//intracellular part;GO:0005623//cell;GO:0005622//intracellular;GO:0044464//cell part	44|117	102|177	EF_hand_5|EF_hand_5	Domain|Domain	51.2|50.0	9.1e-14|2.2e-13	43|79|116|152	71|103|144|179	EFh|EFh|EFh|EFh	2.4e-37|2.4e-37|2.4e-37|2.4e-37	122.5|122.5|122.5|122.5	--	--	--	--	--	--	--	--
Unigene0000330	301	29	1.4246	--	--	--	--	--	--	--	--	--	--	--	--	--	--	--	--	--	--	--	-	-	-	--	--	--	--	--	--	--	--	--	--	--	--	--	--	--	--	--	--	--
Unigene0000331	204	10	0.7248	gi|659124864|ref|XP_008462386.1|	109	5e-27	PREDICTED: probable LRR receptor-like serine/threonine-protein kinase At1g51860 [Cucumis melo]	sp|Q9FN93|Y5596_ARATH	60.8	8e-11	Probable LRR receptor-like serine/threonine-protein kinase At5g59680 OS=Arabidopsis thaliana GN=At5g59680 PE=2 SV=1	At1g51870	58.2	1e-10	KOG1187	Serine/threonine protein kinase	--	--	--	--	--	--	GO:0044260//cellular macromolecule metabolic process;GO:0036211//protein modification process;GO:0008152//metabolic process;GO:0044267//cellular protein metabolic process;GO:0044237//cellular metabolic process;GO:0006464//cellular protein modification process;GO:0009987//cellular process;GO:0043170//macromolecule metabolic process;GO:0071704//organic substance metabolic process;GO:0044238//primar…	GO:0016740//transferase activity;GO:0001883//purine nucleoside binding;GO:0032549//ribonucleoside binding;GO:0097367//carbohydrate derivative binding;GO:1901363//heterocyclic compound binding;GO:0097159//organic cyclic compound binding;GO:0016301//kinase activity;GO:0016772//transferase activity, transferring phosphorus-containing groups;GO:0005488//binding;GO:0032550//purine ribonucleoside bindi…	-	1	68	Malectin_like	Domain	31.5	8.6e-08	--	--	--	--	--	--	PRGWK00000327	MELO3C024423	Contributed_R-Genes	Cucumis melo	RLK	2e-28	109
Unigene0000332	672	0	0	gi|659072821|ref|XP_008467112.1|	285	2e-93	PREDICTED: F-box protein SKIP28 isoform X1 [Cucumis melo]	sp|Q9ZU90|SKI28_ARATH	119	2e-30	F-box protein SKIP28 OS=Arabidopsis thaliana GN=SKIP28 PE=1 SV=1	--	--	--	--	--	--	--	--	--	--	--	-	-	-	--	--	--	--	--	--	--	--	--	--	--	--	--	--	--	--	--	--	--
Unigene0000333	1148	72	0.9274	gi|449464814|ref|XP_004150124.1|	491	2e-171	PREDICTED: F-box protein SKIP28 [Cucumis sativus]	sp|Q9ZU90|SKI28_ARATH	201	1e-59	F-box protein SKIP28 OS=Arabidopsis thaliana GN=SKIP28 PE=1 SV=1	--	--	--	--	--	--	--	--	--	--	--	GO:0032502//developmental process;GO:0044699//single-organism process;GO:0044707//single-multicellular organism process;GO:0032501//multicellular organismal process	-	-	65	106	F-box-like	Domain	25.3	7.9e-06	129	153	LRR_CC	5.2e-06	24.1	--	--	--	--	--	--	--	--
Unigene0000334	353	385	16.127	--	--	--	--	--	--	--	--	--	--	--	--	--	--	--	--	--	--	--	-	-	-	--	--	--	--	--	--	--	--	--	--	--	--	--	--	--	--	--	--	--
Unigene0000335	475	29	0.9028	--	--	--	--	--	--	--	--	--	--	--	--	--	--	--	--	--	--	--	-	-	-	--	--	--	--	--	--	--	--	--	--	--	--	--	--	--	--	--	--	--
Unigene0000336	657	85	1.913	--	--	--	--	--	--	--	--	--	--	--	--	--	--	--	--	--	--	--	-	-	-	--	--	--	--	--	--	--	--	--	--	--	--	--	--	--	--	--	--	--
Unigene0000337	373	35	1.3875	gi|449442026|ref|XP_004138783.1|	147	7e-41	PREDICTED: transcription factor JUNGBRUNNEN 1 [Cucumis sativus]	--	--	--	--	--	--	--	--	--	--	--	--	--	--	--	GO:1901576//organic substance biosynthetic process;GO:0044249//cellular biosynthetic process;GO:0050789//regulation of biological process;GO:0065007//biological regulation;GO:0043170//macromolecule metabolic process;GO:0009059//macromolecule biosynthetic process;GO:0009058//biosynthetic process;GO:0008152//metabolic process;GO:0019222//regulation of metabolic process;GO:0044260//cellular macromol…	GO:0005488//binding;GO:0003676//nucleic acid binding;GO:0097159//organic cyclic compound binding;GO:1901363//heterocyclic compound binding	-	--	--	--	--	--	--	--	--	--	--	--	--	--	--	--	--	--	--	--
Unigene0000338	287	28	1.4426	gi|659088569|ref|XP_008445052.1|	131	1e-35	PREDICTED: transcription factor JUNGBRUNNEN 1 [Cucumis melo]	--	--	--	--	--	--	--	--	--	--	--	--	--	--	--	GO:0009058//biosynthetic process;GO:0050789//regulation of biological process;GO:0008152//metabolic process;GO:0060255//regulation of macromolecule metabolic process;GO:0043170//macromolecule metabolic process;GO:0034645//cellular macromolecule biosynthetic process;GO:0019222//regulation of metabolic process;GO:0009059//macromolecule biosynthetic process;GO:0071704//organic substance metabolic pr…	GO:0097159//organic cyclic compound binding;GO:1901363//heterocyclic compound binding;GO:0005488//binding;GO:0003676//nucleic acid binding	GO:0043226//organelle;GO:0043227//membrane-bounded organelle;GO:0005622//intracellular;GO:0044464//cell part;GO:0043229//intracellular organelle;GO:0005623//cell;GO:0043231//intracellular membrane-bounded organelle;GO:0044424//intracellular part	--	--	--	--	--	--	--	--	--	--	--	--	--	--	--	--	--	--	--
Unigene0000339	494	92	2.7538	gi|449455828|ref|XP_004145652.1|	278	7e-94	PREDICTED: protein TPX2-like [Cucumis sativus]	sp|F4I2H7|TPX2_ARATH	60.1	1e-09	Protein TPX2 OS=Arabidopsis thaliana GN=TPX2 PE=1 SV=1	--	--	--	--	--	--	--	--	--	--	--	GO:0000280//nuclear division;GO:0016043//cellular component organization;GO:0071840//cellular component organization or biogenesis;GO:0006996//organelle organization;GO:0009987//cellular process;GO:0048285//organelle fission	-	GO:0043228//non-membrane-bounded organelle;GO:0044424//intracellular part;GO:0043229//intracellular organelle;GO:0043232//intracellular non-membrane-bounded organelle;GO:0044464//cell part;GO:0005623//cell;GO:0015630//microtubule cytoskeleton;GO:0043226//organelle;GO:0005622//intracellular;GO:0005856//cytoskeleton	49	105	TPX2	Family	46.8	2e-12	--	--	--	--	--	--	--	--	--	--	--	--	--
Unigene0000340	229	13	0.8394	--	--	--	--	--	--	--	--	--	--	--	--	--	--	--	--	--	--	--	-	-	-	--	--	--	--	--	--	--	--	--	--	--	--	--	--	--	--	--	--	--
Unigene0000341	307	24	1.156	--	--	--	--	--	--	--	--	--	--	--	--	--	--	--	--	--	--	--	-	-	-	--	--	--	--	--	--	--	--	--	--	--	--	--	--	--	--	--	--	--
Unigene0000342	242	20	1.222	gi|595851823|ref|XP_007210192.1|	64.7	2e-11	hypothetical protein PRUPE_ppa017805mg, partial [Prunus persica]	--	--	--	--	--	--	--	--	--	--	--	--	--	--	--	-	-	-	--	--	--	--	--	--	--	--	--	--	--	--	--	--	--	--	--	--	--
Unigene0000343	517	43	1.2298	--	--	--	--	--	--	--	--	--	--	--	--	--	--	--	--	--	--	--	-	-	-	--	--	--	--	--	--	--	--	--	--	--	--	--	--	--	--	--	--	--
Unigene0000344	210	13	0.9154	--	--	--	--	--	--	--	--	--	--	--	--	--	--	--	--	--	--	--	-	-	-	--	--	--	--	--	--	--	--	--	--	--	--	--	--	--	--	--	--	--
Unigene0000345	928	110	1.7527	gi|674891842|emb|CDY40914.1|	416	1e-139	BnaC06g30520D [Brassica napus]	sp|Q9STE1|PP333_ARATH	273	7e-83	Pentatricopeptide repeat-containing protein At4g21300 OS=Arabidopsis thaliana GN=PCMP-E36 PE=3 SV=1	At1g69350	397	1e-131	KOG4197	FOG: PPR repeat	--	--	--	--	--	--	-	-	-	18|45|121|148|223	43|92|146|194|245	PPR|PPR_2|PPR|PPR_2|PPR	Family|Repeat|Family|Repeat|Family	22.9|31.9|17.0|34.9|10.6	4.8e-05|8.5e-08|0.0038|1e-08|0.4	--	--	--	--	--	--	PRGDB00183352	GSVIVT01015461001	Putative_R-Genes,_predicted_from_Pythozome	Vitis vinifera	N	1e-58	207
Unigene0000346	1368	221	2.3888	gi|224101423|ref|XP_002312273.1|	520	1e-175	pentatricopeptide repeat-containing family protein [Populus trichocarpa]	sp|Q9LN01|PPR21_ARATH	253	5e-74	Pentatricopeptide repeat-containing protein At1g08070, chloroplastic OS=Arabidopsis thaliana GN=PCMP-H12 PE=2 SV=1	At1g69350	457	2e-152	KOG4197	FOG: PPR repeat	--	--	--	--	--	--	-	-	-	65|138|166|266|367	91|163|196|312|405	PPR|PPR|PPR|PPR_2|PPR_2	Family|Family|Family|Repeat|Repeat	16.8|18.1|19.6|33.8|35.0	0.0041|0.0016|0.00056|2.2e-08|8.8e-09	--	--	--	--	--	--	PRGDB00183352	GSVIVT01015461001	Putative_R-Genes,_predicted_from_Pythozome	Vitis vinifera	N	3e-54	199
Unigene0000347	230	11	0.7072	--	--	--	--	--	--	--	--	--	--	--	--	--	--	--	--	--	--	--	-	-	-	--	--	--	--	--	--	--	--	--	--	--	--	--	--	--	--	--	--	--
Unigene0000348	213	9	0.6248	--	--	--	--	--	--	--	--	--	--	--	--	--	--	--	--	--	--	--	-	-	-	--	--	--	--	--	--	--	--	--	--	--	--	--	--	--	--	--	--	--
Unigene0000349	575	55	1.4144	--	--	--	--	--	--	--	--	--	--	--	--	--	--	--	--	--	--	--	-	-	-	--	--	--	--	--	--	--	--	--	--	--	--	--	--	--	--	--	--	--
Unigene0000350	276	26	1.3929	--	--	--	--	--	--	--	--	--	--	--	--	--	--	--	--	--	--	--	-	-	-	--	--	--	--	--	--	--	--	--	--	--	--	--	--	--	--	--	--	--
Unigene0000351	336	36	1.5843	--	--	--	--	--	--	--	--	--	--	--	--	--	--	--	--	--	--	--	-	-	-	--	--	--	--	--	--	--	--	--	--	--	--	--	--	--	--	--	--	--
Unigene0000352	298	21	1.042	--	--	--	--	--	--	--	--	--	--	--	--	--	--	--	--	--	--	--	-	-	-	--	--	--	--	--	--	--	--	--	--	--	--	--	--	--	--	--	--	--
Unigene0000353	213	8	0.5554	--	--	--	--	--	--	--	--	--	--	--	--	--	--	--	--	--	--	--	-	-	-	--	--	--	--	--	--	--	--	--	--	--	--	--	--	--	--	--	--	--
Unigene0000354	215	14	0.9628	gi|659108989|ref|XP_008454490.1|	142	3e-41	PREDICTED: palmitoyl-monogalactosyldiacylglycerol delta-7 desaturase, chloroplastic-like [Cucumis melo]	sp|Q949X0|ADS3_ARATH	120	9e-33	Palmitoyl-monogalactosyldiacylglycerol delta-7 desaturase, chloroplastic OS=Arabidopsis thaliana GN=ADS3 PE=2 SV=2	At3g15850	120	6e-34	KOG1600	Fatty acid desaturase	K00507//stearoyl-CoA desaturase (delta-9 desaturase) [EC:1.14.19.1]	1e-41	142	cmo:103494888	ko01212//Fatty acid metabolism//Global and Overview//Metabolism;ko01040//Biosynthesis of unsaturated fatty acids//Lipid metabolism//Metabolism	GO:0009987//cellular process;GO:0008152//metabolic process;GO:0044238//primary metabolic process;GO:0006629//lipid metabolic process;GO:0006631//fatty acid metabolic process;GO:0044255//cellular lipid metabolic process;GO:0044237//cellular metabolic process;GO:0032787//monocarboxylic acid metabolic process;GO:0019752//carboxylic acid metabolic process;GO:0071704//organic substance metabolic proce…	GO:0016491//oxidoreductase activity;GO:0003824//catalytic activity;GO:0016705//oxidoreductase activity, acting on paired donors, with incorporation or reduction of molecular oxygen;GO:0016215//acyl-CoA desaturase activity;GO:0016717//oxidoreductase activity, acting on paired donors, with oxidation of a pair of donors resulting in the reduction of molecular oxygen to two molecules of water	GO:0044425//membrane part;GO:0031224//intrinsic component of membrane;GO:0016020//membrane	2	70	FA_desaturase	Domain	34.7	1.1e-08	--	--	--	--	--	--	--	--	--	--	--	--	--
Unigene0000355	1861	1504	11.95	gi|566167089|ref|XP_002305495.2|	624	0	amidase family protein [Populus trichocarpa]	sp|B0JSX3|GATA_MICAN	164	1e-42	Glutamyl-tRNA(Gln) amidotransferase subunit A OS=Microcystis aeruginosa (strain NIES-843) GN=gatA PE=3 SV=1	At4g34880	526	0	KOG1211	Amidases	K01426//amidase [EC:3.5.1.4]	0	907	cmo:103490302	ko00360//Phenylalanine metabolism//Amino acid metabolism//Metabolism;ko00330//Arginine and proline metabolism//Amino acid metabolism//Metabolism;ko00380//Tryptophan metabolism//Amino acid metabolism//Metabolism	-	GO:0016879//ligase activity, forming carbon-nitrogen bonds;GO:0016787//hydrolase activity;GO:0016874//ligase activity;GO:0003824//catalytic activity	-	30	471	Amidase	Family	247.6	1.9e-73	--	--	--	--	--	--	--	--	--	--	--	--	--
Unigene0000356	409	0	0	gi|307136177|gb|ADN34018.1|	87	6e-19	amidase [Cucumis melo subsp. melo]	--	--	--	--	At4g34880	75.5	5e-16	KOG1211	Amidases	K01426//amidase [EC:3.5.1.4]	3e-47	166	cmo:103490302	ko00360//Phenylalanine metabolism//Amino acid metabolism//Metabolism;ko00330//Arginine and proline metabolism//Amino acid metabolism//Metabolism;ko00380//Tryptophan metabolism//Amino acid metabolism//Metabolism	-	GO:0016874//ligase activity;GO:0003824//catalytic activity;GO:0016879//ligase activity, forming carbon-nitrogen bonds;GO:0016787//hydrolase activity	-	--	--	--	--	--	--	--	--	--	--	--	--	--	--	--	--	--	--	--
Unigene0000357	631	6	0.1406	gi|307136168|gb|ADN34009.1|	164	6e-49	amidase [Cucumis melo subsp. melo]	--	--	--	--	At4g34880	153	7e-43	KOG1211	Amidases	K01426//amidase [EC:3.5.1.4]	3e-62	209	csv:101205749	ko00360//Phenylalanine metabolism//Amino acid metabolism//Metabolism;ko00330//Arginine and proline metabolism//Amino acid metabolism//Metabolism;ko00380//Tryptophan metabolism//Amino acid metabolism//Metabolism	-	GO:0016874//ligase activity;GO:0003824//catalytic activity;GO:0016879//ligase activity, forming carbon-nitrogen bonds	-	--	--	--	--	--	--	--	--	--	--	--	--	--	--	--	--	--	--	--
Unigene0000358	483	25	0.7654	gi|720022792|ref|XP_010263147.1|	74.3	1e-13	PREDICTED: NADH dehydrogenase [ubiquinone] flavoprotein 1, mitochondrial-like [Nelumbo nucifera]	--	--	--	--	--	--	--	--	--	--	--	--	--	--	--	-	-	GO:0043231//intracellular membrane-bounded organelle;GO:0044464//cell part;GO:0043226//organelle;GO:0005911//cell-cell junction;GO:0043227//membrane-bounded organelle;GO:0005622//intracellular;GO:0030054//cell junction;GO:0044424//intracellular part;GO:0005623//cell;GO:0043229//intracellular organelle	--	--	--	--	--	--	--	--	--	--	--	--	--	--	--	--	--	--	--
Unigene0000359	309	20	0.9571	--	--	--	--	--	--	--	--	--	--	--	--	--	--	--	--	--	--	--	-	-	-	--	--	--	--	--	--	--	--	--	--	--	--	--	--	--	--	--	--	--
Unigene0000360	247	11	0.6585	--	--	--	--	--	--	--	--	--	--	--	--	--	--	--	--	--	--	--	-	-	-	--	--	--	--	--	--	--	--	--	--	--	--	--	--	--	--	--	--	--
Unigene0000361	322	24	1.1021	gi|645265774|ref|XP_008238310.1|	69.7	3e-13	PREDICTED: uncharacterized protein LOC103336956 [Prunus mume]	--	--	--	--	--	--	--	--	--	--	--	--	--	--	--	-	-	-	17	102	DUF4283	Domain	58.7	2.9e-16	--	--	--	--	--	--	--	--	--	--	--	--	--
Unigene0000362	388	40	1.5244	--	--	--	--	--	--	--	--	--	--	--	--	--	--	--	--	--	--	--	-	-	-	--	--	--	--	--	--	--	--	--	--	--	--	--	--	--	--	--	--	--
Unigene0000363	305	0	0	gi|670384227|ref|XP_008672931.1|	71.2	5e-13	PREDICTED: peroxin Pex14 isoform X1 [Zea mays]	--	--	--	--	At2g17910	63.9	3e-12	KOG1075	FOG: Reverse transcriptase	--	--	--	--	--	--	-	GO:0097159//organic cyclic compound binding;GO:0005488//binding;GO:1901363//heterocyclic compound binding;GO:0036094//small molecule binding	-	2	66	zf-RVT	Domain	66.6	1.6e-18	--	--	--	--	--	--	--	--	--	--	--	--	--
Unigene0000364	304	0	0	gi|670384229|ref|XP_008672932.1|	71.2	5e-13	PREDICTED: peroxin Pex14 isoform X2 [Zea mays]	--	--	--	--	At2g17910	63.9	4e-12	KOG1075	FOG: Reverse transcriptase	--	--	--	--	--	--	-	GO:0005488//binding;GO:1901363//heterocyclic compound binding;GO:0097159//organic cyclic compound binding	-	2	66	zf-RVT	Domain	66.6	1.6e-18	--	--	--	--	--	--	--	--	--	--	--	--	--
Unigene0000365	380	27	1.0506	--	--	--	--	--	--	--	--	--	--	--	--	--	--	--	--	--	--	--	-	-	-	--	--	--	--	--	--	--	--	--	--	--	--	--	--	--	--	--	--	--
Unigene0000366	217	14	0.954	--	--	--	--	--	--	--	--	--	--	--	--	--	--	--	--	--	--	--	-	-	-	--	--	--	--	--	--	--	--	--	--	--	--	--	--	--	--	--	--	--
Unigene0000367	222	8	0.5328	gi|115472285|ref|NP_001059741.1|	150	3e-42	Os07g0507700 [Oryza sativa Japonica Group]	--	--	--	--	--	--	--	--	--	--	--	--	--	--	--	GO:0009987//cellular process;GO:0044260//cellular macromolecule metabolic process;GO:0010468//regulation of gene expression;GO:0009059//macromolecule biosynthetic process;GO:0044249//cellular biosynthetic process;GO:1901576//organic substance biosynthetic process;GO:0050789//regulation of biological process;GO:0065007//biological regulation;GO:0044237//cellular metabolic process;GO:0019222//regul…	-	GO:0043227//membrane-bounded organelle;GO:0044424//intracellular part;GO:0005623//cell;GO:0043231//intracellular membrane-bounded organelle;GO:0005622//intracellular;GO:0043226//organelle;GO:0043229//intracellular organelle;GO:0044464//cell part	--	--	--	--	--	--	--	--	--	--	--	--	--	--	--	--	--	--	--
Unigene0000368	250	18	1.0646	--	--	--	--	--	--	--	--	--	--	--	--	--	--	--	--	--	--	--	-	-	-	--	--	--	--	--	--	--	--	--	--	--	--	--	--	--	--	--	--	--
Unigene0000369	527	45	1.2626	--	--	--	--	--	--	--	--	--	--	--	--	--	--	--	--	--	--	--	-	-	-	--	--	--	--	--	--	--	--	--	--	--	--	--	--	--	--	--	--	--
Unigene0000370	423	35	1.2235	gi|449445794|ref|XP_004140657.1|	129	2e-33	PREDICTED: UPF0481 protein At3g47200 [Cucumis sativus]	sp|Q9SD53|Y3720_ARATH	66.6	4e-12	UPF0481 protein At3g47200 OS=Arabidopsis thaliana GN=At3g47200 PE=2 SV=1	--	--	--	--	--	--	--	--	--	--	--	-	-	-	2	106	DUF247	Family	96.3	1.7e-27	--	--	--	--	--	--	--	--	--	--	--	--	--
Unigene0000371	211	6	0.4205	--	--	--	--	--	--	--	--	--	--	--	--	--	--	--	--	--	--	--	-	-	-	--	--	--	--	--	--	--	--	--	--	--	--	--	--	--	--	--	--	--
Unigene0000372	756	50	0.9779	gi|659133015|ref|XP_008466509.1|	456	2e-156	PREDICTED: galactose oxidase-like [Cucumis melo]	--	--	--	--	--	--	--	--	--	--	--	--	--	--	--	-	GO:0003824//catalytic activity;GO:0016740//transferase activity;GO:0016765//transferase activity, transferring alkyl or aryl (other than methyl) groups	-	1	225	Glyoxal_oxid_N	Family	337.9	2.2e-101	--	--	--	--	--	--	--	--	--	--	--	--	--
Unigene0000373	243	12	0.7302	gi|700191500|gb|KGN46704.1|	50.4	2e-07	hypothetical protein Csa_6G124190 [Cucumis sativus]	--	--	--	--	--	--	--	--	--	--	--	--	--	--	--	-	-	-	--	--	--	--	--	--	--	--	--	--	--	--	--	--	--	--	--	--	--
Unigene0000374	254	0	0	gi|778680148|ref|XP_011651257.1|	75.1	1e-15	PREDICTED: probable 3-hydroxyisobutyrate dehydrogenase-like 3, mitochondrial [Cucumis sativus]	--	--	--	--	--	--	--	--	--	--	--	--	--	--	--	GO:0044237//cellular metabolic process;GO:0006139//nucleobase-containing compound metabolic process;GO:0072524//pyridine-containing compound metabolic process;GO:0009987//cellular process;GO:1901564//organonitrogen compound metabolic process;GO:0046496//nicotinamide nucleotide metabolic process;GO:0071704//organic substance metabolic process;GO:1901360//organic cyclic compound metabolic process;G…	GO:0097159//organic cyclic compound binding;GO:0016616//oxidoreductase activity, acting on the CH-OH group of donors, NAD or NADP as acceptor;GO:0003824//catalytic activity;GO:0036094//small molecule binding;GO:1901265//nucleoside phosphate binding;GO:0000166//nucleotide binding;GO:0005488//binding;GO:0016614//oxidoreductase activity, acting on CH-OH group of donors;GO:1901363//heterocyclic compo…	-	13	38	NAD_binding_2	Domain	26.7	3.8e-06	--	--	--	--	--	--	--	--	--	--	--	--	--
Unigene0000375	720	394	8.0915	gi|659112135|ref|XP_008456080.1|	363	4e-124	PREDICTED: probable 3-hydroxyisobutyrate dehydrogenase-like 3, mitochondrial [Cucumis melo]	sp|Q949M8|3HID3_ARATH	234	3e-74	Probable 3-hydroxyisobutyrate dehydrogenase-like 3, mitochondrial OS=Arabidopsis thaliana GN=At1g71180 PE=2 SV=1	At1g71180	234	3e-75	KOG0409	Predicted dehydrogenase	--	--	--	--	--	--	GO:0071704//organic substance metabolic process;GO:0044237//cellular metabolic process;GO:0019637//organophosphate metabolic process;GO:0009117//nucleotide metabolic process;GO:0006793//phosphorus metabolic process;GO:0006139//nucleobase-containing compound metabolic process;GO:0072524//pyridine-containing compound metabolic process;GO:0044699//single-organism process;GO:1901564//organonitrogen c…	GO:0000166//nucleotide binding;GO:0005488//binding;GO:1901265//nucleoside phosphate binding;GO:0097159//organic cyclic compound binding;GO:0016616//oxidoreductase activity, acting on the CH-OH group of donors, NAD or NADP as acceptor;GO:1901363//heterocyclic compound binding;GO:0036094//small molecule binding;GO:0016614//oxidoreductase activity, acting on CH-OH group of donors;GO:0048037//cofacto…	-	14	173	NAD_binding_2	Domain	152.9	5.8e-45	--	--	--	--	--	--	--	--	--	--	--	--	--
Unigene0000376	293	13	0.6561	--	--	--	--	--	--	--	--	--	--	--	--	--	--	--	--	--	--	--	-	-	-	--	--	--	--	--	--	--	--	--	--	--	--	--	--	--	--	--	--	--
Unigene0000377	346	189	8.0771	--	--	--	--	--	--	--	--	--	--	--	--	--	--	--	--	--	--	--	-	-	-	--	--	--	--	--	--	--	--	--	--	--	--	--	--	--	--	--	--	--
Unigene0000378	273	17	0.9208	--	--	--	--	--	--	--	--	--	--	--	--	--	--	--	--	--	--	--	-	-	-	--	--	--	--	--	--	--	--	--	--	--	--	--	--	--	--	--	--	--
Unigene0000379	439	31	1.0442	gi|38605755|emb|CAE04319.3|	133	4e-34	OSJNBb0016D16.10 [Oryza sativa Japonica Group]	sp|P92519|M810_ARATH	118	1e-31	Uncharacterized mitochondrial protein AtMg00810 OS=Arabidopsis thaliana GN=AtMg00810 PE=4 SV=1	At1g58889	132	4e-35	KOG0017	FOG: Transposon-encoded proteins with TYA, reverse transcriptase, integrase domains in various combinations	--	--	--	--	--	--	-	GO:1901363//heterocyclic compound binding;GO:0003824//catalytic activity;GO:0016772//transferase activity, transferring phosphorus-containing groups;GO:0016740//transferase activity;GO:0005488//binding;GO:0097159//organic cyclic compound binding	-	2	96	RVT_2	Family	94	6e-27	--	--	--	--	--	--	PRGDB00075483	Pth.17643	Putative_R-Genes,_predicted_from_NCBI_UniGene	Populus trichocarpa	N	1e-28	114
Unigene0000380	209	8	0.566	--	--	--	--	--	--	--	--	--	--	--	--	--	--	--	--	--	--	--	-	-	-	--	--	--	--	--	--	--	--	--	--	--	--	--	--	--	--	--	--	--
Unigene0000381	1903	11603	90.1569	gi|659090739|ref|XP_008446174.1|	884	0	PREDICTED: AP-1 complex subunit mu-2 [Cucumis melo]	sp|O22715|AP1M2_ARATH	831	0	AP-1 complex subunit mu-2 OS=Arabidopsis thaliana GN=AP1M2 PE=1 SV=1	At1g60780	831	0	KOG0937	Adaptor complexes medium subunit family	K12393//AP-1 complex subunit mu	0	884	csv:101219697	--	GO:0071702//organic substance transport;GO:0045184//establishment of protein localization;GO:0051234//establishment of localization;GO:0006810//transport;GO:0033036//macromolecule localization;GO:0051179//localization;GO:0015031//protein transport;GO:0008104//protein localization	-	GO:0044444//cytoplasmic part;GO:0005623//cell;GO:0032991//macromolecular complex;GO:0005622//intracellular;GO:0016020//membrane;GO:0044424//intracellular part;GO:0044464//cell part;GO:0043234//protein complex;GO:0044425//membrane part;GO:0005737//cytoplasm;GO:0030119//AP-type membrane coat adaptor complex;GO:0048475//coated membrane;GO:0030117//membrane coat	7|159	131|426	Clat_adaptor_s|Adap_comp_sub	Domain|Family	31.7|310.5	9.5e-08|6.6e-93	--	--	--	--	--	--	--	--	--	--	--	--	--
Unigene0000382	313	28	1.3228	--	--	--	--	--	--	--	--	--	--	--	--	--	--	--	--	--	--	--	-	-	-	--	--	--	--	--	--	--	--	--	--	--	--	--	--	--	--	--	--	--
Unigene0000383	359	19	0.7826	--	--	--	--	--	--	--	--	--	--	--	--	--	--	--	--	--	--	--	-	-	-	--	--	--	--	--	--	--	--	--	--	--	--	--	--	--	--	--	--	--
Unigene0000384	332	29	1.2916	--	--	--	--	--	--	--	--	--	--	--	--	--	--	--	--	--	--	--	-	-	-	--	--	--	--	--	--	--	--	--	--	--	--	--	--	--	--	--	--	--
Unigene0000385	215	11	0.7565	--	--	--	--	--	--	--	--	--	--	--	--	--	--	--	--	--	--	--	-	-	-	--	--	--	--	--	--	--	--	--	--	--	--	--	--	--	--	--	--	--
Unigene0000386	549	64	1.7238	--	--	--	--	--	--	--	--	--	--	--	--	--	--	--	--	--	--	--	-	-	-	--	--	--	--	--	--	--	--	--	--	--	--	--	--	--	--	--	--	--
Unigene0000387	681	403	8.7504	gi|728837157|gb|KHG16600.1|	90.1	1e-20	CTP-dependent diacylglycerol kinase 1 [Gossypium arboreum]	--	--	--	--	--	--	--	--	--	--	--	--	--	--	--	-	-	-	--	--	--	--	--	--	--	--	--	--	--	--	--	--	--	--	--	--	--
Unigene0000388	279	15	0.795	--	--	--	--	--	--	--	--	--	--	--	--	--	--	--	--	--	--	--	-	-	-	--	--	--	--	--	--	--	--	--	--	--	--	--	--	--	--	--	--	--
Unigene0000389	325	11	0.5005	--	--	--	--	--	--	--	--	--	--	--	--	--	--	--	--	--	--	--	-	-	-	--	--	--	--	--	--	--	--	--	--	--	--	--	--	--	--	--	--	--
Unigene0000390	220	8	0.5377	--	--	--	--	--	--	--	--	--	--	--	--	--	--	--	--	--	--	--	-	-	-	--	--	--	--	--	--	--	--	--	--	--	--	--	--	--	--	--	--	--
Unigene0000391	552	41	1.0983	--	--	--	--	--	--	--	--	--	--	--	--	--	--	--	--	--	--	--	-	-	-	--	--	--	--	--	--	--	--	--	--	--	--	--	--	--	--	--	--	--
Unigene0000392	476	0	0	--	--	--	--	--	--	--	--	--	--	--	--	--	--	--	--	--	--	--	-	-	-	--	--	--	--	--	--	--	--	--	--	--	--	--	--	--	--	--	--	--
Unigene0000393	228	11	0.7134	--	--	--	--	--	--	--	--	--	--	--	--	--	--	--	--	--	--	--	-	-	-	--	--	--	--	--	--	--	--	--	--	--	--	--	--	--	--	--	--	--
Unigene0000394	249	20	1.1877	--	--	--	--	--	--	--	--	--	--	--	--	--	--	--	--	--	--	--	-	-	-	--	--	--	--	--	--	--	--	--	--	--	--	--	--	--	--	--	--	--
Unigene0000395	255	10	0.5799	--	--	--	--	--	--	--	--	--	--	--	--	--	--	--	--	--	--	--	-	-	-	--	--	--	--	--	--	--	--	--	--	--	--	--	--	--	--	--	--	--
Unigene0000396	549	56	1.5083	--	--	--	--	--	--	--	--	--	--	--	--	--	--	--	--	--	--	--	-	-	-	--	--	--	--	--	--	--	--	--	--	--	--	--	--	--	--	--	--	--
Unigene0000397	280	32	1.6899	--	--	--	--	--	--	--	--	--	--	--	--	--	--	--	--	--	--	--	-	-	-	--	--	--	--	--	--	--	--	--	--	--	--	--	--	--	--	--	--	--
Unigene0000398	276	23	1.2322	--	--	--	--	--	--	--	--	--	--	--	--	--	--	--	--	--	--	--	-	-	-	--	--	--	--	--	--	--	--	--	--	--	--	--	--	--	--	--	--	--
Unigene0000399	221	12	0.8029	--	--	--	--	--	--	--	--	--	--	--	--	--	--	--	--	--	--	--	-	-	-	--	--	--	--	--	--	--	--	--	--	--	--	--	--	--	--	--	--	--
Unigene0000400	431	46	1.5781	--	--	--	--	--	--	--	--	--	--	--	--	--	--	--	--	--	--	--	-	-	-	--	--	--	--	--	--	--	--	--	--	--	--	--	--	--	--	--	--	--
Unigene0000401	215	10	0.6877	--	--	--	--	--	--	--	--	--	--	--	--	--	--	--	--	--	--	--	-	-	-	--	--	--	--	--	--	--	--	--	--	--	--	--	--	--	--	--	--	--
Unigene0000402	249	10	0.5938	--	--	--	--	--	--	--	--	--	--	--	--	--	--	--	--	--	--	--	-	-	-	--	--	--	--	--	--	--	--	--	--	--	--	--	--	--	--	--	--	--
Unigene0000403	264	0	0	gi|557478726|gb|AHA11525.1|	174	1e-53	PsbC, partial (chloroplast) [Persea americana]	sp|Q33C41|PSBC_NICTO	177	5e-53	Photosystem II CP43 reaction center protein OS=Nicotiana tomentosiformis GN=psbC PE=3 SV=1	--	--	--	--	--	K02705//photosystem II CP43 chlorophyll apoprotein	1e-52	177	gmx:3989283	ko00195//Photosynthesis//Energy metabolism//Metabolism	GO:0044710//single-organism metabolic process;GO:0022900//electron transport chain;GO:0043412//macromolecule modification;GO:0044238//primary metabolic process;GO:0044699//single-organism process;GO:0044267//cellular protein metabolic process;GO:0009987//cellular process;GO:0015979//photosynthesis;GO:0071704//organic substance metabolic process;GO:0009767//photosynthetic electron transport chain;…	GO:1901363//heterocyclic compound binding;GO:0009055//electron carrier activity;GO:0043167//ion binding;GO:0046906//tetrapyrrole binding;GO:0005488//binding;GO:0043169//cation binding;GO:0097159//organic cyclic compound binding	GO:0032991//macromolecular complex;GO:0044435//plastid part;GO:0044436//thylakoid part;GO:0009507//chloroplast;GO:0005623//cell;GO:0043227//membrane-bounded organelle;GO:0009536//plastid;GO:0044444//cytoplasmic part;GO:0044424//intracellular part;GO:0044422//organelle part;GO:0043226//organelle;GO:0044446//intracellular organelle part;GO:0044464//cell part;GO:0044425//membrane part;GO:0009521//ph…	1	87	PSII	Family	125.5	1.8e-36	--	--	--	--	--	--	--	--	--	--	--	--	--
Unigene0000404	453	57	1.8606	gi|374974664|gb|AFA27425.1|	306	1e-103	photosystem II CP43 chlorophyll apoprotein, partial [Flagellaria indica]	sp|Q09G50|PSBC_PLAOC	310	3e-103	Photosystem II CP43 reaction center protein OS=Platanus occidentalis GN=psbC PE=3 SV=1	--	--	--	--	--	K02705//photosystem II CP43 chlorophyll apoprotein	1e-102	310	rcu:RCOM_ORF00030	ko00195//Photosynthesis//Energy metabolism//Metabolism	GO:0055114//oxidation-reduction process;GO:0043170//macromolecule metabolic process;GO:0044237//cellular metabolic process;GO:0006464//cellular protein modification process;GO:0008152//metabolic process;GO:0044267//cellular protein metabolic process;GO:0044710//single-organism metabolic process;GO:0044260//cellular macromolecule metabolic process;GO:0044238//primary metabolic process;GO:0044763//…	GO:0005488//binding;GO:0097159//organic cyclic compound binding;GO:1901363//heterocyclic compound binding;GO:0043169//cation binding;GO:0043167//ion binding;GO:0046906//tetrapyrrole binding;GO:0009055//electron carrier activity	GO:0044436//thylakoid part;GO:0044424//intracellular part;GO:0043234//protein complex;GO:0043227//membrane-bounded organelle;GO:0005622//intracellular;GO:0009536//plastid;GO:0005623//cell;GO:0016020//membrane;GO:0005737//cytoplasm;GO:0009507//chloroplast;GO:0044435//plastid part;GO:0034357//photosynthetic membrane;GO:0044444//cytoplasmic part;GO:0044464//cell part;GO:0043229//intracellular organe…	1	149	PSII	Family	225.5	8.1e-67	--	--	--	--	--	--	--	--	--	--	--	--	--
Unigene0000405	279	30	1.59	--	--	--	--	--	--	--	--	--	--	--	--	--	--	--	--	--	--	--	-	-	-	--	--	--	--	--	--	--	--	--	--	--	--	--	--	--	--	--	--	--
Unigene0000406	321	22	1.0134	gi|299474487|gb|ADJ18449.1|	90.5	1e-19	gag/pol protein [Bryonia dioica]	--	--	--	--	--	--	--	--	--	--	--	--	--	--	--	-	-	-	--	--	--	--	--	--	--	--	--	--	--	--	--	--	--	--	--	--	--
Unigene0000407	1297	1125	12.8257	gi|590644139|ref|XP_007031000.1|	298	1e-114	T-box protein 41 [Theobroma cacao]	--	--	--	--	--	--	--	--	--	--	--	--	--	--	--	-	-	-	--	--	--	--	--	--	--	--	--	--	--	--	--	--	--	--	--	--	--
Unigene0000408	452	22	0.7197	gi|22296318|dbj|BAC10089.1|	66.6	5e-12	cyst nematode resistance protein-like protein [Oryza sativa Japonica Group]	--	--	--	--	At3g32110	48.9	8e-07	KOG1075	FOG: Reverse transcriptase	--	--	--	--	--	--	-	-	-	27	116	zf-RVT	Domain	61.7	5.5e-17	--	--	--	--	--	--	--	--	--	--	--	--	--
Unigene0000409	2181	0	0	gi|659075670|ref|XP_008438266.1|	1266	0	PREDICTED: NAD-dependent malic enzyme 62 kDa isoform, mitochondrial isoform X1 [Cucumis melo]	sp|Q9SIU0|MAO1_ARATH	1089	0	NAD-dependent malic enzyme 1, mitochondrial OS=Arabidopsis thaliana GN=NAD-ME1 PE=1 SV=1	At2g13560	1089	0	KOG1257	NADP+-dependent malic enzyme	K00028//malate dehydrogenase (decarboxylating) [EC:1.1.1.39]	0	1266	cmo:103483428	ko01200//Carbon metabolism//Global and Overview//Metabolism;ko00620//Pyruvate metabolism//Carbohydrate metabolism//Metabolism;ko00710//Carbon fixation in photosynthetic organisms//Energy metabolism//Metabolism	GO:0051179//localization;GO:1902578//single-organism localization;GO:0071704//organic substance metabolic process;GO:0042044//fluid transport;GO:0044699//single-organism process;GO:0006996//organelle organization;GO:0044237//cellular metabolic process;GO:0006810//transport;GO:0044765//single-organism transport;GO:0071840//cellular component organization or biogenesis;GO:0043436//oxoacid metabolic…	GO:0005515//protein binding;GO:0016614//oxidoreductase activity, acting on CH-OH group of donors;GO:0036094//small molecule binding;GO:0032550//purine ribonucleoside binding;GO:0046914//transition metal ion binding;GO:0032549//ribonucleoside binding;GO:0003824//catalytic activity;GO:0005488//binding;GO:0001883//purine nucleoside binding;GO:0046983//protein dimerization activity;GO:0016491//oxidor…	GO:0044424//intracellular part;GO:0043231//intracellular membrane-bounded organelle;GO:0043229//intracellular organelle;GO:0043226//organelle;GO:0005737//cytoplasm;GO:0044444//cytoplasmic part;GO:0005623//cell;GO:0044464//cell part;GO:0043227//membrane-bounded organelle;GO:0009536//plastid;GO:0005622//intracellular	124|314	304|581	malic|Malic_M	Domain|Domain	257.3|283.9	5.6e-77|1e-84	314	582	Malic_M	2.3e-89	297.8	--	--	--	--	--	--	--	--
Unigene0000410	2178	0	0	gi|659075670|ref|XP_008438266.1|	1270	0	PREDICTED: NAD-dependent malic enzyme 62 kDa isoform, mitochondrial isoform X1 [Cucumis melo]	sp|Q9SIU0|MAO1_ARATH	1093	0	NAD-dependent malic enzyme 1, mitochondrial OS=Arabidopsis thaliana GN=NAD-ME1 PE=1 SV=1	At2g13560	1093	0	KOG1257	NADP+-dependent malic enzyme	K00028//malate dehydrogenase (decarboxylating) [EC:1.1.1.39]	0	1270	cmo:103483428	ko01200//Carbon metabolism//Global and Overview//Metabolism;ko00620//Pyruvate metabolism//Carbohydrate metabolism//Metabolism;ko00710//Carbon fixation in photosynthetic organisms//Energy metabolism//Metabolism	GO:0044710//single-organism metabolic process;GO:0051234//establishment of localization;GO:0010038//response to metal ion;GO:0044281//small molecule metabolic process;GO:0050896//response to stimulus;GO:0006950//response to stress;GO:0019752//carboxylic acid metabolic process;GO:0044699//single-organism process;GO:0009628//response to abiotic stimulus;GO:0006970//response to osmotic stress;GO:000…	GO:0097367//carbohydrate derivative binding;GO:0032550//purine ribonucleoside binding;GO:0046914//transition metal ion binding;GO:1901363//heterocyclic compound binding;GO:0016614//oxidoreductase activity, acting on CH-OH group of donors;GO:0000166//nucleotide binding;GO:0001882//nucleoside binding;GO:0001883//purine nucleoside binding;GO:0097159//organic cyclic compound binding;GO:0016491//oxido…	GO:0043227//membrane-bounded organelle;GO:0005623//cell;GO:0009536//plastid;GO:0044444//cytoplasmic part;GO:0044424//intracellular part;GO:0005622//intracellular;GO:0044464//cell part;GO:0043229//intracellular organelle;GO:0043226//organelle;GO:0005737//cytoplasm;GO:0043231//intracellular membrane-bounded organelle	123|313	303|580	malic|Malic_M	Domain|Domain	257.3|283.9	5.6e-77|1e-84	313	581	Malic_M	2.3e-89	297.8	--	--	--	--	--	--	--	--
Unigene0000411	363	21	0.8554	gi|659109451|ref|XP_008454724.1|	122	2e-31	PREDICTED: coumaroyl-CoA:anthocyanidin 3-O-glucoside-6''-O-coumaroyltransferase 2-like isoform X1 [Cucumis melo]	sp|Q9ZWB4|3AT1_ARATH	89	4e-20	Coumaroyl-CoA:anthocyanidin 3-O-glucoside-6''-O-coumaroyltransferase 1 OS=Arabidopsis thaliana GN=3AT1 PE=1 SV=1	--	--	--	--	--	--	--	--	--	--	--	-	GO:0016740//transferase activity;GO:0003824//catalytic activity;GO:0016746//transferase activity, transferring acyl groups	-	4	97	Transferase	Family	38.2	5e-10	--	--	--	--	--	--	--	--	--	--	--	--	--
Unigene0000412	302	21	1.0282	--	--	--	--	--	--	--	--	--	--	--	--	--	--	--	--	--	--	--	-	-	-	--	--	--	--	--	--	--	--	--	--	--	--	--	--	--	--	--	--	--
Unigene0000413	2030	9160	66.7217	gi|778667301|ref|XP_011648904.1|	657	0	PREDICTED: S-adenosylmethionine decarboxylase proenzyme-like [Cucumis sativus]	sp|O24575|DCAM_MAIZE	431	3e-143	S-adenosylmethionine decarboxylase proenzyme OS=Zea mays GN=SAMDC PE=2 SV=1	At3g02470	355	3e-115	KOG0788	S-adenosylmethionine decarboxylase	K01611//S-adenosylmethionine decarboxylase [EC:4.1.1.50]	0	657	csv:101215844	ko00270//Cysteine and methionine metabolism//Amino acid metabolism//Metabolism;ko00330//Arginine and proline metabolism//Amino acid metabolism//Metabolism	GO:0044272//sulfur compound biosynthetic process;GO:0006596//polyamine biosynthetic process;GO:0044249//cellular biosynthetic process;GO:0009987//cellular process;GO:0071704//organic substance metabolic process;GO:1901576//organic substance biosynthetic process;GO:1901564//organonitrogen compound metabolic process;GO:0008152//metabolic process;GO:0042401//cellular biogenic amine biosynthetic proc…	GO:0016830//carbon-carbon lyase activity;GO:0003824//catalytic activity;GO:0016829//lyase activity;GO:0016831//carboxy-lyase activity	-	23	346	SAM_decarbox	Family	396.7	5.1e-119	--	--	--	--	--	--	--	--	--	--	--	--	--
Unigene0000414	1118	0	0	gi|778667301|ref|XP_011648904.1|	346	8e-114	PREDICTED: S-adenosylmethionine decarboxylase proenzyme-like [Cucumis sativus]	sp|O24575|DCAM_MAIZE	250	3e-77	S-adenosylmethionine decarboxylase proenzyme OS=Zea mays GN=SAMDC PE=2 SV=1	At3g02470	214	1e-64	KOG0788	S-adenosylmethionine decarboxylase	K01611//S-adenosylmethionine decarboxylase [EC:4.1.1.50]	3e-114	346	csv:101215844	ko00270//Cysteine and methionine metabolism//Amino acid metabolism//Metabolism;ko00330//Arginine and proline metabolism//Amino acid metabolism//Metabolism	GO:0006576//cellular biogenic amine metabolic process;GO:0006596//polyamine biosynthetic process;GO:1901566//organonitrogen compound biosynthetic process;GO:0009308//amine metabolic process;GO:0044272//sulfur compound biosynthetic process;GO:1901564//organonitrogen compound metabolic process;GO:0006807//nitrogen compound metabolic process;GO:0044106//cellular amine metabolic process;GO:0044271//c…	GO:0016829//lyase activity;GO:0016831//carboxy-lyase activity;GO:0003824//catalytic activity;GO:0016830//carbon-carbon lyase activity	-	23	186	SAM_decarbox	Family	222.1	6.3e-66	--	--	--	--	--	--	--	--	--	--	--	--	--
Unigene0000415	267	13	0.7199	--	--	--	--	--	--	--	--	--	--	--	--	--	--	--	--	--	--	--	-	-	-	--	--	--	--	--	--	--	--	--	--	--	--	--	--	--	--	--	--	--
Unigene0000416	251	23	1.3549	--	--	--	--	--	--	--	--	--	--	--	--	--	--	--	--	--	--	--	-	-	-	--	--	--	--	--	--	--	--	--	--	--	--	--	--	--	--	--	--	--
Unigene0000417	412	43	1.5433	gi|670384229|ref|XP_008672932.1|	63.9	3e-10	PREDICTED: peroxin Pex14 isoform X2 [Zea mays]	--	--	--	--	At2g01840	55.5	6e-09	KOG1075	FOG: Reverse transcriptase	--	--	--	--	--	--	-	-	-	2	66	zf-RVT	Domain	63.1	2e-17	--	--	--	--	--	--	--	--	--	--	--	--	--
Unigene0000418	233	13	0.825	--	--	--	--	--	--	--	--	--	--	--	--	--	--	--	--	--	--	--	-	-	-	--	--	--	--	--	--	--	--	--	--	--	--	--	--	--	--	--	--	--
Unigene0000419	467	31	0.9815	--	--	--	--	--	--	--	--	--	--	--	--	--	--	--	--	--	--	--	-	-	-	--	--	--	--	--	--	--	--	--	--	--	--	--	--	--	--	--	--	--
Unigene0000420	238	7	0.4349	gi|449433391|ref|XP_004134481.1|	158	3e-46	PREDICTED: protein SRG1 [Cucumis sativus]	sp|D4N501|DIOX2_PAPSO	67.4	3e-13	Probable 2-oxoglutarate/Fe(II)-dependent dioxygenase OS=Papaver somniferum GN=DIOX2 PE=2 SV=1	At3g21420	119	8e-33	KOG0143	Iron/ascorbate family oxidoreductases	--	--	--	--	--	--	GO:0008152//metabolic process;GO:1901576//organic substance biosynthetic process;GO:0009812//flavonoid metabolic process;GO:0009813//flavonoid biosynthetic process;GO:0046148//pigment biosynthetic process;GO:0051552//flavone metabolic process;GO:0044699//single-organism process;GO:0009058//biosynthetic process;GO:0051553//flavone biosynthetic process;GO:0044710//single-organism metabolic process;…	GO:0005488//binding;GO:0003824//catalytic activity;GO:0016491//oxidoreductase activity;GO:0043167//ion binding;GO:0051213//dioxygenase activity;GO:0016705//oxidoreductase activity, acting on paired donors, with incorporation or reduction of molecular oxygen;GO:0043169//cation binding;GO:0016706//oxidoreductase activity, acting on paired donors, with incorporation or reduction of molecular oxygen,…	-	1	33	2OG-FeII_Oxy	Domain	27.3	2.9e-06	--	--	--	--	--	--	--	--	--	--	--	--	--
Unigene0000421	1669	7380	65.3834	gi|659102070|ref|XP_008451937.1|	617	0	PREDICTED: cylicin-2 [Cucumis melo]	--	--	--	--	--	--	--	--	--	--	--	--	--	--	--	-	-	GO:0005623//cell;GO:0044444//cytoplasmic part;GO:0005737//cytoplasm;GO:0044464//cell part;GO:0044424//intracellular part;GO:0043229//intracellular organelle;GO:0043231//intracellular membrane-bounded organelle;GO:0005622//intracellular;GO:0043227//membrane-bounded organelle;GO:0043226//organelle	--	--	--	--	--	--	--	--	--	--	--	--	--	--	--	--	--	--	--
Unigene0000422	393	35	1.3169	--	--	--	--	--	--	--	--	--	--	--	--	--	--	--	--	--	--	--	-	-	-	--	--	--	--	--	--	--	--	--	--	--	--	--	--	--	--	--	--	--
Unigene0000423	478	28	0.8662	--	--	--	--	--	--	--	--	--	--	--	--	--	--	--	--	--	--	--	-	-	-	--	--	--	--	--	--	--	--	--	--	--	--	--	--	--	--	--	--	--
Unigene0000424	216	8	0.5477	--	--	--	--	--	--	--	--	--	--	--	--	--	--	--	--	--	--	--	-	-	-	--	--	--	--	--	--	--	--	--	--	--	--	--	--	--	--	--	--	--
Unigene0000425	255	12	0.6958	--	--	--	--	--	--	--	--	--	--	--	--	--	--	--	--	--	--	--	-	-	-	--	--	--	--	--	--	--	--	--	--	--	--	--	--	--	--	--	--	--
Unigene0000426	481	71	2.1826	gi|449445736|ref|XP_004140628.1|	160	5e-47	PREDICTED: ethylene-responsive transcription factor ERF039-like [Cucumis sativus]	sp|Q9M080|ERF43_ARATH	144	2e-41	Ethylene-responsive transcription factor ERF043 OS=Arabidopsis thaliana GN=ERF043 PE=2 SV=1	--	--	--	--	--	K09286//EREBP-like factor	2e-43	150	csv:101217333	--	GO:0044249//cellular biosynthetic process;GO:0044260//cellular macromolecule metabolic process;GO:0043170//macromolecule metabolic process;GO:0010468//regulation of gene expression;GO:1901576//organic substance biosynthetic process;GO:0019222//regulation of metabolic process;GO:0071704//organic substance metabolic process;GO:0065007//biological regulation;GO:0060255//regulation of macromolecule m…	GO:0097159//organic cyclic compound binding;GO:0005488//binding;GO:0003676//nucleic acid binding;GO:1901363//heterocyclic compound binding;GO:0001071//nucleic acid binding transcription factor activity	GO:0044424//intracellular part;GO:0043229//intracellular organelle;GO:0044464//cell part;GO:0005622//intracellular;GO:0005623//cell;GO:0043231//intracellular membrane-bounded organelle;GO:0043227//membrane-bounded organelle;GO:0043226//organelle	25	75	AP2	Domain	58.8	3.8e-16	26	88	AP2	3.8e-39	131.7	ERF	--	--	--	--	--	--	--
Unigene0000427	226	15	0.9814	gi|659120426|ref|XP_008460188.1|	53.9	2e-08	PREDICTED: ethylene-responsive transcription factor ERF039-like [Cucumis melo]	--	--	--	--	--	--	--	--	--	--	--	--	--	--	--	-	-	-	--	--	--	--	--	--	--	--	--	--	--	--	--	--	--	--	--	--	--
Unigene0000428	351	33	1.3902	--	--	--	--	--	--	--	--	--	--	--	--	--	--	--	--	--	--	--	-	-	-	--	--	--	--	--	--	--	--	--	--	--	--	--	--	--	--	--	--	--
Unigene0000429	206	11	0.7896	--	--	--	--	--	--	--	--	--	--	--	--	--	--	--	--	--	--	--	-	-	-	--	--	--	--	--	--	--	--	--	--	--	--	--	--	--	--	--	--	--
Unigene0000430	576	74	1.8997	gi|657402236|gb|AES60353.2|	191	3e-57	nucleotide-diphospho-sugar transferase family protein, partial [Medicago truncatula]	sp|Q3E6Y3|Y1869_ARATH	144	7e-40	Uncharacterized protein At1g28695 OS=Arabidopsis thaliana GN=At1g28695 PE=2 SV=1	--	--	--	--	--	--	--	--	--	--	--	-	-	-	4	117	Nucleotid_trans	Family	88.6	4.3e-25	--	--	--	--	--	--	--	--	--	--	--	--	--
Unigene0000431	469	0	0	gi|778719786|ref|XP_011658059.1|	166	5e-48	PREDICTED: cell number regulator 13 isoform X2 [Cucumis sativus]	sp|Q8L7E9|MCAC1_ARATH	139	6e-38	Protein MID1-COMPLEMENTING ACTIVITY 1 OS=Arabidopsis thaliana GN=MCA1 PE=1 SV=1	--	--	--	--	--	--	--	--	--	--	--	-	-	-	--	--	--	--	--	--	--	--	--	--	--	--	--	--	--	--	--	--	--
Unigene0000432	480	0	0	gi|778719786|ref|XP_011658059.1|	166	5e-48	PREDICTED: cell number regulator 13 isoform X2 [Cucumis sativus]	sp|Q8L7E9|MCAC1_ARATH	139	7e-38	Protein MID1-COMPLEMENTING ACTIVITY 1 OS=Arabidopsis thaliana GN=MCA1 PE=1 SV=1	--	--	--	--	--	--	--	--	--	--	--	-	-	-	--	--	--	--	--	--	--	--	--	--	--	--	--	--	--	--	--	--	--
Unigene0000433	492	59	1.7732	--	--	--	--	--	--	--	--	--	--	--	--	--	--	--	--	--	--	--	-	-	-	--	--	--	--	--	--	--	--	--	--	--	--	--	--	--	--	--	--	--
Unigene0000434	353	49	2.0525	gi|22859203|emb|CAD45567.1|	68.9	2e-13	reverse transcriptase [Elaeis guineensis]	sp|P31843|RRPO_OENBE	50.8	1e-07	RNA-directed DNA polymerase homolog OS=Oenothera berteroana PE=4 SV=1	At2g06170	51.2	8e-08	KOG0017	FOG: Transposon-encoded proteins with TYA, reverse transcriptase, integrase domains in various combinations	--	--	--	--	--	--	GO:0044260//cellular macromolecule metabolic process;GO:0046483//heterocycle metabolic process;GO:0044238//primary metabolic process;GO:0071704//organic substance metabolic process;GO:0009059//macromolecule biosynthetic process;GO:0006260//DNA replication;GO:0034641//cellular nitrogen compound metabolic process;GO:0034645//cellular macromolecule biosynthetic process;GO:0006139//nucleobase-contain…	GO:0003824//catalytic activity;GO:0043169//cation binding;GO:0016779//nucleotidyltransferase activity;GO:0008233//peptidase activity;GO:0097159//organic cyclic compound binding;GO:0016740//transferase activity;GO:0046914//transition metal ion binding;GO:0043167//ion binding;GO:0046872//metal ion binding;GO:0070011//peptidase activity, acting on L-amino acid peptides;GO:0005488//binding;GO:0016772…	-	--	--	--	--	--	--	--	--	--	--	--	--	--	--	--	--	--	--	--
Unigene0000435	289	25	1.2791	--	--	--	--	--	--	--	--	--	--	--	--	--	--	--	--	--	--	--	-	-	-	--	--	--	--	--	--	--	--	--	--	--	--	--	--	--	--	--	--	--
Unigene0000436	245	8	0.4828	gi|449450560|ref|XP_004143030.1|	73.6	7e-16	PREDICTED: V-type proton ATPase subunit G3 [Cucumis sativus]	sp|Q9SZH0|VATG3_ARATH	52.4	1e-08	V-type proton ATPase subunit G3 OS=Arabidopsis thaliana GN=VHA-G3 PE=3 SV=1	At4g25950	52.4	1e-09	KOG1772	Vacuolar H+-ATPase V1 sector, subunit G	K02152//V-type H+-transporting ATPase subunit G	3e-16	73.6	csv:101222806	ko00190//Oxidative phosphorylation//Energy metabolism//Metabolism;ko04145//Phagosome//Transport and catabolism//Cellular Processes	GO:0051234//establishment of localization;GO:0044763//single-organism cellular process;GO:1902578//single-organism localization;GO:0009987//cellular process;GO:0006818//hydrogen transport;GO:0044765//single-organism transport;GO:0006810//transport;GO:0044699//single-organism process;GO:0051179//localization	GO:0022857//transmembrane transporter activity;GO:0005215//transporter activity	GO:0005623//cell;GO:0043226//organelle;GO:0044424//intracellular part;GO:0032991//macromolecular complex;GO:0043229//intracellular organelle;GO:0044425//membrane part;GO:0044422//organelle part;GO:0016020//membrane;GO:0043231//intracellular membrane-bounded organelle;GO:0033176//proton-transporting V-type ATPase complex;GO:0031090//organelle membrane;GO:0043234//protein complex;GO:0016469//proton…	3	44	V-ATPase_G	Family	28.1	1.7e-06	--	--	--	--	--	--	--	--	--	--	--	--	--
Unigene0000437	257	8	0.4603	--	--	--	--	--	--	--	--	--	--	--	--	--	--	--	--	--	--	--	-	-	-	--	--	--	--	--	--	--	--	--	--	--	--	--	--	--	--	--	--	--
Unigene0000438	992	98	1.4608	gi|399920210|gb|AFP55557.1|	162	2e-41	non-ltr retroelement reverse transcriptase [Rosa rugosa]	sp|P14381|YTX2_XENLA	62.4	3e-09	Transposon TX1 uncharacterized 149 kDa protein OS=Xenopus laevis PE=3 SV=1	At1g47910	125	8e-31	KOG1075	FOG: Reverse transcriptase	--	--	--	--	--	--	-	-	-	--	--	--	--	--	--	--	--	--	--	--	--	--	--	--	--	--	--	--
Unigene0000439	243	10	0.6085	--	--	--	--	--	--	--	--	--	--	--	--	--	--	--	--	--	--	--	-	-	-	--	--	--	--	--	--	--	--	--	--	--	--	--	--	--	--	--	--	--
Unigene0000440	828	6	0.1071	gi|659092465|ref|XP_008447074.1|	320	2e-101	PREDICTED: ent-kaur-16-ene synthase, chloroplastic isoform X4 [Cucumis melo]	sp|Q39548|KSB_CUCMA	295	6e-92	Ent-kaur-16-ene synthase, chloroplastic OS=Cucurbita maxima PE=1 SV=1	--	--	--	--	--	K04121//ent-kaurene synthase [EC:4.2.3.19]	8e-101	321	cmo:103489622	ko00904//Diterpenoid biosynthesis//Metabolism of terpenoids and polyketides//Metabolism	-	GO:0043169//cation binding;GO:0010333//terpene synthase activity;GO:0016835//carbon-oxygen lyase activity;GO:0003824//catalytic activity;GO:0046872//metal ion binding;GO:0016838//carbon-oxygen lyase activity, acting on phosphates;GO:0043167//ion binding;GO:0005488//binding;GO:0016829//lyase activity	-	16	249	Terpene_synth_C	Domain	178.8	1.1e-52	--	--	--	--	--	--	--	--	--	--	--	--	--
Unigene0000441	1166	48	0.6087	gi|659092465|ref|XP_008447074.1|	482	2e-162	PREDICTED: ent-kaur-16-ene synthase, chloroplastic isoform X4 [Cucumis melo]	sp|Q39548|KSB_CUCMA	464	2e-155	Ent-kaur-16-ene synthase, chloroplastic OS=Cucurbita maxima PE=1 SV=1	--	--	--	--	--	K04121//ent-kaurene synthase [EC:4.2.3.19]	3e-161	483	cmo:103489622	ko00904//Diterpenoid biosynthesis//Metabolism of terpenoids and polyketides//Metabolism	GO:0044763//single-organism cellular process;GO:0008152//metabolic process;GO:0044699//single-organism process;GO:0009987//cellular process	GO:0016835//carbon-oxygen lyase activity;GO:0003824//catalytic activity;GO:0046872//metal ion binding;GO:0043167//ion binding;GO:0016829//lyase activity;GO:0005488//binding;GO:0016838//carbon-oxygen lyase activity, acting on phosphates;GO:0043169//cation binding;GO:0010333//terpene synthase activity	GO:0044424//intracellular part;GO:0005737//cytoplasm;GO:0043231//intracellular membrane-bounded organelle;GO:0044444//cytoplasmic part;GO:0043227//membrane-bounded organelle;GO:0043229//intracellular organelle;GO:0005623//cell;GO:0009536//plastid;GO:0005622//intracellular;GO:0044464//cell part;GO:0043226//organelle	2|143	95|376	Terpene_synth|Terpene_synth_C	Domain|Domain	70.5|176.9	1e-19|4e-52	--	--	--	--	--	--	--	--	--	--	--	--	--
Unigene0000442	470	38	1.1955	--	--	--	--	--	--	--	--	--	--	--	--	--	--	--	--	--	--	--	-	-	-	--	--	--	--	--	--	--	--	--	--	--	--	--	--	--	--	--	--	--
Unigene0000443	469	71	2.2385	gi|449448162|ref|XP_004141835.1|	182	4e-52	PREDICTED: ankyrin repeat-containing protein At5g02620-like [Cucumis sativus]	--	--	--	--	--	--	--	--	--	--	--	--	--	--	--	-	-	-	--	--	--	--	--	--	--	--	--	--	--	--	--	--	--	--	--	--	--
Unigene0000444	350	2	0.0845	--	--	--	--	--	--	--	--	--	--	--	--	--	--	--	--	--	--	--	-	-	-	--	--	--	--	--	--	--	--	--	--	--	--	--	--	--	--	--	--	--
Unigene0000445	646	60	1.3734	gi|674921246|emb|CDY11851.1|	53.1	6e-07	BnaC03g12770D [Brassica napus]	--	--	--	--	--	--	--	--	--	--	--	--	--	--	--	-	-	-	--	--	--	--	--	--	--	--	--	--	--	--	--	--	--	--	--	--	--
Unigene0000446	840	3017	53.1084	gi|566150636|ref|XP_006369478.1|	236	1e-75	calcium-binding EF hand family protein [Populus trichocarpa]	--	--	--	--	--	--	--	--	--	--	--	--	--	--	--	-	GO:0005488//binding;GO:0046872//metal ion binding;GO:0043167//ion binding;GO:0043169//cation binding	GO:0005622//intracellular;GO:0044464//cell part;GO:0044424//intracellular part;GO:0005737//cytoplasm;GO:0005623//cell;GO:0044444//cytoplasmic part	26	96	EF_hand_5	Domain	43.3	2.6e-11	24|74	52|101	EFh|EFh	3.3e-14|3.3e-14	49.5|49.5	--	--	--	--	--	--	--	--
Unigene0000447	463	79	2.523	gi|659074176|ref|XP_008437463.1|	230	8e-73	PREDICTED: naringenin,2-oxoglutarate 3-dioxygenase-like [Cucumis melo]	sp|P28038|FL3H_HORVU	70.5	2e-13	Naringenin,2-oxoglutarate 3-dioxygenase OS=Hordeum vulgare PE=2 SV=1	At4g10490	180	8e-55	KOG0143	Iron/ascorbate family oxidoreductases	--	--	--	--	--	--	GO:0044699//single-organism process;GO:0008152//metabolic process;GO:0044710//single-organism metabolic process	GO:0051213//dioxygenase activity;GO:0016705//oxidoreductase activity, acting on paired donors, with incorporation or reduction of molecular oxygen;GO:0043167//ion binding;GO:0046914//transition metal ion binding;GO:0046872//metal ion binding;GO:0003824//catalytic activity;GO:0043169//cation binding;GO:0005488//binding;GO:0016491//oxidoreductase activity;GO:0016706//oxidoreductase activity, acting…	-	47	135	DIOX_N	Family	77.3	1.1e-21	--	--	--	--	--	--	--	--	--	--	--	--	--
Unigene0000448	356	24	0.9968	--	--	--	--	--	--	--	--	--	--	--	--	--	--	--	--	--	--	--	-	-	-	--	--	--	--	--	--	--	--	--	--	--	--	--	--	--	--	--	--	--
Unigene0000449	402	44	1.6184	--	--	--	--	--	--	--	--	--	--	--	--	--	--	--	--	--	--	--	-	-	-	--	--	--	--	--	--	--	--	--	--	--	--	--	--	--	--	--	--	--
Unigene0000450	419	27	0.9528	gi|731338584|ref|XP_010680400.1|	97.4	2e-21	PREDICTED: transposon Tf2-1 polyprotein isoform X1 [Beta vulgaris subsp. vulgaris]	--	--	--	--	At2g14640_2	58.2	4e-10	KOG0017	FOG: Transposon-encoded proteins with TYA, reverse transcriptase, integrase domains in various combinations	--	--	--	--	--	--	-	-	-	--	--	--	--	--	--	--	--	--	--	--	--	--	--	--	--	--	--	--
Unigene0000451	526	26	0.7309	gi|658057654|ref|XP_008364610.1|	52.4	3e-06	PREDICTED: putative ribonuclease H protein At1g65750 [Malus domestica]	--	--	--	--	--	--	--	--	--	--	--	--	--	--	--	-	-	-	--	--	--	--	--	--	--	--	--	--	--	--	--	--	--	--	--	--	--
Unigene0000452	709	65	1.3556	gi|568881592|ref|XP_006493639.1|	256	2e-75	PREDICTED: LRR receptor-like serine/threonine-protein kinase GSO1-like [Citrus sinensis]	sp|P04146|COPIA_DROME	162	3e-43	Copia protein OS=Drosophila melanogaster GN=GIP PE=1 SV=3	At2g04820	225	2e-70	KOG0017	FOG: Transposon-encoded proteins with TYA, reverse transcriptase, integrase domains in various combinations	--	--	--	--	--	--	-	GO:0005488//binding;GO:0043167//ion binding	-	--	--	--	--	--	--	--	--	--	--	--	--	PRGDB00061522	disease resistance protein	Putative_R-Genes,_collected_from_NCBI_Protein	Brassica rapa subsp. pekinensis	NL	2e-61	213
Unigene0000453	271	13	0.7093	gi|659094108|ref|XP_008447888.1|	147	2e-42	PREDICTED: expansin-like A3 isoform X3 [Cucumis melo]	sp|Q7XCL0|EXLA2_ORYSJ	85.5	5e-20	Expansin-like A2 OS=Oryza sativa subsp. japonica GN=EXLA2 PE=2 SV=1	--	--	--	--	--	--	--	--	--	--	--	GO:0000003//reproduction	-	-	58	82	DPBB_1	Domain	26.5	4.4e-06	57	88	DPBB_1	1.1e-07	29.2	--	--	--	--	--	--	--	--
Unigene0000454	235	17	1.0697	gi|442803167|gb|AGC78902.1|	71.2	9e-19	hypothetical protein (mitochondrion) [Vicia faba]	--	--	--	--	--	--	--	--	--	--	--	--	--	--	--	-	-	GO:0043231//intracellular membrane-bounded organelle;GO:0044464//cell part;GO:0043227//membrane-bounded organelle;GO:0043229//intracellular organelle;GO:0005622//intracellular;GO:0005623//cell;GO:0043226//organelle;GO:0044424//intracellular part	--	--	--	--	--	--	--	--	--	--	--	--	--	--	--	--	--	--	--
Unigene0000455	415	57	2.0309	gi|659107402|ref|XP_008453655.1|	173	5e-49	PREDICTED: glutamate receptor 2.7-like [Cucumis melo]	sp|Q8LGN0|GLR27_ARATH	84.3	6e-18	Glutamate receptor 2.7 OS=Arabidopsis thaliana GN=GLR2.7 PE=2 SV=3	At2g29120	84.3	9e-19	KOG1052	Glutamate-gated kainate-type ion channel receptor subunit GluR5 and related subunits	K05387//glutamate receptor, ionotropic, plant	2e-49	173	cmo:103494308	--	GO:0044699//single-organism process	-	-	--	--	--	--	--	--	--	--	--	--	--	--	--	--	--	--	--	--	--
Unigene0000456	685	2	0.0432	gi|53749404|gb|AAU90262.1|	229	6e-67	integrase core domain containing protein [Oryza sativa Japonica Group]	sp|P10978|POLX_TOBAC	124	3e-30	Retrovirus-related Pol polyprotein from transposon TNT 1-94 OS=Nicotiana tabacum PE=2 SV=1	At1g44510	207	5e-60	KOG0017	FOG: Transposon-encoded proteins with TYA, reverse transcriptase, integrase domains in various combinations	--	--	--	--	--	--	GO:0006139//nucleobase-containing compound metabolic process;GO:0046483//heterocycle metabolic process;GO:0044260//cellular macromolecule metabolic process;GO:0008152//metabolic process;GO:0090304//nucleic acid metabolic process;GO:0044238//primary metabolic process;GO:0009987//cellular process;GO:1901360//organic cyclic compound metabolic process;GO:0006807//nitrogen compound metabolic process;G…	GO:0097159//organic cyclic compound binding;GO:1901363//heterocyclic compound binding;GO:0005488//binding;GO:0003676//nucleic acid binding	GO:0043229//intracellular organelle;GO:0005623//cell;GO:0005622//intracellular;GO:0044464//cell part;GO:0043227//membrane-bounded organelle;GO:0044424//intracellular part;GO:0043231//intracellular membrane-bounded organelle;GO:0043226//organelle	2	76	rve	Domain	65.9	3.1e-18	--	--	--	--	--	--	PRGDB00061522	disease resistance protein	Putative_R-Genes,_collected_from_NCBI_Protein	Brassica rapa subsp. pekinensis	NL	7e-52	184
Unigene0000457	1654	233	2.083	gi|734411770|gb|KHN36156.1|	490	1e-155	Retrovirus-related Pol polyprotein from transposon TNT 1-94, partial [Glycine soja]	sp|P10978|POLX_TOBAC	277	8e-80	Retrovirus-related Pol polyprotein from transposon TNT 1-94 OS=Nicotiana tabacum PE=2 SV=1	At1g44510	443	2e-139	KOG0017	FOG: Transposon-encoded proteins with TYA, reverse transcriptase, integrase domains in various combinations	--	--	--	--	--	--	GO:0046483//heterocycle metabolic process;GO:0006807//nitrogen compound metabolic process;GO:0034641//cellular nitrogen compound metabolic process;GO:0071704//organic substance metabolic process;GO:1901360//organic cyclic compound metabolic process;GO:0044237//cellular metabolic process;GO:0044260//cellular macromolecule metabolic process;GO:0044238//primary metabolic process;GO:0006259//DNA meta…	GO:0005488//binding;GO:1901363//heterocyclic compound binding;GO:0097159//organic cyclic compound binding;GO:0003676//nucleic acid binding	-	2|378	76|550	rve|RVT_2	Domain|Family	63.3|246.7	2e-17|1.4e-73	--	--	--	--	--	--	PRGDB00061522	disease resistance protein	Putative_R-Genes,_collected_from_NCBI_Protein	Brassica rapa subsp. pekinensis	NL	3e-109	363
Unigene0000458	454	30	0.9771	--	--	--	--	--	--	--	--	--	--	--	--	--	--	--	--	--	--	--	-	-	-	--	--	--	--	--	--	--	--	--	--	--	--	--	--	--	--	--	--	--
Unigene0000459	263	15	0.8433	--	--	--	--	--	--	--	--	--	--	--	--	--	--	--	--	--	--	--	-	-	-	--	--	--	--	--	--	--	--	--	--	--	--	--	--	--	--	--	--	--
Unigene0000460	235	8	0.5034	--	--	--	--	--	--	--	--	--	--	--	--	--	--	--	--	--	--	--	-	-	-	--	--	--	--	--	--	--	--	--	--	--	--	--	--	--	--	--	--	--
Unigene0000461	725	69	1.4073	gi|659083382|ref|XP_008442325.1|	441	2e-151	PREDICTED: pentatricopeptide repeat-containing protein At5g15300-like [Cucumis melo]	sp|Q56X05|PPR15_ARATH	194	2e-56	Pentatricopeptide repeat-containing protein At1g06145 OS=Arabidopsis thaliana GN=EMB1444 PE=2 SV=2	At1g06150_2	194	1e-57	KOG4197	FOG: PPR repeat	--	--	--	--	--	--	-	GO:0042623//ATPase activity, coupled;GO:0017111//nucleoside-triphosphatase activity;GO:0016462//pyrophosphatase activity;GO:0016787//hydrolase activity;GO:0003824//catalytic activity;GO:0016887//ATPase activity;GO:0016817//hydrolase activity, acting on acid anhydrides;GO:0016818//hydrolase activity, acting on acid anhydrides, in phosphorus-containing anhydrides	-	32|92|167|196	59|139|192|221	PPR|PPR_2|PPR|PPR	Family|Repeat|Family|Family	18.5|43.5|19.2|27.5	0.0012|2e-11|0.00073|1.6e-06	--	--	--	--	--	--	PRGDB00183352	GSVIVT01015461001	Putative_R-Genes,_predicted_from_Pythozome	Vitis vinifera	N	2e-36	141
Unigene0000462	231	14	0.8962	--	--	--	--	--	--	--	--	--	--	--	--	--	--	--	--	--	--	--	-	-	-	--	--	--	--	--	--	--	--	--	--	--	--	--	--	--	--	--	--	--
Unigene0000463	225	0	0	--	--	--	--	--	--	--	--	--	--	--	--	--	--	--	--	--	--	--	-	-	-	--	--	--	--	--	--	--	--	--	--	--	--	--	--	--	--	--	--	--
Unigene0000464	246	4	0.2404	--	--	--	--	--	--	--	--	--	--	--	--	--	--	--	--	--	--	--	-	-	-	--	--	--	--	--	--	--	--	--	--	--	--	--	--	--	--	--	--	--
Unigene0000465	1588	754	7.0208	gi|659086213|ref|XP_008443815.1|	874	0	PREDICTED: UDP-glucuronate 4-epimerase 1-like [Cucumis melo]	sp|Q9M0B6|GAE1_ARATH	753	0	UDP-glucuronate 4-epimerase 1 OS=Arabidopsis thaliana GN=GAE1 PE=1 SV=1	At4g30440	753	0	KOG1371	UDP-glucose 4-epimerase/UDP-sulfoquinovose synthase	K08679//UDP-glucuronate 4-epimerase [EC:5.1.3.6]	0	874	cmo:103487319	ko00500//Starch and sucrose metabolism//Carbohydrate metabolism//Metabolism;ko00520//Amino sugar and nucleotide sugar metabolism//Carbohydrate metabolism//Metabolism	GO:0044238//primary metabolic process;GO:0008152//metabolic process	GO:0003824//catalytic activity;GO:0048037//cofactor binding;GO:0005488//binding;GO:0016857//racemase and epimerase activity, acting on carbohydrates and derivatives;GO:0016854//racemase and epimerase activity;GO:0016853//isomerase activity	GO:0043229//intracellular organelle;GO:0044446//intracellular organelle part;GO:0031224//intrinsic component of membrane;GO:0031984//organelle subcompartment;GO:0012505//endomembrane system;GO:0005622//intracellular;GO:0044422//organelle part;GO:0044464//cell part;GO:0044425//membrane part;GO:0016020//membrane;GO:0000139//Golgi membrane;GO:0031090//organelle membrane;GO:0044431//Golgi apparatus p…	94	326	Epimerase	Family	161.4	2e-47	--	--	--	--	--	--	--	--	--	--	--	--	--
Unigene0000466	390	22	0.8341	gi|778670174|ref|XP_011649391.1|	204	3e-61	PREDICTED: terpene synthase 10 [Cucumis sativus]	sp|Q93X23|MYRS_QUEIL	149	2e-41	Myrcene synthase, chloroplastic OS=Quercus ilex PE=1 SV=1	--	--	--	--	--	--	--	--	--	--	--	GO:0008152//metabolic process	GO:0016829//lyase activity;GO:0016835//carbon-oxygen lyase activity;GO:0043167//ion binding;GO:0043169//cation binding;GO:0003824//catalytic activity;GO:0005488//binding;GO:0016838//carbon-oxygen lyase activity, acting on phosphates;GO:0046872//metal ion binding;GO:0010333//terpene synthase activity	GO:0005623//cell;GO:0043227//membrane-bounded organelle;GO:0005737//cytoplasm;GO:0043229//intracellular organelle;GO:0043226//organelle;GO:0044464//cell part;GO:0043231//intracellular membrane-bounded organelle;GO:0044424//intracellular part;GO:0005622//intracellular;GO:0044444//cytoplasmic part;GO:0009536//plastid	3	129	Terpene_synth	Domain	133.4	4.9e-39	--	--	--	--	--	--	--	--	--	--	--	--	--
Unigene0000467	1196	0	0	gi|659068958|ref|XP_008447461.1|	517	2e-173	PREDICTED: probable GPI-anchored adhesin-like protein PGA55 isoform X2 [Cucumis melo]	--	--	--	--	--	--	--	--	--	--	--	--	--	--	--	-	-	-	--	--	--	--	--	--	--	--	--	--	--	--	--	--	--	--	--	--	--
Unigene0000468	1477	56	0.5606	gi|659068958|ref|XP_008447461.1|	650	0	PREDICTED: probable GPI-anchored adhesin-like protein PGA55 isoform X2 [Cucumis melo]	--	--	--	--	--	--	--	--	--	--	--	--	--	--	--	-	-	-	369	476	DUF4378	Family	74.6	8e-21	--	--	--	--	--	--	--	--	--	--	--	--	--
Unigene0000469	1041	1699	24.1329	gi|659110635|ref|XP_008455330.1|	493	6e-174	PREDICTED: expansin-B3-like [Cucumis melo]	sp|Q9M0I2|EXPB3_ARATH	386	9e-133	Expansin-B3 OS=Arabidopsis thaliana GN=EXPB3 PE=2 SV=2	--	--	--	--	--	--	--	--	--	--	--	GO:0000003//reproduction	-	-	73|165	151|246	DPBB_1|Pollen_allerg_1	Domain|Domain	66.9|117.5	1.1e-18|1.5e-34	72	140	DPBB_1	5.2e-16	56.5	--	--	--	--	--	--	--	--
Unigene0000470	476	44	1.3668	--	--	--	--	--	--	--	--	--	--	--	--	--	--	--	--	--	--	--	-	-	-	--	--	--	--	--	--	--	--	--	--	--	--	--	--	--	--	--	--	--
Unigene0000471	347	7	0.2983	--	--	--	--	--	--	--	--	--	--	--	--	--	--	--	--	--	--	--	-	-	-	--	--	--	--	--	--	--	--	--	--	--	--	--	--	--	--	--	--	--
Unigene0000472	261	19	1.0764	--	--	--	--	--	--	--	--	--	--	--	--	--	--	--	--	--	--	--	-	-	-	--	--	--	--	--	--	--	--	--	--	--	--	--	--	--	--	--	--	--
Unigene0000473	219	11	0.7427	--	--	--	--	--	--	--	--	--	--	--	--	--	--	--	--	--	--	--	-	-	-	--	--	--	--	--	--	--	--	--	--	--	--	--	--	--	--	--	--	--
Unigene0000474	229	5	0.3229	--	--	--	--	--	--	--	--	--	--	--	--	--	--	--	--	--	--	--	-	-	-	--	--	--	--	--	--	--	--	--	--	--	--	--	--	--	--	--	--	--
Unigene0000475	251	15	0.8837	--	--	--	--	--	--	--	--	--	--	--	--	--	--	--	--	--	--	--	-	-	-	--	--	--	--	--	--	--	--	--	--	--	--	--	--	--	--	--	--	--
Unigene0000476	277	16	0.8541	--	--	--	--	--	--	--	--	--	--	--	--	--	--	--	--	--	--	--	-	-	-	--	--	--	--	--	--	--	--	--	--	--	--	--	--	--	--	--	--	--
Unigene0000477	850	3689	64.1737	gi|449438264|ref|XP_004136909.1|	353	1e-120	PREDICTED: peptide methionine sulfoxide reductase B5 [Cucumis sativus]	sp|Q9C5C8|MSRB2_ARATH	243	2e-78	Peptide methionine sulfoxide reductase B2, chloroplastic OS=Arabidopsis thaliana GN=MSRB2 PE=1 SV=1	At4g04800	227	8e-74	KOG0856	Predicted pilin-like transcription factor	K07305//peptide-methionine (R)-S-oxide reductase [EC:1.8.4.12]	4e-121	353	csv:101207895	--	GO:0009266//response to temperature stimulus;GO:0008152//metabolic process;GO:0006979//response to oxidative stress;GO:0044699//single-organism process;GO:0009409//response to cold;GO:0043170//macromolecule metabolic process;GO:0006643//membrane lipid metabolic process;GO:0009415//response to water;GO:0044763//single-organism cellular process;GO:0009991//response to extracellular stimulus;GO:0031…	GO:0003824//catalytic activity;GO:0016491//oxidoreductase activity;GO:0016667//oxidoreductase activity, acting on a sulfur group of donors;GO:0005488//binding;GO:0016671//oxidoreductase activity, acting on a sulfur group of donors, disulfide as acceptor;GO:0043169//cation binding;GO:0043167//ion binding	GO:0043227//membrane-bounded organelle;GO:0005623//cell;GO:0044464//cell part;GO:0043226//organelle;GO:0043231//intracellular membrane-bounded organelle;GO:0044424//intracellular part;GO:0043229//intracellular organelle;GO:0005622//intracellular	89	208	SelR	Family	164.6	6.2e-49	--	--	--	--	--	--	--	--	--	--	--	--	--
Unigene0000478	813	167	3.0373	--	--	--	--	--	--	--	--	--	--	--	--	--	--	--	--	--	--	--	-	-	-	--	--	--	--	--	--	--	--	--	--	--	--	--	--	--	--	--	--	--
Unigene0000479	490	99	2.9875	gi|565403877|ref|XP_006367379.1|	74.3	2e-15	PREDICTED: CLAVATA3/ESR (CLE)-related protein 45-like [Solanum tuberosum]	--	--	--	--	--	--	--	--	--	--	--	--	--	--	--	-	-	-	--	--	--	--	--	--	--	--	--	--	--	--	--	--	--	--	--	--	--
Unigene0000480	366	27	1.0908	--	--	--	--	--	--	--	--	--	--	--	--	--	--	--	--	--	--	--	-	-	-	--	--	--	--	--	--	--	--	--	--	--	--	--	--	--	--	--	--	--
Unigene0000481	1044	29	0.4107	gi|659125278|ref|XP_008462605.1|	491	5e-173	PREDICTED: secoisolariciresinol dehydrogenase-like [Cucumis melo]	sp|Q94KL7|SILD_FORIN	271	3e-87	Secoisolariciresinol dehydrogenase (Fragment) OS=Forsythia intermedia PE=1 SV=1	At3g26770	248	3e-79	KOG0725	Reductases with broad range of substrate specificities	--	--	--	--	--	--	GO:0044699//single-organism process;GO:0008152//metabolic process;GO:0044710//single-organism metabolic process	GO:0016616//oxidoreductase activity, acting on the CH-OH group of donors, NAD or NADP as acceptor;GO:0003824//catalytic activity;GO:0016491//oxidoreductase activity;GO:0016614//oxidoreductase activity, acting on CH-OH group of donors	-	11	250	adh_short_C2	Domain	122.1	2.9e-35	--	--	--	--	--	--	--	--	--	--	--	--	--
Unigene0000482	1003	80	1.1794	gi|659125278|ref|XP_008462605.1|	499	4e-176	PREDICTED: secoisolariciresinol dehydrogenase-like [Cucumis melo]	sp|Q94KL7|SILD_FORIN	273	1e-88	Secoisolariciresinol dehydrogenase (Fragment) OS=Forsythia intermedia PE=1 SV=1	At3g26770	250	4e-80	KOG0725	Reductases with broad range of substrate specificities	--	--	--	--	--	--	GO:0044699//single-organism process;GO:0008152//metabolic process;GO:0044710//single-organism metabolic process	GO:0016491//oxidoreductase activity;GO:0003824//catalytic activity;GO:0016614//oxidoreductase activity, acting on CH-OH group of donors;GO:0016616//oxidoreductase activity, acting on the CH-OH group of donors, NAD or NADP as acceptor	-	19	258	adh_short_C2	Domain	121.9	3.2e-35	--	--	--	--	--	--	--	--	--	--	--	--	--
Unigene0000483	367	49	1.9742	--	--	--	--	--	--	--	--	--	--	--	--	--	--	--	--	--	--	--	-	-	-	--	--	--	--	--	--	--	--	--	--	--	--	--	--	--	--	--	--	--
Unigene0000484	239	10	0.6187	--	--	--	--	--	--	--	--	--	--	--	--	--	--	--	--	--	--	--	-	-	-	--	--	--	--	--	--	--	--	--	--	--	--	--	--	--	--	--	--	--
Unigene0000485	411	26	0.9354	--	--	--	--	--	--	--	--	--	--	--	--	--	--	--	--	--	--	--	-	-	-	--	--	--	--	--	--	--	--	--	--	--	--	--	--	--	--	--	--	--
Unigene0000486	284	12	0.6248	gi|659118662|ref|XP_008459237.1|	164	3e-45	PREDICTED: serine/threonine-protein kinase SMG1-like [Cucumis melo]	--	--	--	--	--	--	--	--	--	K08873//PI-3-kinase-related kinase SMG-1	1e-45	164	cmo:103498422	ko03015//mRNA surveillance pathway//Translation//Genetic Information Processing	GO:0008152//metabolic process;GO:0009987//cellular process	GO:0016740//transferase activity;GO:0016772//transferase activity, transferring phosphorus-containing groups;GO:0003824//catalytic activity	-	--	--	--	--	--	--	--	--	--	--	--	--	--	--	--	--	--	--	--
Unigene0000487	958	387	5.9733	gi|659099942|ref|XP_008450852.1|	318	1e-104	PREDICTED: GATA transcription factor 21 [Cucumis melo]	sp|Q5HZ36|GAT21_ARATH	117	3e-28	GATA transcription factor 21 OS=Arabidopsis thaliana GN=GATA21 PE=1 SV=2	At5g56860	117	4e-29	KOG1601	GATA-4/5/6 transcription factors	--	--	--	--	--	--	-	GO:0005488//binding	-	176	209	GATA	Domain	59.8	9.8e-17	171	219	ZnF_GATA	2.2e-23	80	GATA	--	--	--	--	--	--	--
Unigene0000488	213	10	0.6942	--	--	--	--	--	--	--	--	--	--	--	--	--	--	--	--	--	--	--	-	-	-	--	--	--	--	--	--	--	--	--	--	--	--	--	--	--	--	--	--	--
Unigene0000489	254	12	0.6986	--	--	--	--	--	--	--	--	--	--	--	--	--	--	--	--	--	--	--	-	-	-	--	--	--	--	--	--	--	--	--	--	--	--	--	--	--	--	--	--	--
Unigene0000490	364	28	1.1374	--	--	--	--	--	--	--	--	--	--	--	--	--	--	--	--	--	--	--	-	-	-	--	--	--	--	--	--	--	--	--	--	--	--	--	--	--	--	--	--	--
Unigene0000491	2410	2509	15.394	gi|778713772|ref|XP_011657120.1|	942	0	PREDICTED: pentatricopeptide repeat-containing protein At2g30100, chloroplastic [Cucumis sativus]	sp|Q0WNN7|PP176_ARATH	585	0	Pentatricopeptide repeat-containing protein At2g30100, chloroplastic OS=Arabidopsis thaliana GN=At2g30100 PE=2 SV=2	At1g10910	51.6	4e-06	KOG4197	FOG: PPR repeat	--	--	--	--	--	--	-	-	GO:0043226//organelle;GO:0005623//cell;GO:0044424//intracellular part;GO:0044444//cytoplasmic part;GO:0005737//cytoplasm;GO:0044464//cell part;GO:0005622//intracellular;GO:0043227//membrane-bounded organelle;GO:0009536//plastid;GO:0043231//intracellular membrane-bounded organelle;GO:0043229//intracellular organelle	--	--	--	--	--	--	--	--	--	--	--	--	--	--	--	--	--	--	--
Unigene0000492	1375	2707	29.1107	gi|778662668|ref|XP_011659936.1|	494	9e-172	PREDICTED: transcription factor UNE12-like isoform X2 [Cucumis sativus]	sp|O22768|UNE12_ARATH	255	3e-79	Transcription factor UNE12 OS=Arabidopsis thaliana GN=UNE12 PE=2 SV=2	--	--	--	--	--	--	--	--	--	--	--	-	GO:0005488//binding;GO:0005515//protein binding	-	174	218	HLH	Domain	31.5	9.5e-08	175	224	HLH	3.2e-14	50.5	bHLH	--	--	--	--	--	--	--
Unigene0000493	240	11	0.6777	--	--	--	--	--	--	--	--	--	--	--	--	--	--	--	--	--	--	--	-	-	-	--	--	--	--	--	--	--	--	--	--	--	--	--	--	--	--	--	--	--
Unigene0000494	222	12	0.7993	--	--	--	--	--	--	--	--	--	--	--	--	--	--	--	--	--	--	--	-	-	-	--	--	--	--	--	--	--	--	--	--	--	--	--	--	--	--	--	--	--
Unigene0000495	280	30	1.5843	--	--	--	--	--	--	--	--	--	--	--	--	--	--	--	--	--	--	--	-	-	-	--	--	--	--	--	--	--	--	--	--	--	--	--	--	--	--	--	--	--
Unigene0000496	317	21	0.9796	--	--	--	--	--	--	--	--	--	--	--	--	--	--	--	--	--	--	--	-	-	-	--	--	--	--	--	--	--	--	--	--	--	--	--	--	--	--	--	--	--
Unigene0000497	425	7	0.2435	gi|659122849|ref|XP_008461357.1|	134	3e-37	PREDICTED: lactoylglutathione lyase [Cucumis melo]	--	--	--	--	--	--	--	--	--	--	--	--	--	--	--	GO:0009987//cellular process;GO:0006629//lipid metabolic process;GO:0051235//maintenance of location;GO:0032501//multicellular organismal process;GO:0044238//primary metabolic process;GO:0044763//single-organism cellular process;GO:0051179//localization;GO:0065007//biological regulation;GO:0009266//response to temperature stimulus;GO:0044707//single-multicellular organism process;GO:0006950//resp…	GO:0003824//catalytic activity	-	--	--	--	--	--	--	--	--	--	--	--	--	--	--	--	--	--	--	--
Unigene0000498	907	211	3.4399	gi|659122849|ref|XP_008461357.1|	303	1e-100	PREDICTED: lactoylglutathione lyase [Cucumis melo]	sp|Q9CPU0|LGUL_MOUSE	49.3	7e-06	Lactoylglutathione lyase OS=Mus musculus GN=Glo1 PE=1 SV=3	Hs5729842	49.3	1e-06	KOG2944	Glyoxalase	--	--	--	--	--	--	GO:0051235//maintenance of location;GO:0009266//response to temperature stimulus;GO:0006950//response to stress;GO:0050896//response to stimulus;GO:0006720//isoprenoid metabolic process;GO:0009409//response to cold;GO:0006629//lipid metabolic process;GO:0065007//biological regulation;GO:0044238//primary metabolic process;GO:0032501//multicellular organismal process;GO:0044255//cellular lipid meta…	GO:0003824//catalytic activity	-	54	171	Glyoxalase_2	Domain	51.8	9.1e-14	--	--	--	--	--	--	--	--	--	--	--	--	--
Unigene0000499	234	10	0.6319	--	--	--	--	--	--	--	--	--	--	--	--	--	--	--	--	--	--	--	-	-	-	--	--	--	--	--	--	--	--	--	--	--	--	--	--	--	--	--	--	--
Unigene0000500	358	20	0.8261	--	--	--	--	--	--	--	--	--	--	--	--	--	--	--	--	--	--	--	-	-	-	--	--	--	--	--	--	--	--	--	--	--	--	--	--	--	--	--	--	--
Unigene0000501	266	17	0.945	--	--	--	--	--	--	--	--	--	--	--	--	--	--	--	--	--	--	--	-	-	-	--	--	--	--	--	--	--	--	--	--	--	--	--	--	--	--	--	--	--
Unigene0000502	225	15	0.9858	--	--	--	--	--	--	--	--	--	--	--	--	--	--	--	--	--	--	--	-	-	-	--	--	--	--	--	--	--	--	--	--	--	--	--	--	--	--	--	--	--
Unigene0000503	376	24	0.9438	--	--	--	--	--	--	--	--	--	--	--	--	--	--	--	--	--	--	--	-	-	-	--	--	--	--	--	--	--	--	--	--	--	--	--	--	--	--	--	--	--
Unigene0000504	405	31	1.1318	--	--	--	--	--	--	--	--	--	--	--	--	--	--	--	--	--	--	--	-	-	-	--	--	--	--	--	--	--	--	--	--	--	--	--	--	--	--	--	--	--
Unigene0000505	214	11	0.7601	--	--	--	--	--	--	--	--	--	--	--	--	--	--	--	--	--	--	--	-	-	-	--	--	--	--	--	--	--	--	--	--	--	--	--	--	--	--	--	--	--
Unigene0000506	258	20	1.1462	--	--	--	--	--	--	--	--	--	--	--	--	--	--	--	--	--	--	--	-	-	-	--	--	--	--	--	--	--	--	--	--	--	--	--	--	--	--	--	--	--
Unigene0000507	293	12	0.6056	--	--	--	--	--	--	--	--	--	--	--	--	--	--	--	--	--	--	--	-	-	-	--	--	--	--	--	--	--	--	--	--	--	--	--	--	--	--	--	--	--
Unigene0000508	211	2	0.1402	--	--	--	--	--	--	--	--	--	--	--	--	--	--	--	--	--	--	--	-	-	-	--	--	--	--	--	--	--	--	--	--	--	--	--	--	--	--	--	--	--
Unigene0000509	221	21	1.4051	gi|778719872|ref|XP_004134832.2|	140	1e-39	PREDICTED: chitinase 1-like [Cucumis sativus]	sp|Q42993|CHI1_ORYSJ	128	6e-36	Chitinase 1 OS=Oryza sativa subsp. japonica GN=Cht1 PE=2 SV=1	At3g12500	119	4e-33	KOG4742	Predicted chitinase	K01183//chitinase [EC:3.2.1.14]	5e-40	140	csv:101215333	ko00520//Amino sugar and nucleotide sugar metabolism//Carbohydrate metabolism//Metabolism	GO:0071704//organic substance metabolic process;GO:0006022//aminoglycan metabolic process;GO:0071554//cell wall organization or biogenesis;GO:1901564//organonitrogen compound metabolic process;GO:0044260//cellular macromolecule metabolic process;GO:1901136//carbohydrate derivative catabolic process;GO:0009987//cellular process;GO:0006026//aminoglycan catabolic process;GO:0006807//nitrogen compoun…	GO:0016787//hydrolase activity;GO:0016798//hydrolase activity, acting on glycosyl bonds;GO:0005488//binding;GO:0097367//carbohydrate derivative binding;GO:0003824//catalytic activity;GO:0004553//hydrolase activity, hydrolyzing O-glycosyl compounds	-	2	73	Glyco_hydro_19	Domain	116	1.9e-33	--	--	--	--	--	--	--	--	--	--	--	--	--
Unigene0000510	680	48	1.0438	--	--	--	--	--	--	--	--	--	--	--	--	--	--	--	--	--	--	--	-	-	-	--	--	--	--	--	--	--	--	--	--	--	--	--	--	--	--	--	--	--
Unigene0000511	311	0	0	--	--	--	--	--	--	--	--	--	--	--	--	--	--	--	--	--	--	--	-	-	-	--	--	--	--	--	--	--	--	--	--	--	--	--	--	--	--	--	--	--
Unigene0000512	225	11	0.7229	--	--	--	--	--	--	--	--	--	--	--	--	--	--	--	--	--	--	--	-	-	-	--	--	--	--	--	--	--	--	--	--	--	--	--	--	--	--	--	--	--
Unigene0000513	267	0	0	gi|685323672|ref|XP_009151506.1|	117	2e-29	PREDICTED: serine/threonine-protein kinase TIO-like, partial [Brassica rapa]	sp|Q99315|YG31B_YEAST	47	1e-05	Transposon Ty3-G Gag-Pol polyprotein OS=Saccharomyces cerevisiae (strain ATCC 204508 / S288c) GN=TY3B-G PE=1 SV=3	At1g35647	85.5	1e-19	KOG0017	FOG: Transposon-encoded proteins with TYA, reverse transcriptase, integrase domains in various combinations	--	--	--	--	--	--	GO:0044238//primary metabolic process;GO:0090304//nucleic acid metabolic process;GO:0009987//cellular process;GO:0071704//organic substance metabolic process;GO:0046483//heterocycle metabolic process;GO:0044260//cellular macromolecule metabolic process;GO:0006725//cellular aromatic compound metabolic process;GO:0006139//nucleobase-containing compound metabolic process;GO:0044237//cellular metabol…	GO:0005488//binding;GO:0046914//transition metal ion binding;GO:0043167//ion binding;GO:0043169//cation binding;GO:0097159//organic cyclic compound binding;GO:0046872//metal ion binding	-	--	--	--	--	--	--	--	--	--	--	--	--	--	--	--	--	--	--	--
Unigene0000514	327	5	0.2261	gi|685323672|ref|XP_009151506.1|	134	9e-35	PREDICTED: serine/threonine-protein kinase TIO-like, partial [Brassica rapa]	--	--	--	--	At1g35647	88.6	2e-20	KOG0017	FOG: Transposon-encoded proteins with TYA, reverse transcriptase, integrase domains in various combinations	--	--	--	--	--	--	-	GO:0046872//metal ion binding;GO:0005488//binding;GO:0043169//cation binding;GO:0043167//ion binding	-	--	--	--	--	--	--	--	--	--	--	--	--	--	--	--	--	--	--	--
Unigene0000515	1081	116	1.5867	gi|590571139|ref|XP_007011510.1|	462	3e-158	Ras guanine nucleotide exchange factor K [Theobroma cacao]	--	--	--	--	--	--	--	--	--	--	--	--	--	--	--	-	-	GO:0044424//intracellular part;GO:0043229//intracellular organelle;GO:0044464//cell part;GO:0005622//intracellular;GO:0005623//cell;GO:0043231//intracellular membrane-bounded organelle;GO:0043227//membrane-bounded organelle;GO:0043226//organelle	1	360	DUF3537	Family	368.3	3.6e-110	--	--	--	--	--	--	--	--	--	--	--	--	--
Unigene0000516	419	28	0.9881	--	--	--	--	--	--	--	--	--	--	--	--	--	--	--	--	--	--	--	-	-	-	--	--	--	--	--	--	--	--	--	--	--	--	--	--	--	--	--	--	--
Unigene0000517	1180	7292	91.376	gi|317106712|dbj|BAJ53211.1|	99	2e-20	JHL23C09.7 [Jatropha curcas]	--	--	--	--	--	--	--	--	--	--	--	--	--	--	--	-	-	-	57	163	MP	Family	34.7	9.5e-09	--	--	--	--	--	--	--	--	--	--	--	--	--
Unigene0000518	219	16	1.0803	gi|823254185|ref|XP_012459736.1|	64.3	3e-11	PREDICTED: omega-hydroxypalmitate O-feruloyl transferase-like [Gossypium raimondii]	sp|Q94CD1|HHT1_ARATH	47.4	3e-06	Omega-hydroxypalmitate O-feruloyl transferase OS=Arabidopsis thaliana GN=HHT1 PE=1 SV=1	--	--	--	--	--	K15400//omega-hydroxypalmitate O-feruloyl transferase [EC:2.3.1.188]	2e-09	58.2	pda:103717466	ko00073//Cutin, suberine and wax biosynthesis//Lipid metabolism//Metabolism	-	GO:0016746//transferase activity, transferring acyl groups;GO:0003824//catalytic activity;GO:0016740//transferase activity	-	--	--	--	--	--	--	--	--	--	--	--	--	--	--	--	--	--	--	--
Unigene0000519	235	15	0.9438	gi|568832488|ref|XP_006470464.1|	90.5	4e-20	PREDICTED: LRR receptor-like serine/threonine-protein kinase GSO1-like [Citrus sinensis]	--	--	--	--	At4g13900	51.6	3e-08	KOG0619	FOG: Leucine rich repeat	--	--	--	--	--	--	-	-	-	--	--	--	--	--	--	--	--	--	--	--	--	--	--	--	--	--	--	--
Unigene0000520	249	29	1.7221	--	--	--	--	--	--	--	--	--	--	--	--	--	--	--	--	--	--	--	-	-	-	--	--	--	--	--	--	--	--	--	--	--	--	--	--	--	--	--	--	--
Unigene0000521	359	40	1.6475	--	--	--	--	--	--	--	--	--	--	--	--	--	--	--	--	--	--	--	-	-	-	--	--	--	--	--	--	--	--	--	--	--	--	--	--	--	--	--	--	--
Unigene0000522	221	15	1.0036	--	--	--	--	--	--	--	--	--	--	--	--	--	--	--	--	--	--	--	-	-	-	--	--	--	--	--	--	--	--	--	--	--	--	--	--	--	--	--	--	--
Unigene0000523	397	21	0.7822	gi|470137106|ref|XP_004304315.1|	48.9	2e-09	PREDICTED: WD repeat-containing protein 55 [Fragaria vesca subsp. vesca]	--	--	--	--	--	--	--	--	--	--	--	--	--	--	--	-	GO:1901363//heterocyclic compound binding;GO:0005488//binding;GO:0097159//organic cyclic compound binding;GO:0036094//small molecule binding	GO:0043226//organelle;GO:0044430//cytoskeletal part;GO:0005622//intracellular;GO:0043232//intracellular non-membrane-bounded organelle;GO:0005623//cell;GO:0005856//cytoskeleton;GO:0032991//macromolecular complex;GO:0043228//non-membrane-bounded organelle;GO:0044424//intracellular part;GO:0044446//intracellular organelle part;GO:0043229//intracellular organelle;GO:0044464//cell part;GO:0043234//pr…	--	--	--	--	--	--	--	--	--	--	--	--	--	--	--	--	--	--	--
Unigene0000524	252	16	0.9388	--	--	--	--	--	--	--	--	--	--	--	--	--	--	--	--	--	--	--	-	-	-	--	--	--	--	--	--	--	--	--	--	--	--	--	--	--	--	--	--	--
Unigene0000525	266	26	1.4453	--	--	--	--	--	--	--	--	--	--	--	--	--	--	--	--	--	--	--	-	-	-	--	--	--	--	--	--	--	--	--	--	--	--	--	--	--	--	--	--	--
Unigene0000526	225	10	0.6572	gi|307135818|gb|ADN33690.1|	58.2	4e-09	SIL1 [Cucumis melo subsp. melo]	--	--	--	--	--	--	--	--	--	--	--	--	--	--	--	-	-	-	--	--	--	--	--	--	--	--	--	--	--	--	--	--	--	--	--	--	--
Unigene0000527	791	51	0.9534	gi|659094341|ref|XP_008448008.1|	135	2e-34	PREDICTED: retrovirus-related Pol polyprotein from transposon TNT 1-94 isoform X3 [Cucumis melo]	--	--	--	--	At1g34070	56.2	1e-08	KOG0017	FOG: Transposon-encoded proteins with TYA, reverse transcriptase, integrase domains in various combinations	--	--	--	--	--	--	-	-	-	1	108	UBN2	Family	72.6	2e-20	--	--	--	--	--	--	--	--	--	--	--	--	--
Unigene0000528	234	15	0.9479	--	--	--	--	--	--	--	--	--	--	--	--	--	--	--	--	--	--	--	-	-	-	--	--	--	--	--	--	--	--	--	--	--	--	--	--	--	--	--	--	--
Unigene0000529	1138	628	8.1599	gi|659069380|ref|XP_008449535.1|	463	2e-161	PREDICTED: aminoacyl tRNA synthase complex-interacting multifunctional protein 1 [Cucumis melo]	sp|O54873|AIMP1_CRIGR	147	6e-39	Aminoacyl tRNA synthase complex-interacting multifunctional protein 1 OS=Cricetulus griseus GN=AIMP1 PE=2 SV=1	At3g59980	275	2e-89	KOG2241	tRNA-binding protein	K15437//aminoacyl tRNA synthase complex-interacting multifunctional protein 1	1e-161	463	cmo:103491385	--	-	GO:0005488//binding;GO:1901363//heterocyclic compound binding;GO:0016876//ligase activity, forming aminoacyl-tRNA and related compounds;GO:0003676//nucleic acid binding;GO:0003723//RNA binding;GO:0016874//ligase activity;GO:0097159//organic cyclic compound binding;GO:0003824//catalytic activity;GO:0004812//aminoacyl-tRNA ligase activity;GO:0016875//ligase activity, forming carbon-oxygen bonds	GO:0043226//organelle;GO:0044464//cell part;GO:0043227//membrane-bounded organelle;GO:0009536//plastid;GO:0043231//intracellular membrane-bounded organelle;GO:0005623//cell;GO:0044424//intracellular part;GO:0005622//intracellular;GO:0005737//cytoplasm;GO:0043229//intracellular organelle;GO:0044444//cytoplasmic part	129	223	tRNA_bind	Domain	94.8	1.8e-27	--	--	--	--	--	--	--	--	--	--	--	--	--
Unigene0000530	860	6	0.1032	gi|659069380|ref|XP_008449535.1|	381	2e-130	PREDICTED: aminoacyl tRNA synthase complex-interacting multifunctional protein 1 [Cucumis melo]	sp|O54873|AIMP1_CRIGR	129	6e-33	Aminoacyl tRNA synthase complex-interacting multifunctional protein 1 OS=Cricetulus griseus GN=AIMP1 PE=2 SV=1	At3g59980	218	2e-68	KOG2241	tRNA-binding protein	K15437//aminoacyl tRNA synthase complex-interacting multifunctional protein 1	7e-131	381	cmo:103491385	--	-	GO:0003723//RNA binding;GO:0004812//aminoacyl-tRNA ligase activity;GO:0016876//ligase activity, forming aminoacyl-tRNA and related compounds;GO:0005488//binding;GO:0016875//ligase activity, forming carbon-oxygen bonds;GO:1901363//heterocyclic compound binding;GO:0003676//nucleic acid binding;GO:0097159//organic cyclic compound binding;GO:0003824//catalytic activity;GO:0016874//ligase activity	-	129	224	tRNA_bind	Domain	95.2	1.4e-27	--	--	--	--	--	--	--	--	--	--	--	--	--
Unigene0000531	639	0	0	gi|590642986|ref|XP_007030676.1|	262	2e-84	S-adenosyl-L-methionine-dependent methyltransferases superfamily protein [Theobroma cacao]	--	--	--	--	--	--	--	--	--	--	--	--	--	--	--	GO:0008152//metabolic process	GO:0016740//transferase activity;GO:0016741//transferase activity, transferring one-carbon groups;GO:0003824//catalytic activity	-	--	--	--	--	--	--	--	--	--	--	--	--	--	--	--	--	--	--	--
Unigene0000532	1386	1093	11.6607	gi|728828254|gb|KHG07697.1|	499	1e-173	Ribosomal RNA small subunit methyltransferase A [Gossypium arboreum]	--	--	--	--	--	--	--	--	--	--	--	--	--	--	--	GO:0008152//metabolic process	GO:0003824//catalytic activity;GO:0016741//transferase activity, transferring one-carbon groups;GO:0016740//transferase activity	-	--	--	--	--	--	--	--	--	--	--	--	--	--	--	--	--	--	--	--
Unigene0000533	961	2188	33.666	gi|645257927|ref|XP_008234641.1|	318	4e-106	PREDICTED: protein YLS9 [Prunus mume]	sp|Q9SJ52|YLS9_ARATH	79	5e-16	Protein YLS9 OS=Arabidopsis thaliana GN=YLS9 PE=2 SV=1	--	--	--	--	--	--	--	--	--	--	--	-	-	-	81	184	LEA_2	Family	44.9	1.1e-11	--	--	--	--	--	--	--	--	--	--	--	--	--
Unigene0000534	281	13	0.6841	--	--	--	--	--	--	--	--	--	--	--	--	--	--	--	--	--	--	--	-	-	-	--	--	--	--	--	--	--	--	--	--	--	--	--	--	--	--	--	--	--
Unigene0000535	334	17	0.7526	gi|60460510|gb|AAX20385.1|	149	1e-42	cytosolic glyceraldehyde-3-phosphate dehydrogenase, partial [Gracilariopsis lemaneiformis]	sp|Q5RAB4|G3P_PONAB	214	2e-68	Glyceraldehyde-3-phosphate dehydrogenase OS=Pongo abelii GN=GAPDH PE=2 SV=3	Hs7669492	214	4e-69	KOG0657	Glyceraldehyde 3-phosphate dehydrogenase	K00134//glyceraldehyde 3-phosphate dehydrogenase [EC:1.2.1.12]	6e-43	150	gsl:Gasu_04650	ko01200//Carbon metabolism//Global and Overview//Metabolism;ko01230//Biosynthesis of amino acids//Global and Overview//Metabolism;ko00010//Glycolysis / Gluconeogenesis//Carbohydrate metabolism//Metabolism;ko00710//Carbon fixation in photosynthetic organisms//Energy metabolism//Metabolism	GO:0071704//organic substance metabolic process;GO:0044699//single-organism process;GO:0044723//single-organism carbohydrate metabolic process;GO:0006082//organic acid metabolic process;GO:0043436//oxoacid metabolic process;GO:0032787//monocarboxylic acid metabolic process;GO:0005975//carbohydrate metabolic process;GO:0044763//single-organism cellular process;GO:0005996//monosaccharide metabolic …	GO:0097159//organic cyclic compound binding;GO:0036094//small molecule binding;GO:0003824//catalytic activity;GO:1901363//heterocyclic compound binding;GO:0016491//oxidoreductase activity;GO:0016903//oxidoreductase activity, acting on the aldehyde or oxo group of donors;GO:0005488//binding;GO:0000166//nucleotide binding;GO:0016620//oxidoreductase activity, acting on the aldehyde or oxo group of d…	GO:0044424//intracellular part;GO:0043231//intracellular membrane-bounded organelle;GO:0043229//intracellular organelle;GO:0005622//intracellular;GO:0043227//membrane-bounded organelle;GO:0043226//organelle;GO:0044464//cell part;GO:0005623//cell	4	103	Gp_dh_N	Domain	130.7	3.6e-38	4	103	Gp_dh_N	6.1e-72	239.7	--	--	--	--	--	--	--	--
Unigene0000536	327	23	1.04	--	--	--	--	--	--	--	--	--	--	--	--	--	--	--	--	--	--	--	-	-	-	--	--	--	--	--	--	--	--	--	--	--	--	--	--	--	--	--	--	--
Unigene0000537	237	12	0.7487	--	--	--	--	--	--	--	--	--	--	--	--	--	--	--	--	--	--	--	-	-	-	--	--	--	--	--	--	--	--	--	--	--	--	--	--	--	--	--	--	--
Unigene0000538	333	29	1.2877	--	--	--	--	--	--	--	--	--	--	--	--	--	--	--	--	--	--	--	-	-	-	--	--	--	--	--	--	--	--	--	--	--	--	--	--	--	--	--	--	--
Unigene0000539	248	12	0.7155	--	--	--	--	--	--	--	--	--	--	--	--	--	--	--	--	--	--	--	-	-	-	--	--	--	--	--	--	--	--	--	--	--	--	--	--	--	--	--	--	--
Unigene0000540	216	9	0.6161	--	--	--	--	--	--	--	--	--	--	--	--	--	--	--	--	--	--	--	-	-	-	--	--	--	--	--	--	--	--	--	--	--	--	--	--	--	--	--	--	--
Unigene0000541	1579	3978	37.2521	gi|659124590|ref|XP_008462243.1|	793	0	PREDICTED: translation initiation factor eIF-2B subunit alpha [Cucumis melo]	sp|Q54I81|EI2BA_DICDI	262	4e-81	Translation initiation factor eIF-2B subunit alpha OS=Dictyostelium discoideum GN=eif2b1 PE=3 SV=1	At1g72340	602	0	KOG1466	Translation initiation factor 2B, alpha subunit (eIF-2Balpha/GCN3)	K03239//translation initiation factor eIF-2B subunit alpha	0	793	cmo:103500646	ko03013//RNA transport//Translation//Genetic Information Processing	GO:0019538//protein metabolic process;GO:0006412//translation;GO:0008152//metabolic process;GO:0044249//cellular biosynthetic process;GO:0034645//cellular macromolecule biosynthetic process;GO:0071704//organic substance metabolic process;GO:1901576//organic substance biosynthetic process;GO:0009058//biosynthetic process;GO:0044267//cellular protein metabolic process;GO:0010467//gene expression;GO…	GO:0005488//binding;GO:1901363//heterocyclic compound binding;GO:0003676//nucleic acid binding;GO:0008135//translation factor activity, RNA binding;GO:0097159//organic cyclic compound binding;GO:0003723//RNA binding	-	108	382	IF-2B	Family	225.7	5e-67	--	--	--	--	--	--	--	--	--	--	--	--	--
Unigene0000542	685	128	2.763	gi|449440024|ref|XP_004137785.1|	407	6e-142	PREDICTED: protein ALUMINUM SENSITIVE 3 [Cucumis sativus]	sp|Q9ZUT3|ALS3_ARATH	329	5e-112	Protein ALUMINUM SENSITIVE 3 OS=Arabidopsis thaliana GN=ALS3 PE=1 SV=1	--	--	--	--	--	K02069//putative ABC transport system permease protein	3e-142	407	csv:101208138	--	GO:0042221//response to chemical;GO:0010038//response to metal ion;GO:0010035//response to inorganic substance;GO:0050896//response to stimulus	-	GO:0031224//intrinsic component of membrane;GO:0044425//membrane part;GO:0016020//membrane	19	213	UPF0014	Family	165	1.5e-48	--	--	--	--	--	--	--	--	--	--	--	--	--
Unigene0000543	709	79	1.6476	--	--	--	--	--	--	--	--	--	--	--	--	--	--	--	--	--	--	--	-	-	-	--	--	--	--	--	--	--	--	--	--	--	--	--	--	--	--	--	--	--
Unigene0000544	859	1299	22.3606	gi|659076669|ref|XP_008438804.1|	303	4e-101	PREDICTED: CASP-like protein VIT_05s0020g01830 [Cucumis melo]	sp|C6SVQ5|CSPL7_SOYBN	208	7e-65	CASP-like protein 1D2 OS=Glycine max PE=2 SV=1	--	--	--	--	--	--	--	--	--	--	--	-	-	GO:0016020//membrane	28	177	DUF588	Domain	128.3	1.4e-37	--	--	--	--	--	--	--	--	--	--	--	--	--
Unigene0000545	604	23	0.5631	gi|659076669|ref|XP_008438804.1|	171	1e-50	PREDICTED: CASP-like protein VIT_05s0020g01830 [Cucumis melo]	sp|B9RT03|CSPL5_RICCO	107	4e-27	CASP-like protein 1D1 OS=Ricinus communis GN=RCOM_0679870 PE=2 SV=1	--	--	--	--	--	--	--	--	--	--	--	-	-	GO:0016020//membrane	28	122	DUF588	Domain	64.5	6.5e-18	--	--	--	--	--	--	--	--	--	--	--	--	--
Unigene0000546	883	77	1.2894	gi|568864653|ref|XP_006485707.1|	87	2e-17	PREDICTED: suppressor protein SRP40-like [Citrus sinensis]	--	--	--	--	--	--	--	--	--	--	--	--	--	--	--	-	-	-	--	--	--	--	--	--	--	--	--	--	--	--	--	--	--	--	--	--	--
Unigene0000547	232	9	0.5736	gi|27901712|gb|AAO26691.1|AF478379_1	50.4	2e-08	gag-pol polyprotein [Vitis vinifera]	--	--	--	--	--	--	--	--	--	--	--	--	--	--	--	-	GO:0005488//binding	-	--	--	--	--	--	--	--	--	--	--	--	--	--	--	--	--	--	--	--
Unigene0000548	737	66	1.3242	gi|659071582|ref|XP_008460744.1|	52.8	5e-06	PREDICTED: putative ribonuclease H protein At1g65750 [Cucumis melo]	--	--	--	--	--	--	--	--	--	--	--	--	--	--	--	-	-	-	--	--	--	--	--	--	--	--	--	--	--	--	--	--	--	--	--	--	--
Unigene0000549	760	33	0.642	--	--	--	--	--	--	--	--	--	--	--	--	--	--	--	--	--	--	--	-	-	-	--	--	--	--	--	--	--	--	--	--	--	--	--	--	--	--	--	--	--
Unigene0000550	555	2	0.0533	--	--	--	--	--	--	--	--	--	--	--	--	--	--	--	--	--	--	--	-	-	-	--	--	--	--	--	--	--	--	--	--	--	--	--	--	--	--	--	--	--
Unigene0000551	377	119	4.6674	--	--	--	--	--	--	--	--	--	--	--	--	--	--	--	--	--	--	--	-	-	-	--	--	--	--	--	--	--	--	--	--	--	--	--	--	--	--	--	--	--
Unigene0000552	222	8	0.5328	--	--	--	--	--	--	--	--	--	--	--	--	--	--	--	--	--	--	--	-	-	-	--	--	--	--	--	--	--	--	--	--	--	--	--	--	--	--	--	--	--
Unigene0000553	298	21	1.042	--	--	--	--	--	--	--	--	--	--	--	--	--	--	--	--	--	--	--	-	-	-	--	--	--	--	--	--	--	--	--	--	--	--	--	--	--	--	--	--	--
Unigene0000554	284	16	0.833	--	--	--	--	--	--	--	--	--	--	--	--	--	--	--	--	--	--	--	-	-	-	--	--	--	--	--	--	--	--	--	--	--	--	--	--	--	--	--	--	--
Unigene0000555	255	19	1.1017	--	--	--	--	--	--	--	--	--	--	--	--	--	--	--	--	--	--	--	-	-	-	--	--	--	--	--	--	--	--	--	--	--	--	--	--	--	--	--	--	--
Unigene0000556	335	34	1.5007	--	--	--	--	--	--	--	--	--	--	--	--	--	--	--	--	--	--	--	-	-	-	--	--	--	--	--	--	--	--	--	--	--	--	--	--	--	--	--	--	--
Unigene0000557	278	15	0.7978	--	--	--	--	--	--	--	--	--	--	--	--	--	--	--	--	--	--	--	-	-	-	--	--	--	--	--	--	--	--	--	--	--	--	--	--	--	--	--	--	--
Unigene0000558	245	12	0.7242	--	--	--	--	--	--	--	--	--	--	--	--	--	--	--	--	--	--	--	-	-	-	--	--	--	--	--	--	--	--	--	--	--	--	--	--	--	--	--	--	--
Unigene0000559	222	11	0.7327	gi|595882371|ref|XP_007212580.1|	85.1	4e-18	hypothetical protein PRUPE_ppa015871mg, partial [Prunus persica]	--	--	--	--	At2g45230	55.1	2e-09	KOG1075	FOG: Reverse transcriptase	--	--	--	--	--	--	-	-	-	--	--	--	--	--	--	--	--	--	--	--	--	--	--	--	--	--	--	--
Unigene0000560	376	0	0	--	--	--	--	--	--	--	--	--	--	--	--	--	--	--	--	--	--	--	-	-	-	--	--	--	--	--	--	--	--	--	--	--	--	--	--	--	--	--	--	--
Unigene0000561	375	0	0	--	--	--	--	--	--	--	--	--	--	--	--	--	--	--	--	--	--	--	-	-	-	--	--	--	--	--	--	--	--	--	--	--	--	--	--	--	--	--	--	--
Unigene0000562	377	0	0	--	--	--	--	--	--	--	--	--	--	--	--	--	--	--	--	--	--	--	-	-	-	--	--	--	--	--	--	--	--	--	--	--	--	--	--	--	--	--	--	--
Unigene0000563	378	0	0	--	--	--	--	--	--	--	--	--	--	--	--	--	--	--	--	--	--	--	-	-	-	--	--	--	--	--	--	--	--	--	--	--	--	--	--	--	--	--	--	--
Unigene0000564	472	54	1.6917	--	--	--	--	--	--	--	--	--	--	--	--	--	--	--	--	--	--	--	-	-	-	--	--	--	--	--	--	--	--	--	--	--	--	--	--	--	--	--	--	--
Unigene0000565	216	11	0.753	gi|379141534|gb|AFC97116.1|	133	2e-39	NBS-LRR resistance protein, partial [Luffa aegyptiaca]	sp|Q8W474|DRL7_ARATH	49.7	6e-07	Probable disease resistance protein At1g58390 OS=Arabidopsis thaliana GN=At1g58390 PE=2 SV=4	At1g58390	49.7	1e-07	KOG4658	Apoptotic ATPase	--	--	--	--	--	--	-	GO:0097367//carbohydrate derivative binding;GO:0005488//binding;GO:0001882//nucleoside binding;GO:0032550//purine ribonucleoside binding;GO:0032549//ribonucleoside binding;GO:0036094//small molecule binding;GO:0097159//organic cyclic compound binding;GO:0001883//purine nucleoside binding;GO:1901363//heterocyclic compound binding	-	1	71	NB-ARC	Domain	44.4	8.4e-12	--	--	--	--	--	--	PRGDB00151848	Cucsa.277260.1	Putative_R-Genes,_predicted_from_Pythozome	Pennisetum glaucum	NL	9e-30	114
Unigene0000566	377	63	2.471	gi|658021219|ref|XP_008346001.1|	55.1	2e-07	PREDICTED: endoplasmic reticulum oxidoreductin-1-like [Malus domestica]	--	--	--	--	--	--	--	--	--	K10950//ERO1-like protein alpha [EC:1.8.4.-]	8e-08	55.1	mdm:103408965	ko04141//Protein processing in endoplasmic reticulum//Folding, sorting and degradation//Genetic Information Processing	-	-	-	--	--	--	--	--	--	--	--	--	--	--	--	--	--	--	--	--	--	--
Unigene0000567	466	35	1.1106	gi|659079394|ref|XP_008440234.1|	228	8e-73	PREDICTED: salicylic acid-binding protein 2-like [Cucumis melo]	sp|Q6RYA0|SABP2_TOBAC	169	1e-50	Salicylic acid-binding protein 2 OS=Nicotiana tabacum GN=SABP2 PE=1 SV=1	--	--	--	--	--	--	--	--	--	--	--	-	-	-	1	110	Abhydrolase_6	Domain	61.3	1.1e-16	--	--	--	--	--	--	--	--	--	--	--	--	--
Unigene0000568	256	9	0.5198	--	--	--	--	--	--	--	--	--	--	--	--	--	--	--	--	--	--	--	-	-	-	--	--	--	--	--	--	--	--	--	--	--	--	--	--	--	--	--	--	--
Unigene0000569	290	20	1.0198	--	--	--	--	--	--	--	--	--	--	--	--	--	--	--	--	--	--	--	-	-	-	--	--	--	--	--	--	--	--	--	--	--	--	--	--	--	--	--	--	--
Unigene0000570	228	14	0.9079	--	--	--	--	--	--	--	--	--	--	--	--	--	--	--	--	--	--	--	-	-	-	--	--	--	--	--	--	--	--	--	--	--	--	--	--	--	--	--	--	--
Unigene0000571	240	12	0.7393	--	--	--	--	--	--	--	--	--	--	--	--	--	--	--	--	--	--	--	-	-	-	--	--	--	--	--	--	--	--	--	--	--	--	--	--	--	--	--	--	--
Unigene0000572	331	24	1.0721	gi|115434394|ref|NP_001041955.1|	225	5e-74	Os01g0136200 [Oryza sativa Japonica Group]	sp|Q943E6|HS16B_ORYSJ	225	7e-75	16.9 kDa class I heat shock protein 2 OS=Oryza sativa subsp. japonica GN=HSP16.9B PE=2 SV=1	At1g53540	161	1e-50	KOG0710	Molecular chaperone (small heat-shock protein Hsp26/Hsp42)	K13993//HSP20 family protein	2e-74	225	pda:103700494	ko04141//Protein processing in endoplasmic reticulum//Folding, sorting and degradation//Genetic Information Processing	GO:0071840//cellular component organization or biogenesis;GO:0022607//cellular component assembly;GO:0050896//response to stimulus;GO:0071822//protein complex subunit organization;GO:0044085//cellular component biogenesis;GO:0043933//macromolecular complex subunit organization;GO:0006461//protein complex assembly;GO:0070271//protein complex biogenesis;GO:0065003//macromolecular complex assembly;G…	-	GO:0044424//intracellular part;GO:0005622//intracellular;GO:0044464//cell part;GO:0005623//cell	40	110	HSP20	Family	73.9	6.7e-21	--	--	--	--	--	--	--	--	--	--	--	--	--
Unigene0000573	259	16	0.9135	--	--	--	--	--	--	--	--	--	--	--	--	--	--	--	--	--	--	--	-	-	-	--	--	--	--	--	--	--	--	--	--	--	--	--	--	--	--	--	--	--
Unigene0000574	1015	0	0	gi|728821760|gb|KHG04484.1|	159	4e-45	Sushi, von Willebrand factor type A, EGF and pentraxin domain-containing 1 [Gossypium arboreum]	--	--	--	--	--	--	--	--	--	--	--	--	--	--	--	-	-	-	12	102	DUF1677	Family	132.9	3.1e-39	--	--	--	--	--	--	--	--	--	--	--	--	--
Unigene0000575	1015	0	0	gi|728821760|gb|KHG04484.1|	159	4e-45	Sushi, von Willebrand factor type A, EGF and pentraxin domain-containing 1 [Gossypium arboreum]	--	--	--	--	--	--	--	--	--	--	--	--	--	--	--	-	-	-	12	102	DUF1677	Family	132.9	3.1e-39	--	--	--	--	--	--	--	--	--	--	--	--	--
Unigene0000576	395	31	1.1605	--	--	--	--	--	--	--	--	--	--	--	--	--	--	--	--	--	--	--	-	-	-	--	--	--	--	--	--	--	--	--	--	--	--	--	--	--	--	--	--	--
Unigene0000577	245	16	0.9657	--	--	--	--	--	--	--	--	--	--	--	--	--	--	--	--	--	--	--	-	-	-	--	--	--	--	--	--	--	--	--	--	--	--	--	--	--	--	--	--	--
Unigene0000578	362	57	2.3283	gi|657393830|gb|AES70915.2|	115	7e-29	transcription factor KAN2 [Medicago truncatula]	sp|Q0J235|ROLL9_ORYSJ	92	4e-21	Probable transcription factor RL9 OS=Oryza sativa subsp. japonica GN=RL9 PE=2 SV=2	--	--	--	--	--	--	--	--	--	--	--	GO:0048856//anatomical structure development;GO:0048731//system development;GO:0032501//multicellular organismal process;GO:0009987//cellular process;GO:0007389//pattern specification process;GO:0044699//single-organism process;GO:0044767//single-organism developmental process;GO:0032502//developmental process;GO:0048513//organ development;GO:0003002//regionalization;GO:0007275//multicellular org…	-	-	--	--	--	--	--	--	--	--	--	--	--	G2-like	--	--	--	--	--	--	--
Unigene0000579	418	34	1.2027	--	--	--	--	--	--	--	--	--	--	--	--	--	--	--	--	--	--	--	-	-	-	--	--	--	--	--	--	--	--	--	--	--	--	--	--	--	--	--	--	--
Unigene0000580	243	29	1.7647	--	--	--	--	--	--	--	--	--	--	--	--	--	--	--	--	--	--	--	-	-	-	--	--	--	--	--	--	--	--	--	--	--	--	--	--	--	--	--	--	--
Unigene0000581	355	48	1.9993	--	--	--	--	--	--	--	--	--	--	--	--	--	--	--	--	--	--	--	-	-	-	--	--	--	--	--	--	--	--	--	--	--	--	--	--	--	--	--	--	--
Unigene0000582	224	0	0	--	--	--	--	--	--	--	--	--	--	--	--	--	--	--	--	--	--	--	-	-	-	--	--	--	--	--	--	--	--	--	--	--	--	--	--	--	--	--	--	--
Unigene0000583	281	4	0.2105	--	--	--	--	--	--	--	--	--	--	--	--	--	--	--	--	--	--	--	-	-	-	--	--	--	--	--	--	--	--	--	--	--	--	--	--	--	--	--	--	--
Unigene0000584	269	10	0.5497	gi|658041487|ref|XP_008356351.1|	57	2e-08	PREDICTED: histone acetyltransferase HAC1-like [Malus domestica]	--	--	--	--	At2g31080	45.1	5e-06	KOG1075	FOG: Reverse transcriptase	--	--	--	--	--	--	-	-	-	--	--	--	--	--	--	--	--	--	--	--	--	--	--	--	--	--	--	--
Unigene0000585	2391	3783	23.3951	gi|449455425|ref|XP_004145453.1|	927	0	PREDICTED: E3 ubiquitin-protein ligase arih1 [Cucumis sativus]	sp|Q8TC41|RN217_HUMAN	87.4	1e-16	Probable E3 ubiquitin-protein ligase RNF217 OS=Homo sapiens GN=RNF217 PE=2 SV=4	At4g19670	642	0	KOG1812	Predicted E3 ubiquitin ligase	--	--	--	--	--	--	-	GO:0005488//binding;GO:0043169//cation binding;GO:0043167//ion binding;GO:0003824//catalytic activity;GO:0046914//transition metal ion binding;GO:0097159//organic cyclic compound binding;GO:0046872//metal ion binding	-	104|282|363	184|341|410	RVT_3|IBR|IBR	Domain|Family|Family	24.3|32.7|27.5	1.7e-05|4.5e-08|1.9e-06	268|367|203	341|410|248	IBR|IBR|RING	5.6e-15|5.6e-15|1.1e-06	53.0|53.0|26.6	--	--	--	--	--	--	--	--
Unigene0000586	281	14	0.7367	--	--	--	--	--	--	--	--	--	--	--	--	--	--	--	--	--	--	--	-	-	-	--	--	--	--	--	--	--	--	--	--	--	--	--	--	--	--	--	--	--
Unigene0000587	748	49	0.9686	--	--	--	--	--	--	--	--	--	--	--	--	--	--	--	--	--	--	--	-	-	-	--	--	--	--	--	--	--	--	--	--	--	--	--	--	--	--	--	--	--
Unigene0000588	381	55	2.1345	--	--	--	--	--	--	--	--	--	--	--	--	--	--	--	--	--	--	--	-	-	-	--	--	--	--	--	--	--	--	--	--	--	--	--	--	--	--	--	--	--
Unigene0000589	243	19	1.1562	gi|659101438|ref|XP_008451605.1|	151	1e-42	PREDICTED: pentatricopeptide repeat-containing protein At5g56310-like [Cucumis melo]	sp|Q56X05|PPR15_ARATH	85.5	3e-19	Pentatricopeptide repeat-containing protein At1g06145 OS=Arabidopsis thaliana GN=EMB1444 PE=2 SV=2	At1g06150_2	85.1	4e-20	KOG4197	FOG: PPR repeat	--	--	--	--	--	--	-	-	-	21	69	PPR_2	Repeat	36.3	3.6e-09	--	--	--	--	--	--	--	--	--	--	--	--	--
Unigene0000590	301	21	1.0316	gi|659101438|ref|XP_008451605.1|	177	6e-52	PREDICTED: pentatricopeptide repeat-containing protein At5g56310-like [Cucumis melo]	sp|Q9LZ19|PP364_ARATH	111	5e-28	Pentatricopeptide repeat-containing protein At5g04780 OS=Arabidopsis thaliana GN=PCMP-H16 PE=2 SV=2	At5g04780_1	111	5e-29	KOG4197	FOG: PPR repeat	--	--	--	--	--	--	-	-	-	18	41	PPR	Family	21.1	0.00017	--	--	--	--	--	--	--	--	--	--	--	--	--
Unigene0000591	303	19	0.9272	--	--	--	--	--	--	--	--	--	--	--	--	--	--	--	--	--	--	--	-	-	-	--	--	--	--	--	--	--	--	--	--	--	--	--	--	--	--	--	--	--
Unigene0000592	801	70	1.2922	--	--	--	--	--	--	--	--	--	--	--	--	--	--	--	--	--	--	--	-	-	-	--	--	--	--	--	--	--	--	--	--	--	--	--	--	--	--	--	--	--
Unigene0000593	225	11	0.7229	--	--	--	--	--	--	--	--	--	--	--	--	--	--	--	--	--	--	--	-	-	-	--	--	--	--	--	--	--	--	--	--	--	--	--	--	--	--	--	--	--
Unigene0000594	571	10	0.259	gi|449453278|ref|XP_004144385.1|	201	2e-62	PREDICTED: ER lumen protein-retaining receptor [Cucumis sativus]	sp|Q9ZTN2|ERD2_PETHY	190	5e-59	ER lumen protein-retaining receptor OS=Petunia hybrida GN=ERD2 PE=2 SV=1	At1g29330	161	1e-48	KOG3106	ER lumen protein retaining receptor	K10949//ER lumen protein retaining receptor	9e-63	201	csv:101213362	--	GO:1902578//single-organism localization;GO:0048519//negative regulation of biological process;GO:0045185//maintenance of protein location;GO:0070727//cellular macromolecule localization;GO:0051235//maintenance of location;GO:0044699//single-organism process;GO:0034613//cellular protein localization;GO:0051224//negative regulation of protein transport;GO:0032879//regulation of localization;GO:005…	GO:0033218//amide binding;GO:0042277//peptide binding;GO:0005488//binding;GO:0005048//signal sequence binding	GO:0043229//intracellular organelle;GO:0044424//intracellular part;GO:0044464//cell part;GO:0043231//intracellular membrane-bounded organelle;GO:0005622//intracellular;GO:0031224//intrinsic component of membrane;GO:0044425//membrane part;GO:0005623//cell;GO:0016020//membrane;GO:0043227//membrane-bounded organelle;GO:0043226//organelle	2	55	ER_lumen_recept	Family	82.4	4e-23	--	--	--	--	--	--	--	--	--	--	--	--	--
Unigene0000595	1048	4004	56.4937	gi|449453278|ref|XP_004144385.1|	437	2e-152	PREDICTED: ER lumen protein-retaining receptor [Cucumis sativus]	sp|Q8VWI1|ERD2B_ARATH	384	1e-132	ER lumen protein-retaining receptor B OS=Arabidopsis thaliana GN=ERD2B PE=1 SV=1	At1g29330	337	8e-115	KOG3106	ER lumen protein retaining receptor	K10949//ER lumen protein retaining receptor	8e-153	437	csv:101213362	--	GO:0044699//single-organism process;GO:0050789//regulation of biological process;GO:1901615//organic hydroxy compound metabolic process;GO:0006694//steroid biosynthetic process;GO:0006793//phosphorus metabolic process;GO:0045185//maintenance of protein location;GO:0002684//positive regulation of immune system process;GO:0051235//maintenance of location;GO:0051220//cytoplasmic sequestering of prot…	GO:0005488//binding;GO:0042277//peptide binding;GO:0033218//amide binding;GO:0005048//signal sequence binding	GO:0043226//organelle;GO:0044424//intracellular part;GO:0005622//intracellular;GO:0044464//cell part;GO:0043227//membrane-bounded organelle;GO:0016020//membrane;GO:0043229//intracellular organelle;GO:0005623//cell;GO:0044425//membrane part;GO:0043231//intracellular membrane-bounded organelle;GO:0031224//intrinsic component of membrane	28	172	ER_lumen_recept	Family	184.8	1.1e-54	--	--	--	--	--	--	--	--	--	--	--	--	--
Unigene0000596	221	8	0.5353	gi|299474489|gb|ADJ18450.1|	77.4	6e-17	gag/pol protein [Bryonia dioica]	--	--	--	--	--	--	--	--	--	--	--	--	--	--	--	GO:0043170//macromolecule metabolic process;GO:0034641//cellular nitrogen compound metabolic process;GO:0071704//organic substance metabolic process;GO:0006725//cellular aromatic compound metabolic process;GO:0046483//heterocycle metabolic process;GO:0090304//nucleic acid metabolic process;GO:0006139//nucleobase-containing compound metabolic process;GO:0006259//DNA metabolic process;GO:0008152//m…	GO:0043169//cation binding;GO:0046872//metal ion binding;GO:0005488//binding;GO:0046914//transition metal ion binding;GO:0097159//organic cyclic compound binding;GO:0043167//ion binding	-	--	--	--	--	--	--	--	--	--	--	--	--	--	--	--	--	--	--	--
Unigene0000597	250	12	0.7098	--	--	--	--	--	--	--	--	--	--	--	--	--	--	--	--	--	--	--	-	-	-	--	--	--	--	--	--	--	--	--	--	--	--	--	--	--	--	--	--	--
Unigene0000598	888	91	1.5153	gi|659081356|ref|XP_008441291.1|	471	1e-160	PREDICTED: protein PLASTID MOVEMENT IMPAIRED 2 isoform X2 [Cucumis melo]	sp|Q9C9N6|PMI2_ARATH	117	5e-28	Protein PLASTID MOVEMENT IMPAIRED 2 OS=Arabidopsis thaliana GN=PMI2 PE=1 SV=1	--	--	--	--	--	--	--	--	--	--	--	-	-	-	6	293	DUF827	Family	70.9	7e-20	--	--	--	--	--	--	PRGDB00201388	Bra004192	Putative_R-Genes,_predicted_from_Pythozome	Brassica rapa	CNL	2e-29	122
Unigene0000599	239	12	0.7424	--	--	--	--	--	--	--	--	--	--	--	--	--	--	--	--	--	--	--	-	-	-	--	--	--	--	--	--	--	--	--	--	--	--	--	--	--	--	--	--	--
Unigene0000600	332	18	0.8017	--	--	--	--	--	--	--	--	--	--	--	--	--	--	--	--	--	--	--	-	-	-	--	--	--	--	--	--	--	--	--	--	--	--	--	--	--	--	--	--	--
Unigene0000601	301	15	0.7369	--	--	--	--	--	--	--	--	--	--	--	--	--	--	--	--	--	--	--	-	-	-	--	--	--	--	--	--	--	--	--	--	--	--	--	--	--	--	--	--	--
Unigene0000602	569	16	0.4158	gi|449451805|ref|XP_004143651.1|	164	1e-47	PREDICTED: chloride conductance regulatory protein ICln isoform X1 [Cucumis sativus]	sp|Q9LVA7|ICLN_ARATH	103	2e-25	Chloride conductance regulatory protein ICln OS=Arabidopsis thaliana GN=At5g62290 PE=2 SV=1	At5g62290	103	4e-26	KOG3238	Chloride ion current inducer protein	K05019//chloride channel, nucleotide-sensitive, 1A	4e-48	164	csv:101214010	ko03013//RNA transport//Translation//Genetic Information Processing	GO:0000375//RNA splicing, via transesterification reactions;GO:0065008//regulation of biological quality;GO:0071840//cellular component organization or biogenesis;GO:0034641//cellular nitrogen compound metabolic process;GO:0051234//establishment of localization;GO:0006139//nucleobase-containing compound metabolic process;GO:0019538//protein metabolic process;GO:0006464//cellular protein modificat…	GO:0015075//ion transmembrane transporter activity;GO:0022857//transmembrane transporter activity;GO:0005215//transporter activity;GO:0022891//substrate-specific transmembrane transporter activity;GO:0022892//substrate-specific transporter activity	GO:1902494//catalytic complex;GO:0005622//intracellular;GO:0016020//membrane;GO:0032991//macromolecular complex;GO:0043226//organelle;GO:0043231//intracellular membrane-bounded organelle;GO:0043229//intracellular organelle;GO:0044424//intracellular part;GO:0005737//cytoplasm;GO:0044444//cytoplasmic part;GO:0043227//membrane-bounded organelle;GO:0034708//methyltransferase complex;GO:0005623//cell;…	--	--	--	--	--	--	--	--	--	--	--	--	--	--	--	--	--	--	--
Unigene0000603	959	1711	26.3815	gi|449451805|ref|XP_004143651.1|	414	2e-143	PREDICTED: chloride conductance regulatory protein ICln isoform X1 [Cucumis sativus]	sp|Q9LVA7|ICLN_ARATH	255	2e-82	Chloride conductance regulatory protein ICln OS=Arabidopsis thaliana GN=At5g62290 PE=2 SV=1	At5g62290	255	4e-83	KOG3238	Chloride ion current inducer protein	K05019//chloride channel, nucleotide-sensitive, 1A	6e-144	414	csv:101214010	ko03013//RNA transport//Translation//Genetic Information Processing	GO:0008104//protein localization;GO:0070646//protein modification by small protein removal;GO:0008380//RNA splicing;GO:0071702//organic substance transport;GO:0046483//heterocycle metabolic process;GO:0009416//response to light stimulus;GO:0006807//nitrogen compound metabolic process;GO:0044763//single-organism cellular process;GO:0000375//RNA splicing, via transesterification reactions;GO:009030…	GO:0005215//transporter activity;GO:0015075//ion transmembrane transporter activity;GO:0022892//substrate-specific transporter activity;GO:0022857//transmembrane transporter activity;GO:0022891//substrate-specific transmembrane transporter activity	GO:0043234//protein complex;GO:0044464//cell part;GO:0016020//membrane;GO:0005622//intracellular;GO:1990234//transferase complex;GO:0005737//cytoplasm;GO:0044424//intracellular part;GO:0043229//intracellular organelle;GO:0005623//cell;GO:1902494//catalytic complex;GO:0034708//methyltransferase complex;GO:0032991//macromolecular complex;GO:0043227//membrane-bounded organelle;GO:0043226//organelle;…	49	158	ICln_channel	Family	87.2	6.2e-25	--	--	--	--	--	--	--	--	--	--	--	--	--
Unigene0000604	261	12	0.6798	gi|659100508|ref|XP_008451127.1|	132	1e-34	PREDICTED: G-type lectin S-receptor-like serine/threonine-protein kinase RLK1 [Cucumis melo]	sp|Q39202|RLK1_ARATH	72.4	2e-14	G-type lectin S-receptor-like serine/threonine-protein kinase RLK1 OS=Arabidopsis thaliana GN=RLK1 PE=2 SV=2	--	--	--	--	--	--	--	--	--	--	--	GO:0044237//cellular metabolic process;GO:0043170//macromolecule metabolic process;GO:0006464//cellular protein modification process;GO:0036211//protein modification process;GO:0044260//cellular macromolecule metabolic process;GO:0044763//single-organism cellular process;GO:0044699//single-organism process;GO:0006793//phosphorus metabolic process;GO:0009987//cellular process;GO:0019538//protein m…	GO:0016773//phosphotransferase activity, alcohol group as acceptor;GO:0097159//organic cyclic compound binding;GO:1901363//heterocyclic compound binding;GO:0016853//isomerase activity;GO:0004672//protein kinase activity;GO:0001883//purine nucleoside binding;GO:0016854//racemase and epimerase activity;GO:0032550//purine ribonucleoside binding;GO:0005488//binding;GO:0097367//carbohydrate derivative…	-	--	--	--	--	--	--	--	--	--	--	--	--	PRGDB00151475	Cucsa.143060.1	Putative_R-Genes,_predicted_from_Pythozome	Pennisetum glaucum	RLK	9e-36	131
Unigene0000605	355	38	1.5828	--	--	--	--	--	--	--	--	--	--	--	--	--	--	--	--	--	--	--	-	-	-	--	--	--	--	--	--	--	--	--	--	--	--	--	--	--	--	--	--	--
Unigene0000606	589	45	1.1297	gi|659127750|ref|XP_008463869.1|	318	6e-99	PREDICTED: dentin sialophosphoprotein isoform X3 [Cucumis melo]	--	--	--	--	--	--	--	--	--	--	--	--	--	--	--	-	-	-	--	--	--	--	--	--	--	--	--	--	--	--	--	--	--	--	--	--	--
Unigene0000607	213	11	0.7636	--	--	--	--	--	--	--	--	--	--	--	--	--	--	--	--	--	--	--	-	-	-	--	--	--	--	--	--	--	--	--	--	--	--	--	--	--	--	--	--	--
Unigene0000608	359	25	1.0297	--	--	--	--	--	--	--	--	--	--	--	--	--	--	--	--	--	--	--	-	-	-	--	--	--	--	--	--	--	--	--	--	--	--	--	--	--	--	--	--	--
Unigene0000609	1332	235	2.6087	gi|659095808|ref|XP_008448778.1|	537	0	PREDICTED: ATP-dependent Clp protease proteolytic subunit-related protein 4, chloroplastic [Cucumis melo]	sp|Q8LB10|CLPR4_ARATH	444	4e-153	ATP-dependent Clp protease proteolytic subunit-related protein 4, chloroplastic OS=Arabidopsis thaliana GN=CLPR4 PE=1 SV=1	At4g17040	291	3e-95	KOG0840	ATP-dependent Clp protease, proteolytic subunit	K01358//ATP-dependent Clp protease, protease subunit [EC:3.4.21.92]	0	537	cmo:103490843	--	GO:0071704//organic substance metabolic process;GO:0010467//gene expression;GO:0043207//response to external biotic stimulus;GO:0008104//protein localization;GO:0051179//localization;GO:0006090//pyruvate metabolic process;GO:0019538//protein metabolic process;GO:0098542//defense response to other organism;GO:0044699//single-organism process;GO:0044281//small molecule metabolic process;GO:0006950/…	GO:0008233//peptidase activity;GO:0003824//catalytic activity;GO:0070011//peptidase activity, acting on L-amino acid peptides;GO:0004175//endopeptidase activity;GO:0016787//hydrolase activity	GO:0044464//cell part;GO:0005737//cytoplasm;GO:0009526//plastid envelope;GO:0044424//intracellular part;GO:0044446//intracellular organelle part;GO:0043231//intracellular membrane-bounded organelle;GO:0005622//intracellular;GO:0044422//organelle part;GO:0009536//plastid;GO:0043227//membrane-bounded organelle;GO:0005623//cell;GO:0043229//intracellular organelle;GO:0031975//envelope;GO:0009532//pla…	100	281	CLP_protease	Domain	168.6	9.9e-50	--	--	--	--	--	--	--	--	--	--	--	--	--
Unigene0000610	1566	85	0.8026	gi|659095808|ref|XP_008448778.1|	537	0	PREDICTED: ATP-dependent Clp protease proteolytic subunit-related protein 4, chloroplastic [Cucumis melo]	sp|Q8LB10|CLPR4_ARATH	444	6e-152	ATP-dependent Clp protease proteolytic subunit-related protein 4, chloroplastic OS=Arabidopsis thaliana GN=CLPR4 PE=1 SV=1	At4g17040	291	3e-94	KOG0840	ATP-dependent Clp protease, proteolytic subunit	K01358//ATP-dependent Clp protease, protease subunit [EC:3.4.21.92]	0	537	cmo:103490843	--	GO:0002376//immune system process;GO:0051707//response to other organism;GO:0045087//innate immune response;GO:0006950//response to stress;GO:0050896//response to stimulus;GO:0043207//response to external biotic stimulus;GO:0009987//cellular process;GO:0044763//single-organism cellular process;GO:0006955//immune response;GO:0043170//macromolecule metabolic process;GO:0044237//cellular metabolic p…	GO:0004175//endopeptidase activity;GO:0016787//hydrolase activity;GO:0070011//peptidase activity, acting on L-amino acid peptides;GO:0008233//peptidase activity;GO:0003824//catalytic activity	GO:0009536//plastid;GO:0009532//plastid stroma;GO:0044424//intracellular part;GO:0043231//intracellular membrane-bounded organelle;GO:0005622//intracellular;GO:0044444//cytoplasmic part;GO:0031975//envelope;GO:0044446//intracellular organelle part;GO:0044464//cell part;GO:0043229//intracellular organelle;GO:0031967//organelle envelope;GO:0005737//cytoplasm;GO:0043226//organelle;GO:0009526//plasti…	100	281	CLP_protease	Domain	168.6	9.9e-50	--	--	--	--	--	--	--	--	--	--	--	--	--
Unigene0000611	364	22	0.8937	--	--	--	--	--	--	--	--	--	--	--	--	--	--	--	--	--	--	--	-	-	-	--	--	--	--	--	--	--	--	--	--	--	--	--	--	--	--	--	--	--
Unigene0000612	577	143	3.6646	gi|821160374|gb|AKH05240.1|	154	3e-45	chlororespiratory reduction 42 [Hypseocharis bilobata]	--	--	--	--	At5g20930	134	2e-35	KOG1151	Tousled-like protein kinase	--	--	--	--	--	--	GO:0071822//protein complex subunit organization;GO:0090304//nucleic acid metabolic process;GO:0044085//cellular component biogenesis;GO:0065003//macromolecular complex assembly;GO:0034622//cellular macromolecular complex assembly;GO:0006461//protein complex assembly;GO:0071840//cellular component organization or biogenesis;GO:0006725//cellular aromatic compound metabolic process;GO:0046483//hete…	-	-	62	125	DUF3148	Family	78.4	2.1e-22	--	--	--	--	--	--	--	--	--	--	--	--	--
Unigene0000613	234	3	0.1896	gi|659122972|ref|XP_008461420.1|	72.8	2e-14	PREDICTED: putative ribonuclease H protein At1g65750 [Cucumis melo]	--	--	--	--	--	--	--	--	--	--	--	--	--	--	--	GO:0009987//cellular process	-	-	5	64	zf-RVT	Domain	54.4	1.1e-14	--	--	--	--	--	--	--	--	--	--	--	--	--
Unigene0000614	887	174	2.9006	gi|778690723|ref|XP_011653158.1|	429	4e-150	PREDICTED: maf-like protein DDB_G0281937 [Cucumis sativus]	sp|Q54TC5|MAFL2_DICDI	130	1e-34	Maf-like protein DDB_G0281937 OS=Dictyostelium discoideum GN=DDB_G0281937 PE=3 SV=1	At5g42770	222	1e-70	KOG1509	Predicted nucleic acid-binding protein ASMTL	K06287//septum formation protein	2e-150	429	csv:101217527	--	-	-	GO:0005622//intracellular;GO:0005623//cell;GO:0044464//cell part;GO:0044424//intracellular part	36	228	Maf	Domain	131.2	2.1e-38	--	--	--	--	--	--	--	--	--	--	--	--	--
Unigene0000615	387	22	0.8406	gi|659101836|ref|XP_008451818.1|	250	6e-76	PREDICTED: kinesin-like calmodulin-binding protein isoform X2 [Cucumis melo]	--	--	--	--	At1g72250	116	6e-30	KOG0239	Kinesin (KAR3 subfamily)	K10406//kinesin family member C2/C3	3e-76	250	cmo:103492988	--	GO:0044699//single-organism process;GO:0007017//microtubule-based process;GO:0009987//cellular process;GO:0044763//single-organism cellular process	GO:0016817//hydrolase activity, acting on acid anhydrides;GO:0017111//nucleoside-triphosphatase activity;GO:0003824//catalytic activity;GO:0032550//purine ribonucleoside binding;GO:0036094//small molecule binding;GO:0097159//organic cyclic compound binding;GO:0003774//motor activity;GO:0016818//hydrolase activity, acting on acid anhydrides, in phosphorus-containing anhydrides;GO:0001882//nucleosi…	GO:0043232//intracellular non-membrane-bounded organelle;GO:0005622//intracellular;GO:0043226//organelle;GO:0005856//cytoskeleton;GO:0015630//microtubule cytoskeleton;GO:0044464//cell part;GO:0043234//protein complex;GO:0043229//intracellular organelle;GO:0044424//intracellular part;GO:0005875//microtubule associated complex;GO:0044446//intracellular organelle part;GO:0044422//organelle part;GO:0…	53	127	Malectin	Domain	48.3	8.4e-13	--	--	--	--	--	--	--	--	--	--	--	--	--
Unigene0000616	354	27	1.1278	--	--	--	--	--	--	--	--	--	--	--	--	--	--	--	--	--	--	--	-	-	-	--	--	--	--	--	--	--	--	--	--	--	--	--	--	--	--	--	--	--
Unigene0000617	388	17	0.6479	--	--	--	--	--	--	--	--	--	--	--	--	--	--	--	--	--	--	--	-	-	-	--	--	--	--	--	--	--	--	--	--	--	--	--	--	--	--	--	--	--
Unigene0000618	1747	7139	60.4244	gi|449462280|ref|XP_004148869.1|	662	0	PREDICTED: BSD domain-containing protein 1 [Cucumis sativus]	sp|Q3SX22|BSDC1_BOVIN	95.9	1e-19	BSD domain-containing protein 1 OS=Bos taurus GN=BSDC1 PE=2 SV=1	At1g03350	370	9e-121	KOG2690	Uncharacterized conserved protein, contains BSD domain	--	--	--	--	--	--	-	-	-	182	240	BSD	Domain	54.4	7e-15	184	236	BSD	2.3e-14	51.2	--	--	--	--	--	--	--	--
Unigene0000619	221	14	0.9367	gi|659067742|ref|XP_008441076.1|	89	9e-20	PREDICTED: uncharacterized protein LOC103485300 [Cucumis melo]	--	--	--	--	--	--	--	--	--	--	--	--	--	--	--	-	-	-	--	--	--	--	--	--	--	--	--	--	--	--	--	--	--	--	--	--	--
Unigene0000620	422	47	1.6468	--	--	--	--	--	--	--	--	--	--	--	--	--	--	--	--	--	--	--	-	-	-	--	--	--	--	--	--	--	--	--	--	--	--	--	--	--	--	--	--	--
Unigene0000621	336	23	1.0122	gi|659104209|ref|XP_008452847.1|	130	6e-34	PREDICTED: transmembrane 9 superfamily member 4-like [Cucumis melo]	sp|Q8RWW1|TMN10_ARATH	101	2e-24	Transmembrane 9 superfamily member 10 OS=Arabidopsis thaliana GN=TMN10 PE=2 SV=1	At2g24170	101	4e-25	KOG1278	Endosomal membrane proteins, EMP70	K17086//transmembrane 9 superfamily member 2/4	3e-34	130	cmo:103493745	--	GO:0044238//primary metabolic process;GO:0043170//macromolecule metabolic process;GO:0019538//protein metabolic process;GO:0008152//metabolic process;GO:0009058//biosynthetic process;GO:0044237//cellular metabolic process;GO:0034645//cellular macromolecule biosynthetic process;GO:0009059//macromolecule biosynthetic process;GO:0071704//organic substance metabolic process;GO:0009987//cellular proce…	-	GO:0031224//intrinsic component of membrane;GO:0044425//membrane part;GO:0016020//membrane	2	87	EMP70	Family	45.5	3.4e-12	--	--	--	--	--	--	--	--	--	--	--	--	--
Unigene0000622	1057	201	2.8118	gi|659083910|ref|XP_008442605.1|	414	1e-142	PREDICTED: E3 ubiquitin-protein ligase SGR9, amyloplastic [Cucumis melo]	sp|Q8GXF8|SHGR9_ARATH	263	2e-84	E3 ubiquitin-protein ligase SGR9, amyloplastic OS=Arabidopsis thaliana GN=SGR9 PE=1 SV=1	At5g02750	258	3e-83	KOG0800	FOG: Predicted E3 ubiquitin ligase	--	--	--	--	--	--	-	GO:0043167//ion binding;GO:0046872//metal ion binding;GO:0046914//transition metal ion binding;GO:0043169//cation binding;GO:0005488//binding	-	210	252	zf-RING_2	Domain	50.3	1.3e-13	211	251	RING	3e-07	28.4	--	--	--	--	--	--	--	--
Unigene0000623	345	0	0	gi|659083910|ref|XP_008442605.1|	91.3	7e-21	PREDICTED: E3 ubiquitin-protein ligase SGR9, amyloplastic [Cucumis melo]	sp|Q8GXF8|SHGR9_ARATH	69.7	5e-14	E3 ubiquitin-protein ligase SGR9, amyloplastic OS=Arabidopsis thaliana GN=SGR9 PE=1 SV=1	At5g02750	69.7	8e-15	KOG0800	FOG: Predicted E3 ubiquitin ligase	--	--	--	--	--	--	-	GO:0005488//binding;GO:0046872//metal ion binding;GO:0043167//ion binding;GO:0046914//transition metal ion binding;GO:0043169//cation binding	-	--	--	--	--	--	--	--	--	--	--	--	--	--	--	--	--	--	--	--
Unigene0000624	239	8	0.4949	gi|674948948|emb|CDX84367.1|	99.4	2e-23	BnaC03g51330D [Brassica napus]	sp|P93295|M310_ARATH	79.7	1e-18	Uncharacterized mitochondrial protein AtMg00310 OS=Arabidopsis thaliana GN=AtMg00310 PE=4 SV=1	At2g15510	97.1	6e-24	KOG1075	FOG: Reverse transcriptase	--	--	--	--	--	--	-	-	-	--	--	--	--	--	--	--	--	--	--	--	--	--	--	--	--	--	--	--
Unigene0000625	329	17	0.764	--	--	--	--	--	--	--	--	--	--	--	--	--	--	--	--	--	--	--	-	-	-	--	--	--	--	--	--	--	--	--	--	--	--	--	--	--	--	--	--	--
Unigene0000626	219	8	0.5401	--	--	--	--	--	--	--	--	--	--	--	--	--	--	--	--	--	--	--	-	-	-	--	--	--	--	--	--	--	--	--	--	--	--	--	--	--	--	--	--	--
Unigene0000627	1553	678	6.4554	gi|659075186|ref|XP_008438010.1|	788	0	PREDICTED: UDP-glycosyltransferase 91A1-like [Cucumis melo]	sp|D4Q9Z5|SGT3_SOYBN	333	2e-106	Soyasaponin III rhamnosyltransferase OS=Glycine max GN=GmSGT3 PE=1 SV=1	At2g22590	315	3e-100	KOG1192	UDP-glucuronosyl and UDP-glucosyl transferase	--	--	--	--	--	--	-	GO:0003824//catalytic activity;GO:0016740//transferase activity;GO:0016757//transferase activity, transferring glycosyl groups	-	287	437	UDPGT	Family	68.1	4.8e-19	--	--	--	--	--	--	--	--	--	--	--	--	--
Unigene0000628	337	19	0.8337	--	--	--	--	--	--	--	--	--	--	--	--	--	--	--	--	--	--	--	-	-	-	--	--	--	--	--	--	--	--	--	--	--	--	--	--	--	--	--	--	--
Unigene0000629	2461	0	0	gi|449464624|ref|XP_004150029.1|	1092	0	PREDICTED: nuclear pore complex protein NUP1 isoform X1 [Cucumis sativus]	sp|Q9CAF4|NUP1_ARATH	117	1e-25	Nuclear pore complex protein NUP1 OS=Arabidopsis thaliana GN=NUP1 PE=1 SV=1	At3g10650	117	2e-26	KOG0845	Nuclear pore complex, Nup98 component (sc Nup145/Nup100/Nup116)	--	--	--	--	--	--	-	-	-	--	--	--	--	--	--	--	--	--	--	--	--	--	--	--	--	--	--	--
Unigene0000630	2455	0	0	gi|449464624|ref|XP_004150029.1|	1092	0	PREDICTED: nuclear pore complex protein NUP1 isoform X1 [Cucumis sativus]	sp|Q9CAF4|NUP1_ARATH	115	5e-25	Nuclear pore complex protein NUP1 OS=Arabidopsis thaliana GN=NUP1 PE=1 SV=1	At3g10650	115	8e-26	KOG0845	Nuclear pore complex, Nup98 component (sc Nup145/Nup100/Nup116)	--	--	--	--	--	--	-	-	-	--	--	--	--	--	--	--	--	--	--	--	--	--	--	--	--	--	--	--
Unigene0000631	360	41	1.684	gi|731338584|ref|XP_010680400.1|	72	1e-17	PREDICTED: transposon Tf2-1 polyprotein isoform X1 [Beta vulgaris subsp. vulgaris]	--	--	--	--	At2g14640_2	62.8	1e-11	KOG0017	FOG: Transposon-encoded proteins with TYA, reverse transcriptase, integrase domains in various combinations	--	--	--	--	--	--	GO:0018130//heterocycle biosynthetic process;GO:1901360//organic cyclic compound metabolic process;GO:0071704//organic substance metabolic process;GO:0008152//metabolic process;GO:0009059//macromolecule biosynthetic process;GO:0090304//nucleic acid metabolic process;GO:0097659//nucleic acid-templated transcription;GO:0006351//transcription, DNA-templated;GO:1901362//organic cyclic compound biosyn…	-	GO:0005623//cell;GO:0005622//intracellular;GO:0044424//intracellular part;GO:0044464//cell part;GO:0043226//organelle;GO:0043227//membrane-bounded organelle;GO:0043229//intracellular organelle;GO:0043231//intracellular membrane-bounded organelle	--	--	--	--	--	--	--	--	--	--	--	--	--	--	--	--	--	--	--
Unigene0000632	252	18	1.0562	gi|307136175|gb|ADN34016.1|	88.6	3e-19	ty3-gypsy retrotransposon protein [Cucumis melo subsp. melo]	--	--	--	--	--	--	--	--	--	--	--	--	--	--	--	GO:0009889//regulation of biosynthetic process;GO:2001141//regulation of RNA biosynthetic process;GO:0010468//regulation of gene expression;GO:0031326//regulation of cellular biosynthetic process;GO:0060255//regulation of macromolecule metabolic process;GO:2000112//regulation of cellular macromolecule biosynthetic process;GO:0080090//regulation of primary metabolic process;GO:0006355//regulation …	-	GO:0043231//intracellular membrane-bounded organelle;GO:0044464//cell part;GO:0005622//intracellular;GO:0043227//membrane-bounded organelle;GO:0044424//intracellular part;GO:0005623//cell;GO:0043226//organelle;GO:0043229//intracellular organelle	--	--	--	--	--	--	--	--	--	--	--	--	--	--	--	--	--	--	--
Unigene0000633	236	10	0.6265	gi|27901696|gb|AAO26684.1|AF478370_1	99	4e-24	gag-pol polyprotein [Vitis vinifera]	sp|P10978|POLX_TOBAC	52	1e-07	Retrovirus-related Pol polyprotein from transposon TNT 1-94 OS=Nicotiana tabacum PE=2 SV=1	At4g28900	94	9e-23	KOG0017	FOG: Transposon-encoded proteins with TYA, reverse transcriptase, integrase domains in various combinations	--	--	--	--	--	--	GO:0051234//establishment of localization;GO:1901360//organic cyclic compound metabolic process;GO:0006807//nitrogen compound metabolic process;GO:0071704//organic substance metabolic process;GO:0046483//heterocycle metabolic process;GO:0090304//nucleic acid metabolic process;GO:0034641//cellular nitrogen compound metabolic process;GO:0006139//nucleobase-containing compound metabolic process;GO:0…	GO:0003824//catalytic activity;GO:0036094//small molecule binding;GO:1901363//heterocyclic compound binding;GO:0016462//pyrophosphatase activity;GO:0005488//binding;GO:0043167//ion binding;GO:0043169//cation binding;GO:0016787//hydrolase activity;GO:0046914//transition metal ion binding;GO:0046872//metal ion binding;GO:0016817//hydrolase activity, acting on acid anhydrides;GO:0016818//hydrolase a…	-	--	--	--	--	--	--	--	--	--	--	--	--	--	--	--	--	--	--	--
Unigene0000634	245	13	0.7846	--	--	--	--	--	--	--	--	--	--	--	--	--	--	--	--	--	--	--	-	-	-	--	--	--	--	--	--	--	--	--	--	--	--	--	--	--	--	--	--	--
Unigene0000635	212	29	2.0227	--	--	--	--	--	--	--	--	--	--	--	--	--	--	--	--	--	--	--	-	-	-	--	--	--	--	--	--	--	--	--	--	--	--	--	--	--	--	--	--	--
Unigene0000636	360	43	1.7662	--	--	--	--	--	--	--	--	--	--	--	--	--	--	--	--	--	--	--	-	-	-	--	--	--	--	--	--	--	--	--	--	--	--	--	--	--	--	--	--	--
Unigene0000637	1322	1269	14.1938	gi|700209033|gb|KGN64129.1|	295	5e-94	hypothetical protein Csa_1G042410 [Cucumis sativus]	--	--	--	--	--	--	--	--	--	--	--	--	--	--	--	-	-	-	--	--	--	--	--	--	--	--	--	--	--	--	--	--	--	--	--	--	--
Unigene0000638	1624	0	0	gi|449458840|ref|XP_004147154.1|	525	0	PREDICTED: kinesin-like protein KIF22 [Cucumis sativus]	sp|P24339|CUT7_SCHPO	72	7e-12	Kinesin-like protein cut7 OS=Schizosaccharomyces pombe (strain 972 / ATCC 24843) GN=cut7 PE=3 SV=3	At4g14330	384	2e-121	KOG0243	Kinesin-like protein	K10398//kinesin family member 11	0	525	csv:101206310	--	GO:0050789//regulation of biological process;GO:0019538//protein metabolic process;GO:0045892//negative regulation of transcription, DNA-templated;GO:0043933//macromolecular complex subunit organization;GO:0048367//shoot system development;GO:0010468//regulation of gene expression;GO:0010558//negative regulation of macromolecule biosynthetic process;GO:0044710//single-organism metabolic process;G…	GO:0003774//motor activity;GO:0005488//binding;GO:0032549//ribonucleoside binding;GO:0005515//protein binding;GO:0003824//catalytic activity;GO:0016462//pyrophosphatase activity;GO:0016818//hydrolase activity, acting on acid anhydrides, in phosphorus-containing anhydrides;GO:0001883//purine nucleoside binding;GO:0036094//small molecule binding;GO:0008092//cytoskeletal protein binding;GO:0032550//…	GO:0032991//macromolecular complex;GO:0005623//cell;GO:0043226//organelle;GO:0043234//protein complex;GO:0043229//intracellular organelle;GO:0043228//non-membrane-bounded organelle;GO:0005856//cytoskeleton;GO:0044422//organelle part;GO:0044430//cytoskeletal part;GO:0005875//microtubule associated complex;GO:0044446//intracellular organelle part;GO:0044464//cell part;GO:0044424//intracellular part…	10	89	Kinesin	Domain	80.3	9.2e-23	2	97	KISc	8.8e-37	123.5	--	--	--	--	--	--	--	--
Unigene0000639	1626	0	0	gi|449458840|ref|XP_004147154.1|	899	0	PREDICTED: kinesin-like protein KIF22 [Cucumis sativus]	sp|P24339|CUT7_SCHPO	72.4	6e-12	Kinesin-like protein cut7 OS=Schizosaccharomyces pombe (strain 972 / ATCC 24843) GN=cut7 PE=3 SV=3	At4g14330	424	3e-136	KOG0243	Kinesin-like protein	K10398//kinesin family member 11	0	899	csv:101206310	--	GO:1903507//negative regulation of nucleic acid-templated transcription;GO:0043933//macromolecular complex subunit organization;GO:0048513//organ development;GO:0060255//regulation of macromolecule metabolic process;GO:0044707//single-multicellular organism process;GO:0044702//single organism reproductive process;GO:0044710//single-organism metabolic process;GO:0048645//organ formation;GO:0043412…	GO:0016787//hydrolase activity;GO:0016462//pyrophosphatase activity;GO:0005488//binding;GO:1901363//heterocyclic compound binding;GO:0001882//nucleoside binding;GO:0016818//hydrolase activity, acting on acid anhydrides, in phosphorus-containing anhydrides;GO:0003774//motor activity;GO:0005515//protein binding;GO:0001883//purine nucleoside binding;GO:0097159//organic cyclic compound binding;GO:001…	GO:0043228//non-membrane-bounded organelle;GO:0043232//intracellular non-membrane-bounded organelle;GO:0005856//cytoskeleton;GO:0043226//organelle;GO:0043229//intracellular organelle;GO:0044422//organelle part;GO:0043234//protein complex;GO:0044464//cell part;GO:0044424//intracellular part;GO:0044446//intracellular organelle part;GO:0032991//macromolecular complex;GO:0005623//cell;GO:0044430//cyt…	10	89	Kinesin	Domain	78.8	2.6e-22	2	97	KISc	2.4e-36	122	--	--	--	--	--	--	--	--
Unigene0000640	207	9	0.6429	--	--	--	--	--	--	--	--	--	--	--	--	--	--	--	--	--	--	--	-	-	-	--	--	--	--	--	--	--	--	--	--	--	--	--	--	--	--	--	--	--
Unigene0000641	350	27	1.1407	--	--	--	--	--	--	--	--	--	--	--	--	--	--	--	--	--	--	--	-	-	-	--	--	--	--	--	--	--	--	--	--	--	--	--	--	--	--	--	--	--
Unigene0000642	351	25	1.0532	--	--	--	--	--	--	--	--	--	--	--	--	--	--	--	--	--	--	--	-	-	-	--	--	--	--	--	--	--	--	--	--	--	--	--	--	--	--	--	--	--
Unigene0000643	226	12	0.7851	gi|147811389|emb|CAN65484.1|	50.8	2e-06	hypothetical protein VITISV_029474 [Vitis vinifera]	--	--	--	--	--	--	--	--	--	--	--	--	--	--	--	-	-	-	--	--	--	--	--	--	--	--	--	--	--	--	--	--	--	--	--	--	--
Unigene0000644	340	20	0.8698	--	--	--	--	--	--	--	--	--	--	--	--	--	--	--	--	--	--	--	-	-	-	--	--	--	--	--	--	--	--	--	--	--	--	--	--	--	--	--	--	--
Unigene0000645	252	23	1.3496	gi|729312134|ref|XP_010530487.1|	72	2e-13	PREDICTED: zinc finger BED domain-containing protein RICESLEEPER 2-like [Tarenaya hassleriana]	sp|B9FJG3|RSLE1_ORYSJ	54.3	3e-08	Zinc finger BED domain-containing protein RICESLEEPER 1 OS=Oryza sativa subsp. japonica GN=Os05g0239150 PE=3 SV=1	At1g80020	60.8	2e-11	KOG1121	Tam3-transposase (Ac family)	--	--	--	--	--	--	-	GO:0005488//binding	-	--	--	--	--	--	--	--	--	--	--	--	--	--	--	--	--	--	--	--
Unigene0000646	213	10	0.6942	gi|315932726|gb|ADU55793.1|	114	4e-31	HSP20.3 [Citrullus lanatus]	sp|P30236|HSP41_SOYBN	104	7e-28	22.0 kDa class IV heat shock protein OS=Glycine max GN=HSP22.0 PE=3 SV=1	At4g10250	102	1e-27	KOG0710	Molecular chaperone (small heat-shock protein Hsp26/Hsp42)	K13993//HSP20 family protein	2e-31	114	cmo:103498616	ko04141//Protein processing in endoplasmic reticulum//Folding, sorting and degradation//Genetic Information Processing	GO:0044260//cellular macromolecule metabolic process;GO:1901700//response to oxygen-containing compound;GO:0050896//response to stimulus;GO:0044238//primary metabolic process;GO:0044267//cellular protein metabolic process;GO:0042221//response to chemical;GO:0044237//cellular metabolic process;GO:0009642//response to light intensity;GO:0009628//response to abiotic stimulus;GO:0009987//cellular pro…	-	GO:0043229//intracellular organelle;GO:0044464//cell part;GO:0005783//endoplasmic reticulum;GO:0043226//organelle;GO:0012505//endomembrane system;GO:0005623//cell;GO:0044424//intracellular part;GO:0005622//intracellular;GO:0005737//cytoplasm;GO:0044432//endoplasmic reticulum part;GO:0044422//organelle part;GO:0043231//intracellular membrane-bounded organelle;GO:0044444//cytoplasmic part;GO:004322…	1	61	HSP20	Family	61.3	5.6e-17	--	--	--	--	--	--	--	--	--	--	--	--	--
Unigene0000647	247	17	1.0177	--	--	--	--	--	--	--	--	--	--	--	--	--	--	--	--	--	--	--	-	-	-	--	--	--	--	--	--	--	--	--	--	--	--	--	--	--	--	--	--	--
Unigene0000648	476	39	1.2115	--	--	--	--	--	--	--	--	--	--	--	--	--	--	--	--	--	--	--	-	-	-	--	--	--	--	--	--	--	--	--	--	--	--	--	--	--	--	--	--	--
Unigene0000649	213	10	0.6942	--	--	--	--	--	--	--	--	--	--	--	--	--	--	--	--	--	--	--	-	-	-	--	--	--	--	--	--	--	--	--	--	--	--	--	--	--	--	--	--	--
Unigene0000650	252	21	1.2322	--	--	--	--	--	--	--	--	--	--	--	--	--	--	--	--	--	--	--	-	-	-	--	--	--	--	--	--	--	--	--	--	--	--	--	--	--	--	--	--	--
Unigene0000651	221	8	0.5353	--	--	--	--	--	--	--	--	--	--	--	--	--	--	--	--	--	--	--	-	-	-	--	--	--	--	--	--	--	--	--	--	--	--	--	--	--	--	--	--	--
Unigene0000652	210	17	1.197	--	--	--	--	--	--	--	--	--	--	--	--	--	--	--	--	--	--	--	-	-	-	--	--	--	--	--	--	--	--	--	--	--	--	--	--	--	--	--	--	--
Unigene0000653	213	11	0.7636	--	--	--	--	--	--	--	--	--	--	--	--	--	--	--	--	--	--	--	-	-	-	--	--	--	--	--	--	--	--	--	--	--	--	--	--	--	--	--	--	--
Unigene0000654	222	10	0.6661	--	--	--	--	--	--	--	--	--	--	--	--	--	--	--	--	--	--	--	-	-	-	--	--	--	--	--	--	--	--	--	--	--	--	--	--	--	--	--	--	--
Unigene0000655	532	10	0.2779	gi|657943125|ref|XP_008355175.1|	54.3	9e-08	PREDICTED: mitochondrial adenine nucleotide transporter ADNT1, partial [Malus domestica]	sp|O04619|ADNT1_ARATH	53.9	1e-07	Mitochondrial adenine nucleotide transporter ADNT1 OS=Arabidopsis thaliana GN=ADNT1 PE=2 SV=1	At4g01100	53.9	2e-08	KOG0752	Mitochondrial solute carrier protein	K14684//solute carrier family 25 (mitochondrial phosphate transporter), member 23/24/25/41	4e-08	54.3	mdm:103418820	--	-	-	-	--	--	--	--	--	--	--	--	--	--	--	--	--	--	--	--	--	--	--
Unigene0000656	1558	5578	52.9393	gi|659075111|ref|XP_008437971.1|	719	0	PREDICTED: mitochondrial adenine nucleotide transporter ADNT1 [Cucumis melo]	sp|O04619|ADNT1_ARATH	625	0	Mitochondrial adenine nucleotide transporter ADNT1 OS=Arabidopsis thaliana GN=ADNT1 PE=2 SV=1	At4g01100	625	0	KOG0752	Mitochondrial solute carrier protein	K14684//solute carrier family 25 (mitochondrial phosphate transporter), member 23/24/25/41	0	719	cmo:103483229	--	GO:0044763//single-organism cellular process;GO:0044699//single-organism process;GO:0051234//establishment of localization;GO:0051179//localization;GO:0009987//cellular process	-	GO:0031224//intrinsic component of membrane;GO:0016020//membrane;GO:0044425//membrane part	39|141|243	124|233|346	Mito_carr|Mito_carr|Mito_carr	Family|Family|Family	86.3|94.0|91.3	7.7e-25|3e-27|2e-26	--	--	--	--	--	--	--	--	--	--	--	--	--
Unigene0000657	219	13	0.8777	--	--	--	--	--	--	--	--	--	--	--	--	--	--	--	--	--	--	--	-	-	-	--	--	--	--	--	--	--	--	--	--	--	--	--	--	--	--	--	--	--
Unigene0000658	402	1118	41.1229	--	--	--	--	--	--	--	--	--	--	--	--	--	--	--	--	--	--	--	-	-	-	--	--	--	--	--	--	--	--	--	--	--	--	--	--	--	--	--	--	--
Unigene0000659	229	10	0.6457	--	--	--	--	--	--	--	--	--	--	--	--	--	--	--	--	--	--	--	-	-	-	--	--	--	--	--	--	--	--	--	--	--	--	--	--	--	--	--	--	--
Unigene0000660	415	31	1.1045	gi|590653858|ref|XP_007033539.1|	76.3	3e-15	RING/U-box superfamily protein isoform 1 [Theobroma cacao]	sp|Q6NQG7|ATL78_ARATH	62	3e-11	RING-H2 finger protein ATL78 OS=Arabidopsis thaliana GN=ATL78 PE=2 SV=1	At1g49230	62	4e-12	KOG0800	FOG: Predicted E3 ubiquitin ligase	K19040//E3 ubiquitin-protein ligase ATL10/75/76/77/78 [EC:2.3.2.27]	1e-14	72.4	pop:POPTR_0016s14320g	--	-	GO:0043167//ion binding;GO:0043169//cation binding;GO:0005488//binding;GO:0046872//metal ion binding	GO:0016020//membrane	--	--	--	--	--	--	--	--	--	--	--	--	--	--	--	--	--	--	--
Unigene0000661	231	9	0.5761	--	--	--	--	--	--	--	--	--	--	--	--	--	--	--	--	--	--	--	-	-	-	--	--	--	--	--	--	--	--	--	--	--	--	--	--	--	--	--	--	--
Unigene0000662	659	16	0.359	gi|659086576|ref|XP_008444007.1|	286	2e-94	PREDICTED: heme oxygenase 1, chloroplastic-like [Cucumis melo]	sp|O48782|HMOX1_ARATH	259	2e-84	Heme oxygenase 1, chloroplastic OS=Arabidopsis thaliana GN=HO1 PE=1 SV=2	At2g26670	259	3e-85	KOG4480	Heme oxygenase	K00510//heme oxygenase [EC:1.14.99.3]	7e-95	286	cmo:103487455	ko00860//Porphyrin and chlorophyll metabolism//Metabolism of cofactors and vitamins//Metabolism	GO:0055114//oxidation-reduction process;GO:0044710//single-organism metabolic process;GO:0044699//single-organism process;GO:0008152//metabolic process	GO:0016491//oxidoreductase activity;GO:0016705//oxidoreductase activity, acting on paired donors, with incorporation or reduction of molecular oxygen;GO:0003824//catalytic activity	GO:0044424//intracellular part;GO:0043231//intracellular membrane-bounded organelle;GO:0044464//cell part;GO:0005623//cell;GO:0043229//intracellular organelle;GO:0044444//cytoplasmic part;GO:0009536//plastid;GO:0005622//intracellular;GO:0043226//organelle;GO:0043227//membrane-bounded organelle;GO:0005737//cytoplasm	7	135	Heme_oxygenase	Domain	36.3	3.7e-09	--	--	--	--	--	--	--	--	--	--	--	--	--
Unigene0000663	1273	1711	19.8742	gi|659086576|ref|XP_008444007.1|	540	0	PREDICTED: heme oxygenase 1, chloroplastic-like [Cucumis melo]	sp|O48782|HMOX1_ARATH	411	5e-141	Heme oxygenase 1, chloroplastic OS=Arabidopsis thaliana GN=HO1 PE=1 SV=2	At2g26670	411	8e-142	KOG4480	Heme oxygenase	K00510//heme oxygenase [EC:1.14.99.3]	0	540	cmo:103487455	ko00860//Porphyrin and chlorophyll metabolism//Metabolism of cofactors and vitamins//Metabolism	GO:0044710//single-organism metabolic process;GO:0008152//metabolic process;GO:0044699//single-organism process;GO:0055114//oxidation-reduction process	GO:0003824//catalytic activity;GO:0016491//oxidoreductase activity;GO:0016705//oxidoreductase activity, acting on paired donors, with incorporation or reduction of molecular oxygen	GO:0044424//intracellular part;GO:0043227//membrane-bounded organelle;GO:0043226//organelle;GO:0044464//cell part;GO:0044444//cytoplasmic part;GO:0043229//intracellular organelle;GO:0005737//cytoplasm;GO:0005623//cell;GO:0005622//intracellular;GO:0043231//intracellular membrane-bounded organelle;GO:0009536//plastid	125	290	Heme_oxygenase	Domain	40.1	2.5e-10	--	--	--	--	--	--	--	--	--	--	--	--	--
Unigene0000664	238	10	0.6213	--	--	--	--	--	--	--	--	--	--	--	--	--	--	--	--	--	--	--	-	-	-	--	--	--	--	--	--	--	--	--	--	--	--	--	--	--	--	--	--	--
Unigene0000665	226	21	1.374	--	--	--	--	--	--	--	--	--	--	--	--	--	--	--	--	--	--	--	-	-	-	--	--	--	--	--	--	--	--	--	--	--	--	--	--	--	--	--	--	--
Unigene0000666	224	11	0.7261	--	--	--	--	--	--	--	--	--	--	--	--	--	--	--	--	--	--	--	-	-	-	--	--	--	--	--	--	--	--	--	--	--	--	--	--	--	--	--	--	--
Unigene0000667	221	11	0.736	--	--	--	--	--	--	--	--	--	--	--	--	--	--	--	--	--	--	--	-	-	-	--	--	--	--	--	--	--	--	--	--	--	--	--	--	--	--	--	--	--
Unigene0000668	467	29	0.9182	gi|124359209|gb|ABN05720.1|	81.6	1e-16	RNA-directed DNA polymerase (Reverse transcriptase) [Medicago truncatula]	--	--	--	--	At2g05980	55.5	6e-09	KOG1075	FOG: Reverse transcriptase	K18577//mannosylglycoprotein endo-beta-mannosidase [EC:3.2.1.152]	8e-23	101	mdm:103414113	--	-	-	-	--	--	--	--	--	--	--	--	--	--	--	--	--	--	--	--	--	--	--
Unigene0000669	207	9	0.6429	--	--	--	--	--	--	--	--	--	--	--	--	--	--	--	--	--	--	--	-	-	-	--	--	--	--	--	--	--	--	--	--	--	--	--	--	--	--	--	--	--
Unigene0000670	307	14	0.6743	--	--	--	--	--	--	--	--	--	--	--	--	--	--	--	--	--	--	--	-	-	-	--	--	--	--	--	--	--	--	--	--	--	--	--	--	--	--	--	--	--
Unigene0000671	238	12	0.7455	--	--	--	--	--	--	--	--	--	--	--	--	--	--	--	--	--	--	--	-	-	-	--	--	--	--	--	--	--	--	--	--	--	--	--	--	--	--	--	--	--
Unigene0000672	298	14	0.6947	--	--	--	--	--	--	--	--	--	--	--	--	--	--	--	--	--	--	--	-	-	-	--	--	--	--	--	--	--	--	--	--	--	--	--	--	--	--	--	--	--
Unigene0000673	223	9	0.5968	gi|307136175|gb|ADN34016.1|	112	1e-27	ty3-gypsy retrotransposon protein [Cucumis melo subsp. melo]	sp|P0CT40|TF29_SCHPO	68.9	2e-13	Transposon Tf2-9 polyprotein OS=Schizosaccharomyces pombe (strain 972 / ATCC 24843) GN=Tf2-9 PE=3 SV=1	At1g35370_2	87.4	1e-20	KOG0017	FOG: Transposon-encoded proteins with TYA, reverse transcriptase, integrase domains in various combinations	--	--	--	--	--	--	GO:0008152//metabolic process;GO:0006259//DNA metabolic process;GO:1901360//organic cyclic compound metabolic process;GO:0009889//regulation of biosynthetic process;GO:0006807//nitrogen compound metabolic process;GO:0044260//cellular macromolecule metabolic process;GO:0031326//regulation of cellular biosynthetic process;GO:0065007//biological regulation;GO:0043170//macromolecule metabolic process…	GO:0005488//binding;GO:0003824//catalytic activity;GO:0001076//RNA polymerase II transcription factor binding transcription factor activity;GO:0000989//transcription factor binding transcription factor activity;GO:0097159//organic cyclic compound binding;GO:0016740//transferase activity;GO:0000988//protein binding transcription factor activity	GO:0043231//intracellular membrane-bounded organelle;GO:0044464//cell part;GO:0043227//membrane-bounded organelle;GO:0005623//cell;GO:0043234//protein complex;GO:0043229//intracellular organelle;GO:0043226//organelle;GO:0005622//intracellular;GO:0044424//intracellular part;GO:0032991//macromolecular complex	--	--	--	--	--	--	--	--	--	--	--	--	--	--	--	--	--	--	--
Unigene0000674	516	8	0.2292	gi|449458980|ref|XP_004147224.1|	186	2e-55	PREDICTED: ethylene-responsive transcription factor 6 [Cucumis sativus]	--	--	--	--	--	--	--	--	--	K09286//EREBP-like factor	8e-56	186	csv:101203172	--	GO:0019222//regulation of metabolic process;GO:0060255//regulation of macromolecule metabolic process;GO:0065007//biological regulation;GO:0010468//regulation of gene expression;GO:0050789//regulation of biological process	GO:0097159//organic cyclic compound binding;GO:0001071//nucleic acid binding transcription factor activity;GO:0005488//binding;GO:1901363//heterocyclic compound binding;GO:0003676//nucleic acid binding	-	--	--	--	--	--	--	--	--	--	--	--	--	--	--	--	--	--	--	--
Unigene0000675	1069	698	9.6548	gi|659095866|ref|XP_008448805.1|	454	4e-157	PREDICTED: ethylene-responsive transcription factor 5 [Cucumis melo]	sp|O80341|EF102_ARATH	203	1e-60	Ethylene-responsive transcription factor 5 OS=Arabidopsis thaliana GN=ERF5 PE=2 SV=1	--	--	--	--	--	K09286//EREBP-like factor	2e-157	454	cmo:103490863	--	GO:0050789//regulation of biological process;GO:0019222//regulation of metabolic process;GO:0060255//regulation of macromolecule metabolic process;GO:0065007//biological regulation;GO:0010468//regulation of gene expression	GO:1901363//heterocyclic compound binding;GO:0005488//binding;GO:0001071//nucleic acid binding transcription factor activity;GO:0003676//nucleic acid binding;GO:0097159//organic cyclic compound binding	-	187	237	AP2	Domain	60.3	1.3e-16	187	251	AP2	1.5e-40	136.3	ERF	--	--	--	--	--	--	--
Unigene0000676	238	9	0.5592	--	--	--	--	--	--	--	--	--	--	--	--	--	--	--	--	--	--	--	-	-	-	--	--	--	--	--	--	--	--	--	--	--	--	--	--	--	--	--	--	--
Unigene0000677	222	8	0.5328	--	--	--	--	--	--	--	--	--	--	--	--	--	--	--	--	--	--	--	-	-	-	--	--	--	--	--	--	--	--	--	--	--	--	--	--	--	--	--	--	--
Unigene0000678	696	185	3.9303	gi|694319428|ref|XP_009347044.1|	140	9e-38	PREDICTED: dentin sialophosphoprotein-like [Pyrus x bretschneideri]	--	--	--	--	At1g13350	58.2	2e-09	KOG0670	U4/U6-associated splicing factor PRP4	--	--	--	--	--	--	-	-	-	--	--	--	--	--	--	--	--	--	--	--	--	--	--	--	--	--	--	--
Unigene0000679	242	7	0.4277	--	--	--	--	--	--	--	--	--	--	--	--	--	--	--	--	--	--	--	-	-	-	--	--	--	--	--	--	--	--	--	--	--	--	--	--	--	--	--	--	--
Unigene0000680	233	7	0.4442	--	--	--	--	--	--	--	--	--	--	--	--	--	--	--	--	--	--	--	-	-	-	--	--	--	--	--	--	--	--	--	--	--	--	--	--	--	--	--	--	--
Unigene0000681	220	7	0.4705	gi|449464712|ref|XP_004150073.1|	158	3e-44	PREDICTED: beta-galactosidase 5 [Cucumis sativus]	sp|Q9SCV9|BGAL3_ARATH	145	1e-40	Beta-galactosidase 3 OS=Arabidopsis thaliana GN=BGAL3 PE=1 SV=1	At4g36360	145	2e-41	KOG0496	Beta-galactosidase	--	--	--	--	--	--	GO:0071554//cell wall organization or biogenesis;GO:0016043//cellular component organization;GO:0006595//polyamine metabolic process;GO:0008152//metabolic process;GO:0009308//amine metabolic process;GO:0051239//regulation of multicellular organismal process;GO:2000026//regulation of multicellular organismal development;GO:0045229//external encapsulating structure organization;GO:0006576//cellular…	GO:0005488//binding;GO:0016798//hydrolase activity, acting on glycosyl bonds;GO:0015925//galactosidase activity;GO:0004553//hydrolase activity, hydrolyzing O-glycosyl compounds;GO:0003824//catalytic activity;GO:0016787//hydrolase activity	GO:0005576//extracellular region	1	71	Glyco_hydro_35	Family	115.5	2.6e-33	--	--	--	--	--	--	--	--	--	--	--	--	--
Unigene0000682	347	15	0.6392	--	--	--	--	--	--	--	--	--	--	--	--	--	--	--	--	--	--	--	-	-	-	--	--	--	--	--	--	--	--	--	--	--	--	--	--	--	--	--	--	--
Unigene0000683	375	25	0.9858	--	--	--	--	--	--	--	--	--	--	--	--	--	--	--	--	--	--	--	-	-	-	--	--	--	--	--	--	--	--	--	--	--	--	--	--	--	--	--	--	--
Unigene0000684	255	10	0.5799	--	--	--	--	--	--	--	--	--	--	--	--	--	--	--	--	--	--	--	-	-	-	--	--	--	--	--	--	--	--	--	--	--	--	--	--	--	--	--	--	--
Unigene0000685	348	57	2.4219	--	--	--	--	--	--	--	--	--	--	--	--	--	--	--	--	--	--	--	-	-	-	--	--	--	--	--	--	--	--	--	--	--	--	--	--	--	--	--	--	--
Unigene0000686	240	9	0.5545	--	--	--	--	--	--	--	--	--	--	--	--	--	--	--	--	--	--	--	-	-	-	--	--	--	--	--	--	--	--	--	--	--	--	--	--	--	--	--	--	--
Unigene0000687	1228	376	4.5275	gi|659098022|ref|XP_008449937.1|	488	1e-169	PREDICTED: probable membrane-associated kinase regulator 1 [Cucumis melo]	sp|Q3E936|MAKR1_ARATH	206	1e-60	Probable membrane-associated kinase regulator 1 OS=Arabidopsis thaliana GN=MAKR1 PE=1 SV=1	--	--	--	--	--	--	--	--	--	--	--	GO:0008152//metabolic process;GO:0010033//response to organic substance;GO:0044699//single-organism process;GO:0050896//response to stimulus;GO:0009725//response to hormone;GO:0050794//regulation of cellular process;GO:0009719//response to endogenous stimulus;GO:0033993//response to lipid;GO:0065007//biological regulation;GO:0014070//response to organic cyclic compound;GO:0050789//regulation of b…	-	GO:0016020//membrane	--	--	--	--	--	--	--	--	--	--	--	--	--	--	--	--	--	--	--
Unigene0000688	981	0	0	gi|659098022|ref|XP_008449937.1|	389	8e-132	PREDICTED: probable membrane-associated kinase regulator 1 [Cucumis melo]	sp|Q3E936|MAKR1_ARATH	147	2e-39	Probable membrane-associated kinase regulator 1 OS=Arabidopsis thaliana GN=MAKR1 PE=1 SV=1	--	--	--	--	--	--	--	--	--	--	--	-	-	-	--	--	--	--	--	--	--	--	--	--	--	--	--	--	--	--	--	--	--
Unigene0000689	1689	446	3.9046	gi|565379048|ref|XP_006355955.1|	376	3e-153	PREDICTED: probable peptide transporter At1g52190-like isoform X3 [Solanum tuberosum]	sp|Q9M817|PTR6_ARATH	315	2e-97	Protein NRT1/ PTR FAMILY 1.2 OS=Arabidopsis thaliana GN=NPF1.2 PE=1 SV=1	At1g52190	315	3e-98	KOG1237	H+/oligopeptide symporter	K14638//solute carrier family 15 (peptide/histidine transporter), member 3/4	3e-153	377	sot:102580650	--	-	-	-	4	269	PTR2	Family	101.8	3e-29	--	--	--	--	--	--	PRGDB00215095	MDP0000319352	Putative_R-Genes,_predicted_from_Pythozome	Malus x domestica	TNL	6e-28	118
Unigene0000690	479	6	0.1852	gi|731317226|ref|XP_010668218.1|	120	6e-30	PREDICTED: protein NRT1/ PTR FAMILY 1.1-like [Beta vulgaris subsp. vulgaris]	sp|Q9M817|PTR6_ARATH	91.7	2e-20	Protein NRT1/ PTR FAMILY 1.2 OS=Arabidopsis thaliana GN=NPF1.2 PE=1 SV=1	At1g52190	91.7	3e-21	KOG1237	H+/oligopeptide symporter	K14638//solute carrier family 15 (peptide/histidine transporter), member 3/4	2e-30	120	bvg:104885211	--	GO:0044765//single-organism transport;GO:0006807//nitrogen compound metabolic process;GO:0044281//small molecule metabolic process;GO:0009653//anatomical structure morphogenesis;GO:0044237//cellular metabolic process;GO:0006820//anion transport;GO:0051234//establishment of localization;GO:0015698//inorganic anion transport;GO:0006811//ion transport;GO:0048856//anatomical structure development;GO:…	GO:0008509//anion transmembrane transporter activity;GO:0022857//transmembrane transporter activity;GO:0022891//substrate-specific transmembrane transporter activity;GO:0005215//transporter activity;GO:0015075//ion transmembrane transporter activity;GO:0015103//inorganic anion transmembrane transporter activity;GO:0022892//substrate-specific transporter activity	-	--	--	--	--	--	--	--	--	--	--	--	--	--	--	--	--	--	--	--
Unigene0000691	1965	85	0.6396	gi|449438907|ref|XP_004137229.1|	524	2e-180	PREDICTED: BES1/BZR1 homolog protein 4 [Cucumis sativus]	sp|Q9ZV88|BEH4_ARATH	402	1e-133	BES1/BZR1 homolog protein 4 OS=Arabidopsis thaliana GN=BEH4 PE=1 SV=1	--	--	--	--	--	--	--	--	--	--	--	GO:0010468//regulation of gene expression;GO:0065007//biological regulation;GO:0019222//regulation of metabolic process;GO:0050789//regulation of biological process;GO:0060255//regulation of macromolecule metabolic process	-	-	2	145	DUF822	Family	207.9	7.9e-62	--	--	--	--	--	BES1	PRGDB00186771	--	Putative_R-Genes,_collected_from_NCBI_Protein	Vitis vinifera	CNL	8e-29	120
Unigene0000692	1817	0	0	gi|449438907|ref|XP_004137229.1|	524	0	PREDICTED: BES1/BZR1 homolog protein 4 [Cucumis sativus]	sp|Q9ZV88|BEH4_ARATH	402	3e-134	BES1/BZR1 homolog protein 4 OS=Arabidopsis thaliana GN=BEH4 PE=1 SV=1	--	--	--	--	--	--	--	--	--	--	--	GO:0060255//regulation of macromolecule metabolic process;GO:0050789//regulation of biological process;GO:0019222//regulation of metabolic process;GO:0065007//biological regulation;GO:0010468//regulation of gene expression	-	-	2	145	DUF822	Family	207.9	7.9e-62	--	--	--	--	--	BES1	PRGDB00186771	--	Putative_R-Genes,_collected_from_NCBI_Protein	Vitis vinifera	CNL	8e-29	120
Unigene0000693	309	20	0.9571	gi|659128806|ref|XP_008464379.1|	86.3	1e-19	PREDICTED: CASP-like protein POPTRDRAFT_823430 [Cucumis melo]	sp|A7PHN8|CSPL4_VITVI	77	6e-17	CASP-like protein 1F1 OS=Vitis vinifera GN=VIT_17s0000g00560 PE=2 SV=2	--	--	--	--	--	--	--	--	--	--	--	-	-	GO:0016020//membrane	20	59	DUF588	Domain	24.2	1.7e-05	--	--	--	--	--	--	--	--	--	--	--	--	--
Unigene0000694	415	24	0.8551	gi|449440951|ref|XP_004138247.1|	120	5e-32	PREDICTED: CASP-like protein 1F2 [Cucumis sativus]	sp|B9RA90|CSPL8_RICCO	110	2e-29	CASP-like protein 1F1 OS=Ricinus communis GN=RCOM_1504680 PE=2 SV=1	--	--	--	--	--	--	--	--	--	--	--	-	-	GO:0016020//membrane;GO:0044425//membrane part;GO:0031224//intrinsic component of membrane	2	89	DUF588	Domain	89.2	1.7e-25	--	--	--	--	--	--	--	--	--	--	--	--	--
Unigene0000695	428	43	1.4856	gi|743790198|ref|XP_011038317.1|	142	6e-38	PREDICTED: transcription factor bHLH13-like [Populus euphratica]	sp|Q9LNJ5|BH013_ARATH	136	1e-36	Transcription factor bHLH13 OS=Arabidopsis thaliana GN=BHLH13 PE=2 SV=1	--	--	--	--	--	--	--	--	--	--	--	GO:0043170//macromolecule metabolic process;GO:0044260//cellular macromolecule metabolic process;GO:0009987//cellular process;GO:0009058//biosynthetic process;GO:1901576//organic substance biosynthetic process;GO:0044249//cellular biosynthetic process;GO:0009059//macromolecule biosynthetic process;GO:0044237//cellular metabolic process;GO:0008152//metabolic process;GO:0010467//gene expression;GO:…	GO:0005488//binding;GO:0005515//protein binding	-	25	72	HLH	Domain	49.7	1.9e-13	28	77	HLH	1.2e-20	71.2	bHLH	--	--	--	--	--	--	--
Unigene0000696	331	13	0.5807	--	--	--	--	--	--	--	--	--	--	--	--	--	--	--	--	--	--	--	-	-	-	--	--	--	--	--	--	--	--	--	--	--	--	--	--	--	--	--	--	--
Unigene0000697	210	9	0.6337	gi|659082400|ref|XP_008441820.1|	100	9e-24	PREDICTED: probable disease resistance protein At4g27220 isoform X1 [Cucumis melo]	--	--	--	--	--	--	--	--	--	--	--	--	--	--	--	-	GO:0097367//carbohydrate derivative binding;GO:0036094//small molecule binding;GO:0032549//ribonucleoside binding;GO:0097159//organic cyclic compound binding;GO:0032550//purine ribonucleoside binding;GO:0001883//purine nucleoside binding;GO:0005488//binding;GO:0001882//nucleoside binding;GO:1901363//heterocyclic compound binding	-	--	--	--	--	--	--	--	--	--	--	--	--	PRGWK00000135	MELO3C008693	Contributed_R-Genes	Cucumis melo	CNL	2e-26	103
Unigene0000698	208	11	0.782	gi|659082400|ref|XP_008441820.1|	90.1	5e-20	PREDICTED: probable disease resistance protein At4g27220 isoform X1 [Cucumis melo]	--	--	--	--	--	--	--	--	--	--	--	--	--	--	--	-	GO:0036094//small molecule binding;GO:0032550//purine ribonucleoside binding;GO:0032549//ribonucleoside binding;GO:0005488//binding;GO:1901363//heterocyclic compound binding;GO:0001883//purine nucleoside binding;GO:0097159//organic cyclic compound binding;GO:0097367//carbohydrate derivative binding;GO:0001882//nucleoside binding	-	--	--	--	--	--	--	--	--	--	--	--	--	--	--	--	--	--	--	--
Unigene0000699	265	16	0.8928	--	--	--	--	--	--	--	--	--	--	--	--	--	--	--	--	--	--	--	-	-	-	--	--	--	--	--	--	--	--	--	--	--	--	--	--	--	--	--	--	--
Unigene0000700	282	20	1.0487	--	--	--	--	--	--	--	--	--	--	--	--	--	--	--	--	--	--	--	-	-	-	--	--	--	--	--	--	--	--	--	--	--	--	--	--	--	--	--	--	--
Unigene0000701	221	8	0.5353	--	--	--	--	--	--	--	--	--	--	--	--	--	--	--	--	--	--	--	-	-	-	--	--	--	--	--	--	--	--	--	--	--	--	--	--	--	--	--	--	--
Unigene0000702	406	27	0.9833	--	--	--	--	--	--	--	--	--	--	--	--	--	--	--	--	--	--	--	-	-	-	--	--	--	--	--	--	--	--	--	--	--	--	--	--	--	--	--	--	--
Unigene0000703	854	38	0.658	gi|659115202|ref|XP_008457438.1|	332	7e-110	PREDICTED: metal tolerance protein B [Cucumis melo]	sp|Q6DBM8|MTPB_ARATH	192	2e-56	Metal tolerance protein B OS=Arabidopsis thaliana GN=MTPB PE=2 SV=1	At2g29410	192	2e-57	KOG1482	Zn2+ transporter	K14689//solute carrier family 30 (zinc transporter), member 2	3e-110	332	cmo:103497126	--	GO:0009987//cellular process;GO:0051234//establishment of localization;GO:0016043//cellular component organization;GO:0044765//single-organism transport;GO:0006810//transport;GO:0044699//single-organism process;GO:0044763//single-organism cellular process;GO:0051179//localization;GO:0006812//cation transport;GO:0071840//cellular component organization or biogenesis;GO:0006811//ion transport;GO:19…	GO:0022892//substrate-specific transporter activity;GO:0022857//transmembrane transporter activity;GO:0015075//ion transmembrane transporter activity;GO:0005215//transporter activity;GO:0022891//substrate-specific transmembrane transporter activity	GO:0044425//membrane part;GO:0005622//intracellular;GO:0043229//intracellular organelle;GO:0043227//membrane-bounded organelle;GO:0005623//cell;GO:0044464//cell part;GO:0044424//intracellular part;GO:0031224//intrinsic component of membrane;GO:0016020//membrane;GO:0043231//intracellular membrane-bounded organelle;GO:0043226//organelle	68	185	Cation_efflux	Family	88.5	3.4e-25	--	--	--	--	--	--	--	--	--	--	--	--	--
Unigene0000704	1630	1375	12.4733	gi|659115202|ref|XP_008457438.1|	610	0	PREDICTED: metal tolerance protein B [Cucumis melo]	sp|Q6DBM8|MTPB_ARATH	362	1e-118	Metal tolerance protein B OS=Arabidopsis thaliana GN=MTPB PE=2 SV=1	At2g29410	362	2e-119	KOG1482	Zn2+ transporter	K14689//solute carrier family 30 (zinc transporter), member 2	0	610	cmo:103497126	--	GO:0016043//cellular component organization;GO:0044765//single-organism transport;GO:0006811//ion transport;GO:0044763//single-organism cellular process;GO:1902578//single-organism localization;GO:0044699//single-organism process;GO:0006812//cation transport;GO:0051234//establishment of localization;GO:0009987//cellular process;GO:0006810//transport;GO:0071840//cellular component organization or …	GO:0005215//transporter activity;GO:0022892//substrate-specific transporter activity;GO:0015075//ion transmembrane transporter activity;GO:0022857//transmembrane transporter activity;GO:0022891//substrate-specific transmembrane transporter activity	GO:0043231//intracellular membrane-bounded organelle;GO:0016020//membrane;GO:0044425//membrane part;GO:0005622//intracellular;GO:0043226//organelle;GO:0043227//membrane-bounded organelle;GO:0044464//cell part;GO:0044424//intracellular part;GO:0031224//intrinsic component of membrane;GO:0005623//cell;GO:0043229//intracellular organelle	68	386	Cation_efflux	Family	203.2	3.9e-60	--	--	--	--	--	--	--	--	--	--	--	--	--
Unigene0000705	503	14	0.4116	gi|449462912|ref|XP_004149179.1|	144	1e-38	PREDICTED: mitochondrial-processing peptidase subunit alpha [Cucumis sativus]	sp|P29677|MPPA_SOLTU	106	7e-26	Mitochondrial-processing peptidase subunit alpha OS=Solanum tuberosum GN=MPP PE=1 SV=1	At1g51980	105	5e-26	KOG2067	Mitochondrial processing peptidase, alpha subunit	K01412//mitochondrial-processing peptidase subunit alpha [EC:3.4.24.64]	5e-39	144	csv:101217854	--	GO:0071704//organic substance metabolic process;GO:0043170//macromolecule metabolic process;GO:0019538//protein metabolic process;GO:0044238//primary metabolic process;GO:0008152//metabolic process	GO:0003824//catalytic activity;GO:0016787//hydrolase activity;GO:0043169//cation binding;GO:0005488//binding;GO:0004175//endopeptidase activity;GO:0070011//peptidase activity, acting on L-amino acid peptides;GO:0043167//ion binding;GO:0008233//peptidase activity	-	--	--	--	--	--	--	--	--	--	--	--	--	--	--	--	--	--	--	--
Unigene0000706	1816	2140	17.4247	gi|659093496|ref|XP_008447564.1|	967	0	PREDICTED: mitochondrial-processing peptidase subunit alpha-like [Cucumis melo]	sp|P29677|MPPA_SOLTU	718	0	Mitochondrial-processing peptidase subunit alpha OS=Solanum tuberosum GN=MPP PE=1 SV=1	At1g51980	663	0	KOG2067	Mitochondrial processing peptidase, alpha subunit	K01412//mitochondrial-processing peptidase subunit alpha [EC:3.4.24.64]	0	967	cmo:103489980	--	GO:0043170//macromolecule metabolic process;GO:0044238//primary metabolic process;GO:0008152//metabolic process;GO:0071704//organic substance metabolic process;GO:0019538//protein metabolic process	GO:0043167//ion binding;GO:0004175//endopeptidase activity;GO:0005488//binding;GO:0003824//catalytic activity;GO:0043169//cation binding;GO:0070011//peptidase activity, acting on L-amino acid peptides;GO:0016787//hydrolase activity;GO:0008233//peptidase activity	-	86|243	231|421	Peptidase_M16|Peptidase_M16_C	Family|Domain	123.4|120.0	5.5e-36|7.9e-35	--	--	--	--	--	--	--	--	--	--	--	--	--
Unigene0000707	1473	19	0.1907	gi|659093496|ref|XP_008447564.1|	826	0	PREDICTED: mitochondrial-processing peptidase subunit alpha-like [Cucumis melo]	sp|P29677|MPPA_SOLTU	613	0	Mitochondrial-processing peptidase subunit alpha OS=Solanum tuberosum GN=MPP PE=1 SV=1	At1g51980	559	0	KOG2067	Mitochondrial processing peptidase, alpha subunit	K01412//mitochondrial-processing peptidase subunit alpha [EC:3.4.24.64]	0	826	cmo:103489980	--	GO:0019538//protein metabolic process;GO:0071704//organic substance metabolic process;GO:0043170//macromolecule metabolic process;GO:0044238//primary metabolic process;GO:0008152//metabolic process	GO:0043169//cation binding;GO:0008233//peptidase activity;GO:0016787//hydrolase activity;GO:0005488//binding;GO:0070011//peptidase activity, acting on L-amino acid peptides;GO:0004175//endopeptidase activity;GO:0003824//catalytic activity;GO:0043167//ion binding	-	86|243	231|421	Peptidase_M16|Peptidase_M16_C	Family|Domain	123.8|120.5	4.1e-36|5.7e-35	--	--	--	--	--	--	--	--	--	--	--	--	--
Unigene0000708	309	20	0.9571	--	--	--	--	--	--	--	--	--	--	--	--	--	--	--	--	--	--	--	-	-	-	--	--	--	--	--	--	--	--	--	--	--	--	--	--	--	--	--	--	--
Unigene0000709	276	26	1.3929	gi|659129898|ref|XP_008464901.1|	149	9e-45	PREDICTED: 17.6 kDa class I heat shock protein 3-like [Cucumis melo]	sp|Q84J50|HS177_ORYSJ	140	9e-42	17.7 kDa class I heat shock protein OS=Oryza sativa subsp. japonica GN=HSP17.7 PE=2 SV=1	At1g53540	136	5e-41	KOG0710	Molecular chaperone (small heat-shock protein Hsp26/Hsp42)	K13993//HSP20 family protein	4e-45	149	cmo:103502661	ko04141//Protein processing in endoplasmic reticulum//Folding, sorting and degradation//Genetic Information Processing	GO:0050896//response to stimulus;GO:1901700//response to oxygen-containing compound;GO:0006950//response to stress;GO:0006979//response to oxidative stress;GO:0010038//response to metal ion;GO:0097305//response to alcohol;GO:0000302//response to reactive oxygen species;GO:0010033//response to organic substance;GO:0010035//response to inorganic substance;GO:0042221//response to chemical	-	GO:0043231//intracellular membrane-bounded organelle;GO:0043229//intracellular organelle;GO:0005623//cell;GO:0043227//membrane-bounded organelle;GO:0044464//cell part;GO:0043226//organelle;GO:0044424//intracellular part;GO:0005622//intracellular	11	90	HSP20	Family	71.3	4.2e-20	--	--	--	--	--	--	--	--	--	--	--	--	--
Unigene0000710	266	28	1.5565	--	--	--	--	--	--	--	--	--	--	--	--	--	--	--	--	--	--	--	-	-	-	--	--	--	--	--	--	--	--	--	--	--	--	--	--	--	--	--	--	--
Unigene0000711	206	11	0.7896	--	--	--	--	--	--	--	--	--	--	--	--	--	--	--	--	--	--	--	-	-	-	--	--	--	--	--	--	--	--	--	--	--	--	--	--	--	--	--	--	--
Unigene0000712	319	30	1.3906	--	--	--	--	--	--	--	--	--	--	--	--	--	--	--	--	--	--	--	-	-	-	--	--	--	--	--	--	--	--	--	--	--	--	--	--	--	--	--	--	--
Unigene0000713	250	14	0.828	--	--	--	--	--	--	--	--	--	--	--	--	--	--	--	--	--	--	--	-	-	-	--	--	--	--	--	--	--	--	--	--	--	--	--	--	--	--	--	--	--
Unigene0000714	233	19	1.2058	--	--	--	--	--	--	--	--	--	--	--	--	--	--	--	--	--	--	--	-	-	-	--	--	--	--	--	--	--	--	--	--	--	--	--	--	--	--	--	--	--
Unigene0000715	256	16	0.9242	--	--	--	--	--	--	--	--	--	--	--	--	--	--	--	--	--	--	--	-	-	-	--	--	--	--	--	--	--	--	--	--	--	--	--	--	--	--	--	--	--
Unigene0000716	445	38	1.2627	--	--	--	--	--	--	--	--	--	--	--	--	--	--	--	--	--	--	--	-	-	-	--	--	--	--	--	--	--	--	--	--	--	--	--	--	--	--	--	--	--
Unigene0000717	371	15	0.5978	--	--	--	--	--	--	--	--	--	--	--	--	--	--	--	--	--	--	--	-	-	-	--	--	--	--	--	--	--	--	--	--	--	--	--	--	--	--	--	--	--
Unigene0000718	384	32	1.2322	--	--	--	--	--	--	--	--	--	--	--	--	--	--	--	--	--	--	--	-	-	-	--	--	--	--	--	--	--	--	--	--	--	--	--	--	--	--	--	--	--
Unigene0000719	216	9	0.6161	gi|778703176|ref|XP_011655330.1|	51.2	1e-06	PREDICTED: uncharacterized protein LOC101214079 isoform X2 [Cucumis sativus]	--	--	--	--	--	--	--	--	--	--	--	--	--	--	--	-	-	-	--	--	--	--	--	--	--	--	--	--	--	--	--	--	--	--	--	--	--
Unigene0000720	220	10	0.6721	--	--	--	--	--	--	--	--	--	--	--	--	--	--	--	--	--	--	--	-	-	-	--	--	--	--	--	--	--	--	--	--	--	--	--	--	--	--	--	--	--
Unigene0000721	209	7	0.4952	--	--	--	--	--	--	--	--	--	--	--	--	--	--	--	--	--	--	--	-	-	-	--	--	--	--	--	--	--	--	--	--	--	--	--	--	--	--	--	--	--
Unigene0000722	230	11	0.7072	--	--	--	--	--	--	--	--	--	--	--	--	--	--	--	--	--	--	--	-	-	-	--	--	--	--	--	--	--	--	--	--	--	--	--	--	--	--	--	--	--
Unigene0000723	403	68	2.495	--	--	--	--	--	--	--	--	--	--	--	--	--	--	--	--	--	--	--	-	-	-	--	--	--	--	--	--	--	--	--	--	--	--	--	--	--	--	--	--	--
Unigene0000724	1081	10	0.1368	gi|30682566|ref|NP_193103.2|	397	3e-134	protein plastid transcriptionally active 5 [Arabidopsis thaliana]	--	--	--	--	--	--	--	--	--	--	--	--	--	--	--	-	GO:0005488//binding;GO:0005515//protein binding	-	155	213	PG_binding_1	Domain	40.2	2.2e-10	--	--	--	--	--	--	--	--	--	--	--	--	--
Unigene0000725	1122	13	0.1713	gi|30682566|ref|NP_193103.2|	249	6e-102	protein plastid transcriptionally active 5 [Arabidopsis thaliana]	--	--	--	--	--	--	--	--	--	--	--	--	--	--	--	-	GO:0005515//protein binding;GO:0005488//binding	-	2	52	PG_binding_1	Domain	31.8	8.9e-08	--	--	--	--	--	--	--	--	--	--	--	--	--
Unigene0000726	995	141	2.0954	--	--	--	--	--	--	--	--	--	--	--	--	--	--	--	--	--	--	--	-	-	-	--	--	--	--	--	--	--	--	--	--	--	--	--	--	--	--	--	--	--
Unigene0000727	253	16	0.9351	--	--	--	--	--	--	--	--	--	--	--	--	--	--	--	--	--	--	--	-	-	-	--	--	--	--	--	--	--	--	--	--	--	--	--	--	--	--	--	--	--
Unigene0000728	238	19	1.1804	gi|659093714|ref|XP_008447678.1|	47.8	2e-10	PREDICTED: uncharacterized protein LOC103490087 [Cucumis melo]	--	--	--	--	--	--	--	--	--	--	--	--	--	--	--	-	GO:0005488//binding	-	--	--	--	--	--	--	--	--	--	--	--	--	--	--	--	--	--	--	--
Unigene0000729	1832	390	3.1478	gi|659085476|ref|XP_008443439.1|	1216	0	PREDICTED: pentatricopeptide repeat-containing protein At5g39980, chloroplastic [Cucumis melo]	sp|Q9FLD8|PP408_ARATH	1053	0	Pentatricopeptide repeat-containing protein At5g39980, chloroplastic OS=Arabidopsis thaliana GN=At5g39980 PE=2 SV=1	At5g39980	1053	0	KOG4197	FOG: PPR repeat	--	--	--	--	--	--	-	-	GO:0044464//cell part;GO:0005623//cell;GO:0043227//membrane-bounded organelle;GO:0044444//cytoplasmic part;GO:0043231//intracellular membrane-bounded organelle;GO:0043229//intracellular organelle;GO:0005737//cytoplasm;GO:0009536//plastid;GO:0044424//intracellular part;GO:0043226//organelle;GO:0005622//intracellular	78|151|183|256|324|396|463|502	123|181|231|293|368|422|491|527	PPR_2|PPR|PPR_2|PPR_2|PPR_2|PPR|PPR|PPR	Repeat|Family|Repeat|Repeat|Repeat|Family|Family|Family	36.7|10.2|42.3|33.5|55.0|12.6|18.6|18.0	2.7e-09|0.53|4.7e-11|2.7e-08|5e-15|0.091|0.0011|0.0018	--	--	--	--	--	--	PRGDB00183352	GSVIVT01015461001	Putative_R-Genes,_predicted_from_Pythozome	Vitis vinifera	N	5e-26	116
Unigene0000730	444	60	1.9982	gi|659085476|ref|XP_008443439.1|	116	2e-28	PREDICTED: pentatricopeptide repeat-containing protein At5g39980, chloroplastic [Cucumis melo]	--	--	--	--	--	--	--	--	--	--	--	--	--	--	--	-	-	-	--	--	--	--	--	--	--	--	--	--	--	--	--	--	--	--	--	--	--
Unigene0000731	307	20	0.9633	--	--	--	--	--	--	--	--	--	--	--	--	--	--	--	--	--	--	--	-	-	-	--	--	--	--	--	--	--	--	--	--	--	--	--	--	--	--	--	--	--
Unigene0000732	572	0	0	gi|674881428|emb|CDY50860.1|	64.7	7e-12	BnaA05g37210D [Brassica napus]	--	--	--	--	--	--	--	--	--	--	--	--	--	--	--	-	-	-	--	--	--	--	--	--	--	--	--	--	--	--	--	--	--	--	--	--	--
Unigene0000733	652	187	4.2409	gi|674881428|emb|CDY50860.1|	64.7	9e-12	BnaA05g37210D [Brassica napus]	--	--	--	--	--	--	--	--	--	--	--	--	--	--	--	-	-	-	--	--	--	--	--	--	--	--	--	--	--	--	--	--	--	--	--	--	--
Unigene0000734	2053	672	4.84	gi|449432706|ref|XP_004134140.1|	1117	0	PREDICTED: heat shock 70 kDa protein 8 [Cucumis sativus]	sp|Q9SKY8|HSP7H_ARATH	888	0	Heat shock 70 kDa protein 8 OS=Arabidopsis thaliana GN=HSP70-8 PE=1 SV=1	At2g32120	888	0	KOG0101	Molecular chaperones HSP70/HSC70, HSP70 superfamily	K09489//heat shock 70kDa protein 4	0	1117	csv:101206971	--	GO:0008152//metabolic process;GO:0044260//cellular macromolecule metabolic process;GO:0044238//primary metabolic process;GO:0043170//macromolecule metabolic process;GO:0044237//cellular metabolic process;GO:0019538//protein metabolic process;GO:0006950//response to stress;GO:0050896//response to stimulus;GO:0009266//response to temperature stimulus;GO:0071704//organic substance metabolic process;…	GO:0005488//binding;GO:0032549//ribonucleoside binding;GO:0001883//purine nucleoside binding;GO:0097367//carbohydrate derivative binding;GO:0097159//organic cyclic compound binding;GO:0032550//purine ribonucleoside binding;GO:0001882//nucleoside binding;GO:0036094//small molecule binding;GO:1901363//heterocyclic compound binding	-	28	525	HSP70	Family	304.6	7.8e-91	--	--	--	--	--	--	PRGDB00167710	Medtr2g047020.1	Putative_R-Genes,_predicted_from_Pythozome	Medicago truncatula	TNL	9e-40	158
Unigene0000735	325	0	0	gi|659092567|ref|XP_008447124.1|	150	2e-44	PREDICTED: LOB domain-containing protein 4-like [Cucumis melo]	sp|Q9SHE9|LBD4_ARATH	121	5e-34	LOB domain-containing protein 4 OS=Arabidopsis thaliana GN=LBD4 PE=2 SV=1	--	--	--	--	--	--	--	--	--	--	--	GO:0050789//regulation of biological process;GO:0009987//cellular process;GO:0044237//cellular metabolic process;GO:0009799//specification of symmetry;GO:0007275//multicellular organismal development;GO:0010087//phloem or xylem histogenesis;GO:0048507//meristem development;GO:0048532//anatomical structure arrangement;GO:0009653//anatomical structure morphogenesis;GO:0051239//regulation of multice…	-	GO:0044464//cell part;GO:0044424//intracellular part;GO:0005622//intracellular;GO:0043231//intracellular membrane-bounded organelle;GO:0043227//membrane-bounded organelle;GO:0043226//organelle;GO:0043229//intracellular organelle;GO:0005623//cell	15	77	DUF260	Family	95.6	1.6e-27	--	--	--	--	--	LBD	--	--	--	--	--	--	--
Unigene0000736	443	12	0.4005	gi|659092567|ref|XP_008447124.1|	200	2e-63	PREDICTED: LOB domain-containing protein 4-like [Cucumis melo]	sp|Q8LBW3|LBD12_ARATH	171	1e-52	LOB domain-containing protein 12 OS=Arabidopsis thaliana GN=LBD12 PE=2 SV=2	--	--	--	--	--	--	--	--	--	--	--	GO:0007275//multicellular organismal development;GO:0009799//specification of symmetry;GO:0044707//single-multicellular organism process;GO:0044260//cellular macromolecule metabolic process;GO:0044237//cellular metabolic process;GO:0032501//multicellular organismal process;GO:0051239//regulation of multicellular organismal process;GO:0009933//meristem structural organization;GO:0050793//regulatio…	-	GO:0005623//cell;GO:0005622//intracellular;GO:0044464//cell part;GO:0044424//intracellular part;GO:0043231//intracellular membrane-bounded organelle;GO:0043229//intracellular organelle;GO:0043227//membrane-bounded organelle;GO:0043226//organelle	15	115	DUF260	Family	147.9	8.1e-44	--	--	--	--	--	LBD	PRGWK00002314	Sotub11g029390.1.1	Contributed_R-Genes	Solanum tuberosum	CNL	8e-42	142
Unigene0000737	307	26	1.2523	--	--	--	--	--	--	--	--	--	--	--	--	--	--	--	--	--	--	--	-	-	-	--	--	--	--	--	--	--	--	--	--	--	--	--	--	--	--	--	--	--
Unigene0000738	516	65	1.8626	--	--	--	--	--	--	--	--	--	--	--	--	--	--	--	--	--	--	--	-	-	-	--	--	--	--	--	--	--	--	--	--	--	--	--	--	--	--	--	--	--
Unigene0000739	312	17	0.8057	--	--	--	--	--	--	--	--	--	--	--	--	--	--	--	--	--	--	--	-	-	-	--	--	--	--	--	--	--	--	--	--	--	--	--	--	--	--	--	--	--
Unigene0000740	1585	100	0.9329	gi|659098610|ref|XP_008450226.1|	844	0	PREDICTED: probable rhamnogalacturonate lyase B [Cucumis melo]	sp|Q8RJP2|RHIE_DICD3	108	2e-23	Rhamnogalacturonate lyase OS=Dickeya dadantii (strain 3937) GN=rhiE PE=1 SV=1	--	--	--	--	--	K18195//rhamnogalacturonan endolyase [EC:4.2.2.23]	0	844	cmo:103491889	--	GO:0044238//primary metabolic process;GO:0008152//metabolic process	GO:0005488//binding;GO:0003824//catalytic activity	-	--	--	--	--	--	--	--	--	--	--	--	--	--	--	--	--	--	--	--
Unigene0000741	1265	2	0.0234	gi|659098610|ref|XP_008450226.1|	694	0	PREDICTED: probable rhamnogalacturonate lyase B [Cucumis melo]	sp|Q8RJP2|RHIE_DICD3	99.4	4e-21	Rhamnogalacturonate lyase OS=Dickeya dadantii (strain 3937) GN=rhiE PE=1 SV=1	--	--	--	--	--	K18195//rhamnogalacturonan endolyase [EC:4.2.2.23]	0	694	cmo:103491889	--	GO:0008152//metabolic process;GO:0044238//primary metabolic process	GO:0003824//catalytic activity;GO:0005488//binding	-	--	--	--	--	--	--	--	--	--	--	--	--	--	--	--	--	--	--	--
Unigene0000742	221	15	1.0036	gi|590641233|ref|XP_007030175.1|	80.9	5e-19	Vacuolar ATP synthase catalytic subunit-related / V-ATPase-related / vacuolar proton pump-related [Theobroma cacao]	--	--	--	--	--	--	--	--	--	--	--	--	--	--	--	-	-	-	--	--	--	--	--	--	--	--	--	--	--	--	--	--	--	--	--	--	--
Unigene0000743	849	200	3.4833	gi|659074551|ref|XP_008437664.1|	328	2e-110	PREDICTED: small heat shock protein, chloroplastic [Cucumis melo]	sp|P30222|HS22C_PETHY	228	7e-72	Small heat shock protein, chloroplastic OS=Petunia hybrida GN=HSP22 PE=2 SV=1	At4g27670	216	1e-68	KOG0710	Molecular chaperone (small heat-shock protein Hsp26/Hsp42)	K13993//HSP20 family protein	7e-111	328	cmo:103483006	ko04141//Protein processing in endoplasmic reticulum//Folding, sorting and degradation//Genetic Information Processing	-	-	-	117	220	HSP20	Family	93.9	4e-27	--	--	--	--	--	--	--	--	--	--	--	--	--
Unigene0000744	230	18	1.1572	--	--	--	--	--	--	--	--	--	--	--	--	--	--	--	--	--	--	--	-	-	-	--	--	--	--	--	--	--	--	--	--	--	--	--	--	--	--	--	--	--
Unigene0000745	852	78	1.3537	--	--	--	--	--	--	--	--	--	--	--	--	--	--	--	--	--	--	--	-	-	-	--	--	--	--	--	--	--	--	--	--	--	--	--	--	--	--	--	--	--
Unigene0000746	277	17	0.9075	--	--	--	--	--	--	--	--	--	--	--	--	--	--	--	--	--	--	--	-	-	-	--	--	--	--	--	--	--	--	--	--	--	--	--	--	--	--	--	--	--
Unigene0000747	209	8	0.566	--	--	--	--	--	--	--	--	--	--	--	--	--	--	--	--	--	--	--	-	-	-	--	--	--	--	--	--	--	--	--	--	--	--	--	--	--	--	--	--	--
Unigene0000748	663	80	1.7842	gi|590587294|ref|XP_007015930.1|	151	4e-43	Stress responsive A/B Barrel Domain [Theobroma cacao]	sp|Q9LUV2|POP3_ARATH	87.4	2e-20	Probable protein Pop3 OS=Arabidopsis thaliana GN=At3g17210 PE=1 SV=1	--	--	--	--	--	--	--	--	--	--	--	-	GO:0005488//binding;GO:0043167//ion binding;GO:0043169//cation binding	GO:0009536//plastid;GO:0044424//intracellular part;GO:0005737//cytoplasm;GO:0043229//intracellular organelle;GO:0044464//cell part;GO:0044444//cytoplasmic part;GO:0043226//organelle;GO:0043231//intracellular membrane-bounded organelle;GO:0005622//intracellular;GO:0043227//membrane-bounded organelle;GO:0005623//cell	12	103	Dabb	Domain	77.1	9.2e-22	11	105	Dabb	6.2e-20	69.6	--	--	--	--	--	--	--	--
Unigene0000749	295	17	0.8521	--	--	--	--	--	--	--	--	--	--	--	--	--	--	--	--	--	--	--	-	-	-	--	--	--	--	--	--	--	--	--	--	--	--	--	--	--	--	--	--	--
Unigene0000750	405	34	1.2413	--	--	--	--	--	--	--	--	--	--	--	--	--	--	--	--	--	--	--	-	-	-	--	--	--	--	--	--	--	--	--	--	--	--	--	--	--	--	--	--	--
Unigene0000751	216	9	0.6161	--	--	--	--	--	--	--	--	--	--	--	--	--	--	--	--	--	--	--	-	-	-	--	--	--	--	--	--	--	--	--	--	--	--	--	--	--	--	--	--	--
Unigene0000752	277	11	0.5872	gi|449440598|ref|XP_004138071.1|	183	3e-54	PREDICTED: DELLA protein GAI-like [Cucumis sativus]	sp|Q8S4W7|GAI1_VITVI	69.7	1e-13	DELLA protein GAI1 OS=Vitis vinifera GN=GAI1 PE=2 SV=1	--	--	--	--	--	--	--	--	--	--	--	GO:0009987//cellular process;GO:1901576//organic substance biosynthetic process;GO:0044237//cellular metabolic process;GO:0034645//cellular macromolecule biosynthetic process;GO:0044249//cellular biosynthetic process;GO:0010468//regulation of gene expression;GO:0060255//regulation of macromolecule metabolic process;GO:0008152//metabolic process;GO:0019222//regulation of metabolic process;GO:00717…	-	-	2	92	GRAS	Family	68.4	4.1e-19	--	--	--	--	--	GRAS	--	--	--	--	--	--	--
Unigene0000753	740	117	2.3379	--	--	--	--	--	--	--	--	--	--	--	--	--	--	--	--	--	--	--	-	-	-	--	--	--	--	--	--	--	--	--	--	--	--	--	--	--	--	--	--	--
Unigene0000754	285	13	0.6745	gi|387965727|gb|AFK13856.1|	76.6	6e-15	Ty3/gypsy retrotransposon protein [Beta vulgaris subsp. vulgaris]	--	--	--	--	At1g35370_2	47.8	9e-07	KOG0017	FOG: Transposon-encoded proteins with TYA, reverse transcriptase, integrase domains in various combinations	--	--	--	--	--	--	GO:0044237//cellular metabolic process;GO:0046483//heterocycle metabolic process;GO:0032774//RNA biosynthetic process;GO:0016070//RNA metabolic process;GO:0009058//biosynthetic process;GO:0006139//nucleobase-containing compound metabolic process;GO:1901360//organic cyclic compound metabolic process;GO:0044249//cellular biosynthetic process;GO:0008152//metabolic process;GO:1901576//organic substan…	-	-	--	--	--	--	--	--	--	--	--	--	--	--	--	--	--	--	--	--	--
Unigene0000755	263	10	0.5622	gi|703131620|ref|XP_010104920.1|	123	1e-32	Transposon Ty3-I Gag-Pol polyprotein [Morus notabilis]	sp|Q99315|YG31B_YEAST	57	4e-09	Transposon Ty3-G Gag-Pol polyprotein OS=Saccharomyces cerevisiae (strain ATCC 204508 / S288c) GN=TY3B-G PE=1 SV=3	At2g05610	85.5	7e-20	KOG0017	FOG: Transposon-encoded proteins with TYA, reverse transcriptase, integrase domains in various combinations	--	--	--	--	--	--	GO:0006139//nucleobase-containing compound metabolic process;GO:0043170//macromolecule metabolic process;GO:0046483//heterocycle metabolic process;GO:0044699//single-organism process;GO:0006725//cellular aromatic compound metabolic process;GO:1901360//organic cyclic compound metabolic process;GO:0090304//nucleic acid metabolic process;GO:0034641//cellular nitrogen compound metabolic process;GO:00…	GO:0005215//transporter activity;GO:0005488//binding;GO:0003824//catalytic activity;GO:0097159//organic cyclic compound binding	GO:0043229//intracellular organelle;GO:0043227//membrane-bounded organelle;GO:0043226//organelle;GO:0044425//membrane part;GO:0016020//membrane;GO:0044424//intracellular part;GO:0005622//intracellular;GO:0005623//cell;GO:0031224//intrinsic component of membrane;GO:0044464//cell part;GO:0043231//intracellular membrane-bounded organelle	--	--	--	--	--	--	--	--	--	--	--	--	PRGDB00061511	disease resistance protein	Putative_R-Genes,_collected_from_NCBI_Protein	Brassica rapa subsp. pekinensis	TNL	2e-27	108
Unigene0000756	281	20	1.0524	--	--	--	--	--	--	--	--	--	--	--	--	--	--	--	--	--	--	--	-	-	-	--	--	--	--	--	--	--	--	--	--	--	--	--	--	--	--	--	--	--
Unigene0000757	1019	149	2.1621	gi|356515955|ref|XP_003526662.1|	145	3e-38	PREDICTED: vitellogenin-2-like [Glycine max]	--	--	--	--	--	--	--	--	--	--	--	--	--	--	--	-	-	-	--	--	--	--	--	--	--	--	--	--	--	--	--	--	--	--	--	--	--
Unigene0000758	952	28	0.4349	gi|356515955|ref|XP_003526662.1|	145	2e-38	PREDICTED: vitellogenin-2-like [Glycine max]	--	--	--	--	--	--	--	--	--	--	--	--	--	--	--	-	-	-	--	--	--	--	--	--	--	--	--	--	--	--	--	--	--	--	--	--	--
Unigene0000759	412	0	0	gi|778722801|ref|XP_011658571.1|	191	5e-57	PREDICTED: pentatricopeptide repeat-containing protein At2g36730 isoform X2 [Cucumis sativus]	sp|Q9ZQA1|PP188_ARATH	120	3e-31	Pentatricopeptide repeat-containing protein At2g36730 OS=Arabidopsis thaliana GN=PCMP-E44 PE=3 SV=1	At2g36730	120	5e-32	KOG4197	FOG: PPR repeat	--	--	--	--	--	--	GO:0044699//single-organism process;GO:0008152//metabolic process;GO:0044238//primary metabolic process;GO:0044763//single-organism cellular process;GO:0071704//organic substance metabolic process;GO:0043170//macromolecule metabolic process;GO:0009987//cellular process;GO:0019538//protein metabolic process	GO:0001883//purine nucleoside binding;GO:0016817//hydrolase activity, acting on acid anhydrides;GO:0016787//hydrolase activity;GO:0003824//catalytic activity;GO:0017111//nucleoside-triphosphatase activity;GO:0097367//carbohydrate derivative binding;GO:0032549//ribonucleoside binding;GO:0032550//purine ribonucleoside binding;GO:0016462//pyrophosphatase activity;GO:0016887//ATPase activity;GO:00168…	-	--	--	--	--	--	--	--	--	--	--	--	--	--	--	--	--	--	--	--
Unigene0000760	1585	415	3.8716	gi|449461643|ref|XP_004148551.1|	936	0	PREDICTED: pentatricopeptide repeat-containing protein At2g36730 isoform X1 [Cucumis sativus]	sp|Q9ZQA1|PP188_ARATH	590	0	Pentatricopeptide repeat-containing protein At2g36730 OS=Arabidopsis thaliana GN=PCMP-E44 PE=3 SV=1	At2g36730	590	0	KOG4197	FOG: PPR repeat	--	--	--	--	--	--	GO:0044763//single-organism cellular process;GO:0044699//single-organism process;GO:0044238//primary metabolic process;GO:0008152//metabolic process;GO:0009987//cellular process;GO:0043170//macromolecule metabolic process;GO:0019538//protein metabolic process;GO:0071704//organic substance metabolic process	GO:0036094//small molecule binding;GO:0001882//nucleoside binding;GO:0016887//ATPase activity;GO:0016817//hydrolase activity, acting on acid anhydrides;GO:0070011//peptidase activity, acting on L-amino acid peptides;GO:0004175//endopeptidase activity;GO:0017111//nucleoside-triphosphatase activity;GO:0016787//hydrolase activity;GO:0008233//peptidase activity;GO:0097159//organic cyclic compound bin…	-	99|170|198|271|300|371	142|195|228|297|327|395	PPR_2|PPR|PPR|PPR|PPR|PPR	Repeat|Family|Family|Family|Family|Family	35.8|18.9|22.4|10.1|22.2|16.6	5.3e-09|0.0009|6.8e-05|0.6|8.1e-05|0.005	--	--	--	--	--	--	PRGDB00183352	GSVIVT01015461001	Putative_R-Genes,_predicted_from_Pythozome	Vitis vinifera	N	4e-67	240
Unigene0000761	234	12	0.7583	--	--	--	--	--	--	--	--	--	--	--	--	--	--	--	--	--	--	--	-	-	-	--	--	--	--	--	--	--	--	--	--	--	--	--	--	--	--	--	--	--
Unigene0000762	503	63	1.852	--	--	--	--	--	--	--	--	--	--	--	--	--	--	--	--	--	--	--	-	-	-	--	--	--	--	--	--	--	--	--	--	--	--	--	--	--	--	--	--	--
Unigene0000763	288	48	2.4644	gi|449445363|ref|XP_004140442.1|	131	5e-34	PREDICTED: disease resistance protein RGA2-like [Cucumis sativus]	sp|Q7XBQ9|RGA2_SOLBU	63.9	2e-11	Disease resistance protein RGA2 OS=Solanum bulbocastanum GN=RGA2 PE=1 SV=1	At3g14460	64.3	3e-12	KOG4658	Apoptotic ATPase	--	--	--	--	--	--	-	GO:0032550//purine ribonucleoside binding;GO:0005488//binding;GO:0036094//small molecule binding;GO:0001883//purine nucleoside binding;GO:1901363//heterocyclic compound binding;GO:0032549//ribonucleoside binding;GO:0097159//organic cyclic compound binding;GO:0097367//carbohydrate derivative binding;GO:0001882//nucleoside binding	-	--	--	--	--	--	--	--	--	--	--	--	--	PRGDB00151848	Cucsa.277260.1	Putative_R-Genes,_predicted_from_Pythozome	Pennisetum glaucum	NL	3e-35	130
Unigene0000764	325	25	1.1374	gi|449467092|ref|XP_004151259.1|	161	1e-44	PREDICTED: pentatricopeptide repeat-containing protein At3g49170, chloroplastic [Cucumis sativus]	sp|Q5G1T1|PP272_ARATH	136	1e-36	Pentatricopeptide repeat-containing protein At3g49170, chloroplastic OS=Arabidopsis thaliana GN=EMB2261 PE=2 SV=1	At4g33170	119	4e-31	KOG4197	FOG: PPR repeat	--	--	--	--	--	--	GO:0003006//developmental process involved in reproduction;GO:0032502//developmental process;GO:0022414//reproductive process	GO:0016462//pyrophosphatase activity;GO:0016887//ATPase activity;GO:0016817//hydrolase activity, acting on acid anhydrides;GO:0016787//hydrolase activity;GO:0017111//nucleoside-triphosphatase activity;GO:0003824//catalytic activity;GO:0042623//ATPase activity, coupled;GO:0016818//hydrolase activity, acting on acid anhydrides, in phosphorus-containing anhydrides	GO:0005623//cell;GO:0044464//cell part;GO:0043227//membrane-bounded organelle;GO:0009536//plastid;GO:0043229//intracellular organelle;GO:0005622//intracellular;GO:0043231//intracellular membrane-bounded organelle;GO:0005737//cytoplasm;GO:0044424//intracellular part;GO:0043226//organelle;GO:0044444//cytoplasmic part	2	66	DYW_deaminase	Family	54.4	1.1e-14	--	--	--	--	--	--	--	--	--	--	--	--	--
Unigene0000765	507	52	1.5166	--	--	--	--	--	--	--	--	--	--	--	--	--	--	--	--	--	--	--	-	-	-	--	--	--	--	--	--	--	--	--	--	--	--	--	--	--	--	--	--	--
Unigene0000766	294	0	0	--	--	--	--	--	--	--	--	--	--	--	--	--	--	--	--	--	--	--	-	-	-	--	--	--	--	--	--	--	--	--	--	--	--	--	--	--	--	--	--	--
Unigene0000767	660	435	9.7457	gi|115485585|ref|NP_001067936.1|	114	3e-30	Os11g0496500 [Oryza sativa Japonica Group]	--	--	--	--	At5g08390	66.2	5e-12	KOG0267	Microtubule severing protein katanin p80 subunit B (contains WD40 repeats)	--	--	--	--	--	--	-	-	-	1	67	DUF3339	Family	116.4	4.5e-34	--	--	--	--	--	--	--	--	--	--	--	--	--
Unigene0000768	281	22	1.1577	gi|659133441|ref|XP_008466731.1|	169	2e-49	PREDICTED: aspartic proteinase Asp1-like [Cucumis melo]	sp|Q0IU52|ASP1_ORYSJ	61.6	5e-11	Aspartic proteinase Asp1 OS=Oryza sativa subsp. japonica GN=ASP1 PE=2 SV=1	At1g77480	124	4e-34	KOG1339	Aspartyl protease	--	--	--	--	--	--	GO:0043170//macromolecule metabolic process;GO:0019538//protein metabolic process;GO:0008152//metabolic process;GO:0071704//organic substance metabolic process;GO:0044238//primary metabolic process	GO:0004175//endopeptidase activity;GO:0003824//catalytic activity;GO:0016787//hydrolase activity;GO:0070011//peptidase activity, acting on L-amino acid peptides;GO:0008233//peptidase activity	-	--	--	--	--	--	--	--	--	--	--	--	--	--	--	--	--	--	--	--
Unigene0000769	285	17	0.882	--	--	--	--	--	--	--	--	--	--	--	--	--	--	--	--	--	--	--	-	-	-	--	--	--	--	--	--	--	--	--	--	--	--	--	--	--	--	--	--	--
Unigene0000770	707	0	0	--	--	--	--	--	--	--	--	--	--	--	--	--	--	--	--	--	--	--	-	-	-	--	--	--	--	--	--	--	--	--	--	--	--	--	--	--	--	--	--	--
Unigene0000771	708	29	0.6057	--	--	--	--	--	--	--	--	--	--	--	--	--	--	--	--	--	--	--	-	-	-	--	--	--	--	--	--	--	--	--	--	--	--	--	--	--	--	--	--	--
Unigene0000772	212	8	0.558	gi|299474487|gb|ADJ18449.1|	109	1e-26	gag/pol protein [Bryonia dioica]	sp|P10978|POLX_TOBAC	54.7	2e-08	Retrovirus-related Pol polyprotein from transposon TNT 1-94 OS=Nicotiana tabacum PE=2 SV=1	At4g03810	85.9	3e-20	KOG0017	FOG: Transposon-encoded proteins with TYA, reverse transcriptase, integrase domains in various combinations	--	--	--	--	--	--	GO:0043170//macromolecule metabolic process;GO:0044238//primary metabolic process;GO:0071704//organic substance metabolic process;GO:0034641//cellular nitrogen compound metabolic process;GO:1901360//organic cyclic compound metabolic process;GO:0046483//heterocycle metabolic process;GO:0009987//cellular process;GO:0006807//nitrogen compound metabolic process;GO:0006725//cellular aromatic compound …	GO:0097159//organic cyclic compound binding;GO:1901363//heterocyclic compound binding;GO:0016787//hydrolase activity;GO:0005488//binding;GO:0003676//nucleic acid binding;GO:0046914//transition metal ion binding;GO:0003824//catalytic activity;GO:0046872//metal ion binding;GO:0043167//ion binding;GO:0043169//cation binding	-	1	67	rve	Domain	37.4	2.1e-09	--	--	--	--	--	--	--	--	--	--	--	--	--
Unigene0000773	771	126	2.4165	gi|802627439|ref|XP_012076686.1|	385	6e-129	PREDICTED: polyol transporter 5-like [Jatropha curcas]	sp|Q8VZ80|PLT5_ARATH	297	2e-95	Polyol transporter 5 OS=Arabidopsis thaliana GN=PLT5 PE=1 SV=2	At3g18830	297	3e-96	KOG0254	Predicted transporter (major facilitator superfamily)	--	--	--	--	--	--	GO:0051179//localization;GO:0044710//single-organism metabolic process;GO:0009987//cellular process;GO:1902578//single-organism localization;GO:0051234//establishment of localization;GO:0008152//metabolic process;GO:0044699//single-organism process;GO:0044763//single-organism cellular process;GO:0006810//transport;GO:0044765//single-organism transport	GO:0016491//oxidoreductase activity;GO:0016628//oxidoreductase activity, acting on the CH-CH group of donors, NAD or NADP as acceptor;GO:0022857//transmembrane transporter activity;GO:0003824//catalytic activity;GO:0005215//transporter activity;GO:0016627//oxidoreductase activity, acting on the CH-CH group of donors	GO:0031224//intrinsic component of membrane;GO:0044425//membrane part;GO:0016020//membrane	10	255	Sugar_tr	Family	203.1	5.4e-60	--	--	--	--	--	--	--	--	--	--	--	--	--
Unigene0000774	309	24	1.1485	gi|802627439|ref|XP_012076686.1|	66.2	2e-11	PREDICTED: polyol transporter 5-like [Jatropha curcas]	sp|Q0WUU6|PLT4_ARATH	55.8	9e-09	Probable polyol transporter 4 OS=Arabidopsis thaliana GN=PLT4 PE=2 SV=1	At3g18830	52.4	2e-08	KOG0254	Predicted transporter (major facilitator superfamily)	--	--	--	--	--	--	GO:0044763//single-organism cellular process;GO:0051234//establishment of localization;GO:0051179//localization;GO:0009987//cellular process;GO:0044699//single-organism process	GO:0005215//transporter activity;GO:0022857//transmembrane transporter activity	GO:0031224//intrinsic component of membrane;GO:0044425//membrane part;GO:0016020//membrane	--	--	--	--	--	--	--	--	--	--	--	--	--	--	--	--	--	--	--
Unigene0000775	386	21	0.8045	gi|674871371|emb|CDY63174.1|	67.8	7e-13	BnaC02g47840D [Brassica napus]	--	--	--	--	--	--	--	--	--	--	--	--	--	--	--	-	GO:0003676//nucleic acid binding;GO:0097159//organic cyclic compound binding;GO:0005488//binding;GO:1901363//heterocyclic compound binding;GO:0005515//protein binding	GO:0044425//membrane part;GO:0031224//intrinsic component of membrane;GO:0016020//membrane	--	--	--	--	--	--	--	--	--	--	--	--	--	--	--	--	--	--	--
Unigene0000776	417	45	1.5957	--	--	--	--	--	--	--	--	--	--	--	--	--	--	--	--	--	--	--	-	-	-	--	--	--	--	--	--	--	--	--	--	--	--	--	--	--	--	--	--	--
Unigene0000777	334	0	0	--	--	--	--	--	--	--	--	--	--	--	--	--	--	--	--	--	--	--	-	-	-	--	--	--	--	--	--	--	--	--	--	--	--	--	--	--	--	--	--	--
Unigene0000778	332	0	0	--	--	--	--	--	--	--	--	--	--	--	--	--	--	--	--	--	--	--	-	-	-	--	--	--	--	--	--	--	--	--	--	--	--	--	--	--	--	--	--	--
Unigene0000779	220	13	0.8738	gi|46398239|gb|AAS91797.1|	53.1	3e-07	MuDRA-like transposase [Cucumis melo]	--	--	--	--	--	--	--	--	--	--	--	--	--	--	--	-	GO:0005488//binding	-	2	43	DBD_Tnp_Mut	Family	24.7	1.1e-05	--	--	--	--	--	--	--	--	--	--	--	--	--
Unigene0000780	326	31	1.4061	--	--	--	--	--	--	--	--	--	--	--	--	--	--	--	--	--	--	--	-	-	-	--	--	--	--	--	--	--	--	--	--	--	--	--	--	--	--	--	--	--
Unigene0000781	1338	1006	11.1176	gi|590599366|ref|XP_007019162.1|	599	0	DPP6 N-terminal domain-like protein [Theobroma cacao]	sp|Q28TS0|TOLB_JANSC	98.6	5e-21	Protein TolB OS=Jannaschia sp. (strain CCS1) GN=tolB PE=3 SV=1	--	--	--	--	--	--	--	--	--	--	--	-	-	-	188|228|284	217|267|305	PD40|PD40|PD40	Repeat|Repeat|Repeat	29.5|38.5|15.6	3.8e-07|5.7e-10|0.0085	--	--	--	--	--	--	--	--	--	--	--	--	--
Unigene0000782	980	5	0.0754	gi|590599366|ref|XP_007019162.1|	369	1e-119	DPP6 N-terminal domain-like protein [Theobroma cacao]	--	--	--	--	--	--	--	--	--	--	--	--	--	--	--	GO:0019752//carboxylic acid metabolic process;GO:0043436//oxoacid metabolic process;GO:0006089//lactate metabolic process;GO:0044710//single-organism metabolic process;GO:0044763//single-organism cellular process;GO:0071704//organic substance metabolic process;GO:0044699//single-organism process;GO:0006082//organic acid metabolic process;GO:0044281//small molecule metabolic process;GO:0032787//mo…	-	GO:0031090//organelle membrane;GO:0005622//intracellular;GO:0005618//cell wall;GO:0030312//external encapsulating structure;GO:0043229//intracellular organelle;GO:0043227//membrane-bounded organelle;GO:0044424//intracellular part;GO:0005623//cell;GO:0043231//intracellular membrane-bounded organelle;GO:0044464//cell part;GO:0044422//organelle part;GO:0043226//organelle;GO:0071944//cell periphery;G…	--	--	--	--	--	--	--	--	--	--	--	--	--	--	--	--	--	--	--
Unigene0000783	1038	4	0.057	gi|590599366|ref|XP_007019162.1|	364	2e-117	DPP6 N-terminal domain-like protein [Theobroma cacao]	--	--	--	--	--	--	--	--	--	--	--	--	--	--	--	GO:0009987//cellular process;GO:1901615//organic hydroxy compound metabolic process;GO:0044699//single-organism process;GO:0071704//organic substance metabolic process;GO:0043436//oxoacid metabolic process;GO:0044763//single-organism cellular process;GO:0044281//small molecule metabolic process;GO:0044710//single-organism metabolic process;GO:0006089//lactate metabolic process;GO:0032787//monocar…	-	GO:0044422//organelle part;GO:0005622//intracellular;GO:0044424//intracellular part;GO:0043229//intracellular organelle;GO:0043227//membrane-bounded organelle;GO:0005618//cell wall;GO:0043226//organelle;GO:0030312//external encapsulating structure;GO:0043231//intracellular membrane-bounded organelle;GO:0031090//organelle membrane;GO:0005623//cell;GO:0071944//cell periphery;GO:0044464//cell part;G…	--	--	--	--	--	--	--	--	--	--	--	--	--	--	--	--	--	--	--
Unigene0000784	1156	1680	21.4891	gi|823242653|ref|XP_012453996.1|	207	1e-62	PREDICTED: probable serine/threonine-protein kinase DDB_G0291350 isoform X1 [Gossypium raimondii]	--	--	--	--	--	--	--	--	--	--	--	--	--	--	--	-	-	-	--	--	--	--	--	--	--	--	--	--	--	--	--	--	--	--	--	--	--
Unigene0000785	418	22	0.7782	--	--	--	--	--	--	--	--	--	--	--	--	--	--	--	--	--	--	--	-	-	-	--	--	--	--	--	--	--	--	--	--	--	--	--	--	--	--	--	--	--
Unigene0000786	209	12	0.849	--	--	--	--	--	--	--	--	--	--	--	--	--	--	--	--	--	--	--	-	-	-	--	--	--	--	--	--	--	--	--	--	--	--	--	--	--	--	--	--	--
Unigene0000787	246	10	0.6011	--	--	--	--	--	--	--	--	--	--	--	--	--	--	--	--	--	--	--	-	-	-	--	--	--	--	--	--	--	--	--	--	--	--	--	--	--	--	--	--	--
Unigene0000788	594	3830	95.341	gi|357493539|ref|XP_003617058.1|	58.9	2e-08	22.0 kDa heat shock protein [Medicago truncatula]	--	--	--	--	At5g04890	47	6e-06	KOG0710	Molecular chaperone (small heat-shock protein Hsp26/Hsp42)	--	--	--	--	--	--	GO:0050896//response to stimulus	-	-	--	--	--	--	--	--	--	--	--	--	--	--	--	--	--	--	--	--	--
Unigene0000789	1514	190	1.8556	gi|659098016|ref|XP_008449933.1|	656	0	PREDICTED: LOW QUALITY PROTEIN: probable GPI-anchored adhesin-like protein PGA55 [Cucumis melo]	sp|F4HXQ7|MYOB1_ARATH	159	5e-40	Myosin-binding protein 1 OS=Arabidopsis thaliana GN=MYOB1 PE=1 SV=1	--	--	--	--	--	--	--	--	--	--	--	-	-	-	99	192	Zein-binding	Family	104.5	2.2e-30	--	--	--	--	--	--	--	--	--	--	--	--	--
Unigene0000790	489	33	0.9979	--	--	--	--	--	--	--	--	--	--	--	--	--	--	--	--	--	--	--	-	-	-	--	--	--	--	--	--	--	--	--	--	--	--	--	--	--	--	--	--	--
Unigene0000791	620	51	1.2163	gi|778713847|ref|XP_011657142.1|	235	2e-71	PREDICTED: pentatricopeptide repeat-containing protein At1g11290-like [Cucumis sativus]	sp|Q9SIT7|PP151_ARATH	92.4	6e-20	Pentatricopeptide repeat-containing protein At2g13600 OS=Arabidopsis thaliana GN=PCMP-E76 PE=3 SV=1	At2g13600	92.4	9e-21	KOG4197	FOG: PPR repeat	--	--	--	--	--	--	-	-	-	115|140	138|181	PPR|PPR_2	Family|Repeat	16.0|38.0	0.0078|1.1e-09	--	--	--	--	--	--	PRGDB00183352	GSVIVT01015461001	Putative_R-Genes,_predicted_from_Pythozome	Vitis vinifera	N	9e-26	107
Unigene0000792	407	8	0.2906	gi|590626097|ref|XP_007026070.1|	201	6e-59	Homer protein isoform 2 [Theobroma cacao]	--	--	--	--	--	--	--	--	--	--	--	--	--	--	--	-	-	-	--	--	--	--	--	--	--	--	--	--	--	--	--	--	--	--	--	--	--
Unigene0000793	1112	1	0.0133	gi|590626097|ref|XP_007026070.1|	316	2e-98	Homer protein isoform 2 [Theobroma cacao]	--	--	--	--	--	--	--	--	--	--	--	--	--	--	--	-	-	-	--	--	--	--	--	--	--	--	--	--	--	--	--	--	--	--	--	--	--
Unigene0000794	1107	0	0	gi|590626097|ref|XP_007026070.1|	197	2e-54	Homer protein isoform 2 [Theobroma cacao]	--	--	--	--	--	--	--	--	--	--	--	--	--	--	--	-	-	-	--	--	--	--	--	--	--	--	--	--	--	--	--	--	--	--	--	--	--
Unigene0000795	451	26	0.8524	--	--	--	--	--	--	--	--	--	--	--	--	--	--	--	--	--	--	--	-	-	-	--	--	--	--	--	--	--	--	--	--	--	--	--	--	--	--	--	--	--
Unigene0000796	373	34	1.3478	--	--	--	--	--	--	--	--	--	--	--	--	--	--	--	--	--	--	--	-	-	-	--	--	--	--	--	--	--	--	--	--	--	--	--	--	--	--	--	--	--
Unigene0000797	282	25	1.3109	--	--	--	--	--	--	--	--	--	--	--	--	--	--	--	--	--	--	--	-	-	-	--	--	--	--	--	--	--	--	--	--	--	--	--	--	--	--	--	--	--
Unigene0000798	1093	1599	21.632	gi|270308988|dbj|BAI52947.1|	552	0	red chlorophyll catabolite reductase [Citrullus lanatus subsp. vulgaris]	sp|Q8LDU4|RCCR_ARATH	272	7e-87	Red chlorophyll catabolite reductase, chloroplastic OS=Arabidopsis thaliana GN=RCCR PE=1 SV=2	--	--	--	--	--	K13545//red chlorophyll catabolite reductase [EC:1.3.1.80]	0	544	cmo:103497431	ko00860//Porphyrin and chlorophyll metabolism//Metabolism of cofactors and vitamins//Metabolism	GO:0019439//aromatic compound catabolic process;GO:0019637//organophosphate metabolic process;GO:0006950//response to stress;GO:0044237//cellular metabolic process;GO:0071704//organic substance metabolic process;GO:0044271//cellular nitrogen compound biosynthetic process;GO:0006753//nucleoside phosphate metabolic process;GO:0044260//cellular macromolecule metabolic process;GO:0044257//cellular pr…	GO:0003824//catalytic activity;GO:0043169//cation binding;GO:0043167//ion binding;GO:0016636//oxidoreductase activity, acting on the CH-CH group of donors, iron-sulfur protein as acceptor;GO:0016491//oxidoreductase activity;GO:0005488//binding;GO:0046872//metal ion binding;GO:0046914//transition metal ion binding;GO:0016627//oxidoreductase activity, acting on the CH-CH group of donors	GO:0044422//organelle part;GO:0044446//intracellular organelle part;GO:0044464//cell part;GO:0005622//intracellular;GO:0043231//intracellular membrane-bounded organelle;GO:0005623//cell;GO:0031967//organelle envelope;GO:0044424//intracellular part;GO:0043226//organelle;GO:0044444//cytoplasmic part;GO:0044435//plastid part;GO:0005737//cytoplasm;GO:0043229//intracellular organelle;GO:0031975//envel…	62	315	RCC_reductase	Family	369.9	3.8e-111	--	--	--	--	--	--	--	--	--	--	--	--	--
Unigene0000799	412	26	0.9331	--	--	--	--	--	--	--	--	--	--	--	--	--	--	--	--	--	--	--	-	-	-	--	--	--	--	--	--	--	--	--	--	--	--	--	--	--	--	--	--	--
Unigene0000800	322	17	0.7807	--	--	--	--	--	--	--	--	--	--	--	--	--	--	--	--	--	--	--	-	-	-	--	--	--	--	--	--	--	--	--	--	--	--	--	--	--	--	--	--	--
Unigene0000801	338	21	0.9187	--	--	--	--	--	--	--	--	--	--	--	--	--	--	--	--	--	--	--	-	-	-	--	--	--	--	--	--	--	--	--	--	--	--	--	--	--	--	--	--	--
Unigene0000802	486	74	2.2515	--	--	--	--	--	--	--	--	--	--	--	--	--	--	--	--	--	--	--	-	-	-	--	--	--	--	--	--	--	--	--	--	--	--	--	--	--	--	--	--	--
Unigene0000803	433	12	0.4098	--	--	--	--	--	--	--	--	--	--	--	--	--	--	--	--	--	--	--	-	-	-	--	--	--	--	--	--	--	--	--	--	--	--	--	--	--	--	--	--	--
Unigene0000804	402	6	0.2207	--	--	--	--	--	--	--	--	--	--	--	--	--	--	--	--	--	--	--	-	-	-	--	--	--	--	--	--	--	--	--	--	--	--	--	--	--	--	--	--	--
Unigene0000805	241	10	0.6136	--	--	--	--	--	--	--	--	--	--	--	--	--	--	--	--	--	--	--	-	-	-	--	--	--	--	--	--	--	--	--	--	--	--	--	--	--	--	--	--	--
Unigene0000806	277	16	0.8541	--	--	--	--	--	--	--	--	--	--	--	--	--	--	--	--	--	--	--	-	-	-	--	--	--	--	--	--	--	--	--	--	--	--	--	--	--	--	--	--	--
Unigene0000807	240	14	0.8626	--	--	--	--	--	--	--	--	--	--	--	--	--	--	--	--	--	--	--	-	-	-	--	--	--	--	--	--	--	--	--	--	--	--	--	--	--	--	--	--	--
Unigene0000808	528	44	1.2322	--	--	--	--	--	--	--	--	--	--	--	--	--	--	--	--	--	--	--	-	-	-	--	--	--	--	--	--	--	--	--	--	--	--	--	--	--	--	--	--	--
Unigene0000809	681	612	13.2884	gi|449448014|ref|XP_004141761.1|	187	5e-58	PREDICTED: cytochrome c oxidase assembly protein COX19-like [Cucumis sativus]	sp|A8E4L1|COX19_BOVIN	80.1	8e-18	Cytochrome c oxidase assembly protein COX19 OS=Bos taurus GN=COX19 PE=3 SV=1	At1g66590	149	1e-44	KOG3477	Putative cytochrome c oxidase, subunit COX19	K18183//cytochrome c oxidase assembly protein subunit 19	2e-58	187	csv:101219086	--	-	-	-	31	65	CHCH	Domain	33.9	1.8e-08	--	--	--	--	--	--	--	--	--	--	--	--	--
Unigene0000810	354	1	0.0418	gi|659124474|ref|XP_008462179.1|	139	4e-41	PREDICTED: cytochrome c oxidase assembly protein COX19-like [Cucumis melo]	sp|Q4P821|COX19_USTMA	65.1	1e-12	Cytochrome c oxidase assembly protein COX19 OS=Ustilago maydis (strain 521 / FGSC 9021) GN=COX19 PE=3 SV=1	At1g66590	121	3e-35	KOG3477	Putative cytochrome c oxidase, subunit COX19	K18183//cytochrome c oxidase assembly protein subunit 19	2e-41	139	cmo:103500603	--	-	-	-	31	65	CHCH	Domain	35.1	7.8e-09	--	--	--	--	--	--	--	--	--	--	--	--	--
Unigene0000811	243	11	0.6694	gi|566154762|ref|XP_006370603.1|	86.7	1e-18	bHLH family protein [Populus trichocarpa]	sp|P0CB23|Y4862_ARATH	64.3	9e-12	Uncharacterized protein At4g38062 OS=Arabidopsis thaliana GN=At4g38062 PE=4 SV=1	--	--	--	--	--	--	--	--	--	--	--	GO:1901576//organic substance biosynthetic process;GO:0009058//biosynthetic process;GO:0010468//regulation of gene expression;GO:0044260//cellular macromolecule metabolic process;GO:0009059//macromolecule biosynthetic process;GO:0065007//biological regulation;GO:0044237//cellular metabolic process;GO:0019222//regulation of metabolic process;GO:0009987//cellular process;GO:0071704//organic substan…	GO:0003676//nucleic acid binding;GO:1901363//heterocyclic compound binding;GO:0005488//binding;GO:0097159//organic cyclic compound binding;GO:0005515//protein binding	GO:0005622//intracellular;GO:0044424//intracellular part;GO:0043227//membrane-bounded organelle;GO:0043226//organelle;GO:0043229//intracellular organelle;GO:0044464//cell part;GO:0005623//cell;GO:0043231//intracellular membrane-bounded organelle	--	--	--	--	--	--	--	--	--	--	--	--	--	--	--	--	--	--	--
Unigene0000812	840	218	3.8375	gi|449467717|ref|XP_004151569.1|	396	1e-133	PREDICTED: UDP-glycosyltransferase 73C6-like [Cucumis sativus]	sp|Q9ZQ96|U73C3_ARATH	289	2e-92	UDP-glycosyltransferase 73C3 OS=Arabidopsis thaliana GN=UGT73C3 PE=2 SV=1	At2g36780	289	3e-93	KOG1192	UDP-glucuronosyl and UDP-glucosyl transferase	K13496//UDP-glucosyl transferase 73C [EC:2.4.1.-]	5e-134	396	csv:101214194	--	-	GO:0016757//transferase activity, transferring glycosyl groups;GO:0016740//transferase activity;GO:0003824//catalytic activity	-	--	--	--	--	--	--	--	--	--	--	--	--	--	--	--	--	--	--	--
Unigene0000813	235	9	0.5663	--	--	--	--	--	--	--	--	--	--	--	--	--	--	--	--	--	--	--	-	-	-	--	--	--	--	--	--	--	--	--	--	--	--	--	--	--	--	--	--	--
Unigene0000814	787	128	2.4049	gi|778679557|ref|XP_004140846.2|	420	4e-142	PREDICTED: pentatricopeptide repeat-containing protein At3g29230-like isoform X1 [Cucumis sativus]	sp|Q9SZT8|PP354_ARATH	207	2e-60	Pentatricopeptide repeat-containing protein ELI1, chloroplastic OS=Arabidopsis thaliana GN=ELI1 PE=3 SV=1	At4g37380	207	3e-61	KOG4197	FOG: PPR repeat	--	--	--	--	--	--	-	-	-	55|99|131	95|126|154	PPR_2|PPR_3|PPR	Repeat|Repeat|Family	41.0|10.3|17.5	1.2e-10|0.62|0.0026	--	--	--	--	--	--	PRGDB00183352	GSVIVT01015461001	Putative_R-Genes,_predicted_from_Pythozome	Vitis vinifera	N	9e-50	179
Unigene0000815	224	12	0.7921	gi|659077811|ref|XP_008439399.1|	143	1e-39	PREDICTED: pentatricopeptide repeat-containing protein At3g29230-like [Cucumis melo]	sp|Q9SJG6|PP200_ARATH	86.3	1e-19	Pentatricopeptide repeat-containing protein At2g42920, chloroplastic OS=Arabidopsis thaliana GN=PCMP-E75 PE=2 SV=1	At2g42920	86.3	2e-20	KOG4197	FOG: PPR repeat	--	--	--	--	--	--	-	-	-	4|37	34|74	PPR_1|PPR_2	Repeat|Repeat	28.2|46.1	8.1e-07|3.2e-12	--	--	--	--	--	--	--	--	--	--	--	--	--
Unigene0000816	492	28	0.8415	gi|659074917|ref|XP_008437865.1|	94.7	3e-22	PREDICTED: ORM1-like protein 3 [Cucumis melo]	--	--	--	--	At5g42000	89	1e-21	KOG3319	Predicted membrane protein	--	--	--	--	--	--	GO:0019637//organophosphate metabolic process;GO:0044255//cellular lipid metabolic process;GO:0044711//single-organism biosynthetic process;GO:0006796//phosphate-containing compound metabolic process;GO:0044260//cellular macromolecule metabolic process;GO:0008152//metabolic process;GO:0006629//lipid metabolic process;GO:0046474//glycerophospholipid biosynthetic process;GO:0044710//single-organism…	-	GO:0043229//intracellular organelle;GO:0043231//intracellular membrane-bounded organelle;GO:0044464//cell part;GO:0031090//organelle membrane;GO:0016020//membrane;GO:0044424//intracellular part;GO:0043226//organelle;GO:0043227//membrane-bounded organelle;GO:0044422//organelle part;GO:0044425//membrane part;GO:0005623//cell;GO:0005622//intracellular;GO:0031224//intrinsic component of membrane	1	37	ORMDL	Family	32.8	3.9e-08	--	--	--	--	--	--	--	--	--	--	--	--	--
Unigene0000817	980	5322	80.3001	gi|659074917|ref|XP_008437865.1|	323	3e-109	PREDICTED: ORM1-like protein 3 [Cucumis melo]	sp|Q921I0|ORML1_MOUSE	114	5e-29	ORM1-like protein 1 OS=Mus musculus GN=Ormdl1 PE=2 SV=1	At1g01230	288	1e-96	KOG3319	Predicted membrane protein	--	--	--	--	--	--	GO:0044237//cellular metabolic process;GO:0019637//organophosphate metabolic process;GO:0044699//single-organism process;GO:1901576//organic substance biosynthetic process;GO:0046486//glycerolipid metabolic process;GO:0071704//organic substance metabolic process;GO:0044711//single-organism biosynthetic process;GO:0008152//metabolic process;GO:0009058//biosynthetic process;GO:0009266//response to …	-	GO:0043227//membrane-bounded organelle;GO:0043226//organelle;GO:0031090//organelle membrane;GO:0031224//intrinsic component of membrane;GO:0044422//organelle part;GO:0044425//membrane part;GO:0016020//membrane	15	149	ORMDL	Family	175.8	2.6e-52	--	--	--	--	--	--	--	--	--	--	--	--	--
Unigene0000818	355	20	0.833	--	--	--	--	--	--	--	--	--	--	--	--	--	--	--	--	--	--	--	-	-	-	--	--	--	--	--	--	--	--	--	--	--	--	--	--	--	--	--	--	--
Unigene0000819	383	25	0.9652	gi|778680644|ref|XP_004145656.2|	253	2e-81	PREDICTED: GDSL esterase/lipase At1g71691 [Cucumis sativus]	sp|Q9FNP2|GDL75_ARATH	115	9e-30	GDSL esterase/lipase At5g08460 OS=Arabidopsis thaliana GN=At5g08460 PE=2 SV=1	--	--	--	--	--	--	--	--	--	--	--	GO:0044238//primary metabolic process;GO:0008152//metabolic process;GO:0044710//single-organism metabolic process;GO:0044237//cellular metabolic process;GO:0006629//lipid metabolic process;GO:0006720//isoprenoid metabolic process;GO:0071704//organic substance metabolic process;GO:0016119//carotene metabolic process;GO:0009987//cellular process;GO:0044255//cellular lipid metabolic process;GO:00422…	GO:0016787//hydrolase activity;GO:0016627//oxidoreductase activity, acting on the CH-CH group of donors;GO:0003824//catalytic activity;GO:0016491//oxidoreductase activity;GO:0016635//oxidoreductase activity, acting on the CH-CH group of donors, quinone or related compound as acceptor	-	3	114	Lipase_GDSL	Family	24.6	1.7e-05	--	--	--	--	--	--	--	--	--	--	--	--	--
Unigene0000820	231	19	1.2162	--	--	--	--	--	--	--	--	--	--	--	--	--	--	--	--	--	--	--	-	-	-	--	--	--	--	--	--	--	--	--	--	--	--	--	--	--	--	--	--	--
Unigene0000821	231	10	0.6401	--	--	--	--	--	--	--	--	--	--	--	--	--	--	--	--	--	--	--	-	-	-	--	--	--	--	--	--	--	--	--	--	--	--	--	--	--	--	--	--	--
Unigene0000822	784	10	0.1886	gi|659113642|ref|XP_008456682.1|	382	2e-129	PREDICTED: alpha-(1,4)-fucosyltransferase [Cucumis melo]	sp|Q9C8W3|FUT13_ARATH	318	3e-105	Alpha-(1,4)-fucosyltransferase OS=Arabidopsis thaliana GN=FUT13 PE=2 SV=2	At1g71990	317	5e-106	KOG2619	Fucosyltransferase	K14412//alpha-1,4-fucosyltransferase [EC:2.4.1.-]	9e-130	382	cmo:103496555	--	GO:0044237//cellular metabolic process;GO:0034645//cellular macromolecule biosynthetic process;GO:0044264//cellular polysaccharide metabolic process;GO:0036211//protein modification process;GO:0009059//macromolecule biosynthetic process;GO:0009987//cellular process;GO:0044710//single-organism metabolic process;GO:0044699//single-organism process;GO:0044711//single-organism biosynthetic process;GO…	GO:0016740//transferase activity;GO:0003824//catalytic activity;GO:0016757//transferase activity, transferring glycosyl groups;GO:0016758//transferase activity, transferring hexosyl groups	GO:0005622//intracellular;GO:0031224//intrinsic component of membrane;GO:0043226//organelle;GO:0044424//intracellular part;GO:0005623//cell;GO:0043227//membrane-bounded organelle;GO:0043229//intracellular organelle;GO:0043231//intracellular membrane-bounded organelle;GO:0044464//cell part;GO:0000139//Golgi membrane;GO:0044422//organelle part;GO:0031090//organelle membrane;GO:0005737//cytoplasm;GO…	3	181	Glyco_transf_10	Family	119.1	1.4e-34	--	--	--	--	--	--	--	--	--	--	--	--	--
Unigene0000823	1502	1332	13.113	gi|659113642|ref|XP_008456682.1|	754	0	PREDICTED: alpha-(1,4)-fucosyltransferase [Cucumis melo]	sp|Q9C8W3|FUT13_ARATH	594	0	Alpha-(1,4)-fucosyltransferase OS=Arabidopsis thaliana GN=FUT13 PE=2 SV=2	At1g71990	587	0	KOG2619	Fucosyltransferase	K14412//alpha-1,4-fucosyltransferase [EC:2.4.1.-]	0	754	cmo:103496555	--	GO:0044249//cellular biosynthetic process;GO:0044723//single-organism carbohydrate metabolic process;GO:0044710//single-organism metabolic process;GO:0006464//cellular protein modification process;GO:0033692//cellular polysaccharide biosynthetic process;GO:0044237//cellular metabolic process;GO:0005976//polysaccharide metabolic process;GO:0071704//organic substance metabolic process;GO:0044711//s…	GO:0016740//transferase activity;GO:0016757//transferase activity, transferring glycosyl groups;GO:0003824//catalytic activity;GO:0016758//transferase activity, transferring hexosyl groups	GO:0043226//organelle;GO:0043231//intracellular membrane-bounded organelle;GO:0005623//cell;GO:0031090//organelle membrane;GO:0005622//intracellular;GO:0043229//intracellular organelle;GO:0016020//membrane;GO:0044464//cell part;GO:0044422//organelle part;GO:0000139//Golgi membrane;GO:0012505//endomembrane system;GO:0043227//membrane-bounded organelle;GO:0098588//bounding membrane of organelle;GO:…	110	401	Glyco_transf_10	Family	129.6	8.8e-38	--	--	--	--	--	--	--	--	--	--	--	--	--
Unigene0000824	513	41	1.1818	--	--	--	--	--	--	--	--	--	--	--	--	--	--	--	--	--	--	--	-	-	-	--	--	--	--	--	--	--	--	--	--	--	--	--	--	--	--	--	--	--
Unigene0000825	1519	20	0.1947	gi|778696932|ref|XP_004145585.2|	604	0	PREDICTED: protein POLAR LOCALIZATION DURING ASYMMETRIC DIVISION AND REDISTRIBUTION-like [Cucumis sativus]	sp|Q6NQ99|POLAR_ARATH	120	6e-29	Protein POLAR LOCALIZATION DURING ASYMMETRIC DIVISION AND REDISTRIBUTION OS=Arabidopsis thaliana GN=POLAR PE=2 SV=1	--	--	--	--	--	--	--	--	--	--	--	-	-	-	--	--	--	--	--	--	--	--	--	--	--	--	--	--	--	--	--	--	--
Unigene0000826	1559	11	0.1043	gi|778696932|ref|XP_004145585.2|	603	0	PREDICTED: protein POLAR LOCALIZATION DURING ASYMMETRIC DIVISION AND REDISTRIBUTION-like [Cucumis sativus]	sp|Q6NQ99|POLAR_ARATH	121	4e-29	Protein POLAR LOCALIZATION DURING ASYMMETRIC DIVISION AND REDISTRIBUTION OS=Arabidopsis thaliana GN=POLAR PE=2 SV=1	--	--	--	--	--	--	--	--	--	--	--	-	-	-	--	--	--	--	--	--	--	--	--	--	--	--	--	--	--	--	--	--	--
Unigene0000827	308	53	2.5444	--	--	--	--	--	--	--	--	--	--	--	--	--	--	--	--	--	--	--	-	-	-	--	--	--	--	--	--	--	--	--	--	--	--	--	--	--	--	--	--	--
Unigene0000828	403	39	1.431	gi|778673954|ref|XP_011650094.1|	89	7e-20	PREDICTED: transcription repressor OFP8-like [Cucumis sativus]	--	--	--	--	--	--	--	--	--	--	--	--	--	--	--	-	-	-	--	--	--	--	--	--	--	--	--	--	--	--	--	--	--	--	--	--	--
Unigene0000829	842	3687	64.7483	gi|449453494|ref|XP_004144492.1|	248	2e-80	PREDICTED: transmembrane protein 97-like [Cucumis sativus]	sp|Q6DFQ5|TMM97_XENTR	58.5	3e-09	Transmembrane protein 97 OS=Xenopus tropicalis GN=tmem97 PE=2 SV=1	--	--	--	--	--	--	--	--	--	--	--	-	-	-	9	145	DUF2781	Family	110.8	4.5e-32	--	--	--	--	--	--	--	--	--	--	--	--	--
Unigene0000830	261	36	2.0395	--	--	--	--	--	--	--	--	--	--	--	--	--	--	--	--	--	--	--	-	-	-	--	--	--	--	--	--	--	--	--	--	--	--	--	--	--	--	--	--	--
Unigene0000831	212	14	0.9765	--	--	--	--	--	--	--	--	--	--	--	--	--	--	--	--	--	--	--	-	-	-	--	--	--	--	--	--	--	--	--	--	--	--	--	--	--	--	--	--	--
Unigene0000832	308	12	0.5761	--	--	--	--	--	--	--	--	--	--	--	--	--	--	--	--	--	--	--	-	-	-	--	--	--	--	--	--	--	--	--	--	--	--	--	--	--	--	--	--	--
Unigene0000833	337	21	0.9214	--	--	--	--	--	--	--	--	--	--	--	--	--	--	--	--	--	--	--	-	-	-	--	--	--	--	--	--	--	--	--	--	--	--	--	--	--	--	--	--	--
Unigene0000834	263	20	1.1245	--	--	--	--	--	--	--	--	--	--	--	--	--	--	--	--	--	--	--	-	-	-	--	--	--	--	--	--	--	--	--	--	--	--	--	--	--	--	--	--	--
Unigene0000835	209	13	0.9197	--	--	--	--	--	--	--	--	--	--	--	--	--	--	--	--	--	--	--	-	-	-	--	--	--	--	--	--	--	--	--	--	--	--	--	--	--	--	--	--	--
Unigene0000836	256	24	1.3862	gi|449433527|ref|XP_004134549.1|	164	1e-46	PREDICTED: protein CHUP1, chloroplastic-like [Cucumis sativus]	--	--	--	--	--	--	--	--	--	--	--	--	--	--	--	-	-	-	--	--	--	--	--	--	--	--	--	--	--	--	--	--	--	--	--	--	--
Unigene0000837	658	93	2.0899	--	--	--	--	--	--	--	--	--	--	--	--	--	--	--	--	--	--	--	-	-	-	--	--	--	--	--	--	--	--	--	--	--	--	--	--	--	--	--	--	--
Unigene0000838	272	17	0.9242	--	--	--	--	--	--	--	--	--	--	--	--	--	--	--	--	--	--	--	-	-	-	--	--	--	--	--	--	--	--	--	--	--	--	--	--	--	--	--	--	--
Unigene0000839	263	9	0.506	--	--	--	--	--	--	--	--	--	--	--	--	--	--	--	--	--	--	--	-	-	-	--	--	--	--	--	--	--	--	--	--	--	--	--	--	--	--	--	--	--
Unigene0000840	299	0	0	--	--	--	--	--	--	--	--	--	--	--	--	--	--	--	--	--	--	--	-	-	-	--	--	--	--	--	--	--	--	--	--	--	--	--	--	--	--	--	--	--
Unigene0000841	300	0	0	--	--	--	--	--	--	--	--	--	--	--	--	--	--	--	--	--	--	--	-	-	-	--	--	--	--	--	--	--	--	--	--	--	--	--	--	--	--	--	--	--
Unigene0000842	222	8	0.5328	gi|226494730|ref|NP_001147902.1|	71.2	1e-13	ternary complex factor MIP1 [Zea mays]	--	--	--	--	--	--	--	--	--	--	--	--	--	--	--	-	-	-	7	69	Lzipper-MIP1	Family	61	7.6e-17	--	--	--	--	--	--	--	--	--	--	--	--	--
Unigene0000843	315	14	0.6572	--	--	--	--	--	--	--	--	--	--	--	--	--	--	--	--	--	--	--	-	-	-	--	--	--	--	--	--	--	--	--	--	--	--	--	--	--	--	--	--	--
Unigene0000844	631	42	0.9842	gi|38344623|emb|CAE02522.2|	75.5	2e-13	OSJNBb0003A12.9 [Oryza sativa Japonica Group]	--	--	--	--	At2g25550	61.6	1e-10	KOG1075	FOG: Reverse transcriptase	--	--	--	--	--	--	-	GO:0005488//binding	-	1|29|80	79|43|128	DUF4283|zf-CCHC_4|zf-CCHC_4	Domain|Domain|Domain	42.2|6.3|40.6	3.6e-11|6.6|1.3e-10	--	--	--	--	--	--	--	--	--	--	--	--	--
Unigene0000845	224	6	0.3961	gi|32396104|gb|AAP43919.1|	117	1e-30	integrase [Gossypium hirsutum]	--	--	--	--	At1g35647	113	2e-29	KOG0017	FOG: Transposon-encoded proteins with TYA, reverse transcriptase, integrase domains in various combinations	--	--	--	--	--	--	GO:0046483//heterocycle metabolic process;GO:0006725//cellular aromatic compound metabolic process;GO:0006259//DNA metabolic process;GO:0006139//nucleobase-containing compound metabolic process;GO:1901360//organic cyclic compound metabolic process;GO:0044238//primary metabolic process;GO:0071704//organic substance metabolic process;GO:0044260//cellular macromolecule metabolic process;GO:0008152//…	GO:0046872//metal ion binding;GO:0046914//transition metal ion binding;GO:0005488//binding;GO:0097159//organic cyclic compound binding;GO:0043167//ion binding;GO:0043169//cation binding	-	--	--	--	--	--	--	--	--	--	--	--	--	--	--	--	--	--	--	--
Unigene0000846	255	13	0.7538	--	--	--	--	--	--	--	--	--	--	--	--	--	--	--	--	--	--	--	-	-	-	--	--	--	--	--	--	--	--	--	--	--	--	--	--	--	--	--	--	--
Unigene0000847	211	7	0.4905	gi|702270789|ref|XP_010043394.1|	110	1e-28	PREDICTED: gamma-interferon-inducible lysosomal thiol reductase-like isoform X1 [Eucalyptus grandis]	sp|O17861|YVRI_CAEEL	70.1	9e-15	GILT-like protein F37H8.5 OS=Caenorhabditis elegans GN=F37H8.5 PE=1 SV=1	At5g01580	93.6	3e-24	KOG3160	Gamma-interferon inducible lysosomal thiol reductase	K08059//interferon, gamma-inducible protein 30	4e-29	110	egr:104432619	--	-	-	GO:0044464//cell part;GO:0043227//membrane-bounded organelle;GO:0043229//intracellular organelle;GO:0005623//cell;GO:0043231//intracellular membrane-bounded organelle;GO:0043226//organelle;GO:0044424//intracellular part;GO:0005622//intracellular	2	70	GILT	Family	79	2e-22	--	--	--	--	--	--	--	--	--	--	--	--	--
Unigene0000848	378	23	0.8997	gi|297725905|ref|NP_001175316.1|	64.3	2e-10	Os07g0649700 [Oryza sativa Japonica Group]	--	--	--	--	At3g32110	53.1	3e-08	KOG1075	FOG: Reverse transcriptase	--	--	--	--	--	--	-	-	-	28	101	zf-RVT	Domain	59.1	3.6e-16	--	--	--	--	--	--	--	--	--	--	--	--	--
Unigene0000849	214	34	2.3493	gi|15239293|ref|NP_196214.1|	76.6	1e-16	protein maternal effect embryo arrest 60 [Arabidopsis thaliana]	--	--	--	--	--	--	--	--	--	--	--	--	--	--	--	GO:1901576//organic substance biosynthetic process;GO:0008152//metabolic process;GO:0044699//single-organism process;GO:0006796//phosphate-containing compound metabolic process;GO:0045017//glycerolipid biosynthetic process;GO:0046474//glycerophospholipid biosynthetic process;GO:0044238//primary metabolic process;GO:0006629//lipid metabolic process;GO:0019637//organophosphate metabolic process;GO:…	-	-	--	--	--	--	--	--	--	--	--	--	--	--	--	--	--	--	--	--	--
Unigene0000850	468	15	0.4739	gi|590588758|ref|XP_007016282.1|	127	3e-34	Maternal effect embryo arrest 60 [Theobroma cacao]	--	--	--	--	--	--	--	--	--	--	--	--	--	--	--	GO:0032502//developmental process;GO:0046474//glycerophospholipid biosynthetic process;GO:0009058//biosynthetic process;GO:0044763//single-organism cellular process;GO:0044238//primary metabolic process;GO:0006796//phosphate-containing compound metabolic process;GO:0008152//metabolic process;GO:0044699//single-organism process;GO:0022414//reproductive process;GO:0009987//cellular process;GO:00442…	-	-	--	--	--	--	--	--	--	--	--	--	--	--	--	--	--	--	--	--	--
Unigene0000851	517	6	0.1716	gi|590588758|ref|XP_007016282.1|	109	2e-27	Maternal effect embryo arrest 60 [Theobroma cacao]	--	--	--	--	--	--	--	--	--	--	--	--	--	--	--	GO:0044710//single-organism metabolic process;GO:0045017//glycerolipid biosynthetic process;GO:0006793//phosphorus metabolic process;GO:0032502//developmental process;GO:0046486//glycerolipid metabolic process;GO:1901576//organic substance biosynthetic process;GO:0006644//phospholipid metabolic process;GO:0044255//cellular lipid metabolic process;GO:0044699//single-organism process;GO:0046474//gl…	-	-	--	--	--	--	--	--	--	--	--	--	--	--	--	--	--	--	--	--	--
Unigene0000852	207	11	0.7858	--	--	--	--	--	--	--	--	--	--	--	--	--	--	--	--	--	--	--	-	-	-	--	--	--	--	--	--	--	--	--	--	--	--	--	--	--	--	--	--	--
Unigene0000853	231	20	1.2802	--	--	--	--	--	--	--	--	--	--	--	--	--	--	--	--	--	--	--	-	-	-	--	--	--	--	--	--	--	--	--	--	--	--	--	--	--	--	--	--	--
Unigene0000854	242	9	0.5499	--	--	--	--	--	--	--	--	--	--	--	--	--	--	--	--	--	--	--	-	-	-	--	--	--	--	--	--	--	--	--	--	--	--	--	--	--	--	--	--	--
Unigene0000855	214	10	0.691	--	--	--	--	--	--	--	--	--	--	--	--	--	--	--	--	--	--	--	-	-	-	--	--	--	--	--	--	--	--	--	--	--	--	--	--	--	--	--	--	--
Unigene0000856	336	31	1.3642	gi|659066981|ref|XP_008437047.1|	47.8	8e-06	PREDICTED: GEM-like protein 4 isoform X4 [Cucumis melo]	--	--	--	--	--	--	--	--	--	--	--	--	--	--	--	-	-	-	--	--	--	--	--	--	--	--	--	--	--	--	--	--	--	--	--	--	--
Unigene0000857	231	11	0.7041	--	--	--	--	--	--	--	--	--	--	--	--	--	--	--	--	--	--	--	-	-	-	--	--	--	--	--	--	--	--	--	--	--	--	--	--	--	--	--	--	--
Unigene0000858	238	7	0.4349	--	--	--	--	--	--	--	--	--	--	--	--	--	--	--	--	--	--	--	-	-	-	--	--	--	--	--	--	--	--	--	--	--	--	--	--	--	--	--	--	--
Unigene0000859	219	10	0.6752	gi|87248019|gb|ABD36062.1|	145	1e-42	cytochrome c biogenesis C (mitochondrion) [Beta vulgaris subsp. vulgaris]	sp|P30962|CCMC_BRADU	60.1	4e-11	Heme exporter protein C OS=Bradyrhizobium diazoefficiens (strain JCM 10833 / IAM 13628 / NBRC 14792 / USDA 110) GN=cycZ PE=3 SV=1	--	--	--	--	--	--	--	--	--	--	--	GO:0051179//localization;GO:0006461//protein complex assembly;GO:0070271//protein complex biogenesis;GO:0034622//cellular macromolecular complex assembly;GO:0051181//cofactor transport;GO:0044699//single-organism process;GO:0022607//cellular component assembly;GO:0071840//cellular component organization or biogenesis;GO:1902578//single-organism localization;GO:0065003//macromolecular complex asse…	GO:0005215//transporter activity;GO:0046906//tetrapyrrole binding;GO:0051184//cofactor transporter activity;GO:0005488//binding;GO:1901363//heterocyclic compound binding;GO:0097159//organic cyclic compound binding	GO:0005622//intracellular;GO:0043227//membrane-bounded organelle;GO:0044424//intracellular part;GO:0005623//cell;GO:0043229//intracellular organelle;GO:0043226//organelle;GO:0043231//intracellular membrane-bounded organelle;GO:0044464//cell part	--	--	--	--	--	--	--	--	--	--	--	--	--	--	--	--	--	--	--
Unigene0000860	2019	5455	39.9508	gi|449443363|ref|XP_004139447.1|	750	0	PREDICTED: double-stranded RNA-binding protein 2 [Cucumis sativus]	sp|Q9SKN2|DRB2_ARATH	469	1e-157	Double-stranded RNA-binding protein 2 OS=Arabidopsis thaliana GN=DRB2 PE=1 SV=1	--	--	--	--	--	--	--	--	--	--	--	GO:0035194//posttranscriptional gene silencing by RNA;GO:0031047//gene silencing by RNA;GO:0006725//cellular aromatic compound metabolic process;GO:1901698//response to nitrogen compound;GO:0050789//regulation of biological process;GO:0071310//cellular response to organic substance;GO:0044699//single-organism process;GO:0016458//gene silencing;GO:0050896//response to stimulus;GO:0031050//dsRNA fr…	GO:0003723//RNA binding;GO:0097159//organic cyclic compound binding;GO:0005488//binding;GO:0003676//nucleic acid binding;GO:1901363//heterocyclic compound binding	GO:0044464//cell part;GO:0005623//cell;GO:0005622//intracellular;GO:0044424//intracellular part	2|88	68|153	dsrm|dsrm	Domain|Domain	56.7|47.0	2.4e-15|2.5e-12	2|88	69|154	DSRM|DSRM	4.1e-44|4.1e-44	147.6|147.6	--	--	--	--	--	--	--	--
Unigene0000861	319	17	0.788	--	--	--	--	--	--	--	--	--	--	--	--	--	--	--	--	--	--	--	-	-	-	--	--	--	--	--	--	--	--	--	--	--	--	--	--	--	--	--	--	--
Unigene0000862	499	63	1.8668	--	--	--	--	--	--	--	--	--	--	--	--	--	--	--	--	--	--	--	-	-	-	--	--	--	--	--	--	--	--	--	--	--	--	--	--	--	--	--	--	--
Unigene0000863	236	10	0.6265	--	--	--	--	--	--	--	--	--	--	--	--	--	--	--	--	--	--	--	-	-	-	--	--	--	--	--	--	--	--	--	--	--	--	--	--	--	--	--	--	--
Unigene0000864	448	31	1.0232	gi|124359209|gb|ABN05720.1|	107	5e-26	RNA-directed DNA polymerase (Reverse transcriptase) [Medicago truncatula]	sp|P92555|M1250_ARATH	57.8	5e-10	Uncharacterized mitochondrial protein AtMg01250 OS=Arabidopsis thaliana GN=AtMg01250 PE=4 SV=1	At4g10830	97.1	8e-23	KOG1075	FOG: Reverse transcriptase	K18577//mannosylglycoprotein endo-beta-mannosidase [EC:3.2.1.152]	4e-37	142	mdm:103414113	--	GO:0008152//metabolic process;GO:0043170//macromolecule metabolic process;GO:0044763//single-organism cellular process;GO:0071704//organic substance metabolic process;GO:0044237//cellular metabolic process;GO:0044699//single-organism process;GO:0009987//cellular process;GO:0044238//primary metabolic process	GO:0097159//organic cyclic compound binding;GO:0003824//catalytic activity;GO:1901363//heterocyclic compound binding;GO:0016787//hydrolase activity;GO:0005488//binding	GO:0044430//cytoskeletal part;GO:0044422//organelle part;GO:0043226//organelle;GO:0032991//macromolecular complex;GO:0043229//intracellular organelle;GO:0044446//intracellular organelle part;GO:0044424//intracellular part;GO:0005622//intracellular;GO:0043232//intracellular non-membrane-bounded organelle;GO:0043234//protein complex;GO:0005623//cell;GO:0043228//non-membrane-bounded organelle;GO:000…	2	121	RVT_1	Family	70.9	8.3e-20	--	--	--	--	--	--	--	--	--	--	--	--	--
Unigene0000865	205	10	0.7213	gi|150036245|gb|ABR67408.1|	76.6	5e-16	reverse transcriptase [Cucumis melo subsp. melo]	--	--	--	--	At2g31080	59.7	4e-11	KOG1075	FOG: Reverse transcriptase	--	--	--	--	--	--	-	GO:0005488//binding	-	3	62	RVT_1	Family	25.1	8.4e-06	--	--	--	--	--	--	--	--	--	--	--	--	--
Unigene0000866	218	8	0.5426	gi|659120095|ref|XP_008460010.1|	70.9	2e-14	PREDICTED: serine/threonine-protein kinase pakD isoform X1 [Cucumis melo]	--	--	--	--	--	--	--	--	--	--	--	--	--	--	--	-	-	-	--	--	--	--	--	--	--	--	--	--	--	--	--	--	--	--	--	--	--
Unigene0000867	233	14	0.8885	--	--	--	--	--	--	--	--	--	--	--	--	--	--	--	--	--	--	--	-	-	-	--	--	--	--	--	--	--	--	--	--	--	--	--	--	--	--	--	--	--
Unigene0000868	278	21	1.117	--	--	--	--	--	--	--	--	--	--	--	--	--	--	--	--	--	--	--	-	-	-	--	--	--	--	--	--	--	--	--	--	--	--	--	--	--	--	--	--	--
Unigene0000869	221	7	0.4684	--	--	--	--	--	--	--	--	--	--	--	--	--	--	--	--	--	--	--	-	-	-	--	--	--	--	--	--	--	--	--	--	--	--	--	--	--	--	--	--	--
Unigene0000870	242	14	0.8554	--	--	--	--	--	--	--	--	--	--	--	--	--	--	--	--	--	--	--	-	-	-	--	--	--	--	--	--	--	--	--	--	--	--	--	--	--	--	--	--	--
Unigene0000871	237	18	1.123	--	--	--	--	--	--	--	--	--	--	--	--	--	--	--	--	--	--	--	-	-	-	--	--	--	--	--	--	--	--	--	--	--	--	--	--	--	--	--	--	--
Unigene0000872	708	40	0.8354	--	--	--	--	--	--	--	--	--	--	--	--	--	--	--	--	--	--	--	-	-	-	--	--	--	--	--	--	--	--	--	--	--	--	--	--	--	--	--	--	--
Unigene0000873	400	27	0.9981	--	--	--	--	--	--	--	--	--	--	--	--	--	--	--	--	--	--	--	-	-	-	--	--	--	--	--	--	--	--	--	--	--	--	--	--	--	--	--	--	--
Unigene0000874	653	47	1.0643	--	--	--	--	--	--	--	--	--	--	--	--	--	--	--	--	--	--	--	-	-	-	--	--	--	--	--	--	--	--	--	--	--	--	--	--	--	--	--	--	--
Unigene0000875	1117	44888	594.216	gi|659102348|ref|XP_008452081.1|	436	8e-150	PREDICTED: polygalacturonase inhibitor-like [Cucumis melo]	sp|Q05091|PGIP_PYRCO	400	1e-136	Polygalacturonase inhibitor OS=Pyrus communis GN=PGIP PE=1 SV=1	At3g12610	173	5e-49	KOG0619	FOG: Leucine rich repeat	--	--	--	--	--	--	-	-	GO:0005576//extracellular region	10|102|178	46|161|196	LRRNT_2|LRR_8|LRR_1	Family|Repeat|Repeat	46.4|29.2|13.3	2.5e-12|5.2e-07|0.057	--	--	--	--	--	--	PRGWK00000221	MELO3C016384	Contributed_R-Genes	Cucumis melo	RLP	2e-152	436
Unigene0000876	288	17	0.8728	gi|703104374|ref|XP_010097994.1|	83.2	5e-18	GDT1-like protein 2 [Morus notabilis]	--	--	--	--	At2g05610	63.2	5e-12	KOG0017	FOG: Transposon-encoded proteins with TYA, reverse transcriptase, integrase domains in various combinations	--	--	--	--	--	--	GO:1901362//organic cyclic compound biosynthetic process;GO:0097659//nucleic acid-templated transcription;GO:0009058//biosynthetic process;GO:0010467//gene expression;GO:0009059//macromolecule biosynthetic process;GO:0034641//cellular nitrogen compound metabolic process;GO:0006725//cellular aromatic compound metabolic process;GO:0019438//aromatic compound biosynthetic process;GO:0006807//nitrogen…	GO:0016787//hydrolase activity;GO:0008233//peptidase activity;GO:0004175//endopeptidase activity;GO:0003824//catalytic activity;GO:0005488//binding;GO:0070011//peptidase activity, acting on L-amino acid peptides;GO:1901363//heterocyclic compound binding;GO:0097159//organic cyclic compound binding	GO:0043227//membrane-bounded organelle;GO:0043226//organelle;GO:0005623//cell;GO:0044424//intracellular part;GO:0005622//intracellular;GO:0044464//cell part;GO:0043231//intracellular membrane-bounded organelle;GO:0043229//intracellular organelle	--	--	--	--	--	--	--	--	--	--	--	--	--	--	--	--	--	--	--
Unigene0000877	306	13	0.6282	--	--	--	--	--	--	--	--	--	--	--	--	--	--	--	--	--	--	--	-	-	-	--	--	--	--	--	--	--	--	--	--	--	--	--	--	--	--	--	--	--
Unigene0000878	541	210	5.7397	gi|743940219|ref|XP_011014575.1|	147	3e-42	PREDICTED: myb-like protein H isoform X1 [Populus euphratica]	--	--	--	--	--	--	--	--	--	--	--	--	--	--	--	-	-	-	--	--	--	--	--	--	--	--	--	--	--	--	--	--	--	--	--	--	--
Unigene0000879	654	4368	98.758	gi|32395571|gb|AAP37967.1|	94.7	3e-22	seed specific protein Bn15D1B [Brassica napus]	--	--	--	--	--	--	--	--	--	--	--	--	--	--	--	-	-	-	--	--	--	--	--	--	--	--	--	--	--	--	--	--	--	--	--	--	--
Unigene0000880	226	16	1.0468	--	--	--	--	--	--	--	--	--	--	--	--	--	--	--	--	--	--	--	-	-	-	--	--	--	--	--	--	--	--	--	--	--	--	--	--	--	--	--	--	--
Unigene0000881	376	0	0	gi|449446460|ref|XP_004140989.1|	214	5e-66	PREDICTED: hippocampus abundant transcript-like protein 1 [Cucumis sativus]	--	--	--	--	At5g42210	53.9	2e-09	KOG2816	Predicted transporter ADD1 (major facilitator superfamily)	--	--	--	--	--	--	GO:0044763//single-organism cellular process;GO:0009987//cellular process;GO:0044699//single-organism process	GO:0005488//binding;GO:0036094//small molecule binding;GO:0097159//organic cyclic compound binding	GO:0016020//membrane;GO:0031224//intrinsic component of membrane;GO:0044425//membrane part	--	--	--	--	--	--	--	--	--	--	--	--	--	--	--	--	--	--	--
Unigene0000882	372	0	0	gi|449446460|ref|XP_004140989.1|	140	5e-48	PREDICTED: hippocampus abundant transcript-like protein 1 [Cucumis sativus]	--	--	--	--	At5g42210	48.5	2e-07	KOG2816	Predicted transporter ADD1 (major facilitator superfamily)	--	--	--	--	--	--	GO:0044763//single-organism cellular process;GO:0009987//cellular process;GO:0044699//single-organism process	GO:0097159//organic cyclic compound binding;GO:0005488//binding;GO:0036094//small molecule binding	GO:0016020//membrane;GO:0031224//intrinsic component of membrane;GO:0044425//membrane part	--	--	--	--	--	--	--	--	--	--	--	--	--	--	--	--	--	--	--
Unigene0000883	899	1018	16.7439	gi|728836137|gb|KHG15580.1|	212	1e-65	Dynein beta chain, ciliary [Gossypium arboreum]	--	--	--	--	--	--	--	--	--	--	--	--	--	--	--	-	-	-	--	--	--	--	--	--	--	--	--	--	--	--	--	--	--	--	--	--	--
Unigene0000884	281	16	0.8419	--	--	--	--	--	--	--	--	--	--	--	--	--	--	--	--	--	--	--	-	-	-	--	--	--	--	--	--	--	--	--	--	--	--	--	--	--	--	--	--	--
Unigene0000885	326	8	0.3629	gi|703098682|ref|XP_010096450.1|	164	4e-46	Death-associated protein kinase 1 [Morus notabilis]	--	--	--	--	At3g18670	89.4	5e-21	KOG0504	FOG: Ankyrin repeat	--	--	--	--	--	--	GO:0008152//metabolic process;GO:0006796//phosphate-containing compound metabolic process;GO:0044237//cellular metabolic process;GO:0009987//cellular process;GO:0006793//phosphorus metabolic process	GO:0016772//transferase activity, transferring phosphorus-containing groups;GO:0003824//catalytic activity;GO:0016740//transferase activity	-	62	105	PGG	Domain	43.4	1.9e-11	--	--	--	--	--	--	--	--	--	--	--	--	--
Unigene0000886	295	6	0.3007	gi|703098682|ref|XP_010096450.1|	117	4e-29	Death-associated protein kinase 1 [Morus notabilis]	--	--	--	--	At5g04730	69.3	1e-14	KOG0504	FOG: Ankyrin repeat	--	--	--	--	--	--	GO:0008152//metabolic process;GO:0006796//phosphate-containing compound metabolic process;GO:0044237//cellular metabolic process;GO:0006793//phosphorus metabolic process;GO:0009987//cellular process	GO:0016740//transferase activity;GO:0003824//catalytic activity;GO:0016772//transferase activity, transferring phosphorus-containing groups	-	39	82	PGG	Domain	44.2	1.1e-11	--	--	--	--	--	--	--	--	--	--	--	--	--
Unigene0000887	346	15	0.641	gi|449454598|ref|XP_004145041.1|	234	1e-72	PREDICTED: receptor-like cytosolic serine/threonine-protein kinase RBK2 [Cucumis sativus]	sp|Q8RXC8|RBK2_ARATH	194	4e-59	Receptor-like cytosolic serine/threonine-protein kinase RBK2 OS=Arabidopsis thaliana GN=RBK2 PE=1 SV=1	At5g18910	205	6e-64	KOG1187	Serine/threonine protein kinase	--	--	--	--	--	--	GO:0043412//macromolecule modification;GO:0044267//cellular protein metabolic process;GO:0006796//phosphate-containing compound metabolic process;GO:0044260//cellular macromolecule metabolic process;GO:0006793//phosphorus metabolic process;GO:0036211//protein modification process;GO:0044237//cellular metabolic process;GO:0071704//organic substance metabolic process;GO:0016310//phosphorylation;GO:…	GO:0003824//catalytic activity;GO:0032549//ribonucleoside binding;GO:0001883//purine nucleoside binding;GO:0097159//organic cyclic compound binding;GO:0016773//phosphotransferase activity, alcohol group as acceptor;GO:0016740//transferase activity;GO:0036094//small molecule binding;GO:1901363//heterocyclic compound binding;GO:0001882//nucleoside binding;GO:0016772//transferase activity, transferr…	GO:0005737//cytoplasm;GO:0005622//intracellular;GO:0044464//cell part;GO:0043231//intracellular membrane-bounded organelle;GO:0044444//cytoplasmic part;GO:0042579//microbody;GO:0043226//organelle;GO:0043229//intracellular organelle;GO:0005623//cell;GO:0044424//intracellular part;GO:0043227//membrane-bounded organelle	4	95	Pkinase	Domain	77.8	6.4e-22	3|3|53	114|38|83	S_TKc|TyrKc|TyrKc	1.4e-19|1.3e-14|1.3e-14	67.2|50.3|50.3	--	--	--	--	--	--	--	--
Unigene0000888	223	7	0.4642	--	--	--	--	--	--	--	--	--	--	--	--	--	--	--	--	--	--	--	-	-	-	--	--	--	--	--	--	--	--	--	--	--	--	--	--	--	--	--	--	--
Unigene0000889	452	34	1.1123	gi|659133089|ref|XP_008466548.1|	99	1e-22	PREDICTED: agglutinin-like [Cucumis melo]	sp|Q9SSM3|JAL19_ARATH	63.9	7e-12	Jacalin-related lectin 19 OS=Arabidopsis thaliana GN=JAL19 PE=2 SV=1	--	--	--	--	--	--	--	--	--	--	--	GO:0050789//regulation of biological process;GO:0065007//biological regulation;GO:0007154//cell communication;GO:0050896//response to stimulus;GO:0044700//single organism signaling;GO:0051716//cellular response to stimulus;GO:0008152//metabolic process;GO:0044763//single-organism cellular process;GO:0044710//single-organism metabolic process;GO:0009987//cellular process;GO:0044699//single-organis…	GO:0043167//ion binding;GO:0016668//oxidoreductase activity, acting on a sulfur group of donors, NAD(P) as acceptor;GO:0016667//oxidoreductase activity, acting on a sulfur group of donors;GO:0046914//transition metal ion binding;GO:0005488//binding;GO:0046872//metal ion binding;GO:0016491//oxidoreductase activity;GO:0043169//cation binding;GO:0003824//catalytic activity;GO:0016651//oxidoreductase…	-	31	101	Jacalin	Domain	35.6	6.7e-09	46	105	Jacalin	1.2e-11	41.8	--	--	--	--	--	--	--	--
Unigene0000890	286	18	0.9306	--	--	--	--	--	--	--	--	--	--	--	--	--	--	--	--	--	--	--	-	-	-	--	--	--	--	--	--	--	--	--	--	--	--	--	--	--	--	--	--	--
Unigene0000891	292	20	1.0128	--	--	--	--	--	--	--	--	--	--	--	--	--	--	--	--	--	--	--	-	-	-	--	--	--	--	--	--	--	--	--	--	--	--	--	--	--	--	--	--	--
Unigene0000892	603	103	2.5257	--	--	--	--	--	--	--	--	--	--	--	--	--	--	--	--	--	--	--	-	-	-	--	--	--	--	--	--	--	--	--	--	--	--	--	--	--	--	--	--	--
Unigene0000893	284	13	0.6769	gi|659094341|ref|XP_008448008.1|	50.4	3e-06	PREDICTED: retrovirus-related Pol polyprotein from transposon TNT 1-94 isoform X3 [Cucumis melo]	--	--	--	--	--	--	--	--	--	--	--	--	--	--	--	-	-	-	--	--	--	--	--	--	--	--	--	--	--	--	--	--	--	--	--	--	--
Unigene0000894	209	29	2.0517	--	--	--	--	--	--	--	--	--	--	--	--	--	--	--	--	--	--	--	-	-	-	--	--	--	--	--	--	--	--	--	--	--	--	--	--	--	--	--	--	--
Unigene0000895	827	181	3.2362	gi|33465891|gb|AAQ19327.1|	75.1	4e-18	bZIP-like protein [Oryza sativa Japonica Group]	--	--	--	--	At2g16680	75.1	1e-14	KOG1075	FOG: Reverse transcriptase	--	--	--	--	--	--	-	GO:0005488//binding	GO:0044424//intracellular part;GO:0005622//intracellular;GO:0005623//cell;GO:0044464//cell part	3	98	zf-RVT	Domain	53.3	2.2e-14	--	--	--	--	--	--	--	--	--	--	--	--	--
Unigene0000896	251	11	0.648	--	--	--	--	--	--	--	--	--	--	--	--	--	--	--	--	--	--	--	-	-	-	--	--	--	--	--	--	--	--	--	--	--	--	--	--	--	--	--	--	--
Unigene0000897	243	11	0.6694	--	--	--	--	--	--	--	--	--	--	--	--	--	--	--	--	--	--	--	-	-	-	--	--	--	--	--	--	--	--	--	--	--	--	--	--	--	--	--	--	--
Unigene0000898	416	325	11.552	--	--	--	--	--	--	--	--	--	--	--	--	--	--	--	--	--	--	--	-	-	-	--	--	--	--	--	--	--	--	--	--	--	--	--	--	--	--	--	--	--
Unigene0000899	354	26	1.086	--	--	--	--	--	--	--	--	--	--	--	--	--	--	--	--	--	--	--	-	-	-	--	--	--	--	--	--	--	--	--	--	--	--	--	--	--	--	--	--	--
Unigene0000900	839	66	1.1632	gi|659085524|ref|XP_008443465.1|	484	4e-167	PREDICTED: protein NRT1/ PTR FAMILY 5.8-like [Cucumis melo]	sp|Q9LFR1|PTR50_ARATH	361	7e-120	Protein NRT1/ PTR FAMILY 5.8 OS=Arabidopsis thaliana GN=NPF5.8 PE=2 SV=1	At5g14940	361	1e-120	KOG1237	H+/oligopeptide symporter	K14638//solute carrier family 15 (peptide/histidine transporter), member 3/4	2e-161	468	csv:101207604	--	GO:0009605//response to external stimulus;GO:0051707//response to other organism;GO:0006810//transport;GO:0050896//response to stimulus;GO:0051704//multi-organism process;GO:1902578//single-organism localization;GO:0051234//establishment of localization;GO:0015833//peptide transport;GO:0044699//single-organism process;GO:0009607//response to biotic stimulus;GO:0051179//localization;GO:0071705//ni…	GO:0022892//substrate-specific transporter activity;GO:0015075//ion transmembrane transporter activity;GO:0046943//carboxylic acid transmembrane transporter activity;GO:0022891//substrate-specific transmembrane transporter activity;GO:0022857//transmembrane transporter activity;GO:0005342//organic acid transmembrane transporter activity;GO:0005215//transporter activity;GO:0008514//organic anion t…	GO:0016020//membrane	36	207	PTR2	Family	99.1	2e-28	--	--	--	--	--	--	PRGDB00215095	MDP0000319352	Putative_R-Genes,_predicted_from_Pythozome	Malus x domestica	TNL	8e-29	119
Unigene0000901	263	18	1.012	--	--	--	--	--	--	--	--	--	--	--	--	--	--	--	--	--	--	--	-	-	-	--	--	--	--	--	--	--	--	--	--	--	--	--	--	--	--	--	--	--
Unigene0000902	334	18	0.7969	--	--	--	--	--	--	--	--	--	--	--	--	--	--	--	--	--	--	--	-	-	-	--	--	--	--	--	--	--	--	--	--	--	--	--	--	--	--	--	--	--
Unigene0000903	418	24	0.849	gi|28558781|gb|AAO45752.1|	185	4e-57	pol protein [Cucumis melo subsp. melo]	sp|Q7LHG5|YI31B_YEAST	48.5	5e-08	Transposon Ty3-I Gag-Pol polyprotein OS=Saccharomyces cerevisiae (strain ATCC 204508 / S288c) GN=TY3B-I PE=3 SV=2	At3g31970	132	6e-38	KOG0017	FOG: Transposon-encoded proteins with TYA, reverse transcriptase, integrase domains in various combinations	--	--	--	--	--	--	GO:0006139//nucleobase-containing compound metabolic process;GO:0046483//heterocycle metabolic process;GO:0090304//nucleic acid metabolic process;GO:0008152//metabolic process;GO:0006807//nitrogen compound metabolic process;GO:0044260//cellular macromolecule metabolic process;GO:1901360//organic cyclic compound metabolic process;GO:0006259//DNA metabolic process;GO:0071704//organic substance meta…	GO:0043169//cation binding;GO:0043167//ion binding;GO:0005488//binding;GO:0046914//transition metal ion binding;GO:0097159//organic cyclic compound binding;GO:0046872//metal ion binding	-	--	--	--	--	--	--	--	--	--	--	--	--	--	--	--	--	--	--	--
Unigene0000904	240	21	1.2938	--	--	--	--	--	--	--	--	--	--	--	--	--	--	--	--	--	--	--	-	-	-	--	--	--	--	--	--	--	--	--	--	--	--	--	--	--	--	--	--	--
Unigene0000905	360	26	1.0679	--	--	--	--	--	--	--	--	--	--	--	--	--	--	--	--	--	--	--	-	-	-	--	--	--	--	--	--	--	--	--	--	--	--	--	--	--	--	--	--	--
Unigene0000906	281	44	2.3153	--	--	--	--	--	--	--	--	--	--	--	--	--	--	--	--	--	--	--	-	-	-	--	--	--	--	--	--	--	--	--	--	--	--	--	--	--	--	--	--	--
Unigene0000907	360	68	2.793	gi|778669591|ref|XP_011649272.1|	166	2e-51	PREDICTED: auxin-induced protein 15A-like [Cucumis sativus]	sp|Q9FJG0|SAU20_ARATH	112	3e-31	Auxin-responsive protein SAUR20 OS=Arabidopsis thaliana GN=SAUR20 PE=2 SV=1	--	--	--	--	--	K14488//SAUR family protein	8e-52	166	csv:101203413	ko04075//Plant hormone signal transduction//Signal transduction//Environmental Information Processing	-	-	-	11	90	Auxin_inducible	Family	104.3	2.6e-30	--	--	--	--	--	--	--	--	--	--	--	--	--
Unigene0000908	306	20	0.9664	--	--	--	--	--	--	--	--	--	--	--	--	--	--	--	--	--	--	--	-	-	-	--	--	--	--	--	--	--	--	--	--	--	--	--	--	--	--	--	--	--
Unigene0000909	270	23	1.2596	--	--	--	--	--	--	--	--	--	--	--	--	--	--	--	--	--	--	--	-	-	-	--	--	--	--	--	--	--	--	--	--	--	--	--	--	--	--	--	--	--
Unigene0000910	1159	0	0	gi|502133068|ref|XP_004501640.1|	77.8	3e-14	PREDICTED: dnaJ protein P58IPK homolog [Cicer arietinum]	--	--	--	--	At5g64360	73.9	7e-14	KOG0714	Molecular chaperone (DnaJ superfamily)	--	--	--	--	--	--	-	-	-	--	--	--	--	--	--	--	--	--	--	--	--	--	--	--	--	--	--	--
Unigene0000911	1555	46	0.4374	gi|703142127|ref|XP_010107680.1|	79.7	3e-14	Protein HLJ1 [Morus notabilis]	--	--	--	--	At5g64360	75.5	6e-14	KOG0714	Molecular chaperone (DnaJ superfamily)	--	--	--	--	--	--	-	-	-	--	--	--	--	--	--	--	--	--	--	--	--	--	--	--	--	--	--	--
Unigene0000912	397	0	0	--	--	--	--	--	--	--	--	--	--	--	--	--	--	--	--	--	--	--	-	-	-	--	--	--	--	--	--	--	--	--	--	--	--	--	--	--	--	--	--	--
Unigene0000913	398	0	0	--	--	--	--	--	--	--	--	--	--	--	--	--	--	--	--	--	--	--	-	-	-	--	--	--	--	--	--	--	--	--	--	--	--	--	--	--	--	--	--	--
Unigene0000914	215	24	1.6506	--	--	--	--	--	--	--	--	--	--	--	--	--	--	--	--	--	--	--	-	-	-	--	--	--	--	--	--	--	--	--	--	--	--	--	--	--	--	--	--	--
Unigene0000915	237	14	0.8735	--	--	--	--	--	--	--	--	--	--	--	--	--	--	--	--	--	--	--	-	-	-	--	--	--	--	--	--	--	--	--	--	--	--	--	--	--	--	--	--	--
Unigene0000916	523	0	0	gi|659118799|ref|XP_008459312.1|	181	2e-56	PREDICTED: mini zinc finger protein 2 [Cucumis melo]	sp|Q9LJW5|MIF2_ARATH	133	2e-38	Mini zinc finger protein 2 OS=Arabidopsis thaliana GN=MIF2 PE=1 SV=1	--	--	--	--	--	--	--	--	--	--	--	-	GO:1901363//heterocyclic compound binding;GO:0003676//nucleic acid binding;GO:0005488//binding;GO:0097159//organic cyclic compound binding	-	26	81	ZF-HD_dimer	Family	103.6	3.7e-30	--	--	--	--	--	ZF-HD	--	--	--	--	--	--	--
Unigene0000917	638	84	1.9468	gi|659118799|ref|XP_008459312.1|	181	8e-56	PREDICTED: mini zinc finger protein 2 [Cucumis melo]	sp|Q9LJW5|MIF2_ARATH	133	5e-38	Mini zinc finger protein 2 OS=Arabidopsis thaliana GN=MIF2 PE=1 SV=1	--	--	--	--	--	--	--	--	--	--	--	-	GO:0003676//nucleic acid binding;GO:0097159//organic cyclic compound binding;GO:0005488//binding;GO:1901363//heterocyclic compound binding	-	26	81	ZF-HD_dimer	Family	103.6	3.7e-30	--	--	--	--	--	ZF-HD	--	--	--	--	--	--	--
Unigene0000918	268	14	0.7724	gi|659080234|ref|XP_008440682.1|	159	2e-44	PREDICTED: probable glycerophosphoryl diester phosphodiesterase 2 [Cucumis melo]	sp|Q9FGT9|GPDL6_ARATH	105	7e-26	Glycerophosphodiester phosphodiesterase GDPDL6 OS=Arabidopsis thaliana GN=GDPDL6 PE=2 SV=1	At5g58170	105	1e-26	KOG2258	Glycerophosphoryl diester phosphodiesterase	--	--	--	--	--	--	GO:0044262//cellular carbohydrate metabolic process;GO:0071704//organic substance metabolic process;GO:0006066//alcohol metabolic process;GO:0044281//small molecule metabolic process;GO:1901615//organic hydroxy compound metabolic process;GO:0044699//single-organism process;GO:0044763//single-organism cellular process;GO:0019751//polyol metabolic process;GO:0008152//metabolic process;GO:0005975//c…	GO:0016787//hydrolase activity;GO:0008081//phosphoric diester hydrolase activity;GO:0042578//phosphoric ester hydrolase activity;GO:0003824//catalytic activity;GO:0016788//hydrolase activity, acting on ester bonds	-	--	--	--	--	--	--	--	--	--	--	--	--	--	--	--	--	--	--	--
Unigene0000919	399	36	1.3341	--	--	--	--	--	--	--	--	--	--	--	--	--	--	--	--	--	--	--	-	-	-	--	--	--	--	--	--	--	--	--	--	--	--	--	--	--	--	--	--	--
Unigene0000920	265	16	0.8928	--	--	--	--	--	--	--	--	--	--	--	--	--	--	--	--	--	--	--	-	-	-	--	--	--	--	--	--	--	--	--	--	--	--	--	--	--	--	--	--	--
Unigene0000921	209	9	0.6367	--	--	--	--	--	--	--	--	--	--	--	--	--	--	--	--	--	--	--	-	-	-	--	--	--	--	--	--	--	--	--	--	--	--	--	--	--	--	--	--	--
Unigene0000922	299	1	0.0495	--	--	--	--	--	--	--	--	--	--	--	--	--	--	--	--	--	--	--	-	-	-	--	--	--	--	--	--	--	--	--	--	--	--	--	--	--	--	--	--	--
Unigene0000923	349	33	1.3982	--	--	--	--	--	--	--	--	--	--	--	--	--	--	--	--	--	--	--	-	-	-	--	--	--	--	--	--	--	--	--	--	--	--	--	--	--	--	--	--	--
Unigene0000924	261	19	1.0764	--	--	--	--	--	--	--	--	--	--	--	--	--	--	--	--	--	--	--	-	-	-	--	--	--	--	--	--	--	--	--	--	--	--	--	--	--	--	--	--	--
Unigene0000925	235	17	1.0697	--	--	--	--	--	--	--	--	--	--	--	--	--	--	--	--	--	--	--	-	-	-	--	--	--	--	--	--	--	--	--	--	--	--	--	--	--	--	--	--	--
Unigene0000926	282	25	1.3109	gi|307135793|gb|ADN33672.1|	52.8	5e-07	hypothetical protein [Cucumis melo subsp. melo]	--	--	--	--	--	--	--	--	--	--	--	--	--	--	--	-	-	-	--	--	--	--	--	--	--	--	--	--	--	--	--	--	--	--	--	--	--
Unigene0000927	471	93	2.9196	gi|674932733|emb|CDY00537.1|	105	4e-26	BnaC04g23880D [Brassica napus]	--	--	--	--	--	--	--	--	--	--	--	--	--	--	--	-	-	-	110	137	DUF761	Family	30.9	1.1e-07	--	--	--	--	--	--	--	--	--	--	--	--	--
Unigene0000928	635	0	0	gi|449465902|ref|XP_004150666.1|	225	5e-73	PREDICTED: dolichyl-diphosphooligosaccharide--protein glycosyltransferase subunit DAD1 [Cucumis sativus]	sp|Q9M3T9|DAD1_BETPN	216	4e-70	Dolichyl-diphosphooligosaccharide--protein glycosyltransferase subunit DAD1 OS=Betula pendula GN=DAD1 PE=3 SV=1	At1g32210	214	4e-70	KOG1746	Defender against cell death protein/oligosaccharyltransferase, epsilon subunit	K12668//oligosaccharyltransferase complex subunit epsilon	2e-73	225	csv:101204006	ko04141//Protein processing in endoplasmic reticulum//Folding, sorting and degradation//Genetic Information Processing;ko00510//N-Glycan biosynthesis//Glycan biosynthesis and metabolism//Metabolism	GO:0050794//regulation of cellular process;GO:0043170//macromolecule metabolic process;GO:0006464//cellular protein modification process;GO:0009987//cellular process;GO:0036211//protein modification process;GO:0043412//macromolecule modification;GO:0019538//protein metabolic process;GO:0050789//regulation of biological process;GO:0065007//biological regulation;GO:0008152//metabolic process;GO:004…	GO:0003824//catalytic activity;GO:0016757//transferase activity, transferring glycosyl groups;GO:0016758//transferase activity, transferring hexosyl groups;GO:0016740//transferase activity;GO:0004576//oligosaccharyl transferase activity	GO:0044424//intracellular part;GO:0043231//intracellular membrane-bounded organelle;GO:0005622//intracellular;GO:0031224//intrinsic component of membrane;GO:0031090//organelle membrane;GO:0043229//intracellular organelle;GO:0016020//membrane;GO:0043226//organelle;GO:0005623//cell;GO:0044464//cell part;GO:0044422//organelle part;GO:0043227//membrane-bounded organelle;GO:0044425//membrane part	6	115	DAD	Family	142.7	4e-42	--	--	--	--	--	--	--	--	--	--	--	--	--
Unigene0000929	636	0	0	gi|449465902|ref|XP_004150666.1|	225	5e-73	PREDICTED: dolichyl-diphosphooligosaccharide--protein glycosyltransferase subunit DAD1 [Cucumis sativus]	sp|Q9M3T9|DAD1_BETPN	216	4e-70	Dolichyl-diphosphooligosaccharide--protein glycosyltransferase subunit DAD1 OS=Betula pendula GN=DAD1 PE=3 SV=1	At1g32210	214	4e-70	KOG1746	Defender against cell death protein/oligosaccharyltransferase, epsilon subunit	K12668//oligosaccharyltransferase complex subunit epsilon	2e-73	225	csv:101204006	ko04141//Protein processing in endoplasmic reticulum//Folding, sorting and degradation//Genetic Information Processing;ko00510//N-Glycan biosynthesis//Glycan biosynthesis and metabolism//Metabolism	GO:0043170//macromolecule metabolic process;GO:0050789//regulation of biological process;GO:0043412//macromolecule modification;GO:0044238//primary metabolic process;GO:0044267//cellular protein metabolic process;GO:0065007//biological regulation;GO:0071704//organic substance metabolic process;GO:0043067//regulation of programmed cell death;GO:0006464//cellular protein modification process;GO:000…	GO:0016740//transferase activity;GO:0004576//oligosaccharyl transferase activity;GO:0016757//transferase activity, transferring glycosyl groups;GO:0003824//catalytic activity;GO:0016758//transferase activity, transferring hexosyl groups	GO:0016020//membrane;GO:0043227//membrane-bounded organelle;GO:0031224//intrinsic component of membrane;GO:0005623//cell;GO:0044422//organelle part;GO:0044425//membrane part;GO:0043226//organelle;GO:0044424//intracellular part;GO:0005622//intracellular;GO:0043229//intracellular organelle;GO:0043231//intracellular membrane-bounded organelle;GO:0044464//cell part;GO:0031090//organelle membrane	6	115	DAD	Family	142.7	4e-42	--	--	--	--	--	--	--	--	--	--	--	--	--
Unigene0000930	1042	1110	15.7515	gi|778687488|ref|XP_011652571.1|	89.4	2e-17	PREDICTED: transport inhibitor response 1-like protein [Cucumis sativus]	sp|Q9LTX2|TIR1L_ARATH	52.8	3e-06	Transport inhibitor response 1-like protein OS=Arabidopsis thaliana GN=At5g49980 PE=2 SV=1	At5g49980	52.8	4e-07	KOG1947	Leucine rich repeat proteins, some proteins contain F-box	--	--	--	--	--	--	-	-	-	--	--	--	--	--	--	--	--	--	--	--	--	--	--	--	--	--	--	--
Unigene0000931	792	122	2.2777	gi|743939608|ref|XP_011014255.1|	387	2e-134	PREDICTED: DNA-directed RNA polymerases II and IV subunit 5A [Populus euphratica]	sp|O81098|RPB5A_ARATH	360	1e-124	DNA-directed RNA polymerases II and IV subunit 5A OS=Arabidopsis thaliana GN=NRPB5A PE=1 SV=1	At3g22320	360	2e-125	KOG3218	RNA polymerase, 25-kDa subunit (common to polymerases I, II and III)	K03013//DNA-directed RNA polymerases I, II, and III subunit RPABC1	5e-134	385	pop:POPTR_0006s16660g	ko00230//Purine metabolism//Nucleotide metabolism//Metabolism;ko00240//Pyrimidine metabolism//Nucleotide metabolism//Metabolism;ko03020//RNA polymerase//Transcription//Genetic Information Processing	GO:1901576//organic substance biosynthetic process;GO:0043170//macromolecule metabolic process;GO:0009059//macromolecule biosynthetic process;GO:0009058//biosynthetic process;GO:0034645//cellular macromolecule biosynthetic process;GO:0044249//cellular biosynthetic process;GO:0044260//cellular macromolecule metabolic process;GO:0071704//organic substance metabolic process;GO:0009987//cellular proc…	GO:0097159//organic cyclic compound binding;GO:1901363//heterocyclic compound binding;GO:0034062//RNA polymerase activity;GO:0016772//transferase activity, transferring phosphorus-containing groups;GO:0005488//binding;GO:0016740//transferase activity;GO:0016779//nucleotidyltransferase activity;GO:0003676//nucleic acid binding;GO:0003824//catalytic activity	GO:0044464//cell part;GO:0044424//intracellular part;GO:0043229//intracellular organelle;GO:0043227//membrane-bounded organelle;GO:0043231//intracellular membrane-bounded organelle;GO:0043226//organelle;GO:0005622//intracellular;GO:0005623//cell	4|133	91|206	RNA_pol_Rpb5_N|RNA_pol_Rpb5_C	Domain|Domain	102.6|128.7	1e-29|4e-38	--	--	--	--	--	--	PRGDB00182826	GSVIVT01000665001	Putative_R-Genes,_predicted_from_Pythozome	Vitis vinifera	NL	2e-30	120
Unigene0000932	238	16	0.9941	--	--	--	--	--	--	--	--	--	--	--	--	--	--	--	--	--	--	--	-	-	-	--	--	--	--	--	--	--	--	--	--	--	--	--	--	--	--	--	--	--
Unigene0000933	491	36	1.0841	--	--	--	--	--	--	--	--	--	--	--	--	--	--	--	--	--	--	--	-	-	-	--	--	--	--	--	--	--	--	--	--	--	--	--	--	--	--	--	--	--
Unigene0000934	510	2471	71.6424	gi|474365072|gb|EMS63411.1|	208	9e-67	Histone H4 [Triticum urartu]	sp|P0CG89|H4_SOYBN	202	1e-65	Histone H4 OS=Glycine max PE=3 SV=1	At5g59970	202	2e-66	KOG3467	Histone H4	K11254//histone H4	8e-67	211	sly:101252889	--	GO:0034728//nucleosome organization;GO:0071822//protein complex subunit organization;GO:0006950//response to stress;GO:0051276//chromosome organization;GO:0071840//cellular component organization or biogenesis;GO:0006325//chromatin organization;GO:0050896//response to stimulus;GO:0071824//protein-DNA complex subunit organization;GO:0006996//organelle organization;GO:0009987//cellular process;GO:0…	GO:0003676//nucleic acid binding;GO:1901363//heterocyclic compound binding;GO:0097159//organic cyclic compound binding;GO:0005515//protein binding;GO:0005488//binding;GO:0046983//protein dimerization activity	GO:0032991//macromolecular complex;GO:0009536//plastid;GO:0043232//intracellular non-membrane-bounded organelle;GO:0044446//intracellular organelle part;GO:0043229//intracellular organelle;GO:0005911//cell-cell junction;GO:0044424//intracellular part;GO:0043228//non-membrane-bounded organelle;GO:0031090//organelle membrane;GO:0005737//cytoplasm;GO:0044464//cell part;GO:0005622//intracellular;GO:0…	43	109	Histone	Domain	52.6	3.3e-14	31|49|74	53|105|108	H4|H4|TAF	3.7e-34|3.7e-34|3.7e-06	114.7|114.7|24.0	--	--	--	--	--	--	--	--
Unigene0000935	1208	221	2.7052	gi|778686049|ref|XP_011652321.1|	603	0	PREDICTED: photosynthetic NDH subunit of subcomplex B 2, chloroplastic [Cucumis sativus]	sp|Q94AQ8|PNSB2_ARATH	426	3e-146	Photosynthetic NDH subunit of subcomplex B 2, chloroplastic OS=Arabidopsis thaliana GN=PNSB2 PE=2 SV=1	--	--	--	--	--	--	--	--	--	--	--	GO:0044238//primary metabolic process;GO:0008152//metabolic process	GO:0005488//binding	-	--	--	--	--	--	--	--	--	--	--	--	--	--	--	--	--	--	--	--
Unigene0000936	295	13	0.6516	--	--	--	--	--	--	--	--	--	--	--	--	--	--	--	--	--	--	--	-	-	-	--	--	--	--	--	--	--	--	--	--	--	--	--	--	--	--	--	--	--
Unigene0000937	296	14	0.6994	gi|778666424|ref|XP_011648738.1|	185	1e-52	PREDICTED: myosin-11 isoform X2 [Cucumis sativus]	sp|F4HXP9|MYO9_ARATH	145	2e-39	Myosin-9 OS=Arabidopsis thaliana GN=XI-C PE=2 SV=1	At1g08730	145	2e-40	KOG0160	Myosin class V heavy chain	K10357//myosin V	4e-53	185	csv:101206606	--	GO:0050789//regulation of biological process;GO:0065007//biological regulation;GO:0050794//regulation of cellular process	GO:0017111//nucleoside-triphosphatase activity;GO:0016817//hydrolase activity, acting on acid anhydrides;GO:0005515//protein binding;GO:0016462//pyrophosphatase activity;GO:0097367//carbohydrate derivative binding;GO:1901363//heterocyclic compound binding;GO:0032550//purine ribonucleoside binding;GO:0016818//hydrolase activity, acting on acid anhydrides, in phosphorus-containing anhydrides;GO:001…	GO:0005622//intracellular;GO:0016020//membrane;GO:0043228//non-membrane-bounded organelle;GO:0044425//membrane part;GO:0031224//intrinsic component of membrane;GO:0044464//cell part;GO:0043226//organelle;GO:0005623//cell;GO:0005856//cytoskeleton;GO:0015629//actin cytoskeleton;GO:0044424//intracellular part;GO:0043232//intracellular non-membrane-bounded organelle;GO:0043229//intracellular organelle	3|50|75	21|70|93	IQ|IQ|IQ	Motif|Motif|Motif	23.1|22.6|16.9	3e-05|4.4e-05|0.003	1|48	22|70	IQ|IQ	1.7e-15|1.7e-15	53.8|53.8	--	--	--	--	--	--	--	--
Unigene0000938	1280	24	0.2772	gi|778682624|ref|XP_011651749.1|	399	2e-129	PREDICTED: nucleolin 1 isoform X1 [Cucumis sativus]	sp|Q7XTT4|NUCL2_ORYSJ	249	1e-73	Nucleolin 2 OS=Oryza sativa subsp. japonica GN=Os04g0620700 PE=2 SV=2	At3g18610	242	4e-72	KOG4210	Nuclear localization sequence binding protein	K11294//nucleolin	6e-130	399	csv:101206235	--	-	GO:0005488//binding;GO:0097159//organic cyclic compound binding;GO:0036094//small molecule binding	-	40|142	108|214	RRM_1|RRM_1	Domain|Domain	57.9|47.7	5e-16|7.7e-13	39|141	110|217	RRM|RRM	1.8e-38|1.8e-38	130.2|130.2	--	--	--	--	--	--	--	--
Unigene0000939	2655	21671	120.693	gi|778682624|ref|XP_011651749.1|	617	0	PREDICTED: nucleolin 1 isoform X1 [Cucumis sativus]	sp|Q7XTT4|NUCL2_ORYSJ	268	4e-76	Nucleolin 2 OS=Oryza sativa subsp. japonica GN=Os04g0620700 PE=2 SV=2	At3g18610	257	2e-73	KOG4210	Nuclear localization sequence binding protein	K11294//nucleolin	0	617	csv:101206235	--	-	GO:0036094//small molecule binding;GO:0097159//organic cyclic compound binding;GO:0005488//binding	-	482|584	550|656	RRM_1|RRM_1	Domain|Domain	56.2|46.0	1.8e-15|2.7e-12	481|583	552|659	RRM|RRM	2.9e-37|2.9e-37	126.2|126.2	--	--	--	--	--	--	--	--
Unigene0000940	362	33	1.3479	gi|778673440|ref|XP_011649992.1|	196	2e-57	PREDICTED: cellulose synthase-like protein B4 [Cucumis sativus]	sp|Q339N5|CSLH1_ORYSJ	97.8	7e-23	Cellulose synthase-like protein H1 OS=Oryza sativa subsp. japonica GN=CSLH1 PE=2 SV=2	--	--	--	--	--	--	--	--	--	--	--	GO:0071704//organic substance metabolic process;GO:0008152//metabolic process;GO:0044260//cellular macromolecule metabolic process;GO:0006073//cellular glucan metabolic process;GO:0044262//cellular carbohydrate metabolic process;GO:0005975//carbohydrate metabolic process;GO:0044264//cellular polysaccharide metabolic process;GO:0043170//macromolecule metabolic process;GO:0044237//cellular metaboli…	GO:0003824//catalytic activity;GO:0016758//transferase activity, transferring hexosyl groups;GO:0046527//glucosyltransferase activity;GO:0016759//cellulose synthase activity;GO:0016740//transferase activity;GO:0016757//transferase activity, transferring glycosyl groups	GO:0016020//membrane	1	117	Cellulose_synt	Family	37.8	6.3e-10	--	--	--	--	--	--	--	--	--	--	--	--	--
Unigene0000941	231	7	0.4481	--	--	--	--	--	--	--	--	--	--	--	--	--	--	--	--	--	--	--	-	-	-	--	--	--	--	--	--	--	--	--	--	--	--	--	--	--	--	--	--	--
Unigene0000942	236	9	0.5639	--	--	--	--	--	--	--	--	--	--	--	--	--	--	--	--	--	--	--	-	-	-	--	--	--	--	--	--	--	--	--	--	--	--	--	--	--	--	--	--	--
Unigene0000943	242	8	0.4888	--	--	--	--	--	--	--	--	--	--	--	--	--	--	--	--	--	--	--	-	-	-	--	--	--	--	--	--	--	--	--	--	--	--	--	--	--	--	--	--	--
Unigene0000944	251	11	0.648	gi|778700851|ref|XP_011654928.1|	145	2e-39	PREDICTED: rho-associated protein kinase 1 [Cucumis sativus]	--	--	--	--	--	--	--	--	--	--	--	--	--	--	--	-	-	-	--	--	--	--	--	--	--	--	--	--	--	--	--	--	--	--	--	--	--
Unigene0000945	261	19	1.0764	gi|659090064|ref|XP_008445818.1|	152	8e-42	PREDICTED: myosin-6 [Cucumis melo]	--	--	--	--	--	--	--	--	--	--	--	--	--	--	--	-	-	-	--	--	--	--	--	--	--	--	--	--	--	--	--	--	--	--	--	--	--
Unigene0000946	579	80	2.043	--	--	--	--	--	--	--	--	--	--	--	--	--	--	--	--	--	--	--	-	-	-	--	--	--	--	--	--	--	--	--	--	--	--	--	--	--	--	--	--	--
Unigene0000947	213	5	0.3471	--	--	--	--	--	--	--	--	--	--	--	--	--	--	--	--	--	--	--	-	-	-	--	--	--	--	--	--	--	--	--	--	--	--	--	--	--	--	--	--	--
Unigene0000948	206	14	1.0049	--	--	--	--	--	--	--	--	--	--	--	--	--	--	--	--	--	--	--	-	-	-	--	--	--	--	--	--	--	--	--	--	--	--	--	--	--	--	--	--	--
Unigene0000949	227	7	0.456	--	--	--	--	--	--	--	--	--	--	--	--	--	--	--	--	--	--	--	-	-	-	--	--	--	--	--	--	--	--	--	--	--	--	--	--	--	--	--	--	--
Unigene0000950	240	11	0.6777	--	--	--	--	--	--	--	--	--	--	--	--	--	--	--	--	--	--	--	-	-	-	--	--	--	--	--	--	--	--	--	--	--	--	--	--	--	--	--	--	--
Unigene0000951	223	14	0.9283	gi|703144885|ref|XP_010108394.1|	80.9	4e-17	Dihydrolipoyllysine-residue acetyltransferase component 3 of pyruvate dehydrogenase complex [Morus notabilis]	--	--	--	--	At3g30570	51.6	3e-08	KOG1075	FOG: Reverse transcriptase	--	--	--	--	--	--	-	GO:0003824//catalytic activity	-	--	--	--	--	--	--	--	--	--	--	--	--	--	--	--	--	--	--	--
Unigene0000952	318	21	0.9765	--	--	--	--	--	--	--	--	--	--	--	--	--	--	--	--	--	--	--	-	-	-	--	--	--	--	--	--	--	--	--	--	--	--	--	--	--	--	--	--	--
[truncated: 57,121 more rows]
