# Supplementary material for: De novo sequencing and analysis of the transcriptome during the browning of fresh-cut Luffa cylindrica 'Fusi-3' fruits
Source: PLoS One. 2017 Nov 16;12(11):e0187117. doi: 10.1371/journal.pone.0187117 (PMC5690621; doi:10.1371/journal.pone.0187117)
Supplement: S2 Table — (XLSX) [file pone.0187117.s002.xlsx]

## Sheet: Sheet1
KEGG_A_class	KEGG_B_class	Pathway	Count (6908)	Pathway ID	Genes	KOs
Genetic Information Processing	Translation	Ribosome	434	ko03010	Unigene0001143;Unigene0001156;Unigene0001230;Unigene0001505;Unigene0002053;Unigene0002054;Unigene0002179;Unigene0002362;Unigene0002672;Unigene0002683;Unigene0002934;Unigene0003181;Unigene0003279;Unigene0003358;Unigene0003464;Unigene0003551;Unigene0003799;Unigene0003800;Unigene0003866;Unigene0004089;Unigene0004109;Unigene0004354;Unigene0004377;Unigene0004378;Unigene0004845;Unigene0005267;Unigene00…	K02920+K02867+K02940+K02881+K02927+K02927+K02901+K02942+K02896+K02881+K02977+K02946+K02945+K02969+K02969+K02898+K02940+K02940+K02943+K02938+K02938+K02946+K02872+K02872+K02989+K02911+K02863+K02957+K02957+K02977+K02988+K02986+K02930+K02930+K02949+K02882+K02887+K02878+K02966+K02966+K02935+K02903+K02903+K02899+K02948+K02948+K02877+K02877+K02881+K02881+K02952+K02983+K02983+K02983+K02983+K02906+K02961+…
Metabolism	Global and Overview	Carbon metabolism	387	ko01200	Unigene0000409;Unigene0000410;Unigene0000535;Unigene0001059;Unigene0001830;Unigene0001831;Unigene0001883;Unigene0002293;Unigene0002441;Unigene0003487;Unigene0003488;Unigene0003557;Unigene0003685;Unigene0003690;Unigene0003691;Unigene0003731;Unigene0003732;Unigene0004076;Unigene0004077;Unigene0004408;Unigene0004547;Unigene0004951;Unigene0004952;Unigene0004977;Unigene0004978;Unigene0006619;Unigene00…	K00028+K00028+K00134+K00615+K01610+K01610+K01963+K01637+K11517+K01623+K01623+K01623+K01681+K01601+K01601+K00927+K00927+K01057+K01057+K14455+K01803+K01689+K01689+K01689+K01689+K01595+K01595+K05298+K05298+K00234+K00234+K00234+K00382+K00873+K00162+K00600+K00029+K00029+K00873+K00873+K00029+K00029+K00051+K00051+K00626+K11517+K11517+K00261+K00261+K00261+K01679+K01679+K01754+K01610+K01610+K14454+K14454+…
Environmental Information Processing	Signal transduction	Plant hormone signal transduction	368	ko04075	Unigene0000059;Unigene0000060;Unigene0000907;Unigene0001117;Unigene0001360;Unigene0001381;Unigene0001386;Unigene0001387;Unigene0001388;Unigene0001389;Unigene0001460;Unigene0001582;Unigene0002402;Unigene0003492;Unigene0003760;Unigene0003761;Unigene0003835;Unigene0003836;Unigene0004359;Unigene0004360;Unigene0004644;Unigene0004645;Unigene0004798;Unigene0004799;Unigene0004839;Unigene0005133;Unigene00…	K14488+K14488+K14488+K14488+K14488+K14496+K14496+K14496+K14496+K14496+K14484+K14514+K14508+K14484+K14496+K14496+K14496+K14496+K13422+K13422+K14484+K14484+K14497+K14497+K14492+K14494+K14516+K14488+K14488+K14488+K14496+K13422+K14491+K14491+K14496+K14496+K14496+K14513+K13416+K14488+K14488+K14488+K14514+K14514+K14496+K14496+K14488+K14492+K14492+K14488+K14500+K14496+K14496+K14499+K13463+K14484+K14491+…
Metabolism	Global and Overview	Biosynthesis of amino acids	360	ko01230	Unigene0000182;Unigene0000183;Unigene0000535;Unigene0001059;Unigene0001083;Unigene0001084;Unigene0001481;Unigene0002363;Unigene0002820;Unigene0002969;Unigene0002970;Unigene0003434;Unigene0003487;Unigene0003488;Unigene0003557;Unigene0003685;Unigene0003731;Unigene0003732;Unigene0004015;Unigene0004016;Unigene0004081;Unigene0004329;Unigene0004408;Unigene0004547;Unigene0004951;Unigene0004952;Unigene00…	K12524+K12524+K00134+K00615+K15227+K15227+K01663+K05359+K01696+K01735+K01735+K00930+K01623+K01623+K01623+K01681+K00927+K00927+K01609+K01609+K01733+K00549+K14455+K01803+K01689+K01689+K01689+K01689+K00811+K00053+K00053+K00549+K00549+K01696+K01696+K00765+K01817+K01653+K00873+K00600+K00873+K00873+K01703+K01703+K01703+K01754+K14454+K14454+K14454+K00058+K00600+K00600+K00873+K00873+K00873+K00927+K00789+…
Metabolism	Carbohydrate metabolism	Starch and sucrose metabolism	306	ko00500	Unigene0000195;Unigene0000196;Unigene0000465;Unigene0001692;Unigene0001744;Unigene0002375;Unigene0003817;Unigene0004019;Unigene0004023;Unigene0004024;Unigene0004606;Unigene0005198;Unigene0005271;Unigene0005272;Unigene0005582;Unigene0005583;Unigene0005726;Unigene0005727;Unigene0006822;Unigene0006823;Unigene0006836;Unigene0006837;Unigene0007017;Unigene0007018;Unigene0008545;Unigene0008781;Unigene00…	K01193+K01193+K08679+K13648+K01213+K01051+K00975+K13648+K01835+K01835+K08679+K01051+K01051+K01051+K13648+K13648+K01188+K01188+K00695+K00695+K08679+K08679+K01051+K01051+K01188+K00847+K00703+K13648+K13648+K01051+K01051+K01177+K01177+K01177+K01177+K01184+K08678+K08678+K01513+K01051+K01051+K01051+K01051+K13648+K13648+K00770+K00770+K00770+K00770+K01177+K01177+K01184+K01184+K01051+K00012+K00012+K00012+…
Genetic Information Processing	Folding, sorting and degradation	Protein processing in endoplasmic reticulum	279	ko04141	Unigene0000189;Unigene0000293;Unigene0000566;Unigene0000572;Unigene0000646;Unigene0000709;Unigene0000743;Unigene0000928;Unigene0000929;Unigene0000995;Unigene0000996;Unigene0001526;Unigene0001722;Unigene0002576;Unigene0003503;Unigene0003504;Unigene0003736;Unigene0003737;Unigene0004217;Unigene0004290;Unigene0004291;Unigene0004425;Unigene0004563;Unigene0004589;Unigene0004590;Unigene0004591;Unigene00…	K14009+K03283+K10950+K13993+K13993+K13993+K13993+K12668+K12668+K12669+K12669+K01456+K11718+K13993+K09584+K09584+K10666+K10666+K03283+K09580+K09580+K13993+K13993+K07151+K07151+K01230+K01230+K13993+K07953+K08057+K08057+K13993+K14007+K03868+K03868+K03283+K14012+K14012+K13989+K04523+K04523+K09487+K10666+K10666+K13525+K13525+K13993+K01456+K14015+K03094+K07151+K07151+K12666+K01456+K09487+K09487+K13984+…
Cellular Processes	Transport and catabolism	Endocytosis	256	ko04144	Unigene0000109;Unigene0000293;Unigene0001053;Unigene0001097;Unigene0001098;Unigene0001164;Unigene0001344;Unigene0001345;Unigene0001626;Unigene0001929;Unigene0002229;Unigene0002545;Unigene0002829;Unigene0003628;Unigene0004217;Unigene0006622;Unigene0006623;Unigene0006624;Unigene0006787;Unigene0006788;Unigene0007224;Unigene0007609;Unigene0008052;Unigene0008320;Unigene0008662;Unigene0008663;Unigene00…	K00889+K03283+K07897+K00889+K00889+K12191+K12183+K12183+K19476+K12196+K05747+K19366+K07901+K01115+K03283+K19476+K19476+K19476+K12486+K12486+K12196+K03283+K12196+K07904+K12492+K12492+K12190+K01115+K01115+K01115+K01115+K01115+K01115+K07889+K07937+K07937+K11824+K11824+K11824+K01115+K19366+K19366+K19366+K00889+K19476+K19476+K19476+K19476+K11866+K07904+K07904+K00889+K07889+K01115+K19476+K12483+K12483+…
Genetic Information Processing	Transcription	Spliceosome	244	ko03040	Unigene0000049;Unigene0000248;Unigene0000293;Unigene0001412;Unigene0001413;Unigene0001463;Unigene0002313;Unigene0002629;Unigene0002630;Unigene0002690;Unigene0002740;Unigene0003375;Unigene0003376;Unigene0003647;Unigene0003648;Unigene0003815;Unigene0003995;Unigene0004217;Unigene0004229;Unigene0005189;Unigene0005391;Unigene0006570;Unigene0006571;Unigene0006853;Unigene0007564;Unigene0007609;Unigene00…	K12622+K12823+K03283+K11097+K11097+K12855+K12837+K11086+K11086+K13025+K12833+K12873+K12873+K12854+K12854+K11095+K12741+K03283+K11091+K12823+K12849+K12816+K12816+K12896+K12847+K03283+K12822+K12827+K12840+K12840+K11099+K12848+K12848+K12817+K12878+K12878+K12741+K12741+K12741+K12821+K12863+K12823+K12823+K12849+K12733+K12836+K12896+K12896+K12836+K12836+K12818+K12818+K12885+K12885+K12881+K12881+K11098+…
Metabolism	Nucleotide metabolism	Purine metabolism	235	ko00230	Unigene0000931;Unigene0001136;Unigene0001439;Unigene0001539;Unigene0001736;Unigene0001882;Unigene0001889;Unigene0001890;Unigene0003518;Unigene0004023;Unigene0004024;Unigene0004129;Unigene0005840;Unigene0006301;Unigene0006302;Unigene0006463;Unigene0006464;Unigene0006926;Unigene0006927;Unigene0007292;Unigene0007325;Unigene0007326;Unigene0007527;Unigene0007528;Unigene0007763;Unigene0007764;Unigene00…	K03013+K02324+K01939+K03046+K03505+K03005+K03025+K03025+K10808+K01835+K01835+K03014+K03046+K01510+K01510+K00856+K00856+K13811+K13811+K02324+K03020+K03020+K03008+K03008+K00942+K00942+K00942+K01490+K01490+K00873+K01939+K02327+K00873+K00873+K01513+K00873+K00873+K00873+K00940+K00940+K00873+K03017+K10808+K00940+K00939+K00873+K00873+K03008+K00940+K00873+K00873+K03011+K03011+K03011+K00939+K00939+K03504+…
Genetic Information Processing	Translation	RNA transport	235	ko03013	Unigene0000541;Unigene0000602;Unigene0000603;Unigene0001853;Unigene0001854;Unigene0001917;Unigene0001918;Unigene0002093;Unigene0002690;Unigene0003246;Unigene0003451;Unigene0003547;Unigene0003548;Unigene0003994;Unigene0004135;Unigene0004314;Unigene0004315;Unigene0004686;Unigene0004837;Unigene0005166;Unigene0005494;Unigene0006628;Unigene0007526;Unigene0007818;Unigene0007819;Unigene0008176;Unigene00…	K03239+K05019+K05019+K14325+K14325+K14317+K14317+K03231+K13025+K14324+K03243+K03259+K03259+K14314+K12160+K03252+K03252+K13126+K03113+K03251+K07562+K13114+K18213+K14309+K14309+K14295+K14313+K14313+K03113+K14326+K14326+K13126+K12878+K12878+K03260+K03260+K03260+K03260+K03260+K14308+K14308+K14328+K14328+K03247+K03247+K13126+K03257+K14004+K14326+K13126+K13126+K03236+K13130+K13130+K13130+K13126+K00784+…
Metabolism	Biosynthesis of other secondary metabolites	Phenylpropanoid biosynthesis	232	ko00940	Unigene0001577;Unigene0001793;Unigene0001795;Unigene0001796;Unigene0002271;Unigene0002378;Unigene0002392;Unigene0002427;Unigene0003462;Unigene0003598;Unigene0003833;Unigene0003834;Unigene0004104;Unigene0004127;Unigene0004527;Unigene0004528;Unigene0005284;Unigene0005348;Unigene0005349;Unigene0005580;Unigene0005581;Unigene0005622;Unigene0005726;Unigene0005727;Unigene0005897;Unigene0006427;Unigene00…	K00430+K00430+K00430+K00430+K00430+K09755+K00430+K00430+K01904+K09753+K00430+K00430+K00430+K00430+K00430+K00430+K00430+K10775+K10775+K00588+K00588+K00083+K01188+K01188+K11188+K00430+K00430+K00430+K11188+K18368+K18368+K18368+K01904+K01904+K09755+K01188+K00430+K00430+K00430+K00430+K10775+K00430+K00430+K10775+K00430+K10775+K10775+K10775+K10775+K13066+K13066+K13066+K00083+K00083+K00083+K05349+K10775+…
Organismal Systems	Environmental adaptation	Plant-pathogen interaction	223	ko04626	Unigene0000328;Unigene0000329;Unigene0000969;Unigene0001350;Unigene0001374;Unigene0002448;Unigene0003902;Unigene0003903;Unigene0004496;Unigene0004872;Unigene0005281;Unigene0005282;Unigene0005490;Unigene0006032;Unigene0006033;Unigene0006056;Unigene0006057;Unigene0006974;Unigene0006994;Unigene0007007;Unigene0007009;Unigene0007039;Unigene0007056;Unigene0007057;Unigene0007490;Unigene0007491;Unigene00…	K13448+K13448+K02183+K13412+K13448+K13413+K13412+K13412+K13447+K13448+K13412+K13412+K13447+K13412+K13412+K13412+K13412+K13428+K02183+K05391+K13459+K13416+K05391+K05391+K13448+K13448+K13458+K13448+K18880+K09487+K02183+K13428+K18835+K18835+K18835+K13448+K00864+K00864+K00864+K13412+K13412+K05391+K05391+K05391+K13459+K13448+K13412+K13448+K13448+K13448+K09487+K09487+K05391+K05391+K13447+K13447+K13425+…
Genetic Information Processing	Folding, sorting and degradation	Ubiquitin mediated proteolysis	209	ko04120	Unigene0000102;Unigene0001658;Unigene0001659;Unigene0002397;Unigene0002398;Unigene0003341;Unigene0003342;Unigene0003409;Unigene0003410;Unigene0003826;Unigene0004892;Unigene0005824;Unigene0005825;Unigene0006275;Unigene0006276;Unigene0006277;Unigene0006668;Unigene0006847;Unigene0006848;Unigene0010524;Unigene0010754;Unigene0013275;Unigene0013276;Unigene0013344;Unigene0013729;Unigene0013730;Unigene00…	K10144+K03363+K03363+K03355+K03355+K10144+K10144+K10583+K10583+K06688+K10144+K03363+K03363+K04506+K04506+K04506+K10686+K03868+K03868+K03351+K03094+K03352+K03352+K10597+K10592+K10592+K10573+K03178+K03178+K03178+K06689+K10601+K04706+K04706+K04706+K03364+K10143+K10143+K03094+K03094+K10590+K03872+K03872+K09561+K09561+K09561+K09561+K10599+K10599+K10599+K10580+K10580+K10610+K10610+K10591+K10579+K10579+…
Metabolism	Energy metabolism	Oxidative phosphorylation	200	ko00190	Unigene0000035;Unigene0000036;Unigene0000098;Unigene0000099;Unigene0000127;Unigene0000436;Unigene0001038;Unigene0001395;Unigene0002052;Unigene0002300;Unigene0002501;Unigene0002855;Unigene0003192;Unigene0003365;Unigene0003366;Unigene0003498;Unigene0003499;Unigene0003671;Unigene0003672;Unigene0004168;Unigene0004712;Unigene0004713;Unigene0005050;Unigene0005083;Unigene0005320;Unigene0005321;Unigene00…	K02154+K02154+K02256+K02256+K02262+K02152+K03883+K03963+K00416+K02132+K03946+K05579+K02262+K02144+K02144+K02145+K02145+K05572+K05572+K02148+K02109+K02109+K02146+K03937+K03955+K03955+K02257+K02257+K03955+K03881+K03881+K03965+K03943+K03943+K02267+K00234+K00234+K00234+K02112+K02132+K03883+K02155+K02155+K02262+K02262+K02140+K02137+K03881+K05572+K03935+K02132+K02137+K02115+K03878+K03661+K03661+K02261+…
Metabolism	Carbohydrate metabolism	Amino sugar and nucleotide sugar metabolism	198	ko00520	Unigene0000465;Unigene0000509;Unigene0001461;Unigene0001462;Unigene0001692;Unigene0001776;Unigene0001910;Unigene0001911;Unigene0003220;Unigene0003715;Unigene0003817;Unigene0004019;Unigene0004023;Unigene0004024;Unigene0004452;Unigene0004606;Unigene0004879;Unigene0005582;Unigene0005583;Unigene0006836;Unigene0006837;Unigene0007619;Unigene0007651;Unigene0007652;Unigene0007711;Unigene0008373;Unigene00…	K08679+K01183+K00326+K00326+K13648+K02377+K01784+K01784+K01183+K00820+K00975+K13648+K01835+K01835+K00621+K08679+K01183+K13648+K13648+K08679+K08679+K01836+K13379+K13379+K05305+K10046+K00847+K12373+K12373+K13648+K13648+K00326+K00326+K01784+K01784+K01784+K01784+K08678+K08678+K13648+K13648+K00770+K00770+K00770+K00770+K12450+K12450+K01183+K01183+K01183+K13379+K13379+K00012+K00012+K00012+K00975+K00975+…
Genetic Information Processing	Folding, sorting and degradation	RNA degradation	184	ko03018	Unigene0000049;Unigene0002236;Unigene0002327;Unigene0004686;Unigene0004951;Unigene0004952;Unigene0004975;Unigene0004977;Unigene0004978;Unigene0005117;Unigene0005501;Unigene0005502;Unigene0006078;Unigene0006896;Unigene0008804;Unigene0008805;Unigene0008806;Unigene0009088;Unigene0009089;Unigene0009313;Unigene0009730;Unigene0010173;Unigene0010174;Unigene0010380;Unigene0011410;Unigene0012577;Unigene00…	K12622+K12619+K12581+K13126+K01689+K01689+K12619+K01689+K01689+K12619+K12598+K12598+K12619+K12581+K12608+K12608+K12608+K12598+K12598+K04077+K12608+K07573+K07573+K13126+K12581+K12581+K13126+K12616+K12616+K12619+K12581+K12581+K12619+K03681+K03681+K13126+K13126+K12606+K12606+K12606+K13126+K12617+K12617+K12617+K12592+K12619+K12617+K12619+K04077+K04077+K04077+K04077+K03679+K12619+K00850+K00850+K00850+…
Metabolism	Nucleotide metabolism	Pyrimidine metabolism	181	ko00240	Unigene0000931;Unigene0001136;Unigene0001539;Unigene0001736;Unigene0001882;Unigene0001889;Unigene0001890;Unigene0003518;Unigene0004129;Unigene0005840;Unigene0006301;Unigene0006302;Unigene0007292;Unigene0007325;Unigene0007326;Unigene0007527;Unigene0007528;Unigene0008195;Unigene0009810;Unigene0009811;Unigene0010215;Unigene0010446;Unigene0010447;Unigene0010833;Unigene0011082;Unigene0011083;Unigene00…	K03013+K02324+K03046+K03505+K03005+K03025+K03025+K10808+K03014+K03046+K01510+K01510+K02324+K03020+K03020+K03008+K03008+K02327+K00857+K00857+K00384+K01955+K01955+K09903+K00609+K00609+K00940+K00940+K03017+K10808+K00940+K03008+K00940+K00207+K03011+K03011+K03011+K13800+K01465+K01465+K03504+K03504+K00384+K00384+K00384+K01493+K03009+K00857+K03000+K03000+K03000+K03016+K03016+K02328+K02328+K03007+K03007+…
Metabolism	Carbohydrate metabolism	Glycolysis / Gluconeogenesis	173	ko00010	Unigene0000535;Unigene0001830;Unigene0001831;Unigene0002336;Unigene0002337;Unigene0003487;Unigene0003488;Unigene0003557;Unigene0003731;Unigene0003732;Unigene0004023;Unigene0004024;Unigene0004547;Unigene0004951;Unigene0004952;Unigene0004977;Unigene0004978;Unigene0007911;Unigene0007949;Unigene0008097;Unigene0008707;Unigene0008708;Unigene0009371;Unigene0009372;Unigene0009719;Unigene0009720;Unigene00…	K00134+K01610+K01610+K01568+K01568+K01623+K01623+K01623+K00927+K00927+K01835+K01835+K01803+K01689+K01689+K01689+K01689+K00382+K00873+K00162+K00873+K00873+K01610+K01610+K00128+K00128+K00128+K00128+K00128+K00873+K00873+K00873+K00927+K00873+K15634+K15634+K15634+K15634+K01623+K00873+K00873+K00131+K01623+K01785+K01785+K00873+K00873+K00128+K00128+K00627+K00627+K00627+K03841+K03841+K00121+K00121+K00844+…
Genetic Information Processing	Translation	mRNA surveillance pathway	156	ko03015	Unigene0000090;Unigene0000091;Unigene0000264;Unigene0000265;Unigene0000266;Unigene0000486;Unigene0001853;Unigene0001854;Unigene0002690;Unigene0003246;Unigene0004233;Unigene0004234;Unigene0004235;Unigene0004686;Unigene0004972;Unigene0004973;Unigene0005155;Unigene0005156;Unigene0006628;Unigene0006729;Unigene0006730;Unigene0006731;Unigene0006905;Unigene0006906;Unigene0006907;Unigene0007548;Unigene00…	K08873+K08873+K14407+K14407+K14407+K08873+K14325+K14325+K13025+K14324+K11583+K11583+K11583+K13126+K14396+K14396+K11584+K11584+K13114+K11583+K11583+K11583+K04354+K04354+K04354+K11584+K11584+K14411+K14404+K14404+K14326+K14326+K13126+K14328+K14328+K13126+K14326+K13126+K13126+K11584+K14411+K13126+K13917+K13917+K12881+K12881+K03267+K12812+K12812+K03456+K03456+K14402+K14402+K14400+K06269+K06269+K14411+…
Genetic Information Processing	Translation	Ribosome biogenesis in eukaryotes	146	ko03008	Unigene0002236;Unigene0002844;Unigene0003490;Unigene0004483;Unigene0004484;Unigene0004975;Unigene0005117;Unigene0005494;Unigene0006078;Unigene0010848;Unigene0010849;Unigene0013112;Unigene0013113;Unigene0014117;Unigene0014622;Unigene0016666;Unigene0017073;Unigene0017561;Unigene0018861;Unigene0020049;Unigene0020271;Unigene0020650;Unigene0020651;Unigene0022139;Unigene0022320;Unigene0022321;Unigene00…	K12619+K11128+K14521+K14550+K14550+K12619+K12619+K07562+K12619+K14570+K14570+K14521+K14521+K12619+K12619+K14536+K12619+K12619+K12619+K03115+K12619+K12845+K12845+K14544+K03097+K03097+K06943+K11129+K11129+K14545+K12619+K11130+K11130+K14572+K14572+K14572+K14572+K14572+K14561+K14521+K14521+K13288+K13288+K14548+K12619+K12619+K14557+K14557+K12619+K03115+K14554+K12619+K12619+K12619+K12619+K12619+K12619+…
Metabolism	Lipid metabolism	Glycerophospholipid metabolism	137	ko00564	Unigene0001705;Unigene0003628;Unigene0004795;Unigene0006407;Unigene0006408;Unigene0006409;Unigene0007189;Unigene0007483;Unigene0008819;Unigene0008820;Unigene0008821;Unigene0009265;Unigene0009299;Unigene0009300;Unigene0009301;Unigene0010632;Unigene0012003;Unigene0012086;Unigene0012087;Unigene0012834;Unigene0012835;Unigene0013890;Unigene0013891;Unigene0015767;Unigene0015824;Unigene0018186;Unigene00…	K00006+K01115+K13508+K16818+K16818+K16818+K13519+K00111+K01115+K01115+K01115+K13513+K01115+K01115+K01115+K06130+K01115+K13508+K13508+K13523+K13523+K06130+K06130+K01115+K06129+K00981+K01114+K01114+K16860+K16860+K16860+K14156+K14156+K14156+K14674+K00006+K13508+K13508+K13508+K13508+K13511+K13511+K13511+K13511+K00630+K00630+K05929+K05929+K05929+K15728+K15728+K15728+K01115+K01115+K00968+K13506+K13506+…
Cellular Processes	Transport and catabolism	Peroxisome	131	ko04146	Unigene0002102;Unigene0002441;Unigene0002661;Unigene0002662;Unigene0003188;Unigene0003189;Unigene0003307;Unigene0004286;Unigene0004287;Unigene0006539;Unigene0006804;Unigene0006805;Unigene0008426;Unigene0008427;Unigene0008835;Unigene0009156;Unigene0009157;Unigene0009660;Unigene0009661;Unigene0011378;Unigene0011379;Unigene0011832;Unigene0011833;Unigene0012437;Unigene0012438;Unigene0012439;Unigene00…	K04564+K11517+K12261+K12261+K13354+K13354+K13337+K01640+K01640+K13347+K01640+K01640+K12663+K12663+K04565+K11517+K11517+K00869+K00869+K00306+K00306+K04564+K04564+K01897+K01897+K01897+K01897+K01897+K07513+K07513+K13356+K04565+K17879+K17879+K13338+K13338+K00232+K13344+K13336+K13336+K04564+K04564+K03426+K01897+K01897+K01897+K13342+K13342+K13348+K13348+K13348+K13348+K11147+K11147+K04565+K04565+K04565+…
Metabolism	Carbohydrate metabolism	Pyruvate metabolism	129	ko00620	Unigene0000409;Unigene0000410;Unigene0001830;Unigene0001831;Unigene0001883;Unigene0002014;Unigene0002015;Unigene0003881;Unigene0003882;Unigene0003883;Unigene0006619;Unigene0006620;Unigene0007911;Unigene0007949;Unigene0008097;Unigene0008700;Unigene0008701;Unigene0008707;Unigene0008708;Unigene0008721;Unigene0008722;Unigene0008802;Unigene0008803;Unigene0008948;Unigene0009359;Unigene0009360;Unigene00…	K00028+K00028+K01610+K01610+K01963+K01759+K01759+K18881+K18881+K18881+K01595+K01595+K00382+K00873+K00162+K00029+K00029+K00873+K00873+K00029+K00029+K00051+K00051+K00626+K01679+K01679+K01610+K01610+K00128+K00128+K00128+K00128+K00128+K00873+K00873+K00873+K01069+K01069+K01759+K00873+K00873+K00873+K01649+K01649+K02160+K02160+K00873+K00873+K00128+K00128+K01759+K00627+K00627+K00627+K00026+K00128+K01759+…
Metabolism	Amino acid metabolism	Cysteine and methionine metabolism	129	ko00270	Unigene0000182;Unigene0000183;Unigene0000413;Unigene0000414;Unigene0004329;Unigene0004408;Unigene0005025;Unigene0005095;Unigene0005765;Unigene0006150;Unigene0006151;Unigene0007444;Unigene0008807;Unigene0008812;Unigene0009465;Unigene0009466;Unigene0009467;Unigene0009689;Unigene0010729;Unigene0010730;Unigene0010913;Unigene0010914;Unigene0010915;Unigene0010916;Unigene0014034;Unigene0014035;Unigene00…	K12524+K12524+K01611+K01611+K00549+K14455+K00811+K01611+K01762+K00549+K00549+K01762+K08967+K01611+K14454+K14454+K14454+K05933+K01762+K01762+K00789+K00789+K00789+K00789+K00640+K05933+K01739+K01739+K00640+K00640+K01738+K01738+K00815+K00026+K00547+K00899+K00899+K14455+K00815+K01738+K00826+K01762+K00025+K00928+K00928+K00640+K00827+K00827+K00827+K08967+K08967+K00026+K00797+K00815+K00815+K01251+K01919+…
Environmental Information Processing	Membrane transport	ABC transporters	127	ko02010	Unigene0001055;Unigene0002680;Unigene0002778;Unigene0002808;Unigene0002987;Unigene0002988;Unigene0006077;Unigene0006332;Unigene0006333;Unigene0007150;Unigene0007151;Unigene0008215;Unigene0009082;Unigene0009563;Unigene0011137;Unigene0011138;Unigene0011460;Unigene0011461;Unigene0012034;Unigene0012035;Unigene0012177;Unigene0012178;Unigene0012543;Unigene0012544;Unigene0012545;Unigene0012654;Unigene00…	K05658+K05658+K05658+K05658+K05658+K05658+K05658+K05658+K05658+K05658+K05658+K05658+K05658+K05656+K05658+K05658+K05658+K05658+K05658+K05658+K05658+K05658+K05658+K05658+K05658+K05658+K05658+K05658+K05658+K05658+K05658+K05658+K05658+K05658+K05658+K05658+K05658+K05658+K05658+K05658+K05665+K05665+K05658+K05658+K05658+K05658+K05658+K05658+K05658+K05658+K05658+K05658+K05658+K05658+K05658+K05658+K05658+…
Genetic Information Processing	Replication and repair	Nucleotide excision repair	124	ko03420	Unigene0001136;Unigene0001457;Unigene0001736;Unigene0001826;Unigene0001846;Unigene0001847;Unigene0004430;Unigene0004431;Unigene0004432;Unigene0006847;Unigene0006848;Unigene0007292;Unigene0008195;Unigene0010246;Unigene0010283;Unigene0014333;Unigene0015444;Unigene0016516;Unigene0016517;Unigene0017342;Unigene0017343;Unigene0018394;Unigene0018395;Unigene0019014;Unigene0019015;Unigene0019191;Unigene00…	K02324+K10756+K03505+K07466+K10756+K10756+K07466+K07466+K07466+K03868+K03868+K02324+K02327+K10756+K10755+K02202+K10754+K03504+K03504+K10843+K10843+K02328+K02328+K10610+K10610+K10754+K02324+K02324+K02324+K07466+K10739+K10739+K10739+K10756+K10756+K03142+K10844+K10839+K10839+K10839+K10848+K07466+K07466+K07466+K03868+K02324+K02324+K02324+K02324+K02324+K02324+K10740+K10609+K02326+K02326+K02326+K10747+…
Genetic Information Processing	Replication and repair	DNA replication	122	ko03030	Unigene0001136;Unigene0001457;Unigene0001736;Unigene0001826;Unigene0001846;Unigene0001847;Unigene0002152;Unigene0002153;Unigene0004430;Unigene0004431;Unigene0004432;Unigene0006814;Unigene0006815;Unigene0007292;Unigene0008195;Unigene0009864;Unigene0009865;Unigene0010246;Unigene0010283;Unigene0013487;Unigene0015444;Unigene0016516;Unigene0016517;Unigene0017158;Unigene0018394;Unigene0018395;Unigene00…	K02324+K10756+K03505+K07466+K10756+K10756+K02209+K02209+K07466+K07466+K07466+K10743+K10743+K02324+K02327+K02541+K02541+K10756+K10755+K10745+K10754+K03504+K03504+K10742+K02328+K02328+K10754+K02324+K02324+K02324+K03111+K03111+K02321+K02321+K07466+K02210+K02210+K02540+K02540+K02540+K02540+K10739+K10739+K10739+K10756+K10756+K10742+K10742+K10743+K10742+K07466+K07466+K07466+K02324+K02324+K02324+K02324+…
Metabolism	Global and Overview	Fatty acid metabolism	115	ko01212	Unigene0000354;Unigene0001883;Unigene0001919;Unigene0002548;Unigene0002549;Unigene0002933;Unigene0004538;Unigene0004539;Unigene0007721;Unigene0007722;Unigene0007723;Unigene0008526;Unigene0008661;Unigene0008837;Unigene0008948;Unigene0010755;Unigene0012437;Unigene0012438;Unigene0012439;Unigene0012440;Unigene0012441;Unigene0012824;Unigene0012825;Unigene0013825;Unigene0014295;Unigene0014296;Unigene00…	K00507+K01963+K00507+K10781+K10781+K10256+K00059+K00059+K10527+K10527+K10527+K00059+K09458+K10258+K00626+K01074+K01897+K01897+K01897+K01897+K01897+K00208+K00208+K10258+K00059+K00059+K00507+K00507+K00507+K07513+K07513+K02160+K02160+K10703+K03921+K00232+K01897+K01897+K01897+K00507+K00507+K00059+K03921+K03921+K10527+K00507+K00507+K01897+K01897+K01897+K01962+K01962+K01962+K07513+K01897+K01897+K09458+…
Metabolism	Energy metabolism	Carbon fixation in photosynthetic organisms	112	ko00710	Unigene0000409;Unigene0000410;Unigene0000535;Unigene0001059;Unigene0001830;Unigene0001831;Unigene0003487;Unigene0003488;Unigene0003557;Unigene0003690;Unigene0003691;Unigene0003731;Unigene0003732;Unigene0004408;Unigene0004547;Unigene0006619;Unigene0006620;Unigene0006772;Unigene0006773;Unigene0008700;Unigene0008701;Unigene0008721;Unigene0008722;Unigene0008802;Unigene0008803;Unigene0009371;Unigene00…	K00028+K00028+K00134+K00615+K01610+K01610+K01623+K01623+K01623+K01601+K01601+K00927+K00927+K14455+K01803+K01595+K01595+K05298+K05298+K00029+K00029+K00029+K00029+K00051+K00051+K01610+K01610+K14454+K14454+K14454+K00927+K01623+K01623+K03841+K03841+K00026+K00615+K01783+K01783+K01783+K01803+K01803+K05298+K01602+K01602+K01602+K01623+K01623+K14455+K03841+K03841+K00028+K00028+K00028+K00029+K00814+K00814+…
Metabolism	Amino acid metabolism	Phenylalanine metabolism	111	ko00360	Unigene0000355;Unigene0000356;Unigene0000357;Unigene0003462;Unigene0004408;Unigene0004419;Unigene0005025;Unigene0005348;Unigene0005349;Unigene0005580;Unigene0005581;Unigene0006286;Unigene0007738;Unigene0007739;Unigene0009465;Unigene0009466;Unigene0009467;Unigene0011222;Unigene0012529;Unigene0013802;Unigene0014152;Unigene0014153;Unigene0014154;Unigene0014874;Unigene0015355;Unigene0015356;Unigene00…	K01426+K01426+K01426+K01904+K14455+K01426+K00811+K10775+K10775+K00588+K00588+K07253+K01904+K01904+K14454+K14454+K14454+K10775+K10775+K10775+K10775+K10775+K10775+K07253+K10775+K10775+K10775+K10775+K00276+K00276+K10775+K01426+K01426+K01426+K01426+K01426+K00815+K07253+K07253+K00276+K01904+K01904+K10775+K01904+K01904+K14455+K00074+K00074+K00815+K01426+K10775+K10775+K00276+K00276+K10775+K10775+K10775+…
Metabolism	Metabolism of other amino acids	Glutathione metabolism	111	ko00480	Unigene0000152;Unigene0000153;Unigene0002681;Unigene0003518;Unigene0005891;Unigene0008003;Unigene0008095;Unigene0008231;Unigene0008382;Unigene0010925;Unigene0010926;Unigene0011939;Unigene0012200;Unigene0012201;Unigene0012261;Unigene0012443;Unigene0012722;Unigene0016045;Unigene0016046;Unigene0017581;Unigene0017733;Unigene0017734;Unigene0019111;Unigene0019112;Unigene0019113;Unigene0019972;Unigene00…	K00432+K00432+K00799+K10808+K00799+K00799+K00799+K00799+K00799+K00799+K00799+K00799+K00033+K00033+K00799+K10808+K00799+K00799+K00799+K01581+K00799+K00799+K00799+K00799+K00799+K00799+K00799+K00799+K00799+K00799+K00033+K00799+K00799+K00799+K00799+K00434+K00799+K00799+K00799+K00799+K00432+K00799+K00799+K00799+K00799+K01256+K01256+K10808+K00797+K00383+K00799+K00031+K18592+K00434+K00434+K00036+K00036+…
Metabolism	Amino acid metabolism	Glycine, serine and threonine metabolism	110	ko00260	Unigene0000182;Unigene0000183;Unigene0002820;Unigene0004081;Unigene0006481;Unigene0006482;Unigene0007911;Unigene0008474;Unigene0009363;Unigene0009510;Unigene0009511;Unigene0009665;Unigene0009808;Unigene0009809;Unigene0010152;Unigene0011378;Unigene0011379;Unigene0012444;Unigene0012445;Unigene0012446;Unigene0012447;Unigene0015904;Unigene0016067;Unigene0016068;Unigene0016481;Unigene0016482;Unigene00…	K12524+K12524+K01696+K01733+K01696+K01696+K00382+K00600+K01754+K00130+K00130+K00058+K00600+K00600+K02437+K00306+K00306+K15634+K15634+K15634+K15634+K00831+K00276+K00276+K00831+K00831+K00276+K15919+K15919+K02437+K02437+K15633+K15634+K00058+K00058+K15919+K15919+K15919+K01733+K00600+K00600+K00600+K00928+K00928+K00276+K00276+K00382+K01754+K00827+K00827+K00827+K01695+K01695+K01695+K15919+K01834+K01834+…
Metabolism	Carbohydrate metabolism	Pentose and glucuronate interconversions	108	ko00040	Unigene0001744;Unigene0002375;Unigene0003483;Unigene0003484;Unigene0005148;Unigene0005149;Unigene0005198;Unigene0005271;Unigene0005272;Unigene0006740;Unigene0007017;Unigene0007018;Unigene0009294;Unigene0009295;Unigene0009713;Unigene0009719;Unigene0009720;Unigene0009721;Unigene0009739;Unigene0009740;Unigene0009999;Unigene0010000;Unigene0010017;Unigene0010018;Unigene0010593;Unigene0011196;Unigene00…	K01213+K01051+K00854+K00854+K01728+K01728+K01051+K01051+K01051+K01728+K01051+K01051+K01051+K01051+K01184+K00128+K00128+K00128+K00128+K00128+K01051+K01051+K01051+K01051+K01184+K01184+K01051+K00012+K00012+K00012+K01051+K00128+K00128+K01184+K01184+K16190+K16190+K00012+K00012+K01051+K01051+K01051+K01213+K01213+K01051+K01051+K01051+K00012+K00012+K00128+K01783+K01783+K01783+K01184+K01184+K01728+K01728+…
Cellular Processes	Transport and catabolism	Phagosome	104	ko04145	Unigene0000035;Unigene0000036;Unigene0000436;Unigene0001053;Unigene0001474;Unigene0002174;Unigene0002175;Unigene0003365;Unigene0003366;Unigene0003498;Unigene0003499;Unigene0004168;Unigene0005050;Unigene0005644;Unigene0005645;Unigene0006208;Unigene0006209;Unigene0008604;Unigene0008782;Unigene0008783;Unigene0009820;Unigene0009821;Unigene0010037;Unigene0010953;Unigene0010954;Unigene0013064;Unigene00…	K02154+K02154+K02152+K07897+K07374+K07375+K07375+K02144+K02144+K02145+K02145+K02148+K02146+K08517+K08517+K08057+K08057+K07374+K04392+K04392+K02155+K02155+K07889+K04392+K04392+K03661+K03661+K08008+K04392+K04392+K07374+K07374+K07889+K04392+K04392+K09481+K08517+K08517+K07375+K07375+K02150+K02152+K07889+K07375+K07374+K07897+K07897+K09481+K02155+K02155+K07897+K04392+K04392+K08054+K08054+K04392+K07342+…
Metabolism	Energy metabolism	Photosynthesis	102	ko00195	Unigene0000403;Unigene0000404;Unigene0003698;Unigene0003699;Unigene0004652;Unigene0004712;Unigene0004713;Unigene0005377;Unigene0005378;Unigene0005955;Unigene0007219;Unigene0007638;Unigene0008650;Unigene0008677;Unigene0010527;Unigene0011136;Unigene0011639;Unigene0012212;Unigene0012213;Unigene0012587;Unigene0012786;Unigene0012787;Unigene0012788;Unigene0012884;Unigene0013412;Unigene0014290;Unigene00…	K02705+K02705+K02717+K02717+K02639+K02109+K02109+K03541+K03541+K02706+K02723+K02704+K02112+K02694+K02717+K02704+K02638+K02703+K02703+K02115+K02641+K02641+K02641+K02689+K02723+K02109+K08901+K02110+K02639+K02639+K02698+K02698+K02109+K02109+K08903+K02693+K02693+K03541+K02639+K02717+K02109+K02636+K02636+K02707+K02689+K02690+K02690+K02690+K02690+K02690+K08902+K02111+K02111+K02111+K14332+K14332+K02716+…
Metabolism	Carbohydrate metabolism	Glyoxylate and dicarboxylate metabolism	100	ko00630	Unigene0002293;Unigene0002441;Unigene0003685;Unigene0003690;Unigene0003691;Unigene0007911;Unigene0008474;Unigene0008948;Unigene0009156;Unigene0009157;Unigene0009808;Unigene0009809;Unigene0010152;Unigene0011875;Unigene0011877;Unigene0017260;Unigene0018215;Unigene0018216;Unigene0019979;Unigene0019980;Unigene0020507;Unigene0020508;Unigene0020509;Unigene0022655;Unigene0022656;Unigene0022657;Unigene00…	K01637+K11517+K01681+K01601+K01601+K00382+K00600+K00626+K11517+K11517+K00600+K00600+K02437+K00122+K00122+K00026+K15919+K15919+K02437+K02437+K01602+K01602+K01602+K15919+K15919+K15919+K19269+K19269+K00600+K00600+K00600+K00025+K00382+K15919+K01915+K01915+K18121+K00026+K01915+K01915+K00605+K18121+K18121+K01647+K01681+K01647+K00600+K00600+K00600+K00600+K00600+K00284+K00284+K00600+K01602+K01602+K15919+…
Genetic Information Processing	Replication and repair	Homologous recombination	98	ko03440	Unigene0001061;Unigene0001227;Unigene0001736;Unigene0001826;Unigene0002030;Unigene0004430;Unigene0004431;Unigene0004432;Unigene0005768;Unigene0007193;Unigene0007194;Unigene0007195;Unigene0007196;Unigene0008195;Unigene0008764;Unigene0008765;Unigene0010119;Unigene0010120;Unigene0011317;Unigene0011318;Unigene0016516;Unigene0016517;Unigene0017832;Unigene0017833;Unigene0018394;Unigene0018395;Unigene00…	K10875+K10875+K03505+K07466+K10875+K07466+K07466+K07466+K10875+K08775+K08775+K08775+K08775+K02327+K03553+K03553+K10880+K10880+K10875+K10875+K03504+K03504+K10901+K10901+K02328+K02328+K03553+K10881+K08775+K08775+K08775+K03111+K03111+K07466+K10739+K10739+K10739+K10871+K10871+K10871+K10881+K10875+K07466+K07466+K07466+K10740+K03165+K03165+K10875+K10866+K03553+K03553+K10739+K10739+K02335+K02335+K02335+…
Genetic Information Processing	Translation	Aminoacyl-tRNA biosynthesis	98	ko00970	Unigene0002898;Unigene0002899;Unigene0004259;Unigene0006719;Unigene0006735;Unigene0006736;Unigene0008232;Unigene0009202;Unigene0009203;Unigene0010668;Unigene0010669;Unigene0012176;Unigene0013544;Unigene0013545;Unigene0018908;Unigene0018909;Unigene0019330;Unigene0019335;Unigene0019336;Unigene0022604;Unigene0023352;Unigene0023353;Unigene0023354;Unigene0023356;Unigene0023357;Unigene0023601;Unigene00…	K01885+K01885+K01866+K01881+K02435+K02435+K01892+K01880+K01880+K01886+K01886+K01876+K01893+K01893+K01881+K01881+K01885+K01866+K01866+K01872+K01892+K01892+K01892+K01892+K01892+K01881+K01881+K01886+K01883+K01887+K01887+K01893+K01893+K01893+K01876+K01876+K01876+K01889+K01889+K01876+K01876+K01876+K01876+K04567+K04567+K04567+K01876+K01875+K01875+K01881+K01881+K01881+K02433+K02434+K02434+K01868+K01868+…
Metabolism	Amino acid metabolism	Arginine and proline metabolism	95	ko00330	Unigene0000355;Unigene0000356;Unigene0000357;Unigene0000413;Unigene0000414;Unigene0003726;Unigene0003727;Unigene0003776;Unigene0004408;Unigene0004419;Unigene0005025;Unigene0005095;Unigene0008812;Unigene0009000;Unigene0009465;Unigene0009466;Unigene0009467;Unigene0009719;Unigene0009720;Unigene0009721;Unigene0009739;Unigene0009740;Unigene0009857;Unigene0009879;Unigene0009880;Unigene0009881;Unigene00…	K01426+K01426+K01426+K01611+K01611+K12259+K12259+K00472+K14455+K01426+K00811+K01611+K01611+K00294+K14454+K14454+K14454+K00128+K00128+K00128+K00128+K00128+K00472+K10536+K10536+K10536+K12251+K00128+K00128+K01426+K01426+K01426+K01426+K01426+K00286+K00286+K00286+K00472+K01581+K00128+K00472+K01476+K14455+K13366+K01426+K12657+K12657+K00819+K00128+K00128+K00128+K00797+K00472+K00472+K00472+K00472+K00472+…
Metabolism	Carbohydrate metabolism	Inositol phosphate metabolism	94	ko00562	Unigene0000109;Unigene0001097;Unigene0001098;Unigene0004547;Unigene0006752;Unigene0007774;Unigene0009886;Unigene0010354;Unigene0010355;Unigene0012431;Unigene0012434;Unigene0012435;Unigene0013262;Unigene0013810;Unigene0013811;Unigene0015032;Unigene0017238;Unigene0017239;Unigene0017240;Unigene0018423;Unigene0018424;Unigene0018882;Unigene0018883;Unigene0019617;Unigene0019618;Unigene0021246;Unigene00…	K00889+K00889+K00889+K01803+K00913+K00915+K00469+K01110+K01110+K15422+K00913+K00913+K00889+K10047+K10047+K00889+K00889+K00889+K00889+K01114+K01114+K01803+K01803+K00140+K00140+K01099+K00913+K01092+K01110+K01110+K05857+K05857+K05857+K10572+K10572+K05857+K00888+K00888+K10047+K10047+K00913+K00915+K00889+K01858+K01858+K01858+K01858+K01858+K01858+K00889+K00889+K00889+K00889+K00469+K00914+K00914+K18649+…
Genetic Information Processing	Replication and repair	Mismatch repair	94	ko03430	Unigene0001457;Unigene0001736;Unigene0001826;Unigene0001846;Unigene0001847;Unigene0004173;Unigene0004174;Unigene0004430;Unigene0004431;Unigene0004432;Unigene0005380;Unigene0006810;Unigene0006811;Unigene0006812;Unigene0008195;Unigene0008239;Unigene0008240;Unigene0008261;Unigene0008262;Unigene0008263;Unigene0009373;Unigene0009374;Unigene0010246;Unigene0010283;Unigene0015444;Unigene0016516;Unigene00…	K10756+K03505+K07466+K10756+K10756+K10746+K10746+K07466+K07466+K07466+K10746+K08737+K08737+K08737+K02327+K08737+K08737+K10746+K10746+K10746+K08736+K08736+K10756+K10755+K10754+K03504+K03504+K02328+K02328+K10754+K03111+K03111+K07466+K10739+K10739+K10739+K10756+K10756+K07466+K07466+K07466+K10740+K10747+K10747+K10747+K10747+K10747+K10747+K10747+K10747+K07456+K07456+K04802+K10858+K10858+K10739+K10739+…
Genetic Information Processing	Replication and repair	Base excision repair	93	ko03410	Unigene0000964;Unigene0001136;Unigene0001527;Unigene0001736;Unigene0005039;Unigene0005040;Unigene0005079;Unigene0007292;Unigene0007825;Unigene0007826;Unigene0008195;Unigene0009220;Unigene0011669;Unigene0011670;Unigene0012355;Unigene0013224;Unigene0016516;Unigene0016517;Unigene0016710;Unigene0016711;Unigene0016712;Unigene0016713;Unigene0018394;Unigene0018395;Unigene0019227;Unigene0019228;Unigene00…	K10798+K02324+K01247+K03505+K10803+K10803+K10802+K02324+K03660+K03660+K02327+K03648+K01246+K01246+K01247+K10802+K03504+K03504+K10798+K10798+K10798+K10798+K02328+K02328+K10773+K10773+K10801+K10801+K10801+K02324+K02324+K02324+K01246+K01246+K03575+K03575+K03575+K01142+K01142+K02324+K02324+K02324+K02324+K02324+K02324+K02326+K02326+K02326+K10747+K10747+K10747+K10747+K10747+K10747+K10747+K10747+K04802+…
Environmental Information Processing	Signal transduction	Phosphatidylinositol signaling system	92	ko04070	Unigene0000109;Unigene0000969;Unigene0001097;Unigene0001098;Unigene0006752;Unigene0006994;Unigene0007774;Unigene0009212;Unigene0010354;Unigene0010355;Unigene0012431;Unigene0012434;Unigene0012435;Unigene0013262;Unigene0013810;Unigene0013811;Unigene0015032;Unigene0017238;Unigene0017239;Unigene0017240;Unigene0018186;Unigene0018454;Unigene0021246;Unigene0021609;Unigene0021610;Unigene0022477;Unigene00…	K00889+K02183+K00889+K00889+K00913+K02183+K00915+K02183+K01110+K01110+K15422+K00913+K00913+K00889+K10047+K10047+K00889+K00889+K00889+K00889+K00981+K02183+K01099+K02183+K02183+K00913+K01092+K01110+K01110+K02183+K02183+K02183+K05857+K05857+K05857+K10572+K10572+K05857+K00888+K00888+K02183+K00981+K00981+K10047+K10047+K00913+K00901+K00915+K00889+K00889+K00889+K00889+K00889+K00901+K00901+K00914+K00914+…
Metabolism	Carbohydrate metabolism	Galactose metabolism	92	ko00052	Unigene0000195;Unigene0000196;Unigene0001910;Unigene0001911;Unigene0004023;Unigene0004024;Unigene0009413;Unigene0009414;Unigene0009415;Unigene0009416;Unigene0012337;Unigene0013455;Unigene0013456;Unigene0013541;Unigene0013542;Unigene0014076;Unigene0014395;Unigene0014396;Unigene0015762;Unigene0015763;Unigene0016416;Unigene0016830;Unigene0016831;Unigene0016832;Unigene0017936;Unigene0018123;Unigene00…	K01193+K01193+K01784+K01784+K01835+K01835+K01784+K01784+K01784+K01784+K06611+K01785+K01785+K01193+K01193+K07407+K06617+K06617+K18819+K18819+K01193+K18819+K18819+K18819+K00965+K00844+K06617+K06617+K00850+K00850+K00850+K00850+K00850+K01785+K01785+K01187+K01187+K01193+K01193+K00850+K00850+K00850+K07407+K07407+K06617+K01785+K00850+K00850+K00850+K00850+K07407+K07407+K07407+K07407+K00963+K01190+K06617+…
Metabolism	Carbohydrate metabolism	Fructose and mannose metabolism	87	ko00051	Unigene0001776;Unigene0003487;Unigene0003488;Unigene0003557;Unigene0004547;Unigene0007686;Unigene0007687;Unigene0007711;Unigene0008781;Unigene0012509;Unigene0013391;Unigene0016508;Unigene0017006;Unigene0017007;Unigene0018123;Unigene0018882;Unigene0018883;Unigene0019454;Unigene0019544;Unigene0019546;Unigene0019672;Unigene0019673;Unigene0019732;Unigene0019734;Unigene0020062;Unigene0020063;Unigene00…	K02377+K01623+K01623+K01623+K01803+K00895+K00895+K05305+K00847+K01623+K01623+K00895+K03841+K03841+K00844+K01803+K01803+K01711+K00847+K00847+K17497+K17497+K00850+K00850+K00850+K00850+K00850+K19355+K01623+K01623+K03841+K03841+K01805+K01809+K00850+K00850+K00850+K01103+K01103+K00895+K00850+K00966+K00966+K00850+K00850+K00850+K00966+K00966+K00847+K00847+K00008+K00844+K00844+K00844+K00844+K00011+K00011+…
Metabolism	Lipid metabolism	Glycerolipid metabolism	84	ko00561	Unigene0001871;Unigene0001872;Unigene0004011;Unigene0004012;Unigene0004370;Unigene0004795;Unigene0007189;Unigene0009265;Unigene0009519;Unigene0009520;Unigene0009521;Unigene0009719;Unigene0009720;Unigene0009721;Unigene0009739;Unigene0009740;Unigene0012086;Unigene0012087;Unigene0012834;Unigene0012835;Unigene0012866;Unigene0012867;Unigene0014076;Unigene0015755;Unigene0015756;Unigene0018320;Unigene00…	K00679+K00679+K03715+K03715+K00679+K13508+K13519+K13513+K00864+K00864+K00864+K00128+K00128+K00128+K00128+K00128+K13508+K13508+K13523+K13523+K00679+K00679+K07407+K00128+K00128+K00128+K14674+K13508+K13508+K13508+K13508+K00630+K00630+K15728+K15728+K15728+K07407+K07407+K00128+K00128+K13506+K13506+K00128+K11155+K07407+K09480+K07407+K07407+K07407+K00655+K00901+K07407+K07407+K07407+K00011+K00011+K00863+…
Metabolism	Amino acid metabolism	Alanine, aspartate and glutamate metabolism	83	ko00250	Unigene0001439;Unigene0003715;Unigene0004408;Unigene0005025;Unigene0005728;Unigene0007937;Unigene0007938;Unigene0007987;Unigene0009000;Unigene0009347;Unigene0009348;Unigene0009349;Unigene0009465;Unigene0009466;Unigene0009467;Unigene0010446;Unigene0010447;Unigene0011082;Unigene0011083;Unigene0013593;Unigene0013594;Unigene0016052;Unigene0016053;Unigene0017851;Unigene0020372;Unigene0020373;Unigene00…	K01939+K00820+K14455+K00811+K01953+K00278+K00278+K01939+K00294+K00261+K00261+K00261+K14454+K14454+K14454+K01955+K01955+K00609+K00609+K16871+K16871+K01580+K01580+K01939+K00764+K00764+K14455+K00814+K00814+K01580+K00827+K00827+K00827+K00261+K00261+K00262+K00262+K00262+K01755+K01755+K01915+K01915+K01956+K01756+K01756+K01915+K01915+K00814+K00814+K00814+K00264+K00264+K00278+K00278+K00827+K16871+K01915+…
Metabolism	Lipid metabolism	alpha-Linolenic acid metabolism	83	ko00592	Unigene0000033;Unigene0002079;Unigene0002469;Unigene0004487;Unigene0004488;Unigene0006407;Unigene0006408;Unigene0006409;Unigene0007268;Unigene0007721;Unigene0007722;Unigene0007723;Unigene0010218;Unigene0010219;Unigene0011295;Unigene0011296;Unigene0014792;Unigene0014793;Unigene0015106;Unigene0016282;Unigene0016283;Unigene0016284;Unigene0016617;Unigene0016619;Unigene0016786;Unigene0019729;Unigene00…	K05894+K01723+K00454+K08241+K08241+K16818+K16818+K16818+K01723+K10527+K10527+K10527+K08241+K08241+K08241+K08241+K07513+K07513+K01723+K10525+K10525+K10525+K10525+K10525+K00232+K10526+K10526+K10528+K10528+K10528+K08241+K08241+K08241+K14674+K10527+K05894+K07513+K00454+K07513+K07513+K07513+K07513+K01047+K01047+K00232+K00454+K00454+K00454+K05894+K10529+K00454+K00454+K00454+K10528+K08241+K00232+K00232+…
Metabolism	Amino acid metabolism	Valine, leucine and isoleucine degradation	82	ko00280	Unigene0002725;Unigene0002726;Unigene0002727;Unigene0004286;Unigene0004287;Unigene0006804;Unigene0006805;Unigene0007589;Unigene0007590;Unigene0007911;Unigene0008948;Unigene0009719;Unigene0009720;Unigene0009721;Unigene0009739;Unigene0009740;Unigene0014792;Unigene0014793;Unigene0015755;Unigene0015756;Unigene0018190;Unigene0018191;Unigene0018320;Unigene0019617;Unigene0019618;Unigene0022165;Unigene00…	K01641+K01641+K01641+K01640+K01640+K01640+K01640+K09699+K09699+K00382+K00626+K00128+K00128+K00128+K00128+K00128+K07513+K07513+K00128+K00128+K05605+K05605+K00128+K00140+K00140+K00826+K07513+K00382+K05605+K05605+K00827+K00827+K00827+K00128+K00128+K07513+K07513+K07513+K07513+K00128+K01969+K01969+K01969+K05605+K05605+K05605+K05605+K05605+K05605+K00827+K00166+K00253+K00253+K00253+K00249+K00626+K14085+…
Metabolism	Metabolism of terpenoids and polyketides	Terpenoid backbone biosynthesis	80	ko00900	Unigene0000147;Unigene0000148;Unigene0000149;Unigene0001099;Unigene0002725;Unigene0002726;Unigene0002727;Unigene0003138;Unigene0003139;Unigene0003140;Unigene0007770;Unigene0008915;Unigene0008916;Unigene0008948;Unigene0009159;Unigene0009160;Unigene0009503;Unigene0009660;Unigene0009661;Unigene0009666;Unigene0009667;Unigene0012779;Unigene0012780;Unigene0017122;Unigene0017123;Unigene0018323;Unigene00…	K03527+K03527+K03527+K13789+K01641+K01641+K01641+K00021+K00021+K00021+K05906+K01662+K01662+K00626+K00938+K00938+K05955+K00869+K00869+K00587+K00587+K13789+K13789+K15889+K15889+K00919+K00919+K00919+K01823+K01823+K01823+K00021+K11778+K15892+K01823+K01823+K01823+K01662+K01662+K00099+K00991+K05356+K08658+K08658+K00787+K00787+K00787+K00787+K06013+K01597+K01597+K03527+K03527+K01662+K00021+K14066+K00021+…
Genetic Information Processing	Folding, sorting and degradation	Proteasome	78	ko03050	Unigene0003051;Unigene0003687;Unigene0003688;Unigene0005566;Unigene0006304;Unigene0006335;Unigene0006336;Unigene0006706;Unigene0007142;Unigene0007143;Unigene0007927;Unigene0007928;Unigene0009530;Unigene0009800;Unigene0009822;Unigene0009823;Unigene0009854;Unigene0011399;Unigene0011400;Unigene0011563;Unigene0011564;Unigene0011889;Unigene0011890;Unigene0012028;Unigene0012029;Unigene0013435;Unigene00…	K02734+K03029+K03029+K03066+K03065+K06700+K06700+K02736+K03029+K03029+K03062+K03062+K02727+K03032+K02732+K02732+K02731+K03062+K03062+K02738+K02738+K03038+K03038+K02737+K02737+K02739+K02739+K02731+K02730+K03063+K02726+K10881+K02735+K03039+K03039+K03028+K03038+K03038+K10881+K03035+K03035+K03035+K03035+K03035+K03035+K03035+K03030+K03030+K02725+K02729+K02729+K06700+K06699+K06699+K06699+K02734+K02728+…
Metabolism	Amino acid metabolism	Phenylalanine, tyrosine and tryptophan biosynthesis	76	ko00400	Unigene0001083;Unigene0001084;Unigene0002363;Unigene0002820;Unigene0002969;Unigene0002970;Unigene0004015;Unigene0004016;Unigene0004408;Unigene0005025;Unigene0006481;Unigene0006482;Unigene0007492;Unigene0009465;Unigene0009466;Unigene0009467;Unigene0012949;Unigene0017111;Unigene0020834;Unigene0021082;Unigene0021237;Unigene0021856;Unigene0021857;Unigene0022083;Unigene0023481;Unigene0023482;Unigene00…	K15227+K15227+K05359+K01696+K01735+K01735+K01609+K01609+K14455+K00811+K01696+K01696+K01817+K14454+K14454+K14454+K13832+K00815+K01736+K00766+K14455+K05359+K05359+K00815+K05359+K05359+K01626+K01626+K01626+K01695+K01695+K01695+K01850+K01850+K00815+K00815+K01626+K01658+K15849+K01850+K01850+K01850+K01626+K01626+K01850+K00800+K00817+K00817+K00817+K00891+K00815+K00815+K05359+K00891+K00891+K00891+K05359+…
Metabolism	Metabolism of cofactors and vitamins	Ubiquinone and other terpenoid-quinone biosynthesis	74	ko00130	Unigene0003462;Unigene0006514;Unigene0006515;Unigene0007738;Unigene0007739;Unigene0008973;Unigene0014612;Unigene0014613;Unigene0017111;Unigene0018628;Unigene0018629;Unigene0019703;Unigene0019704;Unigene0022083;Unigene0022614;Unigene0022823;Unigene0022824;Unigene0024230;Unigene0028370;Unigene0028371;Unigene0028799;Unigene0029191;Unigene0029192;Unigene0029193;Unigene0030332;Unigene0030447;Unigene00…	K01904+K12502+K12502+K01904+K01904+K03809+K03809+K03809+K00815+K01904+K01904+K01904+K01904+K00815+K09834+K05928+K05928+K12501+K00815+K00815+K03809+K00487+K00487+K00487+K06127+K00591+K06125+K06125+K12501+K12501+K03809+K14760+K06126+K06126+K00815+K00815+K02548+K02548+K02552+K02552+K01661+K01661+K01904+K01904+K03809+K14760+K14760+K01904+K01904+K01904+K01904+K01904+K01904+K14759+K14759+K14759+K00487+…
Metabolism	Amino acid metabolism	Tyrosine metabolism	74	ko00350	Unigene0001050;Unigene0004408;Unigene0005025;Unigene0006286;Unigene0009465;Unigene0009466;Unigene0009467;Unigene0010738;Unigene0010739;Unigene0010740;Unigene0014874;Unigene0015096;Unigene0016067;Unigene0016068;Unigene0017111;Unigene0017507;Unigene0017508;Unigene0017699;Unigene0017722;Unigene0017723;Unigene0019082;Unigene0019083;Unigene0019621;Unigene0021237;Unigene0022083;Unigene0024492;Unigene00…	K00422+K14455+K00811+K07253+K14454+K14454+K14454+K01800+K01800+K01800+K07253+K00422+K00276+K00276+K00815+K07253+K07253+K00276+K00121+K00121+K01800+K01800+K01555+K14455+K00815+K00276+K00276+K00815+K00815+K00001+K00001+K15849+K00451+K00451+K01800+K01592+K01592+K01592+K00276+K01557+K01557+K00817+K00817+K00817+K00815+K00815+K00121+K00121+K00121+K00121+K00121+K00121+K00121+K00121+K00121+K00121+K00121+…
Genetic Information Processing	Folding, sorting and degradation	Protein export	74	ko03060	Unigene0001188;Unigene0001280;Unigene0002826;Unigene0002827;Unigene0003554;Unigene0003555;Unigene0003741;Unigene0010156;Unigene0012862;Unigene0012969;Unigene0012970;Unigene0016460;Unigene0016461;Unigene0016462;Unigene0016871;Unigene0016872;Unigene0016873;Unigene0016874;Unigene0017129;Unigene0017660;Unigene0017661;Unigene0018021;Unigene0019290;Unigene0019291;Unigene0019299;Unigene0019300;Unigene00…	K13280+K03109+K13280+K13280+K03100+K03100+K12947+K09647+K03105+K03108+K03108+K09540+K09540+K09540+K12272+K12272+K12272+K12272+K09481+K09648+K09648+K03100+K12948+K12948+K09647+K09647+K09647+K12946+K12948+K12948+K09481+K13431+K03110+K03110+K03217+K03217+K03217+K13280+K13280+K07342+K03107+K03107+K03100+K03070+K03070+K03217+K03217+K03070+K03070+K03100+K03100+K09490+K09490+K03217+K03070+K12947+K10956+…
Metabolism	Carbohydrate metabolism	Pentose phosphate pathway	72	ko00030	Unigene0001059;Unigene0003487;Unigene0003488;Unigene0003557;Unigene0004023;Unigene0004024;Unigene0004076;Unigene0004077;Unigene0010048;Unigene0010679;Unigene0010680;Unigene0012200;Unigene0012201;Unigene0012509;Unigene0013205;Unigene0013391;Unigene0017006;Unigene0017007;Unigene0018100;Unigene0018402;Unigene0018403;Unigene0018734;Unigene0019522;Unigene0019732;Unigene0019734;Unigene0020062;Unigene00…	K00615+K01623+K01623+K01623+K01835+K01835+K01057+K01057+K00852+K01057+K01057+K00033+K00033+K01623+K00131+K01623+K03841+K03841+K00615+K01783+K01783+K01783+K00616+K00850+K00850+K00850+K00850+K00850+K00948+K00948+K01623+K01623+K03841+K03841+K00033+K01807+K01807+K00850+K00850+K00850+K01807+K01807+K01807+K01810+K00850+K00850+K00850+K00850+K00036+K00036+K00033+K00033+K01057+K00036+K00036+K00616+K00616+…
Metabolism	Glycan biosynthesis and metabolism	N-Glycan biosynthesis	71	ko00510	Unigene0000928;Unigene0000929;Unigene0000995;Unigene0000996;Unigene0003987;Unigene0004589;Unigene0004590;Unigene0004591;Unigene0004592;Unigene0007862;Unigene0008084;Unigene0010879;Unigene0010880;Unigene0011141;Unigene0012378;Unigene0012379;Unigene0014383;Unigene0018528;Unigene0018529;Unigene0018760;Unigene0018761;Unigene0018762;Unigene0023522;Unigene0023523;Unigene0024636;Unigene0024637;Unigene00…	K12668+K12668+K12669+K12669+K01231+K07151+K07151+K01230+K01230+K09659+K01001+K07151+K07151+K12666+K00737+K00737+K09658+K12666+K12666+K12667+K12667+K12667+K12670+K12670+K07441+K07441+K03846+K03846+K03846+K00729+K00721+K00721+K01001+K01001+K01001+K03850+K03850+K03843+K01230+K01230+K01230+K07432+K07432+K00902+K00729+K03844+K03844+K00726+K03849+K03845+K03845+K03845+K03845+K03845+K01228+K01228+K00736+…
Metabolism	Metabolism of cofactors and vitamins	Porphyrin and chlorophyll metabolism	71	ko00860	Unigene0000662;Unigene0000663;Unigene0000798;Unigene0002898;Unigene0002899;Unigene0003235;Unigene0003236;Unigene0003500;Unigene0004017;Unigene0005429;Unigene0005430;Unigene0007633;Unigene0008635;Unigene0009355;Unigene0009356;Unigene0009876;Unigene0011845;Unigene0011846;Unigene0011847;Unigene0013457;Unigene0014787;Unigene0014788;Unigene0015930;Unigene0018004;Unigene0018005;Unigene0018042;Unigene00…	K00510+K00510+K13545+K01885+K01885+K08099+K08099+K04040+K02495+K02257+K02257+K00228+K03403+K00218+K00218+K01845+K08099+K08099+K08099+K00218+K02495+K02495+K01749+K00510+K00510+K01599+K01599+K02492+K02492+K02492+K02492+K01885+K01772+K01599+K01599+K01599+K04035+K04035+K01719+K01719+K00231+K00231+K13606+K13606+K02259+K02259+K13600+K08101+K08101+K08101+K03404+K03404+K13071+K19054+K19054+K19054+K19054+…
Metabolism	Lipid metabolism	Fatty acid degradation	71	ko00071	Unigene0007721;Unigene0007722;Unigene0007723;Unigene0008948;Unigene0009719;Unigene0009720;Unigene0009721;Unigene0009739;Unigene0009740;Unigene0012437;Unigene0012438;Unigene0012439;Unigene0012440;Unigene0012441;Unigene0014792;Unigene0014793;Unigene0015755;Unigene0015756;Unigene0016786;Unigene0017572;Unigene0017573;Unigene0017574;Unigene0017722;Unigene0017723;Unigene0018320;Unigene0022132;Unigene00…	K10527+K10527+K10527+K00626+K00128+K00128+K00128+K00128+K00128+K01897+K01897+K01897+K01897+K01897+K07513+K07513+K00128+K00128+K00232+K01897+K01897+K01897+K00121+K00121+K00128+K10527+K01897+K01897+K01897+K07513+K01897+K01897+K00128+K00128+K07513+K07513+K07513+K07513+K01897+K00128+K00001+K00001+K01897+K01897+K00232+K00249+K00626+K14085+K01897+K00121+K00121+K00121+K00128+K00121+K00121+K00121+K00121+…
Genetic Information Processing	Transcription	Basal transcription factors	70	ko03022	Unigene0006182;Unigene0009760;Unigene0013862;Unigene0013863;Unigene0014333;Unigene0015618;Unigene0017342;Unigene0017343;Unigene0018243;Unigene0018247;Unigene0022385;Unigene0022386;Unigene0022387;Unigene0023098;Unigene0024144;Unigene0024145;Unigene0024146;Unigene0024990;Unigene0025224;Unigene0026092;Unigene0026309;Unigene0026543;Unigene0027568;Unigene0027569;Unigene0027571;Unigene0030268;Unigene00…	K03136+K03136+K03139+K03139+K02202+K03136+K10843+K10843+K03122+K03122+K14649+K14649+K14649+K03126+K03134+K03134+K03134+K14649+K03142+K10844+K03133+K03132+K03138+K03138+K03138+K03123+K03127+K03127+K03144+K03144+K03144+K03136+K03129+K03129+K03124+K03125+K03125+K03131+K03131+K03139+K03139+K03131+K03141+K03137+K14649+K14649+K14649+K03128+K03128+K03130+K03130+K10842+K10842+K10845+K03120+K06634+K03143+…
Metabolism	Metabolism of other amino acids	Cyanoamino acid metabolism	69	ko00460	Unigene0005726;Unigene0005727;Unigene0008474;Unigene0008545;Unigene0009808;Unigene0009809;Unigene0012827;Unigene0015262;Unigene0015839;Unigene0015840;Unigene0015853;Unigene0016585;Unigene0016586;Unigene0016884;Unigene0016885;Unigene0016886;Unigene0016887;Unigene0019393;Unigene0022120;Unigene0023467;Unigene0023783;Unigene0023784;Unigene0025208;Unigene0028186;Unigene0028187;Unigene0028188;Unigene00…	K01188+K01188+K00600+K01188+K00600+K00600+K08248+K05349+K13035+K13035+K05350+K08248+K08248+K01188+K01188+K01188+K01188+K01188+K05350+K00600+K00600+K00600+K05349+K01188+K01188+K01188+K01188+K01188+K05350+K05350+K05350+K18592+K00600+K00600+K00600+K00600+K00600+K05349+K05349+K00600+K05350+K05350+K13034+K05349+K05349+K05350+K05350+K01188+K01188+K01188+K01188+K01188+K01188+K01188+K01188+K01188+K01188+…
Metabolism	Global and Overview	2-Oxocarboxylic acid metabolism	68	ko01210	Unigene0003434;Unigene0003685;Unigene0004408;Unigene0005025;Unigene0005817;Unigene0005818;Unigene0007755;Unigene0008856;Unigene0008857;Unigene0008858;Unigene0009465;Unigene0009466;Unigene0009467;Unigene0013182;Unigene0013183;Unigene0014361;Unigene0017773;Unigene0021237;Unigene0021314;Unigene0021324;Unigene0022165;Unigene0022926;Unigene0022927;Unigene0024064;Unigene0024065;Unigene0024599;Unigene00…	K00930+K01681+K14455+K00811+K00053+K00053+K01653+K01703+K01703+K01703+K14454+K14454+K14454+K01649+K01649+K00030+K00030+K14455+K01653+K00818+K00826+K00814+K00814+K00928+K00928+K14677+K14677+K14677+K00031+K00814+K00814+K00814+K01647+K01681+K01647+K01649+K01649+K00620+K00620+K00620+K00620+K00031+K00031+K14677+K14682+K14272+K14272+K14272+K01681+K01681+K01681+K00052+K00052+K00145+K00145+K00826+K00826+…
Metabolism	Carbohydrate metabolism	Citrate cycle (TCA cycle)	67	ko00020	Unigene0001830;Unigene0001831;Unigene0003685;Unigene0007708;Unigene0007709;Unigene0007710;Unigene0007911;Unigene0008097;Unigene0009359;Unigene0009360;Unigene0009371;Unigene0009372;Unigene0014361;Unigene0016064;Unigene0016065;Unigene0016066;Unigene0016811;Unigene0016812;Unigene0016988;Unigene0017260;Unigene0017773;Unigene0023526;Unigene0023856;Unigene0024524;Unigene0025935;Unigene0026343;Unigene00…	K01610+K01610+K01681+K00234+K00234+K00234+K00382+K00162+K01679+K01679+K01610+K01610+K00030+K00627+K00627+K00627+K01900+K01900+K01899+K00026+K00030+K01648+K00025+K00382+K00627+K00627+K00627+K00026+K01648+K01648+K00031+K00236+K00236+K01647+K01681+K00162+K01647+K00658+K00658+K00031+K00031+K01648+K01648+K01648+K01648+K01648+K00164+K00164+K00164+K00164+K01681+K01681+K01681+K01648+K00627+K01610+K00658+…
Metabolism	Carbohydrate metabolism	Ascorbate and aldarate metabolism	66	ko00053	Unigene0005778;Unigene0005779;Unigene0008373;Unigene0009719;Unigene0009720;Unigene0009721;Unigene0009739;Unigene0009740;Unigene0009886;Unigene0011985;Unigene0011986;Unigene0011987;Unigene0013810;Unigene0013811;Unigene0015097;Unigene0015098;Unigene0015755;Unigene0015756;Unigene0016050;Unigene0016051;Unigene0016552;Unigene0016553;Unigene0017976;Unigene0017977;Unigene0018320;Unigene0020477;Unigene00…	K00225+K00225+K10046+K00128+K00128+K00128+K00128+K00128+K00469+K00012+K00012+K00012+K10047+K10047+K08232+K08232+K00128+K00128+K16190+K16190+K00012+K00012+K00012+K00012+K00128+K17744+K14190+K14190+K00434+K00128+K00128+K00128+K00434+K00434+K08232+K00434+K00434+K00434+K08232+K10047+K10047+K14085+K00469+K18649+K18649+K00434+K00434+K00128+K00469+K00434+K00434+K00423+K00423+K00423+K00423+K12447+K14190+…
Cellular Processes	Transport and catabolism	Regulation of autophagy	65	ko04140	Unigene0002372;Unigene0007156;Unigene0013123;Unigene0013124;Unigene0013675;Unigene0013676;Unigene0013677;Unigene0016554;Unigene0016555;Unigene0016654;Unigene0016655;Unigene0017094;Unigene0017095;Unigene0017096;Unigene0020260;Unigene0021882;Unigene0021883;Unigene0022195;Unigene0025576;Unigene0025577;Unigene0027630;Unigene0027869;Unigene0029868;Unigene0029870;Unigene0030923;Unigene0030924;Unigene00…	K08332+K08332+K07198+K07198+K08332+K08332+K08332+K07198+K07198+K08331+K08331+K08341+K08341+K08341+K07198+K08341+K08341+K07198+K08341+K08341+K08341+K07198+K07198+K07198+K08341+K08341+K08341+K08332+K08337+K08269+K08269+K08342+K08342+K08336+K08332+K17890+K08343+K08343+K00914+K00914+K08334+K08334+K08339+K08339+K08339+K08339+K07198+K08269+K08269+K08269+K08269+K07198+K17888+K07198+K08333+K08333+K08341+…
Metabolism	Amino acid metabolism	Arginine biosynthesis	64	ko00220	Unigene0003434;Unigene0004408;Unigene0005025;Unigene0009347;Unigene0009348;Unigene0009349;Unigene0009465;Unigene0009466;Unigene0009467;Unigene0020846;Unigene0021237;Unigene0021324;Unigene0022926;Unigene0022927;Unigene0024599;Unigene0025875;Unigene0025876;Unigene0026051;Unigene0026052;Unigene0026319;Unigene0026320;Unigene0026321;Unigene0026527;Unigene0026528;Unigene0026829;Unigene0026830;Unigene00…	K00930+K14455+K00811+K00261+K00261+K00261+K14454+K14454+K14454+K01476+K14455+K00818+K00814+K00814+K14677+K14677+K14677+K00261+K00261+K00262+K00262+K00262+K01755+K01755+K01915+K01915+K01915+K01915+K00814+K00814+K00814+K00620+K00620+K00620+K00620+K14677+K01915+K01915+K01940+K01940+K14682+K00261+K01427+K01427+K01427+K14272+K14272+K14272+K00145+K00145+K01438+K13427+K00611+K01427+K01427+K01427+K01427+…
Genetic Information Processing	Folding, sorting and degradation	SNARE interactions in vesicular transport	62	ko04130	Unigene0001955;Unigene0001956;Unigene0003390;Unigene0003391;Unigene0005230;Unigene0005231;Unigene0005561;Unigene0005644;Unigene0005645;Unigene0006533;Unigene0006534;Unigene0006535;Unigene0006732;Unigene0006733;Unigene0006734;Unigene0007625;Unigene0007626;Unigene0014421;Unigene0014422;Unigene0015210;Unigene0017068;Unigene0017164;Unigene0017165;Unigene0018598;Unigene0018599;Unigene0019905;Unigene00…	K08486+K08486+K08503+K08503+K08486+K08486+K08515+K08517+K08517+K08489+K08489+K08489+K08490+K08490+K08490+K08486+K08486+K08486+K08486+K08486+K08495+K08517+K08517+K08486+K08486+K08516+K08516+K08516+K08505+K08505+K08493+K08493+K08503+K08493+K08504+K08504+K08486+K08486+K08490+K08504+K08504+K08504+K08517+K08517+K08486+K08486+K08486+K08498+K08495+K08507+K08507+K08489+K08492+K08497+K08496+K08488+K08488+…
Metabolism	Amino acid metabolism	Tryptophan metabolism	61	ko00380	Unigene0000068;Unigene0000355;Unigene0000356;Unigene0000357;Unigene0001015;Unigene0001016;Unigene0003338;Unigene0004419;Unigene0008282;Unigene0008283;Unigene0008284;Unigene0008285;Unigene0008948;Unigene0009719;Unigene0009720;Unigene0009721;Unigene0009739;Unigene0009740;Unigene0010590;Unigene0010591;Unigene0010592;Unigene0015692;Unigene0015693;Unigene0015755;Unigene0015756;Unigene0016483;Unigene00…	K11816+K01426+K01426+K01426+K11816+K11816+K11816+K01426+K11816+K11816+K11816+K11816+K00626+K00128+K00128+K00128+K00128+K00128+K11816+K11816+K11816+K16903+K16903+K00128+K00128+K01426+K01426+K01426+K01426+K01426+K00128+K01426+K00128+K00128+K00128+K01426+K01426+K01426+K01426+K03781+K03781+K03781+K00626+K14085+K01426+K03781+K03781+K00164+K00164+K00164+K00164+K00128+K01426+K11817+K01426+K14085+K11816+…
Metabolism	Metabolism of other amino acids	beta-Alanine metabolism	61	ko00410	Unigene0000953;Unigene0000954;Unigene0003726;Unigene0003727;Unigene0009719;Unigene0009720;Unigene0009721;Unigene0009739;Unigene0009740;Unigene0015750;Unigene0015755;Unigene0015756;Unigene0016052;Unigene0016053;Unigene0016067;Unigene0016068;Unigene0017699;Unigene0018190;Unigene0018191;Unigene0018320;Unigene0019617;Unigene0019618;Unigene0022251;Unigene0024492;Unigene0024493;Unigene0024539;Unigene00…	K01918+K01918+K12259+K12259+K00128+K00128+K00128+K00128+K00128+K00207+K00128+K00128+K01580+K01580+K00276+K00276+K00276+K05605+K05605+K00128+K00140+K00140+K13366+K00276+K00276+K05605+K05605+K01580+K00128+K00128+K00128+K00797+K05605+K05605+K05605+K05605+K05605+K05605+K00797+K00797+K00249+K01578+K00276+K14085+K00797+K00797+K00797+K17839+K17839+K17839+K17839+K05605+K00128+K01464+K00140+K01580+K01580+…
Organismal Systems	Environmental adaptation	Circadian rhythm - plant	60	ko04712	Unigene0002812;Unigene0005814;Unigene0005815;Unigene0006792;Unigene0006793;Unigene0008287;Unigene0010458;Unigene0010459;Unigene0017166;Unigene0017167;Unigene0018571;Unigene0018572;Unigene0018926;Unigene0018927;Unigene0018928;Unigene0018929;Unigene0019154;Unigene0019155;Unigene0020049;Unigene0022320;Unigene0022321;Unigene0024130;Unigene0024131;Unigene0025857;Unigene0026073;Unigene0026074;Unigene00…	K00660+K16223+K16223+K12118+K12118+K00660+K16241+K16241+K10143+K10143+K16241+K16241+K12116+K12116+K12116+K12116+K12125+K12125+K03115+K03097+K03097+K16240+K16240+K12120+K12127+K12127+K12124+K12120+K12120+K12125+K12125+K12129+K12130+K12130+K12130+K12130+K12127+K12127+K12127+K12127+K03115+K10143+K12124+K12124+K12124+K03097+K03097+K03097+K12121+K12121+K12126+K12133+K12119+K12119+K03097+K12130+K12130+…
Metabolism	Lipid metabolism	Fatty acid biosynthesis	59	ko00061	Unigene0001883;Unigene0002548;Unigene0002549;Unigene0003232;Unigene0003233;Unigene0004538;Unigene0004539;Unigene0008526;Unigene0008661;Unigene0012437;Unigene0012438;Unigene0012439;Unigene0012440;Unigene0012441;Unigene0012824;Unigene0012825;Unigene0014295;Unigene0014296;Unigene0014882;Unigene0014883;Unigene0016240;Unigene0017572;Unigene0017573;Unigene0017574;Unigene0017822;Unigene0019123;Unigene00…	K01963+K10781+K10781+K10782+K10782+K00059+K00059+K00059+K09458+K01897+K01897+K01897+K01897+K01897+K00208+K00208+K00059+K00059+K02160+K02160+K03921+K01897+K01897+K01897+K00059+K03921+K03921+K01897+K01897+K01897+K01962+K01962+K01962+K01897+K01897+K09458+K01962+K01962+K00648+K01897+K01897+K00059+K01897+K10781+K10781+K10781+K10781+K00645+K00645+K02160+K03921+K01897+K11262+K09458+K10781+K10781+K09458+…
Genetic Information Processing	Transcription	RNA polymerase	57	ko03020	Unigene0000931;Unigene0001539;Unigene0001882;Unigene0001889;Unigene0001890;Unigene0004129;Unigene0005840;Unigene0007325;Unigene0007326;Unigene0007527;Unigene0007528;Unigene0012290;Unigene0014703;Unigene0016042;Unigene0016043;Unigene0016044;Unigene0017696;Unigene0017858;Unigene0017859;Unigene0017861;Unigene0018034;Unigene0018035;Unigene0020038;Unigene0020039;Unigene0021564;Unigene0022506;Unigene00…	K03013+K03046+K03005+K03025+K03025+K03014+K03046+K03020+K03020+K03008+K03008+K03017+K03008+K03011+K03011+K03011+K03009+K03000+K03000+K03000+K03016+K03016+K03007+K03007+K03046+K03002+K03002+K02999+K03026+K14721+K03010+K03010+K03040+K03024+K03027+K03018+K03018+K03026+K03013+K03012+K03021+K03021+K03023+K03023+K03023+K03023+K03012+K03006+K03015+K03019+K03022+K03043+K03013+K14721+K14721+K03025+K03016
Metabolism	Lipid metabolism	Biosynthesis of unsaturated fatty acids	56	ko01040	Unigene0000354;Unigene0001919;Unigene0002933;Unigene0004538;Unigene0004539;Unigene0008526;Unigene0008837;Unigene0013825;Unigene0014295;Unigene0014296;Unigene0014508;Unigene0014509;Unigene0014510;Unigene0014792;Unigene0014793;Unigene0015252;Unigene0016240;Unigene0016786;Unigene0017771;Unigene0017772;Unigene0017822;Unigene0019123;Unigene0019124;Unigene0022598;Unigene0022599;Unigene0024035;Unigene00…	K00507+K00507+K10256+K00059+K00059+K00059+K10258+K10258+K00059+K00059+K00507+K00507+K00507+K07513+K07513+K10703+K03921+K00232+K00507+K00507+K00059+K03921+K03921+K00507+K00507+K07513+K07513+K07513+K07513+K07513+K10255+K00059+K00232+K10257+K03921+K10257+K00507+K01068+K01068+K10703+K00232+K00232+K10251+K10258+K10258+K10256+K10703+K10703+K10703+K10251+K07513+K10258+K00232+K00507+K10258+K10258
Metabolism	Energy metabolism	Sulfur metabolism	54	ko00920	Unigene0005387;Unigene0005388;Unigene0006144;Unigene0006145;Unigene0006698;Unigene0006699;Unigene0006926;Unigene0006927;Unigene0012431;Unigene0014034;Unigene0014564;Unigene0014565;Unigene0015905;Unigene0015906;Unigene0016843;Unigene0016844;Unigene0018070;Unigene0018071;Unigene0019745;Unigene0019746;Unigene0020808;Unigene0020809;Unigene0020810;Unigene0022123;Unigene0024490;Unigene0026288;Unigene00…	K05907+K05907+K00392+K00392+K01082+K01082+K13811+K13811+K15422+K00640+K01739+K01739+K00640+K00640+K01738+K01738+K17725+K17725+K01082+K01082+K08738+K08738+K08738+K01738+K00640+K01082+K13811+K13811+K13811+K01011+K13034+K00387+K00387+K00860+K01738+K01738+K00860+K01738+K01738+K00392+K00392+K00392+K05907+K01738+K01738+K01738+K01738+K01738+K01738+K01738+K01738+K01738+K05907+K00860
Metabolism	Lipid metabolism	Fatty acid elongation	52	ko00062	Unigene0004159;Unigene0004407;Unigene0008217;Unigene0008837;Unigene0010755;Unigene0010818;Unigene0010876;Unigene0010877;Unigene0010878;Unigene0012269;Unigene0012270;Unigene0013825;Unigene0015252;Unigene0017107;Unigene0017108;Unigene0017688;Unigene0017689;Unigene0018863;Unigene0020824;Unigene0020825;Unigene0020826;Unigene0020827;Unigene0020828;Unigene0020829;Unigene0020830;Unigene0022505;Unigene00…	K15397+K15397+K18880+K10258+K01074+K15397+K15397+K15397+K15397+K15397+K15397+K10258+K10703+K15397+K15397+K15397+K15397+K15397+K15397+K15397+K15397+K15397+K15397+K15397+K15397+K15397+K18880+K15397+K15397+K07512+K07512+K07512+K07512+K01068+K01068+K01074+K01074+K10703+K10251+K10258+K10258+K10703+K10703+K10703+K10249+K10251+K15397+K10258+K15397+K01074+K10258+K10258
Metabolism	Lipid metabolism	Sphingolipid metabolism	52	ko00600	Unigene0012559;Unigene0012800;Unigene0012801;Unigene0014076;Unigene0014125;Unigene0014126;Unigene0014127;Unigene0014128;Unigene0016055;Unigene0016056;Unigene0020604;Unigene0022934;Unigene0022935;Unigene0024123;Unigene0024124;Unigene0025374;Unigene0025455;Unigene0025887;Unigene0025888;Unigene0027108;Unigene0027216;Unigene0027217;Unigene0028735;Unigene0028736;Unigene0028737;Unigene0029748;Unigene00…	K17108+K04712+K04712+K07407+K04712+K04712+K04712+K04712+K04712+K04712+K04711+K04710+K04710+K04713+K04713+K04708+K17108+K07407+K07407+K00654+K00654+K00654+K17108+K17108+K17108+K07407+K07407+K07407+K07407+K01190+K12349+K12349+K12349+K07407+K07407+K07407+K01634+K12309+K12309+K04715+K04715+K04710+K04710+K04718+K04718+K12349+K12309+K04716+K12309+K04711+K04713+K04713
Metabolism	Metabolism of terpenoids and polyketides	Carotenoid biosynthesis	47	ko00906	Unigene0000047;Unigene0001707;Unigene0001708;Unigene0003752;Unigene0004338;Unigene0005996;Unigene0005997;Unigene0008882;Unigene0008883;Unigene0009474;Unigene0009475;Unigene0009476;Unigene0010058;Unigene0010059;Unigene0010060;Unigene0010434;Unigene0010859;Unigene0011894;Unigene0011895;Unigene0011896;Unigene0012523;Unigene0013003;Unigene0013004;Unigene0014210;Unigene0018274;Unigene0018275;Unigene00…	K14595+K09843+K09843+K09843+K09841+K17913+K17913+K06444+K06444+K09840+K09840+K09840+K00514+K00514+K00514+K15744+K09840+K09843+K09843+K09843+K09838+K15746+K15746+K09839+K14593+K14593+K14593+K02293+K06443+K06443+K02291+K02291+K15747+K09843+K09843+K15746+K09837+K09837+K09837+K02291+K09835+K09835+K09840+K17911+K02291+K09843+K09840
Metabolism	Glycan biosynthesis and metabolism	Other glycan degradation	47	ko00511	Unigene0004550;Unigene0006694;Unigene0006696;Unigene0006697;Unigene0008789;Unigene0008845;Unigene0008846;Unigene0009670;Unigene0012559;Unigene0013374;Unigene0017435;Unigene0017436;Unigene0020869;Unigene0021627;Unigene0025455;Unigene0028735;Unigene0028736;Unigene0028737;Unigene0029563;Unigene0029564;Unigene0029565;Unigene0030326;Unigene0032992;Unigene0035663;Unigene0036011;Unigene0036014;Unigene00…	K01191+K01191+K01191+K01191+K01191+K12373+K12373+K01206+K17108+K01191+K12373+K12373+K01206+K01206+K17108+K17108+K17108+K17108+K12373+K12373+K12373+K01190+K01191+K01444+K12309+K12309+K15923+K15923+K15923+K15923+K15923+K12309+K01191+K01191+K01191+K01227+K01227+K01227+K01227+K12373+K12373+K12373+K01191+K12309+K01191+K01191+K01191
Metabolism	Lipid metabolism	Steroid biosynthesis	46	ko00100	Unigene0007393;Unigene0010594;Unigene0010595;Unigene0011422;Unigene0015941;Unigene0015942;Unigene0021434;Unigene0022737;Unigene0023695;Unigene0023696;Unigene0023718;Unigene0025112;Unigene0026995;Unigene0029296;Unigene0031239;Unigene0032520;Unigene0032521;Unigene0032522;Unigene0032523;Unigene0032935;Unigene0033104;Unigene0033105;Unigene0033528;Unigene0033529;Unigene0035264;Unigene0035265;Unigene00…	K14424+K01824+K01824+K14423+K00801+K00801+K14674+K07748+K08246+K08246+K00511+K08242+K00222+K00511+K00511+K00559+K00559+K00559+K00559+K01853+K00227+K00227+K01052+K01052+K09828+K09828+K09828+K01052+K01052+K01052+K07748+K07748+K01052+K01052+K09828+K09828+K05917+K05917+K00213+K01853+K01853+K00511+K00511+K00511+K00559+K09832
Metabolism	Carbohydrate metabolism	Propanoate metabolism	44	ko00640	Unigene0001883;Unigene0007589;Unigene0007590;Unigene0007911;Unigene0008948;Unigene0014882;Unigene0014883;Unigene0016811;Unigene0016812;Unigene0016988;Unigene0018190;Unigene0018191;Unigene0019617;Unigene0019618;Unigene0023959;Unigene0023960;Unigene0023961;Unigene0024524;Unigene0024539;Unigene0024540;Unigene0026536;Unigene0026537;Unigene0026770;Unigene0026771;Unigene0028665;Unigene0028666;Unigene00…	K01963+K09699+K09699+K00382+K00626+K02160+K02160+K01900+K01900+K01899+K05605+K05605+K00140+K00140+K01962+K01962+K01962+K00382+K05605+K05605+K01962+K01962+K01895+K01895+K05605+K05605+K05605+K05605+K05605+K05605+K00166+K00249+K01578+K02160+K00626+K11262+K05605+K00167+K00166+K00166+K01961+K00140+K00382+K00016
Metabolism	Amino acid metabolism	Lysine degradation	41	ko00310	Unigene0008948;Unigene0009719;Unigene0009720;Unigene0009721;Unigene0009739;Unigene0009740;Unigene0011378;Unigene0011379;Unigene0015755;Unigene0015756;Unigene0018320;Unigene0025330;Unigene0025441;Unigene0026453;Unigene0026454;Unigene0026685;Unigene0026686;Unigene0026687;Unigene0027605;Unigene0027606;Unigene0027714;Unigene0027890;Unigene0029372;Unigene0031411;Unigene0031413;Unigene0034397;Unigene00…	K00626+K00128+K00128+K00128+K00128+K00128+K00306+K00306+K00128+K00128+K00128+K11420+K11433+K00128+K00128+K11420+K11420+K11420+K11423+K11423+K11423+K00128+K11420+K00658+K00658+K00626+K14085+K14157+K11420+K00164+K00164+K00164+K00164+K00128+K18826+K11423+K11423+K00658+K00658+K14085+K14085
Metabolism	Lipid metabolism	Linoleic acid metabolism	40	ko00591	Unigene0002469;Unigene0013921;Unigene0013922;Unigene0021434;Unigene0025454;Unigene0030356;Unigene0030357;Unigene0031744;Unigene0031745;Unigene0031746;Unigene0031747;Unigene0036231;Unigene0036232;Unigene0036233;Unigene0038338;Unigene0038339;Unigene0038340;Unigene0039561;Unigene0044313;Unigene0044694;Unigene0044695;Unigene0044696;Unigene0044697;Unigene0044698;Unigene0044699;Unigene0046529;Unigene00…	K00454+K15718+K15718+K14674+K00454+K01047+K01047+K15718+K15718+K15718+K15718+K00454+K00454+K00454+K00454+K00454+K00454+K15718+K00454+K00454+K00454+K00454+K00454+K00454+K00454+K15718+K15718+K15718+K15718+K15718+K07424+K00454+K00454+K00454+K00454+K00454+K00454+K00454+K00454+K00454
Metabolism	Lipid metabolism	Ether lipid metabolism	39	ko00565	Unigene0003628;Unigene0007189;Unigene0008819;Unigene0008820;Unigene0008821;Unigene0009299;Unigene0009300;Unigene0009301;Unigene0012003;Unigene0014254;Unigene0015767;Unigene0018423;Unigene0018424;Unigene0019427;Unigene0019428;Unigene0019429;Unigene0021434;Unigene0025962;Unigene0025963;Unigene0028135;Unigene0030356;Unigene0030357;Unigene0032603;Unigene0032604;Unigene0033340;Unigene0033947;Unigene00…	K01115+K13519+K01115+K01115+K01115+K01115+K01115+K01115+K01115+K16794+K01115+K01114+K01114+K16860+K16860+K16860+K14674+K01115+K01115+K00993+K01047+K01047+K01115+K01115+K01115+K13510+K13510+K13510+K13510+K01115+K01114+K01115+K01115+K00993+K00993+K01115+K01114+K01114+K01115
Metabolism	Biosynthesis of other secondary metabolites	Isoquinoline alkaloid biosynthesis	37	ko00950	Unigene0001033;Unigene0001050;Unigene0004408;Unigene0005025;Unigene0009465;Unigene0009466;Unigene0009467;Unigene0015096;Unigene0016067;Unigene0016068;Unigene0017111;Unigene0017699;Unigene0018460;Unigene0018461;Unigene0021237;Unigene0022083;Unigene0024492;Unigene0024493;Unigene0028370;Unigene0028371;Unigene0029171;Unigene0033439;Unigene0033440;Unigene0033441;Unigene0034234;Unigene0036096;Unigene00…	K13384+K00422+K14455+K00811+K14454+K14454+K14454+K00422+K00276+K00276+K00815+K00276+K13384+K13384+K14455+K00815+K00276+K00276+K00815+K00815+K15849+K01592+K01592+K01592+K00276+K00815+K00815+K00422+K00422+K00422+K00815+K01592+K00422+K00422+K01592+K00815+K00422
Metabolism	Energy metabolism	Nitrogen metabolism	37	ko00910	Unigene0001322;Unigene0006444;Unigene0006445;Unigene0007683;Unigene0007684;Unigene0009347;Unigene0009348;Unigene0009349;Unigene0015758;Unigene0017344;Unigene0018747;Unigene0020796;Unigene0020797;Unigene0020798;Unigene0026051;Unigene0026052;Unigene0026319;Unigene0026320;Unigene0026321;Unigene0026829;Unigene0026830;Unigene0028849;Unigene0028850;Unigene0030492;Unigene0030493;Unigene0030857;Unigene00…	K10534+K02575+K02575+K01674+K01674+K00261+K00261+K00261+K10534+K01674+K01673+K01674+K01674+K01674+K00261+K00261+K00262+K00262+K00262+K01915+K01915+K01915+K01915+K00264+K00264+K01725+K00284+K00284+K01915+K01915+K00261+K01673+K00366+K01915+K01915+K01674+K01674
Metabolism	Glycan biosynthesis and metabolism	Glycosylphosphatidylinositol(GPI)-anchor biosynthesis	36	ko00563	Unigene0002593;Unigene0002854;Unigene0014383;Unigene0024988;Unigene0029344;Unigene0029345;Unigene0029346;Unigene0029737;Unigene0029738;Unigene0029739;Unigene0029788;Unigene0031564;Unigene0031565;Unigene0032391;Unigene0032392;Unigene0034287;Unigene0034288;Unigene0034289;Unigene0034290;Unigene0034291;Unigene0035362;Unigene0035529;Unigene0035691;Unigene0036284;Unigene0036285;Unigene0036286;Unigene00…	K05292+K05290+K09658+K11001+K05291+K05291+K05291+K05289+K05289+K05289+K03859+K07542+K07542+K05286+K05286+K05288+K05288+K05288+K05288+K05288+K03434+K03858+K03860+K05310+K05310+K05310+K05284+K05287+K03857+K05293+K05290+K05283+K07541+K03861+K03860+K03860
Metabolism	Metabolism of cofactors and vitamins	Pantothenate and CoA biosynthesis	34	ko00770	Unigene0000953;Unigene0000954;Unigene0005817;Unigene0005818;Unigene0007755;Unigene0009790;Unigene0012856;Unigene0012857;Unigene0015750;Unigene0021314;Unigene0022165;Unigene0025770;Unigene0025771;Unigene0027104;Unigene0027935;Unigene0027936;Unigene0034953;Unigene0034954;Unigene0034955;Unigene0037983;Unigene0037984;Unigene0040899;Unigene0040900;Unigene0041921;Unigene0042825;Unigene0042826;Unigene00…	K01918+K01918+K00053+K00053+K01653+K01513+K01598+K01598+K00207+K01653+K00826+K06133+K06133+K00859+K00606+K00606+K06133+K06133+K06133+K09680+K09680+K09680+K09680+K01922+K00826+K00826+K01464+K01687+K01687+K02201+K01652+K01431+K01431+K01652
Metabolism	Biosynthesis of other secondary metabolites	Stilbenoid, diarylheptanoid and gingerol biosynthesis	33	ko00945	Unigene0001141;Unigene0002009;Unigene0005580;Unigene0005581;Unigene0005861;Unigene0019404;Unigene0019560;Unigene0019561;Unigene0019562;Unigene0019563;Unigene0023187;Unigene0023188;Unigene0024972;Unigene0029191;Unigene0029192;Unigene0029193;Unigene0029986;Unigene0029993;Unigene0031940;Unigene0034553;Unigene0038194;Unigene0038381;Unigene0038382;Unigene0039230;Unigene0042269;Unigene0046714;Unigene00…	K00517+K00517+K00588+K00588+K00517+K00517+K00517+K00517+K00517+K00517+K09754+K09754+K00517+K00487+K00487+K00487+K00517+K00517+K00517+K13065+K00588+K13065+K13065+K13065+K00517+K00487+K00487+K00487+K00487+K00517+K00487+K00588+K00588
Metabolism	Metabolism of terpenoids and polyketides	Zeatin biosynthesis	32	ko00908	Unigene0003264;Unigene0004612;Unigene0006574;Unigene0008581;Unigene0011735;Unigene0011736;Unigene0013826;Unigene0013827;Unigene0013828;Unigene0013829;Unigene0013830;Unigene0013834;Unigene0018498;Unigene0018499;Unigene0018551;Unigene0018552;Unigene0018553;Unigene0026997;Unigene0030693;Unigene0030694;Unigene0030696;Unigene0030697;Unigene0030698;Unigene0031444;Unigene0036395;Unigene0038906;Unigene00…	K13495+K00279+K10760+K00279+K00279+K00279+K00279+K00279+K00279+K00279+K00279+K10717+K00279+K00279+K00279+K00279+K00279+K00279+K00279+K00279+K00279+K00279+K00279+K00791+K00791+K10760+K00279+K13495+K00279+K10760+K00279+K00279
Metabolism	Biosynthesis of other secondary metabolites	Flavonoid biosynthesis	32	ko00941	Unigene0002812;Unigene0004578;Unigene0005580;Unigene0005581;Unigene0006284;Unigene0006285;Unigene0008287;Unigene0015775;Unigene0015776;Unigene0019959;Unigene0019960;Unigene0019961;Unigene0023187;Unigene0023188;Unigene0029191;Unigene0029192;Unigene0029193;Unigene0034553;Unigene0038194;Unigene0038381;Unigene0038382;Unigene0039230;Unigene0046714;Unigene0046715;Unigene0046716;Unigene0046717;Unigene00…	K00660+K05280+K00588+K00588+K05278+K05278+K00660+K00475+K00475+K01859+K01859+K01859+K09754+K09754+K00487+K00487+K00487+K13065+K00588+K13065+K13065+K13065+K00487+K00487+K00487+K00487+K00487+K05280+K00660+K00588+K00588+K00660
Metabolism	Metabolism of other amino acids	Selenocompound metabolism	32	ko00450	Unigene0004329;Unigene0006150;Unigene0006151;Unigene0006926;Unigene0006927;Unigene0010215;Unigene0014564;Unigene0014565;Unigene0016578;Unigene0016579;Unigene0016580;Unigene0030302;Unigene0030303;Unigene0030956;Unigene0030957;Unigene0030958;Unigene0032587;Unigene0037712;Unigene0039032;Unigene0039033;Unigene0039035;Unigene0042870;Unigene0042876;Unigene0043171;Unigene0043172;Unigene0043173;Unigene00…	K00549+K00549+K00549+K13811+K13811+K00384+K01739+K01739+K00384+K00384+K00384+K08247+K08247+K13811+K13811+K13811+K00549+K01761+K01760+K01760+K01760+K01874+K01874+K00549+K00549+K00549+K00549+K11717+K11717+K11717+K00549+K01874
Metabolism	Glycan biosynthesis and metabolism	Glycosaminoglycan degradation	31	ko00531	Unigene0008845;Unigene0008846;Unigene0017435;Unigene0017436;Unigene0025927;Unigene0027791;Unigene0027793;Unigene0029402;Unigene0029403;Unigene0029404;Unigene0029405;Unigene0029563;Unigene0029564;Unigene0029565;Unigene0030656;Unigene0034251;Unigene0034252;Unigene0035579;Unigene0036011;Unigene0036014;Unigene0039358;Unigene0039359;Unigene0039360;Unigene0039362;Unigene0039954;Unigene0039955;Unigene00…	K12373+K12373+K12373+K12373+K10532+K10532+K10532+K01205+K01205+K01205+K01205+K12373+K12373+K12373+K07964+K07964+K07964+K07964+K12309+K12309+K01205+K01205+K01205+K01205+K10532+K10532+K12309+K12373+K12373+K12373+K12309
Metabolism	Lipid metabolism	Cutin, suberine and wax biosynthesis	31	ko00073	Unigene0000518;Unigene0003276;Unigene0005037;Unigene0005125;Unigene0008900;Unigene0008901;Unigene0008902;Unigene0012427;Unigene0013327;Unigene0013328;Unigene0014992;Unigene0027729;Unigene0027986;Unigene0029029;Unigene0029030;Unigene0029535;Unigene0031197;Unigene0033934;Unigene0040059;Unigene0040060;Unigene0044469;Unigene0044472;Unigene0044474;Unigene0047130;Unigene0051379;Unigene0052659;Unigene00…	K15400+K15400+K13407+K15403+K15400+K15400+K15400+K13407+K17991+K17991+K13356+K15402+K15400+K15402+K15402+K17991+K13356+K15404+K15403+K15403+K15404+K15404+K15404+K15404+K13356+K13407+K15398+K15400+K15400+K15398+K15398
Metabolism	Amino acid metabolism	Histidine metabolism	30	ko00340	Unigene0001481;Unigene0007212;Unigene0009719;Unigene0009720;Unigene0009721;Unigene0009739;Unigene0009740;Unigene0015755;Unigene0015756;Unigene0018320;Unigene0022485;Unigene0022486;Unigene0026453;Unigene0026454;Unigene0027890;Unigene0031189;Unigene0031190;Unigene0034703;Unigene0035310;Unigene0035311;Unigene0035312;Unigene0035380;Unigene0035560;Unigene0035794;Unigene0035795;Unigene0035815;Unigene00…	K01663+K00765+K00128+K00128+K00128+K00128+K00128+K00128+K00128+K00128+K00013+K00013+K00128+K00128+K00128+K11755+K11755+K14085+K00817+K00817+K00817+K01693+K01590+K01814+K01814+K18649+K18649+K00128+K14085+K14085
Metabolism	Metabolism of terpenoids and polyketides	Sesquiterpenoid and triterpenoid biosynthesis	29	ko00909	Unigene0015593;Unigene0015594;Unigene0015941;Unigene0015942;Unigene0018346;Unigene0018406;Unigene0018407;Unigene0018408;Unigene0018409;Unigene0023718;Unigene0029296;Unigene0031239;Unigene0034075;Unigene0034076;Unigene0035106;Unigene0038376;Unigene0038377;Unigene0038378;Unigene0038379;Unigene0038380;Unigene0039100;Unigene0039101;Unigene0041214;Unigene0041215;Unigene0044679;Unigene0044687;Unigene00…	K15803+K15803+K00801+K00801+K15803+K15813+K15813+K15813+K15813+K00511+K00511+K00511+K15813+K15813+K15891+K15803+K15803+K15803+K15803+K15803+K15813+K15813+K15812+K15812+K00511+K00511+K00511+K15813+K15813
Metabolism	Amino acid metabolism	Valine, leucine and isoleucine biosynthesis	29	ko00290	Unigene0005817;Unigene0005818;Unigene0007755;Unigene0008856;Unigene0008857;Unigene0008858;Unigene0009363;Unigene0013182;Unigene0013183;Unigene0021314;Unigene0022165;Unigene0025222;Unigene0031525;Unigene0031526;Unigene0040858;Unigene0040859;Unigene0040860;Unigene0041504;Unigene0041505;Unigene0042825;Unigene0042826;Unigene0043750;Unigene0043751;Unigene0046987;Unigene0052453;Unigene0053261;Unigene00…	K00053+K00053+K01653+K01703+K01703+K01703+K01754+K01649+K01649+K01653+K00826+K01754+K01649+K01649+K01754+K01754+K01754+K00052+K00052+K00826+K00826+K01687+K01687+K01652+K01652+K01754+K01649+K01704+K01649
Metabolism	Metabolism of cofactors and vitamins	One carbon pool by folate	28	ko00670	Unigene0008474;Unigene0009808;Unigene0009809;Unigene0010164;Unigene0010165;Unigene0023467;Unigene0023783;Unigene0023784;Unigene0024842;Unigene0024843;Unigene0029359;Unigene0030603;Unigene0031224;Unigene0031225;Unigene0031226;Unigene0031227;Unigene0031228;Unigene0032696;Unigene0036008;Unigene0036009;Unigene0036010;Unigene0036065;Unigene0036066;Unigene0036067;Unigene0039811;Unigene0046417;Unigene00…	K00600+K00600+K00600+K00297+K00297+K00600+K00600+K00600+K01934+K01934+K00605+K00601+K00600+K00600+K00600+K00600+K00600+K00600+K00604+K01433+K01433+K01934+K01934+K01934+K13998+K00602+K00602+K01938
Metabolism	Biosynthesis of other secondary metabolites	Tropane, piperidine and pyridine alkaloid biosynthesis	28	ko00960	Unigene0004408;Unigene0005025;Unigene0009465;Unigene0009466;Unigene0009467;Unigene0010728;Unigene0010898;Unigene0015748;Unigene0016067;Unigene0016068;Unigene0017111;Unigene0017699;Unigene0021237;Unigene0022083;Unigene0024492;Unigene0024493;Unigene0028370;Unigene0028371;Unigene0029171;Unigene0031988;Unigene0034234;Unigene0035310;Unigene0035311;Unigene0035312;Unigene0036096;Unigene0036097;Unigene00…	K14455+K00811+K14454+K14454+K14454+K08081+K08081+K08081+K00276+K00276+K00815+K00276+K14455+K00815+K00276+K00276+K00815+K00815+K15849+K08081+K00276+K00817+K00817+K00817+K00815+K00815+K00815+K00815
Metabolism	Metabolism of terpenoids and polyketides	Diterpenoid biosynthesis	28	ko00904	Unigene0000440;Unigene0000441;Unigene0004849;Unigene0010808;Unigene0010996;Unigene0010997;Unigene0010998;Unigene0012332;Unigene0014840;Unigene0018744;Unigene0018745;Unigene0018746;Unigene0023841;Unigene0030384;Unigene0030385;Unigene0030884;Unigene0031055;Unigene0031332;Unigene0031333;Unigene0033690;Unigene0033691;Unigene0041029;Unigene0041030;Unigene0044239;Unigene0053179;Unigene0055696;Unigene00…	K04121+K04121+K04124+K04120+K05282+K05282+K05282+K05282+K04125+K04125+K04125+K04125+K04122+K04125+K04125+K04125+K04125+K04123+K04123+K04121+K04121+K04123+K04123+K04121+K04123+K04121+K05282+K05282
Metabolism	Carbohydrate metabolism	Butanoate metabolism	28	ko00650	Unigene0002725;Unigene0002726;Unigene0002727;Unigene0004286;Unigene0004287;Unigene0006804;Unigene0006805;Unigene0007755;Unigene0008948;Unigene0013593;Unigene0013594;Unigene0016052;Unigene0016053;Unigene0021314;Unigene0021971;Unigene0021972;Unigene0024728;Unigene0027362;Unigene0029793;Unigene0029794;Unigene0032185;Unigene0034397;Unigene0040851;Unigene0040852;Unigene0045974;Unigene0045975;Unigene00…	K01641+K01641+K01641+K01640+K01640+K01640+K01640+K01653+K00626+K16871+K16871+K01580+K01580+K01653+K00074+K00074+K01580+K18121+K18121+K18121+K16871+K00626+K17761+K17761+K01580+K01580+K01652+K01652
Metabolism	Metabolism of cofactors and vitamins	Nicotinate and nicotinamide metabolism	27	ko00760	Unigene0004934;Unigene0007937;Unigene0007938;Unigene0009790;Unigene0014505;Unigene0017526;Unigene0018568;Unigene0018569;Unigene0020562;Unigene0023892;Unigene0029427;Unigene0029428;Unigene0029698;Unigene0029699;Unigene0029700;Unigene0030076;Unigene0031022;Unigene0031023;Unigene0031792;Unigene0034715;Unigene0036188;Unigene0039612;Unigene0041224;Unigene0041225;Unigene0041226;Unigene0042115;Unigene00…	K01950+K00278+K00278+K01513+K00858+K03426+K00763+K00763+K18551+K03787+K03517+K03517+K00858+K00858+K00858+K00767+K00278+K00278+K01240+K00858+K03787+K01081+K06210+K06210+K06210+K01950+K03426
Metabolism	Metabolism of terpenoids and polyketides	Brassinosteroid biosynthesis	26	ko00905	Unigene0002864;Unigene0002865;Unigene0006475;Unigene0006476;Unigene0006477;Unigene0009292;Unigene0010029;Unigene0010030;Unigene0011500;Unigene0011501;Unigene0011702;Unigene0014629;Unigene0014630;Unigene0015271;Unigene0017019;Unigene0030095;Unigene0030096;Unigene0039435;Unigene0044204;Unigene0044208;Unigene0044211;Unigene0046545;Unigene0046861;Unigene0046863;Unigene0053336;Unigene0055902	K15639+K15639+K12639+K12639+K12639+K12638+K12638+K12638+K15639+K15639+K09591+K12638+K12638+K15639+K12640+K09587+K09587+K09588+K15639+K15639+K15639+K12637+K12637+K12637+K12638+K09587
Metabolism	Global and Overview	Degradation of aromatic compounds	26	ko01220	Unigene0017722;Unigene0017723;Unigene0028504;Unigene0028505;Unigene0029191;Unigene0029192;Unigene0029193;Unigene0039067;Unigene0039068;Unigene0039069;Unigene0041846;Unigene0041847;Unigene0041848;Unigene0041849;Unigene0041851;Unigene0041852;Unigene0041853;Unigene0041854;Unigene0045389;Unigene0046714;Unigene0046715;Unigene0046716;Unigene0046717;Unigene0051429;Unigene0052894;Unigene0055531	K00121+K00121+K00001+K00001+K00487+K00487+K00487+K00121+K00121+K00121+K00121+K00121+K00121+K00121+K00121+K00121+K00121+K00121+K00121+K00487+K00487+K00487+K00487+K00487+K00480+K00001
Genetic Information Processing	Replication and repair	Non-homologous end-joining	24	ko03450	Unigene0021089;Unigene0021090;Unigene0030905;Unigene0030906;Unigene0033001;Unigene0037444;Unigene0037445;Unigene0038308;Unigene0038309;Unigene0042599;Unigene0042600;Unigene0042604;Unigene0042607;Unigene0043413;Unigene0044514;Unigene0044516;Unigene0046590;Unigene0047125;Unigene0048539;Unigene0048547;Unigene0048548;Unigene0048549;Unigene0048550;Unigene0048551	K10886+K10886+K10884+K10884+K10866+K04799+K04799+K10865+K10865+K10866+K10866+K10866+K10866+K10777+K10866+K10866+K10885+K03512+K10866+K10866+K10866+K10866+K10866+K10866
Metabolism	Glycan biosynthesis and metabolism	Glycosphingolipid biosynthesis - globo series	24	ko00603	Unigene0008114;Unigene0008845;Unigene0008846;Unigene0014076;Unigene0017435;Unigene0017436;Unigene0023713;Unigene0025887;Unigene0025888;Unigene0029563;Unigene0029564;Unigene0029565;Unigene0029748;Unigene0030167;Unigene0030168;Unigene0030169;Unigene0033003;Unigene0033004;Unigene0033005;Unigene0045021;Unigene0045022;Unigene0045023;Unigene0054363;Unigene0055882	K01988+K12373+K12373+K07407+K12373+K12373+K01988+K07407+K07407+K12373+K12373+K12373+K07407+K07407+K07407+K07407+K07407+K07407+K07407+K12373+K12373+K12373+K01988+K01988
Metabolism	Energy metabolism	Photosynthesis - antenna proteins	24	ko00196	Unigene0001610;Unigene0009639;Unigene0009640;Unigene0010015;Unigene0010016;Unigene0010951;Unigene0010952;Unigene0016859;Unigene0018661;Unigene0018733;Unigene0020139;Unigene0020140;Unigene0020141;Unigene0024578;Unigene0024839;Unigene0024840;Unigene0026923;Unigene0026924;Unigene0037129;Unigene0038971;Unigene0038972;Unigene0040040;Unigene0040041;Unigene0050896	K08908+K08910+K08910+K08910+K08910+K08914+K08914+K08909+K08912+K08911+K08917+K08917+K08917+K08907+K14172+K14172+K08916+K08916+K08912+K08912+K08912+K08915+K08915+K08908
Metabolism	Metabolism of cofactors and vitamins	Folate biosynthesis	23	ko00790	Unigene0003991;Unigene0007955;Unigene0007956;Unigene0015690;Unigene0018096;Unigene0018097;Unigene0024176;Unigene0024177;Unigene0029203;Unigene0032468;Unigene0036230;Unigene0036707;Unigene0039811;Unigene0042278;Unigene0044102;Unigene0044105;Unigene0044725;Unigene0047517;Unigene0047523;Unigene0047525;Unigene0048415;Unigene0048420;Unigene0057040	K18482+K01495+K01495+K18482+K01307+K01307+K01307+K01307+K13941+K01930+K01113+K13950+K13998+K03639+K01633+K03639+K03635+K03635+K03635+K03635+K01930+K01930+K01930
Metabolism	Metabolism of cofactors and vitamins	Biotin metabolism	21	ko00780	Unigene0004538;Unigene0004539;Unigene0008526;Unigene0008661;Unigene0012824;Unigene0012825;Unigene0014295;Unigene0014296;Unigene0017822;Unigene0018905;Unigene0026318;Unigene0031725;Unigene0036549;Unigene0036550;Unigene0036551;Unigene0038030;Unigene0038031;Unigene0038743;Unigene0040280;Unigene0043698;Unigene0056941	K00059+K00059+K00059+K09458+K00208+K00208+K00059+K00059+K00059+K01012+K09458+K00059+K01942+K01942+K01942+K19562+K19562+K09458+K00652+K09458+K02372
Metabolism	Metabolism of cofactors and vitamins	Vitamin B6 metabolism	20	ko00750	Unigene0004081;Unigene0014468;Unigene0014469;Unigene0015904;Unigene0016481;Unigene0016482;Unigene0023015;Unigene0025597;Unigene0025598;Unigene0026766;Unigene0026767;Unigene0027778;Unigene0028332;Unigene0038402;Unigene0042457;Unigene0042458;Unigene0044903;Unigene0046527;Unigene0055537;Unigene0056883	K01733+K05275+K05275+K00831+K00831+K00831+K01733+K13248+K13248+K00275+K00275+K13248+K01733+K00868+K06215+K06215+K00831+K08681+K06215+K13248
Metabolism	Lipid metabolism	Arachidonic acid metabolism	20	ko00590	Unigene0000152;Unigene0000153;Unigene0001743;Unigene0006403;Unigene0006404;Unigene0010707;Unigene0019314;Unigene0019315;Unigene0019316;Unigene0019317;Unigene0021434;Unigene0025667;Unigene0028409;Unigene0028410;Unigene0029270;Unigene0030356;Unigene0030357;Unigene0038304;Unigene0039116;Unigene0053893	K00432+K00432+K01254+K05309+K05309+K00079+K05309+K05309+K05309+K05309+K14674+K00432+K15730+K15730+K18592+K01047+K01047+K00432+K00432+K00432
Metabolism	Metabolism of cofactors and vitamins	Thiamine metabolism	19	ko00730	Unigene0004082;Unigene0007138;Unigene0008915;Unigene0008916;Unigene0011240;Unigene0011241;Unigene0025426;Unigene0025427;Unigene0029413;Unigene0034475;Unigene0034477;Unigene0034478;Unigene0034822;Unigene0034823;Unigene0040599;Unigene0042645;Unigene0045810;Unigene0052670;Unigene0055885	K03146+K00949+K01662+K01662+K03146+K03146+K01662+K01662+K01662+K03147+K03147+K03147+K04487+K04487+K06928+K14153+K01662+K00878+K03146
Genetic Information Processing	Folding, sorting and degradation	Sulfur relay system	19	ko04122	Unigene0030188;Unigene0032063;Unigene0034107;Unigene0034108;Unigene0034109;Unigene0034822;Unigene0034823;Unigene0040834;Unigene0040835;Unigene0040836;Unigene0042278;Unigene0043561;Unigene0044105;Unigene0044725;Unigene0046278;Unigene0046280;Unigene0047517;Unigene0047523;Unigene0047525	K12161+K01011+K14168+K14168+K14168+K04487+K04487+K00566+K00566+K00566+K03639+K11996+K03639+K03635+K14169+K14169+K03635+K03635+K03635
Metabolism	Amino acid metabolism	Lysine biosynthesis	18	ko00300	Unigene0000182;Unigene0000183;Unigene0024064;Unigene0024065;Unigene0027335;Unigene0027336;Unigene0030211;Unigene0034703;Unigene0045035;Unigene0045037;Unigene0049052;Unigene0050049;Unigene0051300;Unigene0051301;Unigene0051475;Unigene0051565;Unigene0053943;Unigene0057265	K12524+K12524+K00928+K00928+K10206+K10206+K10206+K14085+K01714+K01714+K01778+K14085+K01586+K01586+K00133+K01778+K00215+K14085
Metabolism	Metabolism of terpenoids and polyketides	Limonene and pinene degradation	18	ko00903	Unigene0001141;Unigene0002009;Unigene0005861;Unigene0009720;Unigene0009739;Unigene0009740;Unigene0019404;Unigene0019560;Unigene0019561;Unigene0019562;Unigene0019563;Unigene0024972;Unigene0026454;Unigene0029986;Unigene0029993;Unigene0031940;Unigene0042269;Unigene0051315	K00517+K00517+K00517+K00128+K00128+K00128+K00517+K00517+K00517+K00517+K00517+K00517+K00128+K00517+K00517+K00517+K00517+K00517
Metabolism	Metabolism of other amino acids	Taurine and hypotaurine metabolism	16	ko00430	Unigene0005928;Unigene0007280;Unigene0013334;Unigene0013335;Unigene0013336;Unigene0016052;Unigene0016053;Unigene0016264;Unigene0016265;Unigene0024728;Unigene0029270;Unigene0031289;Unigene0031290;Unigene0031666;Unigene0045974;Unigene0045975	K10712+K10712+K10712+K10712+K10712+K01580+K01580+K10712+K10712+K01580+K18592+K10712+K10712+K10712+K01580+K01580
Metabolism	Glycan biosynthesis and metabolism	Glycosphingolipid biosynthesis - ganglio series	14	ko00604	Unigene0008845;Unigene0008846;Unigene0017435;Unigene0017436;Unigene0029563;Unigene0029564;Unigene0029565;Unigene0036011;Unigene0036014;Unigene0043393;Unigene0045021;Unigene0045022;Unigene0045023;Unigene0047392	K12373+K12373+K12373+K12373+K12373+K12373+K12373+K12309+K12309+K12309+K12373+K12373+K12373+K12309
Metabolism	Biosynthesis of other secondary metabolites	Monobactam biosynthesis	13	ko00261	Unigene0000182;Unigene0000183;Unigene0006926;Unigene0006927;Unigene0024064;Unigene0024065;Unigene0030956;Unigene0030957;Unigene0030958;Unigene0045035;Unigene0045037;Unigene0051475;Unigene0053943	K12524+K12524+K13811+K13811+K00928+K00928+K13811+K13811+K13811+K01714+K01714+K00133+K00215
Metabolism	Metabolism of terpenoids and polyketides	Monoterpenoid biosynthesis	12	ko00902	Unigene0002475;Unigene0002476;Unigene0009177;Unigene0010090;Unigene0011685;Unigene0042290;Unigene0042292;Unigene0044944;Unigene0044945;Unigene0044946;Unigene0051138;Unigene0052662	K15086+K15086+K15095+K15086+K15086+K15095+K15095+K15086+K15086+K15086+K15086+K15086
Metabolism	Glycan biosynthesis and metabolism	Other types of O-glycan biosynthesis	10	ko00514	Unigene0002556;Unigene0003520;Unigene0003521;Unigene0003522;Unigene0010094;Unigene0010095;Unigene0012071;Unigene0020448;Unigene0042082;Unigene0042084	K13667+K03691+K03691+K03691+K18134+K18134+K03691+K00735+K09667+K09667
Metabolism	Metabolism of cofactors and vitamins	Riboflavin metabolism	10	ko00740	Unigene0019692;Unigene0022398;Unigene0038234;Unigene0038294;Unigene0038295;Unigene0044961;Unigene0046157;Unigene0047638;Unigene0056367;Unigene0056368	K00793+K14652+K18453+K11752+K11752+K00861+K14652+K11752+K00794+K00794
Metabolism	Carbohydrate metabolism	C5-Branched dibasic acid metabolism	10	ko00660	Unigene0007755;Unigene0008856;Unigene0008857;Unigene0008858;Unigene0021314;Unigene0041504;Unigene0041505;Unigene0046987;Unigene0052453;Unigene0054988	K01653+K01703+K01703+K01703+K01653+K00052+K00052+K01652+K01652+K01704
Metabolism	Metabolism of cofactors and vitamins	Lipoic acid metabolism	9	ko00785	Unigene0011879;Unigene0011880;Unigene0011881;Unigene0028191;Unigene0028192;Unigene0028886;Unigene0028887;Unigene0044886;Unigene0044888	K03801+K03801+K03801+K03644+K03644+K03644+K03644+K03801+K03801
Metabolism	Lipid metabolism	Synthesis and degradation of ketone bodies	9	ko00072	Unigene0002725;Unigene0002726;Unigene0002727;Unigene0004286;Unigene0004287;Unigene0006804;Unigene0006805;Unigene0008948;Unigene0034397	K01641+K01641+K01641+K01640+K01640+K01640+K01640+K00626+K00626
Metabolism	Biosynthesis of other secondary metabolites	Anthocyanin biosynthesis	5	ko00942	Unigene0012310;Unigene0012311;Unigene0013052;Unigene0039495;Unigene0051524	K12338+K12338+K12338+K12338+K12937
Metabolism	Biosynthesis of other secondary metabolites	Flavone and flavonol biosynthesis	5	ko00944	Unigene0004578;Unigene0033596;Unigene0033597;Unigene0037514;Unigene0051975	K05280+K13264+K13264+K05279+K05280
Metabolism	Biosynthesis of other secondary metabolites	Caffeine metabolism	3	ko00232	Unigene0038028;Unigene0038029;Unigene0041101	K00106+K00106+K00365
Metabolism	Biosynthesis of other secondary metabolites	Isoflavonoid biosynthesis	2	ko00943	Unigene0033596;Unigene0033597	K13264+K13264
