# Supplementary material for: De novo sequencing and analysis of the transcriptome during the browning of fresh-cut Luffa cylindrica 'Fusi-3' fruits
Source: PLoS One. 2017 Nov 16;12(11):e0187117. doi: 10.1371/journal.pone.0187117 (PMC5690621; doi:10.1371/journal.pone.0187117)
Supplement: S3 Table — (XLSX) [file pone.0187117.s003.xlsx]

## Sheet: Sheet1
id	CK_rpkm	B1_rpkm	B2_rpkm	B3_rpkm	CK_count	B1_count	B2_count	B3_count	Description	Pathway	GO Component	GO Function	GO Process
Unigene0000001	13.0363	7.5536	7.2245	17.0655	104	55	58	125	hypothetical protein Csa_6G318690 [Cucumis sativus]	-	-	-	-
Unigene0000002	1.4993	1.4373	0.7449	0	8	7	4	0	--	-	-	-	-
Unigene0000003	0.9463	1.8663	1.6927	0	5	9	9	0	--	-	-	-	-
Unigene0000004	0	0	0	0	0	0	0	0	PREDICTED: CLAVATA3/ESR (CLE)-related protein 13 [Cucumis melo]	-	GO:0005576//extracellular region	-	GO:0044699//single-organism process
Unigene0000005	1.2119	2.1023	2.4085	0.44	12	19	24	4	PREDICTED: CLAVATA3/ESR (CLE)-related protein 13 [Cucumis melo]	-	GO:0005576//extracellular region	-	GO:0044699//single-organism process
Unigene0000006	2.157	0	0.2679	0	8	0	1	0	--	-	-	-	-
Unigene0000007	2.0414	0.8133	0	0.4043	11	4	0	2	PREDICTED: U-box domain-containing protein 52 isoform X2 [Cucumis melo]	-	-	GO:0097367//carbohydrate derivative binding;GO:0016773//phosphotransferase activity, alcohol group as acceptor;GO:1901363//heterocyclic compound binding;GO:0003824//catalytic activity;GO:0016740//transferase activity;GO:0016772//transferase activity, transferring phosphorus-containing groups;GO:0001883//purine nucleoside binding;GO:0032550//purine ribonucleoside binding;GO:0004672//protein kinase…	GO:0044260//cellular macromolecule metabolic process;GO:0006793//phosphorus metabolic process;GO:0036211//protein modification process;GO:0043412//macromolecule modification;GO:0009987//cellular process;GO:0006796//phosphate-containing compound metabolic process;GO:0050896//response to stimulus;GO:0044238//primary metabolic process;GO:0044237//cellular metabolic process;GO:0008152//metabolic proc…
Unigene0000008	1.7696	1.9389	5.4513	0.1927	10	10	31	1	--	-	-	-	-
Unigene0000009	0.7655	1.6775	1.0143	1.9455	3	6	4	7	--	-	-	-	-
Unigene0000010	0	0	0	0	0	0	0	0	--	-	-	-	-
Unigene0000011	0.2198	0.2409	0	0	1	1	0	0	--	-	-	-	-
Unigene0000012	0	1.7518	3.5351	3.2651	0	40	89	75	Endoglucanase [Medicago truncatula]	-	-	GO:0003824//catalytic activity;GO:0016798//hydrolase activity, acting on glycosyl bonds;GO:0016787//hydrolase activity	GO:0044238//primary metabolic process;GO:0008152//metabolic process
Unigene0000013	2.5632	0.2808	1.5282	0.2792	10	1	6	1	--	-	-	-	-
Unigene0000014	1.0634	1.1651	0.5284	0.2896	4	4	2	1	--	-	-	-	-
Unigene0000015	0.769	1.4042	1.0188	0.8375	3	5	4	3	--	-	-	-	-
Unigene0000016	0.1905	0.4175	0.568	1.2451	1	2	3	6	ty3-gypsy retrotransposon protein [Cucumis melo subsp. melo]	-	GO:0005623//cell;GO:0043226//organelle;GO:0005622//intracellular;GO:0043229//intracellular organelle;GO:0044464//cell part;GO:0044424//intracellular part;GO:0043231//intracellular membrane-bounded organelle;GO:0043227//membrane-bounded organelle	-	GO:0006355//regulation of transcription, DNA-templated;GO:0031323//regulation of cellular metabolic process;GO:2000112//regulation of cellular macromolecule biosynthetic process;GO:0051171//regulation of nitrogen compound metabolic process;GO:0019219//regulation of nucleobase-containing compound metabolic process;GO:0065007//biological regulation;GO:0050789//regulation of biological process;GO:00…
Unigene0000017	0.2911	0.1595	0.5062	0.2378	8	4	14	6	Glycerol kinase [Gossypium arboreum]	-	GO:0044424//intracellular part;GO:0005622//intracellular;GO:0043231//intracellular membrane-bounded organelle;GO:0009536//plastid;GO:0044444//cytoplasmic part;GO:0043226//organelle;GO:0043229//intracellular organelle;GO:0005737//cytoplasm;GO:0005623//cell;GO:0044464//cell part;GO:0043227//membrane-bounded organelle	-	-
Unigene0000018	1.7686	1.2369	4.0758	4.0574	47	30	109	99	Glycerol kinase [Gossypium arboreum]	-	GO:0044464//cell part;GO:0043229//intracellular organelle;GO:0005737//cytoplasm;GO:0044444//cytoplasmic part;GO:0005622//intracellular;GO:0044424//intracellular part;GO:0043227//membrane-bounded organelle;GO:0009536//plastid;GO:0005623//cell;GO:0043226//organelle;GO:0043231//intracellular membrane-bounded organelle	-	-
Unigene0000019	0	0	0	0	0	0	0	0	Glycerol kinase [Gossypium arboreum]	-	GO:0009536//plastid;GO:0005623//cell;GO:0005622//intracellular;GO:0044464//cell part;GO:0043227//membrane-bounded organelle;GO:0043226//organelle;GO:0043229//intracellular organelle;GO:0044424//intracellular part;GO:0044444//cytoplasmic part;GO:0043231//intracellular membrane-bounded organelle;GO:0005737//cytoplasm	-	-
Unigene0000020	0.5185	0.8521	2.9623	0	4	6	23	0	--	-	-	-	-
Unigene0000021	4.234	1.9626	1.1328	0	26	11	7	0	--	-	-	-	-
Unigene0000022	3.0853	3.3804	3.8727	1.238	19	19	24	7	--	-	-	-	-
Unigene0000023	0	1.1155	0.5781	1.5841	0	7	4	10	PREDICTED: ethylene-responsive transcription factor ERF003-like [Cucumis sativus]	-	GO:0043229//intracellular organelle;GO:0005623//cell;GO:0043227//membrane-bounded organelle;GO:0005622//intracellular;GO:0043231//intracellular membrane-bounded organelle;GO:0044464//cell part;GO:0043226//organelle;GO:0044424//intracellular part	GO:0005488//binding;GO:1901363//heterocyclic compound binding;GO:0097159//organic cyclic compound binding;GO:0003676//nucleic acid binding;GO:0001071//nucleic acid binding transcription factor activity	GO:0044237//cellular metabolic process;GO:0065007//biological regulation;GO:0050789//regulation of biological process;GO:0044249//cellular biosynthetic process;GO:0008152//metabolic process;GO:0009987//cellular process;GO:0034645//cellular macromolecule biosynthetic process;GO:1901576//organic substance biosynthetic process;GO:0044260//cellular macromolecule metabolic process;GO:0009058//biosynth…
Unigene0000024	0.2507	0	0.9965	2.1844	1	0	4	8	--	-	-	-	-
Unigene0000025	0.4844	0	0	0	2	0	0	0	unknown [Cucumis melo]	-	-	-	-
Unigene0000026	0	0	0	0	0	0	0	0	unknown [Cucumis melo]	-	-	-	-
Unigene0000027	0	0.8555	2.7934	1.871	0	5	18	11	serpin-like protein [Medicago truncatula]	-	-	-	-
Unigene0000028	0	0.1842	2.3388	1.831	0	1	14	10	PREDICTED: serpin-ZX-like [Cucumis sativus]	-	-	-	-
Unigene0000029	0.9487	0.5197	0.2357	0	4	2	1	0	--	-	-	-	-
Unigene0000030	0.6258	1.3714	1.0365	0	6	12	10	0	--	-	-	-	-
Unigene0000031	0	0	0.8442	0	0	0	7	0	--	-	-	-	-
Unigene0000032	0.7258	0	3.7866	0.9882	4	0	21	5	--	-	-	-	-
Unigene0000033	0	0.9244	2.3055	0.6892	0	4	11	3	PREDICTED: 12-oxophytodienoate reductase 2-like [Vitis vinifera]	ko00592//alpha-Linolenic acid metabolism//Lipid metabolism//Metabolism	-	GO:0000166//nucleotide binding;GO:0016627//oxidoreductase activity, acting on the CH-CH group of donors;GO:1901363//heterocyclic compound binding;GO:0003824//catalytic activity;GO:0005488//binding;GO:0016628//oxidoreductase activity, acting on the CH-CH group of donors, NAD or NADP as acceptor;GO:0016491//oxidoreductase activity;GO:0097367//carbohydrate derivative binding;GO:0036094//small molecu…	GO:0044699//single-organism process;GO:0044710//single-organism metabolic process;GO:0008152//metabolic process
Unigene0000034	0.8244	0	1.0923	0	3	0	4	0	Peptidase aspartic, active site [Medicago truncatula]	-	-	GO:0005488//binding	-
Unigene0000035	0.2939	0.1718	0.0389	0.0854	15	8	2	4	PREDICTED: vacuolar proton ATPase a3 [Cucumis melo]	ko00190//Oxidative phosphorylation//Energy metabolism//Metabolism;ko04145//Phagosome//Transport and catabolism//Cellular Processes	GO:0044425//membrane part;GO:0043234//protein complex;GO:0016020//membrane;GO:0016469//proton-transporting two-sector ATPase complex;GO:0032991//macromolecular complex;GO:0033177//proton-transporting two-sector ATPase complex, proton-transporting domain;GO:0033176//proton-transporting V-type ATPase complex;GO:0031224//intrinsic component of membrane;GO:0033179//proton-transporting V-type ATPase, …	GO:0003824//catalytic activity;GO:0022892//substrate-specific transporter activity;GO:0008324//cation transmembrane transporter activity;GO:0015075//ion transmembrane transporter activity;GO:0022857//transmembrane transporter activity;GO:0022891//substrate-specific transmembrane transporter activity;GO:0015077//monovalent inorganic cation transmembrane transporter activity;GO:0005215//transporter…	GO:1902600//hydrogen ion transmembrane transport;GO:0044765//single-organism transport;GO:0015672//monovalent inorganic cation transport;GO:0098660//inorganic ion transmembrane transport;GO:0006818//hydrogen transport;GO:0051234//establishment of localization;GO:0015988//energy coupled proton transmembrane transport, against electrochemical gradient;GO:0006811//ion transport;GO:0098662//inorganic…
Unigene0000036	0	0	0	0	0	0	0	0	PREDICTED: vacuolar proton ATPase a3 [Cucumis melo]	ko00190//Oxidative phosphorylation//Energy metabolism//Metabolism;ko04145//Phagosome//Transport and catabolism//Cellular Processes	GO:0016020//membrane;GO:0016469//proton-transporting two-sector ATPase complex;GO:0033177//proton-transporting two-sector ATPase complex, proton-transporting domain;GO:0033179//proton-transporting V-type ATPase, V0 domain;GO:0044425//membrane part;GO:0031224//intrinsic component of membrane;GO:0032991//macromolecular complex;GO:0043234//protein complex;GO:0033176//proton-transporting V-type ATPas…	GO:0022891//substrate-specific transmembrane transporter activity;GO:0008324//cation transmembrane transporter activity;GO:0022890//inorganic cation transmembrane transporter activity;GO:0022857//transmembrane transporter activity;GO:0003824//catalytic activity;GO:0015075//ion transmembrane transporter activity;GO:0005215//transporter activity;GO:0022892//substrate-specific transporter activity;G…	GO:0015988//energy coupled proton transmembrane transport, against electrochemical gradient;GO:1902600//hydrogen ion transmembrane transport;GO:1902578//single-organism localization;GO:0098662//inorganic cation transmembrane transport;GO:0006818//hydrogen transport;GO:0015672//monovalent inorganic cation transport;GO:0006810//transport;GO:0098655//cation transmembrane transport;GO:0006812//cation…
Unigene0000037	4.9073	9.1037	4.7656	5.3448	88	149	86	88	--	-	-	-	-
Unigene0000038	1.429	1.1742	0.1775	0	8	6	1	0	--	-	-	-	-
Unigene0000039	961.683	383.863	282.1	227.965	8059	2936	2379	1754	--	-	-	-	-
Unigene0000040	0.2485	0.2723	2.9635	0.812	1	1	12	3	--	-	-	-	-
Unigene0000041	1.1045	1.664	0.2744	0.3007	8	11	2	2	--	-	-	-	-
Unigene0000042	0.438	1.1997	1.3057	1.1926	4	10	12	10	PREDICTED: protein gar2-like [Malus domestica]	-	-	-	-
Unigene0000043	2.6898	0.2456	0.6682	0	12	1	3	0	--	-	-	-	-
Unigene0000044	2.2712	0	0.5642	0	12	0	3	0	PREDICTED: probable (S)-N-methylcoclaurine 3'-hydroxylase isozyme 2 [Cucumis melo]	-	-	GO:0043167//ion binding;GO:0043169//cation binding;GO:0005488//binding;GO:0003824//catalytic activity;GO:0004497//monooxygenase activity;GO:0016705//oxidoreductase activity, acting on paired donors, with incorporation or reduction of molecular oxygen;GO:0046872//metal ion binding;GO:0016491//oxidoreductase activity	-
Unigene0000045	0.9294	1.2729	0.4618	0.5061	4	5	2	2	--	-	-	-	-
Unigene0000046	12.824	46.3591	65.0793	0.7843	374	1234	1910	21	PREDICTED: soyasapogenol B glucuronide galactosyltransferase-like [Glycine max]	-	-	GO:0003824//catalytic activity;GO:0016740//transferase activity	-
Unigene0000047	0	0	0	0	0	0	0	0	Abscisate beta-glucosyltransferase [Glycine soja]	ko00906//Carotenoid biosynthesis//Metabolism of terpenoids and polyketides//Metabolism	-	GO:0016740//transferase activity;GO:0003824//catalytic activity;GO:0016757//transferase activity, transferring glycosyl groups	-
Unigene0000048	2.0976	1.1491	0.7816	0	8	4	3	0	--	-	-	-	-
Unigene0000049	48.6376	54.3464	59.6755	75.4764	605	617	747	862	PREDICTED: U6 snRNA-associated Sm-like protein LSm3 [Populus euphratica]	ko03040//Spliceosome//Transcription//Genetic Information Processing;ko03018//RNA degradation//Folding, sorting and degradation//Genetic Information Processing	GO:0032991//macromolecular complex;GO:0044423//virion part;GO:0019012//virion	-	-
Unigene0000050	16.6905	37.4504	39.4189	31.1274	146	299	347	250	BnaA09g50560D [Brassica napus]	-	-	-	-
Unigene0000051	1.2797	0.701	0.4239	0.4646	6	3	2	2	--	-	-	-	-
Unigene0000052	0.1918	0	0.1906	0.4178	2	0	2	4	PREDICTED: leucine-rich repeat receptor-like serine/threonine-protein kinase BAM1 [Cucumis sativus]	-	GO:0044425//membrane part;GO:0016020//membrane;GO:0031224//intrinsic component of membrane	GO:0016491//oxidoreductase activity;GO:0032549//ribonucleoside binding;GO:0016301//kinase activity;GO:0016627//oxidoreductase activity, acting on the CH-CH group of donors;GO:0003824//catalytic activity;GO:1901363//heterocyclic compound binding;GO:0016740//transferase activity;GO:0036094//small molecule binding;GO:0004871//signal transducer activity;GO:0004674//protein serine/threonine kinase act…	GO:0044763//single-organism cellular process;GO:0031323//regulation of cellular metabolic process;GO:0001932//regulation of protein phosphorylation;GO:0045937//positive regulation of phosphate metabolic process;GO:0044093//positive regulation of molecular function;GO:0051174//regulation of phosphorus metabolic process;GO:0009987//cellular process;GO:0044700//single organism signaling;GO:0032268//…
Unigene0000053	43.1866	25.8959	30.5498	34.809	2485	1360	1769	1839	PREDICTED: leucine-rich repeat receptor-like serine/threonine-protein kinase BAM1 [Cucumis sativus]	-	GO:0044425//membrane part;GO:0031224//intrinsic component of membrane;GO:0016020//membrane	GO:0005057//receptor signaling protein activity;GO:0001882//nucleoside binding;GO:0032549//ribonucleoside binding;GO:0097367//carbohydrate derivative binding;GO:0032550//purine ribonucleoside binding;GO:0016628//oxidoreductase activity, acting on the CH-CH group of donors, NAD or NADP as acceptor;GO:0004871//signal transducer activity;GO:0016740//transferase activity;GO:0016773//phosphotransferas…	GO:0001934//positive regulation of protein phosphorylation;GO:0009987//cellular process;GO:0019222//regulation of metabolic process;GO:0033674//positive regulation of kinase activity;GO:0008152//metabolic process;GO:0048518//positive regulation of biological process;GO:0031325//positive regulation of cellular metabolic process;GO:0044710//single-organism metabolic process;GO:0051338//regulation o…
Unigene0000054	0.5523	1.2102	3.5671	0	2	4	13	0	--	-	-	-	-
Unigene0000055	0.6408	1.2638	2.9291	0	5	9	23	0	--	-	-	-	-
Unigene0000056	2.117	0	1.2622	0.2306	10	0	6	1	PREDICTED: transposon Ty3-G Gag-Pol polyprotein [Populus euphratica]	-	-	GO:0097159//organic cyclic compound binding;GO:0005488//binding;GO:0003676//nucleic acid binding;GO:1901363//heterocyclic compound binding	GO:0008152//metabolic process
Unigene0000057	1.3773	0	0	0	6	0	0	0	--	-	-	-	-
Unigene0000058	122.164	89.115	38.9005	6.0162	1526	1016	489	69	PREDICTED: early nodulin-93-like [Cucumis melo]	-	-	-	-
Unigene0000059	0	0.4021	2.3704	2.798	0	4	26	28	SAUR-like auxin-responsive protein [Arabidopsis thaliana]	ko04075//Plant hormone signal transduction//Signal transduction//Environmental Information Processing	-	-	-
Unigene0000060	0	0	0	0	0	0	0	0	SAUR-like auxin-responsive protein [Arabidopsis thaliana]	ko04075//Plant hormone signal transduction//Signal transduction//Environmental Information Processing	-	-	-
Unigene0000061	2.1314	1.9106	1.1552	0	11	9	6	0	--	-	-	-	-
Unigene0000062	31.1846	25.8116	30.7633	23.9315	413	312	410	291	PREDICTED: HVA22-like protein f [Cucumis sativus]	-	-	-	-
Unigene0000063	0.5276	0.9635	1.3981	1.1493	3	5	8	6	PREDICTED: uncharacterized protein LOC104590523 [Nelumbo nucifera]	-	-	-	-
Unigene0000064	0	3.312	0	1.1972	0	11	0	4	--	-	-	-	-
Unigene0000065	0.3507	0.9605	0.6969	0.7639	2	5	4	4	PREDICTED: rop guanine nucleotide exchange factor 7-like [Cucumis melo]	-	-	-	-
Unigene0000066	0	0	0.4	0.2192	0	0	2	1	--	-	-	-	-
Unigene0000067	0.3906	1.2839	0.1294	0.5672	3	9	1	4	--	-	-	-	-
Unigene0000068	1.1665	2.0449	0.2318	0	5	8	1	0	YUCCA type protein 5 [Cucumis melo]	ko00380//Tryptophan metabolism//Amino acid metabolism//Metabolism	-	GO:0016491//oxidoreductase activity;GO:0016705//oxidoreductase activity, acting on paired donors, with incorporation or reduction of molecular oxygen;GO:0005488//binding;GO:0003824//catalytic activity;GO:0036094//small molecule binding;GO:0004497//monooxygenase activity;GO:1901363//heterocyclic compound binding;GO:0097159//organic cyclic compound binding;GO:0000166//nucleotide binding;GO:0016709/…	GO:0044710//single-organism metabolic process;GO:0008152//metabolic process;GO:0044699//single-organism process
Unigene0000069	13.4431	24.4339	26.9241	24.8566	258	428	520	438	PREDICTED: stress enhanced protein 2, chloroplastic [Cucumis melo]	-	GO:0043227//membrane-bounded organelle;GO:0044424//intracellular part;GO:0005623//cell;GO:0044425//membrane part;GO:0005737//cytoplasm;GO:0009579//thylakoid;GO:0009507//chloroplast;GO:0044444//cytoplasmic part;GO:0034357//photosynthetic membrane;GO:0044464//cell part;GO:0005622//intracellular;GO:0016020//membrane;GO:0044436//thylakoid part;GO:0009536//plastid;GO:0043229//intracellular organelle;G…	-	GO:0044237//cellular metabolic process;GO:0009987//cellular process;GO:0008152//metabolic process
Unigene0000070	2.8672	1.8241	0.3676	0.8059	31	18	4	8	--	-	-	-	-
Unigene0000071	0	0.5197	1.1784	0.775	0	2	5	3	PREDICTED: transcription repressor OFP6 [Cucumis sativus]	-	-	-	-
Unigene0000072	0	1.4452	1.0195	0	0	9	7	0	--	-	-	-	-
Unigene0000073	0	0.551	1.166	0.9128	0	3	7	5	pentatricopeptide repeat-containing protein [Arabidopsis thaliana]	-	-	-	-
Unigene0000074	2.6369	1.4446	1.3102	0.7602	34	17	17	9	Ty3/gypsy retrotransposon protein [Beta vulgaris subsp. vulgaris]	-	-	-	-
Unigene0000075	2.2891	0.836	1.4476	1.8132	33	11	21	24	PREDICTED: uncharacterized protein LOC103495051 [Cucumis melo]	-	-	-	-
Unigene0000076	1.6954	0.2654	0.2407	0	7	1	1	0	--	-	-	-	-
Unigene0000077	0	0	0	0	0	0	0	0	--	-	-	-	-
Unigene0000078	0	0	0	0	0	0	0	0	--	-	-	-	-
Unigene0000079	1.3609	0	0.2254	1.2352	6	0	1	5	--	-	-	-	-
Unigene0000080	2.1721	0.2505	2.3856	0	19	2	21	0	--	-	-	-	-
Unigene0000081	0	0	0	0	0	0	0	0	--	-	-	-	-
Unigene0000082	3.5725	0.4893	1.6271	1.9455	24	3	11	12	PREDICTED: small subunit processome component 20 homolog [Cucumis sativus]	-	-	-	-
Unigene0000083	1.0992	0.9033	2.1846	0.8979	8	6	16	6	--	-	-	-	-
Unigene0000084	0.7145	0	1.9525	0.9727	4	0	11	5	PREDICTED: probable LRR receptor-like serine/threonine-protein kinase At1g53440 [Cucumis melo]	-	-	GO:0003824//catalytic activity;GO:0016740//transferase activity;GO:0032550//purine ribonucleoside binding;GO:1901363//heterocyclic compound binding;GO:0016301//kinase activity;GO:0005488//binding;GO:0036094//small molecule binding;GO:0016773//phosphotransferase activity, alcohol group as acceptor;GO:0032549//ribonucleoside binding;GO:0001883//purine nucleoside binding;GO:0001882//nucleoside bindi…	GO:0044267//cellular protein metabolic process;GO:0044260//cellular macromolecule metabolic process;GO:0019538//protein metabolic process;GO:0043170//macromolecule metabolic process;GO:0006796//phosphate-containing compound metabolic process;GO:0006464//cellular protein modification process;GO:0009987//cellular process;GO:0043412//macromolecule modification;GO:0044238//primary metabolic process;G…
Unigene0000085	2.333	1.0225	0	0	10	4	0	0	--	-	-	-	-
Unigene0000086	0	0	0.2582	0.283	0	0	1	1	--	-	-	-	-
Unigene0000087	0.7911	1.5169	0.7862	0	4	7	4	0	--	-	-	-	-
Unigene0000088	0	0	0	0	0	0	0	0	--	-	-	-	-
Unigene0000089	1.6608	0.6065	0.2751	0	12	4	2	0	--	-	-	-	-
Unigene0000090	1.3626	2.6125	1.2186	1.113	20	35	18	15	PREDICTED: serine/threonine-protein kinase SMG1-like [Cucumis melo]	ko03015//mRNA surveillance pathway//Translation//Genetic Information Processing	-	GO:0097159//organic cyclic compound binding;GO:0036094//small molecule binding;GO:0005488//binding;GO:0003824//catalytic activity;GO:0004673//protein histidine kinase activity;GO:0001882//nucleoside binding;GO:0016301//kinase activity;GO:0004672//protein kinase activity;GO:0016775//phosphotransferase activity, nitrogenous group as acceptor;GO:0016773//phosphotransferase activity, alcohol group as…	GO:0044763//single-organism cellular process;GO:0044699//single-organism process;GO:0051716//cellular response to stimulus;GO:0035556//intracellular signal transduction;GO:0006796//phosphate-containing compound metabolic process;GO:0006793//phosphorus metabolic process;GO:0044237//cellular metabolic process;GO:0065007//biological regulation;GO:0050794//regulation of cellular process;GO:0044700//s…
Unigene0000091	1.0207	0.5592	0.5071	1.4823	6	3	3	8	PREDICTED: serine/threonine-protein kinase SMG1-like [Cucumis melo]	ko03015//mRNA surveillance pathway//Translation//Genetic Information Processing	-	GO:0001883//purine nucleoside binding;GO:0005488//binding;GO:0016772//transferase activity, transferring phosphorus-containing groups;GO:0032550//purine ribonucleoside binding;GO:0097367//carbohydrate derivative binding;GO:0016740//transferase activity;GO:0001882//nucleoside binding;GO:0016773//phosphotransferase activity, alcohol group as acceptor;GO:0032549//ribonucleoside binding;GO:0016301//k…	GO:0023052//signaling;GO:0006796//phosphate-containing compound metabolic process;GO:0007154//cell communication;GO:0050794//regulation of cellular process;GO:0044237//cellular metabolic process;GO:0051716//cellular response to stimulus;GO:0009987//cellular process;GO:0044763//single-organism cellular process;GO:0050789//regulation of biological process;GO:0006793//phosphorus metabolic process;GO…
Unigene0000092	2.2947	0	2.073	0	11	0	10	0	--	-	-	-	-
Unigene0000093	149.621	89.6272	121.211	119.968	6387	3492	5207	4702	patellin 1 [Cucurbita pepo]	-	GO:0044425//membrane part;GO:0016020//membrane;GO:0031224//intrinsic component of membrane	-	GO:0051179//localization;GO:0051234//establishment of localization
Unigene0000094	0.86	0.2513	1.4243	0.6869	15	4	25	11	PREDICTED: patellin-3-like [Cucumis melo]	-	GO:0016020//membrane;GO:0031224//intrinsic component of membrane;GO:0005623//cell;GO:0044464//cell part;GO:0044425//membrane part	GO:0042578//phosphoric ester hydrolase activity;GO:0016788//hydrolase activity, acting on ester bonds;GO:0003824//catalytic activity;GO:0016787//hydrolase activity	GO:0051234//establishment of localization;GO:0044237//cellular metabolic process;GO:0008152//metabolic process;GO:0051179//localization;GO:0006796//phosphate-containing compound metabolic process;GO:0006793//phosphorus metabolic process;GO:0009987//cellular process
Unigene0000095	2.0056	3.7187	3.756	2.6885	26	44	49	32	PREDICTED: RNA-binding protein 38-like [Cucumis melo]	-	-	GO:0005488//binding;GO:0097159//organic cyclic compound binding;GO:0036094//small molecule binding	-
Unigene0000096	0.6168	1.8022	2.2475	0.6718	3	8	11	3	PREDICTED: RNA-binding protein 38-like [Cucumis sativus]	-	-	GO:0097159//organic cyclic compound binding;GO:0005488//binding	-
Unigene0000097	0.4536	1.7396	1.5778	1.2352	2	7	7	5	PREDICTED: probable metal-nicotianamine transporter YSL7 [Cucumis sativus]	-	-	-	GO:0044763//single-organism cellular process;GO:0044699//single-organism process;GO:0009987//cellular process
Unigene0000098	0	5.9584	2.2996	2.2684	0	47	20	18	cytochrome c oxidase subunit I, partial (mitochondrion) [Lingulodinium polyedrum]	ko00190//Oxidative phosphorylation//Energy metabolism//Metabolism	GO:0044464//cell part;GO:0043229//intracellular organelle;GO:0031967//organelle envelope;GO:0044424//intracellular part;GO:0019866//organelle inner membrane;GO:0031975//envelope;GO:0044422//organelle part;GO:0044446//intracellular organelle part;GO:0043231//intracellular membrane-bounded organelle;GO:0016020//membrane;GO:0005622//intracellular;GO:0044425//membrane part;GO:0031090//organelle membr…	GO:0005488//binding;GO:0043167//ion binding;GO:0003824//catalytic activity;GO:0097159//organic cyclic compound binding;GO:0046872//metal ion binding;GO:1901363//heterocyclic compound binding;GO:0046914//transition metal ion binding;GO:0046906//tetrapyrrole binding;GO:0009055//electron carrier activity;GO:0043169//cation binding	GO:0044763//single-organism cellular process;GO:0044710//single-organism metabolic process;GO:0015992//proton transport;GO:0015672//monovalent inorganic cation transport;GO:0008152//metabolic process;GO:0006812//cation transport;GO:0051179//localization;GO:0006091//generation of precursor metabolites and energy;GO:0044237//cellular metabolic process;GO:0045333//cellular respiration;GO:0015980//en…
Unigene0000099	0.2159	4.1396	1.9309	3.6448	4	70	36	62	cytochrome c oxidase subunit I, partial (mitochondrion) [Lingulodinium polyedrum]	ko00190//Oxidative phosphorylation//Energy metabolism//Metabolism	GO:0016020//membrane;GO:0044424//intracellular part;GO:0031224//intrinsic component of membrane;GO:0044464//cell part;GO:0043231//intracellular membrane-bounded organelle;GO:0031090//organelle membrane;GO:0044425//membrane part;GO:0005622//intracellular;GO:0005623//cell;GO:0043229//intracellular organelle;GO:0031967//organelle envelope;GO:0043227//membrane-bounded organelle;GO:0043226//organelle;…	GO:0043169//cation binding;GO:0009055//electron carrier activity;GO:0046906//tetrapyrrole binding;GO:0003824//catalytic activity;GO:0043167//ion binding;GO:0097159//organic cyclic compound binding;GO:0005488//binding;GO:0046914//transition metal ion binding;GO:1901363//heterocyclic compound binding;GO:0046872//metal ion binding	GO:0044699//single-organism process;GO:0006818//hydrogen transport;GO:0044765//single-organism transport;GO:0051234//establishment of localization;GO:0006811//ion transport;GO:0015980//energy derivation by oxidation of organic compounds;GO:0015992//proton transport;GO:0009987//cellular process;GO:0015672//monovalent inorganic cation transport;GO:0006091//generation of precursor metabolites and en…
Unigene0000100	1.3481	0	0.5358	0	5	0	2	0	BnaA09g13800D [Brassica napus]	-	-	-	-
Unigene0000101	3.5163	2.6231	0.2974	0	47	32	4	0	PREDICTED: abscisic acid 8'-hydroxylase 2 [Cucumis melo]	-	-	GO:0046914//transition metal ion binding;GO:1901363//heterocyclic compound binding;GO:0043169//cation binding;GO:0043167//ion binding;GO:0016491//oxidoreductase activity;GO:0046872//metal ion binding;GO:0046906//tetrapyrrole binding;GO:0097159//organic cyclic compound binding;GO:0005488//binding;GO:0003824//catalytic activity	GO:0044699//single-organism process;GO:0008152//metabolic process;GO:0044710//single-organism metabolic process
Unigene0000102	3.5448	15.2439	0.8806	0.3861	40	157	10	4	PREDICTED: RING finger and CHY zinc finger domain-containing protein 1-like [Cucumis melo]	ko04120//Ubiquitin mediated proteolysis//Folding, sorting and degradation//Genetic Information Processing	-	-	-
Unigene0000103	2.1615	0.2631	0.716	0	9	1	3	0	--	-	-	-	-
Unigene0000104	13.6093	14.8613	19.8798	33.4496	300	299	441	677	PREDICTED: WD-40 repeat-containing protein MSI2-like [Cucumis sativus]	-	GO:0044424//intracellular part;GO:0043226//organelle;GO:0043227//membrane-bounded organelle;GO:0005622//intracellular;GO:0044464//cell part;GO:0043229//intracellular organelle;GO:0043231//intracellular membrane-bounded organelle;GO:0005623//cell	GO:0016407//acetyltransferase activity;GO:0016740//transferase activity;GO:0008080//N-acetyltransferase activity;GO:0016747//transferase activity, transferring acyl groups other than amino-acyl groups;GO:0016746//transferase activity, transferring acyl groups;GO:0090595//acetyl-CoA:L-lysine N6-acetyltransferase;GO:0016410//N-acyltransferase activity;GO:0003824//catalytic activity	GO:0044260//cellular macromolecule metabolic process;GO:0071840//cellular component organization or biogenesis;GO:0016569//covalent chromatin modification;GO:0043412//macromolecule modification;GO:0016570//histone modification;GO:0036211//protein modification process;GO:0071704//organic substance metabolic process;GO:1902589//single-organism organelle organization;GO:0044267//cellular protein met…
Unigene0000105	0	0	0	0	0	0	0	0	--	-	-	-	-
Unigene0000106	0.7057	0	0	0	4	0	0	0	--	-	-	-	-
Unigene0000107	0.8468	1.1597	0.4207	0.4611	4	5	2	2	--	-	-	-	-
Unigene0000108	1.2034	2.1425	1.6442	0.3277	8	13	11	2	--	-	-	-	-
Unigene0000109	1.8462	1.2137	3.3757	1.3674	25	15	46	17	PREDICTED: phosphatidylinositol 4-phosphate 5-kinase 5-like [Cucumis sativus]	ko04144//Endocytosis//Transport and catabolism//Cellular Processes;ko00562//Inositol phosphate metabolism//Carbohydrate metabolism//Metabolism;ko04070//Phosphatidylinositol signaling system//Signal transduction//Environmental Information Processing	GO:0005623//cell;GO:0044464//cell part	GO:0005488//binding;GO:0016301//kinase activity;GO:0001883//purine nucleoside binding;GO:0016307//phosphatidylinositol phosphate kinase activity;GO:0016773//phosphotransferase activity, alcohol group as acceptor;GO:0097367//carbohydrate derivative binding;GO:0036094//small molecule binding;GO:0016772//transferase activity, transferring phosphorus-containing groups;GO:0001882//nucleoside binding;G…	GO:0008152//metabolic process;GO:0016043//cellular component organization;GO:0044710//single-organism metabolic process;GO:0071704//organic substance metabolic process;GO:0044238//primary metabolic process;GO:0006650//glycerophospholipid metabolic process;GO:0046486//glycerolipid metabolic process;GO:0044699//single-organism process;GO:0032501//multicellular organismal process;GO:0009987//cellula…
Unigene0000110	0.7655	1.1183	1.2678	0	3	4	5	0	--	-	-	-	-
Unigene0000111	0	0	0	0	0	0	0	0	--	-	-	-	-
Unigene0000112	0	0	0	0	0	0	0	0	--	-	-	-	-
Unigene0000113	2.4044	1.9758	3.0952	1.5474	44	33	57	26	PREDICTED: U11/U12 small nuclear ribonucleoprotein 25 kDa protein-like isoform X2 [Cucumis melo]	-	-	-	-
Unigene0000114	1.6134	1.0101	1.1452	0.5021	7	4	5	2	--	-	-	-	-
Unigene0000115	0.9219	0.2525	0	1.7572	4	1	0	7	--	-	-	-	-
Unigene0000116	4.1471	1.5003	2.0994	1.2783	106	35	54	30	LINE-1 reverse transcriptase like [Glycine soja]	-	-	-	-
Unigene0000117	1.2932	0.5668	1.028	0	5	2	4	0	--	-	-	-	-
Unigene0000118	2.5404	0.5567	1.2622	0.1383	20	4	10	1	--	-	-	-	-
Unigene0000119	8.7327	40.9897	33.4289	6.8091	88	377	339	63	Chaperone protein dnaJ-related [Theobroma cacao]	-	-	GO:0005488//binding;GO:0005515//protein binding	-
Unigene0000120	6.5995	9.86	3.9565	4.7523	121	165	73	80	BnaC08g23690D [Brassica napus]	-	-	-	-
Unigene0000121	3.3623	0.4334	0.7862	0	17	2	4	0	OSJNBa0061G20.2 [Oryza sativa Japonica Group]	-	GO:0043227//membrane-bounded organelle;GO:0005622//intracellular;GO:0043229//intracellular organelle;GO:0043231//intracellular membrane-bounded organelle;GO:0044424//intracellular part;GO:0043226//organelle;GO:0044464//cell part;GO:0005623//cell	GO:0043169//cation binding;GO:0046914//transition metal ion binding;GO:0005488//binding;GO:0043167//ion binding;GO:0046872//metal ion binding;GO:0097159//organic cyclic compound binding	GO:0044237//cellular metabolic process;GO:0009987//cellular process;GO:0034641//cellular nitrogen compound metabolic process;GO:0090304//nucleic acid metabolic process;GO:0008152//metabolic process;GO:0046483//heterocycle metabolic process;GO:0006807//nitrogen compound metabolic process;GO:0006259//DNA metabolic process;GO:0043170//macromolecule metabolic process;GO:0044238//primary metabolic pro…
Unigene0000122	0.8375	0.6882	0.6242	0	4	3	3	0	--	-	-	-	-
Unigene0000123	4.622	1.0128	1.3779	0	30	6	9	0	PREDICTED: classical arabinogalactan protein 26 [Cucumis sativus]	-	-	-	-
Unigene0000124	0.674	0.5908	2.4113	0.881	5	4	18	6	CTV.20 [Citrus trifoliata]	-	-	GO:0043169//cation binding;GO:0046872//metal ion binding;GO:0003824//catalytic activity;GO:0043167//ion binding;GO:0005488//binding	GO:0044238//primary metabolic process;GO:0043170//macromolecule metabolic process;GO:0071704//organic substance metabolic process;GO:0008152//metabolic process
Unigene0000125	1.3807	0.6051	0.5488	0.3007	5	2	2	1	PREDICTED: LOW QUALITY PROTEIN: probable LRR receptor-like serine/threonine-protein kinase At1g53440 [Cucumis sativus]	-	-	GO:0016773//phosphotransferase activity, alcohol group as acceptor;GO:0003824//catalytic activity;GO:0016740//transferase activity;GO:0004672//protein kinase activity;GO:0016301//kinase activity;GO:0016772//transferase activity, transferring phosphorus-containing groups	-
Unigene0000126	2.0302	0.6844	2.3278	0	13	4	15	0	--	-	-	-	-
Unigene0000127	0	3.7293	1.0497	1.6618	0	29	9	13	cytochrome c oxidase subunit 3 (mitochondrion) (mitochondrion) [Chlorella sp. ArM0029B]	ko00190//Oxidative phosphorylation//Energy metabolism//Metabolism	GO:0043229//intracellular organelle;GO:0043226//organelle;GO:0005623//cell;GO:0044464//cell part;GO:0043227//membrane-bounded organelle;GO:0044424//intracellular part;GO:0043231//intracellular membrane-bounded organelle;GO:0005622//intracellular;GO:0016020//membrane	GO:0003824//catalytic activity;GO:0016491//oxidoreductase activity	GO:0022900//electron transport chain;GO:0044237//cellular metabolic process;GO:0055114//oxidation-reduction process;GO:0009987//cellular process;GO:0045333//cellular respiration;GO:0044710//single-organism metabolic process;GO:0022904//respiratory electron transport chain;GO:0008152//metabolic process;GO:0015980//energy derivation by oxidation of organic compounds;GO:0006091//generation of precur…
Unigene0000128	1.8379	4.4301	0.7305	0.6005	10	22	4	3	paraquat downregulated protein [Arabidopsis thaliana]	-	-	-	-
Unigene0000129	54.4077	29.5782	116.746	152.556	1048	520	2263	2698	PREDICTED: ethylene-responsive transcription factor RAP2-3 isoform X1 [Cucumis melo]	-	-	-	GO:0050789//regulation of biological process;GO:0019222//regulation of metabolic process;GO:0065007//biological regulation;GO:0060255//regulation of macromolecule metabolic process;GO:0009987//cellular process;GO:0010468//regulation of gene expression
Unigene0000130	2.0056	0	0.9965	0	8	0	4	0	--	-	-	-	-
Unigene0000131	1.2337	1.3516	1.2259	0	6	6	6	0	--	-	-	-	-
Unigene0000132	0.2086	0	0	0	3	0	0	0	--	-	-	-	-
Unigene0000133	0	0	0	0	0	0	0	0	--	-	-	-	-
Unigene0000134	0.5996	0.8759	1.7874	0	3	4	9	0	--	-	-	-	-
Unigene0000135	0.783	0	0.5187	2.5584	3	0	2	9	--	-	-	-	-
Unigene0000136	0	0	0	0	0	0	0	0	PREDICTED: cell wall integrity and stress response component 1 isoform X1 [Cucumis melo]	-	-	-	-
Unigene0000137	4.2127	3.9863	4.3765	5.4225	44	38	46	52	senescence-associated family protein [Populus trichocarpa]	-	-	-	-
Unigene0000138	0	0.1427	0.3882	0.5672	0	1	3	4	senescence-associated family protein [Populus trichocarpa]	-	-	-	-
Unigene0000139	0	0.5376	0.7313	0	0	2	3	0	--	-	-	-	-
Unigene0000140	0.2349	0.2574	0.1297	0.1421	9	9	5	5	PREDICTED: probable serine/threonine-protein kinase At1g01540 [Cucumis sativus]	-	-	GO:0003824//catalytic activity;GO:0032549//ribonucleoside binding;GO:0016773//phosphotransferase activity, alcohol group as acceptor;GO:0004702//receptor signaling protein serine/threonine kinase activity;GO:0060089//molecular transducer activity;GO:0004674//protein serine/threonine kinase activity;GO:0005488//binding;GO:0001883//purine nucleoside binding;GO:1901363//heterocyclic compound binding…	GO:0065009//regulation of molecular function;GO:0050790//regulation of catalytic activity;GO:0050794//regulation of cellular process;GO:0045937//positive regulation of phosphate metabolic process;GO:0001932//regulation of protein phosphorylation;GO:0051246//regulation of protein metabolic process;GO:0050896//response to stimulus;GO:0032147//activation of protein kinase activity;GO:0051247//positi…
Unigene0000141	1.6323	1.0731	1.4058	0.5926	60	36	52	20	PREDICTED: probable serine/threonine-protein kinase At1g01540 [Cucumis sativus]	-	-	GO:0036094//small molecule binding;GO:0003824//catalytic activity;GO:0097159//organic cyclic compound binding;GO:1901363//heterocyclic compound binding;GO:0097367//carbohydrate derivative binding;GO:0004871//signal transducer activity;GO:0001883//purine nucleoside binding;GO:0016772//transferase activity, transferring phosphorus-containing groups;GO:0005057//receptor signaling protein activity;GO…	GO:0001934//positive regulation of protein phosphorylation;GO:0051246//regulation of protein metabolic process;GO:0032147//activation of protein kinase activity;GO:0010604//positive regulation of macromolecule metabolic process;GO:0065007//biological regulation;GO:0051174//regulation of phosphorus metabolic process;GO:0050789//regulation of biological process;GO:0051716//cellular response to stim…
Unigene0000142	0	2.8004	0.6927	0	0	11	3	0	--	-	-	-	-
Unigene0000143	0.6247	0.5867	0.7094	0.5346	14	12	16	11	PREDICTED: prolycopene isomerase, chloroplastic [Cucumis sativus]	-	GO:0009536//plastid;GO:0043229//intracellular organelle;GO:0005737//cytoplasm;GO:0044424//intracellular part;GO:0043227//membrane-bounded organelle;GO:0005622//intracellular;GO:0044464//cell part;GO:0044444//cytoplasmic part;GO:0043231//intracellular membrane-bounded organelle;GO:0043226//organelle;GO:0005623//cell	GO:0016627//oxidoreductase activity, acting on the CH-CH group of donors;GO:0016491//oxidoreductase activity;GO:0003824//catalytic activity	GO:0016109//tetraterpenoid biosynthetic process;GO:1901576//organic substance biosynthetic process;GO:0044249//cellular biosynthetic process;GO:0006629//lipid metabolic process;GO:0016101//diterpenoid metabolic process;GO:0016114//terpenoid biosynthetic process;GO:0044699//single-organism process;GO:0016108//tetraterpenoid metabolic process;GO:0044711//single-organism biosynthetic process;GO:0008…
Unigene0000144	0	0	0.2307	0	0	0	4	0	PREDICTED: prolycopene isomerase, chloroplastic [Cucumis sativus]	-	GO:0005622//intracellular;GO:0043229//intracellular organelle;GO:0005623//cell;GO:0043231//intracellular membrane-bounded organelle;GO:0044444//cytoplasmic part;GO:0043226//organelle;GO:0009536//plastid;GO:0043227//membrane-bounded organelle;GO:0044424//intracellular part;GO:0044464//cell part;GO:0005737//cytoplasm	GO:0016627//oxidoreductase activity, acting on the CH-CH group of donors;GO:0016491//oxidoreductase activity;GO:0003824//catalytic activity	GO:0044255//cellular lipid metabolic process;GO:0016109//tetraterpenoid biosynthetic process;GO:0044699//single-organism process;GO:0044710//single-organism metabolic process;GO:0044238//primary metabolic process;GO:0016114//terpenoid biosynthetic process;GO:0006629//lipid metabolic process;GO:0044763//single-organism cellular process;GO:1901576//organic substance biosynthetic process;GO:0071704/…
Unigene0000145	2.7382	8.3439	6.1221	2.2367	32	89	72	24	BnaC03g00880D [Brassica napus]	-	-	-	-
Unigene0000146	1.9847	0.2899	1.1833	1.0088	15	2	9	7	PREDICTED: probable GPI-anchored adhesin-like protein PGA55 isoform X1 [Cucumis melo]	-	-	-	-
Unigene0000147	0	0	0	0	0	0	0	0	PREDICTED: 4-hydroxy-3-methylbut-2-enyl diphosphate reductase, chloroplastic-like isoform X2 [Cucumis melo]	ko00900//Terpenoid backbone biosynthesis//Metabolism of terpenoids and polyketides//Metabolism	-	GO:0016726//oxidoreductase activity, acting on CH or CH2 groups, NAD or NADP as acceptor;GO:0043169//cation binding;GO:0016491//oxidoreductase activity;GO:0016725//oxidoreductase activity, acting on CH or CH2 groups;GO:0003824//catalytic activity;GO:0043167//ion binding;GO:0005488//binding	GO:0008152//metabolic process;GO:0044281//small molecule metabolic process;GO:0044237//cellular metabolic process;GO:0044710//single-organism metabolic process;GO:0044238//primary metabolic process;GO:0044249//cellular biosynthetic process;GO:0009058//biosynthetic process;GO:0044255//cellular lipid metabolic process;GO:0090407//organophosphate biosynthetic process;GO:0006082//organic acid metabol…
Unigene0000148	0	0	0	0	0	0	0	0	PREDICTED: 4-hydroxy-3-methylbut-2-enyl diphosphate reductase, chloroplastic-like isoform X1 [Cucumis sativus]	ko00900//Terpenoid backbone biosynthesis//Metabolism of terpenoids and polyketides//Metabolism	-	GO:0016726//oxidoreductase activity, acting on CH or CH2 groups, NAD or NADP as acceptor;GO:0043167//ion binding;GO:0016491//oxidoreductase activity;GO:0003824//catalytic activity;GO:0043169//cation binding;GO:0016725//oxidoreductase activity, acting on CH or CH2 groups;GO:0005488//binding	GO:0032787//monocarboxylic acid metabolic process;GO:0008654//phospholipid biosynthetic process;GO:0009058//biosynthetic process;GO:0044249//cellular biosynthetic process;GO:0006796//phosphate-containing compound metabolic process;GO:0019637//organophosphate metabolic process;GO:0044237//cellular metabolic process;GO:0006793//phosphorus metabolic process;GO:0044238//primary metabolic process;GO:0…
Unigene0000149	0	0	0	0	0	0	0	0	PREDICTED: 4-hydroxy-3-methylbut-2-enyl diphosphate reductase, chloroplastic-like isoform X1 [Cucumis sativus]	ko00900//Terpenoid backbone biosynthesis//Metabolism of terpenoids and polyketides//Metabolism	-	GO:0016726//oxidoreductase activity, acting on CH or CH2 groups, NAD or NADP as acceptor;GO:0016491//oxidoreductase activity;GO:0003824//catalytic activity;GO:0043169//cation binding;GO:0005488//binding;GO:0043167//ion binding;GO:0016725//oxidoreductase activity, acting on CH or CH2 groups	GO:0006629//lipid metabolic process;GO:0006796//phosphate-containing compound metabolic process;GO:0044237//cellular metabolic process;GO:0090407//organophosphate biosynthetic process;GO:0044281//small molecule metabolic process;GO:0044710//single-organism metabolic process;GO:0008152//metabolic process;GO:0009987//cellular process;GO:0019637//organophosphate metabolic process;GO:0006090//pyruvat…
Unigene0000150	2.3071	2.1486	2.4072	2.5756	40	34	42	41	DNA binding protein [Cucumis melo subsp. melo]	-	-	-	-
Unigene0000151	0.4865	0	0.4834	0.7947	2	0	2	3	PREDICTED: psbQ-like protein 3, chloroplastic [Cucumis sativus]	-	GO:0009521//photosystem;GO:0009507//chloroplast;GO:0044424//intracellular part;GO:0005622//intracellular;GO:0043234//protein complex;GO:0005737//cytoplasm;GO:0043231//intracellular membrane-bounded organelle;GO:0016020//membrane;GO:0044436//thylakoid part;GO:0034357//photosynthetic membrane;GO:0032991//macromolecular complex;GO:0009536//plastid;GO:0044444//cytoplasmic part;GO:0043226//organelle;G…	GO:0043169//cation binding;GO:0043167//ion binding;GO:0046872//metal ion binding;GO:0005488//binding	GO:0008152//metabolic process;GO:0044237//cellular metabolic process;GO:0009987//cellular process
Unigene0000152	0.6551	0	0.3255	0	4	0	2	0	PREDICTED: probable glutathione peroxidase 8 [Cucumis sativus]	ko00480//Glutathione metabolism//Metabolism of other amino acids//Metabolism;ko00590//Arachidonic acid metabolism//Lipid metabolism//Metabolism	GO:0044464//cell part;GO:0005623//cell;GO:0005622//intracellular;GO:0044444//cytoplasmic part;GO:0043231//intracellular membrane-bounded organelle;GO:0043226//organelle;GO:0043227//membrane-bounded organelle;GO:0044424//intracellular part;GO:0043229//intracellular organelle;GO:0005737//cytoplasm	GO:0043167//ion binding;GO:0016209//antioxidant activity;GO:0003824//catalytic activity;GO:0043169//cation binding;GO:0005488//binding;GO:0016491//oxidoreductase activity;GO:0016684//oxidoreductase activity, acting on peroxide as acceptor;GO:0004601//peroxidase activity	GO:0009404//toxin metabolic process;GO:0044237//cellular metabolic process;GO:0008152//metabolic process;GO:0044710//single-organism metabolic process;GO:0044763//single-organism cellular process;GO:0050896//response to stimulus;GO:0044699//single-organism process;GO:0009987//cellular process;GO:0006950//response to stress;GO:0019748//secondary metabolic process
Unigene0000153	12.8342	11.5923	11.9447	5.7277	205	169	192	84	PREDICTED: probable glutathione peroxidase 8 [Cucumis melo]	ko00480//Glutathione metabolism//Metabolism of other amino acids//Metabolism;ko00590//Arachidonic acid metabolism//Lipid metabolism//Metabolism	GO:0005737//cytoplasm;GO:0044444//cytoplasmic part;GO:0005622//intracellular;GO:0043227//membrane-bounded organelle;GO:0005623//cell;GO:0044464//cell part;GO:0043226//organelle;GO:0043229//intracellular organelle;GO:0044424//intracellular part;GO:0043231//intracellular membrane-bounded organelle	GO:0005488//binding;GO:0016209//antioxidant activity;GO:0004601//peroxidase activity;GO:0016491//oxidoreductase activity;GO:0003824//catalytic activity;GO:0043169//cation binding;GO:0043167//ion binding;GO:0016684//oxidoreductase activity, acting on peroxide as acceptor	GO:0006950//response to stress;GO:0044763//single-organism cellular process;GO:0019748//secondary metabolic process;GO:0009987//cellular process;GO:0050896//response to stimulus;GO:0008152//metabolic process;GO:0044237//cellular metabolic process;GO:0044699//single-organism process;GO:0044710//single-organism metabolic process;GO:0009404//toxin metabolic process
Unigene0000154	0	1.685	2.2924	0.5583	0	6	9	2	PREDICTED: UDP-glycosyltransferase 91A1-like [Camelina sativa]	-	-	GO:0016740//transferase activity;GO:0003824//catalytic activity;GO:0016757//transferase activity, transferring glycosyl groups	-
Unigene0000155	0.3942	0	0.1959	1.7174	2	0	1	8	Nucleotide-diphospho-sugar transferase family protein [Theobroma cacao]	-	-	GO:0003824//catalytic activity	-
Unigene0000156	25.651	8.8517	14.0494	12.099	127	40	70	55	--	-	-	-	-
Unigene0000157	23.3698	8.8476	13.3494	15.1989	628	217	361	375	PREDICTED: probable E3 ubiquitin-protein ligase LOG2 [Cucumis sativus]	-	-	GO:0046914//transition metal ion binding;GO:0046872//metal ion binding;GO:0005488//binding;GO:0043169//cation binding;GO:0043167//ion binding	-
Unigene0000158	0.2441	0.0446	0.0404	0.0886	6	1	1	2	PREDICTED: probable E3 ubiquitin-protein ligase LOG2 [Cucumis sativus]	-	-	GO:0043167//ion binding;GO:0046914//transition metal ion binding;GO:0005488//binding;GO:0046872//metal ion binding;GO:0043169//cation binding	-
Unigene0000159	0.4536	1.9881	0.9016	2.4704	2	8	4	10	PREDICTED: late embryogenesis abundant protein D-34-like [Fragaria vesca subsp. vesca]	-	-	-	-
Unigene0000160	1.1725	0.3212	1.3108	2.8733	8	2	9	18	PREDICTED: pentatricopeptide repeat-containing protein At5g04780 [Cucumis melo]	-	-	GO:0016462//pyrophosphatase activity;GO:0016887//ATPase activity;GO:0042623//ATPase activity, coupled;GO:0016787//hydrolase activity;GO:0016818//hydrolase activity, acting on acid anhydrides, in phosphorus-containing anhydrides;GO:0003824//catalytic activity;GO:0016817//hydrolase activity, acting on acid anhydrides;GO:0017111//nucleoside-triphosphatase activity	-
Unigene0000161	0	0	0.5211	4.8547	0	0	2	17	hypothetical protein Csa_4G022250 [Cucumis sativus]	-	-	-	-
Unigene0000162	1.3609	0	0.2705	0	5	0	1	0	--	-	-	-	-
Unigene0000163	14.4195	13.8664	8.7622	8.022	139	122	85	71	thylakoid soluble phosphoprotein [Spinacia oleracea]	-	GO:0043231//intracellular membrane-bounded organelle;GO:0005622//intracellular;GO:0044444//cytoplasmic part;GO:0043229//intracellular organelle;GO:0031984//organelle subcompartment;GO:0031976//plastid thylakoid;GO:0009507//chloroplast;GO:0044424//intracellular part;GO:0009526//plastid envelope;GO:0043227//membrane-bounded organelle;GO:0005737//cytoplasm;GO:0044464//cell part;GO:0043226//organelle…	-	GO:0051179//localization;GO:0006812//cation transport;GO:0051234//establishment of localization;GO:0006725//cellular aromatic compound metabolic process;GO:0043170//macromolecule metabolic process;GO:1902578//single-organism localization;GO:0050801//ion homeostasis;GO:0006811//ion transport;GO:0009628//response to abiotic stimulus;GO:0044237//cellular metabolic process;GO:0009314//response to rad…
Unigene0000164	0	0	0	0	0	0	0	0	--	-	-	-	-
Unigene0000165	0	0	0	0	0	0	0	0	--	-	-	-	-
Unigene0000166	1.4954	1.2744	2.1465	0	9	7	13	0	--	-	-	-	-
Unigene0000167	3.1615	4.4337	5.2778	5.7847	25	32	42	42	glycine-rich family protein [Populus trichocarpa]	-	GO:0044425//membrane part;GO:0031224//intrinsic component of membrane;GO:0016020//membrane	-	-
Unigene0000168	0.5595	0.8173	2.4091	0.6093	6	8	26	6	PREDICTED: G-type lectin S-receptor-like serine/threonine-protein kinase RLK1-like [Citrus sinensis]	-	-	GO:0016740//transferase activity;GO:0016773//phosphotransferase activity, alcohol group as acceptor;GO:1901363//heterocyclic compound binding;GO:0016301//kinase activity;GO:0005488//binding;GO:0004672//protein kinase activity;GO:0003824//catalytic activity;GO:0036094//small molecule binding;GO:0097159//organic cyclic compound binding;GO:0016772//transferase activity, transferring phosphorus-conta…	GO:0006464//cellular protein modification process;GO:0009987//cellular process;GO:0043412//macromolecule modification;GO:0043170//macromolecule metabolic process;GO:0044267//cellular protein metabolic process;GO:0019538//protein metabolic process;GO:0044237//cellular metabolic process;GO:0006796//phosphate-containing compound metabolic process;GO:0008152//metabolic process;GO:0006793//phosphorus …
Unigene0000169	31.1936	23.9144	27.7937	37.0113	716	501	642	780	PREDICTED: HAUS augmin-like complex subunit 1 [Gossypium raimondii]	-	GO:0044464//cell part;GO:0044424//intracellular part;GO:0005875//microtubule associated complex;GO:0043234//protein complex;GO:0044430//cytoskeletal part;GO:0043226//organelle;GO:0015630//microtubule cytoskeleton;GO:0005856//cytoskeleton;GO:0043229//intracellular organelle;GO:0032991//macromolecular complex;GO:0043232//intracellular non-membrane-bounded organelle;GO:0044422//organelle part;GO:000…	-	GO:0044763//single-organism cellular process;GO:0071822//protein complex subunit organization;GO:0016043//cellular component organization;GO:0009987//cellular process;GO:0007010//cytoskeleton organization;GO:0022607//cellular component assembly;GO:0000226//microtubule cytoskeleton organization;GO:0065003//macromolecular complex assembly;GO:0044699//single-organism process;GO:0007017//microtubule-…
Unigene0000170	2.4519	1.1753	0.9137	0.1669	16	7	6	1	--	-	-	-	-
Unigene0000171	12.0107	3.6466	8.2683	9.9293	166	46	115	126	hypothetical protein Csa_6G497320 [Cucumis sativus]	-	-	-	-
Unigene0000172	0.7086	0.2588	1.8777	0	3	1	8	0	--	-	-	-	-
Unigene0000173	0	1.9725	0.4472	1.1438	0	12	3	7	PREDICTED: pentatricopeptide repeat-containing protein At3g48810 [Cucumis melo]	-	-	-	-
Unigene0000174	2.7219	0.1988	2.7047	0.3953	15	1	15	2	--	-	-	-	-
Unigene0000175	1.3205	0	3.3742	0	7	0	18	0	--	-	-	-	-
Unigene0000176	0.1524	4.0081	2.3477	1.7431	2	48	31	21	PREDICTED: beta-galactosidase 5 [Cucumis sativus]	-	GO:0005576//extracellular region	GO:0005488//binding;GO:0004553//hydrolase activity, hydrolyzing O-glycosyl compounds;GO:0016787//hydrolase activity;GO:0003824//catalytic activity;GO:0016798//hydrolase activity, acting on glycosyl bonds;GO:0015925//galactosidase activity	GO:0050793//regulation of developmental process;GO:0006576//cellular biogenic amine metabolic process;GO:0042546//cell wall biogenesis;GO:0071704//organic substance metabolic process;GO:0071555//cell wall organization;GO:0044085//cellular component biogenesis;GO:0065007//biological regulation;GO:0009308//amine metabolic process;GO:2000026//regulation of multicellular organismal development;GO:190…
Unigene0000177	0.3216	1.057	3.1156	1.0507	4	12	39	12	PREDICTED: beta-galactosidase 5-like [Cucumis melo]	-	GO:0005576//extracellular region	GO:0003824//catalytic activity;GO:0004553//hydrolase activity, hydrolyzing O-glycosyl compounds;GO:0016787//hydrolase activity;GO:0016798//hydrolase activity, acting on glycosyl bonds;GO:0015925//galactosidase activity;GO:0005488//binding	GO:0008152//metabolic process;GO:0006807//nitrogen compound metabolic process;GO:2000026//regulation of multicellular organismal development;GO:0006576//cellular biogenic amine metabolic process;GO:0016043//cellular component organization;GO:0009987//cellular process;GO:0044085//cellular component biogenesis;GO:1901564//organonitrogen compound metabolic process;GO:0006595//polyamine metabolic pro…
Unigene0000178	13.42	13.77	24.766	29.3101	189	177	351	379	Mitochondrial import inner membrane translocase subunit tim-10 isoform 1 [Theobroma cacao]	-	-	-	GO:0048869//cellular developmental process;GO:0051252//regulation of RNA metabolic process;GO:1903506//regulation of nucleic acid-templated transcription;GO:0009653//anatomical structure morphogenesis;GO:0044707//single-multicellular organism process;GO:0019219//regulation of nucleobase-containing compound metabolic process;GO:0044699//single-organism process;GO:0048513//organ development;GO:0007…
Unigene0000179	1.3355	0.5853	0	0	5	2	0	0	ty3-gypsy retroelement transposase [Cucumis melo subsp. melo]	-	-	-	-
Unigene0000180	1.1908	4.7444	0.753	0.7074	11	40	7	6	PREDICTED: LOW QUALITY PROTEIN: protein SUPPRESSOR OF npr1-1, CONSTITUTIVE 1-like [Cucumis sativus]	-	-	GO:0001882//nucleoside binding;GO:0032549//ribonucleoside binding;GO:0036094//small molecule binding;GO:0097159//organic cyclic compound binding;GO:0005488//binding;GO:0097367//carbohydrate derivative binding;GO:1901363//heterocyclic compound binding;GO:0032550//purine ribonucleoside binding;GO:0001883//purine nucleoside binding	GO:0050794//regulation of cellular process;GO:0050789//regulation of biological process;GO:0065007//biological regulation
Unigene0000181	1.214	0.8867	0.9048	1.212	12	8	9	11	unnamed protein product [Oryza sativa Japonica Group]	-	-	-	-
Unigene0000182	0.0482	0	0.0958	0	2	0	4	0	PREDICTED: bifunctional aspartokinase/homoserine dehydrogenase 1, chloroplastic [Cucumis sativus]	ko01230//Biosynthesis of amino acids//Global and Overview//Metabolism;ko00270//Cysteine and methionine metabolism//Amino acid metabolism//Metabolism;ko00260//Glycine, serine and threonine metabolism//Amino acid metabolism//Metabolism;ko00300//Lysine biosynthesis//Amino acid metabolism//Metabolism;ko00261//Monobactam biosynthesis//Biosynthesis of other secondary metabolites//Metabolism	GO:0044444//cytoplasmic part;GO:0043229//intracellular organelle;GO:0043226//organelle;GO:0005622//intracellular;GO:0005623//cell;GO:0043227//membrane-bounded organelle;GO:0044424//intracellular part;GO:0009536//plastid;GO:0005737//cytoplasm;GO:0043231//intracellular membrane-bounded organelle;GO:0044464//cell part	GO:0016491//oxidoreductase activity;GO:1901363//heterocyclic compound binding;GO:0003824//catalytic activity;GO:0000166//nucleotide binding;GO:0016774//phosphotransferase activity, carboxyl group as acceptor;GO:0016616//oxidoreductase activity, acting on the CH-OH group of donors, NAD or NADP as acceptor;GO:0016740//transferase activity;GO:0016772//transferase activity, transferring phosphorus-co…	GO:0006807//nitrogen compound metabolic process;GO:0006520//cellular amino acid metabolic process;GO:0044699//single-organism process;GO:0019752//carboxylic acid metabolic process;GO:0043436//oxoacid metabolic process;GO:0044281//small molecule metabolic process;GO:0006793//phosphorus metabolic process;GO:0044238//primary metabolic process;GO:0044763//single-organism cellular process;GO:0044237//…
Unigene0000183	11.8844	15.0419	21.4085	18.3492	625	722	1133	886	PREDICTED: bifunctional aspartokinase/homoserine dehydrogenase 1, chloroplastic [Cucumis sativus]	ko01230//Biosynthesis of amino acids//Global and Overview//Metabolism;ko00270//Cysteine and methionine metabolism//Amino acid metabolism//Metabolism;ko00260//Glycine, serine and threonine metabolism//Amino acid metabolism//Metabolism;ko00300//Lysine biosynthesis//Amino acid metabolism//Metabolism;ko00261//Monobactam biosynthesis//Biosynthesis of other secondary metabolites//Metabolism	GO:0005623//cell;GO:0043226//organelle;GO:0005737//cytoplasm;GO:0043229//intracellular organelle;GO:0043227//membrane-bounded organelle;GO:0044424//intracellular part;GO:0044444//cytoplasmic part;GO:0009536//plastid;GO:0005622//intracellular;GO:0044464//cell part;GO:0043231//intracellular membrane-bounded organelle	GO:0036094//small molecule binding;GO:0016614//oxidoreductase activity, acting on CH-OH group of donors;GO:0003824//catalytic activity;GO:0000166//nucleotide binding;GO:0043167//ion binding;GO:0016491//oxidoreductase activity;GO:1901363//heterocyclic compound binding;GO:0043177//organic acid binding;GO:0016772//transferase activity, transferring phosphorus-containing groups;GO:0043168//anion bind…	GO:0044710//single-organism metabolic process;GO:0008152//metabolic process;GO:0044699//single-organism process;GO:0009987//cellular process;GO:1901564//organonitrogen compound metabolic process;GO:0006520//cellular amino acid metabolic process;GO:0044281//small molecule metabolic process;GO:0019752//carboxylic acid metabolic process;GO:0071704//organic substance metabolic process;GO:0006796//pho…
Unigene0000184	1.3449	0.7368	0.891	0	6	3	4	0	--	-	-	-	-
Unigene0000185	0.4314	0.4726	0	1.1746	2	2	0	5	PREDICTED: uncharacterized protein LOC104896379 [Beta vulgaris subsp. vulgaris]	-	-	-	-
Unigene0000186	0	0	0	0	0	0	0	0	PREDICTED: tRNA (guanine(10)-N2)-methyltransferase homolog [Cucumis melo]	-	-	GO:0005488//binding;GO:0016740//transferase activity;GO:0097159//organic cyclic compound binding;GO:0003824//catalytic activity;GO:0016741//transferase activity, transferring one-carbon groups	GO:0090304//nucleic acid metabolic process;GO:0044699//single-organism process;GO:0008152//metabolic process;GO:0009119//ribonucleoside metabolic process;GO:1901068//guanosine-containing compound metabolic process;GO:1901135//carbohydrate derivative metabolic process;GO:0034641//cellular nitrogen compound metabolic process;GO:0006807//nitrogen compound metabolic process;GO:0046128//purine ribonuc…
Unigene0000187	0.1803	0.5268	0.1792	0	6	16	6	0	PREDICTED: tRNA (guanine(10)-N2)-methyltransferase homolog [Cucumis melo]	-	-	GO:0003824//catalytic activity;GO:0097159//organic cyclic compound binding;GO:0016740//transferase activity;GO:0016741//transferase activity, transferring one-carbon groups;GO:0005488//binding	GO:0006399//tRNA metabolic process;GO:1902578//single-organism localization;GO:0071702//organic substance transport;GO:0008033//tRNA processing;GO:0042278//purine nucleoside metabolic process;GO:1901360//organic cyclic compound metabolic process;GO:0044237//cellular metabolic process;GO:0051641//cellular localization;GO:0006725//cellular aromatic compound metabolic process;GO:0044281//small molec…
Unigene0000188	0.2071	0.2269	4.013	0.9022	2	2	39	8	--	-	-	-	-
Unigene0000189	17.4917	15.837	19.2726	7.6922	478	395	530	193	PREDICTED: B-cell receptor-associated protein 31-like [Cucumis melo]	ko04141//Protein processing in endoplasmic reticulum//Folding, sorting and degradation//Genetic Information Processing	GO:0005623//cell;GO:0043227//membrane-bounded organelle;GO:0043231//intracellular membrane-bounded organelle;GO:0043226//organelle;GO:0044425//membrane part;GO:0044464//cell part;GO:0043229//intracellular organelle;GO:0031224//intrinsic component of membrane;GO:0044424//intracellular part;GO:0005622//intracellular;GO:0016020//membrane	-	GO:0008104//protein localization;GO:0033036//macromolecule localization;GO:0015031//protein transport;GO:0071702//organic substance transport;GO:0045184//establishment of protein localization;GO:0051179//localization;GO:0006810//transport;GO:0051234//establishment of localization
Unigene0000190	1.4665	3.1777	3.4002	4.2947	45	89	105	121	PREDICTED: protein MCM10 homolog isoform X3 [Cucumis melo]	-	GO:0043226//organelle;GO:0043229//intracellular organelle;GO:0044464//cell part;GO:0043231//intracellular membrane-bounded organelle;GO:0044424//intracellular part;GO:0005622//intracellular;GO:0005623//cell;GO:0043227//membrane-bounded organelle	-	GO:0006807//nitrogen compound metabolic process;GO:0090304//nucleic acid metabolic process;GO:0006139//nucleobase-containing compound metabolic process;GO:1901360//organic cyclic compound metabolic process;GO:0044238//primary metabolic process;GO:0044260//cellular macromolecule metabolic process;GO:0006259//DNA metabolic process;GO:0008152//metabolic process;GO:0044237//cellular metabolic process…
Unigene0000191	2.3039	2.0435	0.5451	0.8364	21	17	5	7	--	-	-	-	-
Unigene0000192	1.8074	0.7426	1.5715	0.2461	8	3	7	1	--	-	-	-	-
Unigene0000193	1.6648	0	0.8272	0.6044	6	0	3	2	--	-	-	-	-
Unigene0000194	0	0.3432	2.3342	0.3411	0	2	15	2	PREDICTED: pentatricopeptide repeat-containing protein At1g18485 [Cucumis melo]	-	-	-	-
Unigene0000195	0	0.7877	0	0	0	6	0	0	acid invertase [Lagenaria siceraria]	ko00500//Starch and sucrose metabolism//Carbohydrate metabolism//Metabolism;ko00052//Galactose metabolism//Carbohydrate metabolism//Metabolism	-	GO:0016787//hydrolase activity;GO:0004553//hydrolase activity, hydrolyzing O-glycosyl compounds;GO:0003824//catalytic activity;GO:0004564//beta-fructofuranosidase activity;GO:0016798//hydrolase activity, acting on glycosyl bonds	GO:0008152//metabolic process;GO:0044238//primary metabolic process
Unigene0000196	101.684	125.165	73.1073	87.6609	3823	4295	2766	3026	PREDICTED: acid beta-fructofuranosidase-like [Cucumis sativus]	ko00500//Starch and sucrose metabolism//Carbohydrate metabolism//Metabolism;ko00052//Galactose metabolism//Carbohydrate metabolism//Metabolism	-	GO:0003824//catalytic activity;GO:0004564//beta-fructofuranosidase activity;GO:0016798//hydrolase activity, acting on glycosyl bonds;GO:0004553//hydrolase activity, hydrolyzing O-glycosyl compounds;GO:0016787//hydrolase activity	GO:0008152//metabolic process;GO:0044238//primary metabolic process
Unigene0000197	1.4656	0.4014	0.9102	0.5986	8	2	5	3	--	-	-	-	-
Unigene0000198	11.67	6.6975	8.441	14.5261	147	77	107	168	PREDICTED: EPIDERMAL PATTERNING FACTOR-like protein 4 [Cucumis melo]	-	-	-	-
Unigene0000199	5.7515	7.0812	18.5011	29.8358	97	109	314	462	PREDICTED: sulfated surface glycoprotein 185-like [Pyrus x bretschneideri]	-	-	GO:0016757//transferase activity, transferring glycosyl groups;GO:0016763//transferase activity, transferring pentosyl groups;GO:0003824//catalytic activity;GO:0016740//transferase activity	-
Unigene0000200	0.8142	0.5353	2.751	0.1774	5	3	17	1	--	-	-	-	-
Unigene0000201	0.2652	0.2906	2.1086	2.6	2	2	16	18	Protein kinase domain containing protein, expressed [Oryza sativa Japonica Group]	-	GO:0005623//cell;GO:0044424//intracellular part;GO:0005622//intracellular;GO:0044464//cell part	-	-
Unigene0000202	6.2439	5.1725	6.4063	8.1274	123	93	127	147	PREDICTED: 3-hydroxybutyryl-CoA dehydratase-like protein, mitochondrial [Cucumis sativus]	-	-	-	-
Unigene0000203	313.892	444.801	520.917	613.009	5519	7138	9217	9896	PREDICTED: protein YLS9-like [Cucumis melo]	-	-	-	-
Unigene0000204	1.9231	2.107	1.3802	0.3491	18	18	13	3	--	-	-	-	-
Unigene0000205	0	0.7455	1.0143	0.5558	0	4	6	3	--	-	-	-	-
Unigene0000206	0	0	2.0918	0.1764	0	0	13	1	--	-	-	-	-
Unigene0000207	0.8931	0.9785	1.3312	0	4	4	6	0	PREDICTED: CRC domain-containing protein TSO1-like [Gossypium raimondii]	-	-	-	-
Unigene0000208	1.5844	2.003	0.2422	0	13	15	2	0	--	-	-	-	-
Unigene0000209	0	0.8989	0.5435	0.2979	0	3	2	1	PREDICTED: probable inactive receptor kinase At2g26730 [Prunus mume]	-	-	GO:0016301//kinase activity;GO:0016740//transferase activity;GO:0043167//ion binding;GO:1901363//heterocyclic compound binding;GO:0003824//catalytic activity;GO:0005488//binding;GO:0016772//transferase activity, transferring phosphorus-containing groups;GO:0097159//organic cyclic compound binding;GO:0036094//small molecule binding	GO:0009987//cellular process;GO:0071704//organic substance metabolic process;GO:0043412//macromolecule modification;GO:0036211//protein modification process;GO:0019538//protein metabolic process;GO:0006464//cellular protein modification process;GO:0006793//phosphorus metabolic process;GO:0044237//cellular metabolic process;GO:0044267//cellular protein metabolic process;GO:0008152//metabolic proce…
Unigene0000210	0.7902	0	1.3087	0	3	0	5	0	--	-	-	-	-
Unigene0000211	1.9518	0	0.5541	0	7	0	2	0	--	-	-	-	-
Unigene0000212	0.7571	0.8295	0.3762	0.4123	4	4	2	2	--	-	-	-	-
Unigene0000213	2.7843	1.4356	1.302	1.0703	17	8	8	6	--	-	-	-	-
Unigene0000214	4.2736	0.5853	2.1233	0.5818	16	2	8	2	--	-	-	-	-
Unigene0000215	1.9808	0.6201	0.9842	0	14	4	7	0	--	-	-	-	-
Unigene0000216	0.8727	0.7171	0.4336	0	4	3	2	0	--	-	-	-	-
Unigene0000217	1.5629	2.2017	0.8875	0.2432	7	9	4	1	--	-	-	-	-
Unigene0000218	0	1.1941	1.083	1.0552	0	9	9	8	T3P18.3 [Arabidopsis thaliana]	-	-	GO:0005488//binding	GO:0071704//organic substance metabolic process;GO:0044238//primary metabolic process;GO:0008152//metabolic process;GO:0043170//macromolecule metabolic process
Unigene0000219	0.5173	1.4169	1.2851	0	2	5	5	0	--	-	-	-	-
Unigene0000220	0	0	0	0	0	0	0	0	--	-	-	-	-
Unigene0000221	0	0	0	0	0	0	0	0	--	-	-	-	-
Unigene0000222	19.2183	47.7238	56.8816	37.275	698	1582	2079	1243	Octicosapeptide/Phox/Bem1p family protein [Theobroma cacao]	-	-	-	-
Unigene0000223	4.6003	2.3942	1.8286	0.7516	40	19	16	6	--	-	-	-	-
Unigene0000224	2.4188	0.5708	1.9969	1.7833	65	14	54	44	PREDICTED: LOW QUALITY PROTEIN: pentatricopeptide repeat-containing protein At4g31850, chloroplastic [Cucumis sativus]	-	-	-	GO:0008152//metabolic process;GO:0009987//cellular process;GO:0044238//primary metabolic process;GO:0044710//single-organism metabolic process;GO:0044699//single-organism process;GO:0044763//single-organism cellular process;GO:0044237//cellular metabolic process;GO:0043170//macromolecule metabolic process;GO:0071704//organic substance metabolic process
Unigene0000225	4.5867	2.4581	2.056	2.362	184	90	83	87	PREDICTED: pentatricopeptide repeat-containing protein At4g31850, chloroplastic [Cucumis melo]	-	-	-	GO:0044763//single-organism cellular process;GO:0009987//cellular process;GO:0043170//macromolecule metabolic process;GO:0044238//primary metabolic process;GO:0044237//cellular metabolic process;GO:0008152//metabolic process;GO:0044699//single-organism process;GO:0071704//organic substance metabolic process;GO:0044710//single-organism metabolic process
Unigene0000226	0.8365	1.222	0	0	3	4	0	0	--	-	-	-	-
Unigene0000227	1.3332	0.8216	0.7452	0.9983	32	18	18	22	PREDICTED: random slug protein 5 [Cucumis melo]	-	GO:0005623//cell;GO:0044464//cell part	-	GO:1901576//organic substance biosynthetic process;GO:1901360//organic cyclic compound metabolic process;GO:0019438//aromatic compound biosynthetic process;GO:0009699//phenylpropanoid biosynthetic process;GO:0019748//secondary metabolic process;GO:0051179//localization;GO:0009987//cellular process;GO:0008152//metabolic process;GO:0044237//cellular metabolic process;GO:0071704//organic substance m…
Unigene0000228	0.2448	0.1341	0.4054	0	6	3	10	0	PREDICTED: random slug protein 5 [Cucumis melo]	-	GO:0044464//cell part;GO:0005623//cell	-	GO:0009987//cellular process;GO:0019438//aromatic compound biosynthetic process;GO:0071704//organic substance metabolic process;GO:0044550//secondary metabolite biosynthetic process;GO:1901360//organic cyclic compound metabolic process;GO:0044699//single-organism process;GO:0044249//cellular biosynthetic process;GO:0008152//metabolic process;GO:0044763//single-organism cellular process;GO:0019748…
Unigene0000229	1.0207	0.1864	0.3381	1.6675	6	1	2	9	PREDICTED: lysosomal amino acid transporter 1 [Populus euphratica]	-	GO:0031224//intrinsic component of membrane;GO:0016020//membrane;GO:0044425//membrane part	-	-
Unigene0000230	0.3496	4.0219	0.1737	0	2	21	1	0	PREDICTED: protein FAR1-RELATED SEQUENCE 3-like [Cucumis melo]	-	-	-	-
Unigene0000231	0.2507	3.5708	0.7474	0	1	13	3	0	--	-	-	-	-
Unigene0000232	2.4744	1.6267	0.4918	0.8085	20	12	4	6	--	-	-	-	-
Unigene0000233	0.1958	1.5013	1.5562	0.8528	1	7	8	4	--	-	-	-	-
Unigene0000234	2.0948	0.1312	1.1895	0.1304	35	2	20	2	hypothetical protein PRUPE_ppb020328mg [Prunus persica]	-	-	-	-
Unigene0000235	0.3402	0	0	0	4	0	0	0	hypothetical protein PRUPE_ppb020328mg [Prunus persica]	-	-	-	-
Unigene0000236	1.7277	1.262	0.8584	0.3136	12	8	6	2	Os05g0296200, partial [Oryza sativa Japonica Group]	-	GO:0044464//cell part;GO:0043226//organelle;GO:0044424//intracellular part;GO:0005623//cell;GO:0005622//intracellular;GO:0043227//membrane-bounded organelle;GO:0043231//intracellular membrane-bounded organelle;GO:0043229//intracellular organelle	-	-
Unigene0000237	21.2225	20.586	24.7444	23.4226	375	332	440	380	PREDICTED: DNL-type zinc finger protein [Cucumis melo]	-	-	GO:0005488//binding;GO:0046872//metal ion binding;GO:0046914//transition metal ion binding;GO:0043167//ion binding;GO:0043169//cation binding	-
Unigene0000238	0.6999	2.3006	1.1592	0	3	9	5	0	--	-	-	-	-
Unigene0000239	2.492	0.6826	0.9286	0.6785	16	4	6	4	--	-	-	-	-
Unigene0000240	0.5244	2.0109	1.1725	1.1423	4	14	9	8	--	-	-	-	-
Unigene0000241	0.6825	1.3086	1.1869	1.6725	4	7	7	9	--	-	-	-	-
Unigene0000242	0.5165	1.3204	1.3687	0	3	7	8	0	PREDICTED: uncharacterized protein LOC105420238 [Amborella trichopoda]	-	-	-	-
Unigene0000243	1.1153	0.3055	1.6624	0.3037	4	1	6	1	--	-	-	-	-
Unigene0000244	0.5386	8.6305	1.6725	1.0999	8	117	25	15	Beta-1,3-glucosyltransferase [Gossypium arboreum]	-	-	GO:0003824//catalytic activity;GO:0016740//transferase activity	-
Unigene0000245	0.2456	5.0451	1.0372	0.8693	4	75	17	13	transferring glycosyl group transferase [Medicago truncatula]	-	-	-	-
Unigene0000246	0.9269	1.4387	3.7611	0.8413	12	17	49	10	PREDICTED: sugar transport protein 13-like [Cucumis sativus]	-	GO:0044425//membrane part;GO:0031224//intrinsic component of membrane;GO:0005911//cell-cell junction;GO:0030054//cell junction;GO:0016020//membrane	GO:0022804//active transmembrane transporter activity;GO:0016628//oxidoreductase activity, acting on the CH-CH group of donors, NAD or NADP as acceptor;GO:0005351//sugar:proton symporter activity;GO:0022891//substrate-specific transmembrane transporter activity;GO:0015291//secondary active transmembrane transporter activity;GO:0005402//cation:sugar symporter activity;GO:0015295//solute:proton sym…	GO:0071705//nitrogen compound transport;GO:0006810//transport;GO:0051234//establishment of localization;GO:0008645//hexose transport;GO:0046942//carboxylic acid transport;GO:0008643//carbohydrate transport;GO:1902578//single-organism localization;GO:0015749//monosaccharide transport;GO:0044763//single-organism cellular process;GO:0006811//ion transport;GO:0009987//cellular process;GO:0044765//sin…
Unigene0000247	2.341	0	0.3877	0.4249	12	0	2	2	--	-	-	-	-
Unigene0000248	0.6545	0	0.6504	0.4752	3	0	3	2	PREDICTED: DEAD-box ATP-dependent RNA helicase 30 isoform X2 [Cucumis melo]	ko03040//Spliceosome//Transcription//Genetic Information Processing	-	GO:0036094//small molecule binding;GO:0097159//organic cyclic compound binding;GO:0032550//purine ribonucleoside binding;GO:1901363//heterocyclic compound binding;GO:0097367//carbohydrate derivative binding;GO:0001883//purine nucleoside binding;GO:0001882//nucleoside binding;GO:0032549//ribonucleoside binding;GO:0016817//hydrolase activity, acting on acid anhydrides;GO:0016818//hydrolase activity…	-
Unigene0000249	2.854	6.4276	4.648	1.9859	36	74	59	23	PREDICTED: 36.4 kDa proline-rich protein [Cucumis melo]	-	-	-	-
Unigene0000250	0.3184	0.3489	2.6897	2.2544	2	2	17	13	PREDICTED: zinc finger BED domain-containing protein DAYSLEEPER-like [Cucumis sativus]	-	-	GO:0097159//organic cyclic compound binding;GO:0005515//protein binding;GO:0003676//nucleic acid binding;GO:0005488//binding;GO:1901363//heterocyclic compound binding	-
Unigene0000251	0.2939	0.644	2.6283	0.3201	2	4	18	2	PREDICTED: zinc finger BED domain-containing protein DAYSLEEPER-like [Cucumis sativus]	-	-	GO:0097159//organic cyclic compound binding;GO:0003676//nucleic acid binding;GO:1901363//heterocyclic compound binding;GO:0005515//protein binding;GO:0005488//binding	-
Unigene0000252	1.0992	0	1.5604	1.1972	7	0	10	7	--	-	-	-	-
Unigene0000253	2.202	1.7089	1.8234	0.0999	24	17	20	1	--	-	-	-	-
Unigene0000254	2.2198	1.216	0.3676	1.4103	12	6	2	7	--	-	-	-	-
Unigene0000255	0	0	2.2872	0.4178	0	0	12	2	PREDICTED: LOW QUALITY PROTEIN: protein NRT1/ PTR FAMILY 5.2-like [Cucumis melo]	-	-	-	GO:0051179//localization;GO:0051234//establishment of localization
Unigene0000256	0	2.7555	0.2272	0	0	11	1	0	--	-	-	-	-
Unigene0000257	1.5768	0.216	0.5876	0.644	8	1	3	3	--	-	-	-	-
Unigene0000258	2.5981	0	0.7944	0	13	0	4	0	--	-	-	-	-
Unigene0000259	0	0	0	0.5437	0	0	0	2	--	-	-	-	-
Unigene0000260	0	0	0	0	0	0	0	0	--	-	-	-	-
Unigene0000261	0	0.3203	0	0	0	2	0	0	endonuclease/exonuclease/phosphatase family protein [Medicago truncatula]	-	-	-	-
Unigene0000262	1.0057	1.3774	1.4158	0.639	12	15	17	7	endonuclease/exonuclease/phosphatase family protein [Medicago truncatula]	-	-	-	-
Unigene0000263	3.3853	4.8503	1.5526	0.9927	26	34	12	7	--	-	-	-	-
Unigene0000264	0.696	0.3813	0.5187	1.5161	8	4	6	16	PREDICTED: cleavage stimulating factor 64 [Cucumis sativus]	ko03015//mRNA surveillance pathway//Translation//Genetic Information Processing	-	GO:0097159//organic cyclic compound binding;GO:0005488//binding;GO:0036094//small molecule binding	-
Unigene0000265	17.7002	15.0039	15.2992	17.6242	676	523	588	618	PREDICTED: cleavage stimulation factor subunit 2 [Cucumis melo]	ko03015//mRNA surveillance pathway//Translation//Genetic Information Processing	-	GO:1901363//heterocyclic compound binding;GO:0097159//organic cyclic compound binding;GO:0036094//small molecule binding;GO:0005488//binding	-
Unigene0000266	0	0	0	0	0	0	0	0	PREDICTED: cleavage stimulation factor subunit 2 [Cucumis melo]	ko03015//mRNA surveillance pathway//Translation//Genetic Information Processing	-	GO:0003676//nucleic acid binding;GO:0044822//poly(A) RNA binding;GO:1901363//heterocyclic compound binding;GO:0005488//binding;GO:0036094//small molecule binding;GO:0097159//organic cyclic compound binding;GO:0003723//RNA binding	GO:0040007//growth;GO:0043170//macromolecule metabolic process;GO:0071704//organic substance metabolic process;GO:0090304//nucleic acid metabolic process;GO:1901360//organic cyclic compound metabolic process;GO:0006807//nitrogen compound metabolic process;GO:0031326//regulation of cellular biosynthetic process;GO:0008152//metabolic process;GO:0050789//regulation of biological process;GO:0006355//…
Unigene0000267	0.8553	1.0932	2.1247	0.3105	6	7	15	2	--	-	-	-	-
Unigene0000268	1.9566	1.9906	0.6944	0	14	13	5	0	--	-	-	-	-
Unigene0000269	0	0	0	0	0	0	0	0	PREDICTED: protein YLS9-like [Malus domestica]	-	-	-	-
Unigene0000270	4.1189	3.4836	4.3084	4.1713	57	44	60	53	PREDICTED: protein NDR1 [Cucumis melo]	-	-	-	-
Unigene0000271	1.0117	2.7711	1.7593	0	4	10	7	0	--	-	-	-	-
Unigene0000272	0	0	0	0	0	0	0	0	PREDICTED: zinc-finger homeodomain protein 10-like [Cucumis sativus]	-	-	GO:1901363//heterocyclic compound binding;GO:0005488//binding;GO:0003676//nucleic acid binding;GO:0097159//organic cyclic compound binding	-
Unigene0000273	0	0	0	0	0	0	0	0	PREDICTED: zinc-finger homeodomain protein 10-like [Cucumis sativus]	-	-	GO:0005488//binding;GO:0003676//nucleic acid binding;GO:1901363//heterocyclic compound binding;GO:0097159//organic cyclic compound binding	-
Unigene0000274	2.2655	1.6229	2.2512	0.8541	26	17	26	9	zinc finger-homeodomain protein 1, partial [Cucumis sativus]	-	-	GO:0005488//binding;GO:1901363//heterocyclic compound binding;GO:0097159//organic cyclic compound binding;GO:0003676//nucleic acid binding	-
Unigene0000275	0.8959	0	1.9586	0	5	0	11	0	--	-	-	-	-
Unigene0000276	15.9655	11.6786	5.828	4.2078	343	229	126	83	PREDICTED: histone H3.v1 [Pyrus x bretschneideri]	-	-	-	-
Unigene0000277	1.8818	1.804	5.0255	0	16	14	43	0	--	-	-	-	-
Unigene0000278	0	0	0	0	0	0	0	0	--	-	-	-	-
Unigene0000279	0	0	0	0	0	0	0	0	--	-	-	-	-
Unigene0000280	91.8037	140.331	96.6795	104.586	3262	4551	3457	3412	Protein FAM69A [Gossypium arboreum]	-	-	-	-
Unigene0000281	1.7711	0	1.28	0	11	0	8	0	--	-	-	-	-
Unigene0000282	8.6299	2.7015	1.7819	0.3662	77	22	16	3	--	-	-	-	-
Unigene0000283	0.5228	0	0.6927	1.5184	3	0	4	8	--	-	-	-	-
Unigene0000284	0.6949	0.7614	0.3453	1.8922	4	4	2	10	oxidoreductase, short chain dehydrogenase/reductase family protein, expressed [Oryza sativa Japonica Group]	-	GO:0043231//intracellular membrane-bounded organelle;GO:0044464//cell part;GO:0005622//intracellular;GO:0044424//intracellular part;GO:0043229//intracellular organelle;GO:0005623//cell;GO:0043226//organelle;GO:0043227//membrane-bounded organelle	GO:0003824//catalytic activity	GO:0044710//single-organism metabolic process;GO:0008152//metabolic process;GO:0044699//single-organism process;GO:0051234//establishment of localization;GO:0051179//localization
Unigene0000285	0	0.5263	0.4773	1.0463	0	2	2	4	PREDICTED: subtilisin-like protease isoform X2 [Cucumis melo]	-	-	GO:0005515//protein binding;GO:0016787//hydrolase activity;GO:0005488//binding;GO:0070011//peptidase activity, acting on L-amino acid peptides;GO:0008233//peptidase activity;GO:0003824//catalytic activity;GO:0004175//endopeptidase activity	GO:0071704//organic substance metabolic process;GO:0019538//protein metabolic process;GO:0043170//macromolecule metabolic process;GO:0044238//primary metabolic process;GO:0050789//regulation of biological process;GO:0008152//metabolic process;GO:0009892//negative regulation of metabolic process;GO:0065007//biological regulation;GO:0019222//regulation of metabolic process;GO:0048519//negative regu…
Unigene0000286	0.8244	0.6022	0.8192	0	3	2	3	0	F27F5.21 [Arabidopsis thaliana]	-	-	-	-
Unigene0000287	3.2287	0.9171	0.4753	2.4746	27	7	4	19	PREDICTED: dirigent protein 6 [Cucumis sativus]	-	-	GO:0043169//cation binding;GO:0043167//ion binding;GO:0005488//binding;GO:0046872//metal ion binding	-
Unigene0000288	40.4831	44.4781	48.0397	55.956	721	723	861	915	PREDICTED: transmembrane protein 18 [Cucumis melo]	-	-	-	-
Unigene0000289	8.814	10.1614	11.8959	14.8294	134	141	182	207	PREDICTED: PRA1 family protein F2-like [Cucumis melo]	-	GO:0043227//membrane-bounded organelle;GO:0044422//organelle part;GO:0005622//intracellular;GO:0043226//organelle;GO:0043231//intracellular membrane-bounded organelle;GO:0044464//cell part;GO:0016020//membrane;GO:0005623//cell;GO:0031090//organelle membrane;GO:0044424//intracellular part;GO:0043229//intracellular organelle	GO:0016491//oxidoreductase activity;GO:0046872//metal ion binding;GO:0005488//binding;GO:0043169//cation binding;GO:0043167//ion binding;GO:0003824//catalytic activity	GO:0051179//localization;GO:0051234//establishment of localization;GO:0006810//transport
Unigene0000290	2.0323	1.9484	1.0098	2.2135	8	7	4	8	--	-	-	-	-
Unigene0000291	0.3229	1.2384	0.9627	0	2	7	6	0	--	-	-	-	-
Unigene0000292	0.7028	0.77	1.6295	0.5103	3	3	7	2	--	-	-	-	-
Unigene0000293	1.0087	2.5787	0.9069	0.1046	21	49	19	2	PREDICTED: heat shock 70 kDa protein [Cucumis melo]	ko04141//Protein processing in endoplasmic reticulum//Folding, sorting and degradation//Genetic Information Processing;ko04144//Endocytosis//Transport and catabolism//Cellular Processes;ko03040//Spliceosome//Transcription//Genetic Information Processing	-	GO:1901363//heterocyclic compound binding;GO:0097159//organic cyclic compound binding;GO:0036094//small molecule binding;GO:0001882//nucleoside binding;GO:0032550//purine ribonucleoside binding;GO:0097367//carbohydrate derivative binding;GO:0001883//purine nucleoside binding;GO:0032549//ribonucleoside binding;GO:0005488//binding	-
Unigene0000294	2.2864	1.1387	1.8589	0.9055	22	10	18	8	Os11g0573700 [Oryza sativa Japonica Group]	-	-	-	-
Unigene0000295	0	0.3695	1.3404	2.0201	0	2	8	11	--	-	-	-	-
Unigene0000296	1.2783	0.6003	1.0888	0.3978	7	3	6	2	--	-	-	-	-
Unigene0000297	1.9881	0	0	0.812	8	0	0	3	--	-	-	-	-
Unigene0000298	0	0	0	0	0	0	0	0	--	-	-	-	-
Unigene0000299	0.4157	0.4555	0	0	2	2	0	0	--	-	-	-	-
Unigene0000300	46.4481	42.3357	73.8096	76.3195	464	386	742	700	BnaC08g23350D [Brassica napus]	-	-	-	-
Unigene0000301	0.5317	0.5826	1.0567	0	2	2	4	0	--	-	-	-	-
Unigene0000302	1.0887	0.3976	0.7213	2.174	6	2	4	11	--	-	-	-	-
Unigene0000303	1.4039	1.3184	0.9965	1.5291	7	6	5	7	hypothetical protein Csa_3G854260 [Cucumis sativus]	-	-	-	-
Unigene0000304	1.8257	1.0771	1.6747	0.153	13	7	12	1	PREDICTED: pentatricopeptide repeat-containing protein At2g35130 [Cucumis sativus]	-	-	-	-
Unigene0000305	2.7613	0.3025	1.0976	1.0526	20	2	8	7	PREDICTED: pentatricopeptide repeat-containing protein At2g35130 isoform X2 [Cucumis melo]	-	-	-	-
Unigene0000306	0.5954	0	2.9583	0.1621	4	0	20	1	--	-	-	-	-
Unigene0000307	1.1745	3.2171	4.4739	2.3452	12	30	46	22	PREDICTED: copper transport protein ATX1-like [Cucumis sativus]	-	-	GO:0043167//ion binding;GO:0043169//cation binding;GO:0005488//binding	GO:1902578//single-organism localization;GO:0044765//single-organism transport;GO:0006812//cation transport;GO:0051179//localization;GO:0006811//ion transport;GO:0044699//single-organism process;GO:0006810//transport;GO:0051234//establishment of localization
Unigene0000308	2.0506	0	0	0	8	0	0	0	--	-	-	-	-
Unigene0000309	0.3028	0.4147	0.7523	0.0825	8	10	20	2	PREDICTED: probable pectinesterase 67 [Cucumis sativus]	-	-	GO:0003824//catalytic activity;GO:0016788//hydrolase activity, acting on ester bonds;GO:0016787//hydrolase activity	GO:0009987//cellular process
Unigene0000310	0	0	0	0	0	0	0	0	PREDICTED: probable pectinesterase 67 [Cucumis sativus]	-	-	GO:0016787//hydrolase activity;GO:0003824//catalytic activity;GO:0016788//hydrolase activity, acting on ester bonds	GO:0009987//cellular process
Unigene0000311	2.7157	2.9754	0	0.5634	21	21	0	4	--	-	-	-	-
Unigene0000312	0	0.206	0	0.2048	0	1	0	1	PREDICTED: uncharacterized protein LOC103448574 [Malus domestica]	-	-	-	-
Unigene0000313	0.2121	0.3486	0.7377	0.8085	2	3	7	7	F-box domain containing protein [Oryza sativa Japonica Group]	-	-	-	-
Unigene0000314	0.4466	1.4678	0	0.2432	2	6	0	1	--	-	-	-	-
Unigene0000315	0.3736	0.614	2.7843	0	2	3	15	0	--	-	-	-	-
Unigene0000316	1.3773	0.503	0.2281	0.7501	6	2	1	3	--	-	-	-	-
Unigene0000317	0.7541	0.3305	2.9973	0.3285	5	2	20	2	--	-	-	-	-
Unigene0000318	0.6764	0.8647	1.5684	3.1926	6	7	14	26	PREDICTED: transcription factor FAMA [Cucumis melo]	-	-	GO:0005515//protein binding;GO:0003824//catalytic activity;GO:0043177//organic acid binding;GO:0031406//carboxylic acid binding;GO:0043168//anion binding;GO:0016491//oxidoreductase activity;GO:0036094//small molecule binding;GO:0005488//binding;GO:0043167//ion binding	GO:0044700//single organism signaling;GO:0070887//cellular response to chemical stimulus;GO:0050794//regulation of cellular process;GO:0048856//anatomical structure development;GO:0044707//single-multicellular organism process;GO:0030154//cell differentiation;GO:0007275//multicellular organismal development;GO:0044710//single-organism metabolic process;GO:0065007//biological regulation;GO:0032502…
Unigene0000319	1.2337	0.2253	0.6129	0	6	1	3	0	--	-	-	-	-
Unigene0000320	2.1855	1.1052	0.6682	0	13	6	4	0	--	-	-	-	-
Unigene0000321	28.6964	19.752	12.7683	7.8455	737	463	330	185	PREDICTED: spartin-like [Fragaria vesca subsp. vesca]	-	-	-	-
Unigene0000322	2.5801	0	0.1972	0	13	0	1	0	--	-	-	-	-
Unigene0000323	3.1486	1.3268	0.2407	0	13	5	1	0	--	-	-	-	-
Unigene0000324	0	0	0.6473	0	0	0	4	0	PREDICTED: zinc-finger homeodomain protein 6-like [Cucumis sativus]	-	-	GO:0097159//organic cyclic compound binding;GO:0005488//binding;GO:0003676//nucleic acid binding;GO:1901363//heterocyclic compound binding	-
Unigene0000325	0.4885	0	0	0	3	0	0	0	PREDICTED: zinc-finger homeodomain protein 6-like [Cucumis sativus]	-	-	GO:0097159//organic cyclic compound binding;GO:0005488//binding;GO:1901363//heterocyclic compound binding;GO:0003676//nucleic acid binding	-
Unigene0000326	6.7987	4.2762	2.8775	0.2743	54	31	23	2	PREDICTED: zinc-finger homeodomain protein 6-like [Cucumis sativus]	-	-	-	-
Unigene0000327	0.5367	2.0581	0.8	0	2	7	3	0	--	-	-	-	-
Unigene0000328	0	0	0	0	0	0	0	0	PREDICTED: probable calcium-binding protein CML25 [Cucumis melo]	ko04626//Plant-pathogen interaction//Environmental adaptation//Organismal Systems	GO:0044464//cell part;GO:0005623//cell;GO:0005622//intracellular;GO:0044424//intracellular part	GO:0016491//oxidoreductase activity;GO:0043167//ion binding;GO:0005488//binding;GO:0043169//cation binding;GO:0003824//catalytic activity;GO:0046872//metal ion binding	GO:0048856//anatomical structure development;GO:0044699//single-organism process;GO:0032502//developmental process
Unigene0000329	0	0	0	0	0	0	0	0	PREDICTED: probable calcium-binding protein CML25 [Cucumis melo]	ko04626//Plant-pathogen interaction//Environmental adaptation//Organismal Systems	GO:0044424//intracellular part;GO:0005623//cell;GO:0005622//intracellular;GO:0044464//cell part	GO:0043169//cation binding;GO:0046872//metal ion binding;GO:0003824//catalytic activity;GO:0016491//oxidoreductase activity;GO:0005488//binding;GO:0043167//ion binding	GO:0032502//developmental process;GO:0044699//single-organism process;GO:0048856//anatomical structure development
Unigene0000330	1.3293	0.6242	0.7548	3.1024	7	3	4	15	--	-	-	-	-
Unigene0000331	0	0.614	1.949	0.3052	0	2	7	1	PREDICTED: probable LRR receptor-like serine/threonine-protein kinase At1g51860 [Cucumis melo]	-	-	GO:0016740//transferase activity;GO:0001883//purine nucleoside binding;GO:0032549//ribonucleoside binding;GO:0097367//carbohydrate derivative binding;GO:1901363//heterocyclic compound binding;GO:0097159//organic cyclic compound binding;GO:0016301//kinase activity;GO:0016772//transferase activity, transferring phosphorus-containing groups;GO:0005488//binding;GO:0032550//purine ribonucleoside bindi…	GO:0044260//cellular macromolecule metabolic process;GO:0036211//protein modification process;GO:0008152//metabolic process;GO:0044267//cellular protein metabolic process;GO:0044237//cellular metabolic process;GO:0006464//cellular protein modification process;GO:0009987//cellular process;GO:0043170//macromolecule metabolic process;GO:0071704//organic substance metabolic process;GO:0044238//primar…
Unigene0000332	0	0	0	0	0	0	0	0	PREDICTED: F-box protein SKIP28 isoform X1 [Cucumis melo]	-	-	-	-
Unigene0000333	0.1992	0.6546	1.2864	1.6269	4	12	26	30	PREDICTED: F-box protein SKIP28 [Cucumis sativus]	-	-	-	GO:0032502//developmental process;GO:0044699//single-organism process;GO:0044707//single-multicellular organism process;GO:0032501//multicellular organismal process
Unigene0000334	27.8509	17.7411	15.4469	2.9981	172	100	96	17	--	-	-	-	-
Unigene0000335	1.444	1.0548	1.0762	0	12	8	9	0	--	-	-	-	-
Unigene0000336	3.567	2.0017	1.5562	0.4738	41	21	18	5	--	-	-	-	-
Unigene0000337	1.3792	2.1827	1.9796	0	9	13	13	0	PREDICTED: transcription factor JUNGBRUNNEN 1 [Cucumis sativus]	-	-	GO:0005488//binding;GO:0003676//nucleic acid binding;GO:0097159//organic cyclic compound binding;GO:1901363//heterocyclic compound binding	GO:1901576//organic substance biosynthetic process;GO:0044249//cellular biosynthetic process;GO:0050789//regulation of biological process;GO:0065007//biological regulation;GO:0043170//macromolecule metabolic process;GO:0009059//macromolecule biosynthetic process;GO:0009058//biosynthetic process;GO:0008152//metabolic process;GO:0019222//regulation of metabolic process;GO:0044260//cellular macromol…
Unigene0000338	1.9916	1.9639	1.7812	0	10	9	9	0	PREDICTED: transcription factor JUNGBRUNNEN 1 [Cucumis melo]	-	GO:0043226//organelle;GO:0043227//membrane-bounded organelle;GO:0005622//intracellular;GO:0044464//cell part;GO:0043229//intracellular organelle;GO:0005623//cell;GO:0043231//intracellular membrane-bounded organelle;GO:0044424//intracellular part	GO:0097159//organic cyclic compound binding;GO:1901363//heterocyclic compound binding;GO:0005488//binding;GO:0003676//nucleic acid binding	GO:0009058//biosynthetic process;GO:0050789//regulation of biological process;GO:0008152//metabolic process;GO:0060255//regulation of macromolecule metabolic process;GO:0043170//macromolecule metabolic process;GO:0034645//cellular macromolecule biosynthetic process;GO:0019222//regulation of metabolic process;GO:0009059//macromolecule biosynthetic process;GO:0071704//organic substance metabolic pr…
Unigene0000339	1.1571	4.0568	4.8291	1.0082	10	32	42	8	PREDICTED: protein TPX2-like [Cucumis sativus]	-	GO:0043228//non-membrane-bounded organelle;GO:0044424//intracellular part;GO:0043229//intracellular organelle;GO:0043232//intracellular non-membrane-bounded organelle;GO:0044464//cell part;GO:0005623//cell;GO:0015630//microtubule cytoskeleton;GO:0043226//organelle;GO:0005622//intracellular;GO:0005856//cytoskeleton	-	GO:0000280//nuclear division;GO:0016043//cellular component organization;GO:0071840//cellular component organization or biogenesis;GO:0006996//organelle organization;GO:0009987//cellular process;GO:0048285//organelle fission
Unigene0000340	0	3.5552	0	0	0	13	0	0	--	-	-	-	-
Unigene0000341	2.2342	0.816	1.4801	0	12	4	8	0	--	-	-	-	-
Unigene0000342	3.0705	0.7764	0.2347	0.7718	13	3	1	3	hypothetical protein PRUPE_ppa017805mg, partial [Prunus persica]	-	-	-	-
Unigene0000343	1.4373	2.5438	0.9888	0	13	21	9	0	--	-	-	-	-
Unigene0000344	1.3609	1.4911	0.8114	0	5	5	3	0	--	-	-	-	-
Unigene0000345	2.2174	1.2822	2.0198	1.4759	36	19	33	22	BnaC06g30520D [Brassica napus]	-	-	-	-
Unigene0000346	1.6713	2.1058	3.197	2.6395	40	46	77	58	pentatricopeptide repeat-containing family protein [Populus trichocarpa]	-	-	-	-
Unigene0000347	0.2485	0.8169	1.4817	0.2707	1	3	6	1	--	-	-	-	-
Unigene0000348	0.8051	0.294	1.3333	0	3	1	5	0	--	-	-	-	-
Unigene0000349	1.0935	0.8713	2.272	1.4075	11	8	23	13	--	-	-	-	-
Unigene0000350	0.2071	0.9076	3.9101	0.4511	1	4	19	2	--	-	-	-	-
Unigene0000351	2.5518	0.7455	0.5071	2.594	15	4	3	14	--	-	-	-	-
Unigene0000352	0.5754	1.6812	1.906	0	3	8	10	0	--	-	-	-	-
Unigene0000353	1.0734	0	0.8	0.2923	4	0	3	1	--	-	-	-	-
Unigene0000354	0	1.7477	0.7926	1.4478	0	6	3	5	PREDICTED: palmitoyl-monogalactosyldiacylglycerol delta-7 desaturase, chloroplastic-like [Cucumis melo]	ko01212//Fatty acid metabolism//Global and Overview//Metabolism;ko01040//Biosynthesis of unsaturated fatty acids//Lipid metabolism//Metabolism	GO:0044425//membrane part;GO:0031224//intrinsic component of membrane;GO:0016020//membrane	GO:0016491//oxidoreductase activity;GO:0003824//catalytic activity;GO:0016705//oxidoreductase activity, acting on paired donors, with incorporation or reduction of molecular oxygen;GO:0016215//acyl-CoA desaturase activity;GO:0016717//oxidoreductase activity, acting on paired donors, with oxidation of a pair of donors resulting in the reduction of molecular oxygen to two molecules of water	GO:0009987//cellular process;GO:0008152//metabolic process;GO:0044238//primary metabolic process;GO:0006629//lipid metabolic process;GO:0006631//fatty acid metabolic process;GO:0044255//cellular lipid metabolic process;GO:0044237//cellular metabolic process;GO:0032787//monocarboxylic acid metabolic process;GO:0019752//carboxylic acid metabolic process;GO:0071704//organic substance metabolic proce…
Unigene0000355	10.5043	9.6917	12.0253	16.0571	342	288	394	480	amidase family protein [Populus trichocarpa]	ko00360//Phenylalanine metabolism//Amino acid metabolism//Metabolism;ko00330//Arginine and proline metabolism//Amino acid metabolism//Metabolism;ko00380//Tryptophan metabolism//Amino acid metabolism//Metabolism	-	GO:0016879//ligase activity, forming carbon-nitrogen bonds;GO:0016787//hydrolase activity;GO:0016874//ligase activity;GO:0003824//catalytic activity	-
Unigene0000356	0	0	0	0	0	0	0	0	amidase [Cucumis melo subsp. melo]	ko00360//Phenylalanine metabolism//Amino acid metabolism//Metabolism;ko00330//Arginine and proline metabolism//Amino acid metabolism//Metabolism;ko00380//Tryptophan metabolism//Amino acid metabolism//Metabolism	-	GO:0016874//ligase activity;GO:0003824//catalytic activity;GO:0016879//ligase activity, forming carbon-nitrogen bonds;GO:0016787//hydrolase activity	-
Unigene0000357	0	0.2977	0.09	0.1973	0	3	1	2	amidase [Cucumis melo subsp. melo]	ko00360//Phenylalanine metabolism//Amino acid metabolism//Metabolism;ko00330//Arginine and proline metabolism//Amino acid metabolism//Metabolism;ko00380//Tryptophan metabolism//Amino acid metabolism//Metabolism	-	GO:0016874//ligase activity;GO:0003824//catalytic activity;GO:0016879//ligase activity, forming carbon-nitrogen bonds	-
Unigene0000358	1.0651	0.389	1.0584	0.5156	9	3	9	4	PREDICTED: NADH dehydrogenase [ubiquinone] flavoprotein 1, mitochondrial-like [Nelumbo nucifera]	-	GO:0043231//intracellular membrane-bounded organelle;GO:0044464//cell part;GO:0043226//organelle;GO:0005911//cell-cell junction;GO:0043227//membrane-bounded organelle;GO:0005622//intracellular;GO:0030054//cell junction;GO:0044424//intracellular part;GO:0005623//cell;GO:0043229//intracellular organelle	-	-
Unigene0000359	2.2198	0.2027	1.2867	0	12	1	7	0	--	-	-	-	-
Unigene0000360	0.2314	1.0142	0.4599	1.0082	1	4	2	4	--	-	-	-	-
Unigene0000361	4.0828	0.1945	0	0	23	1	0	0	PREDICTED: uncharacterized protein LOC103336956 [Prunus mume]	-	-	-	-
Unigene0000362	3.241	1.2913	0.8783	0.6418	22	8	6	4	--	-	-	-	-
Unigene0000363	0	0	0	0	0	0	0	0	PREDICTED: peroxin Pex14 isoform X1 [Zea mays]	-	-	GO:0097159//organic cyclic compound binding;GO:0005488//binding;GO:1901363//heterocyclic compound binding;GO:0036094//small molecule binding	-
Unigene0000364	0	0	0	0	0	0	0	0	PREDICTED: peroxin Pex14 isoform X2 [Zea mays]	-	-	GO:0005488//binding;GO:1901363//heterocyclic compound binding;GO:0097159//organic cyclic compound binding	-
Unigene0000365	2.5571	1.6481	0	0	17	10	0	0	--	-	-	-	-
Unigene0000366	2.1073	1.1544	0	0.5738	8	4	0	2	--	-	-	-	-
Unigene0000367	0.5149	0.5642	0	1.1217	2	2	0	4	Os07g0507700 [Oryza sativa Japonica Group]	-	GO:0043227//membrane-bounded organelle;GO:0044424//intracellular part;GO:0005623//cell;GO:0043231//intracellular membrane-bounded organelle;GO:0005622//intracellular;GO:0043226//organelle;GO:0043229//intracellular organelle;GO:0044464//cell part	-	GO:0009987//cellular process;GO:0044260//cellular macromolecule metabolic process;GO:0010468//regulation of gene expression;GO:0009059//macromolecule biosynthetic process;GO:0044249//cellular biosynthetic process;GO:1901576//organic substance biosynthetic process;GO:0050789//regulation of biological process;GO:0065007//biological regulation;GO:0044237//cellular metabolic process;GO:0019222//regul…
Unigene0000368	1.6005	0.7515	1.3632	0.498	7	3	6	2	--	-	-	-	-
Unigene0000369	2.7115	0.4753	1.2933	0.4725	25	4	12	4	--	-	-	-	-
Unigene0000370	2.2972	0.5922	0.5371	1.4717	17	4	4	10	PREDICTED: UPF0481 protein At3g47200 [Cucumis sativus]	-	-	-	-
Unigene0000371	0.2709	0.8904	0.5384	0	1	3	2	0	--	-	-	-	-
Unigene0000372	0	1.9053	1.3524	0.7411	0	23	18	9	PREDICTED: galactose oxidase-like [Cucumis melo]	-	-	GO:0003824//catalytic activity;GO:0016740//transferase activity;GO:0016765//transferase activity, transferring alkyl or aryl (other than methyl) groups	-
Unigene0000373	1.4113	0.5154	0.4675	0.5124	6	2	2	2	hypothetical protein Csa_6G124190 [Cucumis sativus]	-	-	-	-
Unigene0000374	0	0	0	0	0	0	0	0	PREDICTED: probable 3-hydroxyisobutyrate dehydrogenase-like 3, mitochondrial [Cucumis sativus]	-	-	GO:0097159//organic cyclic compound binding;GO:0016616//oxidoreductase activity, acting on the CH-OH group of donors, NAD or NADP as acceptor;GO:0003824//catalytic activity;GO:0036094//small molecule binding;GO:1901265//nucleoside phosphate binding;GO:0000166//nucleotide binding;GO:0005488//binding;GO:0016614//oxidoreductase activity, acting on CH-OH group of donors;GO:1901363//heterocyclic compo…	GO:0044237//cellular metabolic process;GO:0006139//nucleobase-containing compound metabolic process;GO:0072524//pyridine-containing compound metabolic process;GO:0009987//cellular process;GO:1901564//organonitrogen compound metabolic process;GO:0046496//nicotinamide nucleotide metabolic process;GO:0071704//organic substance metabolic process;GO:1901360//organic cyclic compound metabolic process;G…
Unigene0000375	5.3984	7.3934	9.5455	10.3758	68	85	121	120	PREDICTED: probable 3-hydroxyisobutyrate dehydrogenase-like 3, mitochondrial [Cucumis melo]	-	-	GO:0000166//nucleotide binding;GO:0005488//binding;GO:1901265//nucleoside phosphate binding;GO:0097159//organic cyclic compound binding;GO:0016616//oxidoreductase activity, acting on the CH-OH group of donors, NAD or NADP as acceptor;GO:1901363//heterocyclic compound binding;GO:0036094//small molecule binding;GO:0016614//oxidoreductase activity, acting on CH-OH group of donors;GO:0048037//cofacto…	GO:0071704//organic substance metabolic process;GO:0044237//cellular metabolic process;GO:0019637//organophosphate metabolic process;GO:0009117//nucleotide metabolic process;GO:0006793//phosphorus metabolic process;GO:0006139//nucleobase-containing compound metabolic process;GO:0072524//pyridine-containing compound metabolic process;GO:0044699//single-organism process;GO:1901564//organonitrogen c…
Unigene0000376	0.9754	0.855	0.7754	0	5	4	4	0	--	-	-	-	-
Unigene0000377	16.1896	4.887	6.7306	4.1383	98	27	41	23	--	-	-	-	-
Unigene0000378	1.4656	1.147	1.0403	0	7	5	5	0	--	-	-	-	-
Unigene0000379	2.2135	0.2853	0.5175	1.1345	17	2	4	8	OSJNBb0016D16.10 [Oryza sativa Japonica Group]	-	-	GO:1901363//heterocyclic compound binding;GO:0003824//catalytic activity;GO:0016772//transferase activity, transferring phosphorus-containing groups;GO:0016740//transferase activity;GO:0005488//binding;GO:0097159//organic cyclic compound binding	-
Unigene0000380	1.6409	0.5993	0	0	6	2	0	0	--	-	-	-	-
Unigene0000381	74.9708	81.516	89.9898	118.261	2496	2477	3015	3615	PREDICTED: AP-1 complex subunit mu-2 [Cucumis melo]	-	GO:0044444//cytoplasmic part;GO:0005623//cell;GO:0032991//macromolecular complex;GO:0005622//intracellular;GO:0016020//membrane;GO:0044424//intracellular part;GO:0044464//cell part;GO:0043234//protein complex;GO:0044425//membrane part;GO:0005737//cytoplasm;GO:0030119//AP-type membrane coat adaptor complex;GO:0048475//coated membrane;GO:0030117//membrane coat	-	GO:0071702//organic substance transport;GO:0045184//establishment of protein localization;GO:0051234//establishment of localization;GO:0006810//transport;GO:0033036//macromolecule localization;GO:0051179//localization;GO:0015031//protein transport;GO:0008104//protein localization
Unigene0000382	1.6436	1.4006	1.4517	0.7956	9	7	8	4	--	-	-	-	-
Unigene0000383	0.6369	0.5233	1.5822	0.3468	4	3	10	2	--	-	-	-	-
Unigene0000384	3.099	0.9432	0.8554	0.1875	18	5	5	1	--	-	-	-	-
Unigene0000385	0.7976	2.039	0	0.2896	3	7	0	1	--	-	-	-	-
Unigene0000386	1.8741	2.8518	1.6554	0.567	18	25	16	5	--	-	-	-	-
Unigene0000387	8.5613	7.5409	11.5934	7.3133	102	82	139	80	CTP-dependent diacylglycerol kinase 1 [Gossypium arboreum]	-	-	-	-
Unigene0000388	1.4341	0.4489	1.2215	0	7	2	6	0	--	-	-	-	-
Unigene0000389	0.3517	0.3854	1.2234	0	2	2	7	0	--	-	-	-	-
Unigene0000390	0	0	2.0654	0	0	0	8	0	--	-	-	-	-
Unigene0000391	2.3816	1.248	0.7203	0	23	11	7	0	--	-	-	-	-
Unigene0000392	0	0	0	0	0	0	0	0	--	-	-	-	-
Unigene0000393	1.0028	0	1.7438	0	4	0	7	0	--	-	-	-	-
Unigene0000394	0.4591	4.5272	0	0	2	18	0	0	--	-	-	-	-
Unigene0000395	0.2242	0.7368	0.6682	0.7324	1	3	3	3	--	-	-	-	-
Unigene0000396	2.8111	1.7111	1.0346	0.4536	27	15	10	4	--	-	-	-	-
Unigene0000397	3.2662	2.013	0.6086	0.8894	16	9	3	4	--	-	-	-	-
Unigene0000398	1.6568	2.0422	1.2348	0	8	9	6	0	--	-	-	-	-
Unigene0000399	0	0.5668	0.257	2.5353	0	2	1	9	--	-	-	-	-
Unigene0000400	3.9786	0.2906	1.7132	0.1444	30	2	13	1	--	-	-	-	-
Unigene0000401	0.2659	1.4564	1.0567	0	1	5	4	0	--	-	-	-	-
Unigene0000402	0.4591	1.7606	0.2281	0	2	7	1	0	--	-	-	-	-
Unigene0000403	0	0	0	0	0	0	0	0	PsbC, partial (chloroplast) [Persea americana]	ko00195//Photosynthesis//Energy metabolism//Metabolism	GO:0032991//macromolecular complex;GO:0044435//plastid part;GO:0044436//thylakoid part;GO:0009507//chloroplast;GO:0005623//cell;GO:0043227//membrane-bounded organelle;GO:0009536//plastid;GO:0044444//cytoplasmic part;GO:0044424//intracellular part;GO:0044422//organelle part;GO:0043226//organelle;GO:0044446//intracellular organelle part;GO:0044464//cell part;GO:0044425//membrane part;GO:0009521//ph…	GO:1901363//heterocyclic compound binding;GO:0009055//electron carrier activity;GO:0043167//ion binding;GO:0046906//tetrapyrrole binding;GO:0005488//binding;GO:0043169//cation binding;GO:0097159//organic cyclic compound binding	GO:0044710//single-organism metabolic process;GO:0022900//electron transport chain;GO:0043412//macromolecule modification;GO:0044238//primary metabolic process;GO:0044699//single-organism process;GO:0044267//cellular protein metabolic process;GO:0009987//cellular process;GO:0015979//photosynthesis;GO:0071704//organic substance metabolic process;GO:0009767//photosynthetic electron transport chain;…
Unigene0000404	1.7665	2.9032	0.3762	2.6111	14	21	3	19	photosystem II CP43 chlorophyll apoprotein, partial [Flagellaria indica]	ko00195//Photosynthesis//Energy metabolism//Metabolism	GO:0044436//thylakoid part;GO:0044424//intracellular part;GO:0043234//protein complex;GO:0043227//membrane-bounded organelle;GO:0005622//intracellular;GO:0009536//plastid;GO:0005623//cell;GO:0016020//membrane;GO:0005737//cytoplasm;GO:0009507//chloroplast;GO:0044435//plastid part;GO:0034357//photosynthetic membrane;GO:0044444//cytoplasmic part;GO:0044464//cell part;GO:0043229//intracellular organe…	GO:0005488//binding;GO:0097159//organic cyclic compound binding;GO:1901363//heterocyclic compound binding;GO:0043169//cation binding;GO:0043167//ion binding;GO:0046906//tetrapyrrole binding;GO:0009055//electron carrier activity	GO:0055114//oxidation-reduction process;GO:0043170//macromolecule metabolic process;GO:0044237//cellular metabolic process;GO:0006464//cellular protein modification process;GO:0008152//metabolic process;GO:0044267//cellular protein metabolic process;GO:0044710//single-organism metabolic process;GO:0044260//cellular macromolecule metabolic process;GO:0044238//primary metabolic process;GO:0044763//…
Unigene0000405	0.8195	0.8979	2.443	2.2314	4	4	12	10	--	-	-	-	-
Unigene0000406	1.0684	2.3412	0.7078	0	6	12	4	0	gag/pol protein [Bryonia dioica]	-	-	-	-
Unigene0000407	19.6994	10.8159	9.3717	11.5198	447	224	214	240	T-box protein 41 [Theobroma cacao]	-	-	-	-
Unigene0000408	1.7704	0.2771	0.2513	0.5509	14	2	2	4	cyst nematode resistance protein-like protein [Oryza sativa Japonica Group]	-	-	-	-
Unigene0000409	0	0	0	0	0	0	0	0	PREDICTED: NAD-dependent malic enzyme 62 kDa isoform, mitochondrial isoform X1 [Cucumis melo]	ko01200//Carbon metabolism//Global and Overview//Metabolism;ko00620//Pyruvate metabolism//Carbohydrate metabolism//Metabolism;ko00710//Carbon fixation in photosynthetic organisms//Energy metabolism//Metabolism	GO:0044424//intracellular part;GO:0043231//intracellular membrane-bounded organelle;GO:0043229//intracellular organelle;GO:0043226//organelle;GO:0005737//cytoplasm;GO:0044444//cytoplasmic part;GO:0005623//cell;GO:0044464//cell part;GO:0043227//membrane-bounded organelle;GO:0009536//plastid;GO:0005622//intracellular	GO:0005515//protein binding;GO:0016614//oxidoreductase activity, acting on CH-OH group of donors;GO:0036094//small molecule binding;GO:0032550//purine ribonucleoside binding;GO:0046914//transition metal ion binding;GO:0032549//ribonucleoside binding;GO:0003824//catalytic activity;GO:0005488//binding;GO:0001883//purine nucleoside binding;GO:0046983//protein dimerization activity;GO:0016491//oxidor…	GO:0051179//localization;GO:1902578//single-organism localization;GO:0071704//organic substance metabolic process;GO:0042044//fluid transport;GO:0044699//single-organism process;GO:0006996//organelle organization;GO:0044237//cellular metabolic process;GO:0006810//transport;GO:0044765//single-organism transport;GO:0071840//cellular component organization or biogenesis;GO:0043436//oxoacid metabolic…
Unigene0000410	0	0	0	0	0	0	0	0	PREDICTED: NAD-dependent malic enzyme 62 kDa isoform, mitochondrial isoform X1 [Cucumis melo]	ko01200//Carbon metabolism//Global and Overview//Metabolism;ko00620//Pyruvate metabolism//Carbohydrate metabolism//Metabolism;ko00710//Carbon fixation in photosynthetic organisms//Energy metabolism//Metabolism	GO:0043227//membrane-bounded organelle;GO:0005623//cell;GO:0009536//plastid;GO:0044444//cytoplasmic part;GO:0044424//intracellular part;GO:0005622//intracellular;GO:0044464//cell part;GO:0043229//intracellular organelle;GO:0043226//organelle;GO:0005737//cytoplasm;GO:0043231//intracellular membrane-bounded organelle	GO:0097367//carbohydrate derivative binding;GO:0032550//purine ribonucleoside binding;GO:0046914//transition metal ion binding;GO:1901363//heterocyclic compound binding;GO:0016614//oxidoreductase activity, acting on CH-OH group of donors;GO:0000166//nucleotide binding;GO:0001882//nucleoside binding;GO:0001883//purine nucleoside binding;GO:0097159//organic cyclic compound binding;GO:0016491//oxido…	GO:0044710//single-organism metabolic process;GO:0051234//establishment of localization;GO:0010038//response to metal ion;GO:0044281//small molecule metabolic process;GO:0050896//response to stimulus;GO:0006950//response to stress;GO:0019752//carboxylic acid metabolic process;GO:0044699//single-organism process;GO:0009628//response to abiotic stimulus;GO:0006970//response to osmotic stress;GO:000…
Unigene0000411	0.4724	2.7604	0.3129	0	3	16	2	0	PREDICTED: coumaroyl-CoA:anthocyanidin 3-O-glucoside-6''-O-coumaroyltransferase 2-like isoform X1 [Cucumis melo]	-	-	GO:0016740//transferase activity;GO:0003824//catalytic activity;GO:0016746//transferase activity, transferring acyl groups	-
Unigene0000412	1.7034	1.4516	0.3762	0.6184	9	7	2	3	--	-	-	-	-
Unigene0000413	131.973	76.2928	24.3427	34.6542	4687	2473	870	1130	PREDICTED: S-adenosylmethionine decarboxylase proenzyme-like [Cucumis sativus]	ko00270//Cysteine and methionine metabolism//Amino acid metabolism//Metabolism;ko00330//Arginine and proline metabolism//Amino acid metabolism//Metabolism	-	GO:0016830//carbon-carbon lyase activity;GO:0003824//catalytic activity;GO:0016829//lyase activity;GO:0016831//carboxy-lyase activity	GO:0044272//sulfur compound biosynthetic process;GO:0006596//polyamine biosynthetic process;GO:0044249//cellular biosynthetic process;GO:0009987//cellular process;GO:0071704//organic substance metabolic process;GO:1901576//organic substance biosynthetic process;GO:1901564//organonitrogen compound metabolic process;GO:0008152//metabolic process;GO:0042401//cellular biogenic amine biosynthetic proc…
Unigene0000414	0	0	0	0	0	0	0	0	PREDICTED: S-adenosylmethionine decarboxylase proenzyme-like [Cucumis sativus]	ko00270//Cysteine and methionine metabolism//Amino acid metabolism//Metabolism;ko00330//Arginine and proline metabolism//Amino acid metabolism//Metabolism	-	GO:0016829//lyase activity;GO:0016831//carboxy-lyase activity;GO:0003824//catalytic activity;GO:0016830//carbon-carbon lyase activity	GO:0006576//cellular biogenic amine metabolic process;GO:0006596//polyamine biosynthetic process;GO:1901566//organonitrogen compound biosynthetic process;GO:0009308//amine metabolic process;GO:0044272//sulfur compound biosynthetic process;GO:1901564//organonitrogen compound metabolic process;GO:0006807//nitrogen compound metabolic process;GO:0044106//cellular amine metabolic process;GO:0044271//c…
Unigene0000415	1.4986	0.4691	0.8509	0	7	2	4	0	--	-	-	-	-
Unigene0000416	1.1386	1.9961	2.2629	0	5	8	10	0	--	-	-	-	-
Unigene0000417	1.5261	2.1281	1.3786	1.2088	11	14	10	8	PREDICTED: peroxin Pex14 isoform X2 [Zea mays]	-	-	-	-
Unigene0000418	2.4532	0	0.7313	0	10	0	3	0	--	-	-	-	-
Unigene0000419	2.0807	0.8046	0.8514	0.1333	17	6	7	1	--	-	-	-	-
Unigene0000420	0.7205	0	0.4773	0.5232	3	0	2	2	PREDICTED: protein SRG1 [Cucumis sativus]	-	-	GO:0005488//binding;GO:0003824//catalytic activity;GO:0016491//oxidoreductase activity;GO:0043167//ion binding;GO:0051213//dioxygenase activity;GO:0016705//oxidoreductase activity, acting on paired donors, with incorporation or reduction of molecular oxygen;GO:0043169//cation binding;GO:0016706//oxidoreductase activity, acting on paired donors, with incorporation or reduction of molecular oxygen,…	GO:0008152//metabolic process;GO:1901576//organic substance biosynthetic process;GO:0009812//flavonoid metabolic process;GO:0009813//flavonoid biosynthetic process;GO:0046148//pigment biosynthetic process;GO:0051552//flavone metabolic process;GO:0044699//single-organism process;GO:0009058//biosynthetic process;GO:0051553//flavone biosynthetic process;GO:0044710//single-organism metabolic process;…
Unigene0000421	47.8096	53.2078	81.643	80.8306	1396	1418	2399	2167	PREDICTED: cylicin-2 [Cucumis melo]	-	GO:0005623//cell;GO:0044444//cytoplasmic part;GO:0005737//cytoplasm;GO:0044464//cell part;GO:0044424//intracellular part;GO:0043229//intracellular organelle;GO:0043231//intracellular membrane-bounded organelle;GO:0005622//intracellular;GO:0043227//membrane-bounded organelle;GO:0043226//organelle	-	-
Unigene0000422	1.309	1.7529	2.0234	0.1584	9	11	14	1	--	-	-	-	-
Unigene0000423	1.435	0.6551	1.0694	0.2605	12	5	9	2	--	-	-	-	-
Unigene0000424	0.7939	0.8698	0.5259	0	3	3	2	0	--	-	-	-	-
Unigene0000425	1.1208	0.2456	1.3365	0	5	1	6	0	--	-	-	-	-
Unigene0000426	2.6144	2.3436	2.716	1.0354	22	18	23	8	PREDICTED: ethylene-responsive transcription factor ERF039-like [Cucumis sativus]	-	GO:0044424//intracellular part;GO:0043229//intracellular organelle;GO:0044464//cell part;GO:0005622//intracellular;GO:0005623//cell;GO:0043231//intracellular membrane-bounded organelle;GO:0043227//membrane-bounded organelle;GO:0043226//organelle	GO:0097159//organic cyclic compound binding;GO:0005488//binding;GO:0003676//nucleic acid binding;GO:1901363//heterocyclic compound binding;GO:0001071//nucleic acid binding transcription factor activity	GO:0044249//cellular biosynthetic process;GO:0044260//cellular macromolecule metabolic process;GO:0043170//macromolecule metabolic process;GO:0010468//regulation of gene expression;GO:1901576//organic substance biosynthetic process;GO:0019222//regulation of metabolic process;GO:0071704//organic substance metabolic process;GO:0065007//biological regulation;GO:0060255//regulation of macromolecule m…
Unigene0000427	1.0117	1.6626	1.0053	0.2755	4	6	4	1	PREDICTED: ethylene-responsive transcription factor ERF039-like [Cucumis melo]	-	-	-	-
Unigene0000428	1.4656	1.0705	1.2946	1.7736	9	6	8	10	--	-	-	-	-
Unigene0000429	0.8324	0.912	0.8272	0.6044	3	3	3	2	--	-	-	-	-
Unigene0000430	1.9847	1.0873	2.7611	1.7293	20	10	28	16	nucleotide-diphospho-sugar transferase family protein, partial [Medicago truncatula]	-	-	-	-
Unigene0000431	0	0	0	0	0	0	0	0	PREDICTED: cell number regulator 13 isoform X2 [Cucumis sativus]	-	-	-	-
Unigene0000432	0	0	0	0	0	0	0	0	PREDICTED: cell number regulator 13 isoform X2 [Cucumis sativus]	-	-	-	-
Unigene0000433	5.228	1.782	0	0	45	14	0	0	--	-	-	-	-
Unigene0000434	3.4004	2.3063	2.2527	0.1764	21	13	14	1	reverse transcriptase [Elaeis guineensis]	-	-	GO:0003824//catalytic activity;GO:0043169//cation binding;GO:0016779//nucleotidyltransferase activity;GO:0008233//peptidase activity;GO:0097159//organic cyclic compound binding;GO:0016740//transferase activity;GO:0046914//transition metal ion binding;GO:0043167//ion binding;GO:0046872//metal ion binding;GO:0070011//peptidase activity, acting on L-amino acid peptides;GO:0005488//binding;GO:0016772…	GO:0044260//cellular macromolecule metabolic process;GO:0046483//heterocycle metabolic process;GO:0044238//primary metabolic process;GO:0071704//organic substance metabolic process;GO:0009059//macromolecule biosynthetic process;GO:0006260//DNA replication;GO:0034641//cellular nitrogen compound metabolic process;GO:0034645//cellular macromolecule biosynthetic process;GO:0006139//nucleobase-contain…
Unigene0000435	1.3845	0.2167	2.9481	0.4308	7	1	15	2	--	-	-	-	-
Unigene0000436	0.6999	0	0.9273	0.2541	3	0	4	1	PREDICTED: V-type proton ATPase subunit G3 [Cucumis sativus]	ko00190//Oxidative phosphorylation//Energy metabolism//Metabolism;ko04145//Phagosome//Transport and catabolism//Cellular Processes	GO:0005623//cell;GO:0043226//organelle;GO:0044424//intracellular part;GO:0032991//macromolecular complex;GO:0043229//intracellular organelle;GO:0044425//membrane part;GO:0044422//organelle part;GO:0016020//membrane;GO:0043231//intracellular membrane-bounded organelle;GO:0033176//proton-transporting V-type ATPase complex;GO:0031090//organelle membrane;GO:0043234//protein complex;GO:0016469//proton…	GO:0022857//transmembrane transporter activity;GO:0005215//transporter activity	GO:0051234//establishment of localization;GO:0044763//single-organism cellular process;GO:1902578//single-organism localization;GO:0009987//cellular process;GO:0006818//hydrogen transport;GO:0044765//single-organism transport;GO:0006810//transport;GO:0044699//single-organism process;GO:0051179//localization
Unigene0000437	0	0.2437	1.3261	0.2422	0	1	6	1	--	-	-	-	-
Unigene0000438	3.2844	0.5682	1.2024	0.6903	57	9	21	11	non-ltr retroelement reverse transcriptase [Rosa rugosa]	-	-	-	-
Unigene0000439	0.9409	1.5463	0	0	4	6	0	0	--	-	-	-	-
Unigene0000440	0.4142	0	0	0	6	0	0	0	PREDICTED: ent-kaur-16-ene synthase, chloroplastic isoform X4 [Cucumis melo]	ko00904//Diterpenoid biosynthesis//Metabolism of terpenoids and polyketides//Metabolism	-	GO:0043169//cation binding;GO:0010333//terpene synthase activity;GO:0016835//carbon-oxygen lyase activity;GO:0003824//catalytic activity;GO:0046872//metal ion binding;GO:0016838//carbon-oxygen lyase activity, acting on phosphates;GO:0043167//ion binding;GO:0005488//binding;GO:0016829//lyase activity	-
Unigene0000441	1.0295	0.4834	0.682	0.2136	21	9	14	4	PREDICTED: ent-kaur-16-ene synthase, chloroplastic isoform X4 [Cucumis melo]	ko00904//Diterpenoid biosynthesis//Metabolism of terpenoids and polyketides//Metabolism	GO:0044424//intracellular part;GO:0005737//cytoplasm;GO:0043231//intracellular membrane-bounded organelle;GO:0044444//cytoplasmic part;GO:0043227//membrane-bounded organelle;GO:0043229//intracellular organelle;GO:0005623//cell;GO:0009536//plastid;GO:0005622//intracellular;GO:0044464//cell part;GO:0043226//organelle	GO:0016835//carbon-oxygen lyase activity;GO:0003824//catalytic activity;GO:0046872//metal ion binding;GO:0043167//ion binding;GO:0016829//lyase activity;GO:0005488//binding;GO:0016838//carbon-oxygen lyase activity, acting on phosphates;GO:0043169//cation binding;GO:0010333//terpene synthase activity	GO:0044763//single-organism cellular process;GO:0008152//metabolic process;GO:0044699//single-organism process;GO:0009987//cellular process
Unigene0000442	2.7972	0.2665	0.1209	1.5895	23	2	1	12	--	-	-	-	-
Unigene0000443	0.975	1.8694	4.2388	1.8584	8	14	35	14	PREDICTED: ankyrin repeat-containing protein At5g02620-like [Cucumis sativus]	-	-	-	-
Unigene0000444	0	0	0.3246	0	0	0	2	0	--	-	-	-	-
Unigene0000445	1.4157	2.5206	1.2309	0.3855	16	26	14	4	BnaC03g12770D [Brassica napus]	-	-	-	-
Unigene0000446	60.2894	86.3346	35.7026	32.9803	886	1158	528	445	calcium-binding EF hand family protein [Populus trichocarpa]	-	GO:0005622//intracellular;GO:0044464//cell part;GO:0044424//intracellular part;GO:0005737//cytoplasm;GO:0005623//cell;GO:0044444//cytoplasmic part	GO:0005488//binding;GO:0046872//metal ion binding;GO:0043167//ion binding;GO:0043169//cation binding	-
Unigene0000447	2.5925	2.7052	2.9443	1.8824	21	20	24	14	PREDICTED: naringenin,2-oxoglutarate 3-dioxygenase-like [Cucumis melo]	-	-	GO:0051213//dioxygenase activity;GO:0016705//oxidoreductase activity, acting on paired donors, with incorporation or reduction of molecular oxygen;GO:0043167//ion binding;GO:0046914//transition metal ion binding;GO:0046872//metal ion binding;GO:0003824//catalytic activity;GO:0043169//cation binding;GO:0005488//binding;GO:0016491//oxidoreductase activity;GO:0016706//oxidoreductase activity, acting…	GO:0044699//single-organism process;GO:0008152//metabolic process;GO:0044710//single-organism metabolic process
Unigene0000448	1.1239	1.2314	1.4359	0.1749	7	7	9	1	--	-	-	-	-
Unigene0000449	1.7062	0.3116	4.2388	0	12	2	30	0	--	-	-	-	-
Unigene0000450	1.0913	0.8968	1.0845	0.7429	8	6	8	5	PREDICTED: transposon Tf2-1 polyprotein isoform X1 [Beta vulgaris subsp. vulgaris]	-	-	-	-
Unigene0000451	0.652	0	1.5118	0.7101	6	0	14	6	PREDICTED: putative ribonuclease H protein At1g65750 [Malus domestica]	-	-	-	-
Unigene0000452	1.3705	3.5332	0.1602	0.5268	17	40	2	6	PREDICTED: LRR receptor-like serine/threonine-protein kinase GSO1-like [Citrus sinensis]	-	-	GO:0005488//binding;GO:0043167//ion binding	-
Unigene0000453	0	0.4622	0.2096	2.2972	0	2	1	10	PREDICTED: expansin-like A3 isoform X3 [Cucumis melo]	-	-	-	GO:0000003//reproduction
Unigene0000454	1.9458	1.8655	0	0.5298	8	7	0	2	hypothetical protein (mitochondrion) [Vicia faba]	-	GO:0043231//intracellular membrane-bounded organelle;GO:0044464//cell part;GO:0043227//membrane-bounded organelle;GO:0043229//intracellular organelle;GO:0005622//intracellular;GO:0005623//cell;GO:0043226//organelle;GO:0044424//intracellular part	-	-
Unigene0000455	0.9641	3.6218	2.3267	1.3501	7	24	17	9	PREDICTED: glutamate receptor 2.7-like [Cucumis melo]	-	-	-	GO:0044699//single-organism process
Unigene0000456	0.1669	0	0	0	2	0	0	0	integrase core domain containing protein [Oryza sativa Japonica Group]	-	GO:0043229//intracellular organelle;GO:0005623//cell;GO:0005622//intracellular;GO:0044464//cell part;GO:0043227//membrane-bounded organelle;GO:0044424//intracellular part;GO:0043231//intracellular membrane-bounded organelle;GO:0043226//organelle	GO:0097159//organic cyclic compound binding;GO:1901363//heterocyclic compound binding;GO:0005488//binding;GO:0003676//nucleic acid binding	GO:0006139//nucleobase-containing compound metabolic process;GO:0046483//heterocycle metabolic process;GO:0044260//cellular macromolecule metabolic process;GO:0008152//metabolic process;GO:0090304//nucleic acid metabolic process;GO:0044238//primary metabolic process;GO:0009987//cellular process;GO:1901360//organic cyclic compound metabolic process;GO:0006807//nitrogen compound metabolic process;G…
Unigene0000457	1.8661	3.3698	1.5797	1.6561	54	89	46	44	Retrovirus-related Pol polyprotein from transposon TNT 1-94, partial [Glycine soja]	-	-	GO:0005488//binding;GO:1901363//heterocyclic compound binding;GO:0097159//organic cyclic compound binding;GO:0003676//nucleic acid binding	GO:0046483//heterocycle metabolic process;GO:0006807//nitrogen compound metabolic process;GO:0034641//cellular nitrogen compound metabolic process;GO:0071704//organic substance metabolic process;GO:1901360//organic cyclic compound metabolic process;GO:0044237//cellular metabolic process;GO:0044260//cellular macromolecule metabolic process;GO:0044238//primary metabolic process;GO:0006259//DNA meta…
Unigene0000458	3.1475	0	0.6255	0	25	0	5	0	--	-	-	-	-
Unigene0000459	2.608	0.2381	0.4319	0	12	1	2	0	--	-	-	-	-
Unigene0000460	0.2432	0.533	1.2085	0	1	2	5	0	--	-	-	-	-
Unigene0000461	2.0498	1.2957	1.2535	1.0304	26	15	16	12	PREDICTED: pentatricopeptide repeat-containing protein At5g15300-like [Cucumis melo]	-	-	GO:0042623//ATPase activity, coupled;GO:0017111//nucleoside-triphosphatase activity;GO:0016462//pyrophosphatase activity;GO:0016787//hydrolase activity;GO:0003824//catalytic activity;GO:0016887//ATPase activity;GO:0016817//hydrolase activity, acting on acid anhydrides;GO:0016818//hydrolase activity, acting on acid anhydrides, in phosphorus-containing anhydrides	-
Unigene0000462	1.2372	1.0844	0.4918	0.8085	5	4	2	3	--	-	-	-	-
Unigene0000463	0	0	0	0	0	0	0	0	--	-	-	-	-
Unigene0000464	0	0	0.9236	0	0	0	4	0	--	-	-	-	-
Unigene0000465	13.102	12.4621	2.003	0.7057	364	316	56	18	PREDICTED: UDP-glucuronate 4-epimerase 1-like [Cucumis melo]	ko00500//Starch and sucrose metabolism//Carbohydrate metabolism//Metabolism;ko00520//Amino sugar and nucleotide sugar metabolism//Carbohydrate metabolism//Metabolism	GO:0043229//intracellular organelle;GO:0044446//intracellular organelle part;GO:0031224//intrinsic component of membrane;GO:0031984//organelle subcompartment;GO:0012505//endomembrane system;GO:0005622//intracellular;GO:0044422//organelle part;GO:0044464//cell part;GO:0044425//membrane part;GO:0016020//membrane;GO:0000139//Golgi membrane;GO:0031090//organelle membrane;GO:0044431//Golgi apparatus p…	GO:0003824//catalytic activity;GO:0048037//cofactor binding;GO:0005488//binding;GO:0016857//racemase and epimerase activity, acting on carbohydrates and derivatives;GO:0016854//racemase and epimerase activity;GO:0016853//isomerase activity	GO:0044238//primary metabolic process;GO:0008152//metabolic process
Unigene0000466	0.5862	1.1241	1.3108	0.3193	4	7	9	2	PREDICTED: terpene synthase 10 [Cucumis sativus]	-	GO:0005623//cell;GO:0043227//membrane-bounded organelle;GO:0005737//cytoplasm;GO:0043229//intracellular organelle;GO:0043226//organelle;GO:0044464//cell part;GO:0043231//intracellular membrane-bounded organelle;GO:0044424//intracellular part;GO:0005622//intracellular;GO:0044444//cytoplasmic part;GO:0009536//plastid	GO:0016829//lyase activity;GO:0016835//carbon-oxygen lyase activity;GO:0043167//ion binding;GO:0043169//cation binding;GO:0003824//catalytic activity;GO:0005488//binding;GO:0016838//carbon-oxygen lyase activity, acting on phosphates;GO:0046872//metal ion binding;GO:0010333//terpene synthase activity	GO:0008152//metabolic process
Unigene0000467	0	0	0	0	0	0	0	0	PREDICTED: probable GPI-anchored adhesin-like protein PGA55 isoform X2 [Cucumis melo]	-	-	-	-
Unigene0000468	1.0062	0.2544	0.3846	0.5901	26	6	10	14	PREDICTED: probable GPI-anchored adhesin-like protein PGA55 isoform X2 [Cucumis melo]	-	-	-	-
Unigene0000469	9.6089	6.4371	20.5155	62.2549	175	107	376	1041	PREDICTED: expansin-B3-like [Cucumis melo]	-	-	-	GO:0000003//reproduction
Unigene0000470	0.1201	2.4998	1.6706	1.3079	1	19	14	10	--	-	-	-	-
Unigene0000471	0.3294	0	0.8184	0	2	0	5	0	--	-	-	-	-
Unigene0000472	0.657	2.1595	1.3057	0.2385	3	9	6	1	--	-	-	-	-
Unigene0000473	1.827	0.8579	0.2594	0	7	3	1	0	--	-	-	-	-
Unigene0000474	0.9984	0.2735	0	0	4	1	0	0	--	-	-	-	-
Unigene0000475	0.6832	0.998	1.8103	0	3	4	8	0	--	-	-	-	-
Unigene0000476	1.6508	0	1.4354	0.2247	8	0	7	1	--	-	-	-	-
Unigene0000477	60.7905	125.915	44.1032	30.4683	904	1709	660	416	PREDICTED: peptide methionine sulfoxide reductase B5 [Cucumis sativus]	-	GO:0043227//membrane-bounded organelle;GO:0005623//cell;GO:0044464//cell part;GO:0043226//organelle;GO:0043231//intracellular membrane-bounded organelle;GO:0044424//intracellular part;GO:0043229//intracellular organelle;GO:0005622//intracellular	GO:0003824//catalytic activity;GO:0016491//oxidoreductase activity;GO:0016667//oxidoreductase activity, acting on a sulfur group of donors;GO:0005488//binding;GO:0016671//oxidoreductase activity, acting on a sulfur group of donors, disulfide as acceptor;GO:0043169//cation binding;GO:0043167//ion binding	GO:0009266//response to temperature stimulus;GO:0008152//metabolic process;GO:0006979//response to oxidative stress;GO:0044699//single-organism process;GO:0009409//response to cold;GO:0043170//macromolecule metabolic process;GO:0006643//membrane lipid metabolic process;GO:0009415//response to water;GO:0044763//single-organism cellular process;GO:0009991//response to extracellular stimulus;GO:0031…
Unigene0000478	1.828	9.6289	0.9082	0.2297	26	125	13	3	--	-	-	-	-
Unigene0000479	2.7996	4.8567	1.8547	2.6681	24	38	16	21	PREDICTED: CLAVATA3/ESR (CLE)-related protein 45-like [Solanum tuberosum]	-	-	-	-
Unigene0000480	1.4056	0.1711	1.8623	0.8505	9	1	12	5	--	-	-	-	-
Unigene0000481	0.219	0.2999	0.2176	0.9541	4	5	4	16	PREDICTED: secoisolariciresinol dehydrogenase-like [Cucumis melo]	-	-	GO:0016616//oxidoreductase activity, acting on the CH-OH group of donors, NAD or NADP as acceptor;GO:0003824//catalytic activity;GO:0016491//oxidoreductase activity;GO:0016614//oxidoreductase activity, acting on CH-OH group of donors	GO:0044699//single-organism process;GO:0008152//metabolic process;GO:0044710//single-organism metabolic process
Unigene0000482	0.9118	0.8741	1.1326	1.8621	16	14	20	30	PREDICTED: secoisolariciresinol dehydrogenase-like [Cucumis melo]	-	-	GO:0016491//oxidoreductase activity;GO:0003824//catalytic activity;GO:0016614//oxidoreductase activity, acting on CH-OH group of donors;GO:0016616//oxidoreductase activity, acting on the CH-OH group of donors, NAD or NADP as acceptor	GO:0044699//single-organism process;GO:0008152//metabolic process;GO:0044710//single-organism metabolic process
Unigene0000483	3.4264	2.2184	2.1667	0	22	13	14	0	--	-	-	-	-
Unigene0000484	0	1.5722	0.4753	0.521	0	6	2	2	--	-	-	-	-
Unigene0000485	2.2252	0.6095	0.5528	0.3029	16	4	4	2	--	-	-	-	-
Unigene0000486	0.6038	1.3231	0.6	0	3	6	3	0	PREDICTED: serine/threonine-protein kinase SMG1-like [Cucumis melo]	ko03015//mRNA surveillance pathway//Translation//Genetic Information Processing	-	GO:0016740//transferase activity;GO:0016772//transferase activity, transferring phosphorus-containing groups;GO:0003824//catalytic activity	GO:0008152//metabolic process;GO:0009987//cellular process
Unigene0000487	2.2673	1.0459	7.8855	12.9968	38	16	133	200	PREDICTED: GATA transcription factor 21 [Cucumis melo]	-	-	GO:0005488//binding	-
Unigene0000488	0	0	2.4	0.2923	0	0	9	1	--	-	-	-	-
Unigene0000489	0.4501	1.4794	0.8945	0	2	6	4	0	--	-	-	-	-
Unigene0000490	3.1406	0.3441	0.9363	0	20	2	6	0	--	-	-	-	-
Unigene0000491	17.1715	6.6524	17.5819	20.2264	724	256	746	783	PREDICTED: pentatricopeptide repeat-containing protein At2g30100, chloroplastic [Cucumis sativus]	-	GO:0043226//organelle;GO:0005623//cell;GO:0044424//intracellular part;GO:0044444//cytoplasmic part;GO:0005737//cytoplasm;GO:0044464//cell part;GO:0005622//intracellular;GO:0043227//membrane-bounded organelle;GO:0009536//plastid;GO:0043231//intracellular membrane-bounded organelle;GO:0043229//intracellular organelle	-	-
Unigene0000492	39.9491	48.5523	15.3669	13.9451	961	1066	372	308	PREDICTED: transcription factor UNE12-like isoform X2 [Cucumis sativus]	-	-	GO:0005488//binding;GO:0005515//protein binding	-
Unigene0000493	1.6671	0	0.4733	0.5188	7	0	2	2	--	-	-	-	-
Unigene0000494	1.2874	0.2821	1.0234	0.5609	5	1	4	2	--	-	-	-	-
Unigene0000495	1.2248	3.1313	1.42	0.667	6	14	7	3	--	-	-	-	-
Unigene0000496	0.3606	2.7658	0.5375	0.3928	2	14	3	2	--	-	-	-	-
Unigene0000497	0.1345	0.1474	0.6682	0	1	1	5	0	PREDICTED: lactoylglutathione lyase [Cucumis melo]	-	-	GO:0003824//catalytic activity	GO:0009987//cellular process;GO:0006629//lipid metabolic process;GO:0051235//maintenance of location;GO:0032501//multicellular organismal process;GO:0044238//primary metabolic process;GO:0044763//single-organism cellular process;GO:0051179//localization;GO:0065007//biological regulation;GO:0009266//response to temperature stimulus;GO:0044707//single-multicellular organism process;GO:0006950//resp…
Unigene0000498	1.8276	5.3857	3.8827	2.8828	29	78	62	42	PREDICTED: lactoylglutathione lyase [Cucumis melo]	-	-	GO:0003824//catalytic activity	GO:0051235//maintenance of location;GO:0009266//response to temperature stimulus;GO:0006950//response to stress;GO:0050896//response to stimulus;GO:0006720//isoprenoid metabolic process;GO:0009409//response to cold;GO:0006629//lipid metabolic process;GO:0065007//biological regulation;GO:0044238//primary metabolic process;GO:0032501//multicellular organismal process;GO:0044255//cellular lipid meta…
Unigene0000499	0.2443	1.8734	0.4855	0	1	7	2	0	--	-	-	-	-
Unigene0000500	0.958	1.0496	1.2693	0	6	6	8	0	--	-	-	-	-
Unigene0000501	2.1488	0	1.0677	0.4681	10	0	5	2	--	-	-	-	-
Unigene0000502	1.0162	0.835	1.0098	1.1068	4	3	4	4	--	-	-	-	-
Unigene0000503	1.6722	0.1666	1.2085	0.6623	11	1	8	4	--	-	-	-	-
Unigene0000504	0.2823	3.0926	1.2622	0	2	20	9	0	--	-	-	-	-
Unigene0000505	1.3355	0.5853	1.0617	0	5	2	4	0	--	-	-	-	-
Unigene0000506	1.1077	0	2.4217	0.9652	5	0	11	4	--	-	-	-	-
Unigene0000507	0.3902	0	0.7754	1.2748	2	0	4	6	--	-	-	-	-
Unigene0000508	0	0.5936	0	0	0	2	0	0	--	-	-	-	-
Unigene0000509	0	0.8501	0.514	4.5071	0	3	2	16	PREDICTED: chitinase 1-like [Cucumis sativus]	ko00520//Amino sugar and nucleotide sugar metabolism//Carbohydrate metabolism//Metabolism	-	GO:0016787//hydrolase activity;GO:0016798//hydrolase activity, acting on glycosyl bonds;GO:0005488//binding;GO:0097367//carbohydrate derivative binding;GO:0003824//catalytic activity;GO:0004553//hydrolase activity, hydrolyzing O-glycosyl compounds	GO:0071704//organic substance metabolic process;GO:0006022//aminoglycan metabolic process;GO:0071554//cell wall organization or biogenesis;GO:1901564//organonitrogen compound metabolic process;GO:0044260//cellular macromolecule metabolic process;GO:1901136//carbohydrate derivative catabolic process;GO:0009987//cellular process;GO:0006026//aminoglycan catabolic process;GO:0006807//nitrogen compoun…
Unigene0000510	0.3362	1.3815	2.0882	0.3662	4	15	25	4	--	-	-	-	-
Unigene0000511	0	0	0	0	0	0	0	0	--	-	-	-	-
Unigene0000512	1.5242	0.835	0	0.5534	6	3	0	2	--	-	-	-	-
Unigene0000513	0	0	0	0	0	0	0	0	PREDICTED: serine/threonine-protein kinase TIO-like, partial [Brassica rapa]	-	-	GO:0005488//binding;GO:0046914//transition metal ion binding;GO:0043167//ion binding;GO:0043169//cation binding;GO:0097159//organic cyclic compound binding;GO:0046872//metal ion binding	GO:0044238//primary metabolic process;GO:0090304//nucleic acid metabolic process;GO:0009987//cellular process;GO:0071704//organic substance metabolic process;GO:0046483//heterocycle metabolic process;GO:0044260//cellular macromolecule metabolic process;GO:0006725//cellular aromatic compound metabolic process;GO:0006139//nucleobase-containing compound metabolic process;GO:0044237//cellular metabol…
Unigene0000514	0	0.1915	0.6948	0	0	1	4	0	PREDICTED: serine/threonine-protein kinase TIO-like, partial [Brassica rapa]	-	-	GO:0046872//metal ion binding;GO:0005488//binding;GO:0043169//cation binding;GO:0043167//ion binding	-
Unigene0000515	1.4805	1.5063	1.839	1.5549	28	26	35	27	Ras guanine nucleotide exchange factor K [Theobroma cacao]	-	GO:0044424//intracellular part;GO:0043229//intracellular organelle;GO:0044464//cell part;GO:0005622//intracellular;GO:0005623//cell;GO:0043231//intracellular membrane-bounded organelle;GO:0043227//membrane-bounded organelle;GO:0043226//organelle	-	-
Unigene0000516	2.5919	0.5979	0.5422	0.1486	19	4	4	1	--	-	-	-	-
Unigene0000517	186.688	146.057	27.9666	5.5396	3854	2752	581	105	JHL23C09.7 [Jatropha curcas]	-	-	-	-
Unigene0000518	0	0.5719	2.5936	1.1371	0	2	10	4	PREDICTED: omega-hydroxypalmitate O-feruloyl transferase-like [Gossypium raimondii]	ko00073//Cutin, suberine and wax biosynthesis//Lipid metabolism//Metabolism	-	GO:0016746//transferase activity, transferring acyl groups;GO:0003824//catalytic activity;GO:0016740//transferase activity	-
Unigene0000519	0.2432	2.132	1.4502	0	1	8	6	0	PREDICTED: LRR receptor-like serine/threonine-protein kinase GSO1-like [Citrus sinensis]	-	-	-	-
Unigene0000520	1.8364	3.2696	1.1406	0.7501	8	13	5	3	--	-	-	-	-
Unigene0000521	0.3184	1.57	1.4239	3.4682	2	9	9	20	--	-	-	-	-
Unigene0000522	0	0.2834	0.771	3.0987	0	1	3	11	--	-	-	-	-
Unigene0000523	1.2958	1.4197	0.1431	0.3136	9	9	1	2	PREDICTED: WD repeat-containing protein 55 [Fragaria vesca subsp. vesca]	-	GO:0043226//organelle;GO:0044430//cytoskeletal part;GO:0005622//intracellular;GO:0043232//intracellular non-membrane-bounded organelle;GO:0005623//cell;GO:0005856//cytoskeleton;GO:0032991//macromolecular complex;GO:0043228//non-membrane-bounded organelle;GO:0044424//intracellular part;GO:0044446//intracellular organelle part;GO:0043229//intracellular organelle;GO:0044464//cell part;GO:0043234//pr…	GO:1901363//heterocyclic compound binding;GO:0005488//binding;GO:0097159//organic cyclic compound binding;GO:0036094//small molecule binding	-
Unigene0000524	1.3609	1.2426	0.4508	0.7411	6	5	2	3	--	-	-	-	-
Unigene0000525	2.5786	1.1772	0.6406	1.4042	12	5	3	6	--	-	-	-	-
Unigene0000526	0.5081	1.1134	1.0098	0	2	4	4	0	SIL1 [Cucumis melo subsp. melo]	-	-	-	-
Unigene0000527	1.3007	1.2668	0.8617	0.3935	18	16	12	5	PREDICTED: retrovirus-related Pol polyprotein from transposon TNT 1-94 isoform X3 [Cucumis melo]	-	-	-	-
Unigene0000528	1.4656	0.2676	1.9419	0	6	1	8	0	--	-	-	-	-
Unigene0000529	10.3469	7.8145	6.8379	7.8229	206	142	137	143	PREDICTED: aminoacyl tRNA synthase complex-interacting multifunctional protein 1 [Cucumis melo]	-	GO:0043226//organelle;GO:0044464//cell part;GO:0043227//membrane-bounded organelle;GO:0009536//plastid;GO:0043231//intracellular membrane-bounded organelle;GO:0005623//cell;GO:0044424//intracellular part;GO:0005622//intracellular;GO:0005737//cytoplasm;GO:0043229//intracellular organelle;GO:0044444//cytoplasmic part	GO:0005488//binding;GO:1901363//heterocyclic compound binding;GO:0016876//ligase activity, forming aminoacyl-tRNA and related compounds;GO:0003676//nucleic acid binding;GO:0003723//RNA binding;GO:0016874//ligase activity;GO:0097159//organic cyclic compound binding;GO:0003824//catalytic activity;GO:0004812//aminoacyl-tRNA ligase activity;GO:0016875//ligase activity, forming carbon-oxygen bonds	-
Unigene0000530	0	0	0.3963	0	0	0	6	0	PREDICTED: aminoacyl tRNA synthase complex-interacting multifunctional protein 1 [Cucumis melo]	-	-	GO:0003723//RNA binding;GO:0004812//aminoacyl-tRNA ligase activity;GO:0016876//ligase activity, forming aminoacyl-tRNA and related compounds;GO:0005488//binding;GO:0016875//ligase activity, forming carbon-oxygen bonds;GO:1901363//heterocyclic compound binding;GO:0003676//nucleic acid binding;GO:0097159//organic cyclic compound binding;GO:0003824//catalytic activity;GO:0016874//ligase activity	-
Unigene0000531	0	0	0	0	0	0	0	0	S-adenosyl-L-methionine-dependent methyltransferases superfamily protein [Theobroma cacao]	-	-	GO:0016740//transferase activity;GO:0016741//transferase activity, transferring one-carbon groups;GO:0003824//catalytic activity	GO:0008152//metabolic process
Unigene0000532	11.2174	12.0643	11.1468	12.6666	272	267	272	282	Ribosomal RNA small subunit methyltransferase A [Gossypium arboreum]	-	-	GO:0003824//catalytic activity;GO:0016741//transferase activity, transferring one-carbon groups;GO:0016740//transferase activity	GO:0008152//metabolic process
Unigene0000533	45.2634	17.4649	31.089	41.0066	761	268	526	633	PREDICTED: protein YLS9 [Prunus mume]	-	-	-	-
Unigene0000534	1.2205	0	1.4149	0	6	0	7	0	--	-	-	-	-
Unigene0000535	0	2.25	0.3401	0.5592	0	12	2	3	cytosolic glyceraldehyde-3-phosphate dehydrogenase, partial [Gracilariopsis lemaneiformis]	ko01200//Carbon metabolism//Global and Overview//Metabolism;ko01230//Biosynthesis of amino acids//Global and Overview//Metabolism;ko00010//Glycolysis / Gluconeogenesis//Carbohydrate metabolism//Metabolism;ko00710//Carbon fixation in photosynthetic organisms//Energy metabolism//Metabolism	GO:0044424//intracellular part;GO:0043231//intracellular membrane-bounded organelle;GO:0043229//intracellular organelle;GO:0005622//intracellular;GO:0043227//membrane-bounded organelle;GO:0043226//organelle;GO:0044464//cell part;GO:0005623//cell	GO:0097159//organic cyclic compound binding;GO:0036094//small molecule binding;GO:0003824//catalytic activity;GO:1901363//heterocyclic compound binding;GO:0016491//oxidoreductase activity;GO:0016903//oxidoreductase activity, acting on the aldehyde or oxo group of donors;GO:0005488//binding;GO:0000166//nucleotide binding;GO:0016620//oxidoreductase activity, acting on the aldehyde or oxo group of d…	GO:0071704//organic substance metabolic process;GO:0044699//single-organism process;GO:0044723//single-organism carbohydrate metabolic process;GO:0006082//organic acid metabolic process;GO:0043436//oxoacid metabolic process;GO:0032787//monocarboxylic acid metabolic process;GO:0005975//carbohydrate metabolic process;GO:0044763//single-organism cellular process;GO:0005996//monosaccharide metabolic …
Unigene0000536	0.6992	1.3406	0.6948	1.5231	4	7	4	8	--	-	-	-	-
Unigene0000537	0.4824	0.2642	2.1569	0	2	1	9	0	--	-	-	-	-
Unigene0000538	2.0598	2.0687	1.0234	0	12	11	6	0	--	-	-	-	-
Unigene0000539	0.9219	0.2525	0.6871	1.0041	4	1	3	4	--	-	-	-	-
Unigene0000540	0	1.1597	0.5259	0.8647	0	4	2	3	--	-	-	-	-
Unigene0000541	37.6114	29.3498	40.5762	42.2261	1039	740	1128	1071	PREDICTED: translation initiation factor eIF-2B subunit alpha [Cucumis melo]	ko03013//RNA transport//Translation//Genetic Information Processing	-	GO:0005488//binding;GO:1901363//heterocyclic compound binding;GO:0003676//nucleic acid binding;GO:0008135//translation factor activity, RNA binding;GO:0097159//organic cyclic compound binding;GO:0003723//RNA binding	GO:0019538//protein metabolic process;GO:0006412//translation;GO:0008152//metabolic process;GO:0044249//cellular biosynthetic process;GO:0034645//cellular macromolecule biosynthetic process;GO:0071704//organic substance metabolic process;GO:1901576//organic substance biosynthetic process;GO:0009058//biosynthetic process;GO:0044267//cellular protein metabolic process;GO:0010467//gene expression;GO…
Unigene0000542	6.3418	2.4685	1.3267	0.8179	76	27	16	9	PREDICTED: protein ALUMINUM SENSITIVE 3 [Cucumis sativus]	-	GO:0031224//intrinsic component of membrane;GO:0044425//membrane part;GO:0016020//membrane	-	GO:0042221//response to chemical;GO:0010038//response to metal ion;GO:0010035//response to inorganic substance;GO:0050896//response to stimulus
Unigene0000543	1.6124	4.8582	0	0.3512	20	55	0	4	--	-	-	-	-
Unigene0000544	4.1256	7.4364	27.2426	52.3985	62	102	412	723	PREDICTED: CASP-like protein VIT_05s0020g01830 [Cucumis melo]	-	GO:0016020//membrane	-	-
Unigene0000545	0	0	1.9748	0.2061	0	0	21	2	PREDICTED: CASP-like protein VIT_05s0020g01830 [Cucumis melo]	-	GO:0016020//membrane	-	-
Unigene0000546	0.9063	2.2696	1.7368	0.282	14	32	27	4	PREDICTED: suppressor protein SRP40-like [Citrus sinensis]	-	-	-	-
Unigene0000547	0.4928	0.8098	0.7345	0.2683	2	3	3	1	gag-pol polyprotein [Vitis vinifera]	-	-	GO:0005488//binding	-
Unigene0000548	1.9389	1.7845	1.5414	0	25	21	20	0	PREDICTED: putative ribonuclease H protein At1g65750 [Cucumis melo]	-	-	-	-
Unigene0000549	0.8273	0.4944	1.0463	0.1638	11	6	14	2	--	-	-	-	-
Unigene0000550	0	0.2257	0	0	0	2	0	0	--	-	-	-	-
Unigene0000551	5.6098	12.1265	1.356	0	37	73	9	0	--	-	-	-	-
Unigene0000552	0.5149	0.5642	1.0234	0	2	2	4	0	--	-	-	-	-
Unigene0000553	0	1.2609	2.0966	0.8356	0	6	11	4	--	-	-	-	-
Unigene0000554	1.6101	0.8821	0	0.8768	8	4	0	4	--	-	-	-	-
Unigene0000555	2.4657	0	0.4455	1.4648	11	0	2	6	--	-	-	-	-
Unigene0000556	3.4125	2.2433	0.3391	0	20	12	2	0	--	-	-	-	-
Unigene0000557	2.2617	0.9011	0	0	11	4	0	0	--	-	-	-	-
Unigene0000558	1.8664	1.0225	0	0	8	4	0	0	--	-	-	-	-
Unigene0000559	2.5747	0	0.2559	0	10	0	1	0	hypothetical protein PRUPE_ppa015871mg, partial [Prunus persica]	-	-	-	-
Unigene0000560	0	0	0	0	0	0	0	0	--	-	-	-	-
Unigene0000561	0	0	0	0	0	0	0	0	--	-	-	-	-
Unigene0000562	0	0	0	0	0	0	0	0	--	-	-	-	-
Unigene0000563	0	0	0	0	0	0	0	0	--	-	-	-	-
Unigene0000564	1.5743	1.9902	2.2864	0.9233	13	15	19	7	--	-	-	-	-
Unigene0000565	0.2646	1.4497	0.7889	0.5764	1	5	3	2	NBS-LRR resistance protein, partial [Luffa aegyptiaca]	-	-	GO:0097367//carbohydrate derivative binding;GO:0005488//binding;GO:0001882//nucleoside binding;GO:0032550//purine ribonucleoside binding;GO:0032549//ribonucleoside binding;GO:0036094//small molecule binding;GO:0097159//organic cyclic compound binding;GO:0001883//purine nucleoside binding;GO:1901363//heterocyclic compound binding	-
Unigene0000566	0.3032	9.4687	0.6026	0	2	57	4	0	PREDICTED: endoplasmic reticulum oxidoreductin-1-like [Malus domestica]	ko04141//Protein processing in endoplasmic reticulum//Folding, sorting and degradation//Genetic Information Processing	-	-	-
Unigene0000567	3.1891	0.4032	0	0.8016	26	3	0	6	PREDICTED: salicylic acid-binding protein 2-like [Cucumis melo]	-	-	-	-
Unigene0000568	0.8931	0.7339	0.4437	0	4	3	2	0	--	-	-	-	-
Unigene0000569	1.3797	0.6479	1.5669	0.4293	7	3	8	2	--	-	-	-	-
Unigene0000570	0	2.7468	0.9965	0	0	10	4	0	--	-	-	-	-
Unigene0000571	0	1.8266	1.1833	0	0	7	5	0	--	-	-	-	-
Unigene0000572	0.8634	0.3784	1.3728	1.6927	5	2	8	9	Os01g0136200 [Oryza sativa Japonica Group]	ko04141//Protein processing in endoplasmic reticulum//Folding, sorting and degradation//Genetic Information Processing	GO:0044424//intracellular part;GO:0005622//intracellular;GO:0044464//cell part;GO:0005623//cell	-	GO:0071840//cellular component organization or biogenesis;GO:0022607//cellular component assembly;GO:0050896//response to stimulus;GO:0071822//protein complex subunit organization;GO:0044085//cellular component biogenesis;GO:0043933//macromolecular complex subunit organization;GO:0006461//protein complex assembly;GO:0070271//protein complex biogenesis;GO:0065003//macromolecular complex assembly;G…
Unigene0000573	0.6621	0.4836	2.4123	0	3	2	11	0	--	-	-	-	-
Unigene0000574	0	0	0	0	0	0	0	0	Sushi, von Willebrand factor type A, EGF and pentraxin domain-containing 1 [Gossypium arboreum]	-	-	-	-
Unigene0000575	0	0	0	0	0	0	0	0	Sushi, von Willebrand factor type A, EGF and pentraxin domain-containing 1 [Gossypium arboreum]	-	-	-	-
Unigene0000576	1.3024	0.3171	1.1504	1.8913	9	2	8	12	--	-	-	-	-
Unigene0000577	2.333	1.0225	0	0.5082	10	4	0	2	--	-	-	-	-
Unigene0000578	3.4738	4.844	0.7845	0.3439	22	28	5	2	transcription factor KAN2 [Medicago truncatula]	-	-	-	GO:0048856//anatomical structure development;GO:0048731//system development;GO:0032501//multicellular organismal process;GO:0009987//cellular process;GO:0007389//pattern specification process;GO:0044699//single-organism process;GO:0044767//single-organism developmental process;GO:0032502//developmental process;GO:0048513//organ development;GO:0003002//regionalization;GO:0007275//multicellular org…
Unigene0000579	2.0512	1.3484	1.0871	0.2979	15	9	8	2	--	-	-	-	-
Unigene0000580	0.7057	3.0926	2.1037	1.281	3	12	9	5	--	-	-	-	-
Unigene0000581	2.0932	0.7056	4.48	0.5261	13	4	28	3	--	-	-	-	-
Unigene0000582	0	0	0	0	0	0	0	0	--	-	-	-	-
Unigene0000583	0.8137	0	0	0	4	0	0	0	--	-	-	-	-
Unigene0000584	0	0.2328	1.2669	0.6943	0	1	6	3	PREDICTED: histone acetyltransferase HAC1-like [Malus domestica]	-	-	-	-
Unigene0000585	24.169	20.4825	25.3472	24.0323	1011	782	1067	923	PREDICTED: E3 ubiquitin-protein ligase arih1 [Cucumis sativus]	-	-	GO:0005488//binding;GO:0043169//cation binding;GO:0043167//ion binding;GO:0003824//catalytic activity;GO:0046914//transition metal ion binding;GO:0097159//organic cyclic compound binding;GO:0046872//metal ion binding	-
Unigene0000586	0.6102	1.3372	1.0107	0	3	6	5	0	--	-	-	-	-
Unigene0000587	0.8406	0.7535	2.2021	0	11	9	29	0	--	-	-	-	-
Unigene0000588	1.5002	5.0956	1.1926	0.9804	10	31	8	6	--	-	-	-	-
Unigene0000589	0.2352	0.5154	1.8699	2.0495	1	2	8	8	PREDICTED: pentatricopeptide repeat-containing protein At5g56310-like [Cucumis melo]	-	-	-	-
Unigene0000590	0.3798	0.4161	1.1322	2.2751	2	2	6	11	PREDICTED: pentatricopeptide repeat-containing protein At5g56310-like [Cucumis melo]	-	-	-	-
Unigene0000591	1.1319	1.0334	1.3122	0.2055	6	5	7	1	--	-	-	-	-
Unigene0000592	1.9267	1.3291	1.6309	0.2332	27	17	23	3	--	-	-	-	-
Unigene0000593	0.254	0.5567	0.5049	1.6601	1	2	2	6	--	-	-	-	-
Unigene0000594	0.2002	0	0.1989	0.6542	2	0	2	6	PREDICTED: ER lumen protein-retaining receptor [Cucumis sativus]	-	GO:0043229//intracellular organelle;GO:0044424//intracellular part;GO:0044464//cell part;GO:0043231//intracellular membrane-bounded organelle;GO:0005622//intracellular;GO:0031224//intrinsic component of membrane;GO:0044425//membrane part;GO:0005623//cell;GO:0016020//membrane;GO:0043227//membrane-bounded organelle;GO:0043226//organelle	GO:0033218//amide binding;GO:0042277//peptide binding;GO:0005488//binding;GO:0005048//signal sequence binding	GO:1902578//single-organism localization;GO:0048519//negative regulation of biological process;GO:0045185//maintenance of protein location;GO:0070727//cellular macromolecule localization;GO:0051235//maintenance of location;GO:0044699//single-organism process;GO:0034613//cellular protein localization;GO:0051224//negative regulation of protein transport;GO:0032879//regulation of localization;GO:005…
Unigene0000595	61.2498	55.0966	50.0248	61.542	1123	922	923	1036	PREDICTED: ER lumen protein-retaining receptor [Cucumis sativus]	-	GO:0043226//organelle;GO:0044424//intracellular part;GO:0005622//intracellular;GO:0044464//cell part;GO:0043227//membrane-bounded organelle;GO:0016020//membrane;GO:0043229//intracellular organelle;GO:0005623//cell;GO:0044425//membrane part;GO:0043231//intracellular membrane-bounded organelle;GO:0031224//intrinsic component of membrane	GO:0005488//binding;GO:0042277//peptide binding;GO:0033218//amide binding;GO:0005048//signal sequence binding	GO:0044699//single-organism process;GO:0050789//regulation of biological process;GO:1901615//organic hydroxy compound metabolic process;GO:0006694//steroid biosynthetic process;GO:0006793//phosphorus metabolic process;GO:0045185//maintenance of protein location;GO:0002684//positive regulation of immune system process;GO:0051235//maintenance of location;GO:0051220//cytoplasmic sequestering of prot…
Unigene0000596	0.2586	1.7003	0	0.2817	1	6	0	1	gag/pol protein [Bryonia dioica]	-	-	GO:0043169//cation binding;GO:0046872//metal ion binding;GO:0005488//binding;GO:0046914//transition metal ion binding;GO:0097159//organic cyclic compound binding;GO:0043167//ion binding	GO:0043170//macromolecule metabolic process;GO:0034641//cellular nitrogen compound metabolic process;GO:0071704//organic substance metabolic process;GO:0006725//cellular aromatic compound metabolic process;GO:0046483//heterocycle metabolic process;GO:0090304//nucleic acid metabolic process;GO:0006139//nucleobase-containing compound metabolic process;GO:0006259//DNA metabolic process;GO:0008152//m…
Unigene0000597	1.3718	0.501	0.9088	0	6	2	4	0	--	-	-	-	-
Unigene0000598	1.8667	1.481	1.5991	1.1217	29	21	25	16	PREDICTED: protein PLASTID MOVEMENT IMPAIRED 2 isoform X2 [Cucumis melo]	-	-	-	-
Unigene0000599	0	0.262	0.713	2.0838	0	1	3	8	--	-	-	-	-
Unigene0000600	2.7547	0	0	0.375	16	0	0	2	--	-	-	-	-
Unigene0000601	0.7596	1.6645	0.5661	0	4	8	3	0	--	-	-	-	-
Unigene0000602	0.9041	0.6604	0.0998	0	9	6	1	0	PREDICTED: chloride conductance regulatory protein ICln isoform X1 [Cucumis sativus]	ko03013//RNA transport//Translation//Genetic Information Processing	GO:1902494//catalytic complex;GO:0005622//intracellular;GO:0016020//membrane;GO:0032991//macromolecular complex;GO:0043226//organelle;GO:0043231//intracellular membrane-bounded organelle;GO:0043229//intracellular organelle;GO:0044424//intracellular part;GO:0005737//cytoplasm;GO:0044444//cytoplasmic part;GO:0043227//membrane-bounded organelle;GO:0034708//methyltransferase complex;GO:0005623//cell;…	GO:0015075//ion transmembrane transporter activity;GO:0022857//transmembrane transporter activity;GO:0005215//transporter activity;GO:0022891//substrate-specific transmembrane transporter activity;GO:0022892//substrate-specific transporter activity	GO:0000375//RNA splicing, via transesterification reactions;GO:0065008//regulation of biological quality;GO:0071840//cellular component organization or biogenesis;GO:0034641//cellular nitrogen compound metabolic process;GO:0051234//establishment of localization;GO:0006139//nucleobase-containing compound metabolic process;GO:0019538//protein metabolic process;GO:0006464//cellular protein modificat…
Unigene0000603	23.6028	27.0357	26.4156	29.537	396	414	446	455	PREDICTED: chloride conductance regulatory protein ICln isoform X1 [Cucumis sativus]	ko03013//RNA transport//Translation//Genetic Information Processing	GO:0043234//protein complex;GO:0044464//cell part;GO:0016020//membrane;GO:0005622//intracellular;GO:1990234//transferase complex;GO:0005737//cytoplasm;GO:0044424//intracellular part;GO:0043229//intracellular organelle;GO:0005623//cell;GO:1902494//catalytic complex;GO:0034708//methyltransferase complex;GO:0032991//macromolecular complex;GO:0043227//membrane-bounded organelle;GO:0043226//organelle;…	GO:0005215//transporter activity;GO:0015075//ion transmembrane transporter activity;GO:0022892//substrate-specific transporter activity;GO:0022857//transmembrane transporter activity;GO:0022891//substrate-specific transmembrane transporter activity	GO:0008104//protein localization;GO:0070646//protein modification by small protein removal;GO:0008380//RNA splicing;GO:0071702//organic substance transport;GO:0046483//heterocycle metabolic process;GO:0009416//response to light stimulus;GO:0006807//nitrogen compound metabolic process;GO:0044763//single-organism cellular process;GO:0000375//RNA splicing, via transesterification reactions;GO:009030…
Unigene0000604	0	1.1997	0.4352	1.1926	0	5	2	5	PREDICTED: G-type lectin S-receptor-like serine/threonine-protein kinase RLK1 [Cucumis melo]	-	-	GO:0016773//phosphotransferase activity, alcohol group as acceptor;GO:0097159//organic cyclic compound binding;GO:1901363//heterocyclic compound binding;GO:0016853//isomerase activity;GO:0004672//protein kinase activity;GO:0001883//purine nucleoside binding;GO:0016854//racemase and epimerase activity;GO:0032550//purine ribonucleoside binding;GO:0005488//binding;GO:0097367//carbohydrate derivative…	GO:0044237//cellular metabolic process;GO:0043170//macromolecule metabolic process;GO:0006464//cellular protein modification process;GO:0036211//protein modification process;GO:0044260//cellular macromolecule metabolic process;GO:0044763//single-organism cellular process;GO:0044699//single-organism process;GO:0006793//phosphorus metabolic process;GO:0009987//cellular process;GO:0019538//protein m…
Unigene0000605	0.8051	0	5.28	0	5	0	33	0	--	-	-	-	-
Unigene0000606	0.1941	2.5518	1.1572	0.7399	2	24	12	7	PREDICTED: dentin sialophosphoprotein isoform X3 [Cucumis melo]	-	-	-	-
Unigene0000607	0.5367	0	2.4	0	2	0	9	0	--	-	-	-	-
Unigene0000608	1.5922	1.0467	1.4239	0	10	6	9	0	--	-	-	-	-
Unigene0000609	3.7334	2.0687	3.9231	0.5609	87	44	92	12	PREDICTED: ATP-dependent Clp protease proteolytic subunit-related protein 4, chloroplastic [Cucumis melo]	-	GO:0044464//cell part;GO:0005737//cytoplasm;GO:0009526//plastid envelope;GO:0044424//intracellular part;GO:0044446//intracellular organelle part;GO:0043231//intracellular membrane-bounded organelle;GO:0005622//intracellular;GO:0044422//organelle part;GO:0009536//plastid;GO:0043227//membrane-bounded organelle;GO:0005623//cell;GO:0043229//intracellular organelle;GO:0031975//envelope;GO:0009532//pla…	GO:0008233//peptidase activity;GO:0003824//catalytic activity;GO:0070011//peptidase activity, acting on L-amino acid peptides;GO:0004175//endopeptidase activity;GO:0016787//hydrolase activity	GO:0071704//organic substance metabolic process;GO:0010467//gene expression;GO:0043207//response to external biotic stimulus;GO:0008104//protein localization;GO:0051179//localization;GO:0006090//pyruvate metabolic process;GO:0019538//protein metabolic process;GO:0098542//defense response to other organism;GO:0044699//single-organism process;GO:0044281//small molecule metabolic process;GO:0006950/…
Unigene0000610	0.9855	0.6399	1.2332	0.318	27	16	34	8	PREDICTED: ATP-dependent Clp protease proteolytic subunit-related protein 4, chloroplastic [Cucumis melo]	-	GO:0009536//plastid;GO:0009532//plastid stroma;GO:0044424//intracellular part;GO:0043231//intracellular membrane-bounded organelle;GO:0005622//intracellular;GO:0044444//cytoplasmic part;GO:0031975//envelope;GO:0044446//intracellular organelle part;GO:0044464//cell part;GO:0043229//intracellular organelle;GO:0031967//organelle envelope;GO:0005737//cytoplasm;GO:0043226//organelle;GO:0009526//plasti…	GO:0004175//endopeptidase activity;GO:0016787//hydrolase activity;GO:0070011//peptidase activity, acting on L-amino acid peptides;GO:0008233//peptidase activity;GO:0003824//catalytic activity	GO:0002376//immune system process;GO:0051707//response to other organism;GO:0045087//innate immune response;GO:0006950//response to stress;GO:0050896//response to stimulus;GO:0043207//response to external biotic stimulus;GO:0009987//cellular process;GO:0044763//single-organism cellular process;GO:0006955//immune response;GO:0043170//macromolecule metabolic process;GO:0044237//cellular metabolic p…
Unigene0000611	2.3555	0.5161	0.6242	0	15	3	4	0	--	-	-	-	-
Unigene0000612	3.6653	3.2561	3.6423	4.2079	37	30	37	39	chlororespiratory reduction 42 [Hypseocharis bilobata]	-	-	-	GO:0071822//protein complex subunit organization;GO:0090304//nucleic acid metabolic process;GO:0044085//cellular component biogenesis;GO:0065003//macromolecular complex assembly;GO:0034622//cellular macromolecular complex assembly;GO:0006461//protein complex assembly;GO:0071840//cellular component organization or biogenesis;GO:0006725//cellular aromatic compound metabolic process;GO:0046483//hete…
Unigene0000613	0	0.2676	0.4855	0	0	1	2	0	PREDICTED: putative ribonuclease H protein At1g65750 [Cucumis melo]	-	-	-	GO:0009987//cellular process
Unigene0000614	2.5132	2.6124	2.7535	3.8602	39	37	43	55	PREDICTED: maf-like protein DDB_G0281937 [Cucumis sativus]	-	GO:0005622//intracellular;GO:0005623//cell;GO:0044464//cell part;GO:0044424//intracellular part	-	-
Unigene0000615	0.7385	0.9709	1.0274	0.6435	5	6	7	4	PREDICTED: kinesin-like calmodulin-binding protein isoform X2 [Cucumis melo]	-	GO:0043232//intracellular non-membrane-bounded organelle;GO:0005622//intracellular;GO:0043226//organelle;GO:0005856//cytoskeleton;GO:0015630//microtubule cytoskeleton;GO:0044464//cell part;GO:0043234//protein complex;GO:0043229//intracellular organelle;GO:0044424//intracellular part;GO:0005875//microtubule associated complex;GO:0044446//intracellular organelle part;GO:0044422//organelle part;GO:0…	GO:0016817//hydrolase activity, acting on acid anhydrides;GO:0017111//nucleoside-triphosphatase activity;GO:0003824//catalytic activity;GO:0032550//purine ribonucleoside binding;GO:0036094//small molecule binding;GO:0097159//organic cyclic compound binding;GO:0003774//motor activity;GO:0016818//hydrolase activity, acting on acid anhydrides, in phosphorus-containing anhydrides;GO:0001882//nucleosi…	GO:0044699//single-organism process;GO:0007017//microtubule-based process;GO:0009987//cellular process;GO:0044763//single-organism cellular process
Unigene0000616	1.1303	1.0615	1.6045	0.7034	7	6	10	4	--	-	-	-	-
Unigene0000617	1.0312	0.4842	0.8783	0.1605	7	3	6	1	--	-	-	-	-
Unigene0000618	60.7582	62.6978	59.0754	61.1502	1857	1749	1817	1716	PREDICTED: BSD domain-containing protein 1 [Cucumis sativus]	-	-	-	-
Unigene0000619	1.5518	0.8501	1.2851	0	6	3	5	0	PREDICTED: uncharacterized protein LOC103485300 [Cucumis melo]	-	-	-	-
Unigene0000620	3.3862	2.0776	0.5384	0.5901	25	14	4	4	--	-	-	-	-
Unigene0000621	0.3402	1.4911	2.1976	0	2	8	13	0	PREDICTED: transmembrane 9 superfamily member 4-like [Cucumis melo]	-	GO:0031224//intrinsic component of membrane;GO:0044425//membrane part;GO:0016020//membrane	-	GO:0044238//primary metabolic process;GO:0043170//macromolecule metabolic process;GO:0019538//protein metabolic process;GO:0008152//metabolic process;GO:0009058//biosynthetic process;GO:0044237//cellular metabolic process;GO:0034645//cellular macromolecule biosynthetic process;GO:0009059//macromolecule biosynthetic process;GO:0071704//organic substance metabolic process;GO:0009987//cellular proce…
Unigene0000622	4.3261	1.185	2.848	2.8271	80	20	53	48	PREDICTED: E3 ubiquitin-protein ligase SGR9, amyloplastic [Cucumis melo]	-	-	GO:0043167//ion binding;GO:0046872//metal ion binding;GO:0046914//transition metal ion binding;GO:0043169//cation binding;GO:0005488//binding	-
Unigene0000623	0	0	0	0	0	0	0	0	PREDICTED: E3 ubiquitin-protein ligase SGR9, amyloplastic [Cucumis melo]	-	-	GO:0005488//binding;GO:0046872//metal ion binding;GO:0043167//ion binding;GO:0046914//transition metal ion binding;GO:0043169//cation binding	-
Unigene0000624	0.7175	0	0.713	0.521	3	0	3	2	BnaC03g51330D [Brassica napus]	-	-	-	-
Unigene0000625	1.2162	0.3807	1.2085	0.1892	7	2	7	1	--	-	-	-	-
Unigene0000626	0.522	0.286	1.2968	0	2	1	5	0	--	-	-	-	-
Unigene0000627	4.8952	5.5246	3.5843	12.4269	133	137	98	310	PREDICTED: UDP-glycosyltransferase 91A1-like [Cucumis melo]	-	-	GO:0003824//catalytic activity;GO:0016740//transferase activity;GO:0016757//transferase activity, transferring glycosyl groups	-
Unigene0000628	0.6784	1.3008	1.3484	0	4	7	8	0	--	-	-	-	-
Unigene0000629	0	0	0	0	0	0	0	0	PREDICTED: nuclear pore complex protein NUP1 isoform X1 [Cucumis sativus]	-	-	-	-
Unigene0000630	0	0	0	0	0	0	0	0	PREDICTED: nuclear pore complex protein NUP1 isoform X1 [Cucumis sativus]	-	-	-	-
Unigene0000631	2.3816	0.6958	2.5244	1.0376	15	4	16	6	PREDICTED: transposon Tf2-1 polyprotein isoform X1 [Beta vulgaris subsp. vulgaris]	-	GO:0005623//cell;GO:0005622//intracellular;GO:0044424//intracellular part;GO:0044464//cell part;GO:0043226//organelle;GO:0043227//membrane-bounded organelle;GO:0043229//intracellular organelle;GO:0043231//intracellular membrane-bounded organelle	-	GO:0018130//heterocycle biosynthetic process;GO:1901360//organic cyclic compound metabolic process;GO:0071704//organic substance metabolic process;GO:0008152//metabolic process;GO:0009059//macromolecule biosynthetic process;GO:0090304//nucleic acid metabolic process;GO:0097659//nucleic acid-templated transcription;GO:0006351//transcription, DNA-templated;GO:1901362//organic cyclic compound biosyn…
Unigene0000632	1.1341	0.497	1.8032	0.7411	5	2	8	3	ty3-gypsy retrotransposon protein [Cucumis melo subsp. melo]	-	GO:0043231//intracellular membrane-bounded organelle;GO:0044464//cell part;GO:0005622//intracellular;GO:0043227//membrane-bounded organelle;GO:0044424//intracellular part;GO:0005623//cell;GO:0043226//organelle;GO:0043229//intracellular organelle	-	GO:0009889//regulation of biosynthetic process;GO:2001141//regulation of RNA biosynthetic process;GO:0010468//regulation of gene expression;GO:0031326//regulation of cellular biosynthetic process;GO:0060255//regulation of macromolecule metabolic process;GO:2000112//regulation of cellular macromolecule biosynthetic process;GO:0080090//regulation of primary metabolic process;GO:0006355//regulation …
Unigene0000633	0.9688	0	0	1.5828	4	0	0	6	gag-pol polyprotein [Vitis vinifera]	-	-	GO:0003824//catalytic activity;GO:0036094//small molecule binding;GO:1901363//heterocyclic compound binding;GO:0016462//pyrophosphatase activity;GO:0005488//binding;GO:0043167//ion binding;GO:0043169//cation binding;GO:0016787//hydrolase activity;GO:0046914//transition metal ion binding;GO:0046872//metal ion binding;GO:0016817//hydrolase activity, acting on acid anhydrides;GO:0016818//hydrolase a…	GO:0051234//establishment of localization;GO:1901360//organic cyclic compound metabolic process;GO:0006807//nitrogen compound metabolic process;GO:0071704//organic substance metabolic process;GO:0046483//heterocycle metabolic process;GO:0090304//nucleic acid metabolic process;GO:0034641//cellular nitrogen compound metabolic process;GO:0006139//nucleobase-containing compound metabolic process;GO:0…
Unigene0000634	1.6331	0.2556	0.4637	0.7623	7	1	2	3	--	-	-	-	-
Unigene0000635	5.662	1.7724	0.5358	0	21	6	2	0	--	-	-	-	-
Unigene0000636	2.3816	2.0875	2.3666	0.1729	15	12	15	1	--	-	-	-	-
Unigene0000637	20.9699	11.0851	10.1827	14.7396	485	234	237	313	hypothetical protein Csa_1G042410 [Cucumis sativus]	-	-	-	-
Unigene0000638	0	0	0	0	0	0	0	0	PREDICTED: kinesin-like protein KIF22 [Cucumis sativus]	-	GO:0032991//macromolecular complex;GO:0005623//cell;GO:0043226//organelle;GO:0043234//protein complex;GO:0043229//intracellular organelle;GO:0043228//non-membrane-bounded organelle;GO:0005856//cytoskeleton;GO:0044422//organelle part;GO:0044430//cytoskeletal part;GO:0005875//microtubule associated complex;GO:0044446//intracellular organelle part;GO:0044464//cell part;GO:0044424//intracellular part…	GO:0003774//motor activity;GO:0005488//binding;GO:0032549//ribonucleoside binding;GO:0005515//protein binding;GO:0003824//catalytic activity;GO:0016462//pyrophosphatase activity;GO:0016818//hydrolase activity, acting on acid anhydrides, in phosphorus-containing anhydrides;GO:0001883//purine nucleoside binding;GO:0036094//small molecule binding;GO:0008092//cytoskeletal protein binding;GO:0032550//…	GO:0050789//regulation of biological process;GO:0019538//protein metabolic process;GO:0045892//negative regulation of transcription, DNA-templated;GO:0043933//macromolecular complex subunit organization;GO:0048367//shoot system development;GO:0010468//regulation of gene expression;GO:0010558//negative regulation of macromolecule biosynthetic process;GO:0044710//single-organism metabolic process;G…
Unigene0000639	0	0	0	0	0	0	0	0	PREDICTED: kinesin-like protein KIF22 [Cucumis sativus]	-	GO:0043228//non-membrane-bounded organelle;GO:0043232//intracellular non-membrane-bounded organelle;GO:0005856//cytoskeleton;GO:0043226//organelle;GO:0043229//intracellular organelle;GO:0044422//organelle part;GO:0043234//protein complex;GO:0044464//cell part;GO:0044424//intracellular part;GO:0044446//intracellular organelle part;GO:0032991//macromolecular complex;GO:0005623//cell;GO:0044430//cyt…	GO:0016787//hydrolase activity;GO:0016462//pyrophosphatase activity;GO:0005488//binding;GO:1901363//heterocyclic compound binding;GO:0001882//nucleoside binding;GO:0016818//hydrolase activity, acting on acid anhydrides, in phosphorus-containing anhydrides;GO:0003774//motor activity;GO:0005515//protein binding;GO:0001883//purine nucleoside binding;GO:0097159//organic cyclic compound binding;GO:001…	GO:1903507//negative regulation of nucleic acid-templated transcription;GO:0043933//macromolecular complex subunit organization;GO:0048513//organ development;GO:0060255//regulation of macromolecule metabolic process;GO:0044707//single-multicellular organism process;GO:0044702//single organism reproductive process;GO:0044710//single-organism metabolic process;GO:0048645//organ formation;GO:0043412…
Unigene0000640	0.5523	1.5127	0.5488	0	2	5	2	0	--	-	-	-	-
Unigene0000641	1.3065	1.7893	1.4606	0	8	10	9	0	--	-	-	-	-
Unigene0000642	1.4656	1.4274	0.9709	0.3547	9	8	6	2	--	-	-	-	-
Unigene0000643	0.7588	0.2771	1.0053	1.1019	3	1	4	4	hypothetical protein VITISV_029474 [Vitis vinifera]	-	-	-	-
Unigene0000644	1.6812	0.5526	0.6682	0.5493	10	3	4	3	--	-	-	-	-
Unigene0000645	3.6292	0.7455	0.6762	0.247	16	3	3	1	PREDICTED: zinc finger BED domain-containing protein RICESLEEPER 2-like [Tarenaya hassleriana]	-	-	GO:0005488//binding	-
Unigene0000646	0	0.588	2.1333	0	0	2	8	0	HSP20.3 [Citrullus lanatus]	ko04141//Protein processing in endoplasmic reticulum//Folding, sorting and degradation//Genetic Information Processing	GO:0043229//intracellular organelle;GO:0044464//cell part;GO:0005783//endoplasmic reticulum;GO:0043226//organelle;GO:0012505//endomembrane system;GO:0005623//cell;GO:0044424//intracellular part;GO:0005622//intracellular;GO:0005737//cytoplasm;GO:0044432//endoplasmic reticulum part;GO:0044422//organelle part;GO:0043231//intracellular membrane-bounded organelle;GO:0044444//cytoplasmic part;GO:004322…	-	GO:0044260//cellular macromolecule metabolic process;GO:1901700//response to oxygen-containing compound;GO:0050896//response to stimulus;GO:0044238//primary metabolic process;GO:0044267//cellular protein metabolic process;GO:0042221//response to chemical;GO:0044237//cellular metabolic process;GO:0009642//response to light intensity;GO:0009628//response to abiotic stimulus;GO:0009987//cellular pro…
Unigene0000647	2.777	1.2677	0	0	12	5	0	0	--	-	-	-	-
Unigene0000648	1.5611	1.4472	0.8353	1.0463	13	11	7	8	--	-	-	-	-
Unigene0000649	1.6101	0	0	1.1691	6	0	0	4	--	-	-	-	-
Unigene0000650	1.5878	1.2426	2.0286	0	7	5	9	0	--	-	-	-	-
Unigene0000651	0.2586	0.5668	1.2851	0	1	2	5	0	--	-	-	-	-
Unigene0000652	0.2722	0.2982	2.1638	2.0752	1	1	8	7	--	-	-	-	-
Unigene0000653	1.8785	0.8821	0	0.2923	7	3	0	1	--	-	-	-	-
Unigene0000654	1.0299	0.2821	1.0234	0.2804	4	1	4	1	--	-	-	-	-
Unigene0000655	0.4298	0.2354	0	0.4681	4	2	0	4	PREDICTED: mitochondrial adenine nucleotide transporter ADNT1, partial [Malus domestica]	-	-	-	-
Unigene0000656	43.7316	41.6436	60.3723	67.6892	1192	1036	1656	1694	PREDICTED: mitochondrial adenine nucleotide transporter ADNT1 [Cucumis melo]	-	GO:0031224//intrinsic component of membrane;GO:0016020//membrane;GO:0044425//membrane part	-	GO:0044763//single-organism cellular process;GO:0044699//single-organism process;GO:0051234//establishment of localization;GO:0051179//localization;GO:0009987//cellular process
Unigene0000657	1.566	0.5719	1.2968	0	6	2	5	0	--	-	-	-	-
Unigene0000658	36.5421	29.2878	33.6276	67.3654	257	188	238	435	--	-	-	-	-
Unigene0000659	0.7488	0.8204	0.9921	0	3	3	4	0	--	-	-	-	-
Unigene0000660	2.4792	0.3018	1.5055	0	18	2	11	0	RING/U-box superfamily protein isoform 1 [Theobroma cacao]	-	GO:0016020//membrane	GO:0043167//ion binding;GO:0043169//cation binding;GO:0005488//binding;GO:0046872//metal ion binding	-
Unigene0000661	1.2372	0	0.9835	0	5	0	4	0	--	-	-	-	-
Unigene0000662	0.4337	0.4752	0.5171	0	5	5	6	0	PREDICTED: heme oxygenase 1, chloroplastic-like [Cucumis melo]	ko00860//Porphyrin and chlorophyll metabolism//Metabolism of cofactors and vitamins//Metabolism	GO:0044424//intracellular part;GO:0043231//intracellular membrane-bounded organelle;GO:0044464//cell part;GO:0005623//cell;GO:0043229//intracellular organelle;GO:0044444//cytoplasmic part;GO:0009536//plastid;GO:0005622//intracellular;GO:0043226//organelle;GO:0043227//membrane-bounded organelle;GO:0005737//cytoplasm	GO:0016491//oxidoreductase activity;GO:0016705//oxidoreductase activity, acting on paired donors, with incorporation or reduction of molecular oxygen;GO:0003824//catalytic activity	GO:0055114//oxidation-reduction process;GO:0044710//single-organism metabolic process;GO:0044699//single-organism process;GO:0008152//metabolic process
Unigene0000663	21.0138	16.5298	17.669	24.99	468	336	396	511	PREDICTED: heme oxygenase 1, chloroplastic-like [Cucumis melo]	ko00860//Porphyrin and chlorophyll metabolism//Metabolism of cofactors and vitamins//Metabolism	GO:0044424//intracellular part;GO:0043227//membrane-bounded organelle;GO:0043226//organelle;GO:0044464//cell part;GO:0044444//cytoplasmic part;GO:0043229//intracellular organelle;GO:0005737//cytoplasm;GO:0005623//cell;GO:0005622//intracellular;GO:0043231//intracellular membrane-bounded organelle;GO:0009536//plastid	GO:0003824//catalytic activity;GO:0016491//oxidoreductase activity;GO:0016705//oxidoreductase activity, acting on paired donors, with incorporation or reduction of molecular oxygen	GO:0044710//single-organism metabolic process;GO:0008152//metabolic process;GO:0044699//single-organism process;GO:0055114//oxidation-reduction process
Unigene0000664	1.6812	0.5263	0.2387	0	7	2	1	0	--	-	-	-	-
Unigene0000665	1.7704	0.5542	1.7593	1.3773	7	2	7	5	--	-	-	-	-
Unigene0000666	0.5104	1.9571	0.5071	0	2	7	2	0	--	-	-	-	-
Unigene0000667	0	2.267	0.514	0.2817	0	8	2	1	--	-	-	-	-
Unigene0000668	1.9583	1.2069	0	0.5332	16	9	0	4	RNA-directed DNA polymerase (Reverse transcriptase) [Medicago truncatula]	-	-	-	-
Unigene0000669	2.2091	0	0.2744	0	8	0	1	0	--	-	-	-	-
Unigene0000670	1.4895	1.224	0	0	8	6	0	0	--	-	-	-	-
Unigene0000671	0.4803	0	2.3865	0	2	0	10	0	--	-	-	-	-
Unigene0000672	1.5345	1.2609	0	0	8	6	0	0	--	-	-	-	-
Unigene0000673	0.2563	0.5617	0.5094	1.1167	1	2	2	4	ty3-gypsy retrotransposon protein [Cucumis melo subsp. melo]	-	GO:0043231//intracellular membrane-bounded organelle;GO:0044464//cell part;GO:0043227//membrane-bounded organelle;GO:0005623//cell;GO:0043234//protein complex;GO:0043229//intracellular organelle;GO:0043226//organelle;GO:0005622//intracellular;GO:0044424//intracellular part;GO:0032991//macromolecular complex	GO:0005488//binding;GO:0003824//catalytic activity;GO:0001076//RNA polymerase II transcription factor binding transcription factor activity;GO:0000989//transcription factor binding transcription factor activity;GO:0097159//organic cyclic compound binding;GO:0016740//transferase activity;GO:0000988//protein binding transcription factor activity	GO:0008152//metabolic process;GO:0006259//DNA metabolic process;GO:1901360//organic cyclic compound metabolic process;GO:0009889//regulation of biosynthetic process;GO:0006807//nitrogen compound metabolic process;GO:0044260//cellular macromolecule metabolic process;GO:0031326//regulation of cellular biosynthetic process;GO:0065007//biological regulation;GO:0043170//macromolecule metabolic process…
Unigene0000674	0.6646	0	0.2202	0	6	0	2	0	PREDICTED: ethylene-responsive transcription factor 6 [Cucumis sativus]	-	-	GO:0097159//organic cyclic compound binding;GO:0001071//nucleic acid binding transcription factor activity;GO:0005488//binding;GO:1901363//heterocyclic compound binding;GO:0003676//nucleic acid binding	GO:0019222//regulation of metabolic process;GO:0060255//regulation of macromolecule metabolic process;GO:0065007//biological regulation;GO:0010468//regulation of gene expression;GO:0050789//regulation of biological process
Unigene0000675	13.7952	9.5492	6.7479	8.7355	258	163	127	150	PREDICTED: ethylene-responsive transcription factor 5 [Cucumis melo]	-	-	GO:1901363//heterocyclic compound binding;GO:0005488//binding;GO:0001071//nucleic acid binding transcription factor activity;GO:0003676//nucleic acid binding;GO:0097159//organic cyclic compound binding	GO:0050789//regulation of biological process;GO:0019222//regulation of metabolic process;GO:0060255//regulation of macromolecule metabolic process;GO:0065007//biological regulation;GO:0010468//regulation of gene expression
Unigene0000676	0.4803	0	1.6706	0	2	0	7	0	--	-	-	-	-
Unigene0000677	0.5149	0	0.5117	1.1217	2	0	2	4	--	-	-	-	-
Unigene0000678	2.4638	4.589	4.5701	4.2934	30	51	56	48	PREDICTED: dentin sialophosphoprotein-like [Pyrus x bretschneideri]	-	-	-	-
Unigene0000679	1.4172	0	0	0.2573	6	0	0	1	--	-	-	-	-
Unigene0000680	0.9813	0	0.7313	0	4	0	3	0	--	-	-	-	-
Unigene0000681	0	0	1.8073	0	0	0	7	0	PREDICTED: beta-galactosidase 5 [Cucumis sativus]	-	GO:0005576//extracellular region	GO:0005488//binding;GO:0016798//hydrolase activity, acting on glycosyl bonds;GO:0015925//galactosidase activity;GO:0004553//hydrolase activity, hydrolyzing O-glycosyl compounds;GO:0003824//catalytic activity;GO:0016787//hydrolase activity	GO:0071554//cell wall organization or biogenesis;GO:0016043//cellular component organization;GO:0006595//polyamine metabolic process;GO:0008152//metabolic process;GO:0009308//amine metabolic process;GO:0051239//regulation of multicellular organismal process;GO:2000026//regulation of multicellular organismal development;GO:0045229//external encapsulating structure organization;GO:0006576//cellular…
Unigene0000682	1.3178	0.9024	0	0.3588	8	5	0	2	--	-	-	-	-
Unigene0000683	0.4573	0.835	2.5749	0	3	5	17	0	--	-	-	-	-
Unigene0000684	0.6725	1.7191	0	0	3	7	0	0	--	-	-	-	-
Unigene0000685	3.1208	1.4397	3.5908	1.4311	19	8	22	8	--	-	-	-	-
Unigene0000686	1.1908	1.0438	0	0	5	4	0	0	--	-	-	-	-
Unigene0000687	6.2372	4.7939	4.9029	2.1292	134	94	106	42	PREDICTED: probable membrane-associated kinase regulator 1 [Cucumis melo]	-	GO:0016020//membrane	-	GO:0008152//metabolic process;GO:0010033//response to organic substance;GO:0044699//single-organism process;GO:0050896//response to stimulus;GO:0009725//response to hormone;GO:0050794//regulation of cellular process;GO:0009719//response to endogenous stimulus;GO:0033993//response to lipid;GO:0065007//biological regulation;GO:0014070//response to organic cyclic compound;GO:0050789//regulation of b…
Unigene0000688	0	0	0	0	0	0	0	0	PREDICTED: probable membrane-associated kinase regulator 1 [Cucumis melo]	-	-	-	-
Unigene0000689	4.501	2.8921	4.2709	3.9808	133	78	127	108	PREDICTED: probable peptide transporter At1g52190-like isoform X3 [Solanum tuberosum]	-	-	-	-
Unigene0000690	0.1193	0.523	0.1186	0	1	4	1	0	PREDICTED: protein NRT1/ PTR FAMILY 1.1-like [Beta vulgaris subsp. vulgaris]	-	-	GO:0008509//anion transmembrane transporter activity;GO:0022857//transmembrane transporter activity;GO:0022891//substrate-specific transmembrane transporter activity;GO:0005215//transporter activity;GO:0015075//ion transmembrane transporter activity;GO:0015103//inorganic anion transmembrane transporter activity;GO:0022892//substrate-specific transporter activity	GO:0044765//single-organism transport;GO:0006807//nitrogen compound metabolic process;GO:0044281//small molecule metabolic process;GO:0009653//anatomical structure morphogenesis;GO:0044237//cellular metabolic process;GO:0006820//anion transport;GO:0051234//establishment of localization;GO:0015698//inorganic anion transport;GO:0006811//ion transport;GO:0048856//anatomical structure development;GO:…
Unigene0000691	0.64	1.2111	0.2602	0.5069	22	38	9	16	PREDICTED: BES1/BZR1 homolog protein 4 [Cucumis sativus]	-	-	-	GO:0010468//regulation of gene expression;GO:0065007//biological regulation;GO:0019222//regulation of metabolic process;GO:0050789//regulation of biological process;GO:0060255//regulation of macromolecule metabolic process
Unigene0000692	0	0	0	0	0	0	0	0	PREDICTED: BES1/BZR1 homolog protein 4 [Cucumis sativus]	-	-	-	GO:0060255//regulation of macromolecule metabolic process;GO:0050789//regulation of biological process;GO:0019222//regulation of metabolic process;GO:0065007//biological regulation;GO:0010468//regulation of gene expression
Unigene0000693	0	1.4187	1.2867	1.2088	0	7	7	6	PREDICTED: CASP-like protein POPTRDRAFT_823430 [Cucumis melo]	-	GO:0016020//membrane	-	-
Unigene0000694	0	0.9054	2.1899	0.3	0	6	16	2	PREDICTED: CASP-like protein 1F2 [Cucumis sativus]	-	GO:0016020//membrane;GO:0044425//membrane part;GO:0031224//intrinsic component of membrane	-	-
Unigene0000695	0.5342	4.8286	0.3981	0.4364	4	33	3	3	PREDICTED: transcription factor bHLH13-like [Populus euphratica]	-	-	GO:0005488//binding;GO:0005515//protein binding	GO:0043170//macromolecule metabolic process;GO:0044260//cellular macromolecule metabolic process;GO:0009987//cellular process;GO:0009058//biosynthetic process;GO:1901576//organic substance biosynthetic process;GO:0044249//cellular biosynthetic process;GO:0009059//macromolecule biosynthetic process;GO:0044237//cellular metabolic process;GO:0008152//metabolic process;GO:0010467//gene expression;GO:…
Unigene0000696	0.6907	0.1892	1.0296	0.3762	4	1	6	2	--	-	-	-	-
Unigene0000697	0.5444	1.4911	0.2705	0.2965	2	5	1	1	PREDICTED: probable disease resistance protein At4g27220 isoform X1 [Cucumis melo]	-	-	GO:0097367//carbohydrate derivative binding;GO:0036094//small molecule binding;GO:0032549//ribonucleoside binding;GO:0097159//organic cyclic compound binding;GO:0032550//purine ribonucleoside binding;GO:0001883//purine nucleoside binding;GO:0005488//binding;GO:0001882//nucleoside binding;GO:1901363//heterocyclic compound binding	-
Unigene0000698	0.8244	1.5054	0	0.8979	3	5	0	3	PREDICTED: probable disease resistance protein At4g27220 isoform X1 [Cucumis melo]	-	-	GO:0036094//small molecule binding;GO:0032550//purine ribonucleoside binding;GO:0032549//ribonucleoside binding;GO:0005488//binding;GO:1901363//heterocyclic compound binding;GO:0001883//purine nucleoside binding;GO:0097159//organic cyclic compound binding;GO:0097367//carbohydrate derivative binding;GO:0001882//nucleoside binding	-
Unigene0000699	1.9413	0.709	0.8574	0	9	3	4	0	--	-	-	-	-
Unigene0000700	3.0404	0.2221	0.4028	0.4415	15	1	2	2	--	-	-	-	-
Unigene0000701	1.5518	0	0	0.5634	6	0	0	2	--	-	-	-	-
Unigene0000702	0	1.234	1.399	1.38	0	8	10	9	--	-	-	-	-
Unigene0000703	0.937	0.1467	0.3991	1.1664	14	2	6	16	PREDICTED: metal tolerance protein B [Cucumis melo]	-	GO:0044425//membrane part;GO:0005622//intracellular;GO:0043229//intracellular organelle;GO:0043227//membrane-bounded organelle;GO:0005623//cell;GO:0044464//cell part;GO:0044424//intracellular part;GO:0031224//intrinsic component of membrane;GO:0016020//membrane;GO:0043231//intracellular membrane-bounded organelle;GO:0043226//organelle	GO:0022892//substrate-specific transporter activity;GO:0022857//transmembrane transporter activity;GO:0015075//ion transmembrane transporter activity;GO:0005215//transporter activity;GO:0022891//substrate-specific transmembrane transporter activity	GO:0009987//cellular process;GO:0051234//establishment of localization;GO:0016043//cellular component organization;GO:0044765//single-organism transport;GO:0006810//transport;GO:0044699//single-organism process;GO:0044763//single-organism cellular process;GO:0051179//localization;GO:0006812//cation transport;GO:0071840//cellular component organization or biogenesis;GO:0006811//ion transport;GO:19…
Unigene0000704	14.6931	10.9115	10.5933	14.0551	419	284	304	368	PREDICTED: metal tolerance protein B [Cucumis melo]	-	GO:0043231//intracellular membrane-bounded organelle;GO:0016020//membrane;GO:0044425//membrane part;GO:0005622//intracellular;GO:0043226//organelle;GO:0043227//membrane-bounded organelle;GO:0044464//cell part;GO:0044424//intracellular part;GO:0031224//intrinsic component of membrane;GO:0005623//cell;GO:0043229//intracellular organelle	GO:0005215//transporter activity;GO:0022892//substrate-specific transporter activity;GO:0015075//ion transmembrane transporter activity;GO:0022857//transmembrane transporter activity;GO:0022891//substrate-specific transmembrane transporter activity	GO:0016043//cellular component organization;GO:0044765//single-organism transport;GO:0006811//ion transport;GO:0044763//single-organism cellular process;GO:1902578//single-organism localization;GO:0044699//single-organism process;GO:0006812//cation transport;GO:0051234//establishment of localization;GO:0009987//cellular process;GO:0006810//transport;GO:0071840//cellular component organization or …
Unigene0000705	0.2273	0.498	0.3388	0.6188	2	4	3	5	PREDICTED: mitochondrial-processing peptidase subunit alpha [Cucumis sativus]	-	-	GO:0003824//catalytic activity;GO:0016787//hydrolase activity;GO:0043169//cation binding;GO:0005488//binding;GO:0004175//endopeptidase activity;GO:0070011//peptidase activity, acting on L-amino acid peptides;GO:0043167//ion binding;GO:0008233//peptidase activity	GO:0071704//organic substance metabolic process;GO:0043170//macromolecule metabolic process;GO:0019538//protein metabolic process;GO:0044238//primary metabolic process;GO:0008152//metabolic process
Unigene0000706	11.7403	15.76	18.8602	24.2369	373	457	603	707	PREDICTED: mitochondrial-processing peptidase subunit alpha-like [Cucumis melo]	-	-	GO:0043167//ion binding;GO:0004175//endopeptidase activity;GO:0005488//binding;GO:0003824//catalytic activity;GO:0043169//cation binding;GO:0070011//peptidase activity, acting on L-amino acid peptides;GO:0016787//hydrolase activity;GO:0008233//peptidase activity	GO:0043170//macromolecule metabolic process;GO:0044238//primary metabolic process;GO:0008152//metabolic process;GO:0071704//organic substance metabolic process;GO:0019538//protein metabolic process
Unigene0000707	0.3104	0.1701	0.1157	0.1691	8	4	3	4	PREDICTED: mitochondrial-processing peptidase subunit alpha-like [Cucumis melo]	-	-	GO:0043169//cation binding;GO:0008233//peptidase activity;GO:0016787//hydrolase activity;GO:0005488//binding;GO:0070011//peptidase activity, acting on L-amino acid peptides;GO:0004175//endopeptidase activity;GO:0003824//catalytic activity;GO:0043167//ion binding	GO:0019538//protein metabolic process;GO:0071704//organic substance metabolic process;GO:0043170//macromolecule metabolic process;GO:0044238//primary metabolic process;GO:0008152//metabolic process
Unigene0000708	0	3.2428	0.1838	0.6044	0	16	1	3	--	-	-	-	-
Unigene0000709	0.8284	2.0422	2.058	0.6767	4	9	10	3	PREDICTED: 17.6 kDa class I heat shock protein 3-like [Cucumis melo]	ko04141//Protein processing in endoplasmic reticulum//Folding, sorting and degradation//Genetic Information Processing	GO:0043231//intracellular membrane-bounded organelle;GO:0043229//intracellular organelle;GO:0005623//cell;GO:0043227//membrane-bounded organelle;GO:0044464//cell part;GO:0043226//organelle;GO:0044424//intracellular part;GO:0005622//intracellular	-	GO:0050896//response to stimulus;GO:1901700//response to oxygen-containing compound;GO:0006950//response to stress;GO:0006979//response to oxidative stress;GO:0010038//response to metal ion;GO:0097305//response to alcohol;GO:0000302//response to reactive oxygen species;GO:0010033//response to organic substance;GO:0010035//response to inorganic substance;GO:0042221//response to chemical
Unigene0000710	0.8595	1.4126	3.63	0.234	4	6	17	1	--	-	-	-	-
Unigene0000711	2.4972	0.304	0.2757	0	9	1	1	0	--	-	-	-	-
Unigene0000712	2.1502	0.7853	2.4928	0	12	4	14	0	--	-	-	-	-
Unigene0000713	2.2864	0.501	0.4544	0	10	2	2	0	--	-	-	-	-
Unigene0000714	0.4906	0.8063	0.9751	2.6719	2	3	4	10	--	-	-	-	-
Unigene0000715	2.2328	0.2446	0.6656	0.4864	10	1	3	2	--	-	-	-	-
Unigene0000716	3.2112	0.4222	1.0211	0.2798	25	3	8	2	--	-	-	-	-
Unigene0000717	0.9244	0.6752	0.6124	0.1678	6	4	4	1	--	-	-	-	-
Unigene0000718	3.2747	0.8154	0.4437	0.3242	22	5	3	2	--	-	-	-	-
Unigene0000719	0.2646	0	0.7889	1.4411	1	0	3	5	PREDICTED: uncharacterized protein LOC101214079 isoform X2 [Cucumis sativus]	-	-	-	-
Unigene0000720	1.0393	0.5693	0.5164	0.566	4	2	2	2	--	-	-	-	-
Unigene0000721	0.8205	0.5993	0.2718	0.2979	3	2	1	1	--	-	-	-	-
Unigene0000722	1.2426	0.8169	0	0.812	5	3	0	3	--	-	-	-	-
Unigene0000723	1.8438	1.2432	3.9464	2.9351	13	8	28	19	--	-	-	-	-
Unigene0000724	0	0.2317	0.2102	0.1152	0	4	4	2	protein plastid transcriptionally active 5 [Arabidopsis thaliana]	-	-	GO:0005488//binding;GO:0005515//protein binding	-
Unigene0000725	0	0.1674	0.3037	0.2219	0	3	6	4	protein plastid transcriptionally active 5 [Arabidopsis thaliana]	-	-	GO:0005515//protein binding;GO:0005488//binding	-
Unigene0000726	2.7574	2.5806	2.6259	0.3754	48	41	46	6	--	-	-	-	-
Unigene0000727	1.8074	0.7426	0.898	0.2461	8	3	4	1	--	-	-	-	-
Unigene0000728	0.9607	0.5263	0.9546	2.3542	4	2	4	9	PREDICTED: uncharacterized protein LOC103490087 [Cucumis melo]	-	-	GO:0005488//binding	-
Unigene0000729	3.4008	2.1194	4.4956	2.5147	109	62	145	74	PREDICTED: pentatricopeptide repeat-containing protein At5g39980, chloroplastic [Cucumis melo]	-	GO:0044464//cell part;GO:0005623//cell;GO:0043227//membrane-bounded organelle;GO:0044444//cytoplasmic part;GO:0043231//intracellular membrane-bounded organelle;GO:0043229//intracellular organelle;GO:0005737//cytoplasm;GO:0009536//plastid;GO:0044424//intracellular part;GO:0043226//organelle;GO:0005622//intracellular	-	-
Unigene0000730	0.9012	1.6926	2.8144	2.6641	7	12	22	19	PREDICTED: pentatricopeptide repeat-containing protein At5g39980, chloroplastic [Cucumis melo]	-	-	-	-
Unigene0000731	1.1171	0.816	0.555	1.4195	6	4	3	7	--	-	-	-	-
Unigene0000732	0	0	0	0	0	0	0	0	BnaA05g37210D [Brassica napus]	-	-	-	-
Unigene0000733	5.2601	0.3842	4.7914	6.4928	60	4	55	68	BnaA05g37210D [Brassica napus]	-	-	-	-
Unigene0000734	6.0417	3.569	5.312	4.4273	217	117	192	146	PREDICTED: heat shock 70 kDa protein 8 [Cucumis sativus]	-	-	GO:0005488//binding;GO:0032549//ribonucleoside binding;GO:0001883//purine nucleoside binding;GO:0097367//carbohydrate derivative binding;GO:0097159//organic cyclic compound binding;GO:0032550//purine ribonucleoside binding;GO:0001882//nucleoside binding;GO:0036094//small molecule binding;GO:1901363//heterocyclic compound binding	GO:0008152//metabolic process;GO:0044260//cellular macromolecule metabolic process;GO:0044238//primary metabolic process;GO:0043170//macromolecule metabolic process;GO:0044237//cellular metabolic process;GO:0019538//protein metabolic process;GO:0006950//response to stress;GO:0050896//response to stimulus;GO:0009266//response to temperature stimulus;GO:0071704//organic substance metabolic process;…
Unigene0000735	0	0	0	0	0	0	0	0	PREDICTED: LOB domain-containing protein 4-like [Cucumis melo]	-	GO:0044464//cell part;GO:0044424//intracellular part;GO:0005622//intracellular;GO:0043231//intracellular membrane-bounded organelle;GO:0043227//membrane-bounded organelle;GO:0043226//organelle;GO:0043229//intracellular organelle;GO:0005623//cell	-	GO:0050789//regulation of biological process;GO:0009987//cellular process;GO:0044237//cellular metabolic process;GO:0009799//specification of symmetry;GO:0007275//multicellular organismal development;GO:0010087//phloem or xylem histogenesis;GO:0048507//meristem development;GO:0048532//anatomical structure arrangement;GO:0009653//anatomical structure morphogenesis;GO:0051239//regulation of multice…
Unigene0000736	0.6451	0.7068	0.2564	0	5	5	2	0	PREDICTED: LOB domain-containing protein 4-like [Cucumis melo]	-	GO:0005623//cell;GO:0005622//intracellular;GO:0044464//cell part;GO:0044424//intracellular part;GO:0043231//intracellular membrane-bounded organelle;GO:0043229//intracellular organelle;GO:0043227//membrane-bounded organelle;GO:0043226//organelle	-	GO:0007275//multicellular organismal development;GO:0009799//specification of symmetry;GO:0044707//single-multicellular organism process;GO:0044260//cellular macromolecule metabolic process;GO:0044237//cellular metabolic process;GO:0032501//multicellular organismal process;GO:0051239//regulation of multicellular organismal process;GO:0009933//meristem structural organization;GO:0050793//regulatio…
Unigene0000737	2.2342	0.612	2.0352	0	12	3	11	0	--	-	-	-	-
Unigene0000738	2.8801	1.9419	0.9907	1.6891	26	16	9	14	--	-	-	-	-
Unigene0000739	1.0992	0	0.5461	1.5963	6	0	3	8	--	-	-	-	-
Unigene0000740	1.2261	0.5532	0.5734	1.414	34	14	16	36	PREDICTED: probable rhamnogalacturonate lyase B [Cucumis melo]	-	-	GO:0005488//binding;GO:0003824//catalytic activity	GO:0044238//primary metabolic process;GO:0008152//metabolic process
Unigene0000741	0	0	0.0898	0	0	0	2	0	PREDICTED: probable rhamnogalacturonate lyase B [Cucumis melo]	-	-	GO:0003824//catalytic activity;GO:0005488//binding	GO:0008152//metabolic process;GO:0044238//primary metabolic process
Unigene0000742	1.5518	1.4169	0	1.1268	6	5	0	4	Vacuolar ATP synthase catalytic subunit-related / V-ATPase-related / vacuolar proton pump-related [Theobroma cacao]	-	-	-	-
Unigene0000743	2.9623	3.6882	2.074	5.4995	44	50	31	75	PREDICTED: small heat shock protein, chloroplastic [Cucumis melo]	ko04141//Protein processing in endoplasmic reticulum//Folding, sorting and degradation//Genetic Information Processing	-	-	-
Unigene0000744	3.2307	1.0891	0.247	0	13	4	1	0	--	-	-	-	-
Unigene0000745	2.9519	0.6615	1.3333	0.3653	44	9	20	5	--	-	-	-	-
Unigene0000746	1.0318	0.6783	0.4101	1.5732	5	3	2	7	--	-	-	-	-
Unigene0000747	0	0	1.9024	0.2979	0	0	7	1	--	-	-	-	-
Unigene0000748	1.638	0.4723	2.7415	2.2536	19	5	32	24	Stress responsive A/B Barrel Domain [Theobroma cacao]	-	GO:0009536//plastid;GO:0044424//intracellular part;GO:0005737//cytoplasm;GO:0043229//intracellular organelle;GO:0044464//cell part;GO:0044444//cytoplasmic part;GO:0043226//organelle;GO:0043231//intracellular membrane-bounded organelle;GO:0005622//intracellular;GO:0043227//membrane-bounded organelle;GO:0005623//cell	GO:0005488//binding;GO:0043167//ion binding;GO:0043169//cation binding	-
Unigene0000749	1.1626	0.8492	0.3851	1.0552	6	4	2	5	--	-	-	-	-
Unigene0000750	2.8227	0.4639	0.7012	0.9223	20	3	5	6	--	-	-	-	-
Unigene0000751	0	0.8698	1.5778	0	0	3	6	0	--	-	-	-	-
Unigene0000752	0.6191	0.4522	0.2051	1.1237	3	2	1	5	PREDICTED: DELLA protein GAI-like [Cucumis sativus]	-	-	-	GO:0009987//cellular process;GO:1901576//organic substance biosynthetic process;GO:0044237//cellular metabolic process;GO:0034645//cellular macromolecule biosynthetic process;GO:0044249//cellular biosynthetic process;GO:0010468//regulation of gene expression;GO:0060255//regulation of macromolecule metabolic process;GO:0008152//metabolic process;GO:0019222//regulation of metabolic process;GO:00717…
Unigene0000753	5.1752	2.0311	0.307	1.8508	67	24	4	22	--	-	-	-	-
Unigene0000754	1.4039	0.879	0.3986	0	7	4	2	0	Ty3/gypsy retrotransposon protein [Beta vulgaris subsp. vulgaris]	-	-	-	GO:0044237//cellular metabolic process;GO:0046483//heterocycle metabolic process;GO:0032774//RNA biosynthetic process;GO:0016070//RNA metabolic process;GO:0009058//biosynthetic process;GO:0006139//nucleobase-containing compound metabolic process;GO:1901360//organic cyclic compound metabolic process;GO:0044249//cellular biosynthetic process;GO:0008152//metabolic process;GO:1901576//organic substan…
Unigene0000755	0.4347	1.1906	0.6479	0	2	5	3	0	Transposon Ty3-I Gag-Pol polyprotein [Morus notabilis]	-	GO:0043229//intracellular organelle;GO:0043227//membrane-bounded organelle;GO:0043226//organelle;GO:0044425//membrane part;GO:0016020//membrane;GO:0044424//intracellular part;GO:0005622//intracellular;GO:0005623//cell;GO:0031224//intrinsic component of membrane;GO:0044464//cell part;GO:0043231//intracellular membrane-bounded organelle	GO:0005215//transporter activity;GO:0005488//binding;GO:0003824//catalytic activity;GO:0097159//organic cyclic compound binding	GO:0006139//nucleobase-containing compound metabolic process;GO:0043170//macromolecule metabolic process;GO:0046483//heterocycle metabolic process;GO:0044699//single-organism process;GO:0006725//cellular aromatic compound metabolic process;GO:1901360//organic cyclic compound metabolic process;GO:0090304//nucleic acid metabolic process;GO:0034641//cellular nitrogen compound metabolic process;GO:00…
Unigene0000756	1.6273	1.7829	0	0.8862	8	8	0	4	--	-	-	-	-
Unigene0000757	2.412	1.5979	1.3378	3.4213	43	26	24	56	PREDICTED: vitellogenin-2-like [Glycine max]	-	-	-	-
Unigene0000758	0.7805	0.2631	0.2983	0.3924	13	4	5	6	PREDICTED: vitellogenin-2-like [Glycine max]	-	-	-	-
Unigene0000759	0	0	0	0	0	0	0	0	PREDICTED: pentatricopeptide repeat-containing protein At2g36730 isoform X2 [Cucumis sativus]	-	-	GO:0001883//purine nucleoside binding;GO:0016817//hydrolase activity, acting on acid anhydrides;GO:0016787//hydrolase activity;GO:0003824//catalytic activity;GO:0017111//nucleoside-triphosphatase activity;GO:0097367//carbohydrate derivative binding;GO:0032549//ribonucleoside binding;GO:0032550//purine ribonucleoside binding;GO:0016462//pyrophosphatase activity;GO:0016887//ATPase activity;GO:00168…	GO:0044699//single-organism process;GO:0008152//metabolic process;GO:0044238//primary metabolic process;GO:0044763//single-organism cellular process;GO:0071704//organic substance metabolic process;GO:0043170//macromolecule metabolic process;GO:0009987//cellular process;GO:0019538//protein metabolic process
Unigene0000760	3.8948	4.5439	3.7627	3.4171	108	115	105	87	PREDICTED: pentatricopeptide repeat-containing protein At2g36730 isoform X1 [Cucumis sativus]	-	-	GO:0036094//small molecule binding;GO:0001882//nucleoside binding;GO:0016887//ATPase activity;GO:0016817//hydrolase activity, acting on acid anhydrides;GO:0070011//peptidase activity, acting on L-amino acid peptides;GO:0004175//endopeptidase activity;GO:0017111//nucleoside-triphosphatase activity;GO:0016787//hydrolase activity;GO:0008233//peptidase activity;GO:0097159//organic cyclic compound bin…	GO:0044763//single-organism cellular process;GO:0044699//single-organism process;GO:0044238//primary metabolic process;GO:0008152//metabolic process;GO:0009987//cellular process;GO:0043170//macromolecule metabolic process;GO:0019538//protein metabolic process;GO:0071704//organic substance metabolic process
Unigene0000761	0.9771	1.6058	0.2427	0.266	4	6	1	1	--	-	-	-	-
Unigene0000762	1.8182	3.3616	1.1292	1.2377	16	27	10	10	--	-	-	-	-
Unigene0000763	5.9541	0.4349	3.1555	0	30	2	16	0	PREDICTED: disease resistance protein RGA2-like [Cucumis sativus]	-	-	GO:0032550//purine ribonucleoside binding;GO:0005488//binding;GO:0036094//small molecule binding;GO:0001883//purine nucleoside binding;GO:1901363//heterocyclic compound binding;GO:0032549//ribonucleoside binding;GO:0097159//organic cyclic compound binding;GO:0097367//carbohydrate derivative binding;GO:0001882//nucleoside binding	-
Unigene0000764	0.7035	0.7708	1.7477	1.3409	4	4	10	7	PREDICTED: pentatricopeptide repeat-containing protein At3g49170, chloroplastic [Cucumis sativus]	-	GO:0005623//cell;GO:0044464//cell part;GO:0043227//membrane-bounded organelle;GO:0009536//plastid;GO:0043229//intracellular organelle;GO:0005622//intracellular;GO:0043231//intracellular membrane-bounded organelle;GO:0005737//cytoplasm;GO:0044424//intracellular part;GO:0043226//organelle;GO:0044444//cytoplasmic part	GO:0016462//pyrophosphatase activity;GO:0016887//ATPase activity;GO:0016817//hydrolase activity, acting on acid anhydrides;GO:0016787//hydrolase activity;GO:0017111//nucleoside-triphosphatase activity;GO:0003824//catalytic activity;GO:0042623//ATPase activity, coupled;GO:0016818//hydrolase activity, acting on acid anhydrides, in phosphorus-containing anhydrides	GO:0003006//developmental process involved in reproduction;GO:0032502//developmental process;GO:0022414//reproductive process
Unigene0000765	1.8038	2.9645	1.0083	0.3684	16	24	9	3	--	-	-	-	-
Unigene0000766	0	0	0	0	0	0	0	0	--	-	-	-	-
Unigene0000767	15.1559	8.445	8.6921	6.6028	175	89	101	70	Os11g0496500 [Oryza sativa Japonica Group]	-	-	-	-
Unigene0000768	1.2205	2.6744	0.4043	0.4431	6	12	2	2	PREDICTED: aspartic proteinase Asp1-like [Cucumis melo]	-	-	GO:0004175//endopeptidase activity;GO:0003824//catalytic activity;GO:0016787//hydrolase activity;GO:0070011//peptidase activity, acting on L-amino acid peptides;GO:0008233//peptidase activity	GO:0043170//macromolecule metabolic process;GO:0019538//protein metabolic process;GO:0008152//metabolic process;GO:0071704//organic substance metabolic process;GO:0044238//primary metabolic process
Unigene0000769	2.0056	1.0987	0.3986	0	10	5	2	0	--	-	-	-	-
Unigene0000770	0	0	0	0	0	0	0	0	--	-	-	-	-
Unigene0000771	1.7761	0.2654	0	0.3517	22	3	0	4	--	-	-	-	-
Unigene0000772	0.2696	0.5908	1.3396	0	1	2	5	0	gag/pol protein [Bryonia dioica]	-	-	GO:0097159//organic cyclic compound binding;GO:1901363//heterocyclic compound binding;GO:0016787//hydrolase activity;GO:0005488//binding;GO:0003676//nucleic acid binding;GO:0046914//transition metal ion binding;GO:0003824//catalytic activity;GO:0046872//metal ion binding;GO:0043167//ion binding;GO:0043169//cation binding	GO:0043170//macromolecule metabolic process;GO:0044238//primary metabolic process;GO:0071704//organic substance metabolic process;GO:0034641//cellular nitrogen compound metabolic process;GO:1901360//organic cyclic compound metabolic process;GO:0046483//heterocycle metabolic process;GO:0009987//cellular process;GO:0006807//nitrogen compound metabolic process;GO:0006725//cellular aromatic compound …
Unigene0000773	3.8551	2.6805	1.2524	1.9379	52	33	17	24	PREDICTED: polyol transporter 5-like [Jatropha curcas]	-	GO:0031224//intrinsic component of membrane;GO:0044425//membrane part;GO:0016020//membrane	GO:0016491//oxidoreductase activity;GO:0016628//oxidoreductase activity, acting on the CH-CH group of donors, NAD or NADP as acceptor;GO:0022857//transmembrane transporter activity;GO:0003824//catalytic activity;GO:0005215//transporter activity;GO:0016627//oxidoreductase activity, acting on the CH-CH group of donors	GO:0051179//localization;GO:0044710//single-organism metabolic process;GO:0009987//cellular process;GO:1902578//single-organism localization;GO:0051234//establishment of localization;GO:0008152//metabolic process;GO:0044699//single-organism process;GO:0044763//single-organism cellular process;GO:0006810//transport;GO:0044765//single-organism transport
Unigene0000774	2.0348	0.2027	1.4705	0.8059	11	1	8	4	PREDICTED: polyol transporter 5-like [Jatropha curcas]	-	GO:0031224//intrinsic component of membrane;GO:0044425//membrane part;GO:0016020//membrane	GO:0005215//transporter activity;GO:0022857//transmembrane transporter activity	GO:0044763//single-organism cellular process;GO:0051234//establishment of localization;GO:0051179//localization;GO:0009987//cellular process;GO:0044699//single-organism process
Unigene0000775	0	0.649	2.5015	0	0	4	17	0	BnaC02g47840D [Brassica napus]	-	GO:0044425//membrane part;GO:0031224//intrinsic component of membrane;GO:0016020//membrane	GO:0003676//nucleic acid binding;GO:0097159//organic cyclic compound binding;GO:0005488//binding;GO:1901363//heterocyclic compound binding;GO:0005515//protein binding	-
Unigene0000776	4.3863	0	1.7707	0	32	0	13	0	--	-	-	-	-
Unigene0000777	0	0	0	0	0	0	0	0	--	-	-	-	-
Unigene0000778	0	0	0	0	0	0	0	0	--	-	-	-	-
Unigene0000779	2.3383	0.854	0.2582	0	9	3	1	0	MuDRA-like transposase [Cucumis melo]	-	-	GO:0005488//binding	-
Unigene0000780	3.3314	1.1526	0.6969	0.3819	19	6	4	2	--	-	-	-	-
Unigene0000781	15.8064	8.5655	9.127	11.0737	370	183	215	238	DPP6 N-terminal domain-like protein [Theobroma cacao]	-	-	-	-
Unigene0000782	0.0583	0.0639	0.1159	0.0635	1	1	2	1	DPP6 N-terminal domain-like protein [Theobroma cacao]	-	GO:0031090//organelle membrane;GO:0005622//intracellular;GO:0005618//cell wall;GO:0030312//external encapsulating structure;GO:0043229//intracellular organelle;GO:0043227//membrane-bounded organelle;GO:0044424//intracellular part;GO:0005623//cell;GO:0043231//intracellular membrane-bounded organelle;GO:0044464//cell part;GO:0044422//organelle part;GO:0043226//organelle;GO:0071944//cell periphery;G…	-	GO:0019752//carboxylic acid metabolic process;GO:0043436//oxoacid metabolic process;GO:0006089//lactate metabolic process;GO:0044710//single-organism metabolic process;GO:0044763//single-organism cellular process;GO:0071704//organic substance metabolic process;GO:0044699//single-organism process;GO:0006082//organic acid metabolic process;GO:0044281//small molecule metabolic process;GO:0032787//mo…
Unigene0000783	0.2203	0	0	0	4	0	0	0	DPP6 N-terminal domain-like protein [Theobroma cacao]	-	GO:0044422//organelle part;GO:0005622//intracellular;GO:0044424//intracellular part;GO:0043229//intracellular organelle;GO:0043227//membrane-bounded organelle;GO:0005618//cell wall;GO:0043226//organelle;GO:0030312//external encapsulating structure;GO:0043231//intracellular membrane-bounded organelle;GO:0031090//organelle membrane;GO:0005623//cell;GO:0071944//cell periphery;GO:0044464//cell part;G…	-	GO:0009987//cellular process;GO:1901615//organic hydroxy compound metabolic process;GO:0044699//single-organism process;GO:0071704//organic substance metabolic process;GO:0043436//oxoacid metabolic process;GO:0044763//single-organism cellular process;GO:0044281//small molecule metabolic process;GO:0044710//single-organism metabolic process;GO:0006089//lactate metabolic process;GO:0032787//monocar…
Unigene0000784	16.5643	21.995	22.7984	25.5805	335	406	464	475	PREDICTED: probable serine/threonine-protein kinase DDB_G0291350 isoform X1 [Gossypium raimondii]	-	-	-	-
Unigene0000785	0.2735	0	1.4947	1.3404	2	0	11	9	--	-	-	-	-
Unigene0000786	1.3674	1.4982	0.5435	0	5	5	2	0	--	-	-	-	-
Unigene0000787	0	0.7637	0.4618	1.2653	0	3	2	5	--	-	-	-	-
Unigene0000788	173.017	90.0382	100.499	13.3104	1798	854	1051	127	22.0 kDa heat shock protein [Medicago truncatula]	-	-	-	GO:0050896//response to stimulus
Unigene0000789	2.001	2.9369	1.5757	0.9869	53	71	42	24	PREDICTED: LOW QUALITY PROTEIN: probable GPI-anchored adhesin-like protein PGA55 [Cucumis melo]	-	-	-	-
Unigene0000790	2.2209	0.7684	0.8131	0.1273	19	6	7	1	--	-	-	-	-
Unigene0000791	0.5532	1.1111	1.8322	1.4058	6	11	20	14	PREDICTED: pentatricopeptide repeat-containing protein At1g11290-like [Cucumis sativus]	-	-	-	-
Unigene0000792	0.2809	0	0.8373	0	2	0	6	0	Homer protein isoform 2 [Theobroma cacao]	-	-	-	-
Unigene0000793	0.0514	0	0	0	1	0	0	0	Homer protein isoform 2 [Theobroma cacao]	-	-	-	-
Unigene0000794	0	0	0	0	0	0	0	0	Homer protein isoform 2 [Theobroma cacao]	-	-	-	-
Unigene0000795	2.5348	0.2777	0	0.5521	20	2	0	4	--	-	-	-	-
Unigene0000796	1.5324	0.1679	2.2842	1.3352	10	1	15	8	--	-	-	-	-
Unigene0000797	0.4054	2.4429	1.6113	0.883	2	11	8	4	--	-	-	-	-
Unigene0000798	31.9004	18.4498	19.3316	16.8026	610	322	372	295	red chlorophyll catabolite reductase [Citrullus lanatus subsp. vulgaris]	ko00860//Porphyrin and chlorophyll metabolism//Metabolism of cofactors and vitamins//Metabolism	GO:0044422//organelle part;GO:0044446//intracellular organelle part;GO:0044464//cell part;GO:0005622//intracellular;GO:0043231//intracellular membrane-bounded organelle;GO:0005623//cell;GO:0031967//organelle envelope;GO:0044424//intracellular part;GO:0043226//organelle;GO:0044444//cytoplasmic part;GO:0044435//plastid part;GO:0005737//cytoplasm;GO:0043229//intracellular organelle;GO:0031975//envel…	GO:0003824//catalytic activity;GO:0043169//cation binding;GO:0043167//ion binding;GO:0016636//oxidoreductase activity, acting on the CH-CH group of donors, iron-sulfur protein as acceptor;GO:0016491//oxidoreductase activity;GO:0005488//binding;GO:0046872//metal ion binding;GO:0046914//transition metal ion binding;GO:0016627//oxidoreductase activity, acting on the CH-CH group of donors	GO:0019439//aromatic compound catabolic process;GO:0019637//organophosphate metabolic process;GO:0006950//response to stress;GO:0044237//cellular metabolic process;GO:0071704//organic substance metabolic process;GO:0044271//cellular nitrogen compound biosynthetic process;GO:0006753//nucleoside phosphate metabolic process;GO:0044260//cellular macromolecule metabolic process;GO:0044257//cellular pr…
Unigene0000799	2.081	0.608	0.965	0	15	4	7	0	--	-	-	-	-
Unigene0000800	1.5976	0.9725	0.5292	0	9	5	3	0	--	-	-	-	-
Unigene0000801	1.3529	1.297	1.0083	0	8	7	6	0	--	-	-	-	-
Unigene0000802	3.2931	2.3195	2.4543	0.8967	28	18	21	7	--	-	-	-	-
Unigene0000803	0.528	1.1571	0	0	4	8	0	0	--	-	-	-	-
Unigene0000804	0	0.3116	0.2826	0.3097	0	2	2	2	--	-	-	-	-
Unigene0000805	0	0.7796	0.707	1.0333	0	3	3	4	--	-	-	-	-
Unigene0000806	1.6508	0.4522	1.2303	0	8	2	6	0	--	-	-	-	-
Unigene0000807	2.6198	0	0.2367	0.5188	11	0	1	2	--	-	-	-	-
Unigene0000808	1.2991	2.9653	0.4303	0.3537	12	25	4	3	--	-	-	-	-
Unigene0000809	13.0937	14.53	13.4284	12.5241	156	158	161	137	PREDICTED: cytochrome c oxidase assembly protein COX19-like [Cucumis sativus]	-	-	-	-
Unigene0000810	0	0.1769	0	0	0	1	0	0	PREDICTED: cytochrome c oxidase assembly protein COX19-like [Cucumis melo]	-	-	-	-
Unigene0000811	0	2.0618	0.7012	0	0	8	3	0	bHLH family protein [Populus trichocarpa]	-	GO:0005622//intracellular;GO:0044424//intracellular part;GO:0043227//membrane-bounded organelle;GO:0043226//organelle;GO:0043229//intracellular organelle;GO:0044464//cell part;GO:0005623//cell;GO:0043231//intracellular membrane-bounded organelle	GO:0003676//nucleic acid binding;GO:1901363//heterocyclic compound binding;GO:0005488//binding;GO:0097159//organic cyclic compound binding;GO:0005515//protein binding	GO:1901576//organic substance biosynthetic process;GO:0009058//biosynthetic process;GO:0010468//regulation of gene expression;GO:0044260//cellular macromolecule metabolic process;GO:0009059//macromolecule biosynthetic process;GO:0065007//biological regulation;GO:0044237//cellular metabolic process;GO:0019222//regulation of metabolic process;GO:0009987//cellular process;GO:0071704//organic substan…
Unigene0000812	1.1568	7.0082	3.719	3.8539	17	94	55	52	PREDICTED: UDP-glycosyltransferase 73C6-like [Cucumis sativus]	-	-	GO:0016757//transferase activity, transferring glycosyl groups;GO:0016740//transferase activity;GO:0003824//catalytic activity	-
Unigene0000813	0	0.533	0.2417	1.5895	0	2	1	6	--	-	-	-	-
Unigene0000814	1.3073	2.1485	4.2582	1.8985	18	27	59	24	PREDICTED: pentatricopeptide repeat-containing protein At3g29230-like isoform X1 [Cucumis sativus]	-	-	-	-
Unigene0000815	0.2552	0.2796	1.5214	1.1117	1	1	6	4	PREDICTED: pentatricopeptide repeat-containing protein At3g29230-like [Cucumis melo]	-	-	-	-
Unigene0000816	0.9294	1.6548	0.6927	0.1265	8	13	6	1	PREDICTED: ORM1-like protein 3 [Cucumis melo]	-	GO:0043229//intracellular organelle;GO:0043231//intracellular membrane-bounded organelle;GO:0044464//cell part;GO:0031090//organelle membrane;GO:0016020//membrane;GO:0044424//intracellular part;GO:0043226//organelle;GO:0043227//membrane-bounded organelle;GO:0044422//organelle part;GO:0044425//membrane part;GO:0005623//cell;GO:0005622//intracellular;GO:0031224//intrinsic component of membrane	-	GO:0019637//organophosphate metabolic process;GO:0044255//cellular lipid metabolic process;GO:0044711//single-organism biosynthetic process;GO:0006796//phosphate-containing compound metabolic process;GO:0044260//cellular macromolecule metabolic process;GO:0008152//metabolic process;GO:0006629//lipid metabolic process;GO:0046474//glycerophospholipid biosynthetic process;GO:0044710//single-organism…
Unigene0000817	83.3475	72.4674	82.823	84.4888	1429	1134	1429	1330	PREDICTED: ORM1-like protein 3 [Cucumis melo]	-	GO:0043227//membrane-bounded organelle;GO:0043226//organelle;GO:0031090//organelle membrane;GO:0031224//intrinsic component of membrane;GO:0044422//organelle part;GO:0044425//membrane part;GO:0016020//membrane	-	GO:0044237//cellular metabolic process;GO:0019637//organophosphate metabolic process;GO:0044699//single-organism process;GO:1901576//organic substance biosynthetic process;GO:0046486//glycerolipid metabolic process;GO:0071704//organic substance metabolic process;GO:0044711//single-organism biosynthetic process;GO:0008152//metabolic process;GO:0009058//biosynthetic process;GO:0009266//response to …
Unigene0000818	1.1271	0.5292	0.96	0.7015	7	3	6	4	--	-	-	-	-
Unigene0000819	2.2386	0.327	1.0381	0.1625	15	2	7	1	PREDICTED: GDSL esterase/lipase At1g71691 [Cucumis sativus]	-	-	GO:0016787//hydrolase activity;GO:0016627//oxidoreductase activity, acting on the CH-CH group of donors;GO:0003824//catalytic activity;GO:0016491//oxidoreductase activity;GO:0016635//oxidoreductase activity, acting on the CH-CH group of donors, quinone or related compound as acceptor	GO:0044238//primary metabolic process;GO:0008152//metabolic process;GO:0044710//single-organism metabolic process;GO:0044237//cellular metabolic process;GO:0006629//lipid metabolic process;GO:0006720//isoprenoid metabolic process;GO:0071704//organic substance metabolic process;GO:0016119//carotene metabolic process;GO:0009987//cellular process;GO:0044255//cellular lipid metabolic process;GO:00422…
Unigene0000820	0.4949	0.8133	1.2294	2.4255	2	3	5	9	--	-	-	-	-
Unigene0000821	0.4949	0.5422	1.4753	0	2	2	6	0	--	-	-	-	-
Unigene0000822	0.5833	0.1598	0	0	8	2	0	0	PREDICTED: alpha-(1,4)-fucosyltransferase [Cucumis melo]	-	GO:0005622//intracellular;GO:0031224//intrinsic component of membrane;GO:0043226//organelle;GO:0044424//intracellular part;GO:0005623//cell;GO:0043227//membrane-bounded organelle;GO:0043229//intracellular organelle;GO:0043231//intracellular membrane-bounded organelle;GO:0044464//cell part;GO:0000139//Golgi membrane;GO:0044422//organelle part;GO:0031090//organelle membrane;GO:0005737//cytoplasm;GO…	GO:0016740//transferase activity;GO:0003824//catalytic activity;GO:0016757//transferase activity, transferring glycosyl groups;GO:0016758//transferase activity, transferring hexosyl groups	GO:0044237//cellular metabolic process;GO:0034645//cellular macromolecule biosynthetic process;GO:0044264//cellular polysaccharide metabolic process;GO:0036211//protein modification process;GO:0009059//macromolecule biosynthetic process;GO:0009987//cellular process;GO:0044710//single-organism metabolic process;GO:0044699//single-organism process;GO:0044711//single-organism biosynthetic process;GO…
Unigene0000823	10.5413	9.298	14.1432	18.9832	277	223	374	458	PREDICTED: alpha-(1,4)-fucosyltransferase [Cucumis melo]	-	GO:0043226//organelle;GO:0043231//intracellular membrane-bounded organelle;GO:0005623//cell;GO:0031090//organelle membrane;GO:0005622//intracellular;GO:0043229//intracellular organelle;GO:0016020//membrane;GO:0044464//cell part;GO:0044422//organelle part;GO:0000139//Golgi membrane;GO:0012505//endomembrane system;GO:0043227//membrane-bounded organelle;GO:0098588//bounding membrane of organelle;GO:…	GO:0016740//transferase activity;GO:0016757//transferase activity, transferring glycosyl groups;GO:0003824//catalytic activity;GO:0016758//transferase activity, transferring hexosyl groups	GO:0044249//cellular biosynthetic process;GO:0044723//single-organism carbohydrate metabolic process;GO:0044710//single-organism metabolic process;GO:0006464//cellular protein modification process;GO:0033692//cellular polysaccharide biosynthetic process;GO:0044237//cellular metabolic process;GO:0005976//polysaccharide metabolic process;GO:0071704//organic substance metabolic process;GO:0044711//s…
Unigene0000824	1.3371	1.7091	1.2179	0.4854	12	14	11	4	--	-	-	-	-
Unigene0000825	0.2258	0.1649	0.2244	0.1639	6	4	6	4	PREDICTED: protein POLAR LOCALIZATION DURING ASYMMETRIC DIVISION AND REDISTRIBUTION-like [Cucumis sativus]	-	-	-	-
Unigene0000826	0.0733	0.0803	0.1822	0.0799	2	2	5	2	PREDICTED: protein POLAR LOCALIZATION DURING ASYMMETRIC DIVISION AND REDISTRIBUTION-like [Cucumis sativus]	-	-	-	-
Unigene0000827	1.1135	1.22	1.6597	6.468	6	6	9	32	--	-	-	-	-
Unigene0000828	0.4255	3.108	1.9732	0.309	3	20	14	2	PREDICTED: transcription repressor OFP8-like [Cucumis sativus]	-	-	-	-
Unigene0000829	47.9268	61.6592	58.6884	94.7871	706	829	870	1282	PREDICTED: transmembrane protein 97-like [Cucumis sativus]	-	-	-	-
Unigene0000830	3.942	2.1595	0.8705	1.1926	18	9	4	5	--	-	-	-	-
Unigene0000831	1.3481	1.7724	0.2679	0.5873	5	6	1	2	--	-	-	-	-
Unigene0000832	0.5567	1.0167	0.3688	0.4043	3	5	2	2	--	-	-	-	-
Unigene0000833	2.5442	1.115	0	0	15	6	0	0	--	-	-	-	-
Unigene0000834	1.7387	2.3812	0.4319	0	8	10	2	0	--	-	-	-	-
Unigene0000835	2.7349	0	0	0.8936	10	0	0	3	--	-	-	-	-
Unigene0000836	0.2233	1.4678	2.8844	0.9727	1	6	13	4	PREDICTED: protein CHUP1, chloroplastic-like [Cucumis sativus]	-	-	-	-
Unigene0000837	4.0828	1.7132	1.7264	0.7569	47	18	20	8	--	-	-	-	-
Unigene0000838	1.2609	0.921	1.4618	0	6	4	7	0	--	-	-	-	-
Unigene0000839	0.2173	1.6669	0.216	0	1	7	1	0	--	-	-	-	-
Unigene0000840	0	0	0	0	0	0	0	0	--	-	-	-	-
Unigene0000841	0	0	0	0	0	0	0	0	--	-	-	-	-
Unigene0000842	0	2.2568	0	0	0	8	0	0	ternary complex factor MIP1 [Zea mays]	-	-	-	-
Unigene0000843	0.9073	0.3976	1.2622	0	5	2	7	0	--	-	-	-	-
Unigene0000844	0.5435	0.8932	1.8903	0.592	6	9	21	6	OSJNBb0003A12.9 [Oryza sativa Japonica Group]	-	-	GO:0005488//binding	-
Unigene0000845	0.5104	0.5592	0.5071	0	2	2	2	0	integrase [Gossypium hirsutum]	-	-	GO:0046872//metal ion binding;GO:0046914//transition metal ion binding;GO:0005488//binding;GO:0097159//organic cyclic compound binding;GO:0043167//ion binding;GO:0043169//cation binding	GO:0046483//heterocycle metabolic process;GO:0006725//cellular aromatic compound metabolic process;GO:0006259//DNA metabolic process;GO:0006139//nucleobase-containing compound metabolic process;GO:1901360//organic cyclic compound metabolic process;GO:0044238//primary metabolic process;GO:0071704//organic substance metabolic process;GO:0044260//cellular macromolecule metabolic process;GO:0008152//…
Unigene0000846	0.8966	0.2456	1.7819	0	4	1	8	0	--	-	-	-	-
Unigene0000847	0	0.8904	0	1.1802	0	3	0	4	PREDICTED: gamma-interferon-inducible lysosomal thiol reductase-like isoform X1 [Eucalyptus grandis]	-	GO:0044464//cell part;GO:0043227//membrane-bounded organelle;GO:0043229//intracellular organelle;GO:0005623//cell;GO:0043231//intracellular membrane-bounded organelle;GO:0043226//organelle;GO:0044424//intracellular part;GO:0005622//intracellular	-	-
Unigene0000848	0.9073	0.8284	0.9016	0.9882	6	5	6	6	Os07g0649700 [Oryza sativa Japonica Group]	-	-	-	-
Unigene0000849	2.4039	2.0485	2.3888	2.6182	9	7	9	9	protein maternal effect embryo arrest 60 [Arabidopsis thaliana]	-	-	-	GO:1901576//organic substance biosynthetic process;GO:0008152//metabolic process;GO:0044699//single-organism process;GO:0006796//phosphate-containing compound metabolic process;GO:0045017//glycerolipid biosynthetic process;GO:0046474//glycerophospholipid biosynthetic process;GO:0044238//primary metabolic process;GO:0006629//lipid metabolic process;GO:0019637//organophosphate metabolic process;GO:…
Unigene0000850	0.4885	0.2676	0.4855	0.6651	4	2	4	5	Maternal effect embryo arrest 60 [Theobroma cacao]	-	-	-	GO:0032502//developmental process;GO:0046474//glycerophospholipid biosynthetic process;GO:0009058//biosynthetic process;GO:0044763//single-organism cellular process;GO:0044238//primary metabolic process;GO:0006796//phosphate-containing compound metabolic process;GO:0008152//metabolic process;GO:0044699//single-organism process;GO:0022414//reproductive process;GO:0009987//cellular process;GO:00442…
Unigene0000851	0	0	0	0.7225	0	0	0	6	Maternal effect embryo arrest 60 [Theobroma cacao]	-	-	-	GO:0044710//single-organism metabolic process;GO:0045017//glycerolipid biosynthetic process;GO:0006793//phosphorus metabolic process;GO:0032502//developmental process;GO:0046486//glycerolipid metabolic process;GO:1901576//organic substance biosynthetic process;GO:0006644//phospholipid metabolic process;GO:0044255//cellular lipid metabolic process;GO:0044699//single-organism process;GO:0046474//gl…
Unigene0000852	0.5523	0	2.4695	0	2	0	9	0	--	-	-	-	-
Unigene0000853	2.4744	0.5422	1.7212	0.2695	10	2	7	1	--	-	-	-	-
Unigene0000854	0.9448	0.7764	0.2347	0.2573	4	3	1	1	--	-	-	-	-
Unigene0000855	2.671	0	0	0	10	0	0	0	--	-	-	-	-
Unigene0000856	3.9127	0.3728	1.0143	0	23	2	6	0	PREDICTED: GEM-like protein 4 isoform X4 [Cucumis melo]	-	-	-	-
Unigene0000857	0	0	2.7047	0	0	0	11	0	--	-	-	-	-
Unigene0000858	0.4803	0.5263	0.2387	0.5232	2	2	1	2	--	-	-	-	-
Unigene0000859	1.044	1.1439	0.5187	0	4	4	2	0	cytochrome c biogenesis C (mitochondrion) [Beta vulgaris subsp. vulgaris]	-	GO:0005622//intracellular;GO:0043227//membrane-bounded organelle;GO:0044424//intracellular part;GO:0005623//cell;GO:0043229//intracellular organelle;GO:0043226//organelle;GO:0043231//intracellular membrane-bounded organelle;GO:0044464//cell part	GO:0005215//transporter activity;GO:0046906//tetrapyrrole binding;GO:0051184//cofactor transporter activity;GO:0005488//binding;GO:1901363//heterocyclic compound binding;GO:0097159//organic cyclic compound binding	GO:0051179//localization;GO:0006461//protein complex assembly;GO:0070271//protein complex biogenesis;GO:0034622//cellular macromolecular complex assembly;GO:0051181//cofactor transport;GO:0044699//single-organism process;GO:0022607//cellular component assembly;GO:0071840//cellular component organization or biogenesis;GO:1902578//single-organism localization;GO:0065003//macromolecular complex asse…
Unigene0000860	41.7299	31.9489	45.7997	40.7941	1474	1030	1628	1323	PREDICTED: double-stranded RNA-binding protein 2 [Cucumis sativus]	-	GO:0044464//cell part;GO:0005623//cell;GO:0005622//intracellular;GO:0044424//intracellular part	GO:0003723//RNA binding;GO:0097159//organic cyclic compound binding;GO:0005488//binding;GO:0003676//nucleic acid binding;GO:1901363//heterocyclic compound binding	GO:0035194//posttranscriptional gene silencing by RNA;GO:0031047//gene silencing by RNA;GO:0006725//cellular aromatic compound metabolic process;GO:1901698//response to nitrogen compound;GO:0050789//regulation of biological process;GO:0071310//cellular response to organic substance;GO:0044699//single-organism process;GO:0016458//gene silencing;GO:0050896//response to stimulus;GO:0031050//dsRNA fr…
Unigene0000861	2.3294	0	0	0.7806	13	0	0	4	--	-	-	-	-
Unigene0000862	2.1764	1.3805	3.0733	0.7486	19	11	27	6	--	-	-	-	-
Unigene0000863	0.2422	0	1.6847	0.5276	1	0	7	2	--	-	-	-	-
Unigene0000864	1.7862	0.9785	1.2678	0	14	7	10	0	RNA-directed DNA polymerase (Reverse transcriptase) [Medicago truncatula]	-	GO:0044430//cytoskeletal part;GO:0044422//organelle part;GO:0043226//organelle;GO:0032991//macromolecular complex;GO:0043229//intracellular organelle;GO:0044446//intracellular organelle part;GO:0044424//intracellular part;GO:0005622//intracellular;GO:0043232//intracellular non-membrane-bounded organelle;GO:0043234//protein complex;GO:0005623//cell;GO:0043228//non-membrane-bounded organelle;GO:000…	GO:0097159//organic cyclic compound binding;GO:0003824//catalytic activity;GO:1901363//heterocyclic compound binding;GO:0016787//hydrolase activity;GO:0005488//binding	GO:0008152//metabolic process;GO:0043170//macromolecule metabolic process;GO:0044763//single-organism cellular process;GO:0071704//organic substance metabolic process;GO:0044237//cellular metabolic process;GO:0044699//single-organism process;GO:0009987//cellular process;GO:0044238//primary metabolic process
Unigene0000865	1.1153	1.222	0.5541	0	4	4	2	0	reverse transcriptase [Cucumis melo subsp. melo]	-	-	GO:0005488//binding	-
Unigene0000866	1.311	0.2873	0.5211	0	5	1	2	0	PREDICTED: serine/threonine-protein kinase pakD isoform X1 [Cucumis melo]	-	-	-	-
Unigene0000867	1.2266	0.5376	1.7064	0	5	2	7	0	--	-	-	-	-
Unigene0000868	1.2337	1.1264	1.4302	0.6718	6	5	7	3	--	-	-	-	-
Unigene0000869	0	0.2834	0.771	0.8451	0	1	3	3	--	-	-	-	-
Unigene0000870	0.2362	1.2939	1.4083	0.5145	1	5	6	2	--	-	-	-	-
Unigene0000871	0.9647	1.3212	2.1569	0	4	5	9	0	--	-	-	-	-
Unigene0000872	0.8073	0.5307	0.8023	1.231	10	6	10	14	--	-	-	-	-
Unigene0000873	0	2.6616	0	1.5564	0	17	0	10	--	-	-	-	-
Unigene0000874	2.5385	0.2877	0.6959	0.6674	29	3	8	7	--	-	-	-	-
Unigene0000875	138.983	390.614	820.975	1062.29	2716	6967	16145	19060	PREDICTED: polygalacturonase inhibitor-like [Cucumis melo]	-	GO:0005576//extracellular region	-	-
Unigene0000876	0.9923	1.5222	0.9861	0	5	7	5	0	GDT1-like protein 2 [Morus notabilis]	-	GO:0043227//membrane-bounded organelle;GO:0043226//organelle;GO:0005623//cell;GO:0044424//intracellular part;GO:0005622//intracellular;GO:0044464//cell part;GO:0043231//intracellular membrane-bounded organelle;GO:0043229//intracellular organelle	GO:0016787//hydrolase activity;GO:0008233//peptidase activity;GO:0004175//endopeptidase activity;GO:0003824//catalytic activity;GO:0005488//binding;GO:0070011//peptidase activity, acting on L-amino acid peptides;GO:1901363//heterocyclic compound binding;GO:0097159//organic cyclic compound binding	GO:1901362//organic cyclic compound biosynthetic process;GO:0097659//nucleic acid-templated transcription;GO:0009058//biosynthetic process;GO:0010467//gene expression;GO:0009059//macromolecule biosynthetic process;GO:0034641//cellular nitrogen compound metabolic process;GO:0006725//cellular aromatic compound metabolic process;GO:0019438//aromatic compound biosynthetic process;GO:0006807//nitrogen…
Unigene0000877	0.3736	0.614	1.2993	0.2034	2	3	7	1	--	-	-	-	-
Unigene0000878	2.8527	9.9554	6.1944	4.3728	27	86	59	38	PREDICTED: myb-like protein H isoform X1 [Populus euphratica]	-	-	-	-
Unigene0000879	191.929	95.3756	73.0404	31.889	2196	996	841	335	seed specific protein Bn15D1B [Brassica napus]	-	-	-	-
Unigene0000880	3.7938	0	0.2513	0	15	0	1	0	--	-	-	-	-
Unigene0000881	0	0	0	0	0	0	0	0	PREDICTED: hippocampus abundant transcript-like protein 1 [Cucumis sativus]	-	GO:0016020//membrane;GO:0031224//intrinsic component of membrane;GO:0044425//membrane part	GO:0005488//binding;GO:0036094//small molecule binding;GO:0097159//organic cyclic compound binding	GO:0044763//single-organism cellular process;GO:0009987//cellular process;GO:0044699//single-organism process
Unigene0000882	0	0	0	0	0	0	0	0	PREDICTED: hippocampus abundant transcript-like protein 1 [Cucumis sativus]	-	GO:0016020//membrane;GO:0031224//intrinsic component of membrane;GO:0044425//membrane part	GO:0097159//organic cyclic compound binding;GO:0005488//binding;GO:0036094//small molecule binding	GO:0044763//single-organism cellular process;GO:0009987//cellular process;GO:0044699//single-organism process
Unigene0000883	18.8835	14.5594	16.9956	16.8275	297	209	269	243	Dynein beta chain, ciliary [Gossypium arboreum]	-	-	-	-
Unigene0000884	0.4068	1.1143	1.6171	0.2215	2	5	8	1	--	-	-	-	-
Unigene0000885	0	0.3842	0	1.1458	0	2	0	6	Death-associated protein kinase 1 [Morus notabilis]	-	-	GO:0016772//transferase activity, transferring phosphorus-containing groups;GO:0003824//catalytic activity;GO:0016740//transferase activity	GO:0008152//metabolic process;GO:0006796//phosphate-containing compound metabolic process;GO:0044237//cellular metabolic process;GO:0009987//cellular process;GO:0006793//phosphorus metabolic process
Unigene0000886	0	0	0.3851	0.8441	0	0	2	4	Death-associated protein kinase 1 [Morus notabilis]	-	-	GO:0016740//transferase activity;GO:0003824//catalytic activity;GO:0016772//transferase activity, transferring phosphorus-containing groups	GO:0008152//metabolic process;GO:0006796//phosphate-containing compound metabolic process;GO:0044237//cellular metabolic process;GO:0006793//phosphorus metabolic process;GO:0009987//cellular process
Unigene0000887	0.3304	0.905	0.985	0.3599	2	5	6	2	PREDICTED: receptor-like cytosolic serine/threonine-protein kinase RBK2 [Cucumis sativus]	-	GO:0005737//cytoplasm;GO:0005622//intracellular;GO:0044464//cell part;GO:0043231//intracellular membrane-bounded organelle;GO:0044444//cytoplasmic part;GO:0042579//microbody;GO:0043226//organelle;GO:0043229//intracellular organelle;GO:0005623//cell;GO:0044424//intracellular part;GO:0043227//membrane-bounded organelle	GO:0003824//catalytic activity;GO:0032549//ribonucleoside binding;GO:0001883//purine nucleoside binding;GO:0097159//organic cyclic compound binding;GO:0016773//phosphotransferase activity, alcohol group as acceptor;GO:0016740//transferase activity;GO:0036094//small molecule binding;GO:1901363//heterocyclic compound binding;GO:0001882//nucleoside binding;GO:0016772//transferase activity, transferr…	GO:0043412//macromolecule modification;GO:0044267//cellular protein metabolic process;GO:0006796//phosphate-containing compound metabolic process;GO:0044260//cellular macromolecule metabolic process;GO:0006793//phosphorus metabolic process;GO:0036211//protein modification process;GO:0044237//cellular metabolic process;GO:0071704//organic substance metabolic process;GO:0016310//phosphorylation;GO:…
Unigene0000888	0	0	1.7829	0	0	0	7	0	--	-	-	-	-
Unigene0000889	0.1265	1.1084	3.1416	0	1	8	25	0	PREDICTED: agglutinin-like [Cucumis melo]	-	-	GO:0043167//ion binding;GO:0016668//oxidoreductase activity, acting on a sulfur group of donors, NAD(P) as acceptor;GO:0016667//oxidoreductase activity, acting on a sulfur group of donors;GO:0046914//transition metal ion binding;GO:0005488//binding;GO:0046872//metal ion binding;GO:0016491//oxidoreductase activity;GO:0043169//cation binding;GO:0003824//catalytic activity;GO:0016651//oxidoreductase…	GO:0050789//regulation of biological process;GO:0065007//biological regulation;GO:0007154//cell communication;GO:0050896//response to stimulus;GO:0044700//single organism signaling;GO:0051716//cellular response to stimulus;GO:0008152//metabolic process;GO:0044763//single-organism cellular process;GO:0044710//single-organism metabolic process;GO:0009987//cellular process;GO:0044699//single-organis…
Unigene0000890	1.1991	0.219	2.1846	0	6	1	11	0	--	-	-	-	-
Unigene0000891	1.7618	1.5013	0.7781	0	9	7	4	0	--	-	-	-	-
Unigene0000892	4.4552	4.1543	1.5071	0	47	40	16	0	--	-	-	-	-
Unigene0000893	0.2013	0.441	2	0	1	2	10	0	PREDICTED: retrovirus-related Pol polyprotein from transposon TNT 1-94 isoform X3 [Cucumis melo]	-	-	-	-
Unigene0000894	3.2819	1.4982	1.6306	1.7872	12	5	6	6	--	-	-	-	-
Unigene0000895	1.175	4.9222	4.1209	2.9358	17	65	60	39	bZIP-like protein [Oryza sativa Japonica Group]	-	GO:0044424//intracellular part;GO:0005622//intracellular;GO:0005623//cell;GO:0044464//cell part	GO:0005488//binding	-
Unigene0000896	0	2.4951	0	0.248	0	10	0	1	--	-	-	-	-
Unigene0000897	0.9409	1.5463	0.2337	0	4	6	1	0	--	-	-	-	-
Unigene0000898	18.6867	10.6886	6.8269	10.1763	136	71	50	68	--	-	-	-	-
Unigene0000899	0.4844	2.4767	1.1232	0.3517	3	14	7	2	--	-	-	-	-
Unigene0000900	1.6351	1.8661	0.8801	0.2968	24	25	13	4	PREDICTED: protein NRT1/ PTR FAMILY 5.8-like [Cucumis melo]	-	GO:0016020//membrane	GO:0022892//substrate-specific transporter activity;GO:0015075//ion transmembrane transporter activity;GO:0046943//carboxylic acid transmembrane transporter activity;GO:0022891//substrate-specific transmembrane transporter activity;GO:0022857//transmembrane transporter activity;GO:0005342//organic acid transmembrane transporter activity;GO:0005215//transporter activity;GO:0008514//organic anion t…	GO:0009605//response to external stimulus;GO:0051707//response to other organism;GO:0006810//transport;GO:0050896//response to stimulus;GO:0051704//multi-organism process;GO:1902578//single-organism localization;GO:0051234//establishment of localization;GO:0015833//peptide transport;GO:0044699//single-organism process;GO:0009607//response to biotic stimulus;GO:0051179//localization;GO:0071705//ni…
Unigene0000901	2.8254	0.7144	0.4319	0	13	3	2	0	--	-	-	-	-
Unigene0000902	1.5402	0	1.5305	0	9	0	9	0	--	-	-	-	-
Unigene0000903	1.094	0.1498	1.7665	0.2979	8	1	13	2	pol protein [Cucumis melo subsp. melo]	-	-	GO:0043169//cation binding;GO:0043167//ion binding;GO:0005488//binding;GO:0046914//transition metal ion binding;GO:0097159//organic cyclic compound binding;GO:0046872//metal ion binding	GO:0006139//nucleobase-containing compound metabolic process;GO:0046483//heterocycle metabolic process;GO:0090304//nucleic acid metabolic process;GO:0008152//metabolic process;GO:0006807//nitrogen compound metabolic process;GO:0044260//cellular macromolecule metabolic process;GO:1901360//organic cyclic compound metabolic process;GO:0006259//DNA metabolic process;GO:0071704//organic substance meta…
Unigene0000904	4.2869	0.2609	0.4733	0	18	1	2	0	--	-	-	-	-
Unigene0000905	0.6351	0.3479	2.9978	0.1729	4	2	19	1	--	-	-	-	-
Unigene0000906	1.4239	1.5601	5.0533	1.1077	7	7	25	5	--	-	-	-	-
Unigene0000907	0.6351	3.1313	1.8933	5.8796	4	18	12	34	PREDICTED: auxin-induced protein 15A-like [Cucumis sativus]	ko04075//Plant hormone signal transduction//Signal transduction//Environmental Information Processing	-	-	-
Unigene0000908	2.4283	0	1.2993	0	13	0	7	0	--	-	-	-	-
Unigene0000909	0.4234	4.639	0.2104	0	2	20	1	0	--	-	-	-	-
Unigene0000910	0	0	0	0	0	0	0	0	PREDICTED: dnaJ protein P58IPK homolog [Cicer arietinum]	-	-	-	-
Unigene0000911	0.5146	0.4833	0.2922	0.4804	14	12	8	12	Protein HLJ1 [Morus notabilis]	-	-	-	-
Unigene0000912	0	0	0	0	0	0	0	0	--	-	-	-	-
Unigene0000913	0	0	0	0	0	0	0	0	--	-	-	-	-
Unigene0000914	1.0634	3.7867	1.8493	0	4	13	7	0	--	-	-	-	-
Unigene0000915	1.6882	1.3212	0.4793	0	7	5	2	0	--	-	-	-	-
Unigene0000916	0	0	0	0	0	0	0	0	PREDICTED: mini zinc finger protein 2 [Cucumis melo]	-	-	GO:1901363//heterocyclic compound binding;GO:0003676//nucleic acid binding;GO:0005488//binding;GO:0097159//organic cyclic compound binding	-
Unigene0000917	2.8669	1.6687	2.4037	0.7806	32	17	27	8	PREDICTED: mini zinc finger protein 2 [Cucumis melo]	-	-	GO:0003676//nucleic acid binding;GO:0097159//organic cyclic compound binding;GO:0005488//binding;GO:1901363//heterocyclic compound binding	-
Unigene0000918	0	0.2337	1.2716	1.6261	0	1	6	7	PREDICTED: probable glycerophosphoryl diester phosphodiesterase 2 [Cucumis melo]	-	-	GO:0016787//hydrolase activity;GO:0008081//phosphoric diester hydrolase activity;GO:0042578//phosphoric ester hydrolase activity;GO:0003824//catalytic activity;GO:0016788//hydrolase activity, acting on ester bonds	GO:0044262//cellular carbohydrate metabolic process;GO:0071704//organic substance metabolic process;GO:0006066//alcohol metabolic process;GO:0044281//small molecule metabolic process;GO:1901615//organic hydroxy compound metabolic process;GO:0044699//single-organism process;GO:0044763//single-organism cellular process;GO:0019751//polyol metabolic process;GO:0008152//metabolic process;GO:0005975//c…
Unigene0000919	0.8595	2.8252	1.7083	0	6	18	12	0	--	-	-	-	-
Unigene0000920	1.2942	0.709	1.5004	0	6	3	7	0	--	-	-	-	-
Unigene0000921	1.6409	0	0.8153	0	6	0	3	0	--	-	-	-	-
Unigene0000922	0	0.2095	0	0	0	1	0	0	--	-	-	-	-
Unigene0000923	2.948	1.2561	0.3255	1.0703	18	7	2	6	--	-	-	-	-
Unigene0000924	0.438	0.9598	2.8291	0	2	4	13	0	--	-	-	-	-
Unigene0000925	0.4865	1.8655	1.6919	0.2649	2	7	7	1	--	-	-	-	-
Unigene0000926	0.6081	2.4429	0.2014	2.2076	3	11	1	10	hypothetical protein [Cucumis melo subsp. melo]	-	-	-	-
Unigene0000927	3.6407	1.1967	3.9796	2.7757	30	9	33	21	BnaC04g23880D [Brassica napus]	-	-	-	-
Unigene0000928	0	0	0	0	0	0	0	0	PREDICTED: dolichyl-diphosphooligosaccharide--protein glycosyltransferase subunit DAD1 [Cucumis sativus]	ko04141//Protein processing in endoplasmic reticulum//Folding, sorting and degradation//Genetic Information Processing;ko00510//N-Glycan biosynthesis//Glycan biosynthesis and metabolism//Metabolism	GO:0044424//intracellular part;GO:0043231//intracellular membrane-bounded organelle;GO:0005622//intracellular;GO:0031224//intrinsic component of membrane;GO:0031090//organelle membrane;GO:0043229//intracellular organelle;GO:0016020//membrane;GO:0043226//organelle;GO:0005623//cell;GO:0044464//cell part;GO:0044422//organelle part;GO:0043227//membrane-bounded organelle;GO:0044425//membrane part	GO:0003824//catalytic activity;GO:0016757//transferase activity, transferring glycosyl groups;GO:0016758//transferase activity, transferring hexosyl groups;GO:0016740//transferase activity;GO:0004576//oligosaccharyl transferase activity	GO:0050794//regulation of cellular process;GO:0043170//macromolecule metabolic process;GO:0006464//cellular protein modification process;GO:0009987//cellular process;GO:0036211//protein modification process;GO:0043412//macromolecule modification;GO:0019538//protein metabolic process;GO:0050789//regulation of biological process;GO:0065007//biological regulation;GO:0008152//metabolic process;GO:004…
Unigene0000929	0	0	0	0	0	0	0	0	PREDICTED: dolichyl-diphosphooligosaccharide--protein glycosyltransferase subunit DAD1 [Cucumis sativus]	ko04141//Protein processing in endoplasmic reticulum//Folding, sorting and degradation//Genetic Information Processing;ko00510//N-Glycan biosynthesis//Glycan biosynthesis and metabolism//Metabolism	GO:0016020//membrane;GO:0043227//membrane-bounded organelle;GO:0031224//intrinsic component of membrane;GO:0005623//cell;GO:0044422//organelle part;GO:0044425//membrane part;GO:0043226//organelle;GO:0044424//intracellular part;GO:0005622//intracellular;GO:0043229//intracellular organelle;GO:0043231//intracellular membrane-bounded organelle;GO:0044464//cell part;GO:0031090//organelle membrane	GO:0016740//transferase activity;GO:0004576//oligosaccharyl transferase activity;GO:0016757//transferase activity, transferring glycosyl groups;GO:0003824//catalytic activity;GO:0016758//transferase activity, transferring hexosyl groups	GO:0043170//macromolecule metabolic process;GO:0050789//regulation of biological process;GO:0043412//macromolecule modification;GO:0044238//primary metabolic process;GO:0044267//cellular protein metabolic process;GO:0065007//biological regulation;GO:0071704//organic substance metabolic process;GO:0043067//regulation of programmed cell death;GO:0006464//cellular protein modification process;GO:000…
Unigene0000930	22.1615	9.2557	20.1142	10.9334	404	154	369	183	PREDICTED: transport inhibitor response 1-like protein [Cucumis sativus]	-	-	-	-
Unigene0000931	2.1651	2.2931	3.0121	1.6507	30	29	42	21	PREDICTED: DNA-directed RNA polymerases II and IV subunit 5A [Populus euphratica]	ko00230//Purine metabolism//Nucleotide metabolism//Metabolism;ko00240//Pyrimidine metabolism//Nucleotide metabolism//Metabolism;ko03020//RNA polymerase//Transcription//Genetic Information Processing	GO:0044464//cell part;GO:0044424//intracellular part;GO:0043229//intracellular organelle;GO:0043227//membrane-bounded organelle;GO:0043231//intracellular membrane-bounded organelle;GO:0043226//organelle;GO:0005622//intracellular;GO:0005623//cell	GO:0097159//organic cyclic compound binding;GO:1901363//heterocyclic compound binding;GO:0034062//RNA polymerase activity;GO:0016772//transferase activity, transferring phosphorus-containing groups;GO:0005488//binding;GO:0016740//transferase activity;GO:0016779//nucleotidyltransferase activity;GO:0003676//nucleic acid binding;GO:0003824//catalytic activity	GO:1901576//organic substance biosynthetic process;GO:0043170//macromolecule metabolic process;GO:0009059//macromolecule biosynthetic process;GO:0009058//biosynthetic process;GO:0034645//cellular macromolecule biosynthetic process;GO:0044249//cellular biosynthetic process;GO:0044260//cellular macromolecule metabolic process;GO:0071704//organic substance metabolic process;GO:0009987//cellular proc…
Unigene0000932	1.441	1.5788	0.9546	0	6	6	4	0	--	-	-	-	-
Unigene0000933	1.8626	0.8928	0.5784	1.0143	16	7	5	8	--	-	-	-	-
Unigene0000934	42.253	40.8912	101.014	104.246	377	333	907	854	Histone H4 [Triticum urartu]	-	GO:0032991//macromolecular complex;GO:0009536//plastid;GO:0043232//intracellular non-membrane-bounded organelle;GO:0044446//intracellular organelle part;GO:0043229//intracellular organelle;GO:0005911//cell-cell junction;GO:0044424//intracellular part;GO:0043228//non-membrane-bounded organelle;GO:0031090//organelle membrane;GO:0005737//cytoplasm;GO:0044464//cell part;GO:0005622//intracellular;GO:0…	GO:0003676//nucleic acid binding;GO:1901363//heterocyclic compound binding;GO:0097159//organic cyclic compound binding;GO:0005515//protein binding;GO:0005488//binding;GO:0046983//protein dimerization activity	GO:0034728//nucleosome organization;GO:0071822//protein complex subunit organization;GO:0006950//response to stress;GO:0051276//chromosome organization;GO:0071840//cellular component organization or biogenesis;GO:0006325//chromatin organization;GO:0050896//response to stimulus;GO:0071824//protein-DNA complex subunit organization;GO:0006996//organelle organization;GO:0009987//cellular process;GO:0…
Unigene0000935	1.8927	4.1474	2.304	2.6798	40	80	49	52	PREDICTED: photosynthetic NDH subunit of subcomplex B 2, chloroplastic [Cucumis sativus]	-	-	GO:0005488//binding	GO:0044238//primary metabolic process;GO:0008152//metabolic process
Unigene0000936	1.1626	0.6369	0	0.8441	6	3	0	4	--	-	-	-	-
Unigene0000937	0.9655	1.481	0.3838	0	5	7	2	0	PREDICTED: myosin-11 isoform X2 [Cucumis sativus]	-	GO:0005622//intracellular;GO:0016020//membrane;GO:0043228//non-membrane-bounded organelle;GO:0044425//membrane part;GO:0031224//intrinsic component of membrane;GO:0044464//cell part;GO:0043226//organelle;GO:0005623//cell;GO:0005856//cytoskeleton;GO:0015629//actin cytoskeleton;GO:0044424//intracellular part;GO:0043232//intracellular non-membrane-bounded organelle;GO:0043229//intracellular organelle	GO:0017111//nucleoside-triphosphatase activity;GO:0016817//hydrolase activity, acting on acid anhydrides;GO:0005515//protein binding;GO:0016462//pyrophosphatase activity;GO:0097367//carbohydrate derivative binding;GO:1901363//heterocyclic compound binding;GO:0032550//purine ribonucleoside binding;GO:0016818//hydrolase activity, acting on acid anhydrides, in phosphorus-containing anhydrides;GO:001…	GO:0050789//regulation of biological process;GO:0065007//biological regulation;GO:0050794//regulation of cellular process
Unigene0000938	0.3126	0.4403	0.3106	0.0486	7	9	7	1	PREDICTED: nucleolin 1 isoform X1 [Cucumis sativus]	-	-	GO:0005488//binding;GO:0097159//organic cyclic compound binding;GO:0036094//small molecule binding	-
Unigene0000939	106.439	93.2433	131.997	154.852	4944	3953	6170	6604	PREDICTED: nucleolin 1 isoform X1 [Cucumis sativus]	-	-	GO:0036094//small molecule binding;GO:0097159//organic cyclic compound binding;GO:0005488//binding	-
Unigene0000940	0.6316	2.941	0.9414	1.0318	4	17	6	6	PREDICTED: cellulose synthase-like protein B4 [Cucumis sativus]	-	GO:0016020//membrane	GO:0003824//catalytic activity;GO:0016758//transferase activity, transferring hexosyl groups;GO:0046527//glucosyltransferase activity;GO:0016759//cellulose synthase activity;GO:0016740//transferase activity;GO:0016757//transferase activity, transferring glycosyl groups	GO:0071704//organic substance metabolic process;GO:0008152//metabolic process;GO:0044260//cellular macromolecule metabolic process;GO:0006073//cellular glucan metabolic process;GO:0044262//cellular carbohydrate metabolic process;GO:0005975//carbohydrate metabolic process;GO:0044264//cellular polysaccharide metabolic process;GO:0043170//macromolecule metabolic process;GO:0044237//cellular metaboli…
Unigene0000941	0.9898	0.2711	0.2459	0.2695	4	1	1	1	--	-	-	-	-
Unigene0000942	1.211	0	0.722	0.2638	5	0	3	1	--	-	-	-	-
Unigene0000943	0	1.8115	0	0.2573	0	7	0	1	--	-	-	-	-
Unigene0000944	0.4555	0	0.4526	1.7362	2	0	2	7	PREDICTED: rho-associated protein kinase 1 [Cucumis sativus]	-	-	-	-
Unigene0000945	1.533	0.9598	0.2176	1.6697	7	4	1	7	PREDICTED: myosin-6 [Cucumis melo]	-	-	-	-
Unigene0000946	4.7386	2.4877	0.8829	0	48	23	9	0	--	-	-	-	-
Unigene0000947	0.5367	0.588	0.2667	0	2	2	1	0	--	-	-	-	-
Unigene0000948	2.7747	0.608	0.5515	0	10	2	2	0	--	-	-	-	-
Unigene0000949	0.5036	0.5518	0.5004	0.2743	2	2	2	1	--	-	-	-	-
Unigene0000950	0.7145	0	1.42	0.5188	3	0	6	2	--	-	-	-	-
Unigene0000951	1.0253	0.2808	1.5282	0.8375	4	1	6	3	Dihydrolipoyllysine-residue acetyltransferase component 3 of pyruvate dehydrogenase complex [Morus notabilis]	-	-	GO:0003824//catalytic activity	-
Unigene0000952	1.9772	0.1969	1.0717	0.5873	11	1	6	3	--	-	-	-	-
Unigene0000953	0	0	0	0	0	0	0	0	PREDICTED: LOW QUALITY PROTEIN: pantoate--beta-alanine ligase [Cucumis sativus]	ko00410//beta-Alanine metabolism//Metabolism of other amino acids//Metabolism;ko00770//Pantothenate and CoA biosynthesis//Metabolism of cofactors and vitamins//Metabolism	GO:0005622//intracellular;GO:0005737//cytoplasm;GO:0005623//cell;GO:0044444//cytoplasmic part;GO:0044464//cell part;GO:0044424//intracellular part	GO:0046983//protein dimerization activity;GO:0016881//acid-amino acid ligase activity;GO:0032550//purine ribonucleoside binding;GO:0001882//nucleoside binding;GO:0001883//purine nucleoside binding;GO:1901363//heterocyclic compound binding;GO:0016874//ligase activity;GO:0016879//ligase activity, forming carbon-nitrogen bonds;GO:0005488//binding;GO:0097159//organic cyclic compound binding;GO:000382…	GO:0009108//coenzyme biosynthetic process;GO:0044249//cellular biosynthetic process;GO:0032502//developmental process;GO:0006732//coenzyme metabolic process;GO:0009058//biosynthetic process;GO:0008152//metabolic process;GO:0003006//developmental process involved in reproduction;GO:0051188//cofactor biosynthetic process;GO:0009987//cellular process;GO:0022414//reproductive process;GO:0044237//cell…
Unigene0000954	0	0	0	0	0	0	0	0	PREDICTED: LOW QUALITY PROTEIN: pantoate--beta-alanine ligase [Cucumis sativus]	ko00410//beta-Alanine metabolism//Metabolism of other amino acids//Metabolism;ko00770//Pantothenate and CoA biosynthesis//Metabolism of cofactors and vitamins//Metabolism	GO:0044444//cytoplasmic part;GO:0044464//cell part;GO:0005622//intracellular;GO:0005737//cytoplasm;GO:0005623//cell;GO:0044424//intracellular part	GO:0016874//ligase activity;GO:0032549//ribonucleoside binding;GO:0046983//protein dimerization activity;GO:0036094//small molecule binding;GO:0005488//binding;GO:1901363//heterocyclic compound binding;GO:0097159//organic cyclic compound binding;GO:0005515//protein binding;GO:0001882//nucleoside binding;GO:0097367//carbohydrate derivative binding;GO:0032550//purine ribonucleoside binding;GO:00018…	GO:0051186//cofactor metabolic process;GO:0044237//cellular metabolic process;GO:0009108//coenzyme biosynthetic process;GO:0009987//cellular process;GO:0006732//coenzyme metabolic process;GO:0051188//cofactor biosynthetic process;GO:0044249//cellular biosynthetic process;GO:0003006//developmental process involved in reproduction;GO:0032502//developmental process;GO:0022414//reproductive process;G…
Unigene0000955	2.6341	1.1544	0	0.2869	10	4	0	1	--	-	-	-	-
Unigene0000956	1.5379	1.1233	0.5094	0	6	4	2	0	--	-	-	-	-
Unigene0000957	1.0734	0.294	0.8	0	4	1	3	0	--	-	-	-	-
Unigene0000958	1.9294	1.057	0	0	8	4	0	0	hypothetical protein POPTR_0018s03300g [Populus trichocarpa]	-	-	-	-
Unigene0000959	9.6187	6.1778	6.3721	8.9108	87	51	58	74	--	-	-	-	-
Unigene0000960	1.441	0.5263	0.9546	0	6	2	4	0	--	-	-	-	-
Unigene0000961	1.0207	0.8387	1.0143	0	4	3	4	0	--	-	-	-	-
Unigene0000962	1.6045	1.0987	1.1958	0	8	5	6	0	--	-	-	-	-
Unigene0000963	0.461	0	0.229	2.7613	2	0	1	11	--	-	-	-	-
Unigene0000964	1.8979	0.6116	1.775	0.608	17	5	16	5	Poly [Medicago truncatula]	ko03410//Base excision repair//Replication and repair//Genetic Information Processing	-	GO:0016740//transferase activity;GO:0016757//transferase activity, transferring glycosyl groups;GO:0003824//catalytic activity	-
Unigene0000965	0	0.5241	0	1.0419	0	2	0	4	--	-	-	-	-
Unigene0000966	1.317	1.7316	1.3087	0	10	12	10	0	--	-	-	-	-
Unigene0000967	0	0	0	0	0	0	0	0	PREDICTED: microtubule-associated protein 70-5 [Cucumis sativus]	-	GO:0005622//intracellular;GO:0044464//cell part;GO:0044424//intracellular part;GO:0005623//cell	GO:0005488//binding;GO:0008092//cytoskeletal protein binding;GO:0005515//protein binding;GO:0015631//tubulin binding	GO:0009987//cellular process;GO:0016043//cellular component organization;GO:0006996//organelle organization;GO:0071554//cell wall organization or biogenesis;GO:0071840//cellular component organization or biogenesis
Unigene0000968	0.5042	1.1738	1.0646	0.6177	8	17	17	9	PREDICTED: microtubule-associated protein 70-5 [Cucumis sativus]	-	GO:0044424//intracellular part;GO:0044464//cell part;GO:0005622//intracellular;GO:0005623//cell	GO:0015631//tubulin binding;GO:0005488//binding;GO:0005515//protein binding;GO:0008092//cytoskeletal protein binding	GO:0006996//organelle organization;GO:0016043//cellular component organization;GO:0071840//cellular component organization or biogenesis;GO:0071554//cell wall organization or biogenesis;GO:0009987//cellular process
Unigene0000969	27.8058	110.952	16.763	11.6868	539	1963	327	208	PREDICTED: probable calcium-binding protein CML30 [Cucumis melo]	ko04626//Plant-pathogen interaction//Environmental adaptation//Organismal Systems;ko04070//Phosphatidylinositol signaling system//Signal transduction//Environmental Information Processing	-	-	-
Unigene0000970	4.4198	3.3734	3.6024	5.1383	89	62	73	95	Chaperone DnaJ [Gossypium arboreum]	-	-	-	GO:0033015//tetrapyrrole catabolic process;GO:0051187//cofactor catabolic process;GO:0008152//metabolic process;GO:0034641//cellular nitrogen compound metabolic process;GO:0006787//porphyrin-containing compound catabolic process;GO:0044237//cellular metabolic process;GO:0006778//porphyrin-containing compound metabolic process;GO:1901575//organic substance catabolic process;GO:0009056//catabolic p…
Unigene0000971	2.6089	1.5592	0.9427	0.5166	22	12	8	4	PREDICTED: protein AF-9-like [Cucumis melo]	-	-	-	-
Unigene0000972	1.1889	2.7054	0.727	0.498	13	27	8	5	PREDICTED: protein AF-9-like [Cucumis melo]	-	-	-	-
Unigene0000973	0.2319	0.0847	0.1536	0	6	2	4	0	gag/pol [Oryza sativa Japonica Group]	-	-	-	-
Unigene0000974	0.4198	0.3833	0.4867	0.2286	12	10	14	6	PREDICTED: retrovirus-related Pol polyprotein from transposon TNT 1-94 isoform X1 [Tarenaya hassleriana]	-	-	GO:0005488//binding	-
Unigene0000975	0.8896	0	1.105	0.4845	4	0	5	2	--	-	-	-	-
Unigene0000976	0.8284	0	2.058	0.2256	4	0	10	1	--	-	-	-	-
Unigene0000977	0.7724	1.1284	0.7676	1.1217	3	4	3	4	--	-	-	-	-
Unigene0000978	0	1.9639	0.1979	0.4338	0	9	1	2	--	-	-	-	-
Unigene0000979	0.1759	0.9635	1.5729	0.1916	1	5	9	1	Os12g0156200 [Oryza sativa Japonica Group]	-	GO:0043231//intracellular membrane-bounded organelle;GO:0044464//cell part;GO:0043227//membrane-bounded organelle;GO:0044424//intracellular part;GO:0005623//cell;GO:0043229//intracellular organelle;GO:0043226//organelle;GO:0005622//intracellular	GO:0003676//nucleic acid binding;GO:0005488//binding;GO:1901363//heterocyclic compound binding;GO:0097159//organic cyclic compound binding	GO:0034645//cellular macromolecule biosynthetic process;GO:1901360//organic cyclic compound metabolic process;GO:0009987//cellular process;GO:0006725//cellular aromatic compound metabolic process;GO:0006807//nitrogen compound metabolic process;GO:0009059//macromolecule biosynthetic process;GO:0009058//biosynthetic process;GO:0044260//cellular macromolecule metabolic process;GO:0006139//nucleobase…
Unigene0000980	4.7887	4.8002	1.62	0.3329	47	43	16	3	--	-	-	-	-
Unigene0000981	0.7086	2.0703	0	0	3	8	0	0	--	-	-	-	-
Unigene0000982	12.9577	8.4253	14.4406	14.1129	214	127	240	214	PREDICTED: HVA22-like protein h isoform X2 [Cucumis melo]	-	-	-	-
Unigene0000983	0	0	0	0	0	0	0	0	PREDICTED: HVA22-like protein h isoform X2 [Cucumis melo]	-	-	-	-
Unigene0000984	1.3242	0.4836	0.4386	0	6	2	2	0	--	-	-	-	-
Unigene0000985	34.2075	40.7518	41.2406	52.9064	1088	1183	1320	1545	PREDICTED: protein GPR107 [Cucumis melo]	-	GO:0043227//membrane-bounded organelle;GO:0031224//intrinsic component of membrane;GO:0005622//intracellular;GO:0044425//membrane part;GO:0044464//cell part;GO:0044422//organelle part;GO:0044424//intracellular part;GO:0043231//intracellular membrane-bounded organelle;GO:0043226//organelle;GO:0044446//intracellular organelle part;GO:0031984//organelle subcompartment;GO:0016020//membrane;GO:0043229…	-	-
Unigene0000986	0	0	0	0	0	0	0	0	PREDICTED: protein GPR107 [Cucumis melo]	-	GO:0044425//membrane part;GO:0031984//organelle subcompartment;GO:0005622//intracellular;GO:0016020//membrane;GO:0043231//intracellular membrane-bounded organelle;GO:0043226//organelle;GO:0044424//intracellular part;GO:0031224//intrinsic component of membrane;GO:0043227//membrane-bounded organelle;GO:0044446//intracellular organelle part;GO:0005623//cell;GO:0044422//organelle part;GO:0044464//cel…	-	-
Unigene0000987	1.4719	0.5376	0.9751	0.5344	6	2	4	2	--	-	-	-	-
Unigene0000988	4.6834	16.2105	5.9232	2.7823	44	139	56	24	PREDICTED: umecyanin-like [Cucumis sativus]	-	-	-	-
Unigene0000989	2.0333	0.9901	0.449	0	9	4	2	0	--	-	-	-	-
Unigene0000990	0.2659	0.5826	0.7926	1.1582	1	2	3	4	--	-	-	-	-
Unigene0000991	2.0861	0	0.8292	0.4544	10	0	4	2	PREDICTED: putative endo-1,3(4)-beta-glucanase 2 [Cucumis sativus]	-	-	-	-
Unigene0000992	0.9332	1.2781	3.2457	2.541	4	5	14	10	PREDICTED: LOB domain-containing protein 21 [Cucumis sativus]	-	-	-	-
Unigene0000993	0.6398	0.4674	0.6358	1.6261	3	2	3	7	--	-	-	-	-
Unigene0000994	0	0	1.1192	0	0	0	8	0	PREDICTED: deoxyhypusine synthase isoform X2 [Cucumis melo]	-	-	GO:0003824//catalytic activity;GO:0016740//transferase activity;GO:0016765//transferase activity, transferring alkyl or aryl (other than methyl) groups	GO:0036211//protein modification process;GO:0044707//single-multicellular organism process;GO:0006575//cellular modified amino acid metabolic process;GO:0043170//macromolecule metabolic process;GO:0008152//metabolic process;GO:0006464//cellular protein modification process;GO:1901564//organonitrogen compound metabolic process;GO:0044238//primary metabolic process;GO:0007275//multicellular organis…
Unigene0000995	2.6927	2.5033	2.4731	0.4888	66	56	61	11	PREDICTED: probable dolichyl-diphosphooligosaccharide--protein glycosyltransferase subunit 3B [Cucumis melo]	ko04141//Protein processing in endoplasmic reticulum//Folding, sorting and degradation//Genetic Information Processing;ko00510//N-Glycan biosynthesis//Glycan biosynthesis and metabolism//Metabolism	-	-	-
Unigene0000996	0.3739	0.256	0	0	8	5	0	0	PREDICTED: probable dolichyl-diphosphooligosaccharide--protein glycosyltransferase subunit 3B [Cucumis melo]	ko04141//Protein processing in endoplasmic reticulum//Folding, sorting and degradation//Genetic Information Processing;ko00510//N-Glycan biosynthesis//Glycan biosynthesis and metabolism//Metabolism	-	-	-
Unigene0000997	0.8642	0	0.2454	0.1345	7	0	2	1	--	-	-	-	-
Unigene0000998	0.9958	1.091	1.1874	0	5	5	6	0	--	-	-	-	-
Unigene0000999	2.4972	0	0	0	9	0	0	0	--	-	-	-	-
Unigene0001000	0.7013	0	1.2196	0.3819	4	0	7	2	--	-	-	-	-
Unigene0001001	1.842	1.9551	0.858	1.2539	32	31	15	20	Os03g0197300 [Oryza sativa Japonica Group]	-	-	-	-
Unigene0001002	0.9044	0	0.8987	0.985	5	0	5	5	Cupin family protein, expressed [Oryza sativa Japonica Group]	-	-	-	-
Unigene0001003	0	0	0	0	0	0	0	0	PREDICTED: protein SENSITIVE TO PROTON RHIZOTOXICITY 1 [Cucumis sativus]	-	GO:0044464//cell part;GO:0044424//intracellular part;GO:0005622//intracellular;GO:0043231//intracellular membrane-bounded organelle;GO:0043226//organelle;GO:0043227//membrane-bounded organelle;GO:0043229//intracellular organelle;GO:0005623//cell	GO:0001071//nucleic acid binding transcription factor activity;GO:0097159//organic cyclic compound binding;GO:0043167//ion binding;GO:0043169//cation binding;GO:0005488//binding	GO:0010035//response to inorganic substance;GO:0044249//cellular biosynthetic process;GO:0065007//biological regulation;GO:0044237//cellular metabolic process;GO:0042221//response to chemical;GO:0071704//organic substance metabolic process;GO:0009059//macromolecule biosynthetic process;GO:0050789//regulation of biological process;GO:0009268//response to pH;GO:0050896//response to stimulus;GO:0009…
Unigene0001004	1.0919	2.1832	0.651	0.2973	40	73	24	10	PREDICTED: protein SENSITIVE TO PROTON RHIZOTOXICITY 1 [Cucumis sativus]	-	GO:0044424//intracellular part;GO:0005623//cell;GO:0043226//organelle;GO:0005622//intracellular;GO:0043231//intracellular membrane-bounded organelle;GO:0043229//intracellular organelle;GO:0043227//membrane-bounded organelle;GO:0044464//cell part	GO:0043167//ion binding;GO:0005488//binding;GO:0097159//organic cyclic compound binding;GO:0001071//nucleic acid binding transcription factor activity;GO:0043169//cation binding	GO:0043170//macromolecule metabolic process;GO:0071704//organic substance metabolic process;GO:0044260//cellular macromolecule metabolic process;GO:0060255//regulation of macromolecule metabolic process;GO:0009058//biosynthetic process;GO:0009987//cellular process;GO:0008152//metabolic process;GO:0010038//response to metal ion;GO:0065007//biological regulation;GO:0050789//regulation of biological…
Unigene0001005	1.0908	1.3744	2.2763	2.1979	20	23	42	37	--	-	-	-	-
Unigene0001006	2.7868	2.0789	3.2996	0.9687	47	32	56	15	--	-	-	-	-
Unigene0001007	1.4003	1.5343	0.3795	0.9706	11	11	3	7	--	-	-	-	-
Unigene0001008	1.1035	0.9672	0.4386	0.2404	5	4	2	1	--	-	-	-	-
Unigene0001009	0	0	0	0	0	0	0	0	DNA-directed RNA polymerase subunit beta [Gossypium arboreum]	-	GO:0044422//organelle part;GO:0005623//cell;GO:0044424//intracellular part;GO:0043229//intracellular organelle;GO:0044446//intracellular organelle part;GO:0005622//intracellular;GO:0043227//membrane-bounded organelle;GO:0031984//organelle subcompartment;GO:0044464//cell part;GO:0043231//intracellular membrane-bounded organelle;GO:0043226//organelle	-	GO:0044249//cellular biosynthetic process;GO:0046394//carboxylic acid biosynthetic process;GO:0044260//cellular macromolecule metabolic process;GO:0044283//small molecule biosynthetic process;GO:0044711//single-organism biosynthetic process;GO:0008380//RNA splicing;GO:0046483//heterocycle metabolic process;GO:0006807//nitrogen compound metabolic process;GO:0006139//nucleobase-containing compound …
Unigene0001010	0	0	0	0	0	0	0	0	DNA-directed RNA polymerase subunit beta [Gossypium arboreum]	-	GO:0005623//cell;GO:0044422//organelle part;GO:0044464//cell part;GO:0044425//membrane part;GO:0043227//membrane-bounded organelle;GO:0016020//membrane;GO:0031984//organelle subcompartment;GO:0043226//organelle;GO:0031224//intrinsic component of membrane;GO:0005622//intracellular;GO:0044446//intracellular organelle part;GO:0043231//intracellular membrane-bounded organelle;GO:0043229//intracellula…	-	GO:0006082//organic acid metabolic process;GO:0044711//single-organism biosynthetic process;GO:0044763//single-organism cellular process;GO:0006139//nucleobase-containing compound metabolic process;GO:0043170//macromolecule metabolic process;GO:0016053//organic acid biosynthetic process;GO:0043436//oxoacid metabolic process;GO:0044237//cellular metabolic process;GO:1901566//organonitrogen compoun…
Unigene0001011	2.6648	1.7518	6.62	1.0158	20	12	50	7	--	-	-	-	-
Unigene0001012	1.1432	0.501	2.4992	0.498	5	2	11	2	--	-	-	-	-
Unigene0001013	0.6545	0.9561	1.3008	0	3	4	6	0	--	-	-	-	-
Unigene0001014	2.74	16.1777	7.7145	7.0462	36	194	102	85	PREDICTED: uncharacterized serine-rich protein C215.13-like [Cucumis melo]	-	-	-	-
Unigene0001015	0	0	0.2394	0	0	0	4	0	PREDICTED: LOW QUALITY PROTEIN: probable indole-3-pyruvate monooxygenase YUCCA8 [Cucumis melo]	ko00380//Tryptophan metabolism//Amino acid metabolism//Metabolism	-	GO:0004497//monooxygenase activity;GO:1901265//nucleoside phosphate binding;GO:0003824//catalytic activity;GO:0097159//organic cyclic compound binding;GO:0000166//nucleotide binding;GO:0016491//oxidoreductase activity;GO:1901363//heterocyclic compound binding;GO:0036094//small molecule binding;GO:0016705//oxidoreductase activity, acting on paired donors, with incorporation or reduction of molecul…	GO:0044710//single-organism metabolic process;GO:0008152//metabolic process;GO:0044699//single-organism process
Unigene0001016	1.566	0.9963	1.6816	0.8803	62	36	67	32	PREDICTED: LOW QUALITY PROTEIN: probable indole-3-pyruvate monooxygenase YUCCA8 [Cucumis melo]	ko00380//Tryptophan metabolism//Amino acid metabolism//Metabolism	-	GO:0000166//nucleotide binding;GO:0097159//organic cyclic compound binding;GO:0004497//monooxygenase activity;GO:0036094//small molecule binding;GO:0005488//binding;GO:0016491//oxidoreductase activity;GO:1901265//nucleoside phosphate binding;GO:0016705//oxidoreductase activity, acting on paired donors, with incorporation or reduction of molecular oxygen;GO:0016709//oxidoreductase activity, acting…	GO:0044710//single-organism metabolic process;GO:0044699//single-organism process;GO:0008152//metabolic process
Unigene0001017	0	0	0	0	0	0	0	0	--	-	-	-	-
Unigene0001018	0	0	0	0	0	0	0	0	--	-	-	-	-
Unigene0001019	1.0346	0	0.771	0.5634	4	0	3	2	--	-	-	-	-
Unigene0001020	0.5975	0.4364	0.9895	1.7353	3	2	5	8	Telomere-associated protein RIF1 [Glycine soja]	-	-	-	-
Unigene0001021	2.2956	1.8444	2.5092	2.1668	30	22	33	26	Telomere-associated RIF1 [Gossypium arboreum]	-	-	-	-
Unigene0001022	0.3338	0.7314	3.6484	0.4544	4	8	44	5	PREDICTED: 21 kDa protein-like [Cucumis sativus]	-	-	GO:0030234//enzyme regulator activity;GO:0098772//molecular function regulator;GO:0052689//carboxylic ester hydrolase activity;GO:0003824//catalytic activity;GO:0016788//hydrolase activity, acting on ester bonds;GO:0016787//hydrolase activity	GO:0050789//regulation of biological process;GO:0048519//negative regulation of biological process;GO:0019222//regulation of metabolic process;GO:0065007//biological regulation;GO:0009892//negative regulation of metabolic process
Unigene0001023	0	0	0	0	0	0	0	0	PREDICTED: 21 kDa protein-like [Cucumis sativus]	-	-	GO:0098772//molecular function regulator;GO:0016787//hydrolase activity;GO:0030234//enzyme regulator activity;GO:0016788//hydrolase activity, acting on ester bonds;GO:0003824//catalytic activity;GO:0052689//carboxylic ester hydrolase activity	GO:0065007//biological regulation;GO:0019222//regulation of metabolic process;GO:0050789//regulation of biological process;GO:0009892//negative regulation of metabolic process;GO:0048519//negative regulation of biological process
Unigene0001024	0	0.2834	1.2851	0.5634	0	1	5	2	--	-	-	-	-
Unigene0001025	0.2485	0.5446	0.247	1.0827	1	2	1	4	PREDICTED: uncharacterized protein LOC104237088 [Nicotiana sylvestris]	-	-	-	-
Unigene0001026	0.7655	0.5592	1.0143	0.2779	3	2	4	1	--	-	-	-	-
Unigene0001027	1.2816	0.8425	0.7641	0.2792	5	3	3	1	--	-	-	-	-
Unigene0001028	3.0485	0	0.7573	1.1068	12	0	3	4	--	-	-	-	-
Unigene0001029	1.0253	2.5275	2.7169	1.9542	24	54	64	42	PREDICTED: pentatricopeptide repeat-containing protein At2g34400 [Cucumis sativus]	-	-	-	-
Unigene0001030	0.438	1.4397	0.8705	0.9541	2	6	4	4	--	-	-	-	-
Unigene0001031	1.659	0.8262	0.2997	0	11	5	2	0	--	-	-	-	-
Unigene0001032	2.117	4.1235	2.3374	0.2562	9	16	10	1	--	-	-	-	-
Unigene0001033	1.9526	0.778	0.1764	0	11	4	1	0	PREDICTED: (S)-coclaurine N-methyltransferase [Cucumis sativus]	ko00950//Isoquinoline alkaloid biosynthesis//Biosynthesis of other secondary metabolites//Metabolism	-	GO:0016740//transferase activity;GO:0003824//catalytic activity;GO:0016741//transferase activity, transferring one-carbon groups	GO:0008152//metabolic process;GO:0071704//organic substance metabolic process;GO:0044699//single-organism process;GO:0044710//single-organism metabolic process;GO:0006629//lipid metabolic process;GO:0044238//primary metabolic process
Unigene0001034	0.9941	0.2723	0.9878	0.5413	4	1	4	2	--	-	-	-	-
Unigene0001035	1.3293	0.6473	1.1742	0.3217	9	4	8	2	--	-	-	-	-
Unigene0001036	0	0.4951	0	0	0	4	0	0	--	-	-	-	-
Unigene0001037	0.4266	0.4674	0.7418	1.2776	4	4	7	11	--	-	-	-	-
Unigene0001038	1.0488	1.7237	0.2605	0.5711	4	6	1	2	NADH dehydrogenase subunit 5, partial (mitochondrion) [Lonicera maackii]	ko00190//Oxidative phosphorylation//Energy metabolism//Metabolism	GO:0005623//cell;GO:0044446//intracellular organelle part;GO:0044464//cell part;GO:0044424//intracellular part;GO:0031967//organelle envelope;GO:0005622//intracellular;GO:0044425//membrane part;GO:0044422//organelle part;GO:0031090//organelle membrane;GO:0043229//intracellular organelle;GO:0031975//envelope;GO:0043226//organelle;GO:0016020//membrane;GO:0043231//intracellular membrane-bounded orga…	GO:0003954//NADH dehydrogenase activity;GO:0016655//oxidoreductase activity, acting on NAD(P)H, quinone or similar compound as acceptor;GO:0003824//catalytic activity;GO:0016651//oxidoreductase activity, acting on NAD(P)H;GO:0016491//oxidoreductase activity;GO:0050136//NADH dehydrogenase (quinone) activity	GO:0044699//single-organism process;GO:0022904//respiratory electron transport chain;GO:0044763//single-organism cellular process;GO:0009987//cellular process;GO:0044710//single-organism metabolic process;GO:0015980//energy derivation by oxidation of organic compounds;GO:0045333//cellular respiration;GO:0008152//metabolic process;GO:0006091//generation of precursor metabolites and energy;GO:00229…
Unigene0001039	21.662	23.2949	25.2919	16.4447	703	690	826	490	PREDICTED: alpha-protein kinase 3 [Gossypium raimondii]	-	-	-	-
Unigene0001040	0.3888	2.3432	4.0571	1.694	2	11	21	8	--	-	-	-	-
Unigene0001041	0.1826	0.2001	0.9073	0.9945	1	1	5	5	PREDICTED: uncharacterized protein LOC103490375 [Cucumis melo]	-	-	-	-
Unigene0001042	1.7862	0	1.1833	0.8647	9	0	6	4	--	-	-	-	-
Unigene0001043	1.6122	2.8904	1.8933	1.5963	11	18	13	10	--	-	-	-	-
Unigene0001044	1.2517	1.3714	0.8292	0.2272	6	6	4	1	--	-	-	-	-
Unigene0001045	1.0346	0	0	1.1268	4	0	0	4	--	-	-	-	-
Unigene0001046	1.827	1.0009	0.6484	0.5685	14	7	5	4	ty3-gypsy retrotransposon protein [Cucumis melo subsp. melo]	-	-	-	-
Unigene0001047	0.438	0.2399	0	0	2	1	0	0	--	-	-	-	-
Unigene0001048	0	0	0	0	0	0	0	0	--	-	-	-	-
Unigene0001049	13.0483	18.5638	2.7093	4.8786	134	174	28	46	PREDICTED: uncharacterized protein LOC103497353 [Cucumis melo]	-	-	-	-
Unigene0001050	1.1639	4.8174	3.7267	2.2536	9	34	29	16	PREDICTED: aureusidin synthase-like [Sesamum indicum]	ko00350//Tyrosine metabolism//Amino acid metabolism//Metabolism;ko00950//Isoquinoline alkaloid biosynthesis//Biosynthesis of other secondary metabolites//Metabolism	-	GO:0004097//catechol oxidase activity;GO:0003824//catalytic activity;GO:0016679//oxidoreductase activity, acting on diphenols and related substances as donors;GO:0016491//oxidoreductase activity;GO:0016682//oxidoreductase activity, acting on diphenols and related substances as donors, oxygen as acceptor	GO:0008152//metabolic process
Unigene0001051	1.4847	0	1.4753	0	6	0	6	0	--	-	-	-	-
Unigene0001052	1.579	0.346	0.7845	0	10	2	5	0	--	-	-	-	-
Unigene0001053	30.1229	28.1818	35.3861	43.4539	527	450	623	698	PREDICTED: ras-related protein Rab7 [Cucumis melo]	ko04144//Endocytosis//Transport and catabolism//Cellular Processes;ko04145//Phagosome//Transport and catabolism//Cellular Processes	GO:0005623//cell;GO:0044464//cell part	GO:1901363//heterocyclic compound binding;GO:0017111//nucleoside-triphosphatase activity;GO:0097159//organic cyclic compound binding;GO:0016462//pyrophosphatase activity;GO:0097367//carbohydrate derivative binding;GO:0032549//ribonucleoside binding;GO:0016787//hydrolase activity;GO:0016817//hydrolase activity, acting on acid anhydrides;GO:0036094//small molecule binding;GO:0001882//nucleoside bin…	GO:0051179//localization;GO:0023052//signaling;GO:0050896//response to stimulus;GO:0044699//single-organism process;GO:0016482//cytoplasmic transport;GO:0007154//cell communication;GO:0044700//single organism signaling;GO:0006810//transport;GO:0033036//macromolecule localization;GO:0051234//establishment of localization;GO:0009987//cellular process;GO:0015031//protein transport;GO:0044763//single…
Unigene0001054	4.55	0.6231	2.6846	0.1549	32	4	19	1	--	-	-	-	-
Unigene0001055	1.0664	1.6358	0	0	5	7	0	0	Os01g0116166 [Oryza sativa Japonica Group]	ko02010//ABC transporters//Membrane transport//Environmental Information Processing	GO:0005622//intracellular;GO:0043227//membrane-bounded organelle;GO:0043231//intracellular membrane-bounded organelle;GO:0043226//organelle;GO:0005623//cell;GO:0044464//cell part;GO:0044424//intracellular part;GO:0043229//intracellular organelle	GO:0005488//binding;GO:0043169//cation binding;GO:0046872//metal ion binding;GO:0043167//ion binding	GO:0044238//primary metabolic process;GO:0044237//cellular metabolic process;GO:0008152//metabolic process;GO:0071704//organic substance metabolic process;GO:0009987//cellular process
Unigene0001056	0.5014	0.824	0.7474	0.8191	2	3	3	3	F-box protein [Medicago truncatula]	-	-	-	-
Unigene0001057	1.6788	0.3504	1.271	0.4353	21	4	16	5	Myb/SANT-like DNA-binding domain protein [Medicago truncatula]	-	-	-	-
Unigene0001058	0	1.4867	1.1798	3.1405	0	8	7	17	Protein kinase domain containing protein, expressed [Oryza sativa Japonica Group]	-	-	-	-
Unigene0001059	77.837	49.3575	28.7625	32.671	3625	2098	1348	1397	transketolase [Cucumis sativus]	ko01200//Carbon metabolism//Global and Overview//Metabolism;ko01230//Biosynthesis of amino acids//Global and Overview//Metabolism;ko00710//Carbon fixation in photosynthetic organisms//Energy metabolism//Metabolism;ko00030//Pentose phosphate pathway//Carbohydrate metabolism//Metabolism	-	GO:0016740//transferase activity;GO:0003824//catalytic activity;GO:0016744//transferase activity, transferring aldehyde or ketonic groups	-
Unigene0001060	0.7866	1.1491	0.5211	0	3	4	2	0	--	-	-	-	-
Unigene0001061	1.3276	0.4848	3.2247	5.0607	18	6	44	63	PREDICTED: protein CHROMATIN REMODELING 25 [Cucumis sativus]	ko03440//Homologous recombination//Replication and repair//Genetic Information Processing	-	GO:0003824//catalytic activity;GO:0097367//carbohydrate derivative binding;GO:0097159//organic cyclic compound binding;GO:0032550//purine ribonucleoside binding;GO:0036094//small molecule binding;GO:1901363//heterocyclic compound binding;GO:0016787//hydrolase activity;GO:0032549//ribonucleoside binding;GO:0016817//hydrolase activity, acting on acid anhydrides;GO:0005488//binding;GO:0017111//nucle…	GO:0044699//single-organism process;GO:2001141//regulation of RNA biosynthetic process;GO:1903046//meiotic cell cycle process;GO:0060255//regulation of macromolecule metabolic process;GO:0003006//developmental process involved in reproduction;GO:0000725//recombinational repair;GO:0044237//cellular metabolic process;GO:0044238//primary metabolic process;GO:0006950//response to stress;GO:0009889//r…
Unigene0001062	5.4889	3.8435	1.3944	0.1798	133	85	34	4	PREDICTED: ABC transporter G family member 26 [Cucumis melo]	-	GO:0031224//intrinsic component of membrane;GO:0044425//membrane part;GO:0016020//membrane	GO:0001883//purine nucleoside binding;GO:0016787//hydrolase activity;GO:1901363//heterocyclic compound binding;GO:0097159//organic cyclic compound binding;GO:0016818//hydrolase activity, acting on acid anhydrides, in phosphorus-containing anhydrides;GO:0001882//nucleoside binding;GO:0016817//hydrolase activity, acting on acid anhydrides;GO:0032550//purine ribonucleoside binding;GO:0097367//carboh…	GO:0032989//cellular component morphogenesis;GO:0010208//pollen wall assembly;GO:0044699//single-organism process;GO:0043062//extracellular structure organization;GO:0051179//localization;GO:0048856//anatomical structure development;GO:0044707//single-multicellular organism process;GO:0007275//multicellular organismal development;GO:0009555//pollen development;GO:0044767//single-organism developm…
Unigene0001063	1.1045	0.3025	0.2744	0.3007	4	1	1	1	Os01g0159600 [Oryza sativa Japonica Group]	-	-	-	-
Unigene0001064	3.0756	2.6958	3.7145	4.4836	65	52	79	87	PREDICTED: histone-lysine N-methyltransferase ATXR6 [Cucumis melo]	-	GO:0005622//intracellular;GO:0043226//organelle;GO:0044464//cell part;GO:0044424//intracellular part;GO:0043231//intracellular membrane-bounded organelle;GO:0043229//intracellular organelle;GO:0005623//cell;GO:0043227//membrane-bounded organelle	GO:0008170//N-methyltransferase activity;GO:0016279//protein-lysine N-methyltransferase activity;GO:0042054//histone methyltransferase activity;GO:0016741//transferase activity, transferring one-carbon groups;GO:0008757//S-adenosylmethionine-dependent methyltransferase activity;GO:0003824//catalytic activity;GO:0043169//cation binding;GO:0016740//transferase activity;GO:0008168//methyltransferase…	GO:0008213//protein alkylation;GO:0043414//macromolecule methylation;GO:0018205//peptidyl-lysine modification;GO:0044249//cellular biosynthetic process;GO:0009058//biosynthetic process;GO:0050794//regulation of cellular process;GO:0016043//cellular component organization;GO:0044238//primary metabolic process;GO:0048285//organelle fission;GO:1902410//mitotic cytokinetic process;GO:0018022//peptidy…
Unigene0001065	12.7696	3.5533	6.2439	2.8699	126	32	62	26	PREDICTED: uncharacterized serine-rich protein C215.13 [Prunus mume]	-	-	-	-
Unigene0001066	3.8972	0.7117	2.9045	1.0612	24	4	18	6	--	-	-	-	-
Unigene0001067	0	0.2645	0	0	0	4	0	0	PREDICTED: protein YLS9-like [Cucumis sativus]	-	-	-	GO:0044763//single-organism cellular process;GO:0001101//response to acid chemical;GO:0002376//immune system process;GO:0071229//cellular response to acid chemical;GO:0006952//defense response;GO:0006950//response to stress;GO:0043207//response to external biotic stimulus;GO:0065007//biological regulation;GO:0044700//single organism signaling;GO:0023052//signaling;GO:0007165//signal transduction;…
Unigene0001068	0	0	0	0	0	0	0	0	PREDICTED: protein YLS9-like [Cucumis sativus]	-	-	-	GO:0010941//regulation of cell death;GO:0070887//cellular response to chemical stimulus;GO:0050896//response to stimulus;GO:0043067//regulation of programmed cell death;GO:0042221//response to chemical;GO:0044237//cellular metabolic process;GO:0071310//cellular response to organic substance;GO:0044699//single-organism process;GO:0065007//biological regulation;GO:0002376//immune system process;GO:…
Unigene0001069	2.1524	0	0.9506	0	9	0	4	0	--	-	-	-	-
Unigene0001070	1.7062	4.2062	1.0597	0.4646	16	36	10	4	PREDICTED: GDSL esterase/lipase At1g71691-like [Cucumis sativus]	-	-	GO:0016787//hydrolase activity;GO:0003824//catalytic activity	GO:0008152//metabolic process;GO:0044699//single-organism process;GO:0044238//primary metabolic process;GO:0006629//lipid metabolic process;GO:0044710//single-organism metabolic process;GO:0071704//organic substance metabolic process
Unigene0001071	1.0759	0.7368	2.1383	1.7578	8	5	16	12	PREDICTED: GDSL esterase/lipase At1g71691-like [Cucumis sativus]	-	-	GO:0016787//hydrolase activity;GO:0003824//catalytic activity	GO:0044238//primary metabolic process;GO:0006629//lipid metabolic process;GO:0008152//metabolic process;GO:0071704//organic substance metabolic process;GO:0044710//single-organism metabolic process;GO:0044699//single-organism process
Unigene0001072	31.8952	31.8835	49.5566	62.2549	582	531	910	1043	nicotiana lesion-inducing like precursor [Zea mays]	-	-	-	-
Unigene0001073	2.5566	1.2005	1.8147	0	14	6	10	0	--	-	-	-	-
Unigene0001074	2.8171	1.6926	4.2442	2.5733	31	17	47	26	NFU1 iron-sulfur cluster, mitochondrial [Gossypium arboreum]	-	-	-	GO:0050896//response to stimulus
Unigene0001075	4.5167	0.5119	1.2381	0	29	3	8	0	--	-	-	-	-
Unigene0001076	2.4852	1.2567	0.3799	0.8328	13	6	2	4	--	-	-	-	-
Unigene0001077	1.0393	0.6832	1.8589	0.6791	5	3	9	3	--	-	-	-	-
Unigene0001078	1.0836	0.8904	1.0768	1.1802	4	3	4	4	--	-	-	-	-
Unigene0001079	2.8111	0.5133	0.9311	0.1701	18	3	6	1	--	-	-	-	-
Unigene0001080	1.4214	1.6685	3.8337	0.6635	14	15	38	6	--	-	-	-	-
Unigene0001081	1.8178	0.8852	0	1.3199	9	4	0	6	--	-	-	-	-
Unigene0001082	1.1386	0	2.2629	0	5	0	10	0	--	-	-	-	-
Unigene0001083	0	0	0	0	0	0	0	0	PREDICTED: arogenate dehydrogenase 1, chloroplastic [Cucumis sativus]	ko01230//Biosynthesis of amino acids//Global and Overview//Metabolism;ko00400//Phenylalanine, tyrosine and tryptophan biosynthesis//Amino acid metabolism//Metabolism	GO:0005623//cell;GO:0043231//intracellular membrane-bounded organelle;GO:0043227//membrane-bounded organelle;GO:0043226//organelle;GO:0009536//plastid;GO:0044464//cell part;GO:0043229//intracellular organelle;GO:0005737//cytoplasm;GO:0044444//cytoplasmic part;GO:0005622//intracellular;GO:0044424//intracellular part	GO:0016628//oxidoreductase activity, acting on the CH-CH group of donors, NAD or NADP as acceptor;GO:0016491//oxidoreductase activity;GO:0016627//oxidoreductase activity, acting on the CH-CH group of donors;GO:0003824//catalytic activity	GO:0006807//nitrogen compound metabolic process;GO:0009066//aspartate family amino acid metabolic process;GO:0006566//threonine metabolic process;GO:0006570//tyrosine metabolic process;GO:0071704//organic substance metabolic process;GO:0043436//oxoacid metabolic process;GO:0009058//biosynthetic process;GO:0044249//cellular biosynthetic process;GO:0044763//single-organism cellular process;GO:19015…
Unigene0001084	15.3273	10.8756	11.7495	13.5593	735	476	567	597	PREDICTED: arogenate dehydrogenase 1, chloroplastic [Cucumis sativus]	ko01230//Biosynthesis of amino acids//Global and Overview//Metabolism;ko00400//Phenylalanine, tyrosine and tryptophan biosynthesis//Amino acid metabolism//Metabolism	GO:0043229//intracellular organelle;GO:0043226//organelle;GO:0009536//plastid;GO:0044444//cytoplasmic part;GO:0005622//intracellular;GO:0043227//membrane-bounded organelle;GO:0044424//intracellular part;GO:0044464//cell part;GO:0005623//cell;GO:0005737//cytoplasm;GO:0043231//intracellular membrane-bounded organelle	GO:0003824//catalytic activity;GO:0016628//oxidoreductase activity, acting on the CH-CH group of donors, NAD or NADP as acceptor;GO:0016627//oxidoreductase activity, acting on the CH-CH group of donors;GO:0016491//oxidoreductase activity	GO:0019752//carboxylic acid metabolic process;GO:0008652//cellular amino acid biosynthetic process;GO:0009987//cellular process;GO:0044763//single-organism cellular process;GO:0006725//cellular aromatic compound metabolic process;GO:0009058//biosynthetic process;GO:0006570//tyrosine metabolic process;GO:0006807//nitrogen compound metabolic process;GO:1901576//organic substance biosynthetic proces…
Unigene0001085	0	1.9725	1.3417	0	0	8	6	0	--	-	-	-	-
Unigene0001086	1.0836	0.8904	2.0189	0.1475	8	6	15	1	--	-	-	-	-
Unigene0001087	2.2174	1.3497	0.4897	1.61	9	5	2	6	--	-	-	-	-
Unigene0001088	0.6281	1.7205	0.4681	0.5131	4	10	3	3	--	-	-	-	-
Unigene0001089	1.2426	1.6337	0.9878	0.812	5	6	4	3	--	-	-	-	-
Unigene0001090	0.9843	3.1583	1.6069	0.6126	14	41	23	8	Protein TRANSPARENT TESTA 12 [Glycine soja]	-	GO:0031224//intrinsic component of membrane;GO:0016020//membrane;GO:0044425//membrane part	GO:0022804//active transmembrane transporter activity;GO:0005215//transporter activity;GO:0015291//secondary active transmembrane transporter activity;GO:0022857//transmembrane transporter activity	GO:0050896//response to stimulus;GO:0051234//establishment of localization;GO:0044699//single-organism process;GO:0015893//drug transport;GO:0042221//response to chemical;GO:0044765//single-organism transport;GO:0009987//cellular process;GO:1902578//single-organism localization;GO:0051179//localization;GO:0044763//single-organism cellular process;GO:0042493//response to drug;GO:0006810//transport
Unigene0001091	1.2205	0	1.4149	0	6	0	7	0	--	-	-	-	-
Unigene0001092	0.8195	0.2245	2.443	0.8925	4	1	12	4	PREDICTED: clavaminate synthase-like protein At3g21360 [Cucumis sativus]	-	-	GO:0003824//catalytic activity	GO:0044710//single-organism metabolic process;GO:0044699//single-organism process;GO:0008152//metabolic process
Unigene0001093	1.0585	0	0.5259	0.5764	4	0	2	2	--	-	-	-	-
Unigene0001094	1.41	0.9507	0.2156	1.6538	13	8	2	14	--	-	-	-	-
Unigene0001095	0	0	0	0	0	0	0	0	PREDICTED: cysteine-rich repeat secretory protein 38-like [Cucumis sativus]	-	-	-	-
Unigene0001096	0	0	0	0	0	0	0	0	PREDICTED: cysteine-rich repeat secretory protein 38-like [Cucumis sativus]	-	-	-	-
Unigene0001097	0	0	0.3021	0	0	0	4	0	PREDICTED: phosphatidylinositol 4-phosphate 5-kinase 10 isoform X3 [Cucumis sativus]	ko04144//Endocytosis//Transport and catabolism//Cellular Processes;ko00562//Inositol phosphate metabolism//Carbohydrate metabolism//Metabolism;ko04070//Phosphatidylinositol signaling system//Signal transduction//Environmental Information Processing	-	GO:0016301//kinase activity;GO:0016740//transferase activity;GO:0003824//catalytic activity;GO:0016772//transferase activity, transferring phosphorus-containing groups	GO:0006629//lipid metabolic process;GO:0044710//single-organism metabolic process;GO:0044237//cellular metabolic process;GO:0006793//phosphorus metabolic process;GO:0008152//metabolic process;GO:0046486//glycerolipid metabolic process;GO:0019637//organophosphate metabolic process;GO:0009987//cellular process;GO:0044238//primary metabolic process;GO:0006650//glycerophospholipid metabolic process;G…
Unigene0001098	0.8563	2.4042	1.2764	0.9327	16	41	24	16	PREDICTED: phosphatidylinositol 4-phosphate 5-kinase 10 isoform X3 [Cucumis sativus]	ko04144//Endocytosis//Transport and catabolism//Cellular Processes;ko00562//Inositol phosphate metabolism//Carbohydrate metabolism//Metabolism;ko04070//Phosphatidylinositol signaling system//Signal transduction//Environmental Information Processing	-	GO:0016307//phosphatidylinositol phosphate kinase activity;GO:0016773//phosphotransferase activity, alcohol group as acceptor;GO:0016740//transferase activity;GO:0016772//transferase activity, transferring phosphorus-containing groups;GO:1901363//heterocyclic compound binding;GO:0016301//kinase activity;GO:0036094//small molecule binding;GO:0005488//binding;GO:0097159//organic cyclic compound bin…	GO:0044710//single-organism metabolic process;GO:0006644//phospholipid metabolic process;GO:0044699//single-organism process;GO:0044763//single-organism cellular process;GO:0019637//organophosphate metabolic process;GO:0006650//glycerophospholipid metabolic process;GO:0008152//metabolic process;GO:0046486//glycerolipid metabolic process;GO:0006629//lipid metabolic process;GO:0044255//cellular lip…
Unigene0001099	1.0675	2.7645	0.2893	0	11	26	3	0	Geranylgeranyl pyrophosphate synthase 1 [Theobroma cacao]	ko00900//Terpenoid backbone biosynthesis//Metabolism of terpenoids and polyketides//Metabolism	-	GO:0016628//oxidoreductase activity, acting on the CH-CH group of donors, NAD or NADP as acceptor;GO:0003824//catalytic activity;GO:0016491//oxidoreductase activity;GO:0016627//oxidoreductase activity, acting on the CH-CH group of donors	GO:0044710//single-organism metabolic process;GO:0044763//single-organism cellular process;GO:0006629//lipid metabolic process;GO:0009987//cellular process;GO:0044255//cellular lipid metabolic process;GO:0008152//metabolic process;GO:0044238//primary metabolic process;GO:0006720//isoprenoid metabolic process;GO:0044237//cellular metabolic process;GO:0044699//single-organism process;GO:0071704//or…
Unigene0001100	0	1.9836	0	0	0	7	0	0	--	-	-	-	-
Unigene0001101	2.3201	0.4622	0.4192	0.2297	11	2	2	1	--	-	-	-	-
Unigene0001102	1.4808	0.4867	0.7357	0	10	3	5	0	--	-	-	-	-
Unigene0001103	3.2466	5.9285	0.4888	1.5001	33	55	5	14	PREDICTED: ethylene-responsive transcription factor ERF011-like [Cucumis sativus]	-	-	GO:0097159//organic cyclic compound binding;GO:0005488//binding;GO:1901363//heterocyclic compound binding;GO:0001071//nucleic acid binding transcription factor activity;GO:0003676//nucleic acid binding	GO:0044237//cellular metabolic process;GO:0043170//macromolecule metabolic process;GO:0044249//cellular biosynthetic process;GO:0060255//regulation of macromolecule metabolic process;GO:0019222//regulation of metabolic process;GO:0065007//biological regulation;GO:0010468//regulation of gene expression;GO:0008152//metabolic process;GO:1901576//organic substance biosynthetic process;GO:0034645//cel…
Unigene0001104	1.8178	1.7703	0.2007	0	9	8	1	0	--	-	-	-	-
Unigene0001105	2.156	2.0165	1.6199	1.1454	41	35	31	20	--	-	-	-	-
Unigene0001106	2.205	1.8583	1.0113	2.2168	26	20	12	24	hypothetical protein L484_022412 [Morus notabilis]	-	-	-	-
Unigene0001107	1.7862	0.5592	0.5071	1.1117	7	2	2	4	--	-	-	-	-
Unigene0001108	2.6463	6.3786	0	0	15	33	0	0	--	-	-	-	-
Unigene0001109	2.5033	1.0666	0.4146	2.575	18	7	3	17	PREDICTED: dirigent protein 15-like [Cucumis melo]	-	-	-	-
Unigene0001110	11.8012	20.7153	5.879	3.3412	377	604	189	98	PREDICTED: 4-coumarate--CoA ligase-like 10 [Cucumis melo]	-	-	GO:0016877//ligase activity, forming carbon-sulfur bonds;GO:0016405//CoA-ligase activity;GO:0003824//catalytic activity;GO:0016874//ligase activity	-
Unigene0001111	0	0	0.2819	0.1545	0	0	2	1	PREDICTED: oxalate--CoA ligase-like [Cucumis sativus]	-	GO:0005911//cell-cell junction;GO:0009536//plastid;GO:0044424//intracellular part;GO:0044464//cell part;GO:0005622//intracellular;GO:0043226//organelle;GO:0044435//plastid part;GO:0009532//plastid stroma;GO:0043227//membrane-bounded organelle;GO:0005737//cytoplasm;GO:0005623//cell;GO:0044422//organelle part;GO:0044444//cytoplasmic part;GO:0030054//cell junction;GO:0005576//extracellular region;GO…	GO:0032550//purine ribonucleoside binding;GO:0097367//carbohydrate derivative binding;GO:0097159//organic cyclic compound binding;GO:0005488//binding;GO:0016877//ligase activity, forming carbon-sulfur bonds;GO:0001882//nucleoside binding;GO:0003824//catalytic activity;GO:0016878//acid-thiol ligase activity;GO:0032549//ribonucleoside binding;GO:1901363//heterocyclic compound binding;GO:0016874//li…	GO:0071704//organic substance metabolic process;GO:1901360//organic cyclic compound metabolic process;GO:0043436//oxoacid metabolic process;GO:0043648//dicarboxylic acid metabolic process;GO:0051707//response to other organism;GO:0009072//aromatic amino acid family metabolic process;GO:0022414//reproductive process;GO:0003006//developmental process involved in reproduction;GO:0051234//establishme…
Unigene0001112	0.3748	1.0267	0.9311	0	2	5	5	0	--	-	-	-	-
Unigene0001113	1.9613	0	0	0	7	0	0	0	--	-	-	-	-
Unigene0001114	1.7696	1.5511	1.5826	1.1564	10	8	9	6	--	-	-	-	-
Unigene0001115	0	0	0	0	0	0	0	0	PREDICTED: transcriptional activator Myb-like [Cucumis melo]	-	-	GO:0003676//nucleic acid binding;GO:1901363//heterocyclic compound binding;GO:0005488//binding;GO:0097159//organic cyclic compound binding	-
Unigene0001116	0	0	0	0	0	0	0	0	PREDICTED: transcriptional activator Myb-like [Cucumis melo]	-	-	GO:0003676//nucleic acid binding;GO:1901363//heterocyclic compound binding;GO:0097159//organic cyclic compound binding;GO:0005488//binding	-
Unigene0001117	2.2117	9.0872	49.8627	64.4379	32	120	726	856	PREDICTED: indole-3-acetic acid-induced protein ARG7-like [Cucumis sativus]	ko04075//Plant hormone signal transduction//Signal transduction//Environmental Information Processing	-	-	-
Unigene0001118	1.1713	0	1.1639	0	5	0	5	0	--	-	-	-	-
Unigene0001119	3.534	0.8417	0.4581	0	23	5	3	0	--	-	-	-	-
Unigene0001120	0	2.0284	0.23	0	0	8	1	0	RNA-directed DNA polymerase , related [Medicago truncatula]	-	-	-	-
Unigene0001121	3.4853	0.5092	0	0	15	2	0	0	--	-	-	-	-
Unigene0001122	1.0867	1.6669	1.7277	0.4734	5	7	8	2	--	-	-	-	-
Unigene0001123	1.6878	0.3698	1.6772	0.9804	15	3	15	8	--	-	-	-	-
Unigene0001124	0.2735	1.1986	0.5435	0	1	4	2	0	--	-	-	-	-
Unigene0001125	0.9813	0.2688	0.4875	0.2672	4	1	2	1	--	-	-	-	-
Unigene0001126	1.934	4.9442	0.4271	0.117	36	84	8	2	PREDICTED: ABC transporter G family member 28-like, partial [Nelumbo nucifera]	-	GO:0031224//intrinsic component of membrane;GO:0016020//membrane;GO:0044425//membrane part	GO:0016820//hydrolase activity, acting on acid anhydrides, catalyzing transmembrane movement of substances;GO:0015405//P-P-bond-hydrolysis-driven transmembrane transporter activity;GO:0005488//binding;GO:1901363//heterocyclic compound binding;GO:0001883//purine nucleoside binding;GO:0003824//catalytic activity;GO:0017111//nucleoside-triphosphatase activity;GO:0097367//carbohydrate derivative bind…	GO:0051179//localization;GO:0044699//single-organism process;GO:0015893//drug transport;GO:0051234//establishment of localization;GO:0042221//response to chemical;GO:0044765//single-organism transport;GO:0006810//transport;GO:1902578//single-organism localization;GO:0042493//response to drug;GO:0050896//response to stimulus
Unigene0001127	0.4282	0	1.2764	0	2	0	6	0	PREDICTED: ethylene-responsive transcription factor CRF6-like [Cucumis melo]	-	GO:0043227//membrane-bounded organelle;GO:0044464//cell part;GO:0005622//intracellular;GO:0005623//cell;GO:0043226//organelle;GO:0043231//intracellular membrane-bounded organelle;GO:0044424//intracellular part;GO:0043229//intracellular organelle	GO:0003676//nucleic acid binding;GO:0001071//nucleic acid binding transcription factor activity;GO:0097159//organic cyclic compound binding;GO:0005488//binding;GO:1901363//heterocyclic compound binding	GO:0043170//macromolecule metabolic process;GO:0065007//biological regulation;GO:0009059//macromolecule biosynthetic process;GO:0008152//metabolic process;GO:0019222//regulation of metabolic process;GO:0044260//cellular macromolecule metabolic process;GO:0044249//cellular biosynthetic process;GO:0050789//regulation of biological process;GO:0009058//biosynthetic process;GO:1901576//organic substan…
Unigene0001128	0	0.2213	0	0	0	1	0	0	unknow protein [Oryza sativa Japonica Group]	-	-	-	-
Unigene0001129	0	0	0	0	0	0	0	0	unknow protein [Oryza sativa Japonica Group]	-	-	-	-
Unigene0001130	0.547	1.7979	0.8153	0	2	6	3	0	--	-	-	-	-
Unigene0001131	0	0	0.3917	0	0	0	2	0	PREDICTED: MLP-like protein 328 [Cucumis melo]	-	-	-	GO:0050896//response to stimulus;GO:0006950//response to stress
Unigene0001132	1.2562	0.5506	2.247	1.6419	10	4	18	12	PREDICTED: MLP-like protein 328 [Cucumis melo]	-	-	-	GO:0050896//response to stimulus
Unigene0001133	0	0	0.4386	0	0	0	2	0	PREDICTED: MLP-like protein 328 [Cucumis melo]	-	-	-	GO:0050896//response to stimulus
Unigene0001134	4.2278	2.4087	0	0	25	13	0	0	PREDICTED: LOW QUALITY PROTEIN: disease resistance protein At4g27190-like [Cucumis sativus]	-	-	-	-
Unigene0001135	3.0506	1.4073	0.6382	0.5246	19	8	4	3	PREDICTED: LRR receptor-like serine/threonine-protein kinase FLS2 [Cucumis melo]	-	-	-	-
Unigene0001136	2.397	1.6162	1.649	0.8033	13	8	9	4	PREDICTED: DNA polymerase epsilon catalytic subunit A-like [Cucumis sativus]	ko00230//Purine metabolism//Nucleotide metabolism//Metabolism;ko00240//Pyrimidine metabolism//Nucleotide metabolism//Metabolism;ko03420//Nucleotide excision repair//Replication and repair//Genetic Information Processing;ko03030//DNA replication//Replication and repair//Genetic Information Processing;ko03410//Base excision repair//Replication and repair//Genetic Information Processing	GO:0044424//intracellular part;GO:0044464//cell part;GO:0044446//intracellular organelle part;GO:0000109//nucleotide-excision repair complex;GO:0043229//intracellular organelle;GO:0044428//nuclear part;GO:0044422//organelle part;GO:0005634//nucleus;GO:0043231//intracellular membrane-bounded organelle;GO:0005623//cell;GO:0043227//membrane-bounded organelle;GO:1990391//DNA repair complex;GO:0032991…	GO:0043169//cation binding;GO:0016740//transferase activity;GO:0097159//organic cyclic compound binding;GO:0043167//ion binding;GO:0046914//transition metal ion binding;GO:0034061//DNA polymerase activity;GO:0003824//catalytic activity;GO:0005488//binding;GO:1901363//heterocyclic compound binding;GO:0003676//nucleic acid binding;GO:0016779//nucleotidyltransferase activity;GO:0016772//transferase …	GO:0006259//DNA metabolic process;GO:0046483//heterocycle metabolic process;GO:0006139//nucleobase-containing compound metabolic process;GO:0043170//macromolecule metabolic process;GO:0034641//cellular nitrogen compound metabolic process;GO:0044260//cellular macromolecule metabolic process;GO:0044238//primary metabolic process;GO:1901360//organic cyclic compound metabolic process;GO:0009987//cell…
Unigene0001137	0.7794	1.1387	0.2582	0	3	4	1	0	--	-	-	-	-
Unigene0001138	97.7784	94.5713	78.5103	73.1474	1271	1122	1027	873	PREDICTED: NADH dehydrogenase [ubiquinone] 1 beta subcomplex subunit 8, mitochondrial [Cucumis sativus]	-	GO:0031090//organelle membrane;GO:0005623//cell;GO:0044464//cell part;GO:0044424//intracellular part;GO:0044422//organelle part;GO:0031224//intrinsic component of membrane;GO:0005737//cytoplasm;GO:0044455//mitochondrial membrane part;GO:0044444//cytoplasmic part;GO:0031966//mitochondrial membrane;GO:0016020//membrane;GO:0043229//intracellular organelle;GO:0044425//membrane part;GO:0005739//mitoch…	-	GO:1901575//organic substance catabolic process;GO:0043623//cellular protein complex assembly;GO:0019538//protein metabolic process;GO:0009058//biosynthetic process;GO:0044267//cellular protein metabolic process;GO:0043170//macromolecule metabolic process;GO:0044085//cellular component biogenesis;GO:0044237//cellular metabolic process;GO:0071822//protein complex subunit organization;GO:0044249//c…
Unigene0001139	3.7017	1.7893	2.9211	1.0672	34	15	27	9	PREDICTED: CASP-like protein 5 [Cucumis melo]	-	GO:0016020//membrane	-	-
Unigene0001140	0.5496	0	1.0923	0	2	0	4	0	PREDICTED: retrovirus-related Pol polyprotein from transposon TNT 1-94 isoform X6 [Tarenaya hassleriana]	-	-	-	-
Unigene0001141	0.7281	1.5956	0.5427	0	4	8	3	0	PREDICTED: cytochrome P450 78A5 [Cucumis sativus]	ko00945//Stilbenoid, diarylheptanoid and gingerol biosynthesis//Biosynthesis of other secondary metabolites//Metabolism;ko00903//Limonene and pinene degradation//Metabolism of terpenoids and polyketides//Metabolism	GO:0044424//intracellular part;GO:0044464//cell part;GO:0043231//intracellular membrane-bounded organelle;GO:0031224//intrinsic component of membrane;GO:0043226//organelle;GO:0005623//cell;GO:0016020//membrane;GO:0043227//membrane-bounded organelle;GO:0005622//intracellular;GO:0044425//membrane part;GO:0043229//intracellular organelle	GO:0004497//monooxygenase activity;GO:0016705//oxidoreductase activity, acting on paired donors, with incorporation or reduction of molecular oxygen;GO:0097159//organic cyclic compound binding;GO:0046906//tetrapyrrole binding;GO:0003824//catalytic activity;GO:0016709//oxidoreductase activity, acting on paired donors, with incorporation or reduction of molecular oxygen, NAD(P)H as one donor, and i…	GO:0048646//anatomical structure formation involved in morphogenesis;GO:0009887//organ morphogenesis;GO:0045927//positive regulation of growth;GO:0044767//single-organism developmental process;GO:0044699//single-organism process;GO:0032501//multicellular organismal process;GO:0050789//regulation of biological process;GO:0065007//biological regulation;GO:0044707//single-multicellular organism proc…
Unigene0001142	7.4603	3.3056	1.4173	0.2987	136	55	26	5	--	-	-	-	-
Unigene0001143	1.0664	0.5842	1.9074	1.8584	10	5	18	16	hypothetical protein CISIN_1g033549mg [Citrus sinensis]	ko03010//Ribosome//Translation//Genetic Information Processing	-	-	-
Unigene0001144	1.2609	1.1512	1.2529	0.3433	12	10	12	3	--	-	-	-	-
Unigene0001145	1.3397	0.9785	0.5917	0	9	6	4	0	--	-	-	-	-
Unigene0001146	0.2518	1.3794	0.5004	0.2743	1	5	2	1	--	-	-	-	-
Unigene0001147	2.6689	0.731	1.3261	0	12	3	6	0	--	-	-	-	-
Unigene0001148	0.8693	1.905	0.6479	0.2367	4	8	3	1	--	-	-	-	-
Unigene0001149	2.0958	0	0.1893	0	11	0	1	0	hypothetical protein VITISV_029474 [Vitis vinifera]	-	-	-	-
Unigene0001150	0	3.6704	0.2081	0.4561	0	16	1	2	--	-	-	-	-
Unigene0001151	0	0.2834	1.2851	0.5634	0	1	5	2	BnaC04g10900D [Brassica napus]	-	-	-	-
Unigene0001152	1.752	0.9598	1.0881	0	8	4	5	0	--	-	-	-	-
Unigene0001153	1.4993	0.2053	0.9311	0.2041	8	1	5	1	--	-	-	-	-
Unigene0001154	0.3888	1.0651	2.3183	1.694	2	5	12	8	--	-	-	-	-
Unigene0001155	0.2242	0	1.5592	0.9765	1	0	7	4	--	-	-	-	-
Unigene0001156	18.842	11.8833	27.2197	42.9404	238	137	346	498	PREDICTED: 54S ribosomal protein L19, mitochondrial [Cucumis melo]	ko03010//Ribosome//Translation//Genetic Information Processing	GO:0044464//cell part;GO:0005623//cell;GO:0032991//macromolecular complex;GO:0005622//intracellular;GO:0030529//ribonucleoprotein complex;GO:0044424//intracellular part	GO:0005198//structural molecule activity	GO:0071702//organic substance transport;GO:0070727//cellular macromolecule localization;GO:0006725//cellular aromatic compound metabolic process;GO:0016070//RNA metabolic process;GO:0044249//cellular biosynthetic process;GO:0015031//protein transport;GO:0008152//metabolic process;GO:0033036//macromolecule localization;GO:0008104//protein localization;GO:0006139//nucleobase-containing compound met…
Unigene0001157	1.2991	0.6326	1.5778	0.4716	9	4	11	3	--	-	-	-	-
Unigene0001158	1.3449	0	0.4455	0	6	0	2	0	--	-	-	-	-
Unigene0001159	1.3674	0.8989	0.8153	0	5	3	3	0	--	-	-	-	-
Unigene0001160	1.5227	2.1009	3.3346	2.5492	54	68	119	83	Ankyrin repeat-containing protein [Morus notabilis]	-	-	-	-
Unigene0001161	1.6101	0.8821	0.48	0	10	5	3	0	--	-	-	-	-
Unigene0001162	1.1099	0	1.1029	0	4	0	4	0	--	-	-	-	-
Unigene0001163	177.443	43.4735	189.631	124.812	2558	572	2751	1652	PREDICTED: ARGOS-like protein [Cucumis melo]	-	-	-	-
Unigene0001164	35.5255	33.7495	37.9755	42.1611	647	561	696	705	PREDICTED: vacuolar protein sorting-associated protein 2 homolog 2 [Cucumis sativus]	ko04144//Endocytosis//Transport and catabolism//Cellular Processes	GO:0005768//endosome;GO:0044464//cell part;GO:0044422//organelle part;GO:0043231//intracellular membrane-bounded organelle;GO:0005737//cytoplasm;GO:0005622//intracellular;GO:0043229//intracellular organelle;GO:0044424//intracellular part;GO:0043226//organelle;GO:0036452//ESCRT complex;GO:0043234//protein complex;GO:0044444//cytoplasmic part;GO:0005623//cell;GO:0043227//membrane-bounded organelle;…	-	GO:0018022//peptidyl-lysine methylation;GO:0006464//cellular protein modification process;GO:0051179//localization;GO:0032259//methylation;GO:1903047//mitotic cell cycle process;GO:0016568//chromatin modification;GO:0033036//macromolecule localization;GO:0061640//cytoskeleton-dependent cytokinesis;GO:1902589//single-organism organelle organization;GO:0019538//protein metabolic process;GO:0043414/…
Unigene0001165	0.7028	0.5133	0.4656	0	3	2	2	0	--	-	-	-	-
Unigene0001166	1.305	0.286	0.5187	0.2843	5	1	2	1	--	-	-	-	-
Unigene0001167	0	1.5527	0	0	0	6	0	0	--	-	-	-	-
Unigene0001168	2.7405	1.5013	0.5836	0.4264	14	7	3	2	--	-	-	-	-
Unigene0001169	2.444	2.2459	1.9586	0.1717	31	26	25	2	--	-	-	-	-
Unigene0001170	1.8364	0.2515	0	0	8	1	0	0	--	-	-	-	-
Unigene0001171	0.547	0	1.6306	0	2	0	6	0	--	-	-	-	-
Unigene0001172	3.4125	1.8694	0.8478	0.1549	24	12	6	1	--	-	-	-	-
Unigene0001173	2.7619	1.3157	0	0.2616	23	10	0	2	PREDICTED: phospholipid-transporting ATPase 10-like [Brassica rapa]	-	-	-	-
Unigene0001174	0.4885	0.5353	0.4855	1.951	3	3	3	11	PREDICTED: probable leucine-rich repeat receptor-like protein kinase At1g35710 [Cucumis sativus]	-	-	GO:0016628//oxidoreductase activity, acting on the CH-CH group of donors, NAD or NADP as acceptor;GO:0016740//transferase activity;GO:0016772//transferase activity, transferring phosphorus-containing groups;GO:0016491//oxidoreductase activity;GO:0003824//catalytic activity;GO:0016627//oxidoreductase activity, acting on the CH-CH group of donors	GO:0006793//phosphorus metabolic process;GO:0044237//cellular metabolic process;GO:0008152//metabolic process;GO:0044710//single-organism metabolic process;GO:0044699//single-organism process;GO:0006796//phosphate-containing compound metabolic process;GO:0009987//cellular process
Unigene0001175	0.2575	0.5642	0.2559	1.963	1	2	1	7	PREDICTED: uncharacterized protein LOC105435703 [Cucumis sativus]	-	-	-	-
Unigene0001176	1.3427	1.2609	0.3812	2.0891	7	6	2	10	PREDICTED: protein AF-9 isoform X2 [Populus euphratica]	-	-	-	-
Unigene0001177	0.984	2.0581	2.7555	0.4871	11	21	31	5	PLATZ transcription factor family protein isoform 1 [Theobroma cacao]	-	-	-	-
Unigene0001178	0	0	0.7781	0	0	0	4	0	PLATZ transcription factor family protein isoform 1 [Theobroma cacao]	-	-	-	-
Unigene0001179	2.6586	0.5826	0.2642	0.5791	10	2	1	2	BnaC08g13650D, partial [Brassica napus]	-	GO:0005623//cell;GO:0043231//intracellular membrane-bounded organelle;GO:0005622//intracellular;GO:0043227//membrane-bounded organelle;GO:0044424//intracellular part;GO:0044464//cell part;GO:0043229//intracellular organelle;GO:0043226//organelle	GO:0043167//ion binding;GO:0005488//binding;GO:0070011//peptidase activity, acting on L-amino acid peptides;GO:0004175//endopeptidase activity;GO:0043169//cation binding;GO:0043168//anion binding;GO:0016787//hydrolase activity;GO:0046914//transition metal ion binding;GO:0097159//organic cyclic compound binding;GO:0003824//catalytic activity;GO:0008233//peptidase activity;GO:0046872//metal ion bin…	GO:0044260//cellular macromolecule metabolic process;GO:1901360//organic cyclic compound metabolic process;GO:0009987//cellular process;GO:0006082//organic acid metabolic process;GO:0044281//small molecule metabolic process;GO:0090304//nucleic acid metabolic process;GO:0019752//carboxylic acid metabolic process;GO:0046483//heterocycle metabolic process;GO:0043170//macromolecule metabolic process;…
Unigene0001180	0	0	0	0	0	0	0	0	--	-	-	-	-
Unigene0001181	0	0	0	0	0	0	0	0	--	-	-	-	-
Unigene0001182	1.4594	0.2665	0.7251	0.2649	6	1	3	1	--	-	-	-	-
Unigene0001183	1.6026	1.4632	0.2654	0	6	5	1	0	--	-	-	-	-
Unigene0001184	0.5659	1.8602	1.6871	0.9246	4	12	12	6	--	-	-	-	-
Unigene0001185	0	1.5706	0.8903	0.1952	0	8	5	1	--	-	-	-	-
Unigene0001186	1.6541	2.1144	1.0958	1.0009	18	21	12	10	--	-	-	-	-
Unigene0001187	2.437	0.2427	0	0	11	1	0	0	--	-	-	-	-
Unigene0001188	99.8422	102.993	102.054	97.9838	1607	1513	1653	1448	PREDICTED: signal peptidase complex catalytic subunit SEC11A [Cucumis sativus]	ko03060//Protein export//Folding, sorting and degradation//Genetic Information Processing	GO:0031224//intrinsic component of membrane;GO:0016020//membrane;GO:0044425//membrane part	GO:0003824//catalytic activity;GO:0016787//hydrolase activity	GO:0019538//protein metabolic process;GO:0008152//metabolic process;GO:0071704//organic substance metabolic process;GO:0043170//macromolecule metabolic process;GO:0044238//primary metabolic process;GO:0010467//gene expression;GO:0051604//protein maturation;GO:0016485//protein processing;GO:0006508//proteolysis
Unigene0001189	0.1638	0.8972	1.302	0	1	5	8	0	--	-	-	-	-
Unigene0001190	0.2844	0.9347	1.1303	0	1	3	4	0	chloroplast envelope membrane protein, partial (chloroplast) [Lagenaria siceraria]	-	GO:0009528//plastid inner membrane;GO:0031975//envelope;GO:0044464//cell part;GO:0043231//intracellular membrane-bounded organelle;GO:0031967//organelle envelope;GO:0044423//virion part;GO:0009526//plastid envelope;GO:0042170//plastid membrane;GO:0005623//cell;GO:0019866//organelle inner membrane;GO:0044425//membrane part;GO:0044422//organelle part;GO:0044424//intracellular part;GO:0031224//intri…	GO:0022891//substrate-specific transmembrane transporter activity;GO:0008324//cation transmembrane transporter activity;GO:0022890//inorganic cation transmembrane transporter activity;GO:0022857//transmembrane transporter activity;GO:0015077//monovalent inorganic cation transmembrane transporter activity;GO:0022892//substrate-specific transporter activity;GO:0015075//ion transmembrane transporter…	GO:0051179//localization;GO:0006812//cation transport;GO:0015672//monovalent inorganic cation transport;GO:0051234//establishment of localization;GO:0044699//single-organism process;GO:1902578//single-organism localization;GO:0006810//transport;GO:0044765//single-organism transport;GO:0015992//proton transport;GO:0006811//ion transport;GO:0006818//hydrogen transport
Unigene0001191	0	0	0	0	0	0	0	0	PREDICTED: surfeit locus protein 1 [Cucumis sativus]	-	-	-	-
Unigene0001192	0	0	0	0	0	0	0	0	PREDICTED: surfeit locus protein 1 [Cucumis sativus]	-	-	-	-
Unigene0001193	0.3798	0.8322	1.5096	1.4478	2	4	8	7	PREDICTED: probable L-type lectin-domain containing receptor kinase S.5 [Cucumis melo]	-	-	GO:0097367//carbohydrate derivative binding;GO:0004713//protein tyrosine kinase activity;GO:0001882//nucleoside binding;GO:0036094//small molecule binding;GO:0001883//purine nucleoside binding;GO:0016773//phosphotransferase activity, alcohol group as acceptor;GO:0016772//transferase activity, transferring phosphorus-containing groups;GO:0005488//binding;GO:0004672//protein kinase activity;GO:0097…	GO:0019538//protein metabolic process;GO:0044237//cellular metabolic process;GO:0006468//protein phosphorylation;GO:0044238//primary metabolic process;GO:0006793//phosphorus metabolic process;GO:0009987//cellular process;GO:0036211//protein modification process;GO:0008152//metabolic process;GO:0044260//cellular macromolecule metabolic process;GO:0016310//phosphorylation;GO:0006796//phosphate-cont…
Unigene0001194	3.5214	1.3979	2.1807	1.7231	69	25	43	31	Gag protease polyprotein [Theobroma cacao]	-	-	-	-
Unigene0001195	23.4547	21.651	26.6104	27.2554	254	214	290	271	F-box/WD repeat-containing protein 4 [Theobroma cacao]	-	-	GO:0046872//metal ion binding;GO:0003676//nucleic acid binding;GO:0046914//transition metal ion binding;GO:0043169//cation binding;GO:0005488//binding;GO:0043167//ion binding;GO:0097159//organic cyclic compound binding;GO:1901363//heterocyclic compound binding	GO:0044238//primary metabolic process;GO:0045017//glycerolipid biosynthetic process;GO:0006796//phosphate-containing compound metabolic process;GO:0044763//single-organism cellular process;GO:0019637//organophosphate metabolic process;GO:0046474//glycerophospholipid biosynthetic process;GO:0006629//lipid metabolic process;GO:0008610//lipid biosynthetic process;GO:0044255//cellular lipid metabolic…
Unigene0001196	0.1127	0	0	0	2	0	0	0	gag-protease polyprotein [Cucumis melo subsp. melo]	-	-	-	-
Unigene0001197	0.2246	0.2461	0.4464	0.4892	4	4	8	8	gag-protease polyprotein [Cucumis melo subsp. melo]	-	-	-	-
Unigene0001198	0	0	0	0	0	0	0	0	--	-	-	-	-
Unigene0001199	0.8108	0	0	0	4	0	0	0	--	-	-	-	-
Unigene0001200	0.6033	4.131	0	1.1498	4	25	0	7	--	-	-	-	-
Unigene0001201	0	0.5263	1.4319	0	0	2	6	0	--	-	-	-	-
Unigene0001202	1.1846	0.9735	2.2072	0.4838	8	6	15	3	--	-	-	-	-
Unigene0001203	2.1554	0.6997	2.0626	1.2173	27	8	26	14	--	-	-	-	-
Unigene0001204	2.9496	4.5048	2.6202	0.5841	66	92	59	12	PREDICTED: plant intracellular Ras-group-related LRR protein 6-like [Cucumis sativus]	-	-	GO:0003824//catalytic activity;GO:0016787//hydrolase activity;GO:0016788//hydrolase activity, acting on ester bonds;GO:0042578//phosphoric ester hydrolase activity;GO:0016791//phosphatase activity	GO:0044237//cellular metabolic process;GO:0009987//cellular process;GO:0006793//phosphorus metabolic process;GO:0006796//phosphate-containing compound metabolic process;GO:0008152//metabolic process
Unigene0001205	0.188	1.8541	1.121	0.4096	1	9	6	2	ChaC-like family protein isoform 2 [Theobroma cacao]	-	-	-	-
Unigene0001206	1.441	0.2631	0.4773	1.0463	6	1	2	4	--	-	-	-	-
Unigene0001207	13.4036	15.1104	16.1262	18.4593	242	249	293	306	BnaA06g23310D [Brassica napus]	-	-	-	-
Unigene0001208	12.5489	9.2191	18.5968	15.6427	173	116	258	198	PREDICTED: acetyltransferase At1g77540 isoform X2 [Cucumis sativus]	-	-	GO:0003824//catalytic activity;GO:0016740//transferase activity	-
Unigene0001209	0	0.1723	1.2501	0	0	2	16	0	PREDICTED: desumoylating isopeptidase 1 [Cucumis sativus]	-	GO:0005623//cell;GO:0044464//cell part;GO:0044424//intracellular part;GO:0005622//intracellular	GO:0016787//hydrolase activity;GO:0003824//catalytic activity	-
Unigene0001210	22.6585	47.8635	55.8266	46.2088	486	937	1205	910	PREDICTED: desumoylating isopeptidase 1 [Cucumis sativus]	-	GO:0043231//intracellular membrane-bounded organelle;GO:0044424//intracellular part;GO:0044464//cell part;GO:0005622//intracellular;GO:0043227//membrane-bounded organelle;GO:0043226//organelle;GO:0005623//cell;GO:0043229//intracellular organelle	GO:0003824//catalytic activity;GO:0016798//hydrolase activity, acting on glycosyl bonds;GO:0016787//hydrolase activity;GO:0004553//hydrolase activity, hydrolyzing O-glycosyl compounds	-
Unigene0001211	0.7655	0.5592	1.5214	2.5013	6	4	12	18	--	-	-	-	-
Unigene0001212	0.937	0.4107	1.6761	0	5	2	9	0	--	-	-	-	-
Unigene0001213	2.1092	1.1555	2.5151	0	10	5	12	0	--	-	-	-	-
Unigene0001214	1.3545	0.2968	0.2692	0.295	5	1	1	1	--	-	-	-	-
Unigene0001215	28.2946	21.9013	34.5895	30.4623	695	491	855	687	PREDICTED: protein phosphatase 1 regulatory subunit pprA [Cucumis melo]	-	-	GO:0003824//catalytic activity;GO:0009975//cyclase activity	GO:0006807//nitrogen compound metabolic process;GO:0034641//cellular nitrogen compound metabolic process;GO:0044237//cellular metabolic process;GO:0006796//phosphate-containing compound metabolic process;GO:0046483//heterocycle metabolic process;GO:1901360//organic cyclic compound metabolic process;GO:0044238//primary metabolic process;GO:0071704//organic substance metabolic process;GO:0044281//s…
Unigene0001216	76.7417	145.191	77.2961	62.5762	3382	5840	3428	2532	PREDICTED: plastidic ATP/ADP-transporter-like [Cucumis melo]	-	GO:0044435//plastid part;GO:0044444//cytoplasmic part;GO:0009536//plastid;GO:0031090//organelle membrane;GO:0043227//membrane-bounded organelle;GO:0043229//intracellular organelle;GO:0044464//cell part;GO:0042170//plastid membrane;GO:0031975//envelope;GO:0031967//organelle envelope;GO:0044446//intracellular organelle part;GO:0043231//intracellular membrane-bounded organelle;GO:0009526//plastid en…	GO:0005215//transporter activity;GO:0015932//nucleobase-containing compound transmembrane transporter activity;GO:0015215//nucleotide transmembrane transporter activity;GO:0015211//purine nucleoside transmembrane transporter activity;GO:0022892//substrate-specific transporter activity;GO:0005337//nucleoside transmembrane transporter activity;GO:0022857//transmembrane transporter activity;GO:00360…	GO:1902578//single-organism localization;GO:0015711//organic anion transport;GO:0044765//single-organism transport;GO:0071702//organic substance transport;GO:0044699//single-organism process;GO:0006820//anion transport;GO:0006810//transport;GO:0051179//localization;GO:0006811//ion transport;GO:0051234//establishment of localization
Unigene0001217	0	0	0	0	0	0	0	0	PREDICTED: plastidic ATP/ADP-transporter-like [Cucumis melo]	-	GO:0005623//cell;GO:0005622//intracellular;GO:0043226//organelle;GO:0044424//intracellular part;GO:0031975//envelope;GO:0031224//intrinsic component of membrane;GO:0043231//intracellular membrane-bounded organelle;GO:0009536//plastid;GO:0042170//plastid membrane;GO:0044464//cell part;GO:0044422//organelle part;GO:0016020//membrane;GO:0044425//membrane part;GO:0043227//membrane-bounded organelle;G…	GO:0008514//organic anion transmembrane transporter activity;GO:0036094//small molecule binding;GO:0015075//ion transmembrane transporter activity;GO:0016491//oxidoreductase activity;GO:0008509//anion transmembrane transporter activity;GO:0000295//adenine nucleotide transmembrane transporter activity;GO:1901677//phosphate transmembrane transporter activity;GO:0003824//catalytic activity;GO:000534…	GO:0006820//anion transport;GO:0008152//metabolic process;GO:0015711//organic anion transport;GO:0051234//establishment of localization;GO:0006811//ion transport;GO:0044699//single-organism process;GO:0051179//localization;GO:0071702//organic substance transport;GO:1902578//single-organism localization;GO:0044765//single-organism transport;GO:0044710//single-organism metabolic process;GO:0006810/…
Unigene0001218	3.7359	0.5458	0	0	30	4	0	0	--	-	-	-	-
Unigene0001219	0.66	1.4463	1.0494	0.2876	5	10	8	2	--	-	-	-	-
Unigene0001220	0.2735	2.0975	0.2718	0.2979	1	7	1	1	PREDICTED: probable L-type lectin-domain containing receptor kinase VI.1 [Cucumis sativus]	-	-	GO:0016740//transferase activity;GO:0097159//organic cyclic compound binding;GO:0016772//transferase activity, transferring phosphorus-containing groups;GO:0001883//purine nucleoside binding;GO:0004672//protein kinase activity;GO:0004674//protein serine/threonine kinase activity;GO:0097367//carbohydrate derivative binding;GO:0005488//binding;GO:1901363//heterocyclic compound binding;GO:0032549//r…	GO:0007049//cell cycle;GO:0044260//cellular macromolecule metabolic process;GO:0009987//cellular process;GO:0044699//single-organism process;GO:0044763//single-organism cellular process;GO:0043170//macromolecule metabolic process;GO:0019538//protein metabolic process;GO:0006796//phosphate-containing compound metabolic process;GO:0006464//cellular protein modification process;GO:0008152//metabolic…
Unigene0001221	2.4391	3.079	10.5379	22.6959	46	53	200	393	PREDICTED: GDSL esterase/lipase At1g09390 [Cucumis melo]	-	GO:0044422//organelle part;GO:0009536//plastid;GO:0044435//plastid part;GO:0044444//cytoplasmic part;GO:0005737//cytoplasm;GO:0043226//organelle;GO:0044424//intracellular part;GO:0005623//cell;GO:0043229//intracellular organelle;GO:0044446//intracellular organelle part;GO:0043231//intracellular membrane-bounded organelle;GO:0043227//membrane-bounded organelle;GO:0044464//cell part;GO:0009532//pla…	GO:0016788//hydrolase activity, acting on ester bonds;GO:0016787//hydrolase activity;GO:0003824//catalytic activity	GO:0044238//primary metabolic process;GO:0006629//lipid metabolic process;GO:0071704//organic substance metabolic process;GO:0044699//single-organism process;GO:0044710//single-organism metabolic process;GO:0008152//metabolic process
Unigene0001222	0.7057	0	2.3374	0	3	0	10	0	--	-	-	-	-
Unigene0001223	1.1099	1.216	1.6544	0	4	4	6	0	VPS13-like protein [Arabidopsis thaliana]	-	-	-	-
Unigene0001224	1.0552	0.9635	0.6991	0	6	5	4	0	BnaA06g27210D [Brassica napus]	-	-	-	-
Unigene0001225	2.2069	0.2418	0.6579	0	10	1	3	0	--	-	-	-	-
Unigene0001226	0.4466	1.4678	0.8875	2.4318	2	6	4	10	--	-	-	-	-
Unigene0001227	0.8332	0.7303	1.3248	0.726	5	4	8	4	PREDICTED: SNF2 domain-containing protein CLASSY 4-like [Cucumis melo]	ko03440//Homologous recombination//Replication and repair//Genetic Information Processing	-	GO:0097159//organic cyclic compound binding;GO:0003676//nucleic acid binding;GO:0005488//binding;GO:0036094//small molecule binding;GO:0097367//carbohydrate derivative binding;GO:0032550//purine ribonucleoside binding;GO:0001882//nucleoside binding;GO:0032549//ribonucleoside binding;GO:0001883//purine nucleoside binding;GO:1901363//heterocyclic compound binding	-
Unigene0001228	0.6942	3.5497	0	0	3	14	0	0	--	-	-	-	-
Unigene0001229	0.1541	1.3504	0.3062	0.1678	1	8	2	1	vicilin-like antimicrobial peptides 2-2 precursor [Sesamum indicum]	-	-	-	GO:0050896//response to stimulus;GO:0051707//response to other organism;GO:0051704//multi-organism process;GO:0009605//response to external stimulus;GO:0043207//response to external biotic stimulus;GO:0009607//response to biotic stimulus;GO:0009620//response to fungus
Unigene0001230	0	3.4316	0.389	1.4924	0	16	2	7	60S ribosomal protein L9e [Galdieria sulphuraria]	ko03010//Ribosome//Translation//Genetic Information Processing	GO:0032991//macromolecular complex;GO:0016020//membrane;GO:0044424//intracellular part;GO:0005623//cell;GO:0030529//ribonucleoprotein complex;GO:0044464//cell part;GO:0005622//intracellular	GO:0003676//nucleic acid binding;GO:0003723//RNA binding;GO:0005198//structural molecule activity;GO:0097159//organic cyclic compound binding;GO:0005488//binding;GO:1901363//heterocyclic compound binding	GO:0071704//organic substance metabolic process;GO:0008152//metabolic process;GO:0010467//gene expression;GO:0009987//cellular process;GO:0043170//macromolecule metabolic process
Unigene0001231	3.0958	1.1582	0.7503	0.329	41	14	10	4	--	-	-	-	-
Unigene0001232	2.6793	0.6524	1.9229	0	18	4	13	0	--	-	-	-	-
Unigene0001233	1.0932	1.0267	0.6208	0.3402	7	6	4	2	--	-	-	-	-
Unigene0001234	0	2.64	0.7981	1.0206	0	18	6	7	PreproMP73 [Cucumis sativus]	-	-	-	-
Unigene0001235	0	1.4179	1.286	0.4698	0	6	6	2	--	-	-	-	-
Unigene0001236	0.7501	1.4794	0.7454	0.6536	5	9	5	4	PREDICTED: pentatricopeptide repeat-containing protein At4g02750-like [Cucumis sativus]	-	-	-	-
Unigene0001237	1.5086	0.3673	1.4991	0	9	2	9	0	--	-	-	-	-
Unigene0001238	0.3969	0.2175	3.1555	0	2	1	16	0	--	-	-	-	-
Unigene0001239	2.613	2.3261	1.6228	0.7115	16	13	10	4	--	-	-	-	-
Unigene0001240	1.0299	0.2821	1.0234	0.2804	4	1	4	1	--	-	-	-	-
Unigene0001241	0.1262	0.2074	0.9404	0.1374	2	3	15	2	PREDICTED: condensin complex subunit 1 [Cucumis sativus]	-	GO:0043227//membrane-bounded organelle;GO:0044424//intracellular part;GO:0005623//cell;GO:0043231//intracellular membrane-bounded organelle;GO:0044464//cell part;GO:0043229//intracellular organelle;GO:0005622//intracellular;GO:0043226//organelle	-	GO:0022402//cell cycle process;GO:0051276//chromosome organization;GO:0007049//cell cycle;GO:0016043//cellular component organization;GO:0044763//single-organism cellular process;GO:0044699//single-organism process;GO:0000280//nuclear division;GO:0006996//organelle organization;GO:0048285//organelle fission;GO:0071840//cellular component organization or biogenesis;GO:0009987//cellular process
Unigene0001242	0.0752	0	0	0	1	0	0	0	PREDICTED: condensin complex subunit 1 [Cucumis sativus]	-	GO:0043227//membrane-bounded organelle;GO:0044424//intracellular part;GO:0043229//intracellular organelle;GO:0005623//cell;GO:0043231//intracellular membrane-bounded organelle;GO:0005622//intracellular;GO:0043226//organelle;GO:0044464//cell part	-	GO:0000280//nuclear division;GO:0016043//cellular component organization;GO:0044699//single-organism process;GO:0044763//single-organism cellular process;GO:0048285//organelle fission;GO:0007049//cell cycle;GO:0071840//cellular component organization or biogenesis;GO:0009987//cellular process;GO:0022402//cell cycle process;GO:0006996//organelle organization;GO:0051276//chromosome organization
Unigene0001243	0.654	1.0032	1.8197	0.4274	5	7	14	3	PREDICTED: condensin complex subunit 1 [Cucumis melo]	-	GO:0005622//intracellular;GO:0005623//cell;GO:0044464//cell part;GO:0043226//organelle;GO:0043229//intracellular organelle;GO:0043227//membrane-bounded organelle;GO:0044424//intracellular part;GO:0043231//intracellular membrane-bounded organelle	GO:0043169//cation binding;GO:0016772//transferase activity, transferring phosphorus-containing groups;GO:0016740//transferase activity;GO:0046872//metal ion binding;GO:0003824//catalytic activity;GO:0043167//ion binding;GO:0005488//binding;GO:0016301//kinase activity;GO:0031420//alkali metal ion binding	GO:0044710//single-organism metabolic process;GO:0044699//single-organism process;GO:0000280//nuclear division;GO:0043436//oxoacid metabolic process;GO:0006793//phosphorus metabolic process;GO:0048285//organelle fission;GO:0007049//cell cycle;GO:0006996//organelle organization;GO:0071704//organic substance metabolic process;GO:0006090//pyruvate metabolic process;GO:0044281//small molecule metabol…
Unigene0001244	3.291	0.5693	2.0654	1.7922	38	6	24	19	PREDICTED: chromo domain-containing protein cec-1 [Fragaria vesca subsp. vesca]	-	-	-	-
Unigene0001245	3.8946	1.255	1.3659	3.8675	34	10	12	31	PREDICTED: chromo domain-containing protein cec-1 [Fragaria vesca subsp. vesca]	-	-	-	-
Unigene0001246	0	0	0	0	0	0	0	0	gag/pol [Oryza sativa Japonica Group]	-	-	GO:1901363//heterocyclic compound binding;GO:0097159//organic cyclic compound binding;GO:0003676//nucleic acid binding;GO:0005488//binding	GO:0071704//organic substance metabolic process;GO:0009987//cellular process;GO:0006139//nucleobase-containing compound metabolic process;GO:0006259//DNA metabolic process;GO:0043170//macromolecule metabolic process;GO:0006807//nitrogen compound metabolic process;GO:0008152//metabolic process;GO:0034641//cellular nitrogen compound metabolic process;GO:0044260//cellular macromolecule metabolic pro…
Unigene0001247	0	0	0	0	0	0	0	0	Retrovirus-related Pol polyprotein from transposon TNT 1-94, partial [Glycine soja]	-	GO:0044464//cell part;GO:0043227//membrane-bounded organelle;GO:0005623//cell;GO:0044424//intracellular part;GO:0043226//organelle;GO:0043229//intracellular organelle;GO:0005622//intracellular;GO:0043231//intracellular membrane-bounded organelle	GO:0005488//binding;GO:0003824//catalytic activity;GO:1901363//heterocyclic compound binding;GO:0043167//ion binding;GO:0043169//cation binding;GO:0003676//nucleic acid binding;GO:0097159//organic cyclic compound binding;GO:0046872//metal ion binding	GO:0044260//cellular macromolecule metabolic process;GO:0006725//cellular aromatic compound metabolic process;GO:0006139//nucleobase-containing compound metabolic process;GO:0034641//cellular nitrogen compound metabolic process;GO:0043170//macromolecule metabolic process;GO:0009987//cellular process;GO:0006259//DNA metabolic process;GO:0046483//heterocycle metabolic process;GO:0006807//nitrogen c…
Unigene0001248	2.7577	1.3734	0	0	11	5	0	0	--	-	-	-	-
Unigene0001249	0	0	0	0.273	0	0	0	2	PREDICTED: E3 ubiquitin-protein ligase PUB23-like [Cucumis sativus]	-	-	GO:0003824//catalytic activity	-
Unigene0001250	0.4824	2.114	1.438	0.5254	2	8	6	2	--	-	-	-	-
Unigene0001251	0	0.5506	0	0	0	4	0	0	PREDICTED: E3 ubiquitin-protein ligase PUB23-like [Cucumis sativus]	-	-	GO:0003824//catalytic activity	-
Unigene0001252	3.3256	0.4555	0	0	16	2	0	0	--	-	-	-	-
Unigene0001253	0	0	0	0	0	0	0	0	--	-	-	-	-
Unigene0001254	0	0	0	0	0	0	0	0	--	-	-	-	-
Unigene0001255	1.5951	0.8739	1.0567	0	6	3	4	0	gag protease polyprotein [Cucumis melo subsp. melo]	-	-	-	-
Unigene0001256	1.5105	1.3065	1.9749	0.6061	19	15	25	7	MuDRA-like transposase [Cucumis melo]	-	-	-	-
Unigene0001257	0	0	0	0	0	0	0	0	DUF679 domain membrane protein 2 [Theobroma cacao]	-	GO:0044437//vacuolar part;GO:0044444//cytoplasmic part;GO:0098588//bounding membrane of organelle;GO:0005622//intracellular;GO:0005774//vacuolar membrane;GO:0043226//organelle;GO:0043229//intracellular organelle;GO:0043227//membrane-bounded organelle;GO:0044422//organelle part;GO:0043231//intracellular membrane-bounded organelle;GO:0005623//cell;GO:0044464//cell part;GO:0044424//intracellular par…	-	-
Unigene0001258	0.4976	0	0.1236	0.5419	8	0	2	8	DUF679 domain membrane protein 2 [Theobroma cacao]	-	GO:0098588//bounding membrane of organelle;GO:0044424//intracellular part;GO:0044464//cell part;GO:0043231//intracellular membrane-bounded organelle;GO:0043226//organelle;GO:0005622//intracellular;GO:0005774//vacuolar membrane;GO:0016020//membrane;GO:0005623//cell;GO:0044444//cytoplasmic part;GO:0031090//organelle membrane;GO:0044422//organelle part;GO:0044437//vacuolar part;GO:0043229//intracell…	-	-
Unigene0001259	4.4565	2.5475	3.0807	1.6883	23	12	16	8	--	-	-	-	-
Unigene0001260	1.8513	1.141	1.9546	0.5041	16	9	17	4	Zinc finger, CCHC-type-like protein [Theobroma cacao]	-	-	GO:0005488//binding	-
Unigene0001261	1.6602	0	0	0.2583	7	0	0	1	--	-	-	-	-
Unigene0001262	0.7655	2.5162	0.2536	0	3	9	1	0	--	-	-	-	-
Unigene0001263	2.1419	9.119	0.7298	1.8663	35	136	12	28	PREDICTED: probable WRKY transcription factor 40 [Cucumis melo]	-	-	GO:0003677//DNA binding;GO:1901363//heterocyclic compound binding;GO:0001071//nucleic acid binding transcription factor activity;GO:0097159//organic cyclic compound binding;GO:0003676//nucleic acid binding;GO:0005488//binding	GO:0031347//regulation of defense response;GO:0044699//single-organism process;GO:0051716//cellular response to stimulus;GO:0044700//single organism signaling;GO:0070887//cellular response to chemical stimulus;GO:0050794//regulation of cellular process;GO:0044710//single-organism metabolic process;GO:0044763//single-organism cellular process;GO:0008152//metabolic process;GO:0007165//signal transd…
Unigene0001264	1.0057	1.2856	4.997	1.4605	6	7	30	8	--	-	-	-	-
Unigene0001265	1.2562	0.2294	2.4967	0	6	1	12	0	--	-	-	-	-
Unigene0001266	0	0	0	0	0	0	0	0	--	-	-	-	-
Unigene0001267	0.5745	1.4162	0.5708	0.4693	4	9	4	3	--	-	-	-	-
Unigene0001268	1.2251	7.6762	0.2283	0.1668	32	183	6	4	Os07g0501200 [Oryza sativa Japonica Group]	-	-	-	-
Unigene0001269	0.8563	4.6911	0	0	4	20	0	0	BnaC06g05480D [Brassica napus]	-	-	-	-
Unigene0001270	1.7126	0.4691	0.4255	0	8	2	2	0	hypothetical protein Csa_7G004025 [Cucumis sativus]	-	-	-	-
Unigene0001271	0	0	0.1996	0	0	0	2	0	PREDICTED: cytochrome P450 705A5-like [Cucumis melo]	-	-	GO:1901363//heterocyclic compound binding;GO:0097159//organic cyclic compound binding;GO:0016491//oxidoreductase activity;GO:0046906//tetrapyrrole binding;GO:0043169//cation binding;GO:0046872//metal ion binding;GO:0046914//transition metal ion binding;GO:0043167//ion binding;GO:0003824//catalytic activity;GO:0005488//binding	GO:0008152//metabolic process;GO:0044710//single-organism metabolic process;GO:0044699//single-organism process
Unigene0001272	0.0772	0.0846	3.1832	3.489	2	2	83	83	PREDICTED: cytochrome P450 705A5-like [Cucumis melo]	-	-	GO:0043167//ion binding;GO:0046914//transition metal ion binding;GO:0046872//metal ion binding;GO:0097159//organic cyclic compound binding;GO:0043169//cation binding;GO:0003824//catalytic activity;GO:1901363//heterocyclic compound binding;GO:0046906//tetrapyrrole binding;GO:0016491//oxidoreductase activity;GO:0005488//binding	GO:0044699//single-organism process;GO:0044710//single-organism metabolic process;GO:0008152//metabolic process
Unigene0001273	0.3193	1.9243	1.2693	0	2	11	8	0	--	-	-	-	-
Unigene0001274	1.4986	1.1728	0.8509	0	7	5	4	0	--	-	-	-	-
Unigene0001275	1.8478	1.8896	3.0603	0.9392	15	14	25	7	--	-	-	-	-
Unigene0001276	28.1563	17.8269	13.426	17.5184	1663	961	798	950	PREDICTED: extended synaptotagmin-1 [Cucumis melo]	-	GO:0071944//cell periphery;GO:0016020//membrane;GO:0005911//cell-cell junction;GO:0043231//intracellular membrane-bounded organelle;GO:0043229//intracellular organelle;GO:0030312//external encapsulating structure;GO:0043227//membrane-bounded organelle;GO:0044425//membrane part;GO:0005623//cell;GO:0005622//intracellular;GO:0031224//intrinsic component of membrane;GO:0044464//cell part;GO:0044424//…	GO:0016829//lyase activity;GO:0016831//carboxy-lyase activity;GO:0016830//carbon-carbon lyase activity;GO:0003824//catalytic activity	-
Unigene0001277	0.8674	0.1901	0.1724	0.5668	10	2	2	6	--	-	-	-	-
Unigene0001278	3.9258	1.0323	0	0	50	12	0	0	--	-	-	-	-
Unigene0001279	1.067	1.503	1.0603	0.6641	7	9	7	4	--	-	-	-	-
Unigene0001280	34.6419	35.8202	47.4405	48.5777	320	302	441	412	PREDICTED: signal recognition particle 9 kDa protein [Cucumis sativus]	ko03060//Protein export//Folding, sorting and degradation//Genetic Information Processing	GO:0044424//intracellular part;GO:0005622//intracellular;GO:0044444//cytoplasmic part;GO:0030529//ribonucleoprotein complex;GO:0005623//cell;GO:0048500//signal recognition particle;GO:0044464//cell part;GO:0032991//macromolecular complex;GO:0005737//cytoplasm	GO:0003676//nucleic acid binding;GO:0005488//binding;GO:0097159//organic cyclic compound binding;GO:1901363//heterocyclic compound binding;GO:0003723//RNA binding	GO:0006605//protein targeting;GO:0009889//regulation of biosynthetic process;GO:0044699//single-organism process;GO:0051179//localization;GO:2000112//regulation of cellular macromolecule biosynthetic process;GO:0046907//intracellular transport;GO:0010608//posttranscriptional regulation of gene expression;GO:0006886//intracellular protein transport;GO:0034613//cellular protein localization;GO:0019…
Unigene0001281	1.1281	0.412	0.5605	0	6	2	3	0	--	-	-	-	-
Unigene0001282	0	0	0	0	0	0	0	0	--	-	-	-	-
Unigene0001283	1.0585	6.2204	0	0.2096	11	59	0	2	--	-	-	-	-
Unigene0001284	0.9754	1.7099	0.3877	0	5	8	2	0	PREDICTED: disease resistance protein RGA2-like [Elaeis guineensis]	-	GO:0043227//membrane-bounded organelle;GO:0043229//intracellular organelle;GO:0044464//cell part;GO:0005623//cell;GO:0005622//intracellular;GO:0044424//intracellular part;GO:0043226//organelle;GO:0043231//intracellular membrane-bounded organelle	GO:0001882//nucleoside binding;GO:0032549//ribonucleoside binding;GO:0036094//small molecule binding;GO:1901363//heterocyclic compound binding;GO:0032550//purine ribonucleoside binding;GO:0005488//binding;GO:0097159//organic cyclic compound binding;GO:0097367//carbohydrate derivative binding;GO:0001883//purine nucleoside binding	-
Unigene0001285	0	0.6978	0	0	0	4	0	0	hypothetical protein glysoja_013944 [Glycine soja]	-	-	-	-
Unigene0001286	1.1606	4.1327	0.2883	0	8	26	2	0	PREDICTED: mitotic apparatus protein p62-like [Glycine max]	-	-	-	-
Unigene0001287	0.1633	0.7157	5.7611	0	2	8	71	0	protein SELF-PRUNING-like [Cucumis sativus]	-	-	-	-
Unigene0001288	0.1095	0.5999	2.2306	1.0734	2	10	41	18	glutamine amidotransferase [Gossypium arboreum]	-	-	GO:0003824//catalytic activity	GO:0006082//organic acid metabolic process;GO:0044763//single-organism cellular process;GO:0043436//oxoacid metabolic process;GO:0044699//single-organism process;GO:0044237//cellular metabolic process;GO:0009064//glutamine family amino acid metabolic process;GO:0044281//small molecule metabolic process;GO:0044238//primary metabolic process;GO:0008152//metabolic process;GO:0006807//nitrogen compou…
Unigene0001289	16.6125	12.6735	18.8924	31.496	270	188	309	470	glutamine amidotransferase [Gossypium arboreum]	-	-	GO:0003824//catalytic activity	GO:0044763//single-organism cellular process;GO:0043436//oxoacid metabolic process;GO:0006082//organic acid metabolic process;GO:0044710//single-organism metabolic process;GO:0019752//carboxylic acid metabolic process;GO:0044281//small molecule metabolic process;GO:0044699//single-organism process;GO:0044238//primary metabolic process;GO:0009987//cellular process;GO:1901605//alpha-amino acid meta…
Unigene0001290	1.9335	2.1184	0.9607	0	16	16	8	0	--	-	-	-	-
Unigene0001291	3.0138	2.9605	0.4131	0.2264	29	26	4	2	--	-	-	-	-
Unigene0001292	0.8314	0.4555	1.8589	0.2264	4	2	9	1	Elongation factor 1-alpha [Aegilops tauschii]	-	-	GO:0005488//binding;GO:0097159//organic cyclic compound binding	-
Unigene0001293	2.4183	5.54	1.7477	0.1197	22	46	16	1	hypothetical protein M569_00079, partial [Genlisea aurea]	-	-	-	-
Unigene0001294	1.6602	0	1.6498	0.775	7	0	7	3	--	-	-	-	-
Unigene0001295	1.6101	0.588	0.2667	0	6	2	1	0	--	-	-	-	-
Unigene0001296	0.8563	0.9382	2.3401	0	4	4	11	0	--	-	-	-	-
Unigene0001297	0.9422	0	0.9363	1.0262	6	0	6	6	--	-	-	-	-
Unigene0001298	0	0	0.7122	0	0	0	4	0	--	-	-	-	-
Unigene0001299	0.3997	0	0.993	1.306	2	0	5	6	--	-	-	-	-
Unigene0001300	51.7507	37.7291	43.2666	24.0289	1330	885	1119	567	PREDICTED: LOB domain-containing protein 41 [Cucumis sativus]	-	-	-	-
Unigene0001301	0.4783	1.5722	0	0	2	6	0	0	--	-	-	-	-
Unigene0001302	3.1249	1.9972	2.7171	1.9853	24	14	21	14	--	-	-	-	-
Unigene0001303	2.3816	0.2175	0.9861	0	12	1	5	0	--	-	-	-	-
Unigene0001304	1.0469	0.4588	0.4161	1.3682	5	2	2	6	--	-	-	-	-
Unigene0001305	0.3956	0	2.3585	2.1541	2	0	12	10	--	-	-	-	-
Unigene0001306	1.8438	0	0.2617	1.1476	7	0	1	4	--	-	-	-	-
Unigene0001307	0.8195	0.2245	0.8143	0	4	1	4	0	--	-	-	-	-
Unigene0001308	0	0.9862	0	0	0	4	0	0	--	-	-	-	-
Unigene0001309	2.3816	0	0	0.2882	9	0	0	1	--	-	-	-	-
Unigene0001310	3.0833	0	0.2357	0	13	0	1	0	--	-	-	-	-
Unigene0001311	0.7521	0.824	4.2973	0	4	4	23	0	--	-	-	-	-
Unigene0001312	1.5732	0	0.2605	0.2856	6	0	1	1	--	-	-	-	-
Unigene0001313	0.6017	2.6369	0.1993	0.4369	3	12	1	2	--	-	-	-	-
Unigene0001314	1.3449	0.1842	0.6682	1.0986	8	1	4	6	--	-	-	-	-
Unigene0001315	1.6599	1.8847	0.6598	0	55	57	22	0	PREDICTED: superkiller viralicidic activity 2-like 2 [Nicotiana tomentosiformis]	-	-	-	-
Unigene0001316	0.1865	0	0	0	4	0	0	0	DUF4283 domain protein [Medicago truncatula]	-	-	-	GO:0009987//cellular process
Unigene0001317	0.2646	1.4497	0.7889	0	1	5	3	0	--	-	-	-	-
Unigene0001318	3.1882	1.497	1.0183	0.4961	28	12	9	4	Electron transfer flavoprotein-ubiquinone oxidoreductase [Morus notabilis]	-	-	-	-
Unigene0001319	3.3783	1.9996	1.6206	0.9727	87	47	42	23	--	-	-	-	-
Unigene0001320	3.5725	0.5592	2.3666	0	21	3	14	0	--	-	-	-	-
Unigene0001321	2.4567	3.9478	1.6275	1.9622	15	22	10	11	hypothetical protein M569_12098, partial [Genlisea aurea]	-	-	-	-
Unigene0001322	1.0709	1.98	0.266	0.9477	16	27	4	13	Nitrate reductase 2 [Theobroma cacao]	ko00910//Nitrogen metabolism//Energy metabolism//Metabolism	-	GO:0043167//ion binding;GO:0016491//oxidoreductase activity;GO:0036094//small molecule binding;GO:0000166//nucleotide binding;GO:0043169//cation binding;GO:0050662//coenzyme binding;GO:0046914//transition metal ion binding;GO:0046906//tetrapyrrole binding;GO:0016661//oxidoreductase activity, acting on other nitrogenous compounds as donors;GO:0003824//catalytic activity;GO:0097159//organic cyclic …	GO:0044763//single-organism cellular process;GO:0044710//single-organism metabolic process;GO:0044699//single-organism process;GO:2001057//reactive nitrogen species metabolic process;GO:0006082//organic acid metabolic process;GO:0009987//cellular process;GO:0008152//metabolic process;GO:0071704//organic substance metabolic process;GO:0044281//small molecule metabolic process;GO:0043436//oxoacid m…
Unigene0001323	3.7243	1.0645	0.4827	0	23	6	3	0	--	-	-	-	-
Unigene0001324	0.5014	1.6481	1.7438	0	2	6	7	0	--	-	-	-	-
Unigene0001325	1.6254	2.0776	0.5384	0	6	7	2	0	--	-	-	-	-
Unigene0001326	1.0557	2.3134	0.1499	1.3141	7	14	1	8	PREDICTED: wall-associated receptor kinase 3-like, partial [Cucumis melo]	-	-	GO:0016301//kinase activity;GO:0016772//transferase activity, transferring phosphorus-containing groups;GO:0001882//nucleoside binding;GO:0016740//transferase activity;GO:0036094//small molecule binding;GO:0097159//organic cyclic compound binding;GO:1901363//heterocyclic compound binding;GO:0043167//ion binding;GO:0001883//purine nucleoside binding;GO:0043169//cation binding;GO:0016773//phosphotr…	GO:0006464//cellular protein modification process;GO:0008152//metabolic process;GO:0044238//primary metabolic process;GO:0043170//macromolecule metabolic process;GO:0006796//phosphate-containing compound metabolic process;GO:0044267//cellular protein metabolic process;GO:0009987//cellular process;GO:0044260//cellular macromolecule metabolic process;GO:0019538//protein metabolic process;GO:0044237…
Unigene0001327	0.6545	0.7171	0	0.7128	3	3	0	3	--	-	-	-	-
Unigene0001328	0.7456	0.2723	0.247	0.2707	3	1	1	1	hypothetical protein [Beta vulgaris subsp. vulgaris]	-	-	-	-
Unigene0001329	0	0.8821	1.6	4.0084	0	7	14	32	triacylglycerol lipase 1 [Arachis hypogaea]	-	-	GO:0016787//hydrolase activity;GO:0016788//hydrolase activity, acting on ester bonds;GO:0003824//catalytic activity;GO:0016298//lipase activity	GO:0008152//metabolic process;GO:0044238//primary metabolic process
Unigene0001330	0.3652	0.8003	1.2703	1.5912	2	4	7	8	--	-	-	-	-
Unigene0001331	0.7423	1.0844	0.7377	0	3	4	3	0	--	-	-	-	-
Unigene0001332	0.4928	0.8098	0.9793	0.5367	2	3	4	2	--	-	-	-	-
Unigene0001333	2.0524	2.6984	2.4474	2.6824	20	24	24	24	expressed protein [Oryza sativa Japonica Group]	-	-	GO:0005488//binding;GO:0043169//cation binding;GO:0043167//ion binding;GO:0046914//transition metal ion binding;GO:0046872//metal ion binding	-
Unigene0001334	2.5712	1.228	1.7033	1.6515	39	17	26	23	PREDICTED: protein TORNADO 2-like [Cucumis melo]	-	GO:0030054//cell junction;GO:0016020//membrane;GO:0005911//cell-cell junction;GO:0031224//intrinsic component of membrane;GO:0044425//membrane part	-	GO:0044238//primary metabolic process;GO:0007389//pattern specification process;GO:0065007//biological regulation;GO:0009943//adaxial/abaxial axis specification;GO:2000026//regulation of multicellular organismal development;GO:0044700//single organism signaling;GO:0048513//organ development;GO:0051234//establishment of localization;GO:0009798//axis specification;GO:0010033//response to organic su…
Unigene0001335	0.547	1.1986	0	0.2979	2	4	0	1	--	-	-	-	-
Unigene0001336	1.0162	1.1134	0.5049	0	4	4	2	0	--	-	-	-	-
Unigene0001337	1.5448	0.141	0.1279	1.1217	12	1	1	8	PREDICTED: probable metal-nicotianamine transporter YSL7 [Cucumis sativus]	-	-	-	GO:0044763//single-organism cellular process;GO:0009987//cellular process;GO:0044699//single-organism process
Unigene0001338	2.1775	2.1869	3.0654	6.7196	12	11	17	34	--	-	-	-	-
Unigene0001339	81.0056	65.9352	64.1011	71.436	1797	1335	1431	1455	PREDICTED: neurogenic protein mastermind-like [Cucumis melo]	-	-	GO:0043167//ion binding;GO:0043169//cation binding;GO:0005488//binding	GO:0051179//localization;GO:0006812//cation transport;GO:0006810//transport;GO:0006811//ion transport;GO:0044765//single-organism transport;GO:0051234//establishment of localization;GO:0044699//single-organism process;GO:1902578//single-organism localization
Unigene0001340	0	0	0	0	0	0	0	0	--	-	-	-	-
Unigene0001341	2.7569	0.4027	0.9132	0	15	2	5	0	--	-	-	-	-
Unigene0001342	0.8195	2.0202	0.2036	0.6694	4	9	1	3	--	-	-	-	-
Unigene0001343	2.6642	2.1229	0.9627	0	11	8	4	0	--	-	-	-	-
Unigene0001344	0	0	0	0	0	0	0	0	PREDICTED: protein ELC-like [Cucumis melo]	ko04144//Endocytosis//Transport and catabolism//Cellular Processes	-	-	GO:0019538//protein metabolic process;GO:0043412//macromolecule modification;GO:0051179//localization;GO:0008104//protein localization;GO:0033036//macromolecule localization;GO:0043170//macromolecule metabolic process;GO:0008152//metabolic process;GO:0044238//primary metabolic process;GO:0071704//organic substance metabolic process;GO:0036211//protein modification process
Unigene0001345	10.1653	13.0365	12.8503	9.6922	305	357	388	267	PREDICTED: protein ELC-like [Cucumis melo]	ko04144//Endocytosis//Transport and catabolism//Cellular Processes	-	-	GO:0036211//protein modification process;GO:0043170//macromolecule metabolic process;GO:0008104//protein localization;GO:0019538//protein metabolic process;GO:0008152//metabolic process;GO:0044238//primary metabolic process;GO:0033036//macromolecule localization;GO:0043412//macromolecule modification;GO:0051179//localization;GO:0071704//organic substance metabolic process
Unigene0001346	0.9195	1.5111	0	0.3338	6	9	0	2	PREDICTED: protein TRANSPARENT TESTA 12 [Cucumis sativus]	-	GO:0031224//intrinsic component of membrane;GO:0044425//membrane part;GO:0016020//membrane	GO:0005215//transporter activity;GO:0015291//secondary active transmembrane transporter activity;GO:0022857//transmembrane transporter activity;GO:0022804//active transmembrane transporter activity	GO:0042493//response to drug;GO:0051179//localization;GO:0015893//drug transport;GO:0044763//single-organism cellular process;GO:0051234//establishment of localization;GO:0044765//single-organism transport;GO:1902578//single-organism localization;GO:0042221//response to chemical;GO:0044699//single-organism process;GO:0009987//cellular process;GO:0006810//transport;GO:0050896//response to stimulus
Unigene0001347	0.9551	1.4087	2.5918	2.1205	26	35	71	53	LRR receptor-like serine/threonine-protein kinase FLS2 [Aegilops tauschii]	-	-	-	-
Unigene0001348	7.8241	6.8262	8.4947	11.5199	108	86	118	146	PREDICTED: ethylene-responsive transcription factor ERF118-like [Cucumis sativus]	-	-	GO:0097159//organic cyclic compound binding;GO:0003676//nucleic acid binding;GO:0005488//binding;GO:1901363//heterocyclic compound binding;GO:0001071//nucleic acid binding transcription factor activity	GO:0050789//regulation of biological process;GO:0071704//organic substance metabolic process;GO:0060255//regulation of macromolecule metabolic process;GO:0009059//macromolecule biosynthetic process;GO:0009987//cellular process;GO:0034645//cellular macromolecule biosynthetic process;GO:0044237//cellular metabolic process;GO:1901576//organic substance biosynthetic process;GO:0044249//cellular biosy…
Unigene0001349	6.1763	2.2147	4.7984	4.77	55	18	43	39	Outward-rectifying potassium channel 4 -like protein [Gossypium arboreum]	-	-	-	-
Unigene0001350	0	0.2577	0.4675	1.5372	0	1	2	6	calcium-dependent protein kinase [Oryza sativa Japonica Group]	ko04626//Plant-pathogen interaction//Environmental adaptation//Organismal Systems	-	-	-
Unigene0001351	1.4656	0	1.6991	0.5321	6	0	7	2	--	-	-	-	-
Unigene0001352	3.0897	3.906	1.7713	0.5177	26	30	15	4	--	-	-	-	-
Unigene0001353	0.2909	0.6374	0.1445	2.3761	2	4	1	15	copia-like retrotransposon Hopscotch polyprotein [Zea mays]	-	-	-	-
Unigene0001354	0.5577	0.611	0	0.3037	2	2	0	1	PREDICTED: uncharacterized protein LOC102612045 [Citrus sinensis]	-	-	-	-
Unigene0001355	1.5213	0.7144	0.6479	0	7	3	3	0	--	-	-	-	-
Unigene0001356	1.3427	0.8406	0.953	0.2089	7	4	5	1	--	-	-	-	-
Unigene0001357	2.8003	1.8048	2.619	0.7176	17	10	16	4	--	-	-	-	-
Unigene0001358	3.477	0.9292	1.0113	0.1847	41	10	12	2	--	-	-	-	-
Unigene0001359	0.4266	0.701	0.6358	1.3938	2	3	3	6	--	-	-	-	-
Unigene0001360	8.3451	5.5056	8.0251	4.2024	93	56	90	43	PREDICTED: indole-3-acetic acid-induced protein ARG7-like [Cucumis sativus]	ko04075//Plant hormone signal transduction//Signal transduction//Environmental Information Processing	-	-	-
Unigene0001361	1.033	2.075	2.9084	0.1875	6	11	17	1	--	-	-	-	-
Unigene0001362	1.0785	2.0678	3.0811	0.881	8	14	23	6	--	-	-	-	-
Unigene0001363	6.2067	4.5863	5.5939	3.1442	43	29	39	20	--	-	-	-	-
Unigene0001364	1.7114	2.8126	1.7006	1.6775	10	15	10	9	--	-	-	-	-
Unigene0001365	0	0	0	0	0	0	0	0	--	-	-	-	-
Unigene0001366	2.1533	0.2145	0.389	0	11	1	2	0	--	-	-	-	-
Unigene0001367	0.9688	0.7961	0.722	0.7914	4	3	3	3	PREDICTED: subtilisin-like protease [Malus domestica]	-	-	GO:0004175//endopeptidase activity;GO:0003824//catalytic activity;GO:0016787//hydrolase activity;GO:0070011//peptidase activity, acting on L-amino acid peptides;GO:0008233//peptidase activity	GO:0043170//macromolecule metabolic process;GO:0019538//protein metabolic process;GO:0044238//primary metabolic process;GO:0071704//organic substance metabolic process;GO:0008152//metabolic process
Unigene0001368	0.4865	0.2665	0.4834	1.5895	2	1	2	6	PREDICTED: subtilisin-like protease SBT5.3 [Cucumis sativus]	-	-	GO:0004175//endopeptidase activity;GO:0008233//peptidase activity;GO:0016787//hydrolase activity;GO:0016491//oxidoreductase activity;GO:0016627//oxidoreductase activity, acting on the CH-CH group of donors;GO:0070011//peptidase activity, acting on L-amino acid peptides;GO:0003824//catalytic activity;GO:0016628//oxidoreductase activity, acting on the CH-CH group of donors, NAD or NADP as acceptor	GO:0044710//single-organism metabolic process;GO:0044238//primary metabolic process;GO:0008152//metabolic process;GO:0019538//protein metabolic process;GO:0043170//macromolecule metabolic process;GO:0044699//single-organism process;GO:0071704//organic substance metabolic process
Unigene0001369	2.362	0.8626	1.0953	0	15	5	7	0	--	-	-	-	-
Unigene0001370	4.1884	0.5399	1.2241	0	17	2	5	0	--	-	-	-	-
Unigene0001371	3.4254	7.0165	3.4038	3.3739	115	215	115	104	tRNA-splicing ligase RtcB [Gossypium arboreum]	-	GO:0043227//membrane-bounded organelle;GO:0043231//intracellular membrane-bounded organelle;GO:0031984//organelle subcompartment;GO:0043226//organelle;GO:0044446//intracellular organelle part;GO:0044424//intracellular part;GO:0005622//intracellular;GO:0044464//cell part;GO:0043229//intracellular organelle;GO:0044422//organelle part;GO:0005623//cell	GO:0016740//transferase activity;GO:0003824//catalytic activity	-
Unigene0001372	0	2.7905	0.0487	2.0805	0	52	1	39	Leucine-rich receptor-like protein kinase family protein [Theobroma cacao]	-	GO:0016020//membrane	GO:0016773//phosphotransferase activity, alcohol group as acceptor;GO:0032549//ribonucleoside binding;GO:0036094//small molecule binding;GO:0001883//purine nucleoside binding;GO:0001882//nucleoside binding;GO:1901363//heterocyclic compound binding;GO:0032550//purine ribonucleoside binding;GO:0016740//transferase activity;GO:0005488//binding;GO:0016772//transferase activity, transferring phosphoru…	GO:0006464//cellular protein modification process;GO:0044267//cellular protein metabolic process;GO:0044238//primary metabolic process;GO:0019538//protein metabolic process;GO:0009987//cellular process;GO:0043170//macromolecule metabolic process;GO:0043412//macromolecule modification;GO:0044260//cellular macromolecule metabolic process;GO:0044237//cellular metabolic process;GO:0036211//protein mo…
Unigene0001373	0	0	0	0	0	0	0	0	Leucine-rich receptor-like protein kinase family protein [Theobroma cacao]	-	GO:0016020//membrane	GO:0016772//transferase activity, transferring phosphorus-containing groups;GO:0001883//purine nucleoside binding;GO:0097159//organic cyclic compound binding;GO:1901363//heterocyclic compound binding;GO:0097367//carbohydrate derivative binding;GO:0032549//ribonucleoside binding;GO:0032550//purine ribonucleoside binding;GO:0005488//binding;GO:0003824//catalytic activity;GO:0004672//protein kinase …	GO:0044260//cellular macromolecule metabolic process;GO:0006464//cellular protein modification process;GO:0043412//macromolecule modification;GO:0044237//cellular metabolic process;GO:0019538//protein metabolic process;GO:0044238//primary metabolic process;GO:0009987//cellular process;GO:0071704//organic substance metabolic process;GO:0043170//macromolecule metabolic process;GO:0008152//metabolic…
Unigene0001374	2.7918	6.4397	4.8185	4.9612	38	80	66	62	PREDICTED: calcium-binding allergen Bet v 3 [Cucumis melo]	ko04626//Plant-pathogen interaction//Environmental adaptation//Organismal Systems	-	GO:0005488//binding;GO:0043167//ion binding;GO:0043169//cation binding;GO:0046872//metal ion binding	GO:0016043//cellular component organization;GO:0048856//anatomical structure development;GO:0044763//single-organism cellular process;GO:0032502//developmental process;GO:0009653//anatomical structure morphogenesis;GO:0048869//cellular developmental process;GO:0044699//single-organism process;GO:0030154//cell differentiation;GO:0071840//cellular component organization or biogenesis;GO:0009987//ce…
Unigene0001375	3.9247	0.6615	1.1	0.6576	39	6	11	6	--	-	-	-	-
Unigene0001376	1.1208	0.8186	1.6706	1.2207	6	4	9	6	PREDICTED: probable LRR receptor-like serine/threonine-protein kinase At4g08850 [Phoenix dactylifera]	-	-	-	-
Unigene0001377	1.0858	0.5098	0	0.1689	14	6	0	2	retrotransposon protein, putative, unclassified [Oryza sativa Japonica Group]	-	-	GO:0005488//binding	-
Unigene0001378	1.6011	0.4678	0.7425	0.465	30	8	14	8	OSJNBa0061G20.16 [Oryza sativa Japonica Group]	-	-	GO:0005488//binding	-
Unigene0001379	2.2864	1.9682	0.6491	0	14	11	4	0	OSJNBb0016D16.10 [Oryza sativa Japonica Group]	-	GO:0005622//intracellular;GO:0043227//membrane-bounded organelle;GO:0043229//intracellular organelle;GO:0044424//intracellular part;GO:0043226//organelle;GO:0043231//intracellular membrane-bounded organelle;GO:0005623//cell;GO:0044464//cell part	GO:1901363//heterocyclic compound binding;GO:0003676//nucleic acid binding;GO:0097159//organic cyclic compound binding;GO:0005488//binding	GO:0006807//nitrogen compound metabolic process;GO:0044238//primary metabolic process;GO:0044260//cellular macromolecule metabolic process;GO:0006725//cellular aromatic compound metabolic process;GO:0006139//nucleobase-containing compound metabolic process;GO:0090304//nucleic acid metabolic process;GO:0044237//cellular metabolic process;GO:0043170//macromolecule metabolic process;GO:0071704//orga…
Unigene0001380	2.6764	0.2095	0.3799	0.4164	14	1	2	2	--	-	-	-	-
Unigene0001381	10.7204	13.4542	24.2596	14.0644	220	252	501	265	PREDICTED: abscisic acid receptor PYL4-like [Cucumis melo]	ko04075//Plant hormone signal transduction//Signal transduction//Environmental Information Processing	GO:0005622//intracellular;GO:0043227//membrane-bounded organelle;GO:0043231//intracellular membrane-bounded organelle;GO:0044424//intracellular part;GO:0043226//organelle;GO:0043229//intracellular organelle;GO:0005623//cell;GO:0044464//cell part	GO:0060089//molecular transducer activity;GO:0005515//protein binding;GO:0008289//lipid binding;GO:0019840//isoprenoid binding;GO:0005488//binding;GO:0046983//protein dimerization activity	GO:0044763//single-organism cellular process;GO:0009755//hormone-mediated signaling pathway;GO:0009725//response to hormone;GO:0009987//cellular process;GO:0010033//response to organic substance;GO:0009719//response to endogenous stimulus;GO:0065007//biological regulation;GO:0050794//regulation of cellular process;GO:0051716//cellular response to stimulus;GO:0071495//cellular response to endogeno…
Unigene0001382	1.5878	0.5799	1.0518	0	6	2	4	0	--	-	-	-	-
Unigene0001383	49.6642	19.5758	0.6018	0.5772	1312	472	16	14	PREDICTED: protein WALLS ARE THIN 1 [Cucumis sativus]	-	GO:0005622//intracellular;GO:0044464//cell part;GO:0098588//bounding membrane of organelle;GO:0005773//vacuole;GO:0005737//cytoplasm;GO:0044424//intracellular part;GO:0031224//intrinsic component of membrane;GO:0043227//membrane-bounded organelle;GO:0044444//cytoplasmic part;GO:0044437//vacuolar part;GO:0043231//intracellular membrane-bounded organelle;GO:0043226//organelle;GO:0043229//intracellu…	GO:0005215//transporter activity	GO:0060918//auxin transport;GO:0043436//oxoacid metabolic process;GO:0071310//cellular response to organic substance;GO:0009416//response to light stimulus;GO:0009314//response to radiation;GO:0071495//cellular response to endogenous stimulus;GO:0032501//multicellular organismal process;GO:0016049//cell growth;GO:0009308//amine metabolic process;GO:0051239//regulation of multicellular organismal …
Unigene0001384	4.6279	0.1779	0	0	57	2	0	0	PREDICTED: protein WALLS ARE THIN 1 [Cucumis melo]	-	GO:0043226//organelle;GO:0044437//vacuolar part;GO:0016020//membrane;GO:0044422//organelle part;GO:0044444//cytoplasmic part;GO:0005623//cell;GO:0043229//intracellular organelle;GO:0044446//intracellular organelle part;GO:0044424//intracellular part;GO:0005774//vacuolar membrane;GO:0031224//intrinsic component of membrane;GO:0005737//cytoplasm;GO:0098588//bounding membrane of organelle;GO:0005622…	GO:0005215//transporter activity	GO:0032501//multicellular organismal process;GO:0019752//carboxylic acid metabolic process;GO:0009653//anatomical structure morphogenesis;GO:0065008//regulation of biological quality;GO:0048869//cellular developmental process;GO:1901605//alpha-amino acid metabolic process;GO:0050793//regulation of developmental process;GO:0033238//regulation of cellular amine metabolic process;GO:0009755//hormone…
Unigene0001385	0.4992	0.2735	0	1.6311	2	1	0	6	--	-	-	-	-
Unigene0001386	0	0	0.1025	0	0	0	1	0	PREDICTED: abscisic acid receptor PYL2 isoform X2 [Cucumis melo]	ko04075//Plant hormone signal transduction//Signal transduction//Environmental Information Processing	GO:0043227//membrane-bounded organelle;GO:0005622//intracellular;GO:0043229//intracellular organelle;GO:0044464//cell part;GO:0044424//intracellular part;GO:0043231//intracellular membrane-bounded organelle;GO:0005623//cell;GO:0043226//organelle	GO:0005488//binding;GO:0008289//lipid binding;GO:0060089//molecular transducer activity;GO:0005515//protein binding;GO:0019840//isoprenoid binding;GO:0046983//protein dimerization activity	GO:0071310//cellular response to organic substance;GO:0009987//cellular process;GO:0009719//response to endogenous stimulus;GO:0070887//cellular response to chemical stimulus;GO:0065007//biological regulation;GO:0007165//signal transduction;GO:0007154//cell communication;GO:0032870//cellular response to hormone stimulus;GO:0044700//single organism signaling;GO:0050794//regulation of cellular proc…
Unigene0001387	0	0	0	0	0	0	0	0	PREDICTED: abscisic acid receptor PYL2 isoform X1 [Cucumis melo]	ko04075//Plant hormone signal transduction//Signal transduction//Environmental Information Processing	GO:0043227//membrane-bounded organelle;GO:0005622//intracellular;GO:0005623//cell;GO:0044424//intracellular part;GO:0043229//intracellular organelle;GO:0043226//organelle;GO:0043231//intracellular membrane-bounded organelle;GO:0044464//cell part	GO:0060089//molecular transducer activity;GO:0046983//protein dimerization activity;GO:0005488//binding;GO:0005515//protein binding;GO:0019840//isoprenoid binding;GO:0008289//lipid binding	GO:0023052//signaling;GO:0032870//cellular response to hormone stimulus;GO:0010033//response to organic substance;GO:0009719//response to endogenous stimulus;GO:0009987//cellular process;GO:0044763//single-organism cellular process;GO:0042221//response to chemical;GO:0050896//response to stimulus;GO:0071310//cellular response to organic substance;GO:0070887//cellular response to chemical stimulus…
Unigene0001388	0	0	0	0.5943	0	0	0	4	PREDICTED: abscisic acid receptor PYL2 [Cucumis sativus]	ko04075//Plant hormone signal transduction//Signal transduction//Environmental Information Processing	GO:0043226//organelle;GO:0005623//cell;GO:0043227//membrane-bounded organelle;GO:0044464//cell part;GO:0005622//intracellular;GO:0044424//intracellular part;GO:0043231//intracellular membrane-bounded organelle;GO:0043229//intracellular organelle	GO:0005515//protein binding;GO:0005488//binding;GO:0008289//lipid binding;GO:0046983//protein dimerization activity;GO:0060089//molecular transducer activity;GO:0019840//isoprenoid binding	GO:0009725//response to hormone;GO:0044699//single-organism process;GO:0007165//signal transduction;GO:0044255//cellular lipid metabolic process;GO:0043436//oxoacid metabolic process;GO:0009987//cellular process;GO:0009755//hormone-mediated signaling pathway;GO:0050789//regulation of biological process;GO:0071310//cellular response to organic substance;GO:0032870//cellular response to hormone sti…
Unigene0001389	0	0	0	0	0	0	0	0	PREDICTED: abscisic acid receptor PYL2 isoform X2 [Cucumis melo]	ko04075//Plant hormone signal transduction//Signal transduction//Environmental Information Processing	GO:0043226//organelle;GO:0044424//intracellular part;GO:0043231//intracellular membrane-bounded organelle;GO:0044464//cell part;GO:0043229//intracellular organelle;GO:0043227//membrane-bounded organelle;GO:0005622//intracellular;GO:0005623//cell	GO:0005488//binding;GO:0019840//isoprenoid binding;GO:0046983//protein dimerization activity;GO:0008289//lipid binding;GO:0005515//protein binding;GO:0060089//molecular transducer activity	GO:0044763//single-organism cellular process;GO:0050789//regulation of biological process;GO:0032870//cellular response to hormone stimulus;GO:0009719//response to endogenous stimulus;GO:0071495//cellular response to endogenous stimulus;GO:0010033//response to organic substance;GO:0044700//single organism signaling;GO:0050896//response to stimulus;GO:0065007//biological regulation;GO:0044699//sin…
Unigene0001390	0.4187	1.6058	0.4161	0.6841	2	7	2	3	--	-	-	-	-
Unigene0001391	0.6646	1.8205	1.486	0.7239	4	10	9	4	PREDICTED: protein NRT1/ PTR FAMILY 5.2-like [Cucumis sativus]	-	-	-	GO:0051179//localization;GO:0051234//establishment of localization
Unigene0001392	0	0	0	0	0	0	0	0	--	-	-	-	-
Unigene0001393	0	0	0	0	0	0	0	0	--	-	-	-	-
Unigene0001394	1.4089	1.1026	0	0	7	5	0	0	--	-	-	-	-
Unigene0001395	59.3207	53.0655	61.4931	60.6854	741	605	773	696	PREDICTED: NADH dehydrogenase [ubiquinone] 1 beta subcomplex subunit 7 [Cucumis sativus]	ko00190//Oxidative phosphorylation//Energy metabolism//Metabolism	GO:0043226//organelle;GO:0031970//organelle envelope lumen;GO:0031975//envelope;GO:0005740//mitochondrial envelope;GO:0005739//mitochondrion;GO:0044444//cytoplasmic part;GO:0031966//mitochondrial membrane;GO:0016020//membrane;GO:0043231//intracellular membrane-bounded organelle;GO:0031967//organelle envelope;GO:1990204//oxidoreductase complex;GO:0031090//organelle membrane;GO:0044422//organelle p…	GO:0003954//NADH dehydrogenase activity;GO:0003824//catalytic activity;GO:0016491//oxidoreductase activity;GO:0050136//NADH dehydrogenase (quinone) activity;GO:0016651//oxidoreductase activity, acting on NAD(P)H;GO:0016655//oxidoreductase activity, acting on NAD(P)H, quinone or similar compound as acceptor	GO:0044710//single-organism metabolic process;GO:0009056//catabolic process;GO:0044238//primary metabolic process;GO:0051603//proteolysis involved in cellular protein catabolic process;GO:0042221//response to chemical;GO:0044723//single-organism carbohydrate metabolic process;GO:0065003//macromolecular complex assembly;GO:0008152//metabolic process;GO:0006508//proteolysis;GO:0043623//cellular pro…
Unigene0001396	2.1346	0.7796	0.4714	0	9	3	2	0	--	-	-	-	-
Unigene0001397	0.5716	1.2525	1.704	0.8301	3	6	9	4	--	-	-	-	-
Unigene0001398	4.2181	2.8295	0.8554	0.375	49	30	10	4	--	-	-	-	-
Unigene0001399	2.2864	2.063	0.2673	0.293	17	14	2	2	--	-	-	-	-
Unigene0001400	1.6874	0	1.8863	0	8	0	9	0	--	-	-	-	-
Unigene0001401	1.8697	2.268	1.9906	0.4364	28	31	30	6	--	-	-	-	-
Unigene0001402	0.7123	0	0	0	4	0	0	0	--	-	-	-	-
Unigene0001403	1.1019	0	1.9161	0.3	8	0	14	2	--	-	-	-	-
Unigene0001404	1.0431	1.8285	1.4511	0.6816	5	8	7	3	PREDICTED: pentatricopeptide repeat-containing protein At5g48910 isoform X1 [Cucumis melo]	-	GO:0044464//cell part;GO:0043227//membrane-bounded organelle;GO:0005737//cytoplasm;GO:0043231//intracellular membrane-bounded organelle;GO:0005623//cell;GO:0043226//organelle;GO:0009536//plastid;GO:0044444//cytoplasmic part;GO:0044424//intracellular part;GO:0005622//intracellular;GO:0043229//intracellular organelle	-	GO:0046483//heterocycle metabolic process;GO:0043170//macromolecule metabolic process;GO:0007010//cytoskeleton organization;GO:0016070//RNA metabolic process;GO:0006807//nitrogen compound metabolic process;GO:0044763//single-organism cellular process;GO:0044260//cellular macromolecule metabolic process;GO:0000226//microtubule cytoskeleton organization;GO:0006996//organelle organization;GO:0006725…
Unigene0001405	0.3492	1.403	1.8509	1.5215	3	11	16	12	PREDICTED: pentatricopeptide repeat-containing protein At5g48910 isoform X2 [Cucumis sativus]	-	-	GO:0042623//ATPase activity, coupled;GO:0016887//ATPase activity;GO:0016817//hydrolase activity, acting on acid anhydrides;GO:0016787//hydrolase activity;GO:0003824//catalytic activity;GO:0017111//nucleoside-triphosphatase activity;GO:0016818//hydrolase activity, acting on acid anhydrides, in phosphorus-containing anhydrides;GO:0016462//pyrophosphatase activity	GO:0008152//metabolic process;GO:0009987//cellular process
Unigene0001406	0.9195	2.0148	0	0	6	12	0	0	--	-	-	-	-
Unigene0001407	0.5149	0	2.0468	0.2804	2	0	8	1	--	-	-	-	-
Unigene0001408	0.7621	0.835	0	0.2767	3	3	0	1	--	-	-	-	-
Unigene0001409	2.349	1.9303	1.5562	0.7462	48	36	32	14	hypothetical retrotransposon [Ipomoea batatas]	-	-	GO:0005488//binding	-
Unigene0001410	2.1239	0.9017	0.8442	0.2892	80	31	32	10	PREDICTED: thioredoxin-like 2, chloroplastic [Cucumis sativus]	-	GO:0043227//membrane-bounded organelle;GO:0044444//cytoplasmic part;GO:0044424//intracellular part;GO:0005622//intracellular;GO:0043229//intracellular organelle;GO:0005623//cell;GO:0043231//intracellular membrane-bounded organelle;GO:0009536//plastid;GO:0005737//cytoplasm;GO:0043226//organelle;GO:0044464//cell part	GO:0016667//oxidoreductase activity, acting on a sulfur group of donors;GO:0016491//oxidoreductase activity;GO:0003824//catalytic activity;GO:0015036//disulfide oxidoreductase activity	GO:0044763//single-organism cellular process;GO:0009987//cellular process;GO:0044699//single-organism process;GO:0044710//single-organism metabolic process;GO:0019725//cellular homeostasis;GO:0018904//ether metabolic process;GO:0042592//homeostatic process;GO:0065007//biological regulation;GO:0065008//regulation of biological quality;GO:0008152//metabolic process;GO:0071704//organic substance met…
Unigene0001411	3.7237	3.2639	3.7003	3.5487	80	64	80	70	PREDICTED: thioredoxin-like 2, chloroplastic [Cucumis sativus]	-	GO:0044424//intracellular part;GO:0044444//cytoplasmic part;GO:0043231//intracellular membrane-bounded organelle;GO:0043229//intracellular organelle;GO:0005623//cell;GO:0009536//plastid;GO:0043227//membrane-bounded organelle;GO:0044464//cell part;GO:0005622//intracellular;GO:0005737//cytoplasm;GO:0043226//organelle	GO:0016491//oxidoreductase activity;GO:0015036//disulfide oxidoreductase activity;GO:0003824//catalytic activity;GO:0016667//oxidoreductase activity, acting on a sulfur group of donors	GO:0008152//metabolic process;GO:0009987//cellular process;GO:0044710//single-organism metabolic process;GO:0044281//small molecule metabolic process;GO:0018904//ether metabolic process;GO:0065007//biological regulation;GO:0044763//single-organism cellular process;GO:0019725//cellular homeostasis;GO:0071704//organic substance metabolic process;GO:0044699//single-organism process;GO:0065008//regul…
Unigene0001412	1.6978	1.8602	0.2812	0	6	6	1	0	PREDICTED: small nuclear ribonucleoprotein E-like isoform X1 [Cucumis melo]	ko03040//Spliceosome//Transcription//Genetic Information Processing	-	-	-
Unigene0001413	36.253	33.4578	41.6271	41.7022	463	390	535	489	PREDICTED: small nuclear ribonucleoprotein E-like [Cucumis sativus]	ko03040//Spliceosome//Transcription//Genetic Information Processing	GO:0032991//macromolecular complex;GO:0030529//ribonucleoprotein complex;GO:0005623//cell;GO:0005622//intracellular;GO:0044464//cell part;GO:0019012//virion;GO:0044424//intracellular part;GO:0044423//virion part	-	GO:0046483//heterocycle metabolic process;GO:0016070//RNA metabolic process;GO:0006807//nitrogen compound metabolic process;GO:0010467//gene expression;GO:0043170//macromolecule metabolic process;GO:0008380//RNA splicing;GO:0044238//primary metabolic process;GO:0090304//nucleic acid metabolic process;GO:1901360//organic cyclic compound metabolic process;GO:0006139//nucleobase-containing compound …
Unigene0001414	75.1609	81.0782	82.7304	65.3336	2526	2487	2798	2016	Polyketide cyclase/dehydrase and lipid transport superfamily protein isoform 2 [Theobroma cacao]	-	-	GO:0005488//binding	-
Unigene0001415	0.9219	1.0101	0.4581	1.0041	4	4	2	4	--	-	-	-	-
Unigene0001416	0	0	0.6998	2.4288	0	0	6	19	PREDICTED: geraniol 8-hydroxylase-like [Cucumis sativus]	-	-	GO:0097159//organic cyclic compound binding;GO:0046914//transition metal ion binding;GO:0043169//cation binding;GO:0043167//ion binding;GO:0016491//oxidoreductase activity;GO:0005488//binding;GO:0046906//tetrapyrrole binding;GO:0046872//metal ion binding;GO:1901363//heterocyclic compound binding;GO:0003824//catalytic activity	GO:0008152//metabolic process;GO:0044710//single-organism metabolic process;GO:0044699//single-organism process
Unigene0001417	0	0	1.2381	2.7141	0	0	8	16	PREDICTED: geraniol 8-hydroxylase-like [Cucumis melo]	-	-	GO:0003824//catalytic activity;GO:0043169//cation binding;GO:0046906//tetrapyrrole binding;GO:0046914//transition metal ion binding;GO:0043167//ion binding;GO:0016491//oxidoreductase activity;GO:0097159//organic cyclic compound binding;GO:0046872//metal ion binding;GO:1901363//heterocyclic compound binding;GO:0005488//binding	GO:0044699//single-organism process;GO:0008152//metabolic process;GO:0044710//single-organism metabolic process
Unigene0001418	60.8084	21.4956	46.8901	38.4469	1683	543	1306	977	PREDICTED: vitellogenin-2 [Cicer arietinum]	-	-	-	-
Unigene0001419	0	0	0	0	0	0	0	0	PREDICTED: MND1-interacting protein 1 [Cucumis melo]	-	-	GO:0043167//ion binding;GO:0005488//binding;GO:0043169//cation binding;GO:0046872//metal ion binding	-
Unigene0001420	17.2261	8.7457	8.4292	9.831	792	367	390	415	PREDICTED: MND1-interacting protein 1 [Cucumis melo]	-	-	GO:0043169//cation binding;GO:0043167//ion binding;GO:0046914//transition metal ion binding;GO:0046872//metal ion binding;GO:0005488//binding	-
Unigene0001421	0	0	0.5642	0	0	0	3	0	--	-	-	-	-
Unigene0001422	37.536	17.4113	30.7793	14.0226	1207	511	996	414	PREDICTED: transcription factor DIVARICATA-like [Cucumis melo]	-	GO:0005622//intracellular;GO:0044424//intracellular part;GO:0043229//intracellular organelle;GO:0005623//cell;GO:0043231//intracellular membrane-bounded organelle;GO:0043226//organelle;GO:0043227//membrane-bounded organelle;GO:0044464//cell part	GO:0005488//binding;GO:0097159//organic cyclic compound binding;GO:1901363//heterocyclic compound binding;GO:0003676//nucleic acid binding	-
Unigene0001423	0	0	0	0	0	0	0	0	PREDICTED: microtubule-associated protein RP/EB family member 1C-like [Cucumis sativus]	-	GO:0044424//intracellular part;GO:0044464//cell part;GO:0043229//intracellular organelle;GO:0043226//organelle;GO:0030312//external encapsulating structure;GO:0005623//cell;GO:0043228//non-membrane-bounded organelle;GO:0043232//intracellular non-membrane-bounded organelle;GO:0015630//microtubule cytoskeleton;GO:0043231//intracellular membrane-bounded organelle;GO:0005737//cytoplasm;GO:0005622//in…	GO:0008092//cytoskeletal protein binding;GO:0015631//tubulin binding;GO:0005488//binding;GO:0005515//protein binding	GO:0071840//cellular component organization or biogenesis;GO:0019538//protein metabolic process;GO:0016043//cellular component organization;GO:1902589//single-organism organelle organization;GO:0044699//single-organism process;GO:0000280//nuclear division;GO:0044710//single-organism metabolic process;GO:0009612//response to mechanical stimulus;GO:0048285//organelle fission;GO:0036211//protein mod…
Unigene0001424	0	0	0.2277	0	0	0	2	0	PREDICTED: microtubule-associated protein RP/EB family member 1C-like [Cucumis melo]	-	GO:0005622//intracellular;GO:0043229//intracellular organelle;GO:0044444//cytoplasmic part;GO:0005856//cytoskeleton;GO:0005623//cell;GO:0030312//external encapsulating structure;GO:0043231//intracellular membrane-bounded organelle;GO:0043227//membrane-bounded organelle;GO:0043232//intracellular non-membrane-bounded organelle;GO:0015630//microtubule cytoskeleton;GO:0005737//cytoplasm;GO:0043226//o…	GO:0005488//binding;GO:0005515//protein binding;GO:0008092//cytoskeletal protein binding;GO:0015631//tubulin binding	GO:0006996//organelle organization;GO:0022414//reproductive process;GO:0071840//cellular component organization or biogenesis;GO:0007010//cytoskeleton organization;GO:0019538//protein metabolic process;GO:0009605//response to external stimulus;GO:0044260//cellular macromolecule metabolic process;GO:0071704//organic substance metabolic process;GO:0016569//covalent chromatin modification;GO:0003006…
Unigene0001425	0.7635	0.7807	2.1749	0.887	15	14	43	16	PREDICTED: microtubule-associated protein RP/EB family member 1C-like [Cucumis melo]	-	GO:0043231//intracellular membrane-bounded organelle;GO:0005623//cell;GO:0043227//membrane-bounded organelle;GO:0005622//intracellular;GO:0005856//cytoskeleton;GO:0071944//cell periphery;GO:0043232//intracellular non-membrane-bounded organelle;GO:0044444//cytoplasmic part;GO:0030312//external encapsulating structure;GO:0043229//intracellular organelle;GO:0015630//microtubule cytoskeleton;GO:00444…	GO:0005515//protein binding;GO:0015631//tubulin binding;GO:0008092//cytoskeletal protein binding;GO:0005488//binding	GO:0000280//nuclear division;GO:0044267//cellular protein metabolic process;GO:0044238//primary metabolic process;GO:0009987//cellular process;GO:0044699//single-organism process;GO:0007010//cytoskeleton organization;GO:0009628//response to abiotic stimulus;GO:0043933//macromolecular complex subunit organization;GO:0043412//macromolecule modification;GO:0009612//response to mechanical stimulus;GO…
Unigene0001426	0.1201	1.5788	2.5655	3.7274	2	24	43	57	--	-	-	-	-
Unigene0001427	0.202	0.7745	2.1074	4.6196	2	7	21	42	orf120b (mitochondrion) [Beta vulgaris subsp. vulgaris]	-	-	GO:0005488//binding	-
Unigene0001428	1.4335	0.3926	1.7805	1.9516	8	2	10	10	--	-	-	-	-
Unigene0001429	85.801	78.6911	81.9889	93.5853	1381	1156	1328	1383	PREDICTED: succinate dehydrogenase subunit 5, mitochondrial [Cucumis sativus]	-	GO:0044444//cytoplasmic part;GO:0044464//cell part;GO:0005737//cytoplasm;GO:0043229//intracellular organelle;GO:0005623//cell;GO:0043231//intracellular membrane-bounded organelle;GO:0005622//intracellular;GO:0043227//membrane-bounded organelle;GO:0005739//mitochondrion;GO:0043226//organelle;GO:0044424//intracellular part	-	GO:0009987//cellular process;GO:0008152//metabolic process;GO:0044237//cellular metabolic process
Unigene0001430	0.4658	0.8166	2.4072	1.5221	10	16	52	30	PREDICTED: zinc finger BED domain-containing protein DAYSLEEPER-like [Cucumis sativus]	-	-	GO:1901363//heterocyclic compound binding;GO:0005488//binding;GO:0097159//organic cyclic compound binding;GO:0005515//protein binding;GO:0003676//nucleic acid binding	-
Unigene0001431	0.1951	0	2.1324	0.4249	1	0	11	2	PREDICTED: zinc finger BED domain-containing protein DAYSLEEPER-like [Cucumis sativus]	-	-	GO:0005515//protein binding;GO:0003676//nucleic acid binding;GO:0097159//organic cyclic compound binding;GO:0005488//binding;GO:1901363//heterocyclic compound binding	-
Unigene0001432	1.8713	0.9319	0.8452	1.1117	11	5	5	6	--	-	-	-	-
Unigene0001433	184.227	105.524	53.5573	52.1533	6098	3188	1784	1585	PREDICTED: patellin-6 [Cucumis sativus]	-	GO:0031224//intrinsic component of membrane;GO:0044424//intracellular part;GO:0044464//cell part;GO:0005623//cell;GO:0044425//membrane part;GO:0005622//intracellular;GO:0016020//membrane	GO:0005488//binding	GO:0051179//localization;GO:0044763//single-organism cellular process;GO:0044699//single-organism process;GO:0009987//cellular process;GO:0051234//establishment of localization
Unigene0001434	0	0.8029	1.4564	0.3991	0	4	8	2	--	-	-	-	-
Unigene0001435	0	0.497	0	0	0	2	0	0	--	-	-	-	-
Unigene0001436	0	0	0	0	0	0	0	0	--	-	-	-	-
Unigene0001437	17.5875	14.2153	16.9038	18.0563	244	180	236	230	NHL domain protein [Medicago truncatula]	-	-	-	-
Unigene0001438	1.4719	0.5376	0.7313	0	6	2	3	0	--	-	-	-	-
Unigene0001439	3.2215	0.6051	1.2805	0.5012	35	6	14	5	PREDICTED: adenylosuccinate synthetase, chloroplastic [Cucumis melo]	ko00230//Purine metabolism//Nucleotide metabolism//Metabolism;ko00250//Alanine, aspartate and glutamate metabolism//Amino acid metabolism//Metabolism	GO:0043226//organelle;GO:0009532//plastid stroma;GO:0043229//intracellular organelle;GO:0005622//intracellular;GO:0005623//cell;GO:0044446//intracellular organelle part;GO:0044435//plastid part;GO:0044464//cell part;GO:0044444//cytoplasmic part;GO:0044422//organelle part;GO:0043227//membrane-bounded organelle;GO:0043231//intracellular membrane-bounded organelle;GO:0044424//intracellular part;GO:0…	GO:0043169//cation binding;GO:0036094//small molecule binding;GO:0097367//carbohydrate derivative binding;GO:0016879//ligase activity, forming carbon-nitrogen bonds;GO:0043167//ion binding;GO:0016874//ligase activity;GO:0097159//organic cyclic compound binding;GO:0001882//nucleoside binding;GO:0005488//binding;GO:0032549//ribonucleoside binding;GO:0032550//purine ribonucleoside binding;GO:0046872…	GO:0006796//phosphate-containing compound metabolic process;GO:0006807//nitrogen compound metabolic process;GO:0071704//organic substance metabolic process;GO:0046129//purine ribonucleoside biosynthetic process;GO:0034641//cellular nitrogen compound metabolic process;GO:0006164//purine nucleotide biosynthetic process;GO:0046390//ribose phosphate biosynthetic process;GO:0090407//organophosphate bi…
Unigene0001440	9.778	2.3263	0.3331	0.1217	175	38	6	2	PREDICTED: ankyrin repeat-containing protein At3g12360-like [Cucumis melo]	-	-	-	-
Unigene0001441	1.7987	0.6569	1.986	0	9	3	10	0	--	-	-	-	-
Unigene0001442	0	0	2.1893	1.3331	0	0	18	10	PREDICTED: TMV resistance protein N-like [Cucumis melo]	-	-	-	-
Unigene0001443	27.6429	21.4479	12.8036	10.9935	1446	1024	674	528	PREDICTED: protein IQ-DOMAIN 32 [Cucumis melo]	-	GO:0044424//intracellular part;GO:0044464//cell part;GO:0005623//cell;GO:0005622//intracellular	-	-
Unigene0001444	1.6936	1.3917	1.0518	0	8	6	5	0	--	-	-	-	-
Unigene0001445	5.1187	3.2715	3.0731	2.4391	48	28	29	21	--	-	-	-	-
Unigene0001446	1.9813	0.6512	1.3782	0.1079	20	6	14	1	--	-	-	-	-
Unigene0001447	2.5504	1.6437	1.6399	0.1634	17	10	11	1	At2g06190 [Arabidopsis thaliana]	-	-	-	-
Unigene0001448	0.9771	2.294	2.1499	1.2162	14	30	31	16	PREDICTED: wall-associated receptor kinase-like 1 isoform X1 [Prunus mume]	-	-	GO:0003824//catalytic activity;GO:0097367//carbohydrate derivative binding;GO:0097159//organic cyclic compound binding;GO:0016772//transferase activity, transferring phosphorus-containing groups;GO:0032549//ribonucleoside binding;GO:0001883//purine nucleoside binding;GO:1901363//heterocyclic compound binding;GO:0004672//protein kinase activity;GO:0016773//phosphotransferase activity, alcohol grou…	GO:0006793//phosphorus metabolic process;GO:0043412//macromolecule modification;GO:0043170//macromolecule metabolic process;GO:0044238//primary metabolic process;GO:0044237//cellular metabolic process;GO:0036211//protein modification process;GO:0044260//cellular macromolecule metabolic process;GO:0044267//cellular protein metabolic process;GO:0008152//metabolic process;GO:0006464//cellular protei…
Unigene0001449	0	0.7076	0.9627	0	0	4	6	0	PREDICTED: wall-associated receptor kinase-like 22 [Jatropha curcas]	-	-	GO:0003824//catalytic activity;GO:0016772//transferase activity, transferring phosphorus-containing groups;GO:0005488//binding;GO:0016301//kinase activity;GO:0004672//protein kinase activity;GO:0016740//transferase activity;GO:0097159//organic cyclic compound binding;GO:0036094//small molecule binding;GO:1901363//heterocyclic compound binding;GO:0016773//phosphotransferase activity, alcohol group…	GO:0009987//cellular process;GO:0008152//metabolic process;GO:0044237//cellular metabolic process
Unigene0001450	2.0873	0	0.6382	0.6995	13	0	4	4	PREDICTED: salicylic acid-binding protein 2-like [Cucumis sativus]	-	-	-	-
Unigene0001451	3.301	3.0456	1.9854	1.23	38	32	23	13	--	-	-	-	-
Unigene0001452	17.3795	10.3672	4.9891	11.147	180	98	52	106	hypothetical protein Csa_1G042280 [Cucumis sativus]	-	-	-	-
Unigene0001453	1.219	0.2968	0.4038	1.1802	9	2	3	8	reverse transcriptase-like protein, partial [Camellia sinensis var. sinensis]	-	-	-	-
Unigene0001454	6.4954	4.5287	4.3421	0.2573	55	35	37	2	--	-	-	-	-
Unigene0001455	19.8517	1.3125	2.891	1.3979	232	14	34	15	PREDICTED: zinc finger Ran-binding domain-containing protein 2 [Cucumis melo]	-	-	GO:0005488//binding;GO:0046914//transition metal ion binding;GO:0046872//metal ion binding;GO:0043167//ion binding;GO:0043169//cation binding	-
Unigene0001456	1.5933	0.4364	0	0.2169	8	2	0	1	--	-	-	-	-
Unigene0001457	1.638	1.6058	0.514	0.6573	19	17	6	7	Replication factor C subunit 3 [Glycine soja]	ko03420//Nucleotide excision repair//Replication and repair//Genetic Information Processing;ko03030//DNA replication//Replication and repair//Genetic Information Processing;ko03430//Mismatch repair//Replication and repair//Genetic Information Processing	-	GO:0003676//nucleic acid binding;GO:0097159//organic cyclic compound binding;GO:1901363//heterocyclic compound binding;GO:0005488//binding	GO:0090304//nucleic acid metabolic process;GO:0044237//cellular metabolic process;GO:0006259//DNA metabolic process;GO:0044238//primary metabolic process;GO:1901360//organic cyclic compound metabolic process;GO:0044260//cellular macromolecule metabolic process;GO:0006725//cellular aromatic compound metabolic process;GO:0043170//macromolecule metabolic process;GO:0046483//heterocycle metabolic pro…
Unigene0001458	0.5873	0.8579	0	1.066	3	4	0	5	PREDICTED: myb-like protein X-like [Citrus sinensis]	-	-	GO:0015036//disulfide oxidoreductase activity;GO:0016667//oxidoreductase activity, acting on a sulfur group of donors;GO:0016491//oxidoreductase activity;GO:0003824//catalytic activity	GO:0044763//single-organism cellular process;GO:0009987//cellular process;GO:0019725//cellular homeostasis;GO:0065007//biological regulation;GO:0042592//homeostatic process;GO:0044710//single-organism metabolic process;GO:0044699//single-organism process;GO:0065008//regulation of biological quality;GO:0008152//metabolic process
Unigene0001459	0	2.1745	0.3944	0	0	10	2	0	PREDICTED: uncharacterized protein At3g28850 [Cucumis melo]	-	-	GO:0003824//catalytic activity;GO:0016667//oxidoreductase activity, acting on a sulfur group of donors;GO:0015036//disulfide oxidoreductase activity;GO:0016491//oxidoreductase activity	GO:0009987//cellular process;GO:0044699//single-organism process;GO:0044763//single-organism cellular process;GO:0008152//metabolic process;GO:0042592//homeostatic process;GO:0065007//biological regulation;GO:0065008//regulation of biological quality;GO:0044710//single-organism metabolic process;GO:0019725//cellular homeostasis
Unigene0001460	1.2991	1.4233	0.4303	0	6	6	2	0	PREDICTED: auxin-induced protein AUX22-like [Cucumis melo]	ko04075//Plant hormone signal transduction//Signal transduction//Environmental Information Processing	-	-	GO:0044260//cellular macromolecule metabolic process;GO:0044249//cellular biosynthetic process;GO:0065007//biological regulation;GO:0050789//regulation of biological process;GO:0009987//cellular process;GO:0034645//cellular macromolecule biosynthetic process;GO:0009058//biosynthetic process;GO:0071704//organic substance metabolic process;GO:0009059//macromolecule biosynthetic process;GO:0050794//…
Unigene0001461	0.7013	0	0.6969	1.1458	4	0	4	6	PREDICTED: cytochrome b5 domain-containing protein RLF [Cucumis sativus]	ko00520//Amino sugar and nucleotide sugar metabolism//Carbohydrate metabolism//Metabolism	-	-	-
Unigene0001462	0	0	0	0	0	0	0	0	PREDICTED: cytochrome b5 domain-containing protein RLF [Cucumis sativus]	ko00520//Amino sugar and nucleotide sugar metabolism//Carbohydrate metabolism//Metabolism	-	-	-
Unigene0001463	26.3641	24.6681	27.2692	26.851	1541	1316	1604	1441	PREDICTED: pre-mRNA-processing factor 6 [Cucumis melo]	ko03040//Spliceosome//Transcription//Genetic Information Processing	GO:0043226//organelle;GO:0043231//intracellular membrane-bounded organelle;GO:0044464//cell part;GO:0005622//intracellular;GO:0044424//intracellular part;GO:0043229//intracellular organelle;GO:0005623//cell;GO:0043227//membrane-bounded organelle	-	GO:0006807//nitrogen compound metabolic process;GO:0050896//response to stimulus;GO:1901360//organic cyclic compound metabolic process;GO:0006725//cellular aromatic compound metabolic process;GO:0008380//RNA splicing;GO:0071704//organic substance metabolic process;GO:0046483//heterocycle metabolic process;GO:0044237//cellular metabolic process;GO:0006950//response to stress;GO:0044260//cellular m…
Unigene0001464	1.9267	0.8796	1.5955	0.5246	12	5	10	3	--	-	-	-	-
Unigene0001465	2.9565	0.4319	0.1959	0	15	2	1	0	--	-	-	-	-
Unigene0001466	0.8426	1.5387	1.1165	0.153	6	10	8	1	--	-	-	-	-
Unigene0001467	0.5496	2.0072	0.9102	0	3	10	5	0	--	-	-	-	-
Unigene0001468	1.5589	1.5182	0.5164	0.1887	9	8	3	1	--	-	-	-	-
Unigene0001469	1.441	2.4998	0.2387	0	12	19	2	0	--	-	-	-	-
Unigene0001470	0.3859	0.9513	0.8628	1.9964	8	18	18	38	PREDICTED: kinesin-like protein KIF21A [Populus euphratica]	-	-	-	-
Unigene0001471	2.1677	2.625	6.859	7.8285	38	42	121	126	PREDICTED: kinesin-like protein KIF21A [Populus euphratica]	-	-	-	-
Unigene0001472	2.3934	0.4628	0.5596	0.3067	17	3	4	2	--	-	-	-	-
Unigene0001473	1.1489	1.1015	2.5688	2.0335	8	7	18	13	PREDICTED: serine/threonine-protein kinase TIO-like, partial [Brassica rapa]	-	-	GO:0005488//binding	-
Unigene0001474	287.782	225.209	157.694	202.886	9274	6624	5114	6003	PREDICTED: tubulin alpha-3 chain-like [Cucumis melo]	ko04145//Phagosome//Transport and catabolism//Cellular Processes	GO:0043228//non-membrane-bounded organelle;GO:0043232//intracellular non-membrane-bounded organelle;GO:0044464//cell part;GO:0032991//macromolecular complex;GO:0005856//cytoskeleton;GO:0005622//intracellular;GO:0043226//organelle;GO:0005623//cell;GO:0015630//microtubule cytoskeleton;GO:0043229//intracellular organelle;GO:0044424//intracellular part	GO:0036094//small molecule binding;GO:0001883//purine nucleoside binding;GO:0032550//purine ribonucleoside binding;GO:0016787//hydrolase activity;GO:0097159//organic cyclic compound binding;GO:0003824//catalytic activity;GO:0005488//binding;GO:0032549//ribonucleoside binding;GO:0016462//pyrophosphatase activity;GO:0097367//carbohydrate derivative binding;GO:0017111//nucleoside-triphosphatase acti…	GO:0044699//single-organism process;GO:0065003//macromolecular complex assembly;GO:0070271//protein complex biogenesis;GO:0009987//cellular process;GO:0044085//cellular component biogenesis;GO:0016043//cellular component organization;GO:0071840//cellular component organization or biogenesis;GO:0034622//cellular macromolecular complex assembly;GO:0044763//single-organism cellular process;GO:002260…
Unigene0001475	10.7465	6.2334	17.225	27.4313	323	171	521	757	Os06g0163300 [Oryza sativa Japonica Group]	-	-	-	-
Unigene0001476	0.2488	0	0.3708	0.4065	4	0	6	6	Os06g0163300 [Oryza sativa Japonica Group]	-	-	-	-
Unigene0001477	1.4874	0.6984	0.4223	0	7	3	2	0	--	-	-	-	-
Unigene0001478	0.2748	1.2043	1.775	0	2	8	13	0	PREDICTED: reticulon-like protein B9 [Vitis vinifera]	-	GO:0016020//membrane	-	-
Unigene0001479	0.5359	1.3699	1.2425	1.7509	3	7	7	9	PREDICTED: reticulon-like protein B14 isoform X2 [Tarenaya hassleriana]	-	-	-	-
Unigene0001480	0.4865	0	0	0	4	0	0	0	PREDICTED: reticulon-like protein B9 [Vitis vinifera]	-	GO:0043231//intracellular membrane-bounded organelle;GO:0043226//organelle;GO:0044464//cell part;GO:0005623//cell;GO:0044425//membrane part;GO:0016020//membrane;GO:0005622//intracellular;GO:0043227//membrane-bounded organelle;GO:0043229//intracellular organelle;GO:0044424//intracellular part	-	-
Unigene0001481	13.8211	13.0006	14.7988	13.3903	516	443	556	459	PREDICTED: imidazole glycerol phosphate synthase hisHF, chloroplastic isoform X1 [Cucumis sativus]	ko01230//Biosynthesis of amino acids//Global and Overview//Metabolism;ko00340//Histidine metabolism//Amino acid metabolism//Metabolism	GO:0044424//intracellular part;GO:0043226//organelle;GO:0044422//organelle part;GO:0044464//cell part;GO:0005622//intracellular;GO:0044446//intracellular organelle part;GO:0009532//plastid stroma;GO:0044435//plastid part;GO:0043231//intracellular membrane-bounded organelle;GO:0043227//membrane-bounded organelle;GO:0044444//cytoplasmic part;GO:0005623//cell;GO:0005737//cytoplasm;GO:0043229//intrac…	GO:0016861//intramolecular oxidoreductase activity, interconverting aldoses and ketoses;GO:0016763//transferase activity, transferring pentosyl groups;GO:0016757//transferase activity, transferring glycosyl groups;GO:0016830//carbon-carbon lyase activity;GO:0016829//lyase activity;GO:0016853//isomerase activity;GO:0016860//intramolecular oxidoreductase activity;GO:0016740//transferase activity;GO…	GO:0009117//nucleotide metabolic process;GO:0019637//organophosphate metabolic process;GO:0006082//organic acid metabolic process;GO:0006221//pyrimidine nucleotide biosynthetic process;GO:0018130//heterocycle biosynthetic process;GO:0043436//oxoacid metabolic process;GO:0034654//nucleobase-containing compound biosynthetic process;GO:0009064//glutamine family amino acid metabolic process;GO:001943…
Unigene0001482	0	0	0.216	3.5507	0	0	1	15	--	-	-	-	-
Unigene0001483	1.2535	0.2747	0	0.273	5	1	0	1	--	-	-	-	-
Unigene0001484	1.2622	0.7902	0.1792	0.3928	7	4	1	2	PREDICTED: retrovirus-related Pol polyprotein from transposon TNT 1-94 isoform X1 [Tarenaya hassleriana]	-	GO:0043226//organelle;GO:0043227//membrane-bounded organelle;GO:0005623//cell;GO:0005622//intracellular;GO:0043231//intracellular membrane-bounded organelle;GO:0044464//cell part;GO:0043229//intracellular organelle;GO:0044424//intracellular part	GO:0046872//metal ion binding;GO:0043169//cation binding;GO:0097159//organic cyclic compound binding;GO:0046914//transition metal ion binding;GO:0043167//ion binding;GO:0005488//binding;GO:0003824//catalytic activity	GO:0006807//nitrogen compound metabolic process;GO:0009987//cellular process;GO:0046483//heterocycle metabolic process;GO:0006259//DNA metabolic process;GO:0006725//cellular aromatic compound metabolic process;GO:0071704//organic substance metabolic process;GO:0044260//cellular macromolecule metabolic process;GO:0006139//nucleobase-containing compound metabolic process;GO:0008152//metabolic proce…
Unigene0001485	0.5342	1.1706	0	1.1636	2	4	0	4	PREDICTED: uncharacterized protein LOC105435174 [Cucumis sativus]	-	-	-	-
Unigene0001486	0.9219	0.2525	0.4581	0.251	4	1	2	1	--	-	-	-	-
Unigene0001487	0.3658	1.503	0.9088	1.9922	4	15	10	20	PREDICTED: pentatricopeptide repeat-containing protein At2g13600-like [Cucumis melo]	-	-	-	-
Unigene0001488	0	0	0	0	0	0	0	0	polynucleotidyl transferase, ribonuclease H-like superfamily protein [Arabidopsis thaliana]	-	-	-	-
Unigene0001489	0	0	0	0	0	0	0	0	polynucleotidyl transferase, ribonuclease H-like superfamily protein [Arabidopsis thaliana]	-	-	-	-
Unigene0001490	0.9527	0	0.4733	0.5188	4	0	2	2	--	-	-	-	-
Unigene0001491	2.0577	1.7535	0.4544	0	9	7	2	0	--	-	-	-	-
Unigene0001492	1.2337	1.5769	0.2043	0.4479	6	7	1	2	PREDICTED: retrovirus-related Pol polyprotein from transposon TNT 1-94 isoform X3 [Cucumis melo]	-	-	-	-
Unigene0001493	1.8896	0.6901	0.4694	0.686	12	4	3	4	PREDICTED: geraniol 8-hydroxylase-like [Fragaria vesca subsp. vesca]	-	-	-	-
Unigene0001494	1.7964	0.8947	1.7851	0.1779	11	5	11	1	PREDICTED: LOW QUALITY PROTEIN: S-type anion channel SLAH3-like [Malus domestica]	-	-	GO:0005488//binding	-
Unigene0001495	1.8719	1.2086	1.993	2.7669	56	33	60	76	PREDICTED: pentatricopeptide repeat-containing protein At1g02060, chloroplastic-like [Cucumis melo]	-	-	-	-
Unigene0001496	0	0	0	0	0	0	0	0	PREDICTED: pentatricopeptide repeat-containing protein At1g02060, chloroplastic-like [Cucumis melo]	-	-	-	-
Unigene0001497	2.1836	4.5035	0.6382	0.5596	17	32	5	4	--	-	-	-	-
Unigene0001498	2.9244	1.1651	1.0567	0	11	4	4	0	--	-	-	-	-
Unigene0001499	0.9748	4.4664	0	0	11	46	0	0	OSIGBa0161P06.2 [Oryza sativa Indica Group]	-	-	-	-
Unigene0001500	2.3522	1.0309	2.5712	0	10	4	11	0	--	-	-	-	-
Unigene0001501	1.8493	1.1052	0.8353	1.2817	11	6	5	7	--	-	-	-	-
Unigene0001502	0.9001	0.4931	1.1181	0.9804	4	2	5	4	--	-	-	-	-
Unigene0001503	2.5722	1.096	1.136	0.3113	18	7	8	2	--	-	-	-	-
Unigene0001504	0.15	5.7531	4.5718	0	3	105	92	0	PREDICTED: uncharacterized protein LOC105435019 [Cucumis sativus]	-	-	-	-
Unigene0001505	42.5132	35.9103	31.7039	22.16	537	414	403	257	PREDICTED: 50S ribosomal protein L18, chloroplastic [Cucumis melo]	ko03010//Ribosome//Translation//Genetic Information Processing	GO:0044424//intracellular part;GO:0044444//cytoplasmic part;GO:0043227//membrane-bounded organelle;GO:0030529//ribonucleoprotein complex;GO:0032991//macromolecular complex;GO:0005737//cytoplasm;GO:0044464//cell part;GO:0031975//envelope;GO:0043226//organelle;GO:0031967//organelle envelope;GO:0043229//intracellular organelle;GO:0005623//cell;GO:0009536//plastid;GO:0043231//intracellular membrane-b…	GO:0005488//binding;GO:0003723//RNA binding;GO:0097159//organic cyclic compound binding;GO:1901363//heterocyclic compound binding;GO:0003676//nucleic acid binding;GO:0005198//structural molecule activity	GO:0044699//single-organism process;GO:0009653//anatomical structure morphogenesis;GO:1902578//single-organism localization;GO:0009987//cellular process;GO:0009914//hormone transport;GO:0071704//organic substance metabolic process;GO:0071555//cell wall organization;GO:0010817//regulation of hormone levels;GO:0048856//anatomical structure development;GO:0044765//single-organism transport;GO:000681…
Unigene0001506	14.7249	22.8826	17.6588	12.2215	643	912	776	490	PREDICTED: U-box domain-containing protein 14 [Cucumis sativus]	-	GO:0044424//intracellular part;GO:0044464//cell part;GO:0005623//cell;GO:0005622//intracellular	GO:0005515//protein binding;GO:0019787//ubiquitin-like protein transferase activity;GO:0005488//binding;GO:0003824//catalytic activity;GO:0005102//receptor binding;GO:0016740//transferase activity;GO:0033612//receptor serine/threonine kinase binding	GO:0044260//cellular macromolecule metabolic process;GO:0044267//cellular protein metabolic process;GO:0006464//cellular protein modification process;GO:0043170//macromolecule metabolic process;GO:0036211//protein modification process;GO:0008152//metabolic process;GO:0006468//protein phosphorylation;GO:0009987//cellular process;GO:0016310//phosphorylation;GO:0006793//phosphorus metabolic process;…
Unigene0001507	0.0955	0.2093	0	0	2	4	0	0	PREDICTED: U-box domain-containing protein 14 [Cucumis melo]	-	GO:0005623//cell;GO:0005622//intracellular;GO:0044464//cell part;GO:0044424//intracellular part	GO:0016740//transferase activity;GO:0005488//binding;GO:0005102//receptor binding;GO:0003824//catalytic activity;GO:0005515//protein binding;GO:0033612//receptor serine/threonine kinase binding;GO:0019787//ubiquitin-like protein transferase activity	GO:0043170//macromolecule metabolic process;GO:0044260//cellular macromolecule metabolic process;GO:0044237//cellular metabolic process;GO:0006793//phosphorus metabolic process;GO:0009987//cellular process;GO:0036211//protein modification process;GO:0006796//phosphate-containing compound metabolic process;GO:0044267//cellular protein metabolic process;GO:0071704//organic substance metabolic proce…
Unigene0001508	0.4844	0.5307	0.2407	1.319	2	2	1	5	--	-	-	-	-
Unigene0001509	3.0235	4.1015	6.5813	4.3908	21	26	46	28	--	-	-	-	-
Unigene0001510	1.9251	3.8939	2.6487	0.1613	13	24	18	1	--	-	-	-	-
Unigene0001511	0.075	0	0	0	2	0	0	0	S-adenosyl-L-methionine-dependent methyltransferases superfamily protein [Theobroma cacao]	-	-	GO:0003824//catalytic activity;GO:0016740//transferase activity;GO:0016741//transferase activity, transferring one-carbon groups	GO:0044237//cellular metabolic process;GO:0044710//single-organism metabolic process;GO:0043436//oxoacid metabolic process;GO:0009987//cellular process;GO:0032787//monocarboxylic acid metabolic process;GO:0044763//single-organism cellular process;GO:0044281//small molecule metabolic process;GO:0006082//organic acid metabolic process;GO:0008152//metabolic process;GO:0044699//single-organism proces…
Unigene0001512	0	0	0.0743	0	0	0	2	0	S-adenosyl-L-methionine-dependent methyltransferases superfamily protein [Theobroma cacao]	-	-	GO:0016741//transferase activity, transferring one-carbon groups;GO:0016740//transferase activity;GO:0003824//catalytic activity	GO:0044699//single-organism process;GO:0019752//carboxylic acid metabolic process;GO:0008152//metabolic process;GO:0006089//lactate metabolic process;GO:1901615//organic hydroxy compound metabolic process;GO:0044281//small molecule metabolic process;GO:0044237//cellular metabolic process;GO:0044710//single-organism metabolic process;GO:0006082//organic acid metabolic process;GO:0009987//cellular …
Unigene0001513	14.2898	10.1581	15.7213	16.3975	168	109	186	177	PREDICTED: acyl-coenzyme A thioesterase 13 [Cucumis melo]	-	-	-	-
Unigene0001514	2.4289	2.8386	0.8045	0.3527	15	16	5	2	--	-	-	-	-
Unigene0001515	0	0	0	0	0	0	0	0	--	-	-	-	-
Unigene0001516	1.7148	0.835	0.1893	0.415	9	4	1	2	--	-	-	-	-
Unigene0001517	0.9771	0.8921	1.1328	0.5321	6	5	7	3	PREDICTED: sialidase-like [Pyrus x bretschneideri]	-	-	-	-
Unigene0001518	0	0	1.5421	0	0	0	6	0	--	-	-	-	-
Unigene0001519	0.5244	0.5746	0	0	2	2	0	0	--	-	-	-	-
Unigene0001520	2.901	3.5758	1.7567	1.5798	64	72	39	32	PREDICTED: ankyrin-1 [Cucumis melo]	-	-	-	-
Unigene0001521	2.2682	0	0.4508	0	10	0	2	0	--	-	-	-	-
Unigene0001522	0.7328	0.2676	0.7282	0.266	3	1	3	1	PREDICTED: G-type lectin S-receptor-like serine/threonine-protein kinase SD2-5 [Cucumis melo]	-	GO:0016020//membrane	GO:0032550//purine ribonucleoside binding;GO:0036094//small molecule binding;GO:0016773//phosphotransferase activity, alcohol group as acceptor;GO:0016772//transferase activity, transferring phosphorus-containing groups;GO:0016301//kinase activity;GO:0097159//organic cyclic compound binding;GO:0005488//binding;GO:0003824//catalytic activity;GO:0004672//protein kinase activity;GO:0005515//protein …	GO:0044260//cellular macromolecule metabolic process;GO:0071704//organic substance metabolic process;GO:0006796//phosphate-containing compound metabolic process;GO:0036211//protein modification process;GO:0009987//cellular process;GO:0016310//phosphorylation;GO:0044237//cellular metabolic process;GO:0043170//macromolecule metabolic process;GO:0044267//cellular protein metabolic process;GO:0006468…
Unigene0001523	0	0	0	0	0	0	0	0	--	-	-	-	-
Unigene0001524	1.2426	0.4084	1.6052	0.1353	10	3	13	1	--	-	-	-	-
Unigene0001525	1.1432	1.5309	1.0098	1.1068	9	11	8	8	conserved hypothetical protein [Ricinus communis]	-	-	-	-
Unigene0001526	0.4763	1.5657	0	0	2	6	0	0	polyprotein [Arabidopsis thaliana]	ko04141//Protein processing in endoplasmic reticulum//Folding, sorting and degradation//Genetic Information Processing	GO:0043229//intracellular organelle;GO:0043227//membrane-bounded organelle;GO:0044424//intracellular part;GO:0005623//cell;GO:0043231//intracellular membrane-bounded organelle;GO:0043226//organelle;GO:0005622//intracellular;GO:0044464//cell part	GO:0032550//purine ribonucleoside binding;GO:0043167//ion binding;GO:1901363//heterocyclic compound binding;GO:0097159//organic cyclic compound binding;GO:0001883//purine nucleoside binding;GO:0046872//metal ion binding;GO:0043169//cation binding;GO:0046914//transition metal ion binding;GO:0032549//ribonucleoside binding;GO:0001882//nucleoside binding;GO:0097367//carbohydrate derivative binding;G…	GO:1901360//organic cyclic compound metabolic process;GO:0008152//metabolic process;GO:0090304//nucleic acid metabolic process;GO:0044237//cellular metabolic process;GO:0044238//primary metabolic process;GO:0006259//DNA metabolic process;GO:0043170//macromolecule metabolic process;GO:0034641//cellular nitrogen compound metabolic process;GO:0006139//nucleobase-containing compound metabolic process…
Unigene0001527	9.2704	12.42	12.7441	10.0445	193	236	267	192	PREDICTED: probable DNA-3-methyladenine glycosylase 2 [Cucumis melo]	ko03410//Base excision repair//Replication and repair//Genetic Information Processing	-	GO:0043733//DNA-3-methylbase glycosylase activity;GO:0016798//hydrolase activity, acting on glycosyl bonds;GO:0016799//hydrolase activity, hydrolyzing N-glycosyl compounds;GO:0019104//DNA N-glycosylase activity;GO:0003824//catalytic activity;GO:0016787//hydrolase activity;GO:0003905//alkylbase DNA N-glycosylase activity	GO:0044710//single-organism metabolic process;GO:0044763//single-organism cellular process;GO:0043170//macromolecule metabolic process;GO:0033554//cellular response to stress;GO:0008152//metabolic process;GO:0006807//nitrogen compound metabolic process;GO:0044699//single-organism process;GO:0071704//organic substance metabolic process;GO:0006281//DNA repair;GO:0044238//primary metabolic process;G…
Unigene0001528	0	1.0873	0.9861	0	0	5	5	0	--	-	-	-	-
Unigene0001529	2.6164	1.1026	0.2	0	13	5	1	0	--	-	-	-	-
Unigene0001530	1.5272	1.1952	2.3847	0	7	5	11	0	--	-	-	-	-
Unigene0001531	0	0	0	0	0	0	0	0	--	-	-	-	-
Unigene0001532	0	0	0	0	0	0	0	0	--	-	-	-	-
Unigene0001533	1.0814	0.677	0.9211	0	7	4	6	0	--	-	-	-	-
Unigene0001534	6.7941	10.1949	4.6966	0.9652	92	126	64	12	PREDICTED: glutaredoxin-C9 [Cucumis melo]	-	-	GO:0016491//oxidoreductase activity;GO:0015036//disulfide oxidoreductase activity;GO:0016667//oxidoreductase activity, acting on a sulfur group of donors;GO:0003824//catalytic activity	GO:0042592//homeostatic process;GO:0065007//biological regulation;GO:0065008//regulation of biological quality;GO:0044710//single-organism metabolic process;GO:0009987//cellular process;GO:0019725//cellular homeostasis;GO:0044699//single-organism process;GO:0008152//metabolic process;GO:0044763//single-organism cellular process
Unigene0001535	0	0	0	0	0	0	0	0	PREDICTED: glutaredoxin-C9 [Cucumis melo]	-	-	GO:0016667//oxidoreductase activity, acting on a sulfur group of donors;GO:0015036//disulfide oxidoreductase activity;GO:0016491//oxidoreductase activity;GO:0003824//catalytic activity	GO:0009987//cellular process;GO:0044763//single-organism cellular process;GO:0019725//cellular homeostasis;GO:0044699//single-organism process;GO:0008152//metabolic process;GO:0042592//homeostatic process;GO:0044710//single-organism metabolic process;GO:0065008//regulation of biological quality;GO:0065007//biological regulation
Unigene0001536	4.4612	0.611	3.3249	2.1258	32	4	24	14	--	-	-	-	-
Unigene0001537	0.2926	1.2824	0.4846	1.4873	3	12	5	14	probable xyloglucan endotransglucosylase/hydrolase protein 23-like precursor [Cucumis sativus]	-	GO:0005623//cell;GO:0005576//extracellular region;GO:0071944//cell periphery;GO:0030312//external encapsulating structure;GO:0044464//cell part	GO:0016757//transferase activity, transferring glycosyl groups;GO:0016740//transferase activity;GO:0016798//hydrolase activity, acting on glycosyl bonds;GO:0003824//catalytic activity;GO:0016787//hydrolase activity;GO:0016758//transferase activity, transferring hexosyl groups	GO:0045229//external encapsulating structure organization;GO:0008152//metabolic process;GO:0071840//cellular component organization or biogenesis;GO:0005976//polysaccharide metabolic process;GO:0044238//primary metabolic process;GO:0005975//carbohydrate metabolic process;GO:0043170//macromolecule metabolic process;GO:0009987//cellular process;GO:0016043//cellular component organization;GO:0071704…
Unigene0001538	14.3368	101.149	63.7593	107.871	305	1964	1365	2107	probable xyloglucan endotransglucosylase/hydrolase protein 23-like precursor [Cucumis sativus]	-	GO:0005576//extracellular region;GO:0044464//cell part;GO:0030312//external encapsulating structure;GO:0005623//cell;GO:0071944//cell periphery	GO:0016758//transferase activity, transferring hexosyl groups;GO:0016740//transferase activity;GO:0016787//hydrolase activity;GO:0016798//hydrolase activity, acting on glycosyl bonds;GO:0016757//transferase activity, transferring glycosyl groups;GO:0003824//catalytic activity	GO:0071704//organic substance metabolic process;GO:0043170//macromolecule metabolic process;GO:0044238//primary metabolic process;GO:0016043//cellular component organization;GO:0008152//metabolic process;GO:0044042//glucan metabolic process;GO:0009987//cellular process;GO:0005975//carbohydrate metabolic process;GO:0045229//external encapsulating structure organization;GO:0005976//polysaccharide m…
Unigene0001539	1.309	0.7171	0	0	6	3	0	0	RNA polymerase beta'' subunit, partial (chloroplast) [Datisca cannabina]	ko00230//Purine metabolism//Nucleotide metabolism//Metabolism;ko00240//Pyrimidine metabolism//Nucleotide metabolism//Metabolism;ko03020//RNA polymerase//Transcription//Genetic Information Processing	GO:0043226//organelle;GO:0043231//intracellular membrane-bounded organelle;GO:0044444//cytoplasmic part;GO:0044424//intracellular part;GO:0005623//cell;GO:0005737//cytoplasm;GO:0005622//intracellular;GO:0009536//plastid;GO:0043227//membrane-bounded organelle;GO:0043229//intracellular organelle;GO:0044464//cell part	GO:0016779//nucleotidyltransferase activity;GO:0003824//catalytic activity;GO:0016740//transferase activity;GO:0097159//organic cyclic compound binding;GO:0016772//transferase activity, transferring phosphorus-containing groups;GO:1901363//heterocyclic compound binding;GO:0034062//RNA polymerase activity;GO:0005488//binding;GO:0003676//nucleic acid binding	GO:0043170//macromolecule metabolic process;GO:1901576//organic substance biosynthetic process;GO:0009058//biosynthetic process;GO:0044249//cellular biosynthetic process;GO:0034645//cellular macromolecule biosynthetic process;GO:0044260//cellular macromolecule metabolic process;GO:0009059//macromolecule biosynthetic process;GO:0009987//cellular process;GO:0044237//cellular metabolic process;GO:00…
Unigene0001540	0.083	0	0.1649	0.1807	1	0	2	2	PREDICTED: enoyl-CoA hydratase 2, peroxisomal [Cucumis melo]	-	GO:0044424//intracellular part;GO:0043231//intracellular membrane-bounded organelle;GO:0043226//organelle;GO:0005737//cytoplasm;GO:0043229//intracellular organelle;GO:0005623//cell;GO:0044444//cytoplasmic part;GO:0043227//membrane-bounded organelle;GO:0005622//intracellular;GO:0044464//cell part;GO:0042579//microbody	GO:0016835//carbon-oxygen lyase activity;GO:0003824//catalytic activity;GO:0016491//oxidoreductase activity;GO:0016829//lyase activity;GO:0016836//hydro-lyase activity;GO:0016614//oxidoreductase activity, acting on CH-OH group of donors;GO:0016616//oxidoreductase activity, acting on the CH-OH group of donors, NAD or NADP as acceptor	GO:0072329//monocarboxylic acid catabolic process;GO:0035966//response to topologically incorrect protein;GO:0006082//organic acid metabolic process;GO:0065003//macromolecular complex assembly;GO:0043632//modification-dependent macromolecule catabolic process;GO:0009056//catabolic process;GO:0043436//oxoacid metabolic process;GO:0044763//single-organism cellular process;GO:0071704//organic substa…
Unigene0001541	12.6778	10.4059	18.3127	19.597	291	218	423	413	PREDICTED: enoyl-CoA hydratase 2, peroxisomal [Cucumis melo]	-	GO:0044444//cytoplasmic part;GO:0043226//organelle;GO:0044464//cell part;GO:0005737//cytoplasm;GO:0043229//intracellular organelle;GO:0043231//intracellular membrane-bounded organelle;GO:0044424//intracellular part;GO:0005622//intracellular;GO:0005623//cell;GO:0043227//membrane-bounded organelle;GO:0042579//microbody	GO:0016829//lyase activity;GO:0016614//oxidoreductase activity, acting on CH-OH group of donors;GO:0016835//carbon-oxygen lyase activity;GO:0016616//oxidoreductase activity, acting on the CH-OH group of donors, NAD or NADP as acceptor;GO:0003824//catalytic activity;GO:0016836//hydro-lyase activity;GO:0016491//oxidoreductase activity	GO:0043632//modification-dependent macromolecule catabolic process;GO:0032787//monocarboxylic acid metabolic process;GO:0044248//cellular catabolic process;GO:0022607//cellular component assembly;GO:0050896//response to stimulus;GO:0065003//macromolecular complex assembly;GO:0034622//cellular macromolecular complex assembly;GO:0042221//response to chemical;GO:0030258//lipid modification;GO:004425…
Unigene0001542	1.3028	0	0	1.7736	8	0	0	10	Ty3/gypsy retrotransposon protein [Beta vulgaris subsp. vulgaris]	-	-	-	-
Unigene0001543	0.783	0.8579	0.5187	0.5685	3	3	2	2	PREDICTED: haloacid dehalogenase-like hydrolase domain-containing protein Sgpp isoform X1 [Cucumis melo]	-	-	-	-
Unigene0001544	0	0	0	0	0	0	0	0	--	-	-	-	-
Unigene0001545	3.4899	1.2401	1.031	1.7464	37	12	11	17	--	-	-	-	-
Unigene0001546	1.0867	0	1.0798	0	5	0	5	0	--	-	-	-	-
Unigene0001547	2.1228	2.0674	0.7813	0.8563	54	48	20	20	bZIP-like protein [Oryza sativa Japonica Group]	-	-	-	-
Unigene0001548	2.6882	0	0.4218	0.3082	19	0	3	2	PREDICTED: transposon Tf2-1 polyprotein isoform X1 [Beta vulgaris subsp. vulgaris]	-	GO:0043226//organelle;GO:0005623//cell;GO:0044424//intracellular part;GO:0043227//membrane-bounded organelle;GO:0043231//intracellular membrane-bounded organelle;GO:0005622//intracellular;GO:0043229//intracellular organelle;GO:0044464//cell part	-	GO:0044237//cellular metabolic process;GO:0090304//nucleic acid metabolic process;GO:0034641//cellular nitrogen compound metabolic process;GO:1901360//organic cyclic compound metabolic process;GO:0044238//primary metabolic process;GO:0044260//cellular macromolecule metabolic process;GO:0006725//cellular aromatic compound metabolic process;GO:0043170//macromolecule metabolic process;GO:0009987//ce…
Unigene0001549	7.0798	16.9969	25.5546	36.1736	68	149	247	319	PREDICTED: E3 ubiquitin-protein ligase RNF181-like [Cucumis sativus]	-	-	GO:0005488//binding;GO:0046914//transition metal ion binding;GO:0043167//ion binding;GO:0046872//metal ion binding;GO:0043169//cation binding	-
Unigene0001550	0	0	0	0	0	0	0	0	BnaA01g16370D [Brassica napus]	-	-	-	-
Unigene0001551	12.854	15.1621	24.6765	19.4211	235	253	454	326	BnaC01g19520D [Brassica napus]	-	-	-	-
Unigene0001552	1.6126	0.9816	1.0683	0	9	5	6	0	--	-	-	-	-
Unigene0001553	0.7902	0	1.047	0	3	0	4	0	--	-	-	-	-
Unigene0001554	0.7672	0	2.0966	0.4178	4	0	11	2	--	-	-	-	-
Unigene0001555	0.1999	0.4379	3.3762	1.0884	1	2	17	5	PREDICTED: auxin efflux carrier component 4-like [Cucumis melo]	-	GO:0031224//intrinsic component of membrane;GO:0044425//membrane part;GO:0016020//membrane	-	GO:0044763//single-organism cellular process;GO:0009987//cellular process;GO:0044699//single-organism process
Unigene0001556	0.7794	0	0.7745	0.283	3	0	3	1	--	-	-	-	-
Unigene0001557	2.0056	0.6592	0	0	10	3	0	0	--	-	-	-	-
Unigene0001558	13.297	10.9431	13.2134	13.2374	221	166	221	202	PREDICTED: auxin-binding protein T85 [Cucumis melo]	-	GO:0012505//endomembrane system;GO:0044432//endoplasmic reticulum part;GO:0043226//organelle;GO:0005783//endoplasmic reticulum;GO:0044464//cell part;GO:0044444//cytoplasmic part;GO:0043231//intracellular membrane-bounded organelle;GO:0043229//intracellular organelle;GO:0044424//intracellular part;GO:0005622//intracellular;GO:0005623//cell;GO:0043227//membrane-bounded organelle;GO:0044446//intrace…	GO:0043169//cation binding;GO:0005488//binding;GO:0060089//molecular transducer activity;GO:0043167//ion binding;GO:0046914//transition metal ion binding;GO:0046872//metal ion binding;GO:0042562//hormone binding	GO:0044767//single-organism developmental process;GO:0044699//single-organism process;GO:0070887//cellular response to chemical stimulus;GO:0007165//signal transduction;GO:0016043//cellular component organization;GO:0010556//regulation of macromolecule biosynthetic process;GO:0032870//cellular response to hormone stimulus;GO:0071840//cellular component organization or biogenesis;GO:0048856//anato…
Unigene0001559	2.3726	0	3.2151	0	11	0	15	0	--	-	-	-	-
Unigene0001560	0.1775	0.5835	2.2931	2.9001	1	3	13	15	--	-	-	-	-
Unigene0001561	0	0.4931	0.2236	2.451	0	2	1	10	--	-	-	-	-
Unigene0001562	2.7349	5.094	0.6794	0	20	34	5	0	--	-	-	-	-
Unigene0001563	0	0	0	0	0	0	0	0	--	-	-	-	-
Unigene0001564	0.1043	0	0	0	2	0	0	0	F21B7.33 [Arabidopsis lyrata subsp. lyrata]	-	-	-	GO:0009987//cellular process;GO:0044699//single-organism process;GO:0044710//single-organism metabolic process;GO:0008152//metabolic process;GO:0044238//primary metabolic process;GO:0009058//biosynthetic process;GO:0006644//phospholipid metabolic process;GO:0044763//single-organism cellular process;GO:0090407//organophosphate biosynthetic process;GO:0044249//cellular biosynthetic process;GO:00447…
Unigene0001565	0.2007	0	0	0	4	0	0	0	F21B7.33 [Arabidopsis lyrata subsp. lyrata]	-	-	-	GO:0008654//phospholipid biosynthetic process;GO:0044763//single-organism cellular process;GO:0006650//glycerophospholipid metabolic process;GO:1901576//organic substance biosynthetic process;GO:0006644//phospholipid metabolic process;GO:0044699//single-organism process;GO:0006796//phosphate-containing compound metabolic process;GO:0046486//glycerolipid metabolic process;GO:0090407//organophospha…
Unigene0001566	0.261	2.5737	2.3342	0	1	9	9	0	--	-	-	-	-
Unigene0001567	0.9607	1.5788	0.716	0	4	6	3	0	--	-	-	-	-
Unigene0001568	0.9073	0.497	1.3524	0.4941	4	2	6	2	--	-	-	-	-
Unigene0001569	1.9512	0.2515	4.106	0.375	17	2	36	3	--	-	-	-	-
[truncated: 56,503 more rows]
