# Supplementary material for: De novo sequencing and analysis of the transcriptome during the browning of fresh-cut Luffa cylindrica 'Fusi-3' fruits
Source: PLoS One. 2017 Nov 16;12(11):e0187117. doi: 10.1371/journal.pone.0187117 (PMC5690621; doi:10.1371/journal.pone.0187117)
Supplement: S4 Table — (XLSX) [file pone.0187117.s004.xlsx]

## Sheet: Sheet1
GeneID	SPOT	Profile	Description	Pathway	GO Component	GO Function	GO Process
UNIGENE0000001	ID_0	5	hypothetical protein Csa_6G318690 [Cucumis sativus]	-	-	-	-
UNIGENE0000002	ID_1	12	--	-	-	-	-
UNIGENE0000003	ID_2	12	--	-	-	-	-
UNIGENE0000005	ID_3	12	PREDICTED: CLAVATA3/ESR (CLE)-related protein 13 [Cucumis melo]	-	GO:0005576//extracellular region	-	GO:0044699//single-organism process
UNIGENE0000006	ID_4	6	--	-	-	-	-
UNIGENE0000007	ID_5	11	PREDICTED: U-box domain-containing protein 52 isoform X2 [Cucumis melo]	-	-	GO:0097367//carbohydrate derivative binding;GO:0016773//phosphotransferase activity, alcohol group as acceptor;GO:1901363//heterocyclic compound binding;GO:0003824//catalytic activity;GO:0016740//transferase activity;GO:0016772//transferase activity, transferring phosphorus-containing groups;GO:0001883//purine nucleoside binding;GO:0032550//purine ribonucleoside binding;GO:0004672//protein kinase…	GO:0044260//cellular macromolecule metabolic process;GO:0006793//phosphorus metabolic process;GO:0036211//protein modification process;GO:0043412//macromolecule modification;GO:0009987//cellular process;GO:0006796//phosphate-containing compound metabolic process;GO:0050896//response to stimulus;GO:0044238//primary metabolic process;GO:0044237//cellular metabolic process;GO:0008152//metabolic proc…
UNIGENE0000008	ID_6	12	--	-	-	-	-
UNIGENE0000012	ID_7	21	Endoglucanase [Medicago truncatula]	-	-	GO:0003824//catalytic activity;GO:0016798//hydrolase activity, acting on glycosyl bonds;GO:0016787//hydrolase activity	GO:0044238//primary metabolic process;GO:0008152//metabolic process
UNIGENE0000013	ID_8	6	--	-	-	-	-
UNIGENE0000018	ID_9	15	Glycerol kinase [Gossypium arboreum]	-	GO:0044464//cell part;GO:0043229//intracellular organelle;GO:0005737//cytoplasm;GO:0044444//cytoplasmic part;GO:0005622//intracellular;GO:0044424//intracellular part;GO:0043227//membrane-bounded organelle;GO:0009536//plastid;GO:0005623//cell;GO:0043226//organelle;GO:0043231//intracellular membrane-bounded organelle	-	-
UNIGENE0000020	ID_10	12	--	-	-	-	-
UNIGENE0000021	ID_11	12	--	-	-	-	-
UNIGENE0000022	ID_12	12	--	-	-	-	-
UNIGENE0000023	ID_13	21	PREDICTED: ethylene-responsive transcription factor ERF003-like [Cucumis sativus]	-	GO:0043229//intracellular organelle;GO:0005623//cell;GO:0043227//membrane-bounded organelle;GO:0005622//intracellular;GO:0043231//intracellular membrane-bounded organelle;GO:0044464//cell part;GO:0043226//organelle;GO:0044424//intracellular part	GO:0005488//binding;GO:1901363//heterocyclic compound binding;GO:0097159//organic cyclic compound binding;GO:0003676//nucleic acid binding;GO:0001071//nucleic acid binding transcription factor activity	GO:0044237//cellular metabolic process;GO:0065007//biological regulation;GO:0050789//regulation of biological process;GO:0044249//cellular biosynthetic process;GO:0008152//metabolic process;GO:0009987//cellular process;GO:0034645//cellular macromolecule biosynthetic process;GO:1901576//organic substance biosynthetic process;GO:0044260//cellular macromolecule metabolic process;GO:0009058//biosynth…
UNIGENE0000024	ID_14	7	--	-	-	-	-
UNIGENE0000027	ID_15	21	serpin-like protein [Medicago truncatula]	-	-	-	-
UNIGENE0000028	ID_16	24	PREDICTED: serpin-ZX-like [Cucumis sativus]	-	-	-	-
UNIGENE0000030	ID_17	12	--	-	-	-	-
UNIGENE0000031	ID_18	14	--	-	-	-	-
UNIGENE0000032	ID_19	7	--	-	-	-	-
UNIGENE0000033	ID_20	21	PREDICTED: 12-oxophytodienoate reductase 2-like [Vitis vinifera]	ko00592//alpha-Linolenic acid metabolism//Lipid metabolism//Metabolism	-	GO:0000166//nucleotide binding;GO:0016627//oxidoreductase activity, acting on the CH-CH group of donors;GO:1901363//heterocyclic compound binding;GO:0003824//catalytic activity;GO:0005488//binding;GO:0016628//oxidoreductase activity, acting on the CH-CH group of donors, NAD or NADP as acceptor;GO:0016491//oxidoreductase activity;GO:0097367//carbohydrate derivative binding;GO:0036094//small molecu…	GO:0044699//single-organism process;GO:0044710//single-organism metabolic process;GO:0008152//metabolic process
UNIGENE0000035	ID_21	2	PREDICTED: vacuolar proton ATPase a3 [Cucumis melo]	ko00190//Oxidative phosphorylation//Energy metabolism//Metabolism;ko04145//Phagosome//Transport and catabolism//Cellular Processes	GO:0044425//membrane part;GO:0043234//protein complex;GO:0016020//membrane;GO:0016469//proton-transporting two-sector ATPase complex;GO:0032991//macromolecular complex;GO:0033177//proton-transporting two-sector ATPase complex, proton-transporting domain;GO:0033176//proton-transporting V-type ATPase complex;GO:0031224//intrinsic component of membrane;GO:0033179//proton-transporting V-type ATPase, …	GO:0003824//catalytic activity;GO:0022892//substrate-specific transporter activity;GO:0008324//cation transmembrane transporter activity;GO:0015075//ion transmembrane transporter activity;GO:0022857//transmembrane transporter activity;GO:0022891//substrate-specific transmembrane transporter activity;GO:0015077//monovalent inorganic cation transmembrane transporter activity;GO:0005215//transporter…	GO:1902600//hydrogen ion transmembrane transport;GO:0044765//single-organism transport;GO:0015672//monovalent inorganic cation transport;GO:0098660//inorganic ion transmembrane transport;GO:0006818//hydrogen transport;GO:0051234//establishment of localization;GO:0015988//energy coupled proton transmembrane transport, against electrochemical gradient;GO:0006811//ion transport;GO:0098662//inorganic…
UNIGENE0000038	ID_22	9	--	-	-	-	-
UNIGENE0000039	ID_23	1	--	-	-	-	-
UNIGENE0000040	ID_24	15	--	-	-	-	-
UNIGENE0000043	ID_25	12	--	-	-	-	-
UNIGENE0000044	ID_26	6	PREDICTED: probable (S)-N-methylcoclaurine 3'-hydroxylase isozyme 2 [Cucumis melo]	-	-	GO:0043167//ion binding;GO:0043169//cation binding;GO:0005488//binding;GO:0003824//catalytic activity;GO:0004497//monooxygenase activity;GO:0016705//oxidoreductase activity, acting on paired donors, with incorporation or reduction of molecular oxygen;GO:0046872//metal ion binding;GO:0016491//oxidoreductase activity	-
UNIGENE0000046	ID_27	12	PREDICTED: soyasapogenol B glucuronide galactosyltransferase-like [Glycine max]	-	-	GO:0003824//catalytic activity;GO:0016740//transferase activity	-
UNIGENE0000048	ID_28	12	--	-	-	-	-
UNIGENE0000050	ID_29	21	BnaA09g50560D [Brassica napus]	-	-	-	-
UNIGENE0000054	ID_30	12	--	-	-	-	-
UNIGENE0000055	ID_31	12	--	-	-	-	-
UNIGENE0000056	ID_32	7	PREDICTED: transposon Ty3-G Gag-Pol polyprotein [Populus euphratica]	-	-	GO:0097159//organic cyclic compound binding;GO:0005488//binding;GO:0003676//nucleic acid binding;GO:1901363//heterocyclic compound binding	GO:0008152//metabolic process
UNIGENE0000058	ID_33	9	PREDICTED: early nodulin-93-like [Cucumis melo]	-	-	-	-
UNIGENE0000059	ID_34	21	SAUR-like auxin-responsive protein [Arabidopsis thaliana]	ko04075//Plant hormone signal transduction//Signal transduction//Environmental Information Processing	-	-	-
UNIGENE0000061	ID_35	12	--	-	-	-	-
UNIGENE0000064	ID_36	19	--	-	-	-	-
UNIGENE0000068	ID_37	9	YUCCA type protein 5 [Cucumis melo]	ko00380//Tryptophan metabolism//Amino acid metabolism//Metabolism	-	GO:0016491//oxidoreductase activity;GO:0016705//oxidoreductase activity, acting on paired donors, with incorporation or reduction of molecular oxygen;GO:0005488//binding;GO:0003824//catalytic activity;GO:0036094//small molecule binding;GO:0004497//monooxygenase activity;GO:1901363//heterocyclic compound binding;GO:0097159//organic cyclic compound binding;GO:0000166//nucleotide binding;GO:0016709/…	GO:0044710//single-organism metabolic process;GO:0008152//metabolic process;GO:0044699//single-organism process
UNIGENE0000069	ID_38	21	PREDICTED: stress enhanced protein 2, chloroplastic [Cucumis melo]	-	GO:0043227//membrane-bounded organelle;GO:0044424//intracellular part;GO:0005623//cell;GO:0044425//membrane part;GO:0005737//cytoplasm;GO:0009579//thylakoid;GO:0009507//chloroplast;GO:0044444//cytoplasmic part;GO:0034357//photosynthetic membrane;GO:0044464//cell part;GO:0005622//intracellular;GO:0016020//membrane;GO:0044436//thylakoid part;GO:0009536//plastid;GO:0043229//intracellular organelle;G…	-	GO:0044237//cellular metabolic process;GO:0009987//cellular process;GO:0008152//metabolic process
UNIGENE0000070	ID_39	2	--	-	-	-	-
UNIGENE0000072	ID_40	20	--	-	-	-	-
UNIGENE0000073	ID_41	21	pentatricopeptide repeat-containing protein [Arabidopsis thaliana]	-	-	-	-
UNIGENE0000074	ID_42	3	Ty3/gypsy retrotransposon protein [Beta vulgaris subsp. vulgaris]	-	-	-	-
UNIGENE0000075	ID_43	7	PREDICTED: uncharacterized protein LOC103495051 [Cucumis melo]	-	-	-	-
UNIGENE0000076	ID_44	12	--	-	-	-	-
UNIGENE0000080	ID_45	12	--	-	-	-	-
UNIGENE0000082	ID_46	7	PREDICTED: small subunit processome component 20 homolog [Cucumis sativus]	-	-	-	-
UNIGENE0000084	ID_47	7	PREDICTED: probable LRR receptor-like serine/threonine-protein kinase At1g53440 [Cucumis melo]	-	-	GO:0003824//catalytic activity;GO:0016740//transferase activity;GO:0032550//purine ribonucleoside binding;GO:1901363//heterocyclic compound binding;GO:0016301//kinase activity;GO:0005488//binding;GO:0036094//small molecule binding;GO:0016773//phosphotransferase activity, alcohol group as acceptor;GO:0032549//ribonucleoside binding;GO:0001883//purine nucleoside binding;GO:0001882//nucleoside bindi…	GO:0044267//cellular protein metabolic process;GO:0044260//cellular macromolecule metabolic process;GO:0019538//protein metabolic process;GO:0043170//macromolecule metabolic process;GO:0006796//phosphate-containing compound metabolic process;GO:0006464//cellular protein modification process;GO:0009987//cellular process;GO:0043412//macromolecule modification;GO:0044238//primary metabolic process;G…
UNIGENE0000085	ID_48	10	--	-	-	-	-
UNIGENE0000087	ID_49	12	--	-	-	-	-
UNIGENE0000089	ID_50	12	--	-	-	-	-
UNIGENE0000090	ID_51	18	PREDICTED: serine/threonine-protein kinase SMG1-like [Cucumis melo]	ko03015//mRNA surveillance pathway//Translation//Genetic Information Processing	-	GO:0097159//organic cyclic compound binding;GO:0036094//small molecule binding;GO:0005488//binding;GO:0003824//catalytic activity;GO:0004673//protein histidine kinase activity;GO:0001882//nucleoside binding;GO:0016301//kinase activity;GO:0004672//protein kinase activity;GO:0016775//phosphotransferase activity, nitrogenous group as acceptor;GO:0016773//phosphotransferase activity, alcohol group as…	GO:0044763//single-organism cellular process;GO:0044699//single-organism process;GO:0051716//cellular response to stimulus;GO:0035556//intracellular signal transduction;GO:0006796//phosphate-containing compound metabolic process;GO:0006793//phosphorus metabolic process;GO:0044237//cellular metabolic process;GO:0065007//biological regulation;GO:0050794//regulation of cellular process;GO:0044700//s…
UNIGENE0000092	ID_52	6	--	-	-	-	-
UNIGENE0000094	ID_53	7	PREDICTED: patellin-3-like [Cucumis melo]	-	GO:0016020//membrane;GO:0031224//intrinsic component of membrane;GO:0005623//cell;GO:0044464//cell part;GO:0044425//membrane part	GO:0042578//phosphoric ester hydrolase activity;GO:0016788//hydrolase activity, acting on ester bonds;GO:0003824//catalytic activity;GO:0016787//hydrolase activity	GO:0051234//establishment of localization;GO:0044237//cellular metabolic process;GO:0008152//metabolic process;GO:0051179//localization;GO:0006796//phosphate-containing compound metabolic process;GO:0006793//phosphorus metabolic process;GO:0009987//cellular process
UNIGENE0000098	ID_54	21	cytochrome c oxidase subunit I, partial (mitochondrion) [Lingulodinium polyedrum]	ko00190//Oxidative phosphorylation//Energy metabolism//Metabolism	GO:0044464//cell part;GO:0043229//intracellular organelle;GO:0031967//organelle envelope;GO:0044424//intracellular part;GO:0019866//organelle inner membrane;GO:0031975//envelope;GO:0044422//organelle part;GO:0044446//intracellular organelle part;GO:0043231//intracellular membrane-bounded organelle;GO:0016020//membrane;GO:0005622//intracellular;GO:0044425//membrane part;GO:0031090//organelle membr…	GO:0005488//binding;GO:0043167//ion binding;GO:0003824//catalytic activity;GO:0097159//organic cyclic compound binding;GO:0046872//metal ion binding;GO:1901363//heterocyclic compound binding;GO:0046914//transition metal ion binding;GO:0046906//tetrapyrrole binding;GO:0009055//electron carrier activity;GO:0043169//cation binding	GO:0044763//single-organism cellular process;GO:0044710//single-organism metabolic process;GO:0015992//proton transport;GO:0015672//monovalent inorganic cation transport;GO:0008152//metabolic process;GO:0006812//cation transport;GO:0051179//localization;GO:0006091//generation of precursor metabolites and energy;GO:0044237//cellular metabolic process;GO:0045333//cellular respiration;GO:0015980//en…
UNIGENE0000099	ID_55	21	cytochrome c oxidase subunit I, partial (mitochondrion) [Lingulodinium polyedrum]	ko00190//Oxidative phosphorylation//Energy metabolism//Metabolism	GO:0016020//membrane;GO:0044424//intracellular part;GO:0031224//intrinsic component of membrane;GO:0044464//cell part;GO:0043231//intracellular membrane-bounded organelle;GO:0031090//organelle membrane;GO:0044425//membrane part;GO:0005622//intracellular;GO:0005623//cell;GO:0043229//intracellular organelle;GO:0031967//organelle envelope;GO:0043227//membrane-bounded organelle;GO:0043226//organelle;…	GO:0043169//cation binding;GO:0009055//electron carrier activity;GO:0046906//tetrapyrrole binding;GO:0003824//catalytic activity;GO:0043167//ion binding;GO:0097159//organic cyclic compound binding;GO:0005488//binding;GO:0046914//transition metal ion binding;GO:1901363//heterocyclic compound binding;GO:0046872//metal ion binding	GO:0044699//single-organism process;GO:0006818//hydrogen transport;GO:0044765//single-organism transport;GO:0051234//establishment of localization;GO:0006811//ion transport;GO:0015980//energy derivation by oxidation of organic compounds;GO:0015992//proton transport;GO:0009987//cellular process;GO:0015672//monovalent inorganic cation transport;GO:0006091//generation of precursor metabolites and en…
UNIGENE0000101	ID_56	9	PREDICTED: abscisic acid 8'-hydroxylase 2 [Cucumis melo]	-	-	GO:0046914//transition metal ion binding;GO:1901363//heterocyclic compound binding;GO:0043169//cation binding;GO:0043167//ion binding;GO:0016491//oxidoreductase activity;GO:0046872//metal ion binding;GO:0046906//tetrapyrrole binding;GO:0097159//organic cyclic compound binding;GO:0005488//binding;GO:0003824//catalytic activity	GO:0044699//single-organism process;GO:0008152//metabolic process;GO:0044710//single-organism metabolic process
UNIGENE0000102	ID_57	17	PREDICTED: RING finger and CHY zinc finger domain-containing protein 1-like [Cucumis melo]	ko04120//Ubiquitin mediated proteolysis//Folding, sorting and degradation//Genetic Information Processing	-	-	-
UNIGENE0000103	ID_58	12	--	-	-	-	-
UNIGENE0000104	ID_59	16	PREDICTED: WD-40 repeat-containing protein MSI2-like [Cucumis sativus]	-	GO:0044424//intracellular part;GO:0043226//organelle;GO:0043227//membrane-bounded organelle;GO:0005622//intracellular;GO:0044464//cell part;GO:0043229//intracellular organelle;GO:0043231//intracellular membrane-bounded organelle;GO:0005623//cell	GO:0016407//acetyltransferase activity;GO:0016740//transferase activity;GO:0008080//N-acetyltransferase activity;GO:0016747//transferase activity, transferring acyl groups other than amino-acyl groups;GO:0016746//transferase activity, transferring acyl groups;GO:0090595//acetyl-CoA:L-lysine N6-acetyltransferase;GO:0016410//N-acyltransferase activity;GO:0003824//catalytic activity	GO:0044260//cellular macromolecule metabolic process;GO:0071840//cellular component organization or biogenesis;GO:0016569//covalent chromatin modification;GO:0043412//macromolecule modification;GO:0016570//histone modification;GO:0036211//protein modification process;GO:0071704//organic substance metabolic process;GO:1902589//single-organism organelle organization;GO:0044267//cellular protein met…
UNIGENE0000108	ID_60	12	--	-	-	-	-
UNIGENE0000109	ID_61	14	PREDICTED: phosphatidylinositol 4-phosphate 5-kinase 5-like [Cucumis sativus]	ko04144//Endocytosis//Transport and catabolism//Cellular Processes;ko00562//Inositol phosphate metabolism//Carbohydrate metabolism//Metabolism;ko04070//Phosphatidylinositol signaling system//Signal transduction//Environmental Information Processing	GO:0005623//cell;GO:0044464//cell part	GO:0005488//binding;GO:0016301//kinase activity;GO:0001883//purine nucleoside binding;GO:0016307//phosphatidylinositol phosphate kinase activity;GO:0016773//phosphotransferase activity, alcohol group as acceptor;GO:0097367//carbohydrate derivative binding;GO:0036094//small molecule binding;GO:0016772//transferase activity, transferring phosphorus-containing groups;GO:0001882//nucleoside binding;G…	GO:0008152//metabolic process;GO:0016043//cellular component organization;GO:0044710//single-organism metabolic process;GO:0071704//organic substance metabolic process;GO:0044238//primary metabolic process;GO:0006650//glycerophospholipid metabolic process;GO:0046486//glycerolipid metabolic process;GO:0044699//single-organism process;GO:0032501//multicellular organismal process;GO:0009987//cellula…
UNIGENE0000113	ID_62	6	PREDICTED: U11/U12 small nuclear ribonucleoprotein 25 kDa protein-like isoform X2 [Cucumis melo]	-	-	-	-
UNIGENE0000115	ID_63	11	--	-	-	-	-
UNIGENE0000116	ID_64	3	LINE-1 reverse transcriptase like [Glycine soja]	-	-	-	-
UNIGENE0000118	ID_65	3	--	-	-	-	-
UNIGENE0000119	ID_66	20	Chaperone protein dnaJ-related [Theobroma cacao]	-	-	GO:0005488//binding;GO:0005515//protein binding	-
UNIGENE0000120	ID_67	10	BnaC08g23690D [Brassica napus]	-	-	-	-
UNIGENE0000121	ID_68	12	OSJNBa0061G20.2 [Oryza sativa Japonica Group]	-	GO:0043227//membrane-bounded organelle;GO:0005622//intracellular;GO:0043229//intracellular organelle;GO:0043231//intracellular membrane-bounded organelle;GO:0044424//intracellular part;GO:0043226//organelle;GO:0044464//cell part;GO:0005623//cell	GO:0043169//cation binding;GO:0046914//transition metal ion binding;GO:0005488//binding;GO:0043167//ion binding;GO:0046872//metal ion binding;GO:0097159//organic cyclic compound binding	GO:0044237//cellular metabolic process;GO:0009987//cellular process;GO:0034641//cellular nitrogen compound metabolic process;GO:0090304//nucleic acid metabolic process;GO:0008152//metabolic process;GO:0046483//heterocycle metabolic process;GO:0006807//nitrogen compound metabolic process;GO:0006259//DNA metabolic process;GO:0043170//macromolecule metabolic process;GO:0044238//primary metabolic pro…
UNIGENE0000123	ID_69	12	PREDICTED: classical arabinogalactan protein 26 [Cucumis sativus]	-	-	-	-
UNIGENE0000124	ID_70	14	CTV.20 [Citrus trifoliata]	-	-	GO:0043169//cation binding;GO:0046872//metal ion binding;GO:0003824//catalytic activity;GO:0043167//ion binding;GO:0005488//binding	GO:0044238//primary metabolic process;GO:0043170//macromolecule metabolic process;GO:0071704//organic substance metabolic process;GO:0008152//metabolic process
UNIGENE0000126	ID_71	12	--	-	-	-	-
UNIGENE0000127	ID_72	21	cytochrome c oxidase subunit 3 (mitochondrion) (mitochondrion) [Chlorella sp. ArM0029B]	ko00190//Oxidative phosphorylation//Energy metabolism//Metabolism	GO:0043229//intracellular organelle;GO:0043226//organelle;GO:0005623//cell;GO:0044464//cell part;GO:0043227//membrane-bounded organelle;GO:0044424//intracellular part;GO:0043231//intracellular membrane-bounded organelle;GO:0005622//intracellular;GO:0016020//membrane	GO:0003824//catalytic activity;GO:0016491//oxidoreductase activity	GO:0022900//electron transport chain;GO:0044237//cellular metabolic process;GO:0055114//oxidation-reduction process;GO:0009987//cellular process;GO:0045333//cellular respiration;GO:0044710//single-organism metabolic process;GO:0022904//respiratory electron transport chain;GO:0008152//metabolic process;GO:0015980//energy derivation by oxidation of organic compounds;GO:0006091//generation of precur…
UNIGENE0000128	ID_73	10	paraquat downregulated protein [Arabidopsis thaliana]	-	-	-	-
UNIGENE0000129	ID_74	15	PREDICTED: ethylene-responsive transcription factor RAP2-3 isoform X1 [Cucumis melo]	-	-	-	GO:0050789//regulation of biological process;GO:0019222//regulation of metabolic process;GO:0065007//biological regulation;GO:0060255//regulation of macromolecule metabolic process;GO:0009987//cellular process;GO:0010468//regulation of gene expression
UNIGENE0000130	ID_75	6	--	-	-	-	-
UNIGENE0000134	ID_76	12	--	-	-	-	-
UNIGENE0000135	ID_77	7	--	-	-	-	-
UNIGENE0000141	ID_78	3	PREDICTED: probable serine/threonine-protein kinase At1g01540 [Cucumis sativus]	-	-	GO:0036094//small molecule binding;GO:0003824//catalytic activity;GO:0097159//organic cyclic compound binding;GO:1901363//heterocyclic compound binding;GO:0097367//carbohydrate derivative binding;GO:0004871//signal transducer activity;GO:0001883//purine nucleoside binding;GO:0016772//transferase activity, transferring phosphorus-containing groups;GO:0005057//receptor signaling protein activity;GO…	GO:0001934//positive regulation of protein phosphorylation;GO:0051246//regulation of protein metabolic process;GO:0032147//activation of protein kinase activity;GO:0010604//positive regulation of macromolecule metabolic process;GO:0065007//biological regulation;GO:0051174//regulation of phosphorus metabolic process;GO:0050789//regulation of biological process;GO:0051716//cellular response to stim…
UNIGENE0000142	ID_79	20	--	-	-	-	-
UNIGENE0000145	ID_80	20	BnaC03g00880D [Brassica napus]	-	-	-	-
UNIGENE0000146	ID_81	7	PREDICTED: probable GPI-anchored adhesin-like protein PGA55 isoform X1 [Cucumis melo]	-	-	-	-
UNIGENE0000153	ID_82	12	PREDICTED: probable glutathione peroxidase 8 [Cucumis melo]	ko00480//Glutathione metabolism//Metabolism of other amino acids//Metabolism;ko00590//Arachidonic acid metabolism//Lipid metabolism//Metabolism	GO:0005737//cytoplasm;GO:0044444//cytoplasmic part;GO:0005622//intracellular;GO:0043227//membrane-bounded organelle;GO:0005623//cell;GO:0044464//cell part;GO:0043226//organelle;GO:0043229//intracellular organelle;GO:0044424//intracellular part;GO:0043231//intracellular membrane-bounded organelle	GO:0005488//binding;GO:0016209//antioxidant activity;GO:0004601//peroxidase activity;GO:0016491//oxidoreductase activity;GO:0003824//catalytic activity;GO:0043169//cation binding;GO:0043167//ion binding;GO:0016684//oxidoreductase activity, acting on peroxide as acceptor	GO:0006950//response to stress;GO:0044763//single-organism cellular process;GO:0019748//secondary metabolic process;GO:0009987//cellular process;GO:0050896//response to stimulus;GO:0008152//metabolic process;GO:0044237//cellular metabolic process;GO:0044699//single-organism process;GO:0044710//single-organism metabolic process;GO:0009404//toxin metabolic process
UNIGENE0000154	ID_83	21	PREDICTED: UDP-glycosyltransferase 91A1-like [Camelina sativa]	-	-	GO:0016740//transferase activity;GO:0003824//catalytic activity;GO:0016757//transferase activity, transferring glycosyl groups	-
UNIGENE0000155	ID_84	7	Nucleotide-diphospho-sugar transferase family protein [Theobroma cacao]	-	-	GO:0003824//catalytic activity	-
UNIGENE0000156	ID_85	4	--	-	-	-	-
UNIGENE0000157	ID_86	4	PREDICTED: probable E3 ubiquitin-protein ligase LOG2 [Cucumis sativus]	-	-	GO:0046914//transition metal ion binding;GO:0046872//metal ion binding;GO:0005488//binding;GO:0043169//cation binding;GO:0043167//ion binding	-
UNIGENE0000160	ID_87	8	PREDICTED: pentatricopeptide repeat-containing protein At5g04780 [Cucumis melo]	-	-	GO:0016462//pyrophosphatase activity;GO:0016887//ATPase activity;GO:0042623//ATPase activity, coupled;GO:0016787//hydrolase activity;GO:0016818//hydrolase activity, acting on acid anhydrides, in phosphorus-containing anhydrides;GO:0003824//catalytic activity;GO:0016817//hydrolase activity, acting on acid anhydrides;GO:0017111//nucleoside-triphosphatase activity	-
UNIGENE0000161	ID_88	15	hypothetical protein Csa_4G022250 [Cucumis sativus]	-	-	-	-
UNIGENE0000166	ID_89	12	--	-	-	-	-
UNIGENE0000168	ID_90	14	PREDICTED: G-type lectin S-receptor-like serine/threonine-protein kinase RLK1-like [Citrus sinensis]	-	-	GO:0016740//transferase activity;GO:0016773//phosphotransferase activity, alcohol group as acceptor;GO:1901363//heterocyclic compound binding;GO:0016301//kinase activity;GO:0005488//binding;GO:0004672//protein kinase activity;GO:0003824//catalytic activity;GO:0036094//small molecule binding;GO:0097159//organic cyclic compound binding;GO:0016772//transferase activity, transferring phosphorus-conta…	GO:0006464//cellular protein modification process;GO:0009987//cellular process;GO:0043412//macromolecule modification;GO:0043170//macromolecule metabolic process;GO:0044267//cellular protein metabolic process;GO:0019538//protein metabolic process;GO:0044237//cellular metabolic process;GO:0006796//phosphate-containing compound metabolic process;GO:0008152//metabolic process;GO:0006793//phosphorus …
UNIGENE0000170	ID_91	3	--	-	-	-	-
UNIGENE0000171	ID_92	7	hypothetical protein Csa_6G497320 [Cucumis sativus]	-	-	-	-
UNIGENE0000172	ID_93	12	--	-	-	-	-
UNIGENE0000173	ID_94	21	PREDICTED: pentatricopeptide repeat-containing protein At3g48810 [Cucumis melo]	-	-	-	-
UNIGENE0000174	ID_95	6	--	-	-	-	-
UNIGENE0000175	ID_96	6	--	-	-	-	-
UNIGENE0000176	ID_97	21	PREDICTED: beta-galactosidase 5 [Cucumis sativus]	-	GO:0005576//extracellular region	GO:0005488//binding;GO:0004553//hydrolase activity, hydrolyzing O-glycosyl compounds;GO:0016787//hydrolase activity;GO:0003824//catalytic activity;GO:0016798//hydrolase activity, acting on glycosyl bonds;GO:0015925//galactosidase activity	GO:0050793//regulation of developmental process;GO:0006576//cellular biogenic amine metabolic process;GO:0042546//cell wall biogenesis;GO:0071704//organic substance metabolic process;GO:0071555//cell wall organization;GO:0044085//cellular component biogenesis;GO:0065007//biological regulation;GO:0009308//amine metabolic process;GO:2000026//regulation of multicellular organismal development;GO:190…
UNIGENE0000177	ID_98	23	PREDICTED: beta-galactosidase 5-like [Cucumis melo]	-	GO:0005576//extracellular region	GO:0003824//catalytic activity;GO:0004553//hydrolase activity, hydrolyzing O-glycosyl compounds;GO:0016787//hydrolase activity;GO:0016798//hydrolase activity, acting on glycosyl bonds;GO:0015925//galactosidase activity;GO:0005488//binding	GO:0008152//metabolic process;GO:0006807//nitrogen compound metabolic process;GO:2000026//regulation of multicellular organismal development;GO:0006576//cellular biogenic amine metabolic process;GO:0016043//cellular component organization;GO:0009987//cellular process;GO:0044085//cellular component biogenesis;GO:1901564//organonitrogen compound metabolic process;GO:0006595//polyamine metabolic pro…
UNIGENE0000178	ID_99	15	Mitochondrial import inner membrane translocase subunit tim-10 isoform 1 [Theobroma cacao]	-	-	-	GO:0048869//cellular developmental process;GO:0051252//regulation of RNA metabolic process;GO:1903506//regulation of nucleic acid-templated transcription;GO:0009653//anatomical structure morphogenesis;GO:0044707//single-multicellular organism process;GO:0019219//regulation of nucleobase-containing compound metabolic process;GO:0044699//single-organism process;GO:0048513//organ development;GO:0007…
UNIGENE0000180	ID_100	18	PREDICTED: LOW QUALITY PROTEIN: protein SUPPRESSOR OF npr1-1, CONSTITUTIVE 1-like [Cucumis sativus]	-	-	GO:0001882//nucleoside binding;GO:0032549//ribonucleoside binding;GO:0036094//small molecule binding;GO:0097159//organic cyclic compound binding;GO:0005488//binding;GO:0097367//carbohydrate derivative binding;GO:1901363//heterocyclic compound binding;GO:0032550//purine ribonucleoside binding;GO:0001883//purine nucleoside binding	GO:0050794//regulation of cellular process;GO:0050789//regulation of biological process;GO:0065007//biological regulation
UNIGENE0000187	ID_101	12	PREDICTED: tRNA (guanine(10)-N2)-methyltransferase homolog [Cucumis melo]	-	-	GO:0003824//catalytic activity;GO:0097159//organic cyclic compound binding;GO:0016740//transferase activity;GO:0016741//transferase activity, transferring one-carbon groups;GO:0005488//binding	GO:0006399//tRNA metabolic process;GO:1902578//single-organism localization;GO:0071702//organic substance transport;GO:0008033//tRNA processing;GO:0042278//purine nucleoside metabolic process;GO:1901360//organic cyclic compound metabolic process;GO:0044237//cellular metabolic process;GO:0051641//cellular localization;GO:0006725//cellular aromatic compound metabolic process;GO:0044281//small molec…
UNIGENE0000188	ID_102	15	--	-	-	-	-
UNIGENE0000189	ID_103	12	PREDICTED: B-cell receptor-associated protein 31-like [Cucumis melo]	ko04141//Protein processing in endoplasmic reticulum//Folding, sorting and degradation//Genetic Information Processing	GO:0005623//cell;GO:0043227//membrane-bounded organelle;GO:0043231//intracellular membrane-bounded organelle;GO:0043226//organelle;GO:0044425//membrane part;GO:0044464//cell part;GO:0043229//intracellular organelle;GO:0031224//intrinsic component of membrane;GO:0044424//intracellular part;GO:0005622//intracellular;GO:0016020//membrane	-	GO:0008104//protein localization;GO:0033036//macromolecule localization;GO:0015031//protein transport;GO:0071702//organic substance transport;GO:0045184//establishment of protein localization;GO:0051179//localization;GO:0006810//transport;GO:0051234//establishment of localization
UNIGENE0000190	ID_104	21	PREDICTED: protein MCM10 homolog isoform X3 [Cucumis melo]	-	GO:0043226//organelle;GO:0043229//intracellular organelle;GO:0044464//cell part;GO:0043231//intracellular membrane-bounded organelle;GO:0044424//intracellular part;GO:0005622//intracellular;GO:0005623//cell;GO:0043227//membrane-bounded organelle	-	GO:0006807//nitrogen compound metabolic process;GO:0090304//nucleic acid metabolic process;GO:0006139//nucleobase-containing compound metabolic process;GO:1901360//organic cyclic compound metabolic process;GO:0044238//primary metabolic process;GO:0044260//cellular macromolecule metabolic process;GO:0006259//DNA metabolic process;GO:0008152//metabolic process;GO:0044237//cellular metabolic process…
UNIGENE0000191	ID_105	10	--	-	-	-	-
UNIGENE0000194	ID_106	21	PREDICTED: pentatricopeptide repeat-containing protein At1g18485 [Cucumis melo]	-	-	-	-
UNIGENE0000198	ID_107	5	PREDICTED: EPIDERMAL PATTERNING FACTOR-like protein 4 [Cucumis melo]	-	-	-	-
UNIGENE0000199	ID_108	16	PREDICTED: sulfated surface glycoprotein 185-like [Pyrus x bretschneideri]	-	-	GO:0016757//transferase activity, transferring glycosyl groups;GO:0016763//transferase activity, transferring pentosyl groups;GO:0003824//catalytic activity;GO:0016740//transferase activity	-
UNIGENE0000200	ID_109	14	--	-	-	-	-
UNIGENE0000201	ID_110	15	Protein kinase domain containing protein, expressed [Oryza sativa Japonica Group]	-	GO:0005623//cell;GO:0044424//intracellular part;GO:0005622//intracellular;GO:0044464//cell part	-	-
UNIGENE0000204	ID_111	12	--	-	-	-	-
UNIGENE0000206	ID_112	15	--	-	-	-	-
UNIGENE0000208	ID_113	9	--	-	-	-	-
UNIGENE0000211	ID_114	6	--	-	-	-	-
UNIGENE0000214	ID_115	6	--	-	-	-	-
UNIGENE0000215	ID_116	12	--	-	-	-	-
UNIGENE0000218	ID_117	21	T3P18.3 [Arabidopsis thaliana]	-	-	GO:0005488//binding	GO:0071704//organic substance metabolic process;GO:0044238//primary metabolic process;GO:0008152//metabolic process;GO:0043170//macromolecule metabolic process
UNIGENE0000222	ID_118	23	Octicosapeptide/Phox/Bem1p family protein [Theobroma cacao]	-	-	-	-
UNIGENE0000223	ID_119	3	--	-	-	-	-
UNIGENE0000224	ID_120	7	PREDICTED: LOW QUALITY PROTEIN: pentatricopeptide repeat-containing protein At4g31850, chloroplastic [Cucumis sativus]	-	-	-	GO:0008152//metabolic process;GO:0009987//cellular process;GO:0044238//primary metabolic process;GO:0044710//single-organism metabolic process;GO:0044699//single-organism process;GO:0044763//single-organism cellular process;GO:0044237//cellular metabolic process;GO:0043170//macromolecule metabolic process;GO:0071704//organic substance metabolic process
UNIGENE0000225	ID_121	4	PREDICTED: pentatricopeptide repeat-containing protein At4g31850, chloroplastic [Cucumis melo]	-	-	-	GO:0044763//single-organism cellular process;GO:0009987//cellular process;GO:0043170//macromolecule metabolic process;GO:0044238//primary metabolic process;GO:0044237//cellular metabolic process;GO:0008152//metabolic process;GO:0044699//single-organism process;GO:0071704//organic substance metabolic process;GO:0044710//single-organism metabolic process
UNIGENE0000228	ID_122	12	PREDICTED: random slug protein 5 [Cucumis melo]	-	GO:0044464//cell part;GO:0005623//cell	-	GO:0009987//cellular process;GO:0019438//aromatic compound biosynthetic process;GO:0071704//organic substance metabolic process;GO:0044550//secondary metabolite biosynthetic process;GO:1901360//organic cyclic compound metabolic process;GO:0044699//single-organism process;GO:0044249//cellular biosynthetic process;GO:0008152//metabolic process;GO:0044763//single-organism cellular process;GO:0019748…
UNIGENE0000230	ID_123	17	PREDICTED: protein FAR1-RELATED SEQUENCE 3-like [Cucumis melo]	-	-	-	-
UNIGENE0000231	ID_124	12	--	-	-	-	-
UNIGENE0000232	ID_125	1	--	-	-	-	-
UNIGENE0000234	ID_126	6	hypothetical protein PRUPE_ppb020328mg [Prunus persica]	-	-	-	-
UNIGENE0000236	ID_127	9	Os05g0296200, partial [Oryza sativa Japonica Group]	-	GO:0044464//cell part;GO:0043226//organelle;GO:0044424//intracellular part;GO:0005623//cell;GO:0005622//intracellular;GO:0043227//membrane-bounded organelle;GO:0043231//intracellular membrane-bounded organelle;GO:0043229//intracellular organelle	-	-
UNIGENE0000238	ID_128	12	--	-	-	-	-
UNIGENE0000239	ID_129	4	--	-	-	-	-
UNIGENE0000242	ID_130	12	PREDICTED: uncharacterized protein LOC105420238 [Amborella trichopoda]	-	-	-	-
UNIGENE0000244	ID_131	18	Beta-1,3-glucosyltransferase [Gossypium arboreum]	-	-	GO:0003824//catalytic activity;GO:0016740//transferase activity	-
UNIGENE0000245	ID_132	18	transferring glycosyl group transferase [Medicago truncatula]	-	-	-	-
UNIGENE0000246	ID_133	14	PREDICTED: sugar transport protein 13-like [Cucumis sativus]	-	GO:0044425//membrane part;GO:0031224//intrinsic component of membrane;GO:0005911//cell-cell junction;GO:0030054//cell junction;GO:0016020//membrane	GO:0022804//active transmembrane transporter activity;GO:0016628//oxidoreductase activity, acting on the CH-CH group of donors, NAD or NADP as acceptor;GO:0005351//sugar:proton symporter activity;GO:0022891//substrate-specific transmembrane transporter activity;GO:0015291//secondary active transmembrane transporter activity;GO:0005402//cation:sugar symporter activity;GO:0015295//solute:proton sym…	GO:0071705//nitrogen compound transport;GO:0006810//transport;GO:0051234//establishment of localization;GO:0008645//hexose transport;GO:0046942//carboxylic acid transport;GO:0008643//carbohydrate transport;GO:1902578//single-organism localization;GO:0015749//monosaccharide transport;GO:0044763//single-organism cellular process;GO:0006811//ion transport;GO:0009987//cellular process;GO:0044765//sin…
UNIGENE0000247	ID_134	7	--	-	-	-	-
UNIGENE0000249	ID_135	20	PREDICTED: 36.4 kDa proline-rich protein [Cucumis melo]	-	-	-	-
UNIGENE0000250	ID_136	15	PREDICTED: zinc finger BED domain-containing protein DAYSLEEPER-like [Cucumis sativus]	-	-	GO:0097159//organic cyclic compound binding;GO:0005515//protein binding;GO:0003676//nucleic acid binding;GO:0005488//binding;GO:1901363//heterocyclic compound binding	-
UNIGENE0000251	ID_137	14	PREDICTED: zinc finger BED domain-containing protein DAYSLEEPER-like [Cucumis sativus]	-	-	GO:0097159//organic cyclic compound binding;GO:0003676//nucleic acid binding;GO:1901363//heterocyclic compound binding;GO:0005515//protein binding;GO:0005488//binding	-
UNIGENE0000252	ID_138	7	--	-	-	-	-
UNIGENE0000253	ID_139	12	--	-	-	-	-
UNIGENE0000254	ID_140	2	--	-	-	-	-
UNIGENE0000255	ID_141	15	PREDICTED: LOW QUALITY PROTEIN: protein NRT1/ PTR FAMILY 5.2-like [Cucumis melo]	-	-	-	GO:0051179//localization;GO:0051234//establishment of localization
UNIGENE0000256	ID_142	20	--	-	-	-	-
UNIGENE0000258	ID_143	6	--	-	-	-	-
UNIGENE0000263	ID_144	9	--	-	-	-	-
UNIGENE0000264	ID_145	8	PREDICTED: cleavage stimulating factor 64 [Cucumis sativus]	ko03015//mRNA surveillance pathway//Translation//Genetic Information Processing	-	GO:0097159//organic cyclic compound binding;GO:0005488//binding;GO:0036094//small molecule binding	-
UNIGENE0000267	ID_146	12	--	-	-	-	-
UNIGENE0000268	ID_147	12	--	-	-	-	-
UNIGENE0000271	ID_148	12	--	-	-	-	-
UNIGENE0000274	ID_149	12	zinc finger-homeodomain protein 1, partial [Cucumis sativus]	-	-	GO:0005488//binding;GO:1901363//heterocyclic compound binding;GO:0097159//organic cyclic compound binding;GO:0003676//nucleic acid binding	-
UNIGENE0000275	ID_150	6	--	-	-	-	-
UNIGENE0000276	ID_151	0	PREDICTED: histone H3.v1 [Pyrus x bretschneideri]	-	-	-	-
UNIGENE0000277	ID_152	12	--	-	-	-	-
UNIGENE0000281	ID_153	6	--	-	-	-	-
UNIGENE0000282	ID_154	3	--	-	-	-	-
UNIGENE0000283	ID_155	7	--	-	-	-	-
UNIGENE0000287	ID_156	5	PREDICTED: dirigent protein 6 [Cucumis sativus]	-	-	GO:0043169//cation binding;GO:0043167//ion binding;GO:0005488//binding;GO:0046872//metal ion binding	-
UNIGENE0000291	ID_157	12	--	-	-	-	-
UNIGENE0000293	ID_158	17	PREDICTED: heat shock 70 kDa protein [Cucumis melo]	ko04141//Protein processing in endoplasmic reticulum//Folding, sorting and degradation//Genetic Information Processing;ko04144//Endocytosis//Transport and catabolism//Cellular Processes;ko03040//Spliceosome//Transcription//Genetic Information Processing	-	GO:1901363//heterocyclic compound binding;GO:0097159//organic cyclic compound binding;GO:0036094//small molecule binding;GO:0001882//nucleoside binding;GO:0032550//purine ribonucleoside binding;GO:0097367//carbohydrate derivative binding;GO:0001883//purine nucleoside binding;GO:0032549//ribonucleoside binding;GO:0005488//binding	-
UNIGENE0000295	ID_159	21	--	-	-	-	-
UNIGENE0000297	ID_160	5	--	-	-	-	-
UNIGENE0000304	ID_161	12	PREDICTED: pentatricopeptide repeat-containing protein At2g35130 [Cucumis sativus]	-	-	-	-
UNIGENE0000305	ID_162	7	PREDICTED: pentatricopeptide repeat-containing protein At2g35130 isoform X2 [Cucumis melo]	-	-	-	-
UNIGENE0000306	ID_163	7	--	-	-	-	-
UNIGENE0000307	ID_164	23	PREDICTED: copper transport protein ATX1-like [Cucumis sativus]	-	-	GO:0043167//ion binding;GO:0043169//cation binding;GO:0005488//binding	GO:1902578//single-organism localization;GO:0044765//single-organism transport;GO:0006812//cation transport;GO:0051179//localization;GO:0006811//ion transport;GO:0044699//single-organism process;GO:0006810//transport;GO:0051234//establishment of localization
UNIGENE0000308	ID_165	4	--	-	-	-	-
UNIGENE0000309	ID_166	12	PREDICTED: probable pectinesterase 67 [Cucumis sativus]	-	-	GO:0003824//catalytic activity;GO:0016788//hydrolase activity, acting on ester bonds;GO:0016787//hydrolase activity	GO:0009987//cellular process
UNIGENE0000311	ID_167	11	--	-	-	-	-
UNIGENE0000315	ID_168	12	--	-	-	-	-
UNIGENE0000317	ID_169	14	--	-	-	-	-
UNIGENE0000318	ID_170	16	PREDICTED: transcription factor FAMA [Cucumis melo]	-	-	GO:0005515//protein binding;GO:0003824//catalytic activity;GO:0043177//organic acid binding;GO:0031406//carboxylic acid binding;GO:0043168//anion binding;GO:0016491//oxidoreductase activity;GO:0036094//small molecule binding;GO:0005488//binding;GO:0043167//ion binding	GO:0044700//single organism signaling;GO:0070887//cellular response to chemical stimulus;GO:0050794//regulation of cellular process;GO:0048856//anatomical structure development;GO:0044707//single-multicellular organism process;GO:0030154//cell differentiation;GO:0007275//multicellular organismal development;GO:0044710//single-organism metabolic process;GO:0065007//biological regulation;GO:0032502…
UNIGENE0000320	ID_171	12	--	-	-	-	-
UNIGENE0000321	ID_172	0	PREDICTED: spartin-like [Fragaria vesca subsp. vesca]	-	-	-	-
UNIGENE0000322	ID_173	6	--	-	-	-	-
UNIGENE0000323	ID_174	9	--	-	-	-	-
UNIGENE0000326	ID_175	12	PREDICTED: zinc-finger homeodomain protein 6-like [Cucumis sativus]	-	-	-	-
UNIGENE0000327	ID_176	12	--	-	-	-	-
UNIGENE0000330	ID_177	8	--	-	-	-	-
UNIGENE0000331	ID_178	21	PREDICTED: probable LRR receptor-like serine/threonine-protein kinase At1g51860 [Cucumis melo]	-	-	GO:0016740//transferase activity;GO:0001883//purine nucleoside binding;GO:0032549//ribonucleoside binding;GO:0097367//carbohydrate derivative binding;GO:1901363//heterocyclic compound binding;GO:0097159//organic cyclic compound binding;GO:0016301//kinase activity;GO:0016772//transferase activity, transferring phosphorus-containing groups;GO:0005488//binding;GO:0032550//purine ribonucleoside bindi…	GO:0044260//cellular macromolecule metabolic process;GO:0036211//protein modification process;GO:0008152//metabolic process;GO:0044267//cellular protein metabolic process;GO:0044237//cellular metabolic process;GO:0006464//cellular protein modification process;GO:0009987//cellular process;GO:0043170//macromolecule metabolic process;GO:0071704//organic substance metabolic process;GO:0044238//primar…
UNIGENE0000333	ID_179	24	PREDICTED: F-box protein SKIP28 [Cucumis sativus]	-	-	-	GO:0032502//developmental process;GO:0044699//single-organism process;GO:0044707//single-multicellular organism process;GO:0032501//multicellular organismal process
UNIGENE0000334	ID_180	12	--	-	-	-	-
UNIGENE0000335	ID_181	12	--	-	-	-	-
UNIGENE0000336	ID_182	3	--	-	-	-	-
UNIGENE0000337	ID_183	12	PREDICTED: transcription factor JUNGBRUNNEN 1 [Cucumis sativus]	-	-	GO:0005488//binding;GO:0003676//nucleic acid binding;GO:0097159//organic cyclic compound binding;GO:1901363//heterocyclic compound binding	GO:1901576//organic substance biosynthetic process;GO:0044249//cellular biosynthetic process;GO:0050789//regulation of biological process;GO:0065007//biological regulation;GO:0043170//macromolecule metabolic process;GO:0009059//macromolecule biosynthetic process;GO:0009058//biosynthetic process;GO:0008152//metabolic process;GO:0019222//regulation of metabolic process;GO:0044260//cellular macromol…
UNIGENE0000338	ID_184	12	PREDICTED: transcription factor JUNGBRUNNEN 1 [Cucumis melo]	-	GO:0043226//organelle;GO:0043227//membrane-bounded organelle;GO:0005622//intracellular;GO:0044464//cell part;GO:0043229//intracellular organelle;GO:0005623//cell;GO:0043231//intracellular membrane-bounded organelle;GO:0044424//intracellular part	GO:0097159//organic cyclic compound binding;GO:1901363//heterocyclic compound binding;GO:0005488//binding;GO:0003676//nucleic acid binding	GO:0009058//biosynthetic process;GO:0050789//regulation of biological process;GO:0008152//metabolic process;GO:0060255//regulation of macromolecule metabolic process;GO:0043170//macromolecule metabolic process;GO:0034645//cellular macromolecule biosynthetic process;GO:0019222//regulation of metabolic process;GO:0009059//macromolecule biosynthetic process;GO:0071704//organic substance metabolic pr…
UNIGENE0000339	ID_185	20	PREDICTED: protein TPX2-like [Cucumis sativus]	-	GO:0043228//non-membrane-bounded organelle;GO:0044424//intracellular part;GO:0043229//intracellular organelle;GO:0043232//intracellular non-membrane-bounded organelle;GO:0044464//cell part;GO:0005623//cell;GO:0015630//microtubule cytoskeleton;GO:0043226//organelle;GO:0005622//intracellular;GO:0005856//cytoskeleton	-	GO:0000280//nuclear division;GO:0016043//cellular component organization;GO:0071840//cellular component organization or biogenesis;GO:0006996//organelle organization;GO:0009987//cellular process;GO:0048285//organelle fission
UNIGENE0000340	ID_186	18	--	-	-	-	-
UNIGENE0000341	ID_187	12	--	-	-	-	-
UNIGENE0000342	ID_188	2	hypothetical protein PRUPE_ppa017805mg, partial [Prunus persica]	-	-	-	-
UNIGENE0000343	ID_189	12	--	-	-	-	-
UNIGENE0000350	ID_190	23	--	-	-	-	-
UNIGENE0000351	ID_191	5	--	-	-	-	-
UNIGENE0000352	ID_192	12	--	-	-	-	-
UNIGENE0000359	ID_193	12	--	-	-	-	-
UNIGENE0000361	ID_194	1	PREDICTED: uncharacterized protein LOC103336956 [Prunus mume]	-	-	-	-
UNIGENE0000362	ID_195	1	--	-	-	-	-
UNIGENE0000365	ID_196	10	--	-	-	-	-
UNIGENE0000366	ID_197	11	--	-	-	-	-
UNIGENE0000369	ID_198	6	--	-	-	-	-
UNIGENE0000370	ID_199	5	PREDICTED: UPF0481 protein At3g47200 [Cucumis sativus]	-	-	-	-
UNIGENE0000372	ID_200	21	PREDICTED: galactose oxidase-like [Cucumis melo]	-	-	GO:0003824//catalytic activity;GO:0016740//transferase activity;GO:0016765//transferase activity, transferring alkyl or aryl (other than methyl) groups	-
UNIGENE0000377	ID_201	4	--	-	-	-	-
UNIGENE0000378	ID_202	12	--	-	-	-	-
UNIGENE0000379	ID_203	5	OSJNBb0016D16.10 [Oryza sativa Japonica Group]	-	-	GO:1901363//heterocyclic compound binding;GO:0003824//catalytic activity;GO:0016772//transferase activity, transferring phosphorus-containing groups;GO:0016740//transferase activity;GO:0005488//binding;GO:0097159//organic cyclic compound binding	-
UNIGENE0000384	ID_204	3	--	-	-	-	-
UNIGENE0000385	ID_205	11	--	-	-	-	-
UNIGENE0000386	ID_206	17	--	-	-	-	-
UNIGENE0000388	ID_207	12	--	-	-	-	-
UNIGENE0000389	ID_208	12	--	-	-	-	-
UNIGENE0000390	ID_209	14	--	-	-	-	-
UNIGENE0000391	ID_210	12	--	-	-	-	-
UNIGENE0000393	ID_211	6	--	-	-	-	-
UNIGENE0000394	ID_212	10	--	-	-	-	-
UNIGENE0000396	ID_213	0	--	-	-	-	-
UNIGENE0000397	ID_214	1	--	-	-	-	-
UNIGENE0000398	ID_215	12	--	-	-	-	-
UNIGENE0000399	ID_216	21	--	-	-	-	-
UNIGENE0000400	ID_217	6	--	-	-	-	-
UNIGENE0000402	ID_218	12	--	-	-	-	-
UNIGENE0000404	ID_219	11	photosystem II CP43 chlorophyll apoprotein, partial [Flagellaria indica]	ko00195//Photosynthesis//Energy metabolism//Metabolism	GO:0044436//thylakoid part;GO:0044424//intracellular part;GO:0043234//protein complex;GO:0043227//membrane-bounded organelle;GO:0005622//intracellular;GO:0009536//plastid;GO:0005623//cell;GO:0016020//membrane;GO:0005737//cytoplasm;GO:0009507//chloroplast;GO:0044435//plastid part;GO:0034357//photosynthetic membrane;GO:0044444//cytoplasmic part;GO:0044464//cell part;GO:0043229//intracellular organe…	GO:0005488//binding;GO:0097159//organic cyclic compound binding;GO:1901363//heterocyclic compound binding;GO:0043169//cation binding;GO:0043167//ion binding;GO:0046906//tetrapyrrole binding;GO:0009055//electron carrier activity	GO:0055114//oxidation-reduction process;GO:0043170//macromolecule metabolic process;GO:0044237//cellular metabolic process;GO:0006464//cellular protein modification process;GO:0008152//metabolic process;GO:0044267//cellular protein metabolic process;GO:0044710//single-organism metabolic process;GO:0044260//cellular macromolecule metabolic process;GO:0044238//primary metabolic process;GO:0044763//…
UNIGENE0000406	ID_220	12	gag/pol protein [Bryonia dioica]	-	-	-	-
UNIGENE0000407	ID_221	4	T-box protein 41 [Theobroma cacao]	-	-	-	-
UNIGENE0000408	ID_222	4	cyst nematode resistance protein-like protein [Oryza sativa Japonica Group]	-	-	-	-
UNIGENE0000411	ID_223	12	PREDICTED: coumaroyl-CoA:anthocyanidin 3-O-glucoside-6''-O-coumaroyltransferase 2-like isoform X1 [Cucumis melo]	-	-	GO:0016740//transferase activity;GO:0003824//catalytic activity;GO:0016746//transferase activity, transferring acyl groups	-
UNIGENE0000413	ID_224	1	PREDICTED: S-adenosylmethionine decarboxylase proenzyme-like [Cucumis sativus]	ko00270//Cysteine and methionine metabolism//Amino acid metabolism//Metabolism;ko00330//Arginine and proline metabolism//Amino acid metabolism//Metabolism	-	GO:0016830//carbon-carbon lyase activity;GO:0003824//catalytic activity;GO:0016829//lyase activity;GO:0016831//carboxy-lyase activity	GO:0044272//sulfur compound biosynthetic process;GO:0006596//polyamine biosynthetic process;GO:0044249//cellular biosynthetic process;GO:0009987//cellular process;GO:0071704//organic substance metabolic process;GO:1901576//organic substance biosynthetic process;GO:1901564//organonitrogen compound metabolic process;GO:0008152//metabolic process;GO:0042401//cellular biogenic amine biosynthetic proc…
UNIGENE0000415	ID_225	12	--	-	-	-	-
UNIGENE0000416	ID_226	12	--	-	-	-	-
UNIGENE0000418	ID_227	6	--	-	-	-	-
UNIGENE0000419	ID_228	3	--	-	-	-	-
UNIGENE0000422	ID_229	12	--	-	-	-	-
UNIGENE0000423	ID_230	3	--	-	-	-	-
UNIGENE0000430	ID_231	7	nucleotide-diphospho-sugar transferase family protein, partial [Medicago truncatula]	-	-	-	-
UNIGENE0000433	ID_232	10	--	-	-	-	-
UNIGENE0000434	ID_233	12	reverse transcriptase [Elaeis guineensis]	-	-	GO:0003824//catalytic activity;GO:0043169//cation binding;GO:0016779//nucleotidyltransferase activity;GO:0008233//peptidase activity;GO:0097159//organic cyclic compound binding;GO:0016740//transferase activity;GO:0046914//transition metal ion binding;GO:0043167//ion binding;GO:0046872//metal ion binding;GO:0070011//peptidase activity, acting on L-amino acid peptides;GO:0005488//binding;GO:0016772…	GO:0044260//cellular macromolecule metabolic process;GO:0046483//heterocycle metabolic process;GO:0044238//primary metabolic process;GO:0071704//organic substance metabolic process;GO:0009059//macromolecule biosynthetic process;GO:0006260//DNA replication;GO:0034641//cellular nitrogen compound metabolic process;GO:0034645//cellular macromolecule biosynthetic process;GO:0006139//nucleobase-contain…
UNIGENE0000435	ID_234	6	--	-	-	-	-
UNIGENE0000438	ID_235	4	non-ltr retroelement reverse transcriptase [Rosa rugosa]	-	-	-	-
UNIGENE0000441	ID_236	3	PREDICTED: ent-kaur-16-ene synthase, chloroplastic isoform X4 [Cucumis melo]	ko00904//Diterpenoid biosynthesis//Metabolism of terpenoids and polyketides//Metabolism	GO:0044424//intracellular part;GO:0005737//cytoplasm;GO:0043231//intracellular membrane-bounded organelle;GO:0044444//cytoplasmic part;GO:0043227//membrane-bounded organelle;GO:0043229//intracellular organelle;GO:0005623//cell;GO:0009536//plastid;GO:0005622//intracellular;GO:0044464//cell part;GO:0043226//organelle	GO:0016835//carbon-oxygen lyase activity;GO:0003824//catalytic activity;GO:0046872//metal ion binding;GO:0043167//ion binding;GO:0016829//lyase activity;GO:0005488//binding;GO:0016838//carbon-oxygen lyase activity, acting on phosphates;GO:0043169//cation binding;GO:0010333//terpene synthase activity	GO:0044763//single-organism cellular process;GO:0008152//metabolic process;GO:0044699//single-organism process;GO:0009987//cellular process
UNIGENE0000442	ID_237	5	--	-	-	-	-
UNIGENE0000443	ID_238	23	PREDICTED: ankyrin repeat-containing protein At5g02620-like [Cucumis sativus]	-	-	-	-
UNIGENE0000445	ID_239	17	BnaC03g12770D [Brassica napus]	-	-	-	-
UNIGENE0000446	ID_240	10	calcium-binding EF hand family protein [Populus trichocarpa]	-	GO:0005622//intracellular;GO:0044464//cell part;GO:0044424//intracellular part;GO:0005737//cytoplasm;GO:0005623//cell;GO:0044444//cytoplasmic part	GO:0005488//binding;GO:0046872//metal ion binding;GO:0043167//ion binding;GO:0043169//cation binding	-
UNIGENE0000449	ID_241	12	--	-	-	-	-
UNIGENE0000451	ID_242	7	PREDICTED: putative ribonuclease H protein At1g65750 [Malus domestica]	-	-	-	-
UNIGENE0000452	ID_243	10	PREDICTED: LRR receptor-like serine/threonine-protein kinase GSO1-like [Citrus sinensis]	-	-	GO:0005488//binding;GO:0043167//ion binding	-
UNIGENE0000453	ID_244	21	PREDICTED: expansin-like A3 isoform X3 [Cucumis melo]	-	-	-	GO:0000003//reproduction
UNIGENE0000454	ID_245	11	hypothetical protein (mitochondrion) [Vicia faba]	-	GO:0043231//intracellular membrane-bounded organelle;GO:0044464//cell part;GO:0043227//membrane-bounded organelle;GO:0043229//intracellular organelle;GO:0005622//intracellular;GO:0005623//cell;GO:0043226//organelle;GO:0044424//intracellular part	-	-
UNIGENE0000455	ID_246	20	PREDICTED: glutamate receptor 2.7-like [Cucumis melo]	-	-	-	GO:0044699//single-organism process
UNIGENE0000457	ID_247	18	Retrovirus-related Pol polyprotein from transposon TNT 1-94, partial [Glycine soja]	-	-	GO:0005488//binding;GO:1901363//heterocyclic compound binding;GO:0097159//organic cyclic compound binding;GO:0003676//nucleic acid binding	GO:0046483//heterocycle metabolic process;GO:0006807//nitrogen compound metabolic process;GO:0034641//cellular nitrogen compound metabolic process;GO:0071704//organic substance metabolic process;GO:1901360//organic cyclic compound metabolic process;GO:0044237//cellular metabolic process;GO:0044260//cellular macromolecule metabolic process;GO:0044238//primary metabolic process;GO:0006259//DNA meta…
UNIGENE0000458	ID_248	6	--	-	-	-	-
UNIGENE0000459	ID_249	12	--	-	-	-	-
UNIGENE0000465	ID_250	9	PREDICTED: UDP-glucuronate 4-epimerase 1-like [Cucumis melo]	ko00500//Starch and sucrose metabolism//Carbohydrate metabolism//Metabolism;ko00520//Amino sugar and nucleotide sugar metabolism//Carbohydrate metabolism//Metabolism	GO:0043229//intracellular organelle;GO:0044446//intracellular organelle part;GO:0031224//intrinsic component of membrane;GO:0031984//organelle subcompartment;GO:0012505//endomembrane system;GO:0005622//intracellular;GO:0044422//organelle part;GO:0044464//cell part;GO:0044425//membrane part;GO:0016020//membrane;GO:0000139//Golgi membrane;GO:0031090//organelle membrane;GO:0044431//Golgi apparatus p…	GO:0003824//catalytic activity;GO:0048037//cofactor binding;GO:0005488//binding;GO:0016857//racemase and epimerase activity, acting on carbohydrates and derivatives;GO:0016854//racemase and epimerase activity;GO:0016853//isomerase activity	GO:0044238//primary metabolic process;GO:0008152//metabolic process
UNIGENE0000468	ID_251	5	PREDICTED: probable GPI-anchored adhesin-like protein PGA55 isoform X2 [Cucumis melo]	-	-	-	-
UNIGENE0000469	ID_252	16	PREDICTED: expansin-B3-like [Cucumis melo]	-	-	-	GO:0000003//reproduction
UNIGENE0000470	ID_253	21	--	-	-	-	-
UNIGENE0000473	ID_254	12	--	-	-	-	-
UNIGENE0000475	ID_255	12	--	-	-	-	-
UNIGENE0000476	ID_256	7	--	-	-	-	-
UNIGENE0000477	ID_257	17	PREDICTED: peptide methionine sulfoxide reductase B5 [Cucumis sativus]	-	GO:0043227//membrane-bounded organelle;GO:0005623//cell;GO:0044464//cell part;GO:0043226//organelle;GO:0043231//intracellular membrane-bounded organelle;GO:0044424//intracellular part;GO:0043229//intracellular organelle;GO:0005622//intracellular	GO:0003824//catalytic activity;GO:0016491//oxidoreductase activity;GO:0016667//oxidoreductase activity, acting on a sulfur group of donors;GO:0005488//binding;GO:0016671//oxidoreductase activity, acting on a sulfur group of donors, disulfide as acceptor;GO:0043169//cation binding;GO:0043167//ion binding	GO:0009266//response to temperature stimulus;GO:0008152//metabolic process;GO:0006979//response to oxidative stress;GO:0044699//single-organism process;GO:0009409//response to cold;GO:0043170//macromolecule metabolic process;GO:0006643//membrane lipid metabolic process;GO:0009415//response to water;GO:0044763//single-organism cellular process;GO:0009991//response to extracellular stimulus;GO:0031…
UNIGENE0000478	ID_258	17	--	-	-	-	-
UNIGENE0000479	ID_259	18	PREDICTED: CLAVATA3/ESR (CLE)-related protein 45-like [Solanum tuberosum]	-	-	-	-
UNIGENE0000480	ID_260	7	--	-	-	-	-
UNIGENE0000481	ID_261	13	PREDICTED: secoisolariciresinol dehydrogenase-like [Cucumis melo]	-	-	GO:0016616//oxidoreductase activity, acting on the CH-OH group of donors, NAD or NADP as acceptor;GO:0003824//catalytic activity;GO:0016491//oxidoreductase activity;GO:0016614//oxidoreductase activity, acting on CH-OH group of donors	GO:0044699//single-organism process;GO:0008152//metabolic process;GO:0044710//single-organism metabolic process
UNIGENE0000483	ID_262	12	--	-	-	-	-
UNIGENE0000485	ID_263	3	--	-	-	-	-
UNIGENE0000487	ID_264	15	PREDICTED: GATA transcription factor 21 [Cucumis melo]	-	-	GO:0005488//binding	-
UNIGENE0000488	ID_265	15	--	-	-	-	-
UNIGENE0000490	ID_266	12	--	-	-	-	-
UNIGENE0000491	ID_267	7	PREDICTED: pentatricopeptide repeat-containing protein At2g30100, chloroplastic [Cucumis sativus]	-	GO:0043226//organelle;GO:0005623//cell;GO:0044424//intracellular part;GO:0044444//cytoplasmic part;GO:0005737//cytoplasm;GO:0044464//cell part;GO:0005622//intracellular;GO:0043227//membrane-bounded organelle;GO:0009536//plastid;GO:0043231//intracellular membrane-bounded organelle;GO:0043229//intracellular organelle	-	-
UNIGENE0000492	ID_268	10	PREDICTED: transcription factor UNE12-like isoform X2 [Cucumis sativus]	-	-	GO:0005488//binding;GO:0005515//protein binding	-
UNIGENE0000493	ID_269	7	--	-	-	-	-
UNIGENE0000495	ID_270	17	--	-	-	-	-
UNIGENE0000496	ID_271	18	--	-	-	-	-
UNIGENE0000498	ID_272	20	PREDICTED: lactoylglutathione lyase [Cucumis melo]	-	-	GO:0003824//catalytic activity	GO:0051235//maintenance of location;GO:0009266//response to temperature stimulus;GO:0006950//response to stress;GO:0050896//response to stimulus;GO:0006720//isoprenoid metabolic process;GO:0009409//response to cold;GO:0006629//lipid metabolic process;GO:0065007//biological regulation;GO:0044238//primary metabolic process;GO:0032501//multicellular organismal process;GO:0044255//cellular lipid meta…
UNIGENE0000499	ID_273	12	--	-	-	-	-
UNIGENE0000500	ID_274	12	--	-	-	-	-
UNIGENE0000501	ID_275	7	--	-	-	-	-
UNIGENE0000503	ID_276	7	--	-	-	-	-
UNIGENE0000504	ID_277	12	--	-	-	-	-
UNIGENE0000506	ID_278	7	--	-	-	-	-
UNIGENE0000509	ID_279	21	PREDICTED: chitinase 1-like [Cucumis sativus]	ko00520//Amino sugar and nucleotide sugar metabolism//Carbohydrate metabolism//Metabolism	-	GO:0016787//hydrolase activity;GO:0016798//hydrolase activity, acting on glycosyl bonds;GO:0005488//binding;GO:0097367//carbohydrate derivative binding;GO:0003824//catalytic activity;GO:0004553//hydrolase activity, hydrolyzing O-glycosyl compounds	GO:0071704//organic substance metabolic process;GO:0006022//aminoglycan metabolic process;GO:0071554//cell wall organization or biogenesis;GO:1901564//organonitrogen compound metabolic process;GO:0044260//cellular macromolecule metabolic process;GO:1901136//carbohydrate derivative catabolic process;GO:0009987//cellular process;GO:0006026//aminoglycan catabolic process;GO:0006807//nitrogen compoun…
UNIGENE0000510	ID_280	20	--	-	-	-	-
UNIGENE0000516	ID_281	3	--	-	-	-	-
UNIGENE0000517	ID_282	9	JHL23C09.7 [Jatropha curcas]	-	-	-	-
UNIGENE0000518	ID_283	21	PREDICTED: omega-hydroxypalmitate O-feruloyl transferase-like [Gossypium raimondii]	ko00073//Cutin, suberine and wax biosynthesis//Lipid metabolism//Metabolism	-	GO:0016746//transferase activity, transferring acyl groups;GO:0003824//catalytic activity;GO:0016740//transferase activity	-
UNIGENE0000519	ID_284	12	PREDICTED: LRR receptor-like serine/threonine-protein kinase GSO1-like [Citrus sinensis]	-	-	-	-
UNIGENE0000521	ID_285	22	--	-	-	-	-
UNIGENE0000522	ID_286	21	--	-	-	-	-
UNIGENE0000527	ID_287	9	PREDICTED: retrovirus-related Pol polyprotein from transposon TNT 1-94 isoform X3 [Cucumis melo]	-	-	-	-
UNIGENE0000528	ID_288	12	--	-	-	-	-
UNIGENE0000533	ID_289	7	PREDICTED: protein YLS9 [Prunus mume]	-	-	-	-
UNIGENE0000534	ID_290	6	--	-	-	-	-
UNIGENE0000535	ID_291	21	cytosolic glyceraldehyde-3-phosphate dehydrogenase, partial [Gracilariopsis lemaneiformis]	ko01200//Carbon metabolism//Global and Overview//Metabolism;ko01230//Biosynthesis of amino acids//Global and Overview//Metabolism;ko00010//Glycolysis / Gluconeogenesis//Carbohydrate metabolism//Metabolism;ko00710//Carbon fixation in photosynthetic organisms//Energy metabolism//Metabolism	GO:0044424//intracellular part;GO:0043231//intracellular membrane-bounded organelle;GO:0043229//intracellular organelle;GO:0005622//intracellular;GO:0043227//membrane-bounded organelle;GO:0043226//organelle;GO:0044464//cell part;GO:0005623//cell	GO:0097159//organic cyclic compound binding;GO:0036094//small molecule binding;GO:0003824//catalytic activity;GO:1901363//heterocyclic compound binding;GO:0016491//oxidoreductase activity;GO:0016903//oxidoreductase activity, acting on the aldehyde or oxo group of donors;GO:0005488//binding;GO:0000166//nucleotide binding;GO:0016620//oxidoreductase activity, acting on the aldehyde or oxo group of d…	GO:0071704//organic substance metabolic process;GO:0044699//single-organism process;GO:0044723//single-organism carbohydrate metabolic process;GO:0006082//organic acid metabolic process;GO:0043436//oxoacid metabolic process;GO:0032787//monocarboxylic acid metabolic process;GO:0005975//carbohydrate metabolic process;GO:0044763//single-organism cellular process;GO:0005996//monosaccharide metabolic …
UNIGENE0000537	ID_292	12	--	-	-	-	-
UNIGENE0000538	ID_293	12	--	-	-	-	-
UNIGENE0000542	ID_294	0	PREDICTED: protein ALUMINUM SENSITIVE 3 [Cucumis sativus]	-	GO:0031224//intrinsic component of membrane;GO:0044425//membrane part;GO:0016020//membrane	-	GO:0042221//response to chemical;GO:0010038//response to metal ion;GO:0010035//response to inorganic substance;GO:0050896//response to stimulus
UNIGENE0000543	ID_295	11	--	-	-	-	-
UNIGENE0000544	ID_296	25	PREDICTED: CASP-like protein VIT_05s0020g01830 [Cucumis melo]	-	GO:0016020//membrane	-	-
UNIGENE0000545	ID_297	15	PREDICTED: CASP-like protein VIT_05s0020g01830 [Cucumis melo]	-	GO:0016020//membrane	-	-
UNIGENE0000546	ID_298	17	PREDICTED: suppressor protein SRP40-like [Citrus sinensis]	-	-	-	-
UNIGENE0000548	ID_299	12	PREDICTED: putative ribonuclease H protein At1g65750 [Cucumis melo]	-	-	-	-
UNIGENE0000549	ID_300	12	--	-	-	-	-
UNIGENE0000551	ID_301	12	--	-	-	-	-
UNIGENE0000553	ID_302	21	--	-	-	-	-
UNIGENE0000554	ID_303	11	--	-	-	-	-
UNIGENE0000555	ID_304	7	--	-	-	-	-
UNIGENE0000556	ID_305	9	--	-	-	-	-
UNIGENE0000557	ID_306	10	--	-	-	-	-
UNIGENE0000558	ID_307	10	--	-	-	-	-
UNIGENE0000559	ID_308	6	hypothetical protein PRUPE_ppa015871mg, partial [Prunus persica]	-	-	-	-
UNIGENE0000566	ID_309	17	PREDICTED: endoplasmic reticulum oxidoreductin-1-like [Malus domestica]	ko04141//Protein processing in endoplasmic reticulum//Folding, sorting and degradation//Genetic Information Processing	-	-	-
UNIGENE0000567	ID_310	11	PREDICTED: salicylic acid-binding protein 2-like [Cucumis melo]	-	-	-	-
UNIGENE0000570	ID_311	20	--	-	-	-	-
UNIGENE0000571	ID_312	20	--	-	-	-	-
UNIGENE0000573	ID_313	12	--	-	-	-	-
UNIGENE0000576	ID_314	7	--	-	-	-	-
UNIGENE0000577	ID_315	11	--	-	-	-	-
UNIGENE0000578	ID_316	9	transcription factor KAN2 [Medicago truncatula]	-	-	-	GO:0048856//anatomical structure development;GO:0048731//system development;GO:0032501//multicellular organismal process;GO:0009987//cellular process;GO:0007389//pattern specification process;GO:0044699//single-organism process;GO:0044767//single-organism developmental process;GO:0032502//developmental process;GO:0048513//organ development;GO:0003002//regionalization;GO:0007275//multicellular org…
UNIGENE0000579	ID_317	12	--	-	-	-	-
UNIGENE0000581	ID_318	6	--	-	-	-	-
UNIGENE0000587	ID_319	12	--	-	-	-	-
UNIGENE0000588	ID_320	18	--	-	-	-	-
UNIGENE0000590	ID_321	16	PREDICTED: pentatricopeptide repeat-containing protein At5g56310-like [Cucumis melo]	-	-	-	-
UNIGENE0000592	ID_322	12	--	-	-	-	-
UNIGENE0000599	ID_323	21	--	-	-	-	-
UNIGENE0000600	ID_324	5	--	-	-	-	-
UNIGENE0000601	ID_325	12	--	-	-	-	-
UNIGENE0000602	ID_326	9	PREDICTED: chloride conductance regulatory protein ICln isoform X1 [Cucumis sativus]	ko03013//RNA transport//Translation//Genetic Information Processing	GO:1902494//catalytic complex;GO:0005622//intracellular;GO:0016020//membrane;GO:0032991//macromolecular complex;GO:0043226//organelle;GO:0043231//intracellular membrane-bounded organelle;GO:0043229//intracellular organelle;GO:0044424//intracellular part;GO:0005737//cytoplasm;GO:0044444//cytoplasmic part;GO:0043227//membrane-bounded organelle;GO:0034708//methyltransferase complex;GO:0005623//cell;…	GO:0015075//ion transmembrane transporter activity;GO:0022857//transmembrane transporter activity;GO:0005215//transporter activity;GO:0022891//substrate-specific transmembrane transporter activity;GO:0022892//substrate-specific transporter activity	GO:0000375//RNA splicing, via transesterification reactions;GO:0065008//regulation of biological quality;GO:0071840//cellular component organization or biogenesis;GO:0034641//cellular nitrogen compound metabolic process;GO:0051234//establishment of localization;GO:0006139//nucleobase-containing compound metabolic process;GO:0019538//protein metabolic process;GO:0006464//cellular protein modificat…
UNIGENE0000605	ID_327	6	--	-	-	-	-
UNIGENE0000606	ID_328	21	PREDICTED: dentin sialophosphoprotein isoform X3 [Cucumis melo]	-	-	-	-
UNIGENE0000607	ID_329	6	--	-	-	-	-
UNIGENE0000608	ID_330	12	--	-	-	-	-
UNIGENE0000609	ID_331	12	PREDICTED: ATP-dependent Clp protease proteolytic subunit-related protein 4, chloroplastic [Cucumis melo]	-	GO:0044464//cell part;GO:0005737//cytoplasm;GO:0009526//plastid envelope;GO:0044424//intracellular part;GO:0044446//intracellular organelle part;GO:0043231//intracellular membrane-bounded organelle;GO:0005622//intracellular;GO:0044422//organelle part;GO:0009536//plastid;GO:0043227//membrane-bounded organelle;GO:0005623//cell;GO:0043229//intracellular organelle;GO:0031975//envelope;GO:0009532//pla…	GO:0008233//peptidase activity;GO:0003824//catalytic activity;GO:0070011//peptidase activity, acting on L-amino acid peptides;GO:0004175//endopeptidase activity;GO:0016787//hydrolase activity	GO:0071704//organic substance metabolic process;GO:0010467//gene expression;GO:0043207//response to external biotic stimulus;GO:0008104//protein localization;GO:0051179//localization;GO:0006090//pyruvate metabolic process;GO:0019538//protein metabolic process;GO:0098542//defense response to other organism;GO:0044699//single-organism process;GO:0044281//small molecule metabolic process;GO:0006950/…
UNIGENE0000610	ID_332	12	PREDICTED: ATP-dependent Clp protease proteolytic subunit-related protein 4, chloroplastic [Cucumis melo]	-	GO:0009536//plastid;GO:0009532//plastid stroma;GO:0044424//intracellular part;GO:0043231//intracellular membrane-bounded organelle;GO:0005622//intracellular;GO:0044444//cytoplasmic part;GO:0031975//envelope;GO:0044446//intracellular organelle part;GO:0044464//cell part;GO:0043229//intracellular organelle;GO:0031967//organelle envelope;GO:0005737//cytoplasm;GO:0043226//organelle;GO:0009526//plasti…	GO:0004175//endopeptidase activity;GO:0016787//hydrolase activity;GO:0070011//peptidase activity, acting on L-amino acid peptides;GO:0008233//peptidase activity;GO:0003824//catalytic activity	GO:0002376//immune system process;GO:0051707//response to other organism;GO:0045087//innate immune response;GO:0006950//response to stress;GO:0050896//response to stimulus;GO:0043207//response to external biotic stimulus;GO:0009987//cellular process;GO:0044763//single-organism cellular process;GO:0006955//immune response;GO:0043170//macromolecule metabolic process;GO:0044237//cellular metabolic p…
UNIGENE0000611	ID_333	12	--	-	-	-	-
UNIGENE0000620	ID_334	10	--	-	-	-	-
UNIGENE0000621	ID_335	12	PREDICTED: transmembrane 9 superfamily member 4-like [Cucumis melo]	-	GO:0031224//intrinsic component of membrane;GO:0044425//membrane part;GO:0016020//membrane	-	GO:0044238//primary metabolic process;GO:0043170//macromolecule metabolic process;GO:0019538//protein metabolic process;GO:0008152//metabolic process;GO:0009058//biosynthetic process;GO:0044237//cellular metabolic process;GO:0034645//cellular macromolecule biosynthetic process;GO:0009059//macromolecule biosynthetic process;GO:0071704//organic substance metabolic process;GO:0009987//cellular proce…
UNIGENE0000622	ID_336	7	PREDICTED: E3 ubiquitin-protein ligase SGR9, amyloplastic [Cucumis melo]	-	-	GO:0043167//ion binding;GO:0046872//metal ion binding;GO:0046914//transition metal ion binding;GO:0043169//cation binding;GO:0005488//binding	-
UNIGENE0000627	ID_337	13	PREDICTED: UDP-glycosyltransferase 91A1-like [Cucumis melo]	-	-	GO:0003824//catalytic activity;GO:0016740//transferase activity;GO:0016757//transferase activity, transferring glycosyl groups	-
UNIGENE0000628	ID_338	12	--	-	-	-	-
UNIGENE0000635	ID_339	12	--	-	-	-	-
UNIGENE0000636	ID_340	12	--	-	-	-	-
UNIGENE0000637	ID_341	2	hypothetical protein Csa_1G042410 [Cucumis sativus]	-	-	-	-
UNIGENE0000641	ID_342	12	--	-	-	-	-
UNIGENE0000645	ID_343	3	PREDICTED: zinc finger BED domain-containing protein RICESLEEPER 2-like [Tarenaya hassleriana]	-	-	GO:0005488//binding	-
UNIGENE0000646	ID_344	20	HSP20.3 [Citrullus lanatus]	ko04141//Protein processing in endoplasmic reticulum//Folding, sorting and degradation//Genetic Information Processing	GO:0043229//intracellular organelle;GO:0044464//cell part;GO:0005783//endoplasmic reticulum;GO:0043226//organelle;GO:0012505//endomembrane system;GO:0005623//cell;GO:0044424//intracellular part;GO:0005622//intracellular;GO:0005737//cytoplasm;GO:0044432//endoplasmic reticulum part;GO:0044422//organelle part;GO:0043231//intracellular membrane-bounded organelle;GO:0044444//cytoplasmic part;GO:004322…	-	GO:0044260//cellular macromolecule metabolic process;GO:1901700//response to oxygen-containing compound;GO:0050896//response to stimulus;GO:0044238//primary metabolic process;GO:0044267//cellular protein metabolic process;GO:0042221//response to chemical;GO:0044237//cellular metabolic process;GO:0009642//response to light intensity;GO:0009628//response to abiotic stimulus;GO:0009987//cellular pro…
UNIGENE0000647	ID_345	10	--	-	-	-	-
UNIGENE0000650	ID_346	12	--	-	-	-	-
UNIGENE0000653	ID_347	11	--	-	-	-	-
UNIGENE0000658	ID_348	13	--	-	-	-	-
UNIGENE0000660	ID_349	12	RING/U-box superfamily protein isoform 1 [Theobroma cacao]	-	GO:0016020//membrane	GO:0043167//ion binding;GO:0043169//cation binding;GO:0005488//binding;GO:0046872//metal ion binding	-
UNIGENE0000664	ID_350	12	--	-	-	-	-
UNIGENE0000666	ID_351	12	--	-	-	-	-
UNIGENE0000667	ID_352	21	--	-	-	-	-
UNIGENE0000668	ID_353	11	RNA-directed DNA polymerase (Reverse transcriptase) [Medicago truncatula]	-	-	-	-
UNIGENE0000669	ID_354	6	--	-	-	-	-
UNIGENE0000670	ID_355	10	--	-	-	-	-
UNIGENE0000671	ID_356	6	--	-	-	-	-
UNIGENE0000672	ID_357	10	--	-	-	-	-
UNIGENE0000675	ID_358	2	PREDICTED: ethylene-responsive transcription factor 5 [Cucumis melo]	-	-	GO:1901363//heterocyclic compound binding;GO:0005488//binding;GO:0001071//nucleic acid binding transcription factor activity;GO:0003676//nucleic acid binding;GO:0097159//organic cyclic compound binding	GO:0050789//regulation of biological process;GO:0019222//regulation of metabolic process;GO:0060255//regulation of macromolecule metabolic process;GO:0065007//biological regulation;GO:0010468//regulation of gene expression
UNIGENE0000676	ID_359	6	--	-	-	-	-
UNIGENE0000681	ID_360	14	PREDICTED: beta-galactosidase 5 [Cucumis sativus]	-	GO:0005576//extracellular region	GO:0005488//binding;GO:0016798//hydrolase activity, acting on glycosyl bonds;GO:0015925//galactosidase activity;GO:0004553//hydrolase activity, hydrolyzing O-glycosyl compounds;GO:0003824//catalytic activity;GO:0016787//hydrolase activity	GO:0071554//cell wall organization or biogenesis;GO:0016043//cellular component organization;GO:0006595//polyamine metabolic process;GO:0008152//metabolic process;GO:0009308//amine metabolic process;GO:0051239//regulation of multicellular organismal process;GO:2000026//regulation of multicellular organismal development;GO:0045229//external encapsulating structure organization;GO:0006576//cellular…
UNIGENE0000682	ID_361	11	--	-	-	-	-
UNIGENE0000683	ID_362	12	--	-	-	-	-
UNIGENE0000684	ID_363	10	--	-	-	-	-
UNIGENE0000687	ID_364	12	PREDICTED: probable membrane-associated kinase regulator 1 [Cucumis melo]	-	GO:0016020//membrane	-	GO:0008152//metabolic process;GO:0010033//response to organic substance;GO:0044699//single-organism process;GO:0050896//response to stimulus;GO:0009725//response to hormone;GO:0050794//regulation of cellular process;GO:0009719//response to endogenous stimulus;GO:0033993//response to lipid;GO:0065007//biological regulation;GO:0014070//response to organic cyclic compound;GO:0050789//regulation of b…
UNIGENE0000691	ID_365	11	PREDICTED: BES1/BZR1 homolog protein 4 [Cucumis sativus]	-	-	-	GO:0010468//regulation of gene expression;GO:0065007//biological regulation;GO:0019222//regulation of metabolic process;GO:0050789//regulation of biological process;GO:0060255//regulation of macromolecule metabolic process
UNIGENE0000693	ID_366	21	PREDICTED: CASP-like protein POPTRDRAFT_823430 [Cucumis melo]	-	GO:0016020//membrane	-	-
UNIGENE0000694	ID_367	21	PREDICTED: CASP-like protein 1F2 [Cucumis sativus]	-	GO:0016020//membrane;GO:0044425//membrane part;GO:0031224//intrinsic component of membrane	-	-
UNIGENE0000695	ID_368	18	PREDICTED: transcription factor bHLH13-like [Populus euphratica]	-	-	GO:0005488//binding;GO:0005515//protein binding	GO:0043170//macromolecule metabolic process;GO:0044260//cellular macromolecule metabolic process;GO:0009987//cellular process;GO:0009058//biosynthetic process;GO:1901576//organic substance biosynthetic process;GO:0044249//cellular biosynthetic process;GO:0009059//macromolecule biosynthetic process;GO:0044237//cellular metabolic process;GO:0008152//metabolic process;GO:0010467//gene expression;GO:…
UNIGENE0000699	ID_369	12	--	-	-	-	-
UNIGENE0000700	ID_370	4	--	-	-	-	-
UNIGENE0000702	ID_371	21	--	-	-	-	-
UNIGENE0000703	ID_372	8	PREDICTED: metal tolerance protein B [Cucumis melo]	-	GO:0044425//membrane part;GO:0005622//intracellular;GO:0043229//intracellular organelle;GO:0043227//membrane-bounded organelle;GO:0005623//cell;GO:0044464//cell part;GO:0044424//intracellular part;GO:0031224//intrinsic component of membrane;GO:0016020//membrane;GO:0043231//intracellular membrane-bounded organelle;GO:0043226//organelle	GO:0022892//substrate-specific transporter activity;GO:0022857//transmembrane transporter activity;GO:0015075//ion transmembrane transporter activity;GO:0005215//transporter activity;GO:0022891//substrate-specific transmembrane transporter activity	GO:0009987//cellular process;GO:0051234//establishment of localization;GO:0016043//cellular component organization;GO:0044765//single-organism transport;GO:0006810//transport;GO:0044699//single-organism process;GO:0044763//single-organism cellular process;GO:0051179//localization;GO:0006812//cation transport;GO:0071840//cellular component organization or biogenesis;GO:0006811//ion transport;GO:19…
UNIGENE0000706	ID_373	25	PREDICTED: mitochondrial-processing peptidase subunit alpha-like [Cucumis melo]	-	-	GO:0043167//ion binding;GO:0004175//endopeptidase activity;GO:0005488//binding;GO:0003824//catalytic activity;GO:0043169//cation binding;GO:0070011//peptidase activity, acting on L-amino acid peptides;GO:0016787//hydrolase activity;GO:0008233//peptidase activity	GO:0043170//macromolecule metabolic process;GO:0044238//primary metabolic process;GO:0008152//metabolic process;GO:0071704//organic substance metabolic process;GO:0019538//protein metabolic process
UNIGENE0000708	ID_374	21	--	-	-	-	-
UNIGENE0000710	ID_375	12	--	-	-	-	-
UNIGENE0000711	ID_376	3	--	-	-	-	-
UNIGENE0000712	ID_377	12	--	-	-	-	-
UNIGENE0000713	ID_378	12	--	-	-	-	-
UNIGENE0000715	ID_379	4	--	-	-	-	-
UNIGENE0000716	ID_380	3	--	-	-	-	-
UNIGENE0000718	ID_381	1	--	-	-	-	-
UNIGENE0000723	ID_382	15	--	-	-	-	-
UNIGENE0000726	ID_383	12	--	-	-	-	-
UNIGENE0000729	ID_384	6	PREDICTED: pentatricopeptide repeat-containing protein At5g39980, chloroplastic [Cucumis melo]	-	GO:0044464//cell part;GO:0005623//cell;GO:0043227//membrane-bounded organelle;GO:0044444//cytoplasmic part;GO:0043231//intracellular membrane-bounded organelle;GO:0043229//intracellular organelle;GO:0005737//cytoplasm;GO:0009536//plastid;GO:0044424//intracellular part;GO:0043226//organelle;GO:0005622//intracellular	-	-
UNIGENE0000730	ID_385	24	PREDICTED: pentatricopeptide repeat-containing protein At5g39980, chloroplastic [Cucumis melo]	-	-	-	-
UNIGENE0000733	ID_386	7	BnaA05g37210D [Brassica napus]	-	-	-	-
UNIGENE0000737	ID_387	12	--	-	-	-	-
UNIGENE0000738	ID_388	2	--	-	-	-	-
UNIGENE0000739	ID_389	7	--	-	-	-	-
UNIGENE0000740	ID_390	5	PREDICTED: probable rhamnogalacturonate lyase B [Cucumis melo]	-	-	GO:0005488//binding;GO:0003824//catalytic activity	GO:0044238//primary metabolic process;GO:0008152//metabolic process
UNIGENE0000743	ID_391	19	PREDICTED: small heat shock protein, chloroplastic [Cucumis melo]	ko04141//Protein processing in endoplasmic reticulum//Folding, sorting and degradation//Genetic Information Processing	-	-	-
UNIGENE0000744	ID_392	9	--	-	-	-	-
UNIGENE0000745	ID_393	3	--	-	-	-	-
UNIGENE0000747	ID_394	15	--	-	-	-	-
UNIGENE0000748	ID_395	7	Stress responsive A/B Barrel Domain [Theobroma cacao]	-	GO:0009536//plastid;GO:0044424//intracellular part;GO:0005737//cytoplasm;GO:0043229//intracellular organelle;GO:0044464//cell part;GO:0044444//cytoplasmic part;GO:0043226//organelle;GO:0043231//intracellular membrane-bounded organelle;GO:0005622//intracellular;GO:0043227//membrane-bounded organelle;GO:0005623//cell	GO:0005488//binding;GO:0043167//ion binding;GO:0043169//cation binding	-
UNIGENE0000750	ID_396	4	--	-	-	-	-
UNIGENE0000753	ID_397	2	--	-	-	-	-
UNIGENE0000754	ID_398	12	Ty3/gypsy retrotransposon protein [Beta vulgaris subsp. vulgaris]	-	-	-	GO:0044237//cellular metabolic process;GO:0046483//heterocycle metabolic process;GO:0032774//RNA biosynthetic process;GO:0016070//RNA metabolic process;GO:0009058//biosynthetic process;GO:0006139//nucleobase-containing compound metabolic process;GO:1901360//organic cyclic compound metabolic process;GO:0044249//cellular biosynthetic process;GO:0008152//metabolic process;GO:1901576//organic substan…
UNIGENE0000756	ID_399	11	--	-	-	-	-
UNIGENE0000757	ID_400	5	PREDICTED: vitellogenin-2-like [Glycine max]	-	-	-	-
UNIGENE0000762	ID_401	18	--	-	-	-	-
UNIGENE0000763	ID_402	12	PREDICTED: disease resistance protein RGA2-like [Cucumis sativus]	-	-	GO:0032550//purine ribonucleoside binding;GO:0005488//binding;GO:0036094//small molecule binding;GO:0001883//purine nucleoside binding;GO:1901363//heterocyclic compound binding;GO:0032549//ribonucleoside binding;GO:0097159//organic cyclic compound binding;GO:0097367//carbohydrate derivative binding;GO:0001882//nucleoside binding	-
UNIGENE0000765	ID_403	9	--	-	-	-	-
UNIGENE0000767	ID_404	3	Os11g0496500 [Oryza sativa Japonica Group]	-	-	-	-
UNIGENE0000768	ID_405	10	PREDICTED: aspartic proteinase Asp1-like [Cucumis melo]	-	-	GO:0004175//endopeptidase activity;GO:0003824//catalytic activity;GO:0016787//hydrolase activity;GO:0070011//peptidase activity, acting on L-amino acid peptides;GO:0008233//peptidase activity	GO:0043170//macromolecule metabolic process;GO:0019538//protein metabolic process;GO:0008152//metabolic process;GO:0071704//organic substance metabolic process;GO:0044238//primary metabolic process
UNIGENE0000769	ID_406	12	--	-	-	-	-
UNIGENE0000771	ID_407	11	--	-	-	-	-
UNIGENE0000773	ID_408	2	PREDICTED: polyol transporter 5-like [Jatropha curcas]	-	GO:0031224//intrinsic component of membrane;GO:0044425//membrane part;GO:0016020//membrane	GO:0016491//oxidoreductase activity;GO:0016628//oxidoreductase activity, acting on the CH-CH group of donors, NAD or NADP as acceptor;GO:0022857//transmembrane transporter activity;GO:0003824//catalytic activity;GO:0005215//transporter activity;GO:0016627//oxidoreductase activity, acting on the CH-CH group of donors	GO:0051179//localization;GO:0044710//single-organism metabolic process;GO:0009987//cellular process;GO:1902578//single-organism localization;GO:0051234//establishment of localization;GO:0008152//metabolic process;GO:0044699//single-organism process;GO:0044763//single-organism cellular process;GO:0006810//transport;GO:0044765//single-organism transport
UNIGENE0000774	ID_409	7	PREDICTED: polyol transporter 5-like [Jatropha curcas]	-	GO:0031224//intrinsic component of membrane;GO:0044425//membrane part;GO:0016020//membrane	GO:0005215//transporter activity;GO:0022857//transmembrane transporter activity	GO:0044763//single-organism cellular process;GO:0051234//establishment of localization;GO:0051179//localization;GO:0009987//cellular process;GO:0044699//single-organism process
UNIGENE0000775	ID_410	20	BnaC02g47840D [Brassica napus]	-	GO:0044425//membrane part;GO:0031224//intrinsic component of membrane;GO:0016020//membrane	GO:0003676//nucleic acid binding;GO:0097159//organic cyclic compound binding;GO:0005488//binding;GO:1901363//heterocyclic compound binding;GO:0005515//protein binding	-
UNIGENE0000776	ID_411	6	--	-	-	-	-
UNIGENE0000779	ID_412	12	MuDRA-like transposase [Cucumis melo]	-	-	GO:0005488//binding	-
UNIGENE0000780	ID_413	0	--	-	-	-	-
UNIGENE0000785	ID_414	7	--	-	-	-	-
UNIGENE0000788	ID_415	12	22.0 kDa heat shock protein [Medicago truncatula]	-	-	-	GO:0050896//response to stimulus
UNIGENE0000789	ID_416	17	PREDICTED: LOW QUALITY PROTEIN: probable GPI-anchored adhesin-like protein PGA55 [Cucumis melo]	-	-	-	-
UNIGENE0000790	ID_417	3	--	-	-	-	-
UNIGENE0000791	ID_418	24	PREDICTED: pentatricopeptide repeat-containing protein At1g11290-like [Cucumis sativus]	-	-	-	-
UNIGENE0000795	ID_419	11	--	-	-	-	-
UNIGENE0000796	ID_420	7	--	-	-	-	-
UNIGENE0000799	ID_421	12	--	-	-	-	-
UNIGENE0000800	ID_422	12	--	-	-	-	-
UNIGENE0000801	ID_423	12	--	-	-	-	-
UNIGENE0000802	ID_424	12	--	-	-	-	-
UNIGENE0000803	ID_425	10	--	-	-	-	-
UNIGENE0000806	ID_426	12	--	-	-	-	-
UNIGENE0000807	ID_427	7	--	-	-	-	-
UNIGENE0000808	ID_428	10	--	-	-	-	-
UNIGENE0000811	ID_429	20	bHLH family protein [Populus trichocarpa]	-	GO:0005622//intracellular;GO:0044424//intracellular part;GO:0043227//membrane-bounded organelle;GO:0043226//organelle;GO:0043229//intracellular organelle;GO:0044464//cell part;GO:0005623//cell;GO:0043231//intracellular membrane-bounded organelle	GO:0003676//nucleic acid binding;GO:1901363//heterocyclic compound binding;GO:0005488//binding;GO:0097159//organic cyclic compound binding;GO:0005515//protein binding	GO:1901576//organic substance biosynthetic process;GO:0009058//biosynthetic process;GO:0010468//regulation of gene expression;GO:0044260//cellular macromolecule metabolic process;GO:0009059//macromolecule biosynthetic process;GO:0065007//biological regulation;GO:0044237//cellular metabolic process;GO:0019222//regulation of metabolic process;GO:0009987//cellular process;GO:0071704//organic substan…
UNIGENE0000812	ID_430	21	PREDICTED: UDP-glycosyltransferase 73C6-like [Cucumis sativus]	-	-	GO:0016757//transferase activity, transferring glycosyl groups;GO:0016740//transferase activity;GO:0003824//catalytic activity	-
UNIGENE0000814	ID_431	23	PREDICTED: pentatricopeptide repeat-containing protein At3g29230-like isoform X1 [Cucumis sativus]	-	-	-	-
UNIGENE0000816	ID_432	17	PREDICTED: ORM1-like protein 3 [Cucumis melo]	-	GO:0043229//intracellular organelle;GO:0043231//intracellular membrane-bounded organelle;GO:0044464//cell part;GO:0031090//organelle membrane;GO:0016020//membrane;GO:0044424//intracellular part;GO:0043226//organelle;GO:0043227//membrane-bounded organelle;GO:0044422//organelle part;GO:0044425//membrane part;GO:0005623//cell;GO:0005622//intracellular;GO:0031224//intrinsic component of membrane	-	GO:0019637//organophosphate metabolic process;GO:0044255//cellular lipid metabolic process;GO:0044711//single-organism biosynthetic process;GO:0006796//phosphate-containing compound metabolic process;GO:0044260//cellular macromolecule metabolic process;GO:0008152//metabolic process;GO:0006629//lipid metabolic process;GO:0046474//glycerophospholipid biosynthetic process;GO:0044710//single-organism…
UNIGENE0000819	ID_433	6	PREDICTED: GDSL esterase/lipase At1g71691 [Cucumis sativus]	-	-	GO:0016787//hydrolase activity;GO:0016627//oxidoreductase activity, acting on the CH-CH group of donors;GO:0003824//catalytic activity;GO:0016491//oxidoreductase activity;GO:0016635//oxidoreductase activity, acting on the CH-CH group of donors, quinone or related compound as acceptor	GO:0044238//primary metabolic process;GO:0008152//metabolic process;GO:0044710//single-organism metabolic process;GO:0044237//cellular metabolic process;GO:0006629//lipid metabolic process;GO:0006720//isoprenoid metabolic process;GO:0071704//organic substance metabolic process;GO:0016119//carotene metabolic process;GO:0009987//cellular process;GO:0044255//cellular lipid metabolic process;GO:00422…
UNIGENE0000822	ID_434	10	PREDICTED: alpha-(1,4)-fucosyltransferase [Cucumis melo]	-	GO:0005622//intracellular;GO:0031224//intrinsic component of membrane;GO:0043226//organelle;GO:0044424//intracellular part;GO:0005623//cell;GO:0043227//membrane-bounded organelle;GO:0043229//intracellular organelle;GO:0043231//intracellular membrane-bounded organelle;GO:0044464//cell part;GO:0000139//Golgi membrane;GO:0044422//organelle part;GO:0031090//organelle membrane;GO:0005737//cytoplasm;GO…	GO:0016740//transferase activity;GO:0003824//catalytic activity;GO:0016757//transferase activity, transferring glycosyl groups;GO:0016758//transferase activity, transferring hexosyl groups	GO:0044237//cellular metabolic process;GO:0034645//cellular macromolecule biosynthetic process;GO:0044264//cellular polysaccharide metabolic process;GO:0036211//protein modification process;GO:0009059//macromolecule biosynthetic process;GO:0009987//cellular process;GO:0044710//single-organism metabolic process;GO:0044699//single-organism process;GO:0044711//single-organism biosynthetic process;GO…
UNIGENE0000823	ID_435	16	PREDICTED: alpha-(1,4)-fucosyltransferase [Cucumis melo]	-	GO:0043226//organelle;GO:0043231//intracellular membrane-bounded organelle;GO:0005623//cell;GO:0031090//organelle membrane;GO:0005622//intracellular;GO:0043229//intracellular organelle;GO:0016020//membrane;GO:0044464//cell part;GO:0044422//organelle part;GO:0000139//Golgi membrane;GO:0012505//endomembrane system;GO:0043227//membrane-bounded organelle;GO:0098588//bounding membrane of organelle;GO:…	GO:0016740//transferase activity;GO:0016757//transferase activity, transferring glycosyl groups;GO:0003824//catalytic activity;GO:0016758//transferase activity, transferring hexosyl groups	GO:0044249//cellular biosynthetic process;GO:0044723//single-organism carbohydrate metabolic process;GO:0044710//single-organism metabolic process;GO:0006464//cellular protein modification process;GO:0033692//cellular polysaccharide biosynthetic process;GO:0044237//cellular metabolic process;GO:0005976//polysaccharide metabolic process;GO:0071704//organic substance metabolic process;GO:0044711//s…
UNIGENE0000827	ID_436	13	--	-	-	-	-
UNIGENE0000828	ID_437	20	PREDICTED: transcription repressor OFP8-like [Cucumis sativus]	-	-	-	-
UNIGENE0000830	ID_438	1	--	-	-	-	-
UNIGENE0000833	ID_439	10	--	-	-	-	-
UNIGENE0000834	ID_440	12	--	-	-	-	-
UNIGENE0000835	ID_441	5	--	-	-	-	-
UNIGENE0000836	ID_442	23	PREDICTED: protein CHUP1, chloroplastic-like [Cucumis sativus]	-	-	-	-
UNIGENE0000837	ID_443	3	--	-	-	-	-
UNIGENE0000838	ID_444	12	--	-	-	-	-
UNIGENE0000839	ID_445	12	--	-	-	-	-
UNIGENE0000842	ID_446	18	ternary complex factor MIP1 [Zea mays]	-	-	-	-
UNIGENE0000843	ID_447	12	--	-	-	-	-
UNIGENE0000844	ID_448	14	OSJNBb0003A12.9 [Oryza sativa Japonica Group]	-	-	GO:0005488//binding	-
UNIGENE0000846	ID_449	12	--	-	-	-	-
UNIGENE0000852	ID_450	6	--	-	-	-	-
UNIGENE0000853	ID_451	6	--	-	-	-	-
UNIGENE0000855	ID_452	4	--	-	-	-	-
UNIGENE0000856	ID_453	12	PREDICTED: GEM-like protein 4 isoform X4 [Cucumis melo]	-	-	-	-
UNIGENE0000857	ID_454	14	--	-	-	-	-
UNIGENE0000861	ID_455	5	--	-	-	-	-
UNIGENE0000862	ID_456	6	--	-	-	-	-
UNIGENE0000863	ID_457	7	--	-	-	-	-
UNIGENE0000864	ID_458	12	RNA-directed DNA polymerase (Reverse transcriptase) [Medicago truncatula]	-	GO:0044430//cytoskeletal part;GO:0044422//organelle part;GO:0043226//organelle;GO:0032991//macromolecular complex;GO:0043229//intracellular organelle;GO:0044446//intracellular organelle part;GO:0044424//intracellular part;GO:0005622//intracellular;GO:0043232//intracellular non-membrane-bounded organelle;GO:0043234//protein complex;GO:0005623//cell;GO:0043228//non-membrane-bounded organelle;GO:000…	GO:0097159//organic cyclic compound binding;GO:0003824//catalytic activity;GO:1901363//heterocyclic compound binding;GO:0016787//hydrolase activity;GO:0005488//binding	GO:0008152//metabolic process;GO:0043170//macromolecule metabolic process;GO:0044763//single-organism cellular process;GO:0071704//organic substance metabolic process;GO:0044237//cellular metabolic process;GO:0044699//single-organism process;GO:0009987//cellular process;GO:0044238//primary metabolic process
UNIGENE0000867	ID_459	12	--	-	-	-	-
UNIGENE0000871	ID_460	12	--	-	-	-	-
UNIGENE0000873	ID_461	19	--	-	-	-	-
UNIGENE0000874	ID_462	4	--	-	-	-	-
UNIGENE0000875	ID_463	24	PREDICTED: polygalacturonase inhibitor-like [Cucumis melo]	-	GO:0005576//extracellular region	-	-
UNIGENE0000876	ID_464	12	GDT1-like protein 2 [Morus notabilis]	-	GO:0043227//membrane-bounded organelle;GO:0043226//organelle;GO:0005623//cell;GO:0044424//intracellular part;GO:0005622//intracellular;GO:0044464//cell part;GO:0043231//intracellular membrane-bounded organelle;GO:0043229//intracellular organelle	GO:0016787//hydrolase activity;GO:0008233//peptidase activity;GO:0004175//endopeptidase activity;GO:0003824//catalytic activity;GO:0005488//binding;GO:0070011//peptidase activity, acting on L-amino acid peptides;GO:1901363//heterocyclic compound binding;GO:0097159//organic cyclic compound binding	GO:1901362//organic cyclic compound biosynthetic process;GO:0097659//nucleic acid-templated transcription;GO:0009058//biosynthetic process;GO:0010467//gene expression;GO:0009059//macromolecule biosynthetic process;GO:0034641//cellular nitrogen compound metabolic process;GO:0006725//cellular aromatic compound metabolic process;GO:0019438//aromatic compound biosynthetic process;GO:0006807//nitrogen…
UNIGENE0000878	ID_465	20	PREDICTED: myb-like protein H isoform X1 [Populus euphratica]	-	-	-	-
UNIGENE0000879	ID_466	3	seed specific protein Bn15D1B [Brassica napus]	-	-	-	-
UNIGENE0000880	ID_467	6	--	-	-	-	-
UNIGENE0000888	ID_468	14	--	-	-	-	-
UNIGENE0000889	ID_469	12	PREDICTED: agglutinin-like [Cucumis melo]	-	-	GO:0043167//ion binding;GO:0016668//oxidoreductase activity, acting on a sulfur group of donors, NAD(P) as acceptor;GO:0016667//oxidoreductase activity, acting on a sulfur group of donors;GO:0046914//transition metal ion binding;GO:0005488//binding;GO:0046872//metal ion binding;GO:0016491//oxidoreductase activity;GO:0043169//cation binding;GO:0003824//catalytic activity;GO:0016651//oxidoreductase…	GO:0050789//regulation of biological process;GO:0065007//biological regulation;GO:0007154//cell communication;GO:0050896//response to stimulus;GO:0044700//single organism signaling;GO:0051716//cellular response to stimulus;GO:0008152//metabolic process;GO:0044763//single-organism cellular process;GO:0044710//single-organism metabolic process;GO:0009987//cellular process;GO:0044699//single-organis…
UNIGENE0000890	ID_470	12	--	-	-	-	-
UNIGENE0000891	ID_471	12	--	-	-	-	-
UNIGENE0000892	ID_472	12	--	-	-	-	-
UNIGENE0000893	ID_473	12	PREDICTED: retrovirus-related Pol polyprotein from transposon TNT 1-94 isoform X3 [Cucumis melo]	-	-	-	-
UNIGENE0000895	ID_474	21	bZIP-like protein [Oryza sativa Japonica Group]	-	GO:0044424//intracellular part;GO:0005622//intracellular;GO:0005623//cell;GO:0044464//cell part	GO:0005488//binding	-
UNIGENE0000896	ID_475	19	--	-	-	-	-
UNIGENE0000898	ID_476	2	--	-	-	-	-
UNIGENE0000899	ID_477	20	--	-	-	-	-
UNIGENE0000900	ID_478	9	PREDICTED: protein NRT1/ PTR FAMILY 5.8-like [Cucumis melo]	-	GO:0016020//membrane	GO:0022892//substrate-specific transporter activity;GO:0015075//ion transmembrane transporter activity;GO:0046943//carboxylic acid transmembrane transporter activity;GO:0022891//substrate-specific transmembrane transporter activity;GO:0022857//transmembrane transporter activity;GO:0005342//organic acid transmembrane transporter activity;GO:0005215//transporter activity;GO:0008514//organic anion t…	GO:0009605//response to external stimulus;GO:0051707//response to other organism;GO:0006810//transport;GO:0050896//response to stimulus;GO:0051704//multi-organism process;GO:1902578//single-organism localization;GO:0051234//establishment of localization;GO:0015833//peptide transport;GO:0044699//single-organism process;GO:0009607//response to biotic stimulus;GO:0051179//localization;GO:0071705//ni…
UNIGENE0000901	ID_479	12	--	-	-	-	-
UNIGENE0000902	ID_480	6	--	-	-	-	-
UNIGENE0000903	ID_481	6	pol protein [Cucumis melo subsp. melo]	-	-	GO:0043169//cation binding;GO:0043167//ion binding;GO:0005488//binding;GO:0046914//transition metal ion binding;GO:0097159//organic cyclic compound binding;GO:0046872//metal ion binding	GO:0006139//nucleobase-containing compound metabolic process;GO:0046483//heterocycle metabolic process;GO:0090304//nucleic acid metabolic process;GO:0008152//metabolic process;GO:0006807//nitrogen compound metabolic process;GO:0044260//cellular macromolecule metabolic process;GO:1901360//organic cyclic compound metabolic process;GO:0006259//DNA metabolic process;GO:0071704//organic substance meta…
UNIGENE0000904	ID_482	3	--	-	-	-	-
UNIGENE0000905	ID_483	14	--	-	-	-	-
UNIGENE0000906	ID_484	14	--	-	-	-	-
UNIGENE0000907	ID_485	22	PREDICTED: auxin-induced protein 15A-like [Cucumis sativus]	ko04075//Plant hormone signal transduction//Signal transduction//Environmental Information Processing	-	-	-
UNIGENE0000908	ID_486	6	--	-	-	-	-
UNIGENE0000909	ID_487	17	--	-	-	-	-
UNIGENE0000914	ID_488	12	--	-	-	-	-
UNIGENE0000915	ID_489	12	--	-	-	-	-
UNIGENE0000917	ID_490	3	PREDICTED: mini zinc finger protein 2 [Cucumis melo]	-	-	GO:0003676//nucleic acid binding;GO:0097159//organic cyclic compound binding;GO:0005488//binding;GO:1901363//heterocyclic compound binding	-
UNIGENE0000918	ID_491	21	PREDICTED: probable glycerophosphoryl diester phosphodiesterase 2 [Cucumis melo]	-	-	GO:0016787//hydrolase activity;GO:0008081//phosphoric diester hydrolase activity;GO:0042578//phosphoric ester hydrolase activity;GO:0003824//catalytic activity;GO:0016788//hydrolase activity, acting on ester bonds	GO:0044262//cellular carbohydrate metabolic process;GO:0071704//organic substance metabolic process;GO:0006066//alcohol metabolic process;GO:0044281//small molecule metabolic process;GO:1901615//organic hydroxy compound metabolic process;GO:0044699//single-organism process;GO:0044763//single-organism cellular process;GO:0019751//polyol metabolic process;GO:0008152//metabolic process;GO:0005975//c…
UNIGENE0000919	ID_492	12	--	-	-	-	-
UNIGENE0000920	ID_493	12	--	-	-	-	-
UNIGENE0000923	ID_494	2	--	-	-	-	-
UNIGENE0000924	ID_495	12	--	-	-	-	-
UNIGENE0000926	ID_496	19	hypothetical protein [Cucumis melo subsp. melo]	-	-	-	-
UNIGENE0000927	ID_497	7	BnaC04g23880D [Brassica napus]	-	-	-	-
UNIGENE0000930	ID_498	6	PREDICTED: transport inhibitor response 1-like protein [Cucumis sativus]	-	-	-	-
UNIGENE0000934	ID_499	15	Histone H4 [Triticum urartu]	-	GO:0032991//macromolecular complex;GO:0009536//plastid;GO:0043232//intracellular non-membrane-bounded organelle;GO:0044446//intracellular organelle part;GO:0043229//intracellular organelle;GO:0005911//cell-cell junction;GO:0044424//intracellular part;GO:0043228//non-membrane-bounded organelle;GO:0031090//organelle membrane;GO:0005737//cytoplasm;GO:0044464//cell part;GO:0005622//intracellular;GO:0…	GO:0003676//nucleic acid binding;GO:1901363//heterocyclic compound binding;GO:0097159//organic cyclic compound binding;GO:0005515//protein binding;GO:0005488//binding;GO:0046983//protein dimerization activity	GO:0034728//nucleosome organization;GO:0071822//protein complex subunit organization;GO:0006950//response to stress;GO:0051276//chromosome organization;GO:0071840//cellular component organization or biogenesis;GO:0006325//chromatin organization;GO:0050896//response to stimulus;GO:0071824//protein-DNA complex subunit organization;GO:0006996//organelle organization;GO:0009987//cellular process;GO:0…
UNIGENE0000935	ID_500	18	PREDICTED: photosynthetic NDH subunit of subcomplex B 2, chloroplastic [Cucumis sativus]	-	-	GO:0005488//binding	GO:0044238//primary metabolic process;GO:0008152//metabolic process
UNIGENE0000937	ID_501	12	PREDICTED: myosin-11 isoform X2 [Cucumis sativus]	-	GO:0005622//intracellular;GO:0016020//membrane;GO:0043228//non-membrane-bounded organelle;GO:0044425//membrane part;GO:0031224//intrinsic component of membrane;GO:0044464//cell part;GO:0043226//organelle;GO:0005623//cell;GO:0005856//cytoskeleton;GO:0015629//actin cytoskeleton;GO:0044424//intracellular part;GO:0043232//intracellular non-membrane-bounded organelle;GO:0043229//intracellular organelle	GO:0017111//nucleoside-triphosphatase activity;GO:0016817//hydrolase activity, acting on acid anhydrides;GO:0005515//protein binding;GO:0016462//pyrophosphatase activity;GO:0097367//carbohydrate derivative binding;GO:1901363//heterocyclic compound binding;GO:0032550//purine ribonucleoside binding;GO:0016818//hydrolase activity, acting on acid anhydrides, in phosphorus-containing anhydrides;GO:001…	GO:0050789//regulation of biological process;GO:0065007//biological regulation;GO:0050794//regulation of cellular process
UNIGENE0000940	ID_502	18	PREDICTED: cellulose synthase-like protein B4 [Cucumis sativus]	-	GO:0016020//membrane	GO:0003824//catalytic activity;GO:0016758//transferase activity, transferring hexosyl groups;GO:0046527//glucosyltransferase activity;GO:0016759//cellulose synthase activity;GO:0016740//transferase activity;GO:0016757//transferase activity, transferring glycosyl groups	GO:0071704//organic substance metabolic process;GO:0008152//metabolic process;GO:0044260//cellular macromolecule metabolic process;GO:0006073//cellular glucan metabolic process;GO:0044262//cellular carbohydrate metabolic process;GO:0005975//carbohydrate metabolic process;GO:0044264//cellular polysaccharide metabolic process;GO:0043170//macromolecule metabolic process;GO:0044237//cellular metaboli…
UNIGENE0000943	ID_503	19	--	-	-	-	-
UNIGENE0000944	ID_504	7	PREDICTED: rho-associated protein kinase 1 [Cucumis sativus]	-	-	-	-
UNIGENE0000946	ID_505	12	--	-	-	-	-
UNIGENE0000948	ID_506	12	--	-	-	-	-
UNIGENE0000952	ID_507	7	--	-	-	-	-
UNIGENE0000955	ID_508	11	--	-	-	-	-
UNIGENE0000958	ID_509	10	hypothetical protein POPTR_0018s03300g [Populus trichocarpa]	-	-	-	-
UNIGENE0000962	ID_510	12	--	-	-	-	-
UNIGENE0000963	ID_511	7	--	-	-	-	-
UNIGENE0000966	ID_512	12	--	-	-	-	-
UNIGENE0000969	ID_513	18	PREDICTED: probable calcium-binding protein CML30 [Cucumis melo]	ko04626//Plant-pathogen interaction//Environmental adaptation//Organismal Systems;ko04070//Phosphatidylinositol signaling system//Signal transduction//Environmental Information Processing	-	-	-
UNIGENE0000971	ID_514	0	PREDICTED: protein AF-9-like [Cucumis melo]	-	-	-	-
UNIGENE0000972	ID_515	17	PREDICTED: protein AF-9-like [Cucumis melo]	-	-	-	-
UNIGENE0000976	ID_516	7	--	-	-	-	-
UNIGENE0000978	ID_517	21	--	-	-	-	-
UNIGENE0000980	ID_518	9	--	-	-	-	-
UNIGENE0000981	ID_519	10	--	-	-	-	-
UNIGENE0000988	ID_520	17	PREDICTED: umecyanin-like [Cucumis sativus]	-	-	-	-
UNIGENE0000989	ID_521	12	--	-	-	-	-
UNIGENE0000991	ID_522	7	PREDICTED: putative endo-1,3(4)-beta-glucanase 2 [Cucumis sativus]	-	-	-	-
UNIGENE0000994	ID_523	14	PREDICTED: deoxyhypusine synthase isoform X2 [Cucumis melo]	-	-	GO:0003824//catalytic activity;GO:0016740//transferase activity;GO:0016765//transferase activity, transferring alkyl or aryl (other than methyl) groups	GO:0036211//protein modification process;GO:0044707//single-multicellular organism process;GO:0006575//cellular modified amino acid metabolic process;GO:0043170//macromolecule metabolic process;GO:0008152//metabolic process;GO:0006464//cellular protein modification process;GO:1901564//organonitrogen compound metabolic process;GO:0044238//primary metabolic process;GO:0007275//multicellular organis…
UNIGENE0000995	ID_524	12	PREDICTED: probable dolichyl-diphosphooligosaccharide--protein glycosyltransferase subunit 3B [Cucumis melo]	ko04141//Protein processing in endoplasmic reticulum//Folding, sorting and degradation//Genetic Information Processing;ko00510//N-Glycan biosynthesis//Glycan biosynthesis and metabolism//Metabolism	-	-	-
UNIGENE0000996	ID_525	10	PREDICTED: probable dolichyl-diphosphooligosaccharide--protein glycosyltransferase subunit 3B [Cucumis melo]	ko04141//Protein processing in endoplasmic reticulum//Folding, sorting and degradation//Genetic Information Processing;ko00510//N-Glycan biosynthesis//Glycan biosynthesis and metabolism//Metabolism	-	-	-
UNIGENE0000997	ID_526	7	--	-	-	-	-
UNIGENE0000999	ID_527	4	--	-	-	-	-
UNIGENE0001000	ID_528	7	--	-	-	-	-
UNIGENE0001001	ID_529	10	Os03g0197300 [Oryza sativa Japonica Group]	-	-	-	-
UNIGENE0001004	ID_530	17	PREDICTED: protein SENSITIVE TO PROTON RHIZOTOXICITY 1 [Cucumis sativus]	-	GO:0044424//intracellular part;GO:0005623//cell;GO:0043226//organelle;GO:0005622//intracellular;GO:0043231//intracellular membrane-bounded organelle;GO:0043229//intracellular organelle;GO:0043227//membrane-bounded organelle;GO:0044464//cell part	GO:0043167//ion binding;GO:0005488//binding;GO:0097159//organic cyclic compound binding;GO:0001071//nucleic acid binding transcription factor activity;GO:0043169//cation binding	GO:0043170//macromolecule metabolic process;GO:0071704//organic substance metabolic process;GO:0044260//cellular macromolecule metabolic process;GO:0060255//regulation of macromolecule metabolic process;GO:0009058//biosynthetic process;GO:0009987//cellular process;GO:0008152//metabolic process;GO:0010038//response to metal ion;GO:0065007//biological regulation;GO:0050789//regulation of biological…
UNIGENE0001005	ID_531	24	--	-	-	-	-
UNIGENE0001006	ID_532	12	--	-	-	-	-
UNIGENE0001011	ID_533	14	--	-	-	-	-
UNIGENE0001014	ID_534	21	PREDICTED: uncharacterized serine-rich protein C215.13-like [Cucumis melo]	-	-	-	-
UNIGENE0001022	ID_535	14	PREDICTED: 21 kDa protein-like [Cucumis sativus]	-	-	GO:0030234//enzyme regulator activity;GO:0098772//molecular function regulator;GO:0052689//carboxylic ester hydrolase activity;GO:0003824//catalytic activity;GO:0016788//hydrolase activity, acting on ester bonds;GO:0016787//hydrolase activity	GO:0050789//regulation of biological process;GO:0048519//negative regulation of biological process;GO:0019222//regulation of metabolic process;GO:0065007//biological regulation;GO:0009892//negative regulation of metabolic process
UNIGENE0001028	ID_536	7	--	-	-	-	-
UNIGENE0001029	ID_537	21	PREDICTED: pentatricopeptide repeat-containing protein At2g34400 [Cucumis sativus]	-	-	-	-
UNIGENE0001031	ID_538	12	--	-	-	-	-
UNIGENE0001032	ID_539	12	--	-	-	-	-
UNIGENE0001033	ID_540	9	PREDICTED: (S)-coclaurine N-methyltransferase [Cucumis sativus]	ko00950//Isoquinoline alkaloid biosynthesis//Biosynthesis of other secondary metabolites//Metabolism	-	GO:0016740//transferase activity;GO:0003824//catalytic activity;GO:0016741//transferase activity, transferring one-carbon groups	GO:0008152//metabolic process;GO:0071704//organic substance metabolic process;GO:0044699//single-organism process;GO:0044710//single-organism metabolic process;GO:0006629//lipid metabolic process;GO:0044238//primary metabolic process
UNIGENE0001040	ID_541	23	--	-	-	-	-
UNIGENE0001042	ID_542	7	--	-	-	-	-
UNIGENE0001049	ID_543	10	PREDICTED: uncharacterized protein LOC103497353 [Cucumis melo]	-	-	-	-
UNIGENE0001050	ID_544	20	PREDICTED: aureusidin synthase-like [Sesamum indicum]	ko00350//Tyrosine metabolism//Amino acid metabolism//Metabolism;ko00950//Isoquinoline alkaloid biosynthesis//Biosynthesis of other secondary metabolites//Metabolism	-	GO:0004097//catechol oxidase activity;GO:0003824//catalytic activity;GO:0016679//oxidoreductase activity, acting on diphenols and related substances as donors;GO:0016491//oxidoreductase activity;GO:0016682//oxidoreductase activity, acting on diphenols and related substances as donors, oxygen as acceptor	GO:0008152//metabolic process
UNIGENE0001052	ID_545	12	--	-	-	-	-
UNIGENE0001054	ID_546	6	--	-	-	-	-
UNIGENE0001055	ID_547	10	Os01g0116166 [Oryza sativa Japonica Group]	ko02010//ABC transporters//Membrane transport//Environmental Information Processing	GO:0005622//intracellular;GO:0043227//membrane-bounded organelle;GO:0043231//intracellular membrane-bounded organelle;GO:0043226//organelle;GO:0005623//cell;GO:0044464//cell part;GO:0044424//intracellular part;GO:0043229//intracellular organelle	GO:0005488//binding;GO:0043169//cation binding;GO:0046872//metal ion binding;GO:0043167//ion binding	GO:0044238//primary metabolic process;GO:0044237//cellular metabolic process;GO:0008152//metabolic process;GO:0071704//organic substance metabolic process;GO:0009987//cellular process
UNIGENE0001057	ID_548	6	Myb/SANT-like DNA-binding domain protein [Medicago truncatula]	-	-	-	-
UNIGENE0001058	ID_549	21	Protein kinase domain containing protein, expressed [Oryza sativa Japonica Group]	-	-	-	-
UNIGENE0001059	ID_550	1	transketolase [Cucumis sativus]	ko01200//Carbon metabolism//Global and Overview//Metabolism;ko01230//Biosynthesis of amino acids//Global and Overview//Metabolism;ko00710//Carbon fixation in photosynthetic organisms//Energy metabolism//Metabolism;ko00030//Pentose phosphate pathway//Carbohydrate metabolism//Metabolism	-	GO:0016740//transferase activity;GO:0003824//catalytic activity;GO:0016744//transferase activity, transferring aldehyde or ketonic groups	-
UNIGENE0001061	ID_551	8	PREDICTED: protein CHROMATIN REMODELING 25 [Cucumis sativus]	ko03440//Homologous recombination//Replication and repair//Genetic Information Processing	-	GO:0003824//catalytic activity;GO:0097367//carbohydrate derivative binding;GO:0097159//organic cyclic compound binding;GO:0032550//purine ribonucleoside binding;GO:0036094//small molecule binding;GO:1901363//heterocyclic compound binding;GO:0016787//hydrolase activity;GO:0032549//ribonucleoside binding;GO:0016817//hydrolase activity, acting on acid anhydrides;GO:0005488//binding;GO:0017111//nucle…	GO:0044699//single-organism process;GO:2001141//regulation of RNA biosynthetic process;GO:1903046//meiotic cell cycle process;GO:0060255//regulation of macromolecule metabolic process;GO:0003006//developmental process involved in reproduction;GO:0000725//recombinational repair;GO:0044237//cellular metabolic process;GO:0044238//primary metabolic process;GO:0006950//response to stress;GO:0009889//r…
UNIGENE0001062	ID_552	9	PREDICTED: ABC transporter G family member 26 [Cucumis melo]	-	GO:0031224//intrinsic component of membrane;GO:0044425//membrane part;GO:0016020//membrane	GO:0001883//purine nucleoside binding;GO:0016787//hydrolase activity;GO:1901363//heterocyclic compound binding;GO:0097159//organic cyclic compound binding;GO:0016818//hydrolase activity, acting on acid anhydrides, in phosphorus-containing anhydrides;GO:0001882//nucleoside binding;GO:0016817//hydrolase activity, acting on acid anhydrides;GO:0032550//purine ribonucleoside binding;GO:0097367//carboh…	GO:0032989//cellular component morphogenesis;GO:0010208//pollen wall assembly;GO:0044699//single-organism process;GO:0043062//extracellular structure organization;GO:0051179//localization;GO:0048856//anatomical structure development;GO:0044707//single-multicellular organism process;GO:0007275//multicellular organismal development;GO:0009555//pollen development;GO:0044767//single-organism developm…
UNIGENE0001065	ID_553	3	PREDICTED: uncharacterized serine-rich protein C215.13 [Prunus mume]	-	-	-	-
UNIGENE0001066	ID_554	6	--	-	-	-	-
UNIGENE0001069	ID_555	6	--	-	-	-	-
UNIGENE0001070	ID_556	17	PREDICTED: GDSL esterase/lipase At1g71691-like [Cucumis sativus]	-	-	GO:0016787//hydrolase activity;GO:0003824//catalytic activity	GO:0008152//metabolic process;GO:0044699//single-organism process;GO:0044238//primary metabolic process;GO:0006629//lipid metabolic process;GO:0044710//single-organism metabolic process;GO:0071704//organic substance metabolic process
UNIGENE0001073	ID_557	12	--	-	-	-	-
UNIGENE0001074	ID_558	7	NFU1 iron-sulfur cluster, mitochondrial [Gossypium arboreum]	-	-	-	GO:0050896//response to stimulus
UNIGENE0001075	ID_559	12	--	-	-	-	-
UNIGENE0001076	ID_560	2	--	-	-	-	-
UNIGENE0001079	ID_561	3	--	-	-	-	-
UNIGENE0001080	ID_562	14	--	-	-	-	-
UNIGENE0001081	ID_563	11	--	-	-	-	-
UNIGENE0001082	ID_564	6	--	-	-	-	-
UNIGENE0001085	ID_565	20	--	-	-	-	-
UNIGENE0001086	ID_566	12	--	-	-	-	-
UNIGENE0001090	ID_567	17	Protein TRANSPARENT TESTA 12 [Glycine soja]	-	GO:0031224//intrinsic component of membrane;GO:0016020//membrane;GO:0044425//membrane part	GO:0022804//active transmembrane transporter activity;GO:0005215//transporter activity;GO:0015291//secondary active transmembrane transporter activity;GO:0022857//transmembrane transporter activity	GO:0050896//response to stimulus;GO:0051234//establishment of localization;GO:0044699//single-organism process;GO:0015893//drug transport;GO:0042221//response to chemical;GO:0044765//single-organism transport;GO:0009987//cellular process;GO:1902578//single-organism localization;GO:0051179//localization;GO:0044763//single-organism cellular process;GO:0042493//response to drug;GO:0006810//transport
UNIGENE0001091	ID_568	6	--	-	-	-	-
UNIGENE0001092	ID_569	7	PREDICTED: clavaminate synthase-like protein At3g21360 [Cucumis sativus]	-	-	GO:0003824//catalytic activity	GO:0044710//single-organism metabolic process;GO:0044699//single-organism process;GO:0008152//metabolic process
UNIGENE0001094	ID_570	11	--	-	-	-	-
UNIGENE0001098	ID_571	18	PREDICTED: phosphatidylinositol 4-phosphate 5-kinase 10 isoform X3 [Cucumis sativus]	ko04144//Endocytosis//Transport and catabolism//Cellular Processes;ko00562//Inositol phosphate metabolism//Carbohydrate metabolism//Metabolism;ko04070//Phosphatidylinositol signaling system//Signal transduction//Environmental Information Processing	-	GO:0016307//phosphatidylinositol phosphate kinase activity;GO:0016773//phosphotransferase activity, alcohol group as acceptor;GO:0016740//transferase activity;GO:0016772//transferase activity, transferring phosphorus-containing groups;GO:1901363//heterocyclic compound binding;GO:0016301//kinase activity;GO:0036094//small molecule binding;GO:0005488//binding;GO:0097159//organic cyclic compound bin…	GO:0044710//single-organism metabolic process;GO:0006644//phospholipid metabolic process;GO:0044699//single-organism process;GO:0044763//single-organism cellular process;GO:0019637//organophosphate metabolic process;GO:0006650//glycerophospholipid metabolic process;GO:0008152//metabolic process;GO:0046486//glycerolipid metabolic process;GO:0006629//lipid metabolic process;GO:0044255//cellular lip…
UNIGENE0001099	ID_572	12	Geranylgeranyl pyrophosphate synthase 1 [Theobroma cacao]	ko00900//Terpenoid backbone biosynthesis//Metabolism of terpenoids and polyketides//Metabolism	-	GO:0016628//oxidoreductase activity, acting on the CH-CH group of donors, NAD or NADP as acceptor;GO:0003824//catalytic activity;GO:0016491//oxidoreductase activity;GO:0016627//oxidoreductase activity, acting on the CH-CH group of donors	GO:0044710//single-organism metabolic process;GO:0044763//single-organism cellular process;GO:0006629//lipid metabolic process;GO:0009987//cellular process;GO:0044255//cellular lipid metabolic process;GO:0008152//metabolic process;GO:0044238//primary metabolic process;GO:0006720//isoprenoid metabolic process;GO:0044237//cellular metabolic process;GO:0044699//single-organism process;GO:0071704//or…
UNIGENE0001100	ID_573	18	--	-	-	-	-
UNIGENE0001101	ID_574	3	--	-	-	-	-
UNIGENE0001102	ID_575	12	--	-	-	-	-
UNIGENE0001103	ID_576	10	PREDICTED: ethylene-responsive transcription factor ERF011-like [Cucumis sativus]	-	-	GO:0097159//organic cyclic compound binding;GO:0005488//binding;GO:1901363//heterocyclic compound binding;GO:0001071//nucleic acid binding transcription factor activity;GO:0003676//nucleic acid binding	GO:0044237//cellular metabolic process;GO:0043170//macromolecule metabolic process;GO:0044249//cellular biosynthetic process;GO:0060255//regulation of macromolecule metabolic process;GO:0019222//regulation of metabolic process;GO:0065007//biological regulation;GO:0010468//regulation of gene expression;GO:0008152//metabolic process;GO:1901576//organic substance biosynthetic process;GO:0034645//cel…
UNIGENE0001104	ID_577	9	--	-	-	-	-
UNIGENE0001108	ID_578	10	--	-	-	-	-
UNIGENE0001109	ID_579	5	PREDICTED: dirigent protein 15-like [Cucumis melo]	-	-	-	-
UNIGENE0001110	ID_580	9	PREDICTED: 4-coumarate--CoA ligase-like 10 [Cucumis melo]	-	-	GO:0016877//ligase activity, forming carbon-sulfur bonds;GO:0016405//CoA-ligase activity;GO:0003824//catalytic activity;GO:0016874//ligase activity	-
UNIGENE0001113	ID_581	4	--	-	-	-	-
UNIGENE0001117	ID_582	24	PREDICTED: indole-3-acetic acid-induced protein ARG7-like [Cucumis sativus]	ko04075//Plant hormone signal transduction//Signal transduction//Environmental Information Processing	-	-	-
UNIGENE0001119	ID_583	12	--	-	-	-	-
UNIGENE0001120	ID_584	20	RNA-directed DNA polymerase , related [Medicago truncatula]	-	-	-	-
UNIGENE0001121	ID_585	10	--	-	-	-	-
UNIGENE0001123	ID_586	7	--	-	-	-	-
UNIGENE0001126	ID_587	9	PREDICTED: ABC transporter G family member 28-like, partial [Nelumbo nucifera]	-	GO:0031224//intrinsic component of membrane;GO:0016020//membrane;GO:0044425//membrane part	GO:0016820//hydrolase activity, acting on acid anhydrides, catalyzing transmembrane movement of substances;GO:0015405//P-P-bond-hydrolysis-driven transmembrane transporter activity;GO:0005488//binding;GO:1901363//heterocyclic compound binding;GO:0001883//purine nucleoside binding;GO:0003824//catalytic activity;GO:0017111//nucleoside-triphosphatase activity;GO:0097367//carbohydrate derivative bind…	GO:0051179//localization;GO:0044699//single-organism process;GO:0015893//drug transport;GO:0051234//establishment of localization;GO:0042221//response to chemical;GO:0044765//single-organism transport;GO:0006810//transport;GO:1902578//single-organism localization;GO:0042493//response to drug;GO:0050896//response to stimulus
UNIGENE0001132	ID_588	7	PREDICTED: MLP-like protein 328 [Cucumis melo]	-	-	-	GO:0050896//response to stimulus
UNIGENE0001134	ID_589	10	PREDICTED: LOW QUALITY PROTEIN: disease resistance protein At4g27190-like [Cucumis sativus]	-	-	-	-
UNIGENE0001135	ID_590	1	PREDICTED: LRR receptor-like serine/threonine-protein kinase FLS2 [Cucumis melo]	-	-	-	-
UNIGENE0001139	ID_591	3	PREDICTED: CASP-like protein 5 [Cucumis melo]	-	GO:0016020//membrane	-	-
UNIGENE0001141	ID_592	12	PREDICTED: cytochrome P450 78A5 [Cucumis sativus]	ko00945//Stilbenoid, diarylheptanoid and gingerol biosynthesis//Biosynthesis of other secondary metabolites//Metabolism;ko00903//Limonene and pinene degradation//Metabolism of terpenoids and polyketides//Metabolism	GO:0044424//intracellular part;GO:0044464//cell part;GO:0043231//intracellular membrane-bounded organelle;GO:0031224//intrinsic component of membrane;GO:0043226//organelle;GO:0005623//cell;GO:0016020//membrane;GO:0043227//membrane-bounded organelle;GO:0005622//intracellular;GO:0044425//membrane part;GO:0043229//intracellular organelle	GO:0004497//monooxygenase activity;GO:0016705//oxidoreductase activity, acting on paired donors, with incorporation or reduction of molecular oxygen;GO:0097159//organic cyclic compound binding;GO:0046906//tetrapyrrole binding;GO:0003824//catalytic activity;GO:0016709//oxidoreductase activity, acting on paired donors, with incorporation or reduction of molecular oxygen, NAD(P)H as one donor, and i…	GO:0048646//anatomical structure formation involved in morphogenesis;GO:0009887//organ morphogenesis;GO:0045927//positive regulation of growth;GO:0044767//single-organism developmental process;GO:0044699//single-organism process;GO:0032501//multicellular organismal process;GO:0050789//regulation of biological process;GO:0065007//biological regulation;GO:0044707//single-multicellular organism proc…
UNIGENE0001142	ID_593	0	--	-	-	-	-
UNIGENE0001143	ID_594	15	hypothetical protein CISIN_1g033549mg [Citrus sinensis]	ko03010//Ribosome//Translation//Genetic Information Processing	-	-	-
UNIGENE0001145	ID_595	12	--	-	-	-	-
UNIGENE0001147	ID_596	12	--	-	-	-	-
UNIGENE0001149	ID_597	6	hypothetical protein VITISV_029474 [Vitis vinifera]	-	-	-	-
UNIGENE0001150	ID_598	21	--	-	-	-	-
UNIGENE0001152	ID_599	12	--	-	-	-	-
UNIGENE0001154	ID_600	24	--	-	-	-	-
UNIGENE0001155	ID_601	7	--	-	-	-	-
UNIGENE0001156	ID_602	8	PREDICTED: 54S ribosomal protein L19, mitochondrial [Cucumis melo]	ko03010//Ribosome//Translation//Genetic Information Processing	GO:0044464//cell part;GO:0005623//cell;GO:0032991//macromolecular complex;GO:0005622//intracellular;GO:0030529//ribonucleoprotein complex;GO:0044424//intracellular part	GO:0005198//structural molecule activity	GO:0071702//organic substance transport;GO:0070727//cellular macromolecule localization;GO:0006725//cellular aromatic compound metabolic process;GO:0016070//RNA metabolic process;GO:0044249//cellular biosynthetic process;GO:0015031//protein transport;GO:0008152//metabolic process;GO:0033036//macromolecule localization;GO:0008104//protein localization;GO:0006139//nucleobase-containing compound met…
UNIGENE0001160	ID_603	23	Ankyrin repeat-containing protein [Morus notabilis]	-	-	-	-
UNIGENE0001161	ID_604	12	--	-	-	-	-
UNIGENE0001163	ID_605	7	PREDICTED: ARGOS-like protein [Cucumis melo]	-	-	-	-
UNIGENE0001168	ID_606	0	--	-	-	-	-
UNIGENE0001169	ID_607	12	--	-	-	-	-
UNIGENE0001170	ID_608	10	--	-	-	-	-
UNIGENE0001172	ID_609	9	--	-	-	-	-
UNIGENE0001173	ID_610	11	PREDICTED: phospholipid-transporting ATPase 10-like [Brassica rapa]	-	-	-	-
UNIGENE0001177	ID_611	20	PLATZ transcription factor family protein isoform 1 [Theobroma cacao]	-	-	-	-
UNIGENE0001179	ID_612	2	BnaC08g13650D, partial [Brassica napus]	-	GO:0005623//cell;GO:0043231//intracellular membrane-bounded organelle;GO:0005622//intracellular;GO:0043227//membrane-bounded organelle;GO:0044424//intracellular part;GO:0044464//cell part;GO:0043229//intracellular organelle;GO:0043226//organelle	GO:0043167//ion binding;GO:0005488//binding;GO:0070011//peptidase activity, acting on L-amino acid peptides;GO:0004175//endopeptidase activity;GO:0043169//cation binding;GO:0043168//anion binding;GO:0016787//hydrolase activity;GO:0046914//transition metal ion binding;GO:0097159//organic cyclic compound binding;GO:0003824//catalytic activity;GO:0008233//peptidase activity;GO:0046872//metal ion bin…	GO:0044260//cellular macromolecule metabolic process;GO:1901360//organic cyclic compound metabolic process;GO:0009987//cellular process;GO:0006082//organic acid metabolic process;GO:0044281//small molecule metabolic process;GO:0090304//nucleic acid metabolic process;GO:0019752//carboxylic acid metabolic process;GO:0046483//heterocycle metabolic process;GO:0043170//macromolecule metabolic process;…
UNIGENE0001185	ID_613	21	--	-	-	-	-
UNIGENE0001187	ID_614	1	--	-	-	-	-
UNIGENE0001189	ID_615	12	--	-	-	-	-
UNIGENE0001194	ID_616	4	Gag protease polyprotein [Theobroma cacao]	-	-	-	-
UNIGENE0001200	ID_617	11	--	-	-	-	-
UNIGENE0001202	ID_618	12	--	-	-	-	-
UNIGENE0001203	ID_619	6	--	-	-	-	-
UNIGENE0001204	ID_620	12	PREDICTED: plant intracellular Ras-group-related LRR protein 6-like [Cucumis sativus]	-	-	GO:0003824//catalytic activity;GO:0016787//hydrolase activity;GO:0016788//hydrolase activity, acting on ester bonds;GO:0042578//phosphoric ester hydrolase activity;GO:0016791//phosphatase activity	GO:0044237//cellular metabolic process;GO:0009987//cellular process;GO:0006793//phosphorus metabolic process;GO:0006796//phosphate-containing compound metabolic process;GO:0008152//metabolic process
UNIGENE0001208	ID_621	15	PREDICTED: acetyltransferase At1g77540 isoform X2 [Cucumis sativus]	-	-	GO:0003824//catalytic activity;GO:0016740//transferase activity	-
UNIGENE0001209	ID_622	20	PREDICTED: desumoylating isopeptidase 1 [Cucumis sativus]	-	GO:0005623//cell;GO:0044464//cell part;GO:0044424//intracellular part;GO:0005622//intracellular	GO:0016787//hydrolase activity;GO:0003824//catalytic activity	-
UNIGENE0001210	ID_623	21	PREDICTED: desumoylating isopeptidase 1 [Cucumis sativus]	-	GO:0043231//intracellular membrane-bounded organelle;GO:0044424//intracellular part;GO:0044464//cell part;GO:0005622//intracellular;GO:0043227//membrane-bounded organelle;GO:0043226//organelle;GO:0005623//cell;GO:0043229//intracellular organelle	GO:0003824//catalytic activity;GO:0016798//hydrolase activity, acting on glycosyl bonds;GO:0016787//hydrolase activity;GO:0004553//hydrolase activity, hydrolyzing O-glycosyl compounds	-
UNIGENE0001211	ID_624	16	--	-	-	-	-
UNIGENE0001212	ID_625	12	--	-	-	-	-
UNIGENE0001213	ID_626	12	--	-	-	-	-
UNIGENE0001216	ID_627	18	PREDICTED: plastidic ATP/ADP-transporter-like [Cucumis melo]	-	GO:0044435//plastid part;GO:0044444//cytoplasmic part;GO:0009536//plastid;GO:0031090//organelle membrane;GO:0043227//membrane-bounded organelle;GO:0043229//intracellular organelle;GO:0044464//cell part;GO:0042170//plastid membrane;GO:0031975//envelope;GO:0031967//organelle envelope;GO:0044446//intracellular organelle part;GO:0043231//intracellular membrane-bounded organelle;GO:0009526//plastid en…	GO:0005215//transporter activity;GO:0015932//nucleobase-containing compound transmembrane transporter activity;GO:0015215//nucleotide transmembrane transporter activity;GO:0015211//purine nucleoside transmembrane transporter activity;GO:0022892//substrate-specific transporter activity;GO:0005337//nucleoside transmembrane transporter activity;GO:0022857//transmembrane transporter activity;GO:00360…	GO:1902578//single-organism localization;GO:0015711//organic anion transport;GO:0044765//single-organism transport;GO:0071702//organic substance transport;GO:0044699//single-organism process;GO:0006820//anion transport;GO:0006810//transport;GO:0051179//localization;GO:0006811//ion transport;GO:0051234//establishment of localization
UNIGENE0001218	ID_628	10	--	-	-	-	-
UNIGENE0001221	ID_629	16	PREDICTED: GDSL esterase/lipase At1g09390 [Cucumis melo]	-	GO:0044422//organelle part;GO:0009536//plastid;GO:0044435//plastid part;GO:0044444//cytoplasmic part;GO:0005737//cytoplasm;GO:0043226//organelle;GO:0044424//intracellular part;GO:0005623//cell;GO:0043229//intracellular organelle;GO:0044446//intracellular organelle part;GO:0043231//intracellular membrane-bounded organelle;GO:0043227//membrane-bounded organelle;GO:0044464//cell part;GO:0009532//pla…	GO:0016788//hydrolase activity, acting on ester bonds;GO:0016787//hydrolase activity;GO:0003824//catalytic activity	GO:0044238//primary metabolic process;GO:0006629//lipid metabolic process;GO:0071704//organic substance metabolic process;GO:0044699//single-organism process;GO:0044710//single-organism metabolic process;GO:0008152//metabolic process
UNIGENE0001222	ID_630	6	--	-	-	-	-
UNIGENE0001225	ID_631	12	--	-	-	-	-
UNIGENE0001228	ID_632	10	--	-	-	-	-
UNIGENE0001230	ID_633	21	60S ribosomal protein L9e [Galdieria sulphuraria]	ko03010//Ribosome//Translation//Genetic Information Processing	GO:0032991//macromolecular complex;GO:0016020//membrane;GO:0044424//intracellular part;GO:0005623//cell;GO:0030529//ribonucleoprotein complex;GO:0044464//cell part;GO:0005622//intracellular	GO:0003676//nucleic acid binding;GO:0003723//RNA binding;GO:0005198//structural molecule activity;GO:0097159//organic cyclic compound binding;GO:0005488//binding;GO:1901363//heterocyclic compound binding	GO:0071704//organic substance metabolic process;GO:0008152//metabolic process;GO:0010467//gene expression;GO:0009987//cellular process;GO:0043170//macromolecule metabolic process
UNIGENE0001231	ID_634	0	--	-	-	-	-
UNIGENE0001232	ID_635	12	--	-	-	-	-
UNIGENE0001234	ID_636	21	PreproMP73 [Cucumis sativus]	-	-	-	-
UNIGENE0001237	ID_637	12	--	-	-	-	-
UNIGENE0001238	ID_638	12	--	-	-	-	-
UNIGENE0001239	ID_639	9	--	-	-	-	-
UNIGENE0001241	ID_640	14	PREDICTED: condensin complex subunit 1 [Cucumis sativus]	-	GO:0043227//membrane-bounded organelle;GO:0044424//intracellular part;GO:0005623//cell;GO:0043231//intracellular membrane-bounded organelle;GO:0044464//cell part;GO:0043229//intracellular organelle;GO:0005622//intracellular;GO:0043226//organelle	-	GO:0022402//cell cycle process;GO:0051276//chromosome organization;GO:0007049//cell cycle;GO:0016043//cellular component organization;GO:0044763//single-organism cellular process;GO:0044699//single-organism process;GO:0000280//nuclear division;GO:0006996//organelle organization;GO:0048285//organelle fission;GO:0071840//cellular component organization or biogenesis;GO:0009987//cellular process
UNIGENE0001244	ID_641	7	PREDICTED: chromo domain-containing protein cec-1 [Fragaria vesca subsp. vesca]	-	-	-	-
UNIGENE0001245	ID_642	5	PREDICTED: chromo domain-containing protein cec-1 [Fragaria vesca subsp. vesca]	-	-	-	-
UNIGENE0001248	ID_643	10	--	-	-	-	-
UNIGENE0001252	ID_644	10	--	-	-	-	-
UNIGENE0001256	ID_645	12	MuDRA-like transposase [Cucumis melo]	-	-	-	-
UNIGENE0001258	ID_646	7	DUF679 domain membrane protein 2 [Theobroma cacao]	-	GO:0098588//bounding membrane of organelle;GO:0044424//intracellular part;GO:0044464//cell part;GO:0043231//intracellular membrane-bounded organelle;GO:0043226//organelle;GO:0005622//intracellular;GO:0005774//vacuolar membrane;GO:0016020//membrane;GO:0005623//cell;GO:0044444//cytoplasmic part;GO:0031090//organelle membrane;GO:0044422//organelle part;GO:0044437//vacuolar part;GO:0043229//intracell…	-	-
UNIGENE0001259	ID_647	3	--	-	-	-	-
UNIGENE0001260	ID_648	12	Zinc finger, CCHC-type-like protein [Theobroma cacao]	-	-	GO:0005488//binding	-
UNIGENE0001261	ID_649	5	--	-	-	-	-
UNIGENE0001262	ID_650	12	--	-	-	-	-
UNIGENE0001263	ID_651	18	PREDICTED: probable WRKY transcription factor 40 [Cucumis melo]	-	-	GO:0003677//DNA binding;GO:1901363//heterocyclic compound binding;GO:0001071//nucleic acid binding transcription factor activity;GO:0097159//organic cyclic compound binding;GO:0003676//nucleic acid binding;GO:0005488//binding	GO:0031347//regulation of defense response;GO:0044699//single-organism process;GO:0051716//cellular response to stimulus;GO:0044700//single organism signaling;GO:0070887//cellular response to chemical stimulus;GO:0050794//regulation of cellular process;GO:0044710//single-organism metabolic process;GO:0044763//single-organism cellular process;GO:0008152//metabolic process;GO:0007165//signal transd…
UNIGENE0001264	ID_652	14	--	-	-	-	-
UNIGENE0001265	ID_653	12	--	-	-	-	-
UNIGENE0001268	ID_654	10	Os07g0501200 [Oryza sativa Japonica Group]	-	-	-	-
UNIGENE0001269	ID_655	10	BnaC06g05480D [Brassica napus]	-	-	-	-
UNIGENE0001270	ID_656	12	hypothetical protein Csa_7G004025 [Cucumis sativus]	-	-	-	-
UNIGENE0001272	ID_657	15	PREDICTED: cytochrome P450 705A5-like [Cucumis melo]	-	-	GO:0043167//ion binding;GO:0046914//transition metal ion binding;GO:0046872//metal ion binding;GO:0097159//organic cyclic compound binding;GO:0043169//cation binding;GO:0003824//catalytic activity;GO:1901363//heterocyclic compound binding;GO:0046906//tetrapyrrole binding;GO:0016491//oxidoreductase activity;GO:0005488//binding	GO:0044699//single-organism process;GO:0044710//single-organism metabolic process;GO:0008152//metabolic process
UNIGENE0001273	ID_658	12	--	-	-	-	-
UNIGENE0001274	ID_659	12	--	-	-	-	-
UNIGENE0001275	ID_660	12	--	-	-	-	-
UNIGENE0001276	ID_661	2	PREDICTED: extended synaptotagmin-1 [Cucumis melo]	-	GO:0071944//cell periphery;GO:0016020//membrane;GO:0005911//cell-cell junction;GO:0043231//intracellular membrane-bounded organelle;GO:0043229//intracellular organelle;GO:0030312//external encapsulating structure;GO:0043227//membrane-bounded organelle;GO:0044425//membrane part;GO:0005623//cell;GO:0005622//intracellular;GO:0031224//intrinsic component of membrane;GO:0044464//cell part;GO:0044424//…	GO:0016829//lyase activity;GO:0016831//carboxy-lyase activity;GO:0016830//carbon-carbon lyase activity;GO:0003824//catalytic activity	-
UNIGENE0001278	ID_662	10	--	-	-	-	-
UNIGENE0001283	ID_663	11	--	-	-	-	-
UNIGENE0001284	ID_664	12	PREDICTED: disease resistance protein RGA2-like [Elaeis guineensis]	-	GO:0043227//membrane-bounded organelle;GO:0043229//intracellular organelle;GO:0044464//cell part;GO:0005623//cell;GO:0005622//intracellular;GO:0044424//intracellular part;GO:0043226//organelle;GO:0043231//intracellular membrane-bounded organelle	GO:0001882//nucleoside binding;GO:0032549//ribonucleoside binding;GO:0036094//small molecule binding;GO:1901363//heterocyclic compound binding;GO:0032550//purine ribonucleoside binding;GO:0005488//binding;GO:0097159//organic cyclic compound binding;GO:0097367//carbohydrate derivative binding;GO:0001883//purine nucleoside binding	-
UNIGENE0001286	ID_665	9	PREDICTED: mitotic apparatus protein p62-like [Glycine max]	-	-	-	-
UNIGENE0001287	ID_666	12	protein SELF-PRUNING-like [Cucumis sativus]	-	-	-	-
UNIGENE0001288	ID_667	24	glutamine amidotransferase [Gossypium arboreum]	-	-	GO:0003824//catalytic activity	GO:0006082//organic acid metabolic process;GO:0044763//single-organism cellular process;GO:0043436//oxoacid metabolic process;GO:0044699//single-organism process;GO:0044237//cellular metabolic process;GO:0009064//glutamine family amino acid metabolic process;GO:0044281//small molecule metabolic process;GO:0044238//primary metabolic process;GO:0008152//metabolic process;GO:0006807//nitrogen compou…
UNIGENE0001289	ID_668	8	glutamine amidotransferase [Gossypium arboreum]	-	-	GO:0003824//catalytic activity	GO:0044763//single-organism cellular process;GO:0043436//oxoacid metabolic process;GO:0006082//organic acid metabolic process;GO:0044710//single-organism metabolic process;GO:0019752//carboxylic acid metabolic process;GO:0044281//small molecule metabolic process;GO:0044699//single-organism process;GO:0044238//primary metabolic process;GO:0009987//cellular process;GO:1901605//alpha-amino acid meta…
UNIGENE0001290	ID_669	12	--	-	-	-	-
UNIGENE0001291	ID_670	10	--	-	-	-	-
UNIGENE0001293	ID_671	12	hypothetical protein M569_00079, partial [Genlisea aurea]	-	-	-	-
UNIGENE0001294	ID_672	7	--	-	-	-	-
UNIGENE0001296	ID_673	12	--	-	-	-	-
UNIGENE0001300	ID_674	3	PREDICTED: LOB domain-containing protein 41 [Cucumis sativus]	-	-	-	-
UNIGENE0001303	ID_675	12	--	-	-	-	-
UNIGENE0001305	ID_676	7	--	-	-	-	-
UNIGENE0001306	ID_677	7	--	-	-	-	-
UNIGENE0001309	ID_678	5	--	-	-	-	-
UNIGENE0001310	ID_679	6	--	-	-	-	-
UNIGENE0001311	ID_680	12	--	-	-	-	-
UNIGENE0001313	ID_681	18	--	-	-	-	-
UNIGENE0001315	ID_682	12	PREDICTED: superkiller viralicidic activity 2-like 2 [Nicotiana tomentosiformis]	-	-	-	-
UNIGENE0001318	ID_683	0	Electron transfer flavoprotein-ubiquinone oxidoreductase [Morus notabilis]	-	-	-	-
UNIGENE0001319	ID_684	0	--	-	-	-	-
UNIGENE0001320	ID_685	12	--	-	-	-	-
UNIGENE0001322	ID_686	11	Nitrate reductase 2 [Theobroma cacao]	ko00910//Nitrogen metabolism//Energy metabolism//Metabolism	-	GO:0043167//ion binding;GO:0016491//oxidoreductase activity;GO:0036094//small molecule binding;GO:0000166//nucleotide binding;GO:0043169//cation binding;GO:0050662//coenzyme binding;GO:0046914//transition metal ion binding;GO:0046906//tetrapyrrole binding;GO:0016661//oxidoreductase activity, acting on other nitrogenous compounds as donors;GO:0003824//catalytic activity;GO:0097159//organic cyclic …	GO:0044763//single-organism cellular process;GO:0044710//single-organism metabolic process;GO:0044699//single-organism process;GO:2001057//reactive nitrogen species metabolic process;GO:0006082//organic acid metabolic process;GO:0009987//cellular process;GO:0008152//metabolic process;GO:0071704//organic substance metabolic process;GO:0044281//small molecule metabolic process;GO:0043436//oxoacid m…
UNIGENE0001323	ID_687	12	--	-	-	-	-
UNIGENE0001324	ID_688	12	--	-	-	-	-
UNIGENE0001325	ID_689	12	--	-	-	-	-
UNIGENE0001326	ID_690	11	PREDICTED: wall-associated receptor kinase 3-like, partial [Cucumis melo]	-	-	GO:0016301//kinase activity;GO:0016772//transferase activity, transferring phosphorus-containing groups;GO:0001882//nucleoside binding;GO:0016740//transferase activity;GO:0036094//small molecule binding;GO:0097159//organic cyclic compound binding;GO:1901363//heterocyclic compound binding;GO:0043167//ion binding;GO:0001883//purine nucleoside binding;GO:0043169//cation binding;GO:0016773//phosphotr…	GO:0006464//cellular protein modification process;GO:0008152//metabolic process;GO:0044238//primary metabolic process;GO:0043170//macromolecule metabolic process;GO:0006796//phosphate-containing compound metabolic process;GO:0044267//cellular protein metabolic process;GO:0009987//cellular process;GO:0044260//cellular macromolecule metabolic process;GO:0019538//protein metabolic process;GO:0044237…
UNIGENE0001329	ID_691	21	triacylglycerol lipase 1 [Arachis hypogaea]	-	-	GO:0016787//hydrolase activity;GO:0016788//hydrolase activity, acting on ester bonds;GO:0003824//catalytic activity;GO:0016298//lipase activity	GO:0008152//metabolic process;GO:0044238//primary metabolic process
UNIGENE0001334	ID_692	4	PREDICTED: protein TORNADO 2-like [Cucumis melo]	-	GO:0030054//cell junction;GO:0016020//membrane;GO:0005911//cell-cell junction;GO:0031224//intrinsic component of membrane;GO:0044425//membrane part	-	GO:0044238//primary metabolic process;GO:0007389//pattern specification process;GO:0065007//biological regulation;GO:0009943//adaxial/abaxial axis specification;GO:2000026//regulation of multicellular organismal development;GO:0044700//single organism signaling;GO:0048513//organ development;GO:0051234//establishment of localization;GO:0009798//axis specification;GO:0010033//response to organic su…
UNIGENE0001337	ID_693	5	PREDICTED: probable metal-nicotianamine transporter YSL7 [Cucumis sativus]	-	-	-	GO:0044763//single-organism cellular process;GO:0009987//cellular process;GO:0044699//single-organism process
UNIGENE0001338	ID_694	16	--	-	-	-	-
UNIGENE0001341	ID_695	12	--	-	-	-	-
UNIGENE0001343	ID_696	12	--	-	-	-	-
UNIGENE0001346	ID_697	11	PREDICTED: protein TRANSPARENT TESTA 12 [Cucumis sativus]	-	GO:0031224//intrinsic component of membrane;GO:0044425//membrane part;GO:0016020//membrane	GO:0005215//transporter activity;GO:0015291//secondary active transmembrane transporter activity;GO:0022857//transmembrane transporter activity;GO:0022804//active transmembrane transporter activity	GO:0042493//response to drug;GO:0051179//localization;GO:0015893//drug transport;GO:0044763//single-organism cellular process;GO:0051234//establishment of localization;GO:0044765//single-organism transport;GO:1902578//single-organism localization;GO:0042221//response to chemical;GO:0044699//single-organism process;GO:0009987//cellular process;GO:0006810//transport;GO:0050896//response to stimulus
UNIGENE0001347	ID_698	24	LRR receptor-like serine/threonine-protein kinase FLS2 [Aegilops tauschii]	-	-	-	-
UNIGENE0001349	ID_699	7	Outward-rectifying potassium channel 4 -like protein [Gossypium arboreum]	-	-	-	-
UNIGENE0001351	ID_700	7	--	-	-	-	-
UNIGENE0001352	ID_701	9	--	-	-	-	-
UNIGENE0001353	ID_702	13	copia-like retrotransposon Hopscotch polyprotein [Zea mays]	-	-	-	-
UNIGENE0001355	ID_703	12	--	-	-	-	-
UNIGENE0001357	ID_704	12	--	-	-	-	-
UNIGENE0001358	ID_705	3	--	-	-	-	-
UNIGENE0001361	ID_706	12	--	-	-	-	-
UNIGENE0001362	ID_707	20	--	-	-	-	-
UNIGENE0001366	ID_708	12	--	-	-	-	-
UNIGENE0001369	ID_709	12	--	-	-	-	-
UNIGENE0001370	ID_710	12	--	-	-	-	-
UNIGENE0001371	ID_711	18	tRNA-splicing ligase RtcB [Gossypium arboreum]	-	GO:0043227//membrane-bounded organelle;GO:0043231//intracellular membrane-bounded organelle;GO:0031984//organelle subcompartment;GO:0043226//organelle;GO:0044446//intracellular organelle part;GO:0044424//intracellular part;GO:0005622//intracellular;GO:0044464//cell part;GO:0043229//intracellular organelle;GO:0044422//organelle part;GO:0005623//cell	GO:0016740//transferase activity;GO:0003824//catalytic activity	-
UNIGENE0001372	ID_712	19	Leucine-rich receptor-like protein kinase family protein [Theobroma cacao]	-	GO:0016020//membrane	GO:0016773//phosphotransferase activity, alcohol group as acceptor;GO:0032549//ribonucleoside binding;GO:0036094//small molecule binding;GO:0001883//purine nucleoside binding;GO:0001882//nucleoside binding;GO:1901363//heterocyclic compound binding;GO:0032550//purine ribonucleoside binding;GO:0016740//transferase activity;GO:0005488//binding;GO:0016772//transferase activity, transferring phosphoru…	GO:0006464//cellular protein modification process;GO:0044267//cellular protein metabolic process;GO:0044238//primary metabolic process;GO:0019538//protein metabolic process;GO:0009987//cellular process;GO:0043170//macromolecule metabolic process;GO:0043412//macromolecule modification;GO:0044260//cellular macromolecule metabolic process;GO:0044237//cellular metabolic process;GO:0036211//protein mo…
UNIGENE0001374	ID_713	21	PREDICTED: calcium-binding allergen Bet v 3 [Cucumis melo]	ko04626//Plant-pathogen interaction//Environmental adaptation//Organismal Systems	-	GO:0005488//binding;GO:0043167//ion binding;GO:0043169//cation binding;GO:0046872//metal ion binding	GO:0016043//cellular component organization;GO:0048856//anatomical structure development;GO:0044763//single-organism cellular process;GO:0032502//developmental process;GO:0009653//anatomical structure morphogenesis;GO:0048869//cellular developmental process;GO:0044699//single-organism process;GO:0030154//cell differentiation;GO:0071840//cellular component organization or biogenesis;GO:0009987//ce…
UNIGENE0001375	ID_714	4	--	-	-	-	-
UNIGENE0001377	ID_715	11	retrotransposon protein, putative, unclassified [Oryza sativa Japonica Group]	-	-	GO:0005488//binding	-
UNIGENE0001378	ID_716	4	OSJNBa0061G20.16 [Oryza sativa Japonica Group]	-	-	GO:0005488//binding	-
UNIGENE0001379	ID_717	12	OSJNBb0016D16.10 [Oryza sativa Japonica Group]	-	GO:0005622//intracellular;GO:0043227//membrane-bounded organelle;GO:0043229//intracellular organelle;GO:0044424//intracellular part;GO:0043226//organelle;GO:0043231//intracellular membrane-bounded organelle;GO:0005623//cell;GO:0044464//cell part	GO:1901363//heterocyclic compound binding;GO:0003676//nucleic acid binding;GO:0097159//organic cyclic compound binding;GO:0005488//binding	GO:0006807//nitrogen compound metabolic process;GO:0044238//primary metabolic process;GO:0044260//cellular macromolecule metabolic process;GO:0006725//cellular aromatic compound metabolic process;GO:0006139//nucleobase-containing compound metabolic process;GO:0090304//nucleic acid metabolic process;GO:0044237//cellular metabolic process;GO:0043170//macromolecule metabolic process;GO:0071704//orga…
UNIGENE0001380	ID_718	4	--	-	-	-	-
UNIGENE0001381	ID_719	23	PREDICTED: abscisic acid receptor PYL4-like [Cucumis melo]	ko04075//Plant hormone signal transduction//Signal transduction//Environmental Information Processing	GO:0005622//intracellular;GO:0043227//membrane-bounded organelle;GO:0043231//intracellular membrane-bounded organelle;GO:0044424//intracellular part;GO:0043226//organelle;GO:0043229//intracellular organelle;GO:0005623//cell;GO:0044464//cell part	GO:0060089//molecular transducer activity;GO:0005515//protein binding;GO:0008289//lipid binding;GO:0019840//isoprenoid binding;GO:0005488//binding;GO:0046983//protein dimerization activity	GO:0044763//single-organism cellular process;GO:0009755//hormone-mediated signaling pathway;GO:0009725//response to hormone;GO:0009987//cellular process;GO:0010033//response to organic substance;GO:0009719//response to endogenous stimulus;GO:0065007//biological regulation;GO:0050794//regulation of cellular process;GO:0051716//cellular response to stimulus;GO:0071495//cellular response to endogeno…
UNIGENE0001383	ID_720	10	PREDICTED: protein WALLS ARE THIN 1 [Cucumis sativus]	-	GO:0005622//intracellular;GO:0044464//cell part;GO:0098588//bounding membrane of organelle;GO:0005773//vacuole;GO:0005737//cytoplasm;GO:0044424//intracellular part;GO:0031224//intrinsic component of membrane;GO:0043227//membrane-bounded organelle;GO:0044444//cytoplasmic part;GO:0044437//vacuolar part;GO:0043231//intracellular membrane-bounded organelle;GO:0043226//organelle;GO:0043229//intracellu…	GO:0005215//transporter activity	GO:0060918//auxin transport;GO:0043436//oxoacid metabolic process;GO:0071310//cellular response to organic substance;GO:0009416//response to light stimulus;GO:0009314//response to radiation;GO:0071495//cellular response to endogenous stimulus;GO:0032501//multicellular organismal process;GO:0016049//cell growth;GO:0009308//amine metabolic process;GO:0051239//regulation of multicellular organismal …
UNIGENE0001384	ID_721	1	PREDICTED: protein WALLS ARE THIN 1 [Cucumis melo]	-	GO:0043226//organelle;GO:0044437//vacuolar part;GO:0016020//membrane;GO:0044422//organelle part;GO:0044444//cytoplasmic part;GO:0005623//cell;GO:0043229//intracellular organelle;GO:0044446//intracellular organelle part;GO:0044424//intracellular part;GO:0005774//vacuolar membrane;GO:0031224//intrinsic component of membrane;GO:0005737//cytoplasm;GO:0098588//bounding membrane of organelle;GO:0005622…	GO:0005215//transporter activity	GO:0032501//multicellular organismal process;GO:0019752//carboxylic acid metabolic process;GO:0009653//anatomical structure morphogenesis;GO:0065008//regulation of biological quality;GO:0048869//cellular developmental process;GO:1901605//alpha-amino acid metabolic process;GO:0050793//regulation of developmental process;GO:0033238//regulation of cellular amine metabolic process;GO:0009755//hormone…
UNIGENE0001394	ID_722	10	--	-	-	-	-
UNIGENE0001396	ID_723	12	--	-	-	-	-
UNIGENE0001398	ID_724	0	--	-	-	-	-
UNIGENE0001399	ID_725	10	--	-	-	-	-
UNIGENE0001400	ID_726	6	--	-	-	-	-
UNIGENE0001401	ID_727	12	--	-	-	-	-
UNIGENE0001403	ID_728	7	--	-	-	-	-
UNIGENE0001405	ID_729	21	PREDICTED: pentatricopeptide repeat-containing protein At5g48910 isoform X2 [Cucumis sativus]	-	-	GO:0042623//ATPase activity, coupled;GO:0016887//ATPase activity;GO:0016817//hydrolase activity, acting on acid anhydrides;GO:0016787//hydrolase activity;GO:0003824//catalytic activity;GO:0017111//nucleoside-triphosphatase activity;GO:0016818//hydrolase activity, acting on acid anhydrides, in phosphorus-containing anhydrides;GO:0016462//pyrophosphatase activity	GO:0008152//metabolic process;GO:0009987//cellular process
UNIGENE0001406	ID_730	10	--	-	-	-	-
UNIGENE0001407	ID_731	7	--	-	-	-	-
UNIGENE0001409	ID_732	9	hypothetical retrotransposon [Ipomoea batatas]	-	-	GO:0005488//binding	-
UNIGENE0001410	ID_733	3	PREDICTED: thioredoxin-like 2, chloroplastic [Cucumis sativus]	-	GO:0043227//membrane-bounded organelle;GO:0044444//cytoplasmic part;GO:0044424//intracellular part;GO:0005622//intracellular;GO:0043229//intracellular organelle;GO:0005623//cell;GO:0043231//intracellular membrane-bounded organelle;GO:0009536//plastid;GO:0005737//cytoplasm;GO:0043226//organelle;GO:0044464//cell part	GO:0016667//oxidoreductase activity, acting on a sulfur group of donors;GO:0016491//oxidoreductase activity;GO:0003824//catalytic activity;GO:0015036//disulfide oxidoreductase activity	GO:0044763//single-organism cellular process;GO:0009987//cellular process;GO:0044699//single-organism process;GO:0044710//single-organism metabolic process;GO:0019725//cellular homeostasis;GO:0018904//ether metabolic process;GO:0042592//homeostatic process;GO:0065007//biological regulation;GO:0065008//regulation of biological quality;GO:0008152//metabolic process;GO:0071704//organic substance met…
UNIGENE0001416	ID_734	15	PREDICTED: geraniol 8-hydroxylase-like [Cucumis sativus]	-	-	GO:0097159//organic cyclic compound binding;GO:0046914//transition metal ion binding;GO:0043169//cation binding;GO:0043167//ion binding;GO:0016491//oxidoreductase activity;GO:0005488//binding;GO:0046906//tetrapyrrole binding;GO:0046872//metal ion binding;GO:1901363//heterocyclic compound binding;GO:0003824//catalytic activity	GO:0008152//metabolic process;GO:0044710//single-organism metabolic process;GO:0044699//single-organism process
UNIGENE0001417	ID_735	15	PREDICTED: geraniol 8-hydroxylase-like [Cucumis melo]	-	-	GO:0003824//catalytic activity;GO:0043169//cation binding;GO:0046906//tetrapyrrole binding;GO:0046914//transition metal ion binding;GO:0043167//ion binding;GO:0016491//oxidoreductase activity;GO:0097159//organic cyclic compound binding;GO:0046872//metal ion binding;GO:1901363//heterocyclic compound binding;GO:0005488//binding	GO:0044699//single-organism process;GO:0008152//metabolic process;GO:0044710//single-organism metabolic process
UNIGENE0001418	ID_736	7	PREDICTED: vitellogenin-2 [Cicer arietinum]	-	-	-	-
UNIGENE0001420	ID_737	4	PREDICTED: MND1-interacting protein 1 [Cucumis melo]	-	-	GO:0043169//cation binding;GO:0043167//ion binding;GO:0046914//transition metal ion binding;GO:0046872//metal ion binding;GO:0005488//binding	-
UNIGENE0001422	ID_738	6	PREDICTED: transcription factor DIVARICATA-like [Cucumis melo]	-	GO:0005622//intracellular;GO:0044424//intracellular part;GO:0043229//intracellular organelle;GO:0005623//cell;GO:0043231//intracellular membrane-bounded organelle;GO:0043226//organelle;GO:0043227//membrane-bounded organelle;GO:0044464//cell part	GO:0005488//binding;GO:0097159//organic cyclic compound binding;GO:1901363//heterocyclic compound binding;GO:0003676//nucleic acid binding	-
UNIGENE0001425	ID_739	14	PREDICTED: microtubule-associated protein RP/EB family member 1C-like [Cucumis melo]	-	GO:0043231//intracellular membrane-bounded organelle;GO:0005623//cell;GO:0043227//membrane-bounded organelle;GO:0005622//intracellular;GO:0005856//cytoskeleton;GO:0071944//cell periphery;GO:0043232//intracellular non-membrane-bounded organelle;GO:0044444//cytoplasmic part;GO:0030312//external encapsulating structure;GO:0043229//intracellular organelle;GO:0015630//microtubule cytoskeleton;GO:00444…	GO:0005515//protein binding;GO:0015631//tubulin binding;GO:0008092//cytoskeletal protein binding;GO:0005488//binding	GO:0000280//nuclear division;GO:0044267//cellular protein metabolic process;GO:0044238//primary metabolic process;GO:0009987//cellular process;GO:0044699//single-organism process;GO:0007010//cytoskeleton organization;GO:0009628//response to abiotic stimulus;GO:0043933//macromolecular complex subunit organization;GO:0043412//macromolecule modification;GO:0009612//response to mechanical stimulus;GO…
UNIGENE0001426	ID_740	21	--	-	-	-	-
UNIGENE0001427	ID_741	25	orf120b (mitochondrion) [Beta vulgaris subsp. vulgaris]	-	-	GO:0005488//binding	-
UNIGENE0001430	ID_742	24	PREDICTED: zinc finger BED domain-containing protein DAYSLEEPER-like [Cucumis sativus]	-	-	GO:1901363//heterocyclic compound binding;GO:0005488//binding;GO:0097159//organic cyclic compound binding;GO:0005515//protein binding;GO:0003676//nucleic acid binding	-
UNIGENE0001431	ID_743	7	PREDICTED: zinc finger BED domain-containing protein DAYSLEEPER-like [Cucumis sativus]	-	-	GO:0005515//protein binding;GO:0003676//nucleic acid binding;GO:0097159//organic cyclic compound binding;GO:0005488//binding;GO:1901363//heterocyclic compound binding	-
UNIGENE0001433	ID_744	1	PREDICTED: patellin-6 [Cucumis sativus]	-	GO:0031224//intrinsic component of membrane;GO:0044424//intracellular part;GO:0044464//cell part;GO:0005623//cell;GO:0044425//membrane part;GO:0005622//intracellular;GO:0016020//membrane	GO:0005488//binding	GO:0051179//localization;GO:0044763//single-organism cellular process;GO:0044699//single-organism process;GO:0009987//cellular process;GO:0051234//establishment of localization
UNIGENE0001434	ID_745	21	--	-	-	-	-
UNIGENE0001439	ID_746	3	PREDICTED: adenylosuccinate synthetase, chloroplastic [Cucumis melo]	ko00230//Purine metabolism//Nucleotide metabolism//Metabolism;ko00250//Alanine, aspartate and glutamate metabolism//Amino acid metabolism//Metabolism	GO:0043226//organelle;GO:0009532//plastid stroma;GO:0043229//intracellular organelle;GO:0005622//intracellular;GO:0005623//cell;GO:0044446//intracellular organelle part;GO:0044435//plastid part;GO:0044464//cell part;GO:0044444//cytoplasmic part;GO:0044422//organelle part;GO:0043227//membrane-bounded organelle;GO:0043231//intracellular membrane-bounded organelle;GO:0044424//intracellular part;GO:0…	GO:0043169//cation binding;GO:0036094//small molecule binding;GO:0097367//carbohydrate derivative binding;GO:0016879//ligase activity, forming carbon-nitrogen bonds;GO:0043167//ion binding;GO:0016874//ligase activity;GO:0097159//organic cyclic compound binding;GO:0001882//nucleoside binding;GO:0005488//binding;GO:0032549//ribonucleoside binding;GO:0032550//purine ribonucleoside binding;GO:0046872…	GO:0006796//phosphate-containing compound metabolic process;GO:0006807//nitrogen compound metabolic process;GO:0071704//organic substance metabolic process;GO:0046129//purine ribonucleoside biosynthetic process;GO:0034641//cellular nitrogen compound metabolic process;GO:0006164//purine nucleotide biosynthetic process;GO:0046390//ribose phosphate biosynthetic process;GO:0090407//organophosphate bi…
UNIGENE0001440	ID_747	0	PREDICTED: ankyrin repeat-containing protein At3g12360-like [Cucumis melo]	-	-	-	-
UNIGENE0001441	ID_748	12	--	-	-	-	-
UNIGENE0001442	ID_749	15	PREDICTED: TMV resistance protein N-like [Cucumis melo]	-	-	-	-
UNIGENE0001443	ID_750	0	PREDICTED: protein IQ-DOMAIN 32 [Cucumis melo]	-	GO:0044424//intracellular part;GO:0044464//cell part;GO:0005623//cell;GO:0005622//intracellular	-	-
UNIGENE0001444	ID_751	12	--	-	-	-	-
UNIGENE0001445	ID_752	3	--	-	-	-	-
UNIGENE0001446	ID_753	12	--	-	-	-	-
UNIGENE0001447	ID_754	12	At2g06190 [Arabidopsis thaliana]	-	-	-	-
UNIGENE0001448	ID_755	20	PREDICTED: wall-associated receptor kinase-like 1 isoform X1 [Prunus mume]	-	-	GO:0003824//catalytic activity;GO:0097367//carbohydrate derivative binding;GO:0097159//organic cyclic compound binding;GO:0016772//transferase activity, transferring phosphorus-containing groups;GO:0032549//ribonucleoside binding;GO:0001883//purine nucleoside binding;GO:1901363//heterocyclic compound binding;GO:0004672//protein kinase activity;GO:0016773//phosphotransferase activity, alcohol grou…	GO:0006793//phosphorus metabolic process;GO:0043412//macromolecule modification;GO:0043170//macromolecule metabolic process;GO:0044238//primary metabolic process;GO:0044237//cellular metabolic process;GO:0036211//protein modification process;GO:0044260//cellular macromolecule metabolic process;GO:0044267//cellular protein metabolic process;GO:0008152//metabolic process;GO:0006464//cellular protei…
UNIGENE0001450	ID_756	7	PREDICTED: salicylic acid-binding protein 2-like [Cucumis sativus]	-	-	-	-
UNIGENE0001451	ID_757	9	--	-	-	-	-
UNIGENE0001452	ID_758	2	hypothetical protein Csa_1G042280 [Cucumis sativus]	-	-	-	-
UNIGENE0001454	ID_759	12	--	-	-	-	-
UNIGENE0001455	ID_760	4	PREDICTED: zinc finger Ran-binding domain-containing protein 2 [Cucumis melo]	-	-	GO:0005488//binding;GO:0046914//transition metal ion binding;GO:0046872//metal ion binding;GO:0043167//ion binding;GO:0043169//cation binding	-
UNIGENE0001456	ID_761	11	--	-	-	-	-
UNIGENE0001457	ID_762	10	Replication factor C subunit 3 [Glycine soja]	ko03420//Nucleotide excision repair//Replication and repair//Genetic Information Processing;ko03030//DNA replication//Replication and repair//Genetic Information Processing;ko03430//Mismatch repair//Replication and repair//Genetic Information Processing	-	GO:0003676//nucleic acid binding;GO:0097159//organic cyclic compound binding;GO:1901363//heterocyclic compound binding;GO:0005488//binding	GO:0090304//nucleic acid metabolic process;GO:0044237//cellular metabolic process;GO:0006259//DNA metabolic process;GO:0044238//primary metabolic process;GO:1901360//organic cyclic compound metabolic process;GO:0044260//cellular macromolecule metabolic process;GO:0006725//cellular aromatic compound metabolic process;GO:0043170//macromolecule metabolic process;GO:0046483//heterocycle metabolic pro…
UNIGENE0001459	ID_763	20	PREDICTED: uncharacterized protein At3g28850 [Cucumis melo]	-	-	GO:0003824//catalytic activity;GO:0016667//oxidoreductase activity, acting on a sulfur group of donors;GO:0015036//disulfide oxidoreductase activity;GO:0016491//oxidoreductase activity	GO:0009987//cellular process;GO:0044699//single-organism process;GO:0044763//single-organism cellular process;GO:0008152//metabolic process;GO:0042592//homeostatic process;GO:0065007//biological regulation;GO:0065008//regulation of biological quality;GO:0044710//single-organism metabolic process;GO:0019725//cellular homeostasis
UNIGENE0001465	ID_764	3	--	-	-	-	-
UNIGENE0001466	ID_765	12	--	-	-	-	-
UNIGENE0001467	ID_766	12	--	-	-	-	-
UNIGENE0001468	ID_767	9	--	-	-	-	-
UNIGENE0001469	ID_768	9	--	-	-	-	-
UNIGENE0001470	ID_769	22	PREDICTED: kinesin-like protein KIF21A [Populus euphratica]	-	-	-	-
UNIGENE0001471	ID_770	15	PREDICTED: kinesin-like protein KIF21A [Populus euphratica]	-	-	-	-
UNIGENE0001472	ID_771	4	--	-	-	-	-
UNIGENE0001475	ID_772	8	Os06g0163300 [Oryza sativa Japonica Group]	-	-	-	-
UNIGENE0001477	ID_773	12	--	-	-	-	-
UNIGENE0001478	ID_774	12	PREDICTED: reticulon-like protein B9 [Vitis vinifera]	-	GO:0016020//membrane	-	-
UNIGENE0001482	ID_775	16	--	-	-	-	-
UNIGENE0001487	ID_776	22	PREDICTED: pentatricopeptide repeat-containing protein At2g13600-like [Cucumis melo]	-	-	-	-
UNIGENE0001491	ID_777	12	--	-	-	-	-
UNIGENE0001494	ID_778	12	PREDICTED: LOW QUALITY PROTEIN: S-type anion channel SLAH3-like [Malus domestica]	-	-	GO:0005488//binding	-
UNIGENE0001495	ID_779	8	PREDICTED: pentatricopeptide repeat-containing protein At1g02060, chloroplastic-like [Cucumis melo]	-	-	-	-
UNIGENE0001497	ID_780	10	--	-	-	-	-
UNIGENE0001498	ID_781	12	--	-	-	-	-
UNIGENE0001499	ID_782	10	OSIGBa0161P06.2 [Oryza sativa Indica Group]	-	-	-	-
UNIGENE0001500	ID_783	12	--	-	-	-	-
UNIGENE0001503	ID_784	3	--	-	-	-	-
UNIGENE0001504	ID_785	12	PREDICTED: uncharacterized protein LOC105435019 [Cucumis sativus]	-	-	-	-
UNIGENE0001509	ID_786	23	--	-	-	-	-
UNIGENE0001510	ID_787	12	--	-	-	-	-
UNIGENE0001514	ID_788	9	--	-	-	-	-
UNIGENE0001520	ID_789	10	PREDICTED: ankyrin-1 [Cucumis melo]	-	-	-	-
UNIGENE0001521	ID_790	6	--	-	-	-	-
UNIGENE0001524	ID_791	6	--	-	-	-	-
UNIGENE0001529	ID_792	9	--	-	-	-	-
UNIGENE0001530	ID_793	12	--	-	-	-	-
UNIGENE0001533	ID_794	12	--	-	-	-	-
UNIGENE0001534	ID_795	9	PREDICTED: glutaredoxin-C9 [Cucumis melo]	-	-	GO:0016491//oxidoreductase activity;GO:0015036//disulfide oxidoreductase activity;GO:0016667//oxidoreductase activity, acting on a sulfur group of donors;GO:0003824//catalytic activity	GO:0042592//homeostatic process;GO:0065007//biological regulation;GO:0065008//regulation of biological quality;GO:0044710//single-organism metabolic process;GO:0009987//cellular process;GO:0019725//cellular homeostasis;GO:0044699//single-organism process;GO:0008152//metabolic process;GO:0044763//single-organism cellular process
UNIGENE0001536	ID_796	7	--	-	-	-	-
UNIGENE0001537	ID_797	19	probable xyloglucan endotransglucosylase/hydrolase protein 23-like precursor [Cucumis sativus]	-	GO:0005623//cell;GO:0005576//extracellular region;GO:0071944//cell periphery;GO:0030312//external encapsulating structure;GO:0044464//cell part	GO:0016757//transferase activity, transferring glycosyl groups;GO:0016740//transferase activity;GO:0016798//hydrolase activity, acting on glycosyl bonds;GO:0003824//catalytic activity;GO:0016787//hydrolase activity;GO:0016758//transferase activity, transferring hexosyl groups	GO:0045229//external encapsulating structure organization;GO:0008152//metabolic process;GO:0071840//cellular component organization or biogenesis;GO:0005976//polysaccharide metabolic process;GO:0044238//primary metabolic process;GO:0005975//carbohydrate metabolic process;GO:0043170//macromolecule metabolic process;GO:0009987//cellular process;GO:0016043//cellular component organization;GO:0071704…
UNIGENE0001538	ID_798	21	probable xyloglucan endotransglucosylase/hydrolase protein 23-like precursor [Cucumis sativus]	-	GO:0005576//extracellular region;GO:0044464//cell part;GO:0030312//external encapsulating structure;GO:0005623//cell;GO:0071944//cell periphery	GO:0016758//transferase activity, transferring hexosyl groups;GO:0016740//transferase activity;GO:0016787//hydrolase activity;GO:0016798//hydrolase activity, acting on glycosyl bonds;GO:0016757//transferase activity, transferring glycosyl groups;GO:0003824//catalytic activity	GO:0071704//organic substance metabolic process;GO:0043170//macromolecule metabolic process;GO:0044238//primary metabolic process;GO:0016043//cellular component organization;GO:0008152//metabolic process;GO:0044042//glucan metabolic process;GO:0009987//cellular process;GO:0005975//carbohydrate metabolic process;GO:0045229//external encapsulating structure organization;GO:0005976//polysaccharide m…
UNIGENE0001542	ID_799	5	Ty3/gypsy retrotransposon protein [Beta vulgaris subsp. vulgaris]	-	-	-	-
UNIGENE0001545	ID_800	2	--	-	-	-	-
UNIGENE0001547	ID_801	10	bZIP-like protein [Oryza sativa Japonica Group]	-	-	-	-
UNIGENE0001548	ID_802	7	PREDICTED: transposon Tf2-1 polyprotein isoform X1 [Beta vulgaris subsp. vulgaris]	-	GO:0043226//organelle;GO:0005623//cell;GO:0044424//intracellular part;GO:0043227//membrane-bounded organelle;GO:0043231//intracellular membrane-bounded organelle;GO:0005622//intracellular;GO:0043229//intracellular organelle;GO:0044464//cell part	-	GO:0044237//cellular metabolic process;GO:0090304//nucleic acid metabolic process;GO:0034641//cellular nitrogen compound metabolic process;GO:1901360//organic cyclic compound metabolic process;GO:0044238//primary metabolic process;GO:0044260//cellular macromolecule metabolic process;GO:0006725//cellular aromatic compound metabolic process;GO:0043170//macromolecule metabolic process;GO:0009987//ce…
UNIGENE0001549	ID_803	24	PREDICTED: E3 ubiquitin-protein ligase RNF181-like [Cucumis sativus]	-	-	GO:0005488//binding;GO:0046914//transition metal ion binding;GO:0043167//ion binding;GO:0046872//metal ion binding;GO:0043169//cation binding	-
UNIGENE0001552	ID_804	12	--	-	-	-	-
UNIGENE0001554	ID_805	7	--	-	-	-	-
UNIGENE0001555	ID_806	23	PREDICTED: auxin efflux carrier component 4-like [Cucumis melo]	-	GO:0031224//intrinsic component of membrane;GO:0044425//membrane part;GO:0016020//membrane	-	GO:0044763//single-organism cellular process;GO:0009987//cellular process;GO:0044699//single-organism process
UNIGENE0001557	ID_807	10	--	-	-	-	-
UNIGENE0001559	ID_808	6	--	-	-	-	-
UNIGENE0001560	ID_809	24	--	-	-	-	-
UNIGENE0001561	ID_810	21	--	-	-	-	-
UNIGENE0001562	ID_811	12	--	-	-	-	-
UNIGENE0001566	ID_812	12	--	-	-	-	-
UNIGENE0001569	ID_813	6	--	-	-	-	-
UNIGENE0001570	ID_814	21	seed maturation protein PM35 [Glycine max]	-	-	-	-
UNIGENE0001571	ID_815	12	--	-	-	-	-
UNIGENE0001577	ID_816	24	PREDICTED: peroxidase 18 [Cucumis melo]	ko00940//Phenylpropanoid biosynthesis//Biosynthesis of other secondary metabolites//Metabolism	-	GO:0046906//tetrapyrrole binding;GO:1901363//heterocyclic compound binding;GO:0016209//antioxidant activity;GO:0097159//organic cyclic compound binding;GO:0003824//catalytic activity;GO:0043167//ion binding;GO:0043169//cation binding;GO:0005488//binding	GO:0008152//metabolic process;GO:0050896//response to stimulus;GO:0006950//response to stress;GO:0044710//single-organism metabolic process;GO:0044699//single-organism process
UNIGENE0001578	ID_817	10	PREDICTED: cytochrome P450 78A5-like [Cucumis melo]	-	-	GO:0046906//tetrapyrrole binding;GO:1901363//heterocyclic compound binding;GO:0046872//metal ion binding;GO:0016705//oxidoreductase activity, acting on paired donors, with incorporation or reduction of molecular oxygen;GO:0097159//organic cyclic compound binding;GO:0043167//ion binding;GO:0016491//oxidoreductase activity;GO:0046914//transition metal ion binding;GO:0043169//cation binding;GO:00054…	GO:0044699//single-organism process;GO:0008152//metabolic process;GO:0044710//single-organism metabolic process
UNIGENE0001580	ID_818	20	--	-	-	-	-
UNIGENE0001581	ID_819	6	PREDICTED: pentatricopeptide repeat-containing protein At1g79080, chloroplastic [Cucumis melo]	-	GO:0043226//organelle;GO:0009536//plastid;GO:0005737//cytoplasm;GO:0044464//cell part;GO:0044424//intracellular part;GO:0005622//intracellular;GO:0005623//cell;GO:0043231//intracellular membrane-bounded organelle;GO:0043227//membrane-bounded organelle;GO:0044444//cytoplasmic part;GO:0043229//intracellular organelle	-	-
UNIGENE0001585	ID_820	12	--	-	-	-	-
UNIGENE0001587	ID_821	3	PREDICTED: suppressor protein SRP40 [Cucumis melo]	-	-	-	-
UNIGENE0001588	ID_822	12	--	-	-	-	-
UNIGENE0001589	ID_823	12	--	-	-	-	-
UNIGENE0001592	ID_824	6	--	-	-	-	-
UNIGENE0001593	ID_825	9	--	-	-	-	-
UNIGENE0001596	ID_826	21	PREDICTED: oleosin 18.2 kDa-like [Cucumis sativus]	-	GO:0043232//intracellular non-membrane-bounded organelle;GO:0044425//membrane part;GO:0005623//cell;GO:0043228//non-membrane-bounded organelle;GO:0044424//intracellular part;GO:0005811//lipid particle;GO:0043229//intracellular organelle;GO:0016020//membrane;GO:0005622//intracellular;GO:0044464//cell part;GO:0043226//organelle;GO:0031224//intrinsic component of membrane	-	-
UNIGENE0001598	ID_827	12	hypothetical protein Csa_2G432240 [Cucumis sativus]	-	-	-	-
UNIGENE0001601	ID_828	17	Class I glutamine amidotransferase-like superfamily protein [Theobroma cacao]	-	-	GO:0003824//catalytic activity	GO:0006807//nitrogen compound metabolic process;GO:0006082//organic acid metabolic process;GO:0043436//oxoacid metabolic process;GO:1901564//organonitrogen compound metabolic process;GO:0044281//small molecule metabolic process;GO:0044699//single-organism process;GO:0044763//single-organism cellular process;GO:0009064//glutamine family amino acid metabolic process;GO:1901605//alpha-amino acid met…
UNIGENE0001602	ID_829	2	PREDICTED: cellulose synthase-like protein B4 [Cucumis sativus]	-	GO:0031224//intrinsic component of membrane;GO:0016020//membrane;GO:0044425//membrane part	GO:0003824//catalytic activity;GO:0016740//transferase activity;GO:0016757//transferase activity, transferring glycosyl groups;GO:0046527//glucosyltransferase activity;GO:0016758//transferase activity, transferring hexosyl groups;GO:0016759//cellulose synthase activity	GO:0008152//metabolic process;GO:0051273//beta-glucan metabolic process;GO:0006073//cellular glucan metabolic process;GO:0005975//carbohydrate metabolic process;GO:0044260//cellular macromolecule metabolic process;GO:0044237//cellular metabolic process;GO:0005976//polysaccharide metabolic process;GO:0044238//primary metabolic process;GO:0009987//cellular process;GO:0071704//organic substance meta…
UNIGENE0001603	ID_830	11	--	-	-	-	-
UNIGENE0001605	ID_831	4	--	-	-	-	-
UNIGENE0001606	ID_832	12	--	-	-	-	-
UNIGENE0001608	ID_833	23	PREDICTED: pentatricopeptide repeat-containing protein At3g24000, mitochondrial isoform X2 [Cucumis sativus]	-	-	-	-
UNIGENE0001609	ID_834	1	PREDICTED: pentatricopeptide repeat-containing protein At3g24000, mitochondrial isoform X2 [Cucumis sativus]	-	-	GO:0016817//hydrolase activity, acting on acid anhydrides;GO:0017111//nucleoside-triphosphatase activity;GO:0016887//ATPase activity;GO:0016462//pyrophosphatase activity;GO:0016787//hydrolase activity;GO:0016818//hydrolase activity, acting on acid anhydrides, in phosphorus-containing anhydrides;GO:0042623//ATPase activity, coupled;GO:0003824//catalytic activity	-
UNIGENE0001610	ID_835	0	chlorophyll a/b-binding protein type II precursor [Populus trichocarpa]	ko00196//Photosynthesis - antenna proteins//Energy metabolism//Metabolism	GO:0044464//cell part;GO:0031224//intrinsic component of membrane;GO:0009579//thylakoid;GO:0043234//protein complex;GO:0009521//photosystem;GO:0005622//intracellular;GO:0005623//cell;GO:0043231//intracellular membrane-bounded organelle;GO:0005737//cytoplasm;GO:0044446//intracellular organelle part;GO:0016020//membrane;GO:0043227//membrane-bounded organelle;GO:0044444//cytoplasmic part;GO:0044422/…	GO:0043169//cation binding;GO:0005488//binding;GO:1901363//heterocyclic compound binding;GO:0097159//organic cyclic compound binding;GO:0046906//tetrapyrrole binding;GO:0043167//ion binding	GO:0071704//organic substance metabolic process;GO:0006091//generation of precursor metabolites and energy;GO:0019538//protein metabolic process;GO:0036211//protein modification process;GO:0044267//cellular protein metabolic process;GO:0044260//cellular macromolecule metabolic process;GO:0006464//cellular protein modification process;GO:0044238//primary metabolic process;GO:0009987//cellular proc…
UNIGENE0001612	ID_836	12	--	-	-	-	-
UNIGENE0001614	ID_837	7	--	-	-	-	-
UNIGENE0001615	ID_838	19	--	-	-	-	-
UNIGENE0001619	ID_839	2	--	-	-	-	-
UNIGENE0001622	ID_840	12	--	-	-	-	-
UNIGENE0001623	ID_841	1	PREDICTED: bidirectional sugar transporter SWEET10 [Cucumis sativus]	-	GO:0016021//integral component of membrane;GO:0031224//intrinsic component of membrane;GO:0044425//membrane part;GO:0016020//membrane	GO:0015144//carbohydrate transmembrane transporter activity;GO:0015154//disaccharide transmembrane transporter activity;GO:0005215//transporter activity;GO:0015157//oligosaccharide transmembrane transporter activity;GO:0022892//substrate-specific transporter activity;GO:0022891//substrate-specific transmembrane transporter activity;GO:0022857//transmembrane transporter activity;GO:0051119//sugar …	GO:0051179//localization;GO:0044765//single-organism transport;GO:0015766//disaccharide transport;GO:0008643//carbohydrate transport;GO:0044699//single-organism process;GO:0006810//transport;GO:1902578//single-organism localization;GO:0051234//establishment of localization;GO:0071702//organic substance transport;GO:0015772//oligosaccharide transport
UNIGENE0001625	ID_842	23	PREDICTED: kinesin-like protein BC2 [Cucumis sativus]	-	GO:0044446//intracellular organelle part;GO:0032991//macromolecular complex;GO:0043234//protein complex;GO:0030054//cell junction;GO:0043226//organelle;GO:0043228//non-membrane-bounded organelle;GO:0005911//cell-cell junction;GO:0043232//intracellular non-membrane-bounded organelle;GO:0005856//cytoskeleton;GO:0044464//cell part;GO:0005875//microtubule associated complex;GO:0044422//organelle part…	GO:0097367//carbohydrate derivative binding;GO:0001882//nucleoside binding;GO:0016462//pyrophosphatase activity;GO:0008092//cytoskeletal protein binding;GO:0036094//small molecule binding;GO:0005515//protein binding;GO:0015631//tubulin binding;GO:0097159//organic cyclic compound binding;GO:0032549//ribonucleoside binding;GO:0003824//catalytic activity;GO:0032550//purine ribonucleoside binding;GO:…	GO:1902410//mitotic cytokinetic process;GO:0009987//cellular process;GO:1903047//mitotic cell cycle process;GO:0000910//cytokinesis;GO:0000278//mitotic cell cycle;GO:0000281//mitotic cytokinesis;GO:0007017//microtubule-based process;GO:0051301//cell division;GO:0061640//cytoskeleton-dependent cytokinesis;GO:0022402//cell cycle process;GO:0032506//cytokinetic process;GO:0007049//cell cycle;GO:0044…
UNIGENE0001626	ID_843	22	IST1-like protein [Gossypium arboreum]	ko04144//Endocytosis//Transport and catabolism//Cellular Processes	-	-	GO:0050896//response to stimulus
UNIGENE0001629	ID_844	12	--	-	-	-	-
UNIGENE0001632	ID_845	7	PREDICTED: protein EARLY RESPONSIVE TO DEHYDRATION 15-like [Cucumis melo]	-	-	-	-
UNIGENE0001633	ID_846	3	--	-	-	-	-
UNIGENE0001636	ID_847	6	--	-	-	-	-
UNIGENE0001637	ID_848	15	--	-	-	-	-
UNIGENE0001641	ID_849	14	--	-	-	-	-
UNIGENE0001644	ID_850	9	BnaA08g10720D [Brassica napus]	-	-	-	-
UNIGENE0001646	ID_851	1	--	-	-	-	-
UNIGENE0001649	ID_852	5	non-ltr retroelement reverse transcriptase [Rosa rugosa]	-	-	-	-
UNIGENE0001650	ID_853	6	OSJNBa0086O06.14 [Oryza sativa Japonica Group]	-	-	GO:0016740//transferase activity;GO:0003824//catalytic activity;GO:0016772//transferase activity, transferring phosphorus-containing groups;GO:0097159//organic cyclic compound binding;GO:0005488//binding;GO:1901363//heterocyclic compound binding	GO:0006725//cellular aromatic compound metabolic process;GO:0043170//macromolecule metabolic process;GO:0044237//cellular metabolic process;GO:0009987//cellular process;GO:0006139//nucleobase-containing compound metabolic process;GO:1901360//organic cyclic compound metabolic process;GO:0071704//organic substance metabolic process;GO:0046483//heterocycle metabolic process;GO:0006807//nitrogen comp…
UNIGENE0001651	ID_854	12	--	-	-	-	-
UNIGENE0001652	ID_855	15	--	-	-	-	-
UNIGENE0001654	ID_856	2	--	-	-	-	-
UNIGENE0001655	ID_857	12	--	-	-	-	-
UNIGENE0001656	ID_858	12	--	-	-	-	-
UNIGENE0001657	ID_859	21	Upstream activation factor subunit spp27 [Morus notabilis]	-	-	-	-
UNIGENE0001659	ID_860	7	Retrovirus-related Pol polyprotein from transposon TNT 1-94, partial [Glycine soja]	ko04120//Ubiquitin mediated proteolysis//Folding, sorting and degradation//Genetic Information Processing	-	GO:0043169//cation binding;GO:0005488//binding;GO:0000166//nucleotide binding;GO:0036094//small molecule binding;GO:0046872//metal ion binding;GO:1901265//nucleoside phosphate binding;GO:0043167//ion binding;GO:0097159//organic cyclic compound binding;GO:0003824//catalytic activity;GO:1901363//heterocyclic compound binding	GO:0044237//cellular metabolic process;GO:0043170//macromolecule metabolic process;GO:0009987//cellular process;GO:0006725//cellular aromatic compound metabolic process;GO:0046483//heterocycle metabolic process;GO:0071704//organic substance metabolic process;GO:0044260//cellular macromolecule metabolic process;GO:0008152//metabolic process;GO:0034641//cellular nitrogen compound metabolic process;…
UNIGENE0001661	ID_861	12	--	-	-	-	-
UNIGENE0001664	ID_862	21	--	-	-	-	-
UNIGENE0001665	ID_863	11	PREDICTED: fatty acid desaturase 4, chloroplastic [Cucumis sativus]	-	-	-	-
UNIGENE0001666	ID_864	9	--	-	-	-	-
UNIGENE0001671	ID_865	20	--	-	-	-	-
UNIGENE0001672	ID_866	7	--	-	-	-	-
UNIGENE0001673	ID_867	23	--	-	-	-	-
UNIGENE0001675	ID_868	12	--	-	-	-	-
UNIGENE0001677	ID_869	6	PREDICTED: BTB/POZ domain-containing protein At3g05675 [Cucumis sativus]	-	-	-	GO:0044260//cellular macromolecule metabolic process;GO:0019538//protein metabolic process;GO:0070647//protein modification by small protein conjugation or removal;GO:0043170//macromolecule metabolic process;GO:0006464//cellular protein modification process;GO:0032446//protein modification by small protein conjugation;GO:0009987//cellular process;GO:0044267//cellular protein metabolic process;GO:…
UNIGENE0001678	ID_870	15	PREDICTED: BTB/POZ domain-containing protein At3g05675 [Cucumis sativus]	-	-	-	GO:0043170//macromolecule metabolic process;GO:0044237//cellular metabolic process;GO:0006464//cellular protein modification process;GO:0044260//cellular macromolecule metabolic process;GO:0044238//primary metabolic process;GO:0044267//cellular protein metabolic process;GO:0036211//protein modification process;GO:0070647//protein modification by small protein conjugation or removal;GO:0019538//pr…
UNIGENE0001679	ID_871	12	--	-	-	-	-
UNIGENE0001680	ID_872	12	--	-	-	-	-
UNIGENE0001687	ID_873	20	legume-specific protein [Aeschynomene indica]	-	-	-	-
UNIGENE0001688	ID_874	9	--	-	-	-	-
UNIGENE0001690	ID_875	12	--	-	-	-	-
UNIGENE0001691	ID_876	6	--	-	-	-	-
UNIGENE0001693	ID_877	5	--	-	-	-	-
UNIGENE0001694	ID_878	6	mTERF domain-containing 1, mitochondrial [Gossypium arboreum]	-	GO:0005623//cell;GO:0043229//intracellular organelle;GO:0043227//membrane-bounded organelle;GO:0043226//organelle;GO:0044424//intracellular part;GO:0043231//intracellular membrane-bounded organelle;GO:0009536//plastid;GO:0044464//cell part;GO:0044444//cytoplasmic part;GO:0005622//intracellular;GO:0005737//cytoplasm	GO:0003676//nucleic acid binding;GO:1901363//heterocyclic compound binding;GO:0043566//structure-specific DNA binding;GO:0005488//binding;GO:0003677//DNA binding;GO:0097159//organic cyclic compound binding	GO:0019222//regulation of metabolic process;GO:0050789//regulation of biological process;GO:0065007//biological regulation;GO:0060255//regulation of macromolecule metabolic process;GO:0010468//regulation of gene expression
UNIGENE0001695	ID_879	11	PREDICTED: UDP-glycosyltransferase 85A5-like [Cucumis melo]	-	-	GO:0016757//transferase activity, transferring glycosyl groups;GO:0016740//transferase activity;GO:0046527//glucosyltransferase activity;GO:0016758//transferase activity, transferring hexosyl groups;GO:0008194//UDP-glycosyltransferase activity;GO:0035251//UDP-glucosyltransferase activity;GO:0003824//catalytic activity	-
UNIGENE0001697	ID_880	20	--	-	-	-	-
UNIGENE0001698	ID_881	20	--	-	-	-	-
UNIGENE0001702	ID_882	12	--	-	-	-	-
UNIGENE0001704	ID_883	3	--	-	-	-	-
UNIGENE0001705	ID_884	11	PREDICTED: glycerol-3-phosphate dehydrogenase [NAD(+)] [Cucumis sativus]	ko00564//Glycerophospholipid metabolism//Lipid metabolism//Metabolism	GO:0044464//cell part;GO:0044444//cytoplasmic part;GO:0005737//cytoplasm;GO:0044424//intracellular part;GO:0043229//intracellular organelle;GO:0005623//cell;GO:0009536//plastid;GO:0043226//organelle;GO:0005622//intracellular;GO:0043231//intracellular membrane-bounded organelle;GO:0043227//membrane-bounded organelle	GO:0048037//cofactor binding;GO:0005515//protein binding;GO:0016616//oxidoreductase activity, acting on the CH-OH group of donors, NAD or NADP as acceptor;GO:0016491//oxidoreductase activity;GO:0003824//catalytic activity;GO:0097159//organic cyclic compound binding;GO:0046983//protein dimerization activity;GO:0005488//binding;GO:0016614//oxidoreductase activity, acting on CH-OH group of donors;GO…	GO:0008152//metabolic process;GO:0006629//lipid metabolic process;GO:0044763//single-organism cellular process;GO:0044710//single-organism metabolic process;GO:0044255//cellular lipid metabolic process;GO:0052646//alditol phosphate metabolic process;GO:0044238//primary metabolic process;GO:0019637//organophosphate metabolic process;GO:0006793//phosphorus metabolic process;GO:0009987//cellular pro…
UNIGENE0001706	ID_885	12	--	-	-	-	-
UNIGENE0001708	ID_886	12	PREDICTED: abscisic acid 8'-hydroxylase 4-like [Cucumis melo]	ko00906//Carotenoid biosynthesis//Metabolism of terpenoids and polyketides//Metabolism	-	GO:0016705//oxidoreductase activity, acting on paired donors, with incorporation or reduction of molecular oxygen;GO:0004497//monooxygenase activity;GO:0043169//cation binding;GO:0043167//ion binding;GO:0097159//organic cyclic compound binding;GO:0046872//metal ion binding;GO:0046914//transition metal ion binding;GO:0016491//oxidoreductase activity;GO:0046906//tetrapyrrole binding;GO:0003824//cat…	GO:0044699//single-organism process;GO:0008152//metabolic process;GO:0044710//single-organism metabolic process
UNIGENE0001709	ID_887	9	BnaC04g00480D [Brassica napus]	-	-	-	-
UNIGENE0001710	ID_888	21	PREDICTED: phragmoplast orienting kinesin-1 isoform X2 [Cucumis sativus]	-	GO:0043234//protein complex;GO:0044422//organelle part;GO:0044464//cell part;GO:0005623//cell;GO:0043229//intracellular organelle;GO:0005856//cytoskeleton;GO:0044424//intracellular part;GO:0044430//cytoskeletal part;GO:0043226//organelle;GO:0015630//microtubule cytoskeleton;GO:0005622//intracellular;GO:0032991//macromolecular complex;GO:0044446//intracellular organelle part;GO:0005875//microtubul…	GO:0016787//hydrolase activity;GO:0001882//nucleoside binding;GO:0032549//ribonucleoside binding;GO:0032550//purine ribonucleoside binding;GO:0005488//binding;GO:0003774//motor activity;GO:0016817//hydrolase activity, acting on acid anhydrides;GO:0016462//pyrophosphatase activity;GO:0097367//carbohydrate derivative binding;GO:0017111//nucleoside-triphosphatase activity;GO:0003824//catalytic activ…	GO:0044763//single-organism cellular process;GO:0044699//single-organism process;GO:0009987//cellular process;GO:0007017//microtubule-based process
UNIGENE0001711	ID_889	6	--	-	-	-	-
UNIGENE0001715	ID_890	12	--	-	-	-	-
UNIGENE0001717	ID_891	7	--	-	-	-	-
UNIGENE0001718	ID_892	18	PREDICTED: GATA transcription factor 9-like [Cucumis sativus]	-	GO:0043231//intracellular membrane-bounded organelle;GO:0043229//intracellular organelle;GO:0005622//intracellular;GO:0044424//intracellular part;GO:0044464//cell part;GO:0043226//organelle;GO:0005623//cell;GO:0043227//membrane-bounded organelle	GO:0046872//metal ion binding;GO:0043167//ion binding;GO:0043169//cation binding;GO:0046914//transition metal ion binding;GO:0003677//DNA binding;GO:1901363//heterocyclic compound binding;GO:0005488//binding;GO:0097159//organic cyclic compound binding;GO:0001071//nucleic acid binding transcription factor activity;GO:0003676//nucleic acid binding	GO:1903506//regulation of nucleic acid-templated transcription;GO:0051252//regulation of RNA metabolic process;GO:0050789//regulation of biological process;GO:0006355//regulation of transcription, DNA-templated;GO:0051171//regulation of nitrogen compound metabolic process;GO:0019219//regulation of nucleobase-containing compound metabolic process;GO:0009889//regulation of biosynthetic process;GO:0…
UNIGENE0001721	ID_893	4	--	-	-	-	-
UNIGENE0001722	ID_894	12	PREDICTED: UDP-glucose:glycoprotein glucosyltransferase [Cucumis sativus]	ko04141//Protein processing in endoplasmic reticulum//Folding, sorting and degradation//Genetic Information Processing	-	-	-
UNIGENE0001723	ID_895	6	--	-	-	-	-
UNIGENE0001726	ID_896	25	PREDICTED: AP2/ERF and B3 domain-containing transcription factor RAV1-like [Cucumis sativus]	-	-	-	GO:0044260//cellular macromolecule metabolic process;GO:0071704//organic substance metabolic process;GO:0043170//macromolecule metabolic process;GO:0009058//biosynthetic process;GO:0009059//macromolecule biosynthetic process;GO:0044237//cellular metabolic process;GO:0009987//cellular process;GO:0008152//metabolic process;GO:0034645//cellular macromolecule biosynthetic process;GO:0010467//gene exp…
UNIGENE0001727	ID_897	12	--	-	-	-	-
UNIGENE0001729	ID_898	12	--	-	-	-	-
UNIGENE0001730	ID_899	11	PREDICTED: NAC domain-containing protein 21/22-like [Cucumis sativus]	-	GO:0043226//organelle;GO:0005623//cell;GO:0044424//intracellular part;GO:0005622//intracellular;GO:0043227//membrane-bounded organelle;GO:0043229//intracellular organelle;GO:0044464//cell part;GO:0043231//intracellular membrane-bounded organelle	GO:0003676//nucleic acid binding;GO:1901363//heterocyclic compound binding;GO:0005488//binding;GO:0097159//organic cyclic compound binding	GO:1901576//organic substance biosynthetic process;GO:0009987//cellular process;GO:0008152//metabolic process;GO:0019222//regulation of metabolic process;GO:0065007//biological regulation;GO:0010468//regulation of gene expression;GO:0009059//macromolecule biosynthetic process;GO:0071704//organic substance metabolic process;GO:0009058//biosynthetic process;GO:0044260//cellular macromolecule metabo…
UNIGENE0001732	ID_900	10	NAC transcription factor-like protein [Medicago truncatula]	-	GO:0044424//intracellular part;GO:0005623//cell;GO:0043229//intracellular organelle;GO:0005622//intracellular;GO:0043231//intracellular membrane-bounded organelle;GO:0044464//cell part;GO:0043227//membrane-bounded organelle;GO:0043226//organelle	GO:0001071//nucleic acid binding transcription factor activity;GO:0097159//organic cyclic compound binding;GO:0003676//nucleic acid binding;GO:1901363//heterocyclic compound binding;GO:0005488//binding	GO:0060255//regulation of macromolecule metabolic process;GO:0044249//cellular biosynthetic process;GO:0050789//regulation of biological process;GO:0043170//macromolecule metabolic process;GO:0009059//macromolecule biosynthetic process;GO:0008152//metabolic process;GO:1901576//organic substance biosynthetic process;GO:0010468//regulation of gene expression;GO:0044237//cellular metabolic process;G…
UNIGENE0001735	ID_901	6	PREDICTED: superkiller viralicidic activity 2-like 2 [Nicotiana tomentosiformis]	-	-	GO:0046872//metal ion binding;GO:0097159//organic cyclic compound binding;GO:0043169//cation binding;GO:0043167//ion binding;GO:0046914//transition metal ion binding;GO:0005488//binding	-
UNIGENE0001742	ID_902	10	--	-	-	-	-
UNIGENE0001746	ID_903	12	--	-	-	-	-
UNIGENE0001747	ID_904	12	--	-	-	-	-
UNIGENE0001748	ID_905	12	--	-	-	-	-
UNIGENE0001749	ID_906	12	--	-	-	-	-
UNIGENE0001751	ID_907	12	--	-	-	-	-
UNIGENE0001752	ID_908	12	Tubulin--tyrosine ligase-like protein 12 [Aegilops tauschii]	-	GO:0043227//membrane-bounded organelle;GO:0005737//cytoplasm;GO:0005623//cell;GO:0044444//cytoplasmic part;GO:0043229//intracellular organelle;GO:0043231//intracellular membrane-bounded organelle;GO:0044464//cell part;GO:0009536//plastid;GO:0005622//intracellular;GO:0044424//intracellular part;GO:0043226//organelle	GO:1901363//heterocyclic compound binding;GO:0003824//catalytic activity;GO:0097159//organic cyclic compound binding;GO:0016779//nucleotidyltransferase activity;GO:0016740//transferase activity;GO:0003676//nucleic acid binding;GO:0005488//binding;GO:0016772//transferase activity, transferring phosphorus-containing groups;GO:0034061//DNA polymerase activity	GO:0009987//cellular process;GO:0044260//cellular macromolecule metabolic process;GO:0006260//DNA replication;GO:0071704//organic substance metabolic process;GO:1901576//organic substance biosynthetic process;GO:0090304//nucleic acid metabolic process;GO:0006139//nucleobase-containing compound metabolic process;GO:0006259//DNA metabolic process;GO:0034641//cellular nitrogen compound metabolic pro…
UNIGENE0001753	ID_909	9	--	-	-	-	-
UNIGENE0001754	ID_910	7	--	-	-	-	-
UNIGENE0001755	ID_911	6	Electron transfer flavoprotein-ubiquinone oxidoreductase [Morus notabilis]	-	-	-	-
UNIGENE0001757	ID_912	10	--	-	-	-	-
UNIGENE0001760	ID_913	21	PREDICTED: AP2-like ethylene-responsive transcription factor At1g16060 isoform X2 [Cucumis melo]	-	-	GO:0005488//binding;GO:0003676//nucleic acid binding;GO:1901363//heterocyclic compound binding;GO:0001071//nucleic acid binding transcription factor activity;GO:0097159//organic cyclic compound binding	GO:0019222//regulation of metabolic process;GO:0010468//regulation of gene expression;GO:0060255//regulation of macromolecule metabolic process;GO:0050789//regulation of biological process;GO:0065007//biological regulation
UNIGENE0001767	ID_914	12	--	-	-	-	-
UNIGENE0001768	ID_915	12	PREDICTED: LOB domain-containing protein 4 [Cucumis sativus]	-	GO:0043229//intracellular organelle;GO:0043226//organelle;GO:0005623//cell;GO:0044424//intracellular part;GO:0005622//intracellular;GO:0043227//membrane-bounded organelle;GO:0044464//cell part;GO:0043231//intracellular membrane-bounded organelle	-	GO:0008152//metabolic process;GO:0010087//phloem or xylem histogenesis;GO:0009888//tissue development;GO:0071704//organic substance metabolic process;GO:0044237//cellular metabolic process;GO:0048856//anatomical structure development;GO:0032502//developmental process;GO:0043170//macromolecule metabolic process;GO:0044260//cellular macromolecule metabolic process;GO:0009987//cellular process
UNIGENE0001770	ID_916	17	PREDICTED: zinc finger CCCH domain-containing protein 15-like isoform X1 [Cucumis melo]	-	-	GO:0043167//ion binding;GO:0043169//cation binding;GO:0005488//binding	-
UNIGENE0001772	ID_917	12	--	-	-	-	-
UNIGENE0001773	ID_918	9	--	-	-	-	-
UNIGENE0001775	ID_919	17	BnaC02g15130D [Brassica napus]	-	-	-	-
UNIGENE0001777	ID_920	21	--	-	-	-	-
UNIGENE0001778	ID_921	5	PREDICTED: LOW QUALITY PROTEIN: probable L-type lectin-domain containing receptor kinase VII.2 [Cucumis melo]	-	GO:0016020//membrane	GO:0005488//binding;GO:0003824//catalytic activity;GO:0001883//purine nucleoside binding;GO:0016301//kinase activity;GO:0001882//nucleoside binding;GO:0032549//ribonucleoside binding;GO:0097367//carbohydrate derivative binding;GO:0097159//organic cyclic compound binding;GO:1901363//heterocyclic compound binding;GO:0036094//small molecule binding;GO:0032550//purine ribonucleoside binding;GO:001677…	GO:0043412//macromolecule modification;GO:0019538//protein metabolic process;GO:0009987//cellular process;GO:0006796//phosphate-containing compound metabolic process;GO:0043170//macromolecule metabolic process;GO:0016310//phosphorylation;GO:0006464//cellular protein modification process;GO:0044260//cellular macromolecule metabolic process;GO:0044267//cellular protein metabolic process;GO:0044237/…
UNIGENE0001780	ID_922	4	ABC transporter C family member 10 [Aegilops tauschii]	-	-	GO:0017111//nucleoside-triphosphatase activity;GO:1901363//heterocyclic compound binding;GO:0016817//hydrolase activity, acting on acid anhydrides;GO:0097159//organic cyclic compound binding;GO:0003824//catalytic activity;GO:0016787//hydrolase activity;GO:0016462//pyrophosphatase activity;GO:0005488//binding;GO:0016818//hydrolase activity, acting on acid anhydrides, in phosphorus-containing anhyd…	GO:0009987//cellular process;GO:0051179//localization;GO:0008152//metabolic process;GO:0044699//single-organism process;GO:0051234//establishment of localization
UNIGENE0001781	ID_923	20	--	-	-	-	-
UNIGENE0001785	ID_924	12	--	-	-	-	-
UNIGENE0001786	ID_925	7	--	-	-	-	-
UNIGENE0001787	ID_926	3	PREDICTED: BTB/POZ domain-containing protein At1g04390 isoform X2 [Cucumis sativus]	-	-	-	-
UNIGENE0001791	ID_927	10	--	-	-	-	-
UNIGENE0001792	ID_928	7	--	-	-	-	-
UNIGENE0001795	ID_929	16	PREDICTED: peroxidase 2-like [Cucumis melo]	ko00940//Phenylpropanoid biosynthesis//Biosynthesis of other secondary metabolites//Metabolism	-	GO:0005488//binding;GO:0046906//tetrapyrrole binding;GO:0016209//antioxidant activity;GO:0097159//organic cyclic compound binding;GO:1901363//heterocyclic compound binding;GO:0003824//catalytic activity	GO:0044710//single-organism metabolic process;GO:0006950//response to stress;GO:0050896//response to stimulus;GO:0008152//metabolic process;GO:0044699//single-organism process
UNIGENE0001796	ID_930	21	PREDICTED: peroxidase 2-like [Cucumis sativus]	ko00940//Phenylpropanoid biosynthesis//Biosynthesis of other secondary metabolites//Metabolism	-	GO:0046906//tetrapyrrole binding;GO:0005488//binding;GO:1901363//heterocyclic compound binding;GO:0016209//antioxidant activity;GO:0003824//catalytic activity;GO:0097159//organic cyclic compound binding	GO:0044699//single-organism process;GO:0050896//response to stimulus;GO:0006950//response to stress;GO:0044710//single-organism metabolic process;GO:0008152//metabolic process
UNIGENE0001798	ID_931	4	Thioesterase superfamily protein [Theobroma cacao]	-	-	-	-
UNIGENE0001799	ID_932	12	hypothetical protein VITISV_041690 [Vitis vinifera]	-	-	-	-
UNIGENE0001800	ID_933	6	--	-	-	-	-
UNIGENE0001802	ID_934	19	BnaA07g31240D [Brassica napus]	-	-	GO:0005198//structural molecule activity	GO:0045229//external encapsulating structure organization;GO:0071555//cell wall organization;GO:0071840//cellular component organization or biogenesis;GO:0009987//cellular process;GO:0016043//cellular component organization;GO:0071554//cell wall organization or biogenesis
UNIGENE0001803	ID_935	0	--	-	-	-	-
UNIGENE0001816	ID_936	6	--	-	-	-	-
UNIGENE0001819	ID_937	3	--	-	-	-	-
UNIGENE0001822	ID_938	21	PREDICTED: uncharacterized protein LOC103487913 [Cucumis melo]	-	-	-	-
UNIGENE0001823	ID_939	21	PREDICTED: WAT1-related protein At4g15540-like isoform X2 [Cucumis melo]	-	GO:0031224//intrinsic component of membrane;GO:0016020//membrane;GO:0044425//membrane part	GO:0005215//transporter activity	GO:0009987//cellular process;GO:0044699//single-organism process;GO:0044763//single-organism cellular process
UNIGENE0001825	ID_940	12	--	-	-	-	-
UNIGENE0001826	ID_941	17	Polynucleotidyl transferase, Ribonuclease H fold [Medicago truncatula]	ko03420//Nucleotide excision repair//Replication and repair//Genetic Information Processing;ko03030//DNA replication//Replication and repair//Genetic Information Processing;ko03440//Homologous recombination//Replication and repair//Genetic Information Processing;ko03430//Mismatch repair//Replication and repair//Genetic Information Processing	-	-	-
UNIGENE0001827	ID_942	21	Ribonuclease H-like superfamily protein [Theobroma cacao]	-	-	-	-
UNIGENE0001829	ID_943	18	PREDICTED: probable inorganic phosphate transporter 1-9 [Cucumis sativus]	-	GO:0044425//membrane part;GO:0031224//intrinsic component of membrane;GO:0016020//membrane	GO:0005215//transporter activity	GO:0044699//single-organism process;GO:0009987//cellular process;GO:0044763//single-organism cellular process
UNIGENE0001830	ID_944	16	PREDICTED: phosphoenolpyruvate carboxykinase [ATP]-like [Cucumis melo]	ko01200//Carbon metabolism//Global and Overview//Metabolism;ko00010//Glycolysis / Gluconeogenesis//Carbohydrate metabolism//Metabolism;ko00620//Pyruvate metabolism//Carbohydrate metabolism//Metabolism;ko00710//Carbon fixation in photosynthetic organisms//Energy metabolism//Metabolism;ko00020//Citrate cycle (TCA cycle)//Carbohydrate metabolism//Metabolism	-	GO:0003824//catalytic activity;GO:0036094//small molecule binding;GO:0016772//transferase activity, transferring phosphorus-containing groups;GO:0016829//lyase activity;GO:0004611//phosphoenolpyruvate carboxykinase activity;GO:0097367//carbohydrate derivative binding;GO:0097159//organic cyclic compound binding;GO:0016831//carboxy-lyase activity;GO:0005488//binding;GO:0000166//nucleotide binding;G…	GO:0006793//phosphorus metabolic process;GO:0071704//organic substance metabolic process;GO:0044237//cellular metabolic process;GO:0044699//single-organism process;GO:0006796//phosphate-containing compound metabolic process;GO:0044723//single-organism carbohydrate metabolic process;GO:0044710//single-organism metabolic process;GO:0009987//cellular process;GO:0005975//carbohydrate metabolic proces…
UNIGENE0001831	ID_945	16	PREDICTED: phosphoenolpyruvate carboxykinase [ATP]-like [Cucumis melo]	ko01200//Carbon metabolism//Global and Overview//Metabolism;ko00010//Glycolysis / Gluconeogenesis//Carbohydrate metabolism//Metabolism;ko00620//Pyruvate metabolism//Carbohydrate metabolism//Metabolism;ko00710//Carbon fixation in photosynthetic organisms//Energy metabolism//Metabolism;ko00020//Citrate cycle (TCA cycle)//Carbohydrate metabolism//Metabolism	-	GO:0001882//nucleoside binding;GO:0016829//lyase activity;GO:1901363//heterocyclic compound binding;GO:0001883//purine nucleoside binding;GO:0097367//carbohydrate derivative binding;GO:0032550//purine ribonucleoside binding;GO:0016831//carboxy-lyase activity;GO:0036094//small molecule binding;GO:0000166//nucleotide binding;GO:0016830//carbon-carbon lyase activity;GO:0032549//ribonucleoside bindin…	GO:0044699//single-organism process;GO:0044237//cellular metabolic process;GO:0006006//glucose metabolic process;GO:0005975//carbohydrate metabolic process;GO:0044238//primary metabolic process;GO:0009987//cellular process;GO:0005996//monosaccharide metabolic process;GO:0006793//phosphorus metabolic process;GO:0044710//single-organism metabolic process;GO:0019318//hexose metabolic process;GO:0008…
UNIGENE0001832	ID_946	14	PREDICTED: bax inhibitor 1-like [Cucumis melo]	-	GO:0044425//membrane part;GO:0016020//membrane;GO:0031224//intrinsic component of membrane	-	GO:0010941//regulation of cell death;GO:0065007//biological regulation;GO:0050794//regulation of cellular process;GO:0043067//regulation of programmed cell death;GO:0050789//regulation of biological process;GO:0042981//regulation of apoptotic process
UNIGENE0001834	ID_947	2	--	-	-	-	-
UNIGENE0001836	ID_948	3	--	-	-	-	-
UNIGENE0001841	ID_949	13	ribonuclease (RNase LC1) [Luffa aegyptiaca]	-	-	GO:0004518//nuclease activity;GO:0016787//hydrolase activity;GO:0003824//catalytic activity;GO:0097159//organic cyclic compound binding;GO:0005488//binding;GO:0004540//ribonuclease activity;GO:0004519//endonuclease activity;GO:0004521//endoribonuclease activity;GO:0016894//endonuclease activity, active with either ribo- or deoxyribonucleic acids and producing 3'-phosphomonoesters;GO:0016788//hydr…	GO:0008152//metabolic process;GO:0090501//RNA phosphodiester bond hydrolysis;GO:0009987//cellular process;GO:0006725//cellular aromatic compound metabolic process;GO:0071704//organic substance metabolic process;GO:0043170//macromolecule metabolic process;GO:0090305//nucleic acid phosphodiester bond hydrolysis;GO:0006807//nitrogen compound metabolic process;GO:0034641//cellular nitrogen compound m…
UNIGENE0001842	ID_950	5	--	-	-	-	-
UNIGENE0001843	ID_951	8	PREDICTED: programmed cell death protein 4-like [Gossypium raimondii]	-	-	-	-
UNIGENE0001844	ID_952	3	hypothetical protein VITISV_029284 [Vitis vinifera]	-	-	-	-
UNIGENE0001847	ID_953	6	PREDICTED: replication factor C subunit 3 [Cucumis melo]	ko03420//Nucleotide excision repair//Replication and repair//Genetic Information Processing;ko03030//DNA replication//Replication and repair//Genetic Information Processing;ko03430//Mismatch repair//Replication and repair//Genetic Information Processing	GO:0005622//intracellular;GO:0043227//membrane-bounded organelle;GO:0043226//organelle;GO:0043229//intracellular organelle;GO:0044424//intracellular part;GO:0043231//intracellular membrane-bounded organelle;GO:0005623//cell;GO:0044464//cell part	GO:0032550//purine ribonucleoside binding;GO:0001882//nucleoside binding;GO:0016818//hydrolase activity, acting on acid anhydrides, in phosphorus-containing anhydrides;GO:0016787//hydrolase activity;GO:0016462//pyrophosphatase activity;GO:0003676//nucleic acid binding;GO:0097159//organic cyclic compound binding;GO:0005488//binding;GO:0001883//purine nucleoside binding;GO:1901363//heterocyclic com…	GO:1901360//organic cyclic compound metabolic process;GO:0044249//cellular biosynthetic process;GO:0006807//nitrogen compound metabolic process;GO:0009058//biosynthetic process;GO:0009987//cellular process;GO:0044238//primary metabolic process;GO:0006139//nucleobase-containing compound metabolic process;GO:0044260//cellular macromolecule metabolic process;GO:0034641//cellular nitrogen compound me…
UNIGENE0001851	ID_954	1	PREDICTED: beta-adducin [Cucumis melo]	-	-	-	-
UNIGENE0001852	ID_955	20	--	-	-	-	-
UNIGENE0001853	ID_956	6	PREDICTED: arginine/serine-rich protein 45 [Cucumis melo]	ko03013//RNA transport//Translation//Genetic Information Processing;ko03015//mRNA surveillance pathway//Translation//Genetic Information Processing	-	GO:0005488//binding;GO:0097159//organic cyclic compound binding;GO:0036094//small molecule binding	-
UNIGENE0001855	ID_957	12	PREDICTED: RNA-binding protein 34 [Cucumis melo]	-	-	GO:0036094//small molecule binding;GO:0005488//binding;GO:0097159//organic cyclic compound binding	-
UNIGENE0001857	ID_958	3	--	-	-	-	-
UNIGENE0001860	ID_959	12	--	-	-	-	-
UNIGENE0001861	ID_960	17	PREDICTED: protein ODORANT1-like [Cucumis sativus]	-	-	GO:1901363//heterocyclic compound binding;GO:0005488//binding;GO:0003676//nucleic acid binding;GO:0097159//organic cyclic compound binding	-
UNIGENE0001863	ID_961	7	--	-	-	-	-
UNIGENE0001864	ID_962	20	PREDICTED: TMV resistance protein N-like [Cucumis sativus]	-	-	-	-
UNIGENE0001866	ID_963	9	--	-	-	-	-
UNIGENE0001867	ID_964	1	--	-	-	-	-
UNIGENE0001869	ID_965	10	--	-	-	-	-
UNIGENE0001874	ID_966	12	--	-	-	-	-
UNIGENE0001876	ID_967	15	PREDICTED: translationally-controlled tumor protein homolog [Cucumis melo]	-	GO:0005623//cell;GO:0044464//cell part;GO:0005622//intracellular;GO:0044424//intracellular part	-	-
UNIGENE0001877	ID_968	12	--	-	-	-	-
UNIGENE0001878	ID_969	16	hypothetical protein Csa_3G164540 [Cucumis sativus]	-	-	-	-
UNIGENE0001881	ID_970	12	PREDICTED: CSC1-like protein ERD4 [Populus euphratica]	-	-	-	-
UNIGENE0001884	ID_971	6	--	-	-	-	-
UNIGENE0001885	ID_972	0	PREDICTED: proline-rich receptor-like protein kinase PERK13 [Cucumis sativus]	-	-	GO:0097159//organic cyclic compound binding;GO:0016773//phosphotransferase activity, alcohol group as acceptor;GO:0016301//kinase activity;GO:1901363//heterocyclic compound binding;GO:0016740//transferase activity;GO:0036094//small molecule binding;GO:0003824//catalytic activity;GO:0016772//transferase activity, transferring phosphorus-containing groups;GO:0004672//protein kinase activity;GO:0005…	GO:0006793//phosphorus metabolic process;GO:0044237//cellular metabolic process;GO:0008152//metabolic process;GO:0009987//cellular process;GO:0006796//phosphate-containing compound metabolic process
UNIGENE0001886	ID_973	4	--	-	-	-	-
UNIGENE0001887	ID_974	14	--	-	-	-	-
UNIGENE0001888	ID_975	12	--	-	-	-	-
UNIGENE0001890	ID_976	21	PREDICTED: DNA-directed RNA polymerase III subunit RPC6-like [Cucumis melo]	ko00230//Purine metabolism//Nucleotide metabolism//Metabolism;ko00240//Pyrimidine metabolism//Nucleotide metabolism//Metabolism;ko03020//RNA polymerase//Transcription//Genetic Information Processing	-	GO:0016779//nucleotidyltransferase activity;GO:0005488//binding;GO:1901363//heterocyclic compound binding;GO:0097159//organic cyclic compound binding;GO:0034062//RNA polymerase activity;GO:0003824//catalytic activity;GO:0016740//transferase activity;GO:0016772//transferase activity, transferring phosphorus-containing groups;GO:0003676//nucleic acid binding	GO:0034645//cellular macromolecule biosynthetic process;GO:0009058//biosynthetic process;GO:0008152//metabolic process;GO:0071704//organic substance metabolic process;GO:0044249//cellular biosynthetic process;GO:0044260//cellular macromolecule metabolic process;GO:0009059//macromolecule biosynthetic process;GO:0043170//macromolecule metabolic process;GO:0044237//cellular metabolic process;GO:0009…
UNIGENE0001891	ID_977	25	PREDICTED: oleosin 18.2 kDa-like [Cucumis melo]	-	GO:0043226//organelle;GO:0044464//cell part;GO:0043228//non-membrane-bounded organelle;GO:0043232//intracellular non-membrane-bounded organelle;GO:0005811//lipid particle;GO:0005623//cell;GO:0044424//intracellular part;GO:0031224//intrinsic component of membrane;GO:0043229//intracellular organelle;GO:0016020//membrane;GO:0044425//membrane part;GO:0005622//intracellular	-	-
UNIGENE0001894	ID_978	12	--	-	-	-	-
UNIGENE0001896	ID_979	21	--	-	-	-	-
UNIGENE0001897	ID_980	7	--	-	-	-	-
UNIGENE0001899	ID_981	1	--	-	-	-	-
UNIGENE0001901	ID_982	3	--	-	-	-	-
UNIGENE0001905	ID_983	15	PREDICTED: protein NRT1/ PTR FAMILY 5.2 [Cucumis sativus]	-	-	-	GO:0051234//establishment of localization;GO:0051179//localization
UNIGENE0001913	ID_984	9	--	-	-	-	-
UNIGENE0001914	ID_985	4	--	-	-	-	-
UNIGENE0001915	ID_986	12	hypothetical protein VITISV_042223 [Vitis vinifera]	-	-	GO:0005488//binding	-
UNIGENE0001918	ID_987	5	PREDICTED: nuclear pore complex protein NUP214 isoform X1 [Cucumis sativus]	ko03013//RNA transport//Translation//Genetic Information Processing	-	-	-
UNIGENE0001919	ID_988	21	PREDICTED: palmitoyl-monogalactosyldiacylglycerol delta-7 desaturase, chloroplastic-like [Cucumis sativus]	ko01212//Fatty acid metabolism//Global and Overview//Metabolism;ko01040//Biosynthesis of unsaturated fatty acids//Lipid metabolism//Metabolism	GO:0031224//intrinsic component of membrane;GO:0043231//intracellular membrane-bounded organelle;GO:0043226//organelle;GO:0005737//cytoplasm;GO:0044424//intracellular part;GO:0044435//plastid part;GO:0009526//plastid envelope;GO:0044464//cell part;GO:0042170//plastid membrane;GO:0005623//cell;GO:0044422//organelle part;GO:0031090//organelle membrane;GO:0043229//intracellular organelle;GO:0016020/…	GO:0003824//catalytic activity;GO:0016705//oxidoreductase activity, acting on paired donors, with incorporation or reduction of molecular oxygen;GO:0016491//oxidoreductase activity	GO:0071704//organic substance metabolic process;GO:0019637//organophosphate metabolic process;GO:0009628//response to abiotic stimulus;GO:0006778//porphyrin-containing compound metabolic process;GO:0044763//single-organism cellular process;GO:0016108//tetraterpenoid metabolic process;GO:0008299//isoprenoid biosynthetic process;GO:0044271//cellular nitrogen compound biosynthetic process;GO:0006090…
UNIGENE0001921	ID_989	21	PREDICTED: nodulation-signaling pathway 1 protein [Cucumis sativus]	-	-	-	-
UNIGENE0001923	ID_990	14	--	-	-	-	-
UNIGENE0001926	ID_991	0	PREDICTED: glucan endo-1,3-beta-glucosidase 2 [Cucumis sativus]	-	GO:0031224//intrinsic component of membrane;GO:0031225//anchored component of membrane;GO:0016020//membrane;GO:0044425//membrane part	GO:0016798//hydrolase activity, acting on glycosyl bonds;GO:0008422//beta-glucosidase activity;GO:0015926//glucosidase activity;GO:0004553//hydrolase activity, hydrolyzing O-glycosyl compounds;GO:0003824//catalytic activity;GO:0016787//hydrolase activity	GO:0044238//primary metabolic process;GO:0008152//metabolic process;GO:0050896//response to stimulus;GO:0006950//response to stress
UNIGENE0001927	ID_992	0	PREDICTED: glucan endo-1,3-beta-glucosidase 2 [Cucumis sativus]	-	GO:0031225//anchored component of membrane;GO:0044425//membrane part;GO:0031224//intrinsic component of membrane;GO:0016020//membrane	GO:0015926//glucosidase activity;GO:0016787//hydrolase activity;GO:0004553//hydrolase activity, hydrolyzing O-glycosyl compounds;GO:0016798//hydrolase activity, acting on glycosyl bonds;GO:0008422//beta-glucosidase activity;GO:0003824//catalytic activity	GO:0050896//response to stimulus;GO:0006950//response to stress;GO:0044238//primary metabolic process;GO:0008152//metabolic process
UNIGENE0001928	ID_993	9	--	-	-	-	-
UNIGENE0001929	ID_994	11	PREDICTED: vacuolar protein sorting-associated protein 4 isoform X1 [Vitis vinifera]	ko04144//Endocytosis//Transport and catabolism//Cellular Processes	GO:0043226//organelle;GO:0005770//late endosome;GO:0012505//endomembrane system;GO:0044444//cytoplasmic part;GO:0043227//membrane-bounded organelle;GO:0005911//cell-cell junction;GO:0005768//endosome;GO:0044424//intracellular part;GO:0005622//intracellular;GO:0030054//cell junction;GO:0043231//intracellular membrane-bounded organelle;GO:0005737//cytoplasm;GO:0043229//intracellular organelle;GO:00…	GO:0016818//hydrolase activity, acting on acid anhydrides, in phosphorus-containing anhydrides;GO:0001883//purine nucleoside binding;GO:0032550//purine ribonucleoside binding;GO:0097159//organic cyclic compound binding;GO:0016462//pyrophosphatase activity;GO:0032549//ribonucleoside binding;GO:0003824//catalytic activity;GO:0036094//small molecule binding;GO:1901363//heterocyclic compound binding;…	GO:0032989//cellular component morphogenesis;GO:0070727//cellular macromolecule localization;GO:0007031//peroxisome organization;GO:0016054//organic acid catabolic process;GO:0044282//small molecule catabolic process;GO:0051179//localization;GO:1902582//single-organism intracellular transport;GO:0009062//fatty acid catabolic process;GO:0043574//peroxisomal transport;GO:0071704//organic substance …
UNIGENE0001930	ID_995	12	PREDICTED: uncharacterized LOC100382843 isoform X1 [Zea mays]	-	-	-	-
UNIGENE0001933	ID_996	4	--	-	-	-	-
UNIGENE0001934	ID_997	14	--	-	-	-	-
UNIGENE0001935	ID_998	1	F5O11.10 isoform 1 [Theobroma cacao]	-	-	GO:0005488//binding;GO:0097159//organic cyclic compound binding	-
UNIGENE0001936	ID_999	22	PREDICTED: tetrahydrocannabinolic acid synthase-like [Cucumis melo]	-	-	GO:0003824//catalytic activity;GO:0016614//oxidoreductase activity, acting on CH-OH group of donors;GO:0005488//binding;GO:0097159//organic cyclic compound binding;GO:0016616//oxidoreductase activity, acting on the CH-OH group of donors, NAD or NADP as acceptor;GO:0046992//oxidoreductase activity, acting on X-H and Y-H to form an X-Y bond;GO:1901265//nucleoside phosphate binding;GO:0046993//oxido…	GO:0044710//single-organism metabolic process;GO:0008152//metabolic process;GO:0044699//single-organism process
UNIGENE0001937	ID_1000	16	PREDICTED: tetrahydrocannabinolic acid synthase-like [Cucumis melo]	-	-	GO:1901265//nucleoside phosphate binding;GO:0097159//organic cyclic compound binding;GO:0016614//oxidoreductase activity, acting on CH-OH group of donors;GO:1901363//heterocyclic compound binding;GO:0003824//catalytic activity;GO:0016616//oxidoreductase activity, acting on the CH-OH group of donors, NAD or NADP as acceptor;GO:0000166//nucleotide binding;GO:0005488//binding;GO:0036094//small molec…	GO:0008152//metabolic process;GO:0044710//single-organism metabolic process;GO:0044699//single-organism process
UNIGENE0001938	ID_1001	4	PREDICTED: arabinogalactan peptide 20 [Cucumis sativus]	-	-	-	-
UNIGENE0001940	ID_1002	7	--	-	-	-	-
UNIGENE0001942	ID_1003	6	--	-	-	-	-
UNIGENE0001947	ID_1004	23	PREDICTED: pentatricopeptide repeat-containing protein At1g53600, mitochondrial [Cucumis melo]	-	-	-	-
UNIGENE0001948	ID_1005	23	PREDICTED: pentatricopeptide repeat-containing protein At1g53600, mitochondrial [Cucumis melo]	-	GO:0005623//cell;GO:0043226//organelle;GO:0043231//intracellular membrane-bounded organelle;GO:0043227//membrane-bounded organelle;GO:0043229//intracellular organelle;GO:0044424//intracellular part;GO:0005622//intracellular;GO:0044464//cell part	GO:0042623//ATPase activity, coupled;GO:0016817//hydrolase activity, acting on acid anhydrides;GO:0016462//pyrophosphatase activity;GO:0003824//catalytic activity;GO:0016787//hydrolase activity;GO:0017111//nucleoside-triphosphatase activity;GO:0016887//ATPase activity;GO:0016818//hydrolase activity, acting on acid anhydrides, in phosphorus-containing anhydrides	-
UNIGENE0001949	ID_1006	6	--	-	-	-	-
UNIGENE0001950	ID_1007	6	--	-	-	-	-
UNIGENE0001954	ID_1008	3	--	-	-	-	-
UNIGENE0001955	ID_1009	14	PREDICTED: syntaxin-132-like isoform X1 [Cucumis melo]	ko04130//SNARE interactions in vesicular transport//Folding, sorting and degradation//Genetic Information Processing	-	-	GO:0051234//establishment of localization;GO:0006810//transport;GO:0051179//localization
UNIGENE0001956	ID_1010	14	PREDICTED: syntaxin-132-like isoform X1 [Cucumis melo]	ko04130//SNARE interactions in vesicular transport//Folding, sorting and degradation//Genetic Information Processing	-	-	GO:0006810//transport;GO:0051234//establishment of localization;GO:0051179//localization
UNIGENE0001957	ID_1011	12	--	-	-	-	-
UNIGENE0001958	ID_1012	15	TE3 [Humulus lupulus]	-	-	-	-
UNIGENE0001960	ID_1013	8	pore-forming toxin-like protein Hfr-2 [Triticum aestivum]	-	-	-	-
UNIGENE0001961	ID_1014	3	--	-	-	-	-
UNIGENE0001962	ID_1015	10	PREDICTED: BON1-associated protein 2-like [Cucumis sativus]	-	-	-	-
UNIGENE0001963	ID_1016	10	PREDICTED: probable WRKY transcription factor 51 [Cucumis sativus]	-	-	GO:0005488//binding;GO:0003676//nucleic acid binding;GO:1901363//heterocyclic compound binding;GO:0001071//nucleic acid binding transcription factor activity;GO:0097159//organic cyclic compound binding;GO:0003677//DNA binding	GO:0019222//regulation of metabolic process;GO:0065007//biological regulation;GO:0050896//response to stimulus;GO:0050789//regulation of biological process;GO:0009987//cellular process;GO:0010468//regulation of gene expression;GO:0060255//regulation of macromolecule metabolic process
UNIGENE0001966	ID_1017	12	--	-	-	-	-
UNIGENE0001969	ID_1018	20	PREDICTED: probable LRR receptor-like serine/threonine-protein kinase At4g37250 [Cucumis sativus]	-	-	GO:0016772//transferase activity, transferring phosphorus-containing groups;GO:0003824//catalytic activity;GO:0016740//transferase activity	-
UNIGENE0001973	ID_1019	10	--	-	-	-	-
UNIGENE0001974	ID_1020	23	--	-	-	-	-
UNIGENE0001977	ID_1021	15	PREDICTED: kinetochore protein NDC80 homolog [Cucumis sativus]	-	-	-	GO:0000003//reproduction;GO:0048367//shoot system development;GO:0048444//floral organ morphogenesis;GO:0008152//metabolic process;GO:0051276//chromosome organization;GO:0006996//organelle organization;GO:0048285//organelle fission;GO:0051321//meiotic cell cycle;GO:0048563//post-embryonic organ morphogenesis;GO:0065007//biological regulation;GO:0046483//heterocycle metabolic process;GO:0044260//c…
UNIGENE0001978	ID_1022	12	--	-	-	-	-
UNIGENE0001980	ID_1023	20	acetyltransferase (GNAT) domain protein [Medicago truncatula]	-	-	GO:0016740//transferase activity;GO:0034212//peptide N-acetyltransferase activity;GO:0016410//N-acyltransferase activity;GO:0016747//transferase activity, transferring acyl groups other than amino-acyl groups;GO:0016746//transferase activity, transferring acyl groups;GO:0008080//N-acetyltransferase activity;GO:0016407//acetyltransferase activity;GO:0004596//peptide alpha-N-acetyltransferase activ…	-
UNIGENE0001981	ID_1024	21	--	-	-	-	-
UNIGENE0001982	ID_1025	9	PREDICTED: protein trichome birefringence-like 31 [Cucumis melo]	-	-	-	-
UNIGENE0001983	ID_1026	23	PREDICTED: pentatricopeptide repeat-containing protein At5g66520 [Cucumis melo]	-	-	-	GO:0043170//macromolecule metabolic process;GO:0016070//RNA metabolic process;GO:0034641//cellular nitrogen compound metabolic process;GO:0006725//cellular aromatic compound metabolic process;GO:0046483//heterocycle metabolic process;GO:1901360//organic cyclic compound metabolic process;GO:0006807//nitrogen compound metabolic process;GO:0009451//RNA modification;GO:0008152//metabolic process;GO:0…
UNIGENE0001984	ID_1027	7	PREDICTED: pentatricopeptide repeat-containing protein At5g66520 [Cucumis melo]	-	-	GO:0016787//hydrolase activity;GO:0003824//catalytic activity	GO:0006725//cellular aromatic compound metabolic process;GO:0009451//RNA modification;GO:0046483//heterocycle metabolic process;GO:0044238//primary metabolic process;GO:0016070//RNA metabolic process;GO:0006807//nitrogen compound metabolic process;GO:0034641//cellular nitrogen compound metabolic process;GO:1901360//organic cyclic compound metabolic process;GO:0090304//nucleic acid metabolic proce…
UNIGENE0001986	ID_1028	6	--	-	-	-	-
UNIGENE0001987	ID_1029	12	--	-	-	-	-
UNIGENE0001988	ID_1030	11	--	-	-	-	-
UNIGENE0001990	ID_1031	10	Calcium-transporting ATPase 3, endoplasmic reticulum-type [Glycine soja]	-	-	-	-
UNIGENE0001991	ID_1032	4	--	-	-	-	-
UNIGENE0001992	ID_1033	12	F-box family protein [Medicago truncatula]	-	-	-	-
UNIGENE0001993	ID_1034	11	conserved hypothetical protein [Ricinus communis]	-	-	-	-
UNIGENE0001994	ID_1035	1	PREDICTED: ABC transporter G family member 17-like [Cucumis sativus]	-	-	GO:0016817//hydrolase activity, acting on acid anhydrides;GO:0001882//nucleoside binding;GO:0016818//hydrolase activity, acting on acid anhydrides, in phosphorus-containing anhydrides;GO:0032549//ribonucleoside binding;GO:0097159//organic cyclic compound binding;GO:0097367//carbohydrate derivative binding;GO:0016462//pyrophosphatase activity;GO:0016787//hydrolase activity;GO:0005488//binding;GO:0…	-
UNIGENE0001995	ID_1036	5	PREDICTED: ABC transporter G family member 17-like [Jatropha curcas]	-	-	GO:0019829//cation-transporting ATPase activity;GO:0032549//ribonucleoside binding;GO:0022857//transmembrane transporter activity;GO:0042626//ATPase activity, coupled to transmembrane movement of substances;GO:0015405//P-P-bond-hydrolysis-driven transmembrane transporter activity;GO:0015399//primary active transmembrane transporter activity;GO:0015075//ion transmembrane transporter activity;GO:00…	GO:0044765//single-organism transport;GO:0051234//establishment of localization;GO:0000041//transition metal ion transport;GO:0044699//single-organism process;GO:0006812//cation transport;GO:0051179//localization;GO:0030001//metal ion transport;GO:0006811//ion transport;GO:0006810//transport;GO:0006826//iron ion transport;GO:1902578//single-organism localization
UNIGENE0001997	ID_1037	21	PREDICTED: zinc finger protein ZAT10 [Cucumis sativus]	-	-	GO:0005488//binding	-
UNIGENE0001999	ID_1038	6	Adenosine monophosphate-protein transferase and cysteine protease ibpA [Gossypium arboreum]	-	-	-	-
UNIGENE0002001	ID_1039	6	PREDICTED: proline-rich receptor-like protein kinase PERK4 [Nelumbo nucifera]	-	-	-	-
UNIGENE0002005	ID_1040	15	--	-	-	-	-
UNIGENE0002010	ID_1041	3	--	-	-	-	-
UNIGENE0002011	ID_1042	3	--	-	-	-	-
UNIGENE0002018	ID_1043	11	--	-	-	-	-
UNIGENE0002019	ID_1044	9	PREDICTED: glucan endo-1,3-beta-glucosidase 8 [Cucumis melo]	-	GO:0044424//intracellular part;GO:0043231//intracellular membrane-bounded organelle;GO:0044464//cell part;GO:0005623//cell;GO:0044422//organelle part;GO:0044429//mitochondrial part;GO:0044425//membrane part;GO:0044444//cytoplasmic part;GO:0043229//intracellular organelle;GO:0016020//membrane;GO:0005622//intracellular;GO:0005739//mitochondrion;GO:0031224//intrinsic component of membrane;GO:0043226…	GO:0008422//beta-glucosidase activity;GO:0008168//methyltransferase activity;GO:0008757//S-adenosylmethionine-dependent methyltransferase activity;GO:0003824//catalytic activity;GO:0016423//tRNA (guanine) methyltransferase activity;GO:0009019//tRNA (guanine-N1-)-methyltransferase activity;GO:0016787//hydrolase activity;GO:0008173//RNA methyltransferase activity;GO:0015926//glucosidase activity;GO…	GO:0034641//cellular nitrogen compound metabolic process;GO:0006139//nucleobase-containing compound metabolic process;GO:0009451//RNA modification;GO:0071704//organic substance metabolic process;GO:0001510//RNA methylation;GO:0046483//heterocycle metabolic process;GO:0006725//cellular aromatic compound metabolic process;GO:0044237//cellular metabolic process;GO:0006807//nitrogen compound metaboli…
UNIGENE0002020	ID_1045	18	--	-	-	-	-
UNIGENE0002021	ID_1046	12	--	-	-	-	-
UNIGENE0002022	ID_1047	12	--	-	-	-	-
UNIGENE0002024	ID_1048	12	--	-	-	-	-
UNIGENE0002028	ID_1049	7	--	-	-	-	-
UNIGENE0002029	ID_1050	12	--	-	-	-	-
UNIGENE0002030	ID_1051	25	PREDICTED: protein CHROMATIN REMODELING 25 [Cucumis sativus]	ko03440//Homologous recombination//Replication and repair//Genetic Information Processing	-	GO:0005488//binding;GO:0032549//ribonucleoside binding;GO:0016462//pyrophosphatase activity;GO:0001882//nucleoside binding;GO:0097159//organic cyclic compound binding;GO:1901363//heterocyclic compound binding;GO:0097367//carbohydrate derivative binding;GO:0003824//catalytic activity;GO:0017111//nucleoside-triphosphatase activity;GO:0016787//hydrolase activity;GO:0003676//nucleic acid binding;GO:0…	GO:2001141//regulation of RNA biosynthetic process;GO:0050896//response to stimulus;GO:0000724//double-strand break repair via homologous recombination;GO:0032502//developmental process;GO:0031323//regulation of cellular metabolic process;GO:1902589//single-organism organelle organization;GO:0032200//telomere organization;GO:0000003//reproduction;GO:1903046//meiotic cell cycle process;GO:0019538/…
UNIGENE0002033	ID_1052	12	PREDICTED: RNA-binding protein 39 isoform X3 [Cucumis melo]	-	-	-	-
UNIGENE0002034	ID_1053	12	PREDICTED: RNA-binding protein 39 isoform X3 [Cucumis melo]	-	-	-	-
UNIGENE0002037	ID_1054	0	BnaC03g45630D [Brassica napus]	-	-	-	-
UNIGENE0002039	ID_1055	12	--	-	-	-	-
UNIGENE0002041	ID_1056	6	--	-	-	-	-
UNIGENE0002043	ID_1057	11	disease resistance protein [Brassica rapa subsp. pekinensis]	-	GO:0043231//intracellular membrane-bounded organelle;GO:0043226//organelle;GO:0005622//intracellular;GO:0044464//cell part;GO:0005623//cell;GO:0044424//intracellular part;GO:0043227//membrane-bounded organelle;GO:0043229//intracellular organelle	GO:0097367//carbohydrate derivative binding;GO:0005488//binding;GO:0043169//cation binding;GO:0003824//catalytic activity;GO:0032550//purine ribonucleoside binding;GO:0001883//purine nucleoside binding;GO:0070011//peptidase activity, acting on L-amino acid peptides;GO:0004175//endopeptidase activity;GO:1901363//heterocyclic compound binding;GO:0097159//organic cyclic compound binding;GO:0043167//…	GO:0019538//protein metabolic process;GO:0044260//cellular macromolecule metabolic process;GO:1901360//organic cyclic compound metabolic process;GO:0006725//cellular aromatic compound metabolic process;GO:0008152//metabolic process;GO:0065007//biological regulation;GO:0006259//DNA metabolic process;GO:0006807//nitrogen compound metabolic process;GO:0006139//nucleobase-containing compound metaboli…
UNIGENE0002048	ID_1058	21	PREDICTED: crocetin glucoside glucosyltransferase-like [Eucalyptus grandis]	-	-	GO:0016740//transferase activity;GO:0003824//catalytic activity;GO:0016757//transferase activity, transferring glycosyl groups	-
UNIGENE0002053	ID_1059	25	Ubiquitin supergroup,Ribosomal protein L40e [Theobroma cacao]	ko03010//Ribosome//Translation//Genetic Information Processing	GO:0044424//intracellular part;GO:0005622//intracellular;GO:0043229//intracellular organelle;GO:0005623//cell;GO:0043227//membrane-bounded organelle;GO:0032991//macromolecular complex;GO:0043231//intracellular membrane-bounded organelle;GO:0030529//ribonucleoprotein complex;GO:0043226//organelle;GO:0044464//cell part	GO:0005198//structural molecule activity	GO:0071704//organic substance metabolic process;GO:0010467//gene expression;GO:0008152//metabolic process;GO:0043170//macromolecule metabolic process
UNIGENE0002055	ID_1060	12	PREDICTED: uncharacterized protein LOC101217803 [Cucumis sativus]	-	-	-	-
UNIGENE0002056	ID_1061	1	PREDICTED: transcription factor bHLH85-like [Cucumis sativus]	-	-	-	-
UNIGENE0002058	ID_1062	6	--	-	-	-	-
UNIGENE0002059	ID_1063	4	--	-	-	-	-
UNIGENE0002063	ID_1064	10	--	-	-	-	-
UNIGENE0002065	ID_1065	7	--	-	-	-	-
UNIGENE0002066	ID_1066	12	--	-	-	-	-
UNIGENE0002068	ID_1067	17	BnaA09g27640D [Brassica napus]	-	-	-	-
UNIGENE0002069	ID_1068	17	BnaA09g27640D [Brassica napus]	-	-	-	-
UNIGENE0002070	ID_1069	14	--	-	-	-	-
UNIGENE0002071	ID_1070	21	PREDICTED: RING-H2 finger protein ATL40-like, partial [Cucumis sativus]	-	-	GO:0046914//transition metal ion binding;GO:0043167//ion binding;GO:0046872//metal ion binding;GO:0043169//cation binding;GO:0005488//binding	-
UNIGENE0002073	ID_1071	10	--	-	-	-	-
UNIGENE0002076	ID_1072	12	PREDICTED: 1-aminocyclopropane-1-carboxylate oxidase 5 [Cucumis sativus]	-	-	GO:0005488//binding;GO:0003824//catalytic activity;GO:0051213//dioxygenase activity;GO:0016491//oxidoreductase activity;GO:0043167//ion binding;GO:0046914//transition metal ion binding;GO:0043169//cation binding;GO:0016705//oxidoreductase activity, acting on paired donors, with incorporation or reduction of molecular oxygen;GO:0016706//oxidoreductase activity, acting on paired donors, with incorp…	GO:0009058//biosynthetic process;GO:0051552//flavone metabolic process;GO:0044711//single-organism biosynthetic process;GO:0008152//metabolic process;GO:0044710//single-organism metabolic process;GO:0044699//single-organism process;GO:0009813//flavonoid biosynthetic process;GO:0046148//pigment biosynthetic process;GO:0042440//pigment metabolic process;GO:1901576//organic substance biosynthetic pr…
UNIGENE0002077	ID_1073	21	unnamed protein product [Coffea canephora]	-	-	-	-
UNIGENE0002079	ID_1074	17	allene oxide synthase [Cucumis sativus]	ko00592//alpha-Linolenic acid metabolism//Lipid metabolism//Metabolism	-	GO:0016836//hydro-lyase activity;GO:0016491//oxidoreductase activity;GO:0043169//cation binding;GO:0097159//organic cyclic compound binding;GO:0003824//catalytic activity;GO:0043167//ion binding;GO:1901363//heterocyclic compound binding;GO:0046872//metal ion binding;GO:0016829//lyase activity;GO:0046914//transition metal ion binding;GO:0046906//tetrapyrrole binding;GO:0005488//binding;GO:0016835/…	GO:0044710//single-organism metabolic process;GO:0044699//single-organism process;GO:0008152//metabolic process
UNIGENE0002080	ID_1075	9	--	-	-	-	-
UNIGENE0002081	ID_1076	7	PREDICTED: uncharacterized mitochondrial protein AtMg00810-like [Glycine max]	-	-	GO:0016740//transferase activity;GO:0043169//cation binding;GO:0043167//ion binding;GO:0016772//transferase activity, transferring phosphorus-containing groups;GO:0005488//binding;GO:0046872//metal ion binding;GO:0003824//catalytic activity	GO:0006796//phosphate-containing compound metabolic process;GO:0006793//phosphorus metabolic process;GO:0008152//metabolic process;GO:0044237//cellular metabolic process;GO:0009987//cellular process
UNIGENE0002087	ID_1077	6	--	-	-	-	-
UNIGENE0002089	ID_1078	7	binding protein [Arabidopsis lyrata subsp. lyrata]	-	-	-	-
UNIGENE0002090	ID_1079	12	--	-	-	-	-
UNIGENE0002091	ID_1080	2	--	-	-	-	-
UNIGENE0002092	ID_1081	12	--	-	-	-	-
UNIGENE0002093	ID_1082	21	elongation factor 1 alpha, partial [Euglena longa]	ko03013//RNA transport//Translation//Genetic Information Processing	GO:0005623//cell;GO:0044424//intracellular part;GO:0005622//intracellular;GO:0044464//cell part	GO:0016787//hydrolase activity;GO:0016818//hydrolase activity, acting on acid anhydrides, in phosphorus-containing anhydrides;GO:0097159//organic cyclic compound binding;GO:0097367//carbohydrate derivative binding;GO:0036094//small molecule binding;GO:0017111//nucleoside-triphosphatase activity;GO:0001883//purine nucleoside binding;GO:0016740//transferase activity;GO:1901363//heterocyclic compoun…	GO:1901576//organic substance biosynthetic process;GO:0071704//organic substance metabolic process;GO:0009058//biosynthetic process;GO:0034645//cellular macromolecule biosynthetic process;GO:0009059//macromolecule biosynthetic process;GO:0043170//macromolecule metabolic process;GO:0044260//cellular macromolecule metabolic process;GO:0044237//cellular metabolic process;GO:0008152//metabolic proces…
UNIGENE0002095	ID_1083	12	--	-	-	-	-
UNIGENE0002096	ID_1084	4	Luminal-binding protein 2 [Morus notabilis]	-	-	GO:1901363//heterocyclic compound binding;GO:0097159//organic cyclic compound binding;GO:0005488//binding	-
UNIGENE0002098	ID_1085	7	PREDICTED: protein NRT1/ PTR FAMILY 7.3-like [Cucumis melo]	-	GO:0016020//membrane;GO:0031224//intrinsic component of membrane;GO:0044425//membrane part	GO:0022891//substrate-specific transmembrane transporter activity;GO:0005215//transporter activity;GO:0015075//ion transmembrane transporter activity;GO:0022857//transmembrane transporter activity;GO:0022892//substrate-specific transporter activity;GO:0022804//active transmembrane transporter activity;GO:0015291//secondary active transmembrane transporter activity;GO:0015103//inorganic anion tran…	GO:0032870//cellular response to hormone stimulus;GO:0071496//cellular response to external stimulus;GO:0009725//response to hormone;GO:0010033//response to organic substance;GO:0009605//response to external stimulus;GO:0023052//signaling;GO:0031668//cellular response to extracellular stimulus;GO:1901564//organonitrogen compound metabolic process;GO:0009987//cellular process;GO:0006725//cellular …
UNIGENE0002100	ID_1086	12	--	-	-	-	-
UNIGENE0002101	ID_1087	4	--	-	-	-	-
UNIGENE0002103	ID_1088	21	PREDICTED: protodermal factor 1-like [Cucumis melo]	-	-	-	-
UNIGENE0002108	ID_1089	21	PREDICTED: sterol 3-beta-glucosyltransferase UGT80A2-like [Cucumis sativus]	-	GO:0016020//membrane	GO:0046527//glucosyltransferase activity;GO:0016740//transferase activity;GO:0016757//transferase activity, transferring glycosyl groups;GO:0035251//UDP-glucosyltransferase activity;GO:0008194//UDP-glycosyltransferase activity;GO:0016758//transferase activity, transferring hexosyl groups;GO:0003824//catalytic activity;GO:0016906//sterol 3-beta-glucosyltransferase activity	GO:0009058//biosynthetic process;GO:0044237//cellular metabolic process;GO:0044238//primary metabolic process;GO:0044707//single-multicellular organism process;GO:1901362//organic cyclic compound biosynthetic process;GO:0008202//steroid metabolic process;GO:1901615//organic hydroxy compound metabolic process;GO:0008152//metabolic process;GO:0006066//alcohol metabolic process;GO:0044711//single-or…
UNIGENE0002110	ID_1090	10	PREDICTED: thioredoxin-like protein CDSP32, chloroplastic [Cucumis melo]	-	GO:0043231//intracellular membrane-bounded organelle;GO:0005622//intracellular;GO:0044444//cytoplasmic part;GO:0005623//cell;GO:0043229//intracellular organelle;GO:0005737//cytoplasm;GO:0009536//plastid;GO:0043227//membrane-bounded organelle;GO:0044446//intracellular organelle part;GO:0031975//envelope;GO:0043226//organelle;GO:0044435//plastid part;GO:0044422//organelle part;GO:0044464//cell part…	GO:0003824//catalytic activity;GO:0016667//oxidoreductase activity, acting on a sulfur group of donors;GO:0015036//disulfide oxidoreductase activity;GO:0016491//oxidoreductase activity	GO:0050896//response to stimulus;GO:0044763//single-organism cellular process;GO:0065008//regulation of biological quality;GO:0071704//organic substance metabolic process;GO:0006950//response to stress;GO:0019725//cellular homeostasis;GO:0008152//metabolic process;GO:0044699//single-organism process;GO:0044710//single-organism metabolic process;GO:0065007//biological regulation;GO:0009987//cellul…
UNIGENE0002111	ID_1091	7	YT521-B-like family protein, expressed [Oryza sativa Japonica Group]	-	GO:0005623//cell;GO:0043231//intracellular membrane-bounded organelle;GO:0044424//intracellular part;GO:0043229//intracellular organelle;GO:0005622//intracellular;GO:0043227//membrane-bounded organelle;GO:0043226//organelle;GO:0044464//cell part	-	-
UNIGENE0002113	ID_1092	21	PREDICTED: glycine-rich cell wall structural protein-like [Cucumis sativus]	-	-	-	-
UNIGENE0002117	ID_1093	6	Lipid transfer protein [Medicago truncatula]	-	-	-	-
UNIGENE0002118	ID_1094	21	hypothetical protein Csa_1G470400 [Cucumis sativus]	-	-	-	-
UNIGENE0002120	ID_1095	18	--	-	-	-	-
UNIGENE0002122	ID_1096	12	--	-	-	-	-
UNIGENE0002123	ID_1097	7	LRR receptor-like serine/threonine-protein kinase FLS2 [Aegilops tauschii]	-	-	-	-
UNIGENE0002125	ID_1098	20	PREDICTED: probable acyl-activating enzyme 2 [Cucumis sativus]	-	-	GO:0003824//catalytic activity	GO:0044699//single-organism process;GO:0071704//organic substance metabolic process;GO:0044710//single-organism metabolic process;GO:0008152//metabolic process;GO:0044238//primary metabolic process
UNIGENE0002126	ID_1099	23	PREDICTED: probable acyl-activating enzyme 2 [Cucumis sativus]	-	-	-	-
UNIGENE0002127	ID_1100	13	PREDICTED: UPF0544 protein C5orf45 homolog [Cucumis sativus]	-	-	-	-
UNIGENE0002128	ID_1101	12	--	-	-	-	-
UNIGENE0002129	ID_1102	10	--	-	-	-	-
UNIGENE0002132	ID_1103	7	--	-	-	-	-
UNIGENE0002136	ID_1104	6	--	-	-	-	-
UNIGENE0002138	ID_1105	2	--	-	-	-	-
UNIGENE0002139	ID_1106	6	--	-	-	-	-
UNIGENE0002140	ID_1107	6	--	-	-	-	-
UNIGENE0002145	ID_1108	15	BnaC03g71930D [Brassica napus]	-	-	-	-
UNIGENE0002146	ID_1109	20	defective in induced resistance 1 protein [Nicotiana tabacum]	-	-	-	-
UNIGENE0002148	ID_1110	10	PREDICTED: protein NRT1/ PTR FAMILY 4.4 [Cucumis melo]	-	-	-	GO:0051234//establishment of localization;GO:0051179//localization
UNIGENE0002149	ID_1111	12	--	-	-	-	-
UNIGENE0002150	ID_1112	6	--	-	-	-	-
UNIGENE0002151	ID_1113	12	--	-	-	-	-
UNIGENE0002153	ID_1114	16	PREDICTED: DNA replication licensing factor MCM5 [Cucumis melo]	ko03030//DNA replication//Replication and repair//Genetic Information Processing	GO:0005622//intracellular;GO:0044464//cell part;GO:0043229//intracellular organelle;GO:0044424//intracellular part;GO:0043231//intracellular membrane-bounded organelle;GO:0043226//organelle;GO:0043227//membrane-bounded organelle;GO:0043234//protein complex;GO:0032991//macromolecular complex;GO:0005623//cell	GO:0003676//nucleic acid binding;GO:0003824//catalytic activity;GO:0097367//carbohydrate derivative binding;GO:0097159//organic cyclic compound binding;GO:0016462//pyrophosphatase activity;GO:1901363//heterocyclic compound binding;GO:0036094//small molecule binding;GO:0016818//hydrolase activity, acting on acid anhydrides, in phosphorus-containing anhydrides;GO:0016817//hydrolase activity, acting…	GO:0006139//nucleobase-containing compound metabolic process;GO:0009987//cellular process;GO:0006807//nitrogen compound metabolic process;GO:0006304//DNA modification;GO:0018205//peptidyl-lysine modification;GO:0044237//cellular metabolic process;GO:0051301//cell division;GO:0032259//methylation;GO:0006996//organelle organization;GO:0006479//protein methylation;GO:0016043//cellular component orga…
UNIGENE0002154	ID_1115	21	At1g04330, partial [Arabidopsis thaliana]	-	-	-	-
UNIGENE0002155	ID_1116	21	PREDICTED: probable WRKY transcription factor 49 [Cucumis melo]	-	-	GO:1901363//heterocyclic compound binding;GO:0005488//binding;GO:0003676//nucleic acid binding;GO:0097159//organic cyclic compound binding;GO:0003677//DNA binding	GO:0043170//macromolecule metabolic process;GO:0071704//organic substance metabolic process;GO:0008152//metabolic process;GO:0010467//gene expression
UNIGENE0002158	ID_1117	11	--	-	-	-	-
UNIGENE0002159	ID_1118	12	--	-	-	-	-
UNIGENE0002160	ID_1119	6	--	-	-	-	-
UNIGENE0002161	ID_1120	14	PREDICTED: malonyl-CoA:anthocyanidin 5-O-glucoside-6''-O-malonyltransferase-like [Cucumis melo]	-	-	-	-
UNIGENE0002162	ID_1121	12	--	-	-	-	-
UNIGENE0002163	ID_1122	24	--	-	-	-	-
UNIGENE0002164	ID_1123	6	--	-	-	-	-
UNIGENE0002165	ID_1124	6	--	-	-	-	-
UNIGENE0002166	ID_1125	12	--	-	-	-	-
UNIGENE0002167	ID_1126	7	PREDICTED: zinc finger protein 2 [Vitis vinifera]	-	-	GO:0005488//binding;GO:0043169//cation binding;GO:0043167//ion binding;GO:0001071//nucleic acid binding transcription factor activity	GO:0050789//regulation of biological process;GO:0065007//biological regulation;GO:0060255//regulation of macromolecule metabolic process;GO:0010468//regulation of gene expression;GO:0019222//regulation of metabolic process
UNIGENE0002169	ID_1127	17	--	-	-	-	-
UNIGENE0002170	ID_1128	12	Telomere-associated protein RIF1 [Glycine soja]	-	-	-	-
UNIGENE0002171	ID_1129	6	PREDICTED: micronuclear linker histone polyprotein [Cucumis melo]	-	-	-	-
UNIGENE0002178	ID_1130	3	DVL9 [Medicago truncatula]	-	-	-	-
UNIGENE0002179	ID_1131	24	PREDICTED: 60S ribosomal protein L27-like [Eucalyptus grandis]	ko03010//Ribosome//Translation//Genetic Information Processing	GO:0005622//intracellular;GO:0032991//macromolecular complex;GO:0044424//intracellular part;GO:0005623//cell;GO:0030529//ribonucleoprotein complex;GO:0044464//cell part	GO:0005198//structural molecule activity	GO:0071704//organic substance metabolic process;GO:0043170//macromolecule metabolic process;GO:0010467//gene expression;GO:0008152//metabolic process
UNIGENE0002180	ID_1132	18	--	-	-	-	-
UNIGENE0002182	ID_1133	12	--	-	-	-	-
UNIGENE0002184	ID_1134	11	--	-	-	-	-
UNIGENE0002186	ID_1135	14	--	-	-	-	-
UNIGENE0002189	ID_1136	15	expressed protein [Oryza sativa Japonica Group]	-	GO:0005622//intracellular;GO:0005737//cytoplasm;GO:0044444//cytoplasmic part;GO:0044424//intracellular part;GO:0005623//cell;GO:0044464//cell part	-	-
UNIGENE0002190	ID_1137	12	--	-	-	-	-
UNIGENE0002194	ID_1138	19	PREDICTED: pentatricopeptide repeat-containing protein At1g74630 [Cucumis sativus]	-	-	-	-
UNIGENE0002195	ID_1139	7	PREDICTED: BEACH domain-containing protein lvsC isoform X2 [Cucumis melo]	-	-	-	-
UNIGENE0002196	ID_1140	10	PREDICTED: abscisic acid 8'-hydroxylase 2 isoform X2 [Cucumis sativus]	-	-	GO:1901363//heterocyclic compound binding;GO:0043167//ion binding;GO:0043169//cation binding;GO:0016491//oxidoreductase activity;GO:0003824//catalytic activity;GO:0046872//metal ion binding;GO:0046914//transition metal ion binding;GO:0097159//organic cyclic compound binding;GO:0005488//binding;GO:0046906//tetrapyrrole binding	GO:0044710//single-organism metabolic process;GO:0008152//metabolic process;GO:0044699//single-organism process
UNIGENE0002198	ID_1141	2	--	-	-	-	-
UNIGENE0002202	ID_1142	2	ty3-gypsy retrotransposon protein [Cucumis melo subsp. melo]	-	-	-	-
UNIGENE0002203	ID_1143	11	--	-	-	-	-
UNIGENE0002205	ID_1144	15	--	-	-	-	-
UNIGENE0002206	ID_1145	1	--	-	-	-	-
UNIGENE0002207	ID_1146	10	--	-	-	-	-
UNIGENE0002208	ID_1147	6	DUF4228 domain protein [Medicago truncatula]	-	-	-	-
UNIGENE0002209	ID_1148	12	PREDICTED: MATE efflux family protein 7-like [Prunus mume]	-	GO:0044425//membrane part;GO:0016020//membrane;GO:0031224//intrinsic component of membrane	GO:0022804//active transmembrane transporter activity;GO:0005215//transporter activity;GO:0022857//transmembrane transporter activity;GO:0015291//secondary active transmembrane transporter activity	GO:0009987//cellular process;GO:0044763//single-organism cellular process;GO:0044765//single-organism transport;GO:0044699//single-organism process;GO:1902578//single-organism localization;GO:0042221//response to chemical;GO:0051234//establishment of localization;GO:0051179//localization;GO:0006810//transport;GO:0015893//drug transport;GO:0050896//response to stimulus;GO:0042493//response to drug
UNIGENE0002210	ID_1149	17	--	-	-	-	-
UNIGENE0002213	ID_1150	3	--	-	-	-	-
UNIGENE0002214	ID_1151	10	--	-	-	-	-
UNIGENE0002215	ID_1152	10	--	-	-	-	-
UNIGENE0002221	ID_1153	20	--	-	-	-	-
UNIGENE0002223	ID_1154	10	--	-	-	-	-
UNIGENE0002226	ID_1155	21	50S ribosomal protein L35 [Cucumis sativus]	-	-	-	-
UNIGENE0002227	ID_1156	6	--	-	-	-	-
UNIGENE0002231	ID_1157	12	--	-	-	-	-
UNIGENE0002232	ID_1158	12	--	-	-	-	-
UNIGENE0002234	ID_1159	10	--	-	-	-	-
UNIGENE0002235	ID_1160	25	PREDICTED: plant intracellular Ras-group-related LRR protein 6-like [Cucumis sativus]	-	-	GO:0016787//hydrolase activity;GO:0042578//phosphoric ester hydrolase activity;GO:0003824//catalytic activity;GO:0016791//phosphatase activity;GO:0016788//hydrolase activity, acting on ester bonds	GO:0006793//phosphorus metabolic process;GO:0006796//phosphate-containing compound metabolic process;GO:0008152//metabolic process;GO:0044237//cellular metabolic process;GO:0009987//cellular process
UNIGENE0002236	ID_1161	12	PREDICTED: retrovirus-related Pol polyprotein from transposon TNT 1-94 [Sesamum indicum]	ko03018//RNA degradation//Folding, sorting and degradation//Genetic Information Processing;ko03008//Ribosome biogenesis in eukaryotes//Translation//Genetic Information Processing	-	-	-
UNIGENE0002238	ID_1162	9	hypothetical protein Csa_6G014510 [Cucumis sativus]	-	-	-	-
UNIGENE0002240	ID_1163	17	PREDICTED: cucumber peeling cupredoxin-like [Cucumis sativus]	-	-	-	-
UNIGENE0002241	ID_1164	20	--	-	-	-	-
UNIGENE0002242	ID_1165	4	--	-	-	-	-
UNIGENE0002247	ID_1166	7	--	-	-	-	-
UNIGENE0002248	ID_1167	15	--	-	-	-	-
UNIGENE0002250	ID_1168	6	--	-	-	-	-
UNIGENE0002251	ID_1169	10	--	-	-	-	-
UNIGENE0002253	ID_1170	3	PREDICTED: protein transport Sec1a-like isoform X1 [Cucumis melo]	-	-	-	GO:0016192//vesicle-mediated transport;GO:0048278//vesicle docking;GO:0033036//macromolecule localization;GO:0044763//single-organism cellular process;GO:0022406//membrane docking;GO:0008104//protein localization;GO:0009987//cellular process;GO:0044699//single-organism process;GO:0006810//transport;GO:0051234//establishment of localization;GO:0051179//localization
UNIGENE0002255	ID_1171	4	Homer [Gossypium arboreum]	-	-	-	GO:0006807//nitrogen compound metabolic process;GO:0044260//cellular macromolecule metabolic process;GO:0016070//RNA metabolic process;GO:0008152//metabolic process;GO:0007275//multicellular organismal development;GO:0009987//cellular process;GO:0046483//heterocycle metabolic process;GO:0044238//primary metabolic process;GO:0048513//organ development;GO:0009451//RNA modification;GO:0044707//singl…
UNIGENE0002259	ID_1172	3	PREDICTED: flowering-promoting factor 1-like [Pyrus x bretschneideri]	-	-	-	-
UNIGENE0002261	ID_1173	12	--	-	-	-	-
UNIGENE0002262	ID_1174	6	--	-	-	-	-
UNIGENE0002263	ID_1175	11	--	-	-	-	-
UNIGENE0002266	ID_1176	12	PREDICTED: MLP-like protein 328 [Cucumis melo]	-	-	-	GO:0006950//response to stress;GO:0050896//response to stimulus
UNIGENE0002268	ID_1177	22	PREDICTED: bidirectional sugar transporter SWEET12-like [Cucumis melo]	-	GO:0044425//membrane part;GO:0016020//membrane;GO:0031224//intrinsic component of membrane	-	GO:0051234//establishment of localization;GO:0006810//transport;GO:0051179//localization
UNIGENE0002269	ID_1178	12	PREDICTED: protein SRG1 [Cucumis melo]	-	-	GO:0051213//dioxygenase activity;GO:0016706//oxidoreductase activity, acting on paired donors, with incorporation or reduction of molecular oxygen, 2-oxoglutarate as one donor, and incorporation of one atom each of oxygen into both donors;GO:0003824//catalytic activity;GO:0016705//oxidoreductase activity, acting on paired donors, with incorporation or reduction of molecular oxygen;GO:0043169//cat…	GO:0071704//organic substance metabolic process;GO:0009058//biosynthetic process;GO:0051553//flavone biosynthetic process;GO:0051552//flavone metabolic process;GO:0008152//metabolic process;GO:0046148//pigment biosynthetic process;GO:0044699//single-organism process;GO:0044711//single-organism biosynthetic process;GO:0009813//flavonoid biosynthetic process;GO:0042440//pigment metabolic process;GO…
UNIGENE0002271	ID_1179	24	PREDICTED: cationic peroxidase 1-like [Cucumis melo]	ko00940//Phenylpropanoid biosynthesis//Biosynthesis of other secondary metabolites//Metabolism	-	GO:0097159//organic cyclic compound binding;GO:0043167//ion binding;GO:0046906//tetrapyrrole binding;GO:0016209//antioxidant activity;GO:0003824//catalytic activity;GO:0005488//binding;GO:1901363//heterocyclic compound binding;GO:0043169//cation binding	GO:0050896//response to stimulus;GO:0006950//response to stress;GO:0008152//metabolic process;GO:0044710//single-organism metabolic process;GO:0044699//single-organism process
UNIGENE0002272	ID_1180	7	--	-	-	-	-
UNIGENE0002274	ID_1181	4	PREDICTED: RING-H2 finger protein ATL57 [Vitis vinifera]	-	-	-	-
UNIGENE0002275	ID_1182	10	PREDICTED: RING-H2 finger protein ATL57 [Vitis vinifera]	-	-	-	-
UNIGENE0002276	ID_1183	9	PREDICTED: vesicle-associated membrane protein 725-like [Camelina sativa]	-	GO:0016020//membrane;GO:0044425//membrane part;GO:0031224//intrinsic component of membrane	-	GO:0006810//transport;GO:0051234//establishment of localization;GO:0051179//localization
UNIGENE0002280	ID_1184	10	PREDICTED: protein FD [Cucumis melo]	-	-	GO:1901363//heterocyclic compound binding;GO:0005488//binding;GO:0097159//organic cyclic compound binding;GO:0003676//nucleic acid binding;GO:0003677//DNA binding;GO:0001071//nucleic acid binding transcription factor activity	GO:0050789//regulation of biological process;GO:0065007//biological regulation;GO:0060255//regulation of macromolecule metabolic process;GO:0019222//regulation of metabolic process;GO:0010468//regulation of gene expression
UNIGENE0002281	ID_1185	10	PREDICTED: protein FD [Cucumis melo]	-	-	GO:0001071//nucleic acid binding transcription factor activity;GO:0097159//organic cyclic compound binding;GO:0003676//nucleic acid binding;GO:1901363//heterocyclic compound binding;GO:0003677//DNA binding;GO:0005488//binding	GO:0019222//regulation of metabolic process;GO:0010468//regulation of gene expression;GO:0050789//regulation of biological process;GO:0065007//biological regulation;GO:0060255//regulation of macromolecule metabolic process
UNIGENE0002284	ID_1186	12	--	-	-	-	-
UNIGENE0002287	ID_1187	16	PREDICTED: (R,S)-reticuline 7-O-methyltransferase-like [Cucumis melo]	-	-	GO:0008171//O-methyltransferase activity;GO:0008168//methyltransferase activity;GO:0016741//transferase activity, transferring one-carbon groups;GO:0016740//transferase activity;GO:0005488//binding;GO:0003824//catalytic activity;GO:0005515//protein binding	GO:0008152//metabolic process
UNIGENE0002288	ID_1188	21	PREDICTED: protein ASPARTIC PROTEASE IN GUARD CELL 1 [Cucumis sativus]	-	GO:0043226//organelle;GO:0044464//cell part;GO:0044424//intracellular part;GO:0043227//membrane-bounded organelle;GO:0005622//intracellular;GO:0043231//intracellular membrane-bounded organelle;GO:0043229//intracellular organelle;GO:0005623//cell	GO:0005488//binding;GO:0008233//peptidase activity;GO:0016787//hydrolase activity;GO:0003824//catalytic activity;GO:0004175//endopeptidase activity;GO:0097159//organic cyclic compound binding;GO:0003676//nucleic acid binding;GO:0070011//peptidase activity, acting on L-amino acid peptides;GO:1901363//heterocyclic compound binding	GO:0043170//macromolecule metabolic process;GO:0008152//metabolic process;GO:0042221//response to chemical;GO:0044238//primary metabolic process;GO:0071704//organic substance metabolic process;GO:0019538//protein metabolic process;GO:0006950//response to stress;GO:0001101//response to acid chemical;GO:0050896//response to stimulus
UNIGENE0002290	ID_1189	12	RNA-directed DNA polymerase (Reverse transcriptase) [Medicago truncatula]	-	-	GO:0016301//kinase activity;GO:0016772//transferase activity, transferring phosphorus-containing groups;GO:0005488//binding;GO:1901363//heterocyclic compound binding;GO:0097159//organic cyclic compound binding;GO:0016740//transferase activity;GO:0003824//catalytic activity	GO:0006725//cellular aromatic compound metabolic process;GO:0090304//nucleic acid metabolic process;GO:0008152//metabolic process;GO:0044238//primary metabolic process;GO:0046483//heterocycle metabolic process;GO:0044763//single-organism cellular process;GO:0006807//nitrogen compound metabolic process;GO:0009987//cellular process;GO:0044699//single-organism process;GO:0034641//cellular nitrogen c…
UNIGENE0002293	ID_1190	25	RecName: Full=Isocitrate lyase; Short=ICL; AltName: Full=Isocitrase; AltName: Full=Isocitratsysase [Cucumis sativus]	ko01200//Carbon metabolism//Global and Overview//Metabolism;ko00630//Glyoxylate and dicarboxylate metabolism//Carbohydrate metabolism//Metabolism	GO:0005777//peroxisome;GO:0042579//microbody;GO:0005623//cell;GO:0005622//intracellular;GO:0043226//organelle;GO:0044444//cytoplasmic part;GO:0043231//intracellular membrane-bounded organelle;GO:0043227//membrane-bounded organelle;GO:0005737//cytoplasm;GO:0043229//intracellular organelle;GO:0044424//intracellular part;GO:0044464//cell part	GO:0016829//lyase activity;GO:0003824//catalytic activity;GO:0016830//carbon-carbon lyase activity;GO:0016833//oxo-acid-lyase activity	GO:0009987//cellular process;GO:0003006//developmental process involved in reproduction;GO:0032502//developmental process;GO:0006082//organic acid metabolic process;GO:0008152//metabolic process;GO:0044262//cellular carbohydrate metabolic process;GO:0005975//carbohydrate metabolic process;GO:0044699//single-organism process;GO:0044238//primary metabolic process;GO:0044763//single-organism cellula…
UNIGENE0002296	ID_1191	12	--	-	-	-	-
UNIGENE0002299	ID_1192	2	--	-	-	-	-
UNIGENE0002303	ID_1193	9	PREDICTED: L-Ala-D/L-amino acid epimerase isoform X2 [Cucumis sativus]	-	-	-	-
UNIGENE0002305	ID_1194	20	--	-	-	-	-
UNIGENE0002308	ID_1195	7	G-box binding factor bZIP transcription factor [Medicago truncatula]	-	-	-	-
UNIGENE0002311	ID_1196	21	--	-	-	-	-
UNIGENE0002314	ID_1197	7	PREDICTED: casein kinase II subunit beta-2-like [Cucumis melo]	-	-	-	-
UNIGENE0002315	ID_1198	6	--	-	-	-	-
UNIGENE0002318	ID_1199	14	PREDICTED: transcription factor bHLH78 [Cucumis sativus]	-	-	-	-
UNIGENE0002319	ID_1200	23	PREDICTED: transcription factor bHLH78 [Cucumis sativus]	-	-	GO:0005515//protein binding;GO:0005488//binding	-
UNIGENE0002320	ID_1201	22	PREDICTED: protein ALWAYS EARLY 2-like [Cucumis melo]	-	-	GO:0005488//binding	GO:0009987//cellular process
UNIGENE0002321	ID_1202	12	--	-	-	-	-
UNIGENE0002322	ID_1203	17	--	-	-	-	-
UNIGENE0002323	ID_1204	12	--	-	-	-	-
UNIGENE0002324	ID_1205	12	PREDICTED: probable WRKY transcription factor 40 [Cucumis melo]	-	-	-	-
UNIGENE0002325	ID_1206	24	PREDICTED: glucose and ribitol dehydrogenase homolog 1 [Cucumis melo]	-	GO:0043229//intracellular organelle;GO:0044444//cytoplasmic part;GO:0005737//cytoplasm;GO:0009536//plastid;GO:0043231//intracellular membrane-bounded organelle;GO:0043227//membrane-bounded organelle;GO:0044424//intracellular part;GO:0005622//intracellular;GO:0044464//cell part;GO:0005623//cell;GO:0043226//organelle	GO:0016614//oxidoreductase activity, acting on CH-OH group of donors;GO:0016491//oxidoreductase activity;GO:0003824//catalytic activity;GO:0004033//aldo-keto reductase (NADP) activity;GO:0016616//oxidoreductase activity, acting on the CH-OH group of donors, NAD or NADP as acceptor	GO:0044699//single-organism process;GO:0008152//metabolic process;GO:0044710//single-organism metabolic process
UNIGENE0002326	ID_1207	21	PREDICTED: glucose and ribitol dehydrogenase homolog 1 [Cucumis melo]	-	-	GO:0016746//transferase activity, transferring acyl groups;GO:0016740//transferase activity;GO:0003824//catalytic activity;GO:0004312//fatty acid synthase activity;GO:0016747//transferase activity, transferring acyl groups other than amino-acyl groups	GO:0044710//single-organism metabolic process;GO:0044699//single-organism process;GO:0008152//metabolic process
UNIGENE0002327	ID_1208	9	PREDICTED: probable CCR4-associated factor 1 homolog 11 [Cucumis sativus]	ko03018//RNA degradation//Folding, sorting and degradation//Genetic Information Processing	GO:0043227//membrane-bounded organelle;GO:0005622//intracellular;GO:0044424//intracellular part;GO:0043229//intracellular organelle;GO:0043226//organelle;GO:0005623//cell;GO:0044464//cell part;GO:0043231//intracellular membrane-bounded organelle	GO:0000175//3'-5'-exoribonuclease activity;GO:0016787//hydrolase activity;GO:0016796//exonuclease activity, active with either ribo- or deoxyribonucleic acids and producing 5'-phosphomonoesters;GO:0008408//3'-5' exonuclease activity;GO:0004540//ribonuclease activity;GO:0005488//binding;GO:0004532//exoribonuclease activity;GO:0016896//exoribonuclease activity, producing 5'-phosphomonoesters;GO:009…	GO:0071704//organic substance metabolic process;GO:0006807//nitrogen compound metabolic process;GO:0090501//RNA phosphodiester bond hydrolysis;GO:0034641//cellular nitrogen compound metabolic process;GO:0006725//cellular aromatic compound metabolic process;GO:0016070//RNA metabolic process;GO:0043170//macromolecule metabolic process;GO:0044260//cellular macromolecule metabolic process;GO:0090305/…
UNIGENE0002328	ID_1209	7	PREDICTED: superkiller viralicidic activity 2-like 2 [Nicotiana tomentosiformis]	-	-	-	-
UNIGENE0002330	ID_1210	12	--	-	-	-	-
UNIGENE0002332	ID_1211	22	--	-	-	-	-
UNIGENE0002334	ID_1212	21	PREDICTED: protein PSY1-like [Cucumis melo]	-	-	-	-
UNIGENE0002335	ID_1213	12	--	-	-	-	-
UNIGENE0002336	ID_1214	17	PREDICTED: pyruvate decarboxylase 1-like [Cucumis sativus]	ko00010//Glycolysis / Gluconeogenesis//Carbohydrate metabolism//Metabolism	-	GO:0043167//ion binding;GO:0016830//carbon-carbon lyase activity;GO:0019842//vitamin binding;GO:0016831//carboxy-lyase activity;GO:0046872//metal ion binding;GO:0005488//binding;GO:0036094//small molecule binding;GO:0016829//lyase activity;GO:0003824//catalytic activity;GO:0043169//cation binding	-
UNIGENE0002337	ID_1215	18	PREDICTED: pyruvate decarboxylase 1-like [Cucumis sativus]	ko00010//Glycolysis / Gluconeogenesis//Carbohydrate metabolism//Metabolism	-	GO:0046872//metal ion binding;GO:0003824//catalytic activity;GO:0043167//ion binding;GO:0019842//vitamin binding;GO:0043169//cation binding;GO:0016831//carboxy-lyase activity;GO:0016829//lyase activity;GO:0005488//binding;GO:0036094//small molecule binding;GO:0016830//carbon-carbon lyase activity	-
UNIGENE0002338	ID_1216	6	--	-	-	-	-
UNIGENE0002339	ID_1217	10	--	-	-	-	-
UNIGENE0002340	ID_1218	11	PREDICTED: cytochrome P450 CYP82D47-like [Cucumis sativus]	-	-	GO:0004497//monooxygenase activity;GO:0043167//ion binding;GO:0005488//binding;GO:1901363//heterocyclic compound binding;GO:0046872//metal ion binding;GO:0016709//oxidoreductase activity, acting on paired donors, with incorporation or reduction of molecular oxygen, NAD(P)H as one donor, and incorporation of one atom of oxygen;GO:0003824//catalytic activity;GO:0046914//transition metal ion binding…	GO:0008152//metabolic process;GO:0044699//single-organism process;GO:0044710//single-organism metabolic process
UNIGENE0002341	ID_1219	4	PREDICTED: pentatricopeptide repeat-containing protein At1g22960, mitochondrial [Cucumis melo]	-	-	-	-
UNIGENE0002343	ID_1220	6	PREDICTED: pentatricopeptide repeat-containing protein At1g22960, mitochondrial [Cucumis melo]	-	GO:0043226//organelle;GO:0005622//intracellular;GO:0005623//cell;GO:0044424//intracellular part;GO:0043227//membrane-bounded organelle;GO:0043229//intracellular organelle;GO:0043231//intracellular membrane-bounded organelle;GO:0044464//cell part	-	-
UNIGENE0002346	ID_1221	10	--	-	-	-	-
UNIGENE0002348	ID_1222	1	PREDICTED: probable pectinesterase 8 [Cucumis melo]	-	GO:0044464//cell part;GO:0071944//cell periphery;GO:0030312//external encapsulating structure;GO:0005623//cell	GO:0016787//hydrolase activity;GO:0052689//carboxylic ester hydrolase activity;GO:0016788//hydrolase activity, acting on ester bonds;GO:0003824//catalytic activity	GO:0000272//polysaccharide catabolic process;GO:0008152//metabolic process;GO:0016052//carbohydrate catabolic process;GO:0009987//cellular process;GO:0009056//catabolic process;GO:0071554//cell wall organization or biogenesis;GO:0005975//carbohydrate metabolic process;GO:0009057//macromolecule catabolic process;GO:0071840//cellular component organization or biogenesis;GO:0005976//polysaccharide m…
UNIGENE0002351	ID_1223	20	--	-	-	-	-
UNIGENE0002354	ID_1224	3	--	-	-	-	-
UNIGENE0002358	ID_1225	12	--	-	-	-	-
UNIGENE0002359	ID_1226	21	Os11g0211800 [Oryza sativa Japonica Group]	-	GO:0043227//membrane-bounded organelle;GO:0044464//cell part;GO:0044424//intracellular part;GO:0005622//intracellular;GO:0043229//intracellular organelle;GO:0043226//organelle;GO:0005623//cell;GO:0043231//intracellular membrane-bounded organelle	GO:0016248//channel inhibitor activity;GO:0016247//channel regulator activity;GO:0098772//molecular function regulator	GO:0051704//multi-organism process
UNIGENE0002361	ID_1227	12	--	-	-	-	-
UNIGENE0002362	ID_1228	25	PREDICTED: 60S acidic ribosomal protein P1-like [Populus euphratica]	ko03010//Ribosome//Translation//Genetic Information Processing	GO:0005840//ribosome;GO:0030529//ribonucleoprotein complex;GO:0044424//intracellular part;GO:0043229//intracellular organelle;GO:0005623//cell;GO:0043226//organelle;GO:0044464//cell part;GO:0005622//intracellular;GO:0005737//cytoplasm;GO:0043232//intracellular non-membrane-bounded organelle;GO:0044444//cytoplasmic part;GO:0043228//non-membrane-bounded organelle;GO:0032991//macromolecular complex	GO:0005198//structural molecule activity	GO:1901576//organic substance biosynthetic process;GO:0034645//cellular macromolecule biosynthetic process;GO:0044260//cellular macromolecule metabolic process;GO:0008152//metabolic process;GO:0009058//biosynthetic process;GO:0044237//cellular metabolic process;GO:0043170//macromolecule metabolic process;GO:0009059//macromolecule biosynthetic process;GO:0071704//organic substance metabolic proces…
UNIGENE0002363	ID_1229	21	PREDICTED: arogenate dehydratase/prephenate dehydratase 6, chloroplastic-like [Cucumis melo]	ko01230//Biosynthesis of amino acids//Global and Overview//Metabolism;ko00400//Phenylalanine, tyrosine and tryptophan biosynthesis//Amino acid metabolism//Metabolism	-	GO:0036094//small molecule binding;GO:0016835//carbon-oxygen lyase activity;GO:0016829//lyase activity;GO:0005488//binding;GO:0031406//carboxylic acid binding;GO:0043167//ion binding;GO:0043168//anion binding;GO:0043177//organic acid binding;GO:0003824//catalytic activity;GO:0016836//hydro-lyase activity	GO:1901360//organic cyclic compound metabolic process;GO:1901564//organonitrogen compound metabolic process;GO:0006082//organic acid metabolic process;GO:0044238//primary metabolic process;GO:0008152//metabolic process;GO:0071704//organic substance metabolic process;GO:0043436//oxoacid metabolic process;GO:1901605//alpha-amino acid metabolic process;GO:1902221//erythrose 4-phosphate/phosphoenolpy…
UNIGENE0002367	ID_1230	12	--	-	-	-	-
UNIGENE0002368	ID_1231	20	--	-	-	-	-
UNIGENE0002370	ID_1232	10	PREDICTED: probable WRKY transcription factor 46 [Cucumis melo]	-	-	GO:0005488//binding;GO:0097159//organic cyclic compound binding;GO:0003677//DNA binding;GO:0001071//nucleic acid binding transcription factor activity;GO:1901363//heterocyclic compound binding;GO:0003676//nucleic acid binding	GO:0019222//regulation of metabolic process;GO:0010468//regulation of gene expression;GO:0050789//regulation of biological process;GO:0065007//biological regulation;GO:0060255//regulation of macromolecule metabolic process
UNIGENE0002372	ID_1233	12	PREDICTED: U-box domain-containing protein 44-like [Cucumis sativus]	ko04140//Regulation of autophagy//Transport and catabolism//Cellular Processes	-	GO:0003824//catalytic activity	-
UNIGENE0002373	ID_1234	7	gag-protease polyprotein [Cucumis melo subsp. melo]	-	-	-	-
UNIGENE0002375	ID_1235	6	PREDICTED: probable pectinesterase/pectinesterase inhibitor 39 [Cucumis sativus]	ko00500//Starch and sucrose metabolism//Carbohydrate metabolism//Metabolism;ko00040//Pentose and glucuronate interconversions//Carbohydrate metabolism//Metabolism	GO:0071944//cell periphery;GO:0005623//cell;GO:0030312//external encapsulating structure;GO:0044464//cell part	GO:0052689//carboxylic ester hydrolase activity;GO:0003824//catalytic activity;GO:0016787//hydrolase activity;GO:0016788//hydrolase activity, acting on ester bonds	GO:0045229//external encapsulating structure organization;GO:0071555//cell wall organization;GO:0016043//cellular component organization;GO:0009987//cellular process;GO:0071554//cell wall organization or biogenesis;GO:0071840//cellular component organization or biogenesis
UNIGENE0002376	ID_1236	3	--	-	-	-	-
UNIGENE0002378	ID_1237	6	PREDICTED: LOW QUALITY PROTEIN: cytochrome P450 84A1-like [Cucumis melo]	ko00940//Phenylpropanoid biosynthesis//Biosynthesis of other secondary metabolites//Metabolism	-	GO:0043169//cation binding;GO:0046906//tetrapyrrole binding;GO:0046872//metal ion binding;GO:0043167//ion binding;GO:0046914//transition metal ion binding;GO:1901363//heterocyclic compound binding;GO:0016491//oxidoreductase activity;GO:0097159//organic cyclic compound binding;GO:0003824//catalytic activity;GO:0005488//binding	GO:0044699//single-organism process;GO:0044710//single-organism metabolic process;GO:0008152//metabolic process
UNIGENE0002381	ID_1238	11	--	-	-	-	-
UNIGENE0002382	ID_1239	2	non-ltr retroelement reverse transcriptase [Rosa rugosa]	-	-	-	-
UNIGENE0002383	ID_1240	9	Elongation factor 1-alpha [Aegilops tauschii]	-	-	GO:0005488//binding;GO:0097159//organic cyclic compound binding	-
UNIGENE0002385	ID_1241	12	--	-	-	-	-
UNIGENE0002386	ID_1242	4	PREDICTED: DNA-directed RNA polymerase V subunit 1-like [Malus domestica]	-	-	-	-
UNIGENE0002387	ID_1243	10	--	-	-	-	-
UNIGENE0002388	ID_1244	12	--	-	-	-	-
UNIGENE0002390	ID_1245	12	--	-	-	-	-
UNIGENE0002391	ID_1246	12	PREDICTED: zinc finger BED domain-containing protein RICESLEEPER 2-like [Cicer arietinum]	-	-	GO:0005488//binding;GO:0097159//organic cyclic compound binding	-
UNIGENE0002392	ID_1247	20	PREDICTED: peroxidase 51-like [Cucumis melo]	ko00940//Phenylpropanoid biosynthesis//Biosynthesis of other secondary metabolites//Metabolism	-	GO:0043169//cation binding;GO:0097159//organic cyclic compound binding;GO:0003824//catalytic activity;GO:0016209//antioxidant activity;GO:0046906//tetrapyrrole binding;GO:0043167//ion binding;GO:0005488//binding;GO:1901363//heterocyclic compound binding	GO:0072593//reactive oxygen species metabolic process;GO:0044237//cellular metabolic process;GO:0042743//hydrogen peroxide metabolic process;GO:0050896//response to stimulus;GO:0009987//cellular process;GO:0044699//single-organism process;GO:0006950//response to stress;GO:0044710//single-organism metabolic process;GO:0008152//metabolic process
UNIGENE0002393	ID_1248	12	--	-	-	-	-
UNIGENE0002394	ID_1249	12	--	-	-	-	-
UNIGENE0002396	ID_1250	12	--	-	-	-	-
UNIGENE0002397	ID_1251	15	PREDICTED: anaphase-promoting complex subunit 8 [Cucumis sativus]	ko04120//Ubiquitin mediated proteolysis//Folding, sorting and degradation//Genetic Information Processing	GO:0043229//intracellular organelle;GO:0043234//protein complex;GO:0043226//organelle;GO:0000151//ubiquitin ligase complex;GO:0044424//intracellular part;GO:0044446//intracellular organelle part;GO:0044422//organelle part;GO:0044464//cell part;GO:0005634//nucleus;GO:0000152//nuclear ubiquitin ligase complex;GO:0005623//cell;GO:0044428//nuclear part;GO:1902494//catalytic complex;GO:0032991//macrom…	-	GO:0009058//biosynthetic process;GO:0006950//response to stress;GO:0050794//regulation of cellular process;GO:0050896//response to stimulus;GO:0071704//organic substance metabolic process;GO:0022414//reproductive process;GO:0065007//biological regulation;GO:0007049//cell cycle;GO:0009059//macromolecule biosynthetic process;GO:0051783//regulation of nuclear division;GO:0034641//cellular nitrogen c…
UNIGENE0002398	ID_1252	6	PREDICTED: anaphase-promoting complex subunit 8 [Cucumis melo]	ko04120//Ubiquitin mediated proteolysis//Folding, sorting and degradation//Genetic Information Processing	GO:0044464//cell part;GO:0044424//intracellular part;GO:0032991//macromolecular complex;GO:1990234//transferase complex;GO:0043229//intracellular organelle;GO:1902494//catalytic complex;GO:0000152//nuclear ubiquitin ligase complex;GO:0044422//organelle part;GO:0005622//intracellular;GO:0005623//cell;GO:0044446//intracellular organelle part;GO:0043227//membrane-bounded organelle;GO:0043226//organe…	-	GO:0051234//establishment of localization;GO:0040008//regulation of growth;GO:0006259//DNA metabolic process;GO:0033043//regulation of organelle organization;GO:0043412//macromolecule modification;GO:0050896//response to stimulus;GO:0006260//DNA replication;GO:0006464//cellular protein modification process;GO:1902582//single-organism intracellular transport;GO:0043170//macromolecule metabolic pro…
UNIGENE0002399	ID_1253	7	--	-	-	-	-
UNIGENE0002402	ID_1254	10	PREDICTED: regulatory protein NPR3-like [Cucumis melo]	ko04075//Plant hormone signal transduction//Signal transduction//Environmental Information Processing	-	-	-
UNIGENE0002404	ID_1255	12	PREDICTED: G-type lectin S-receptor-like serine/threonine-protein kinase At5g35370 [Cucumis sativus]	-	GO:0016020//membrane	GO:0032549//ribonucleoside binding;GO:0001882//nucleoside binding;GO:0004672//protein kinase activity;GO:1901363//heterocyclic compound binding;GO:0097159//organic cyclic compound binding;GO:0016773//phosphotransferase activity, alcohol group as acceptor;GO:0001883//purine nucleoside binding;GO:0003824//catalytic activity;GO:0032550//purine ribonucleoside binding;GO:0016772//transferase activity,…	GO:0071704//organic substance metabolic process;GO:0019538//protein metabolic process;GO:0009987//cellular process;GO:0036211//protein modification process;GO:0044267//cellular protein metabolic process;GO:0043412//macromolecule modification;GO:0044237//cellular metabolic process;GO:0006464//cellular protein modification process;GO:0008152//metabolic process;GO:0043170//macromolecule metabolic pr…
UNIGENE0002405	ID_1256	12	--	-	-	-	-
UNIGENE0002413	ID_1257	21	BnaC04g08430D [Brassica napus]	-	GO:0005737//cytoplasm;GO:0044435//plastid part;GO:0043229//intracellular organelle;GO:0043227//membrane-bounded organelle;GO:0043226//organelle;GO:0031967//organelle envelope;GO:0009536//plastid;GO:0044422//organelle part;GO:0043231//intracellular membrane-bounded organelle;GO:0044444//cytoplasmic part;GO:0005622//intracellular;GO:0044424//intracellular part;GO:0044446//intracellular organelle pa…	-	-
UNIGENE0002415	ID_1258	7	--	-	-	-	-
UNIGENE0002417	ID_1259	7	--	-	-	-	-
UNIGENE0002418	ID_1260	12	--	-	-	-	-
UNIGENE0002419	ID_1261	12	--	-	-	-	-
UNIGENE0002420	ID_1262	19	--	-	-	-	-
UNIGENE0002421	ID_1263	12	PREDICTED: rhodanese-like domain-containing protein 6-like [Citrus sinensis]	-	-	-	GO:0006811//ion transport;GO:0044281//small molecule metabolic process;GO:1902578//single-organism localization;GO:0042221//response to chemical;GO:0006812//cation transport;GO:0009692//ethylene metabolic process;GO:0043207//response to external biotic stimulus;GO:0050896//response to stimulus;GO:0008152//metabolic process;GO:0044237//cellular metabolic process;GO:0001101//response to acid chemic…
UNIGENE0002422	ID_1264	18	PREDICTED: LOW QUALITY PROTEIN: pentatricopeptide repeat-containing protein At2g37310 [Cucumis melo]	-	-	-	-
UNIGENE0002427	ID_1265	15	peroxidase, partial [Garcinia mangostana]	ko00940//Phenylpropanoid biosynthesis//Biosynthesis of other secondary metabolites//Metabolism	GO:0044464//cell part;GO:0044424//intracellular part;GO:0005622//intracellular;GO:0005623//cell;GO:0044444//cytoplasmic part;GO:0005737//cytoplasm	GO:0097159//organic cyclic compound binding;GO:0016209//antioxidant activity;GO:0005488//binding;GO:1901363//heterocyclic compound binding;GO:0043169//cation binding;GO:0046906//tetrapyrrole binding;GO:0003824//catalytic activity;GO:0043167//ion binding	GO:0009987//cellular process;GO:0044237//cellular metabolic process;GO:0072593//reactive oxygen species metabolic process;GO:0006950//response to stress;GO:0050896//response to stimulus;GO:0051704//multi-organism process;GO:0009607//response to biotic stimulus;GO:0044710//single-organism metabolic process;GO:0044699//single-organism process;GO:0042743//hydrogen peroxide metabolic process;GO:00081…
UNIGENE0002428	ID_1266	20	--	-	-	-	-
UNIGENE0002430	ID_1267	18	PREDICTED: zinc finger protein ZAT12-like [Cucumis melo]	-	-	GO:0043167//ion binding;GO:0005488//binding;GO:0043169//cation binding	-
UNIGENE0002431	ID_1268	12	--	-	-	-	-
UNIGENE0002433	ID_1269	17	PREDICTED: calmodulin-binding receptor-like cytoplasmic kinase 3 [Cucumis melo]	-	-	GO:0004672//protein kinase activity;GO:0005488//binding;GO:0001883//purine nucleoside binding;GO:0032550//purine ribonucleoside binding;GO:1901363//heterocyclic compound binding;GO:0032549//ribonucleoside binding;GO:0003824//catalytic activity;GO:0016740//transferase activity;GO:0097367//carbohydrate derivative binding;GO:0036094//small molecule binding;GO:0016773//phosphotransferase activity, al…	GO:0044763//single-organism cellular process;GO:0009987//cellular process;GO:0043412//macromolecule modification;GO:0006950//response to stress;GO:0006955//immune response;GO:0044238//primary metabolic process;GO:0002376//immune system process;GO:0065007//biological regulation;GO:0044237//cellular metabolic process;GO:0045087//innate immune response;GO:0006464//cellular protein modification proce…
UNIGENE0002435	ID_1270	6	PREDICTED: uncharacterized protein LOC103493357 [Cucumis melo]	-	-	-	-
UNIGENE0002436	ID_1271	9	--	-	-	-	-
UNIGENE0002437	ID_1272	20	--	-	-	-	-
UNIGENE0002438	ID_1273	21	PREDICTED: transcription factor MYB44-like [Cucumis sativus]	-	-	GO:1901363//heterocyclic compound binding;GO:0005488//binding;GO:0003676//nucleic acid binding;GO:0097159//organic cyclic compound binding	-
UNIGENE0002442	ID_1274	10	hypothetical protein AMTR_s00046p00231970 [Amborella trichopoda]	-	-	-	-
UNIGENE0002448	ID_1275	20	PREDICTED: mitogen-activated protein kinase kinase 5-like [Cucumis melo]	ko04626//Plant-pathogen interaction//Environmental adaptation//Organismal Systems	GO:0043229//intracellular organelle;GO:0043231//intracellular membrane-bounded organelle;GO:0009532//plastid stroma;GO:0043226//organelle;GO:0005737//cytoplasm;GO:0044446//intracellular organelle part;GO:0005622//intracellular;GO:0044435//plastid part;GO:0044464//cell part;GO:0044444//cytoplasmic part;GO:0009536//plastid;GO:0044424//intracellular part;GO:0005623//cell;GO:0044422//organelle part;G…	GO:0005488//binding;GO:0016301//kinase activity;GO:0032550//purine ribonucleoside binding;GO:0004672//protein kinase activity;GO:1901363//heterocyclic compound binding;GO:0001882//nucleoside binding;GO:0004712//protein serine/threonine/tyrosine kinase activity;GO:0036094//small molecule binding;GO:0097159//organic cyclic compound binding;GO:0003824//catalytic activity;GO:0016740//transferase acti…	GO:0042221//response to chemical;GO:0006605//protein targeting;GO:0071495//cellular response to endogenous stimulus;GO:0033554//cellular response to stress;GO:0010375//stomatal complex patterning;GO:0051179//localization;GO:0006952//defense response;GO:0006793//phosphorus metabolic process;GO:0001101//response to acid chemical;GO:0050794//regulation of cellular process;GO:0051246//regulation of p…
UNIGENE0002449	ID_1276	1	--	-	-	-	-
UNIGENE0002450	ID_1277	12	--	-	-	-	-
UNIGENE0002452	ID_1278	12	--	-	-	-	-
UNIGENE0002453	ID_1279	12	--	-	-	-	-
UNIGENE0002455	ID_1280	8	Dihydrolipoyllysine-residue acetyltransferase component 3 of pyruvate dehydrogenase complex [Morus notabilis]	-	-	-	-
UNIGENE0002457	ID_1281	12	--	-	-	-	-
UNIGENE0002458	ID_1282	21	--	-	-	-	-
UNIGENE0002459	ID_1283	6	--	-	-	-	-
UNIGENE0002460	ID_1284	5	--	-	-	-	-
UNIGENE0002465	ID_1285	6	--	-	-	-	-
UNIGENE0002466	ID_1286	11	Ty3/gypsy retrotransposon protein [Beta vulgaris subsp. vulgaris]	-	-	-	-
UNIGENE0002467	ID_1287	14	--	-	-	-	-
UNIGENE0002468	ID_1288	3	--	-	-	-	-
UNIGENE0002469	ID_1289	23	PREDICTED: linoleate 13S-lipoxygenase 2-1, chloroplastic-like [Cucumis melo]	ko00592//alpha-Linolenic acid metabolism//Lipid metabolism//Metabolism;ko00591//Linoleic acid metabolism//Lipid metabolism//Metabolism	-	GO:0016491//oxidoreductase activity;GO:0003824//catalytic activity	GO:0008152//metabolic process;GO:0044699//single-organism process;GO:0044710//single-organism metabolic process
UNIGENE0002471	ID_1290	3	PREDICTED: corepressor interacting with RBPJ 1-like [Jatropha curcas]	-	-	-	-
UNIGENE0002474	ID_1291	5	--	-	-	-	-
UNIGENE0002476	ID_1292	12	PREDICTED: (3S,6E)-nerolidol synthase 1-like [Cucumis sativus]	ko00902//Monoterpenoid biosynthesis//Metabolism of terpenoids and polyketides//Metabolism	GO:0005737//cytoplasm;GO:0044444//cytoplasmic part;GO:0044424//intracellular part;GO:0044464//cell part;GO:0005623//cell;GO:0005622//intracellular	GO:0005488//binding;GO:0016838//carbon-oxygen lyase activity, acting on phosphates;GO:0016829//lyase activity;GO:0046872//metal ion binding;GO:0043169//cation binding;GO:0016835//carbon-oxygen lyase activity;GO:0043167//ion binding;GO:0003824//catalytic activity	GO:0071704//organic substance metabolic process;GO:0044710//single-organism metabolic process;GO:0006721//terpenoid metabolic process;GO:0006720//isoprenoid metabolic process;GO:0044237//cellular metabolic process;GO:0006629//lipid metabolic process;GO:0044238//primary metabolic process;GO:0044699//single-organism process;GO:0044763//single-organism cellular process;GO:0044255//cellular lipid met…
UNIGENE0002480	ID_1293	7	--	-	-	-	-
UNIGENE0002481	ID_1294	17	PREDICTED: malonyl-CoA:anthocyanidin 5-O-glucoside-6''-O-malonyltransferase-like [Cucumis melo]	-	-	GO:0016740//transferase activity;GO:0003824//catalytic activity	-
UNIGENE0002483	ID_1295	3	--	-	-	-	-
UNIGENE0002484	ID_1296	12	--	-	-	-	-
UNIGENE0002485	ID_1297	3	--	-	-	-	-
UNIGENE0002486	ID_1298	7	ty3-gypsy retrotransposon protein [Cucumis melo subsp. melo]	-	-	-	GO:0071704//organic substance metabolic process;GO:0006725//cellular aromatic compound metabolic process;GO:1901576//organic substance biosynthetic process;GO:0044249//cellular biosynthetic process;GO:0009059//macromolecule biosynthetic process;GO:0009987//cellular process;GO:1901360//organic cyclic compound metabolic process;GO:0044238//primary metabolic process;GO:0044271//cellular nitrogen com…
UNIGENE0002487	ID_1299	6	--	-	-	-	-
UNIGENE0002488	ID_1300	12	--	-	-	-	-
UNIGENE0002489	ID_1301	12	--	-	-	-	-
UNIGENE0002490	ID_1302	12	hypothetical protein L484_005228 [Morus notabilis]	-	-	-	-
UNIGENE0002491	ID_1303	12	--	-	-	-	-
UNIGENE0002492	ID_1304	12	--	-	-	-	-
UNIGENE0002494	ID_1305	7	--	-	-	-	-
UNIGENE0002495	ID_1306	12	PREDICTED: uncharacterized acetyltransferase At3g50280-like [Cucumis melo]	-	-	GO:0003824//catalytic activity;GO:0016740//transferase activity;GO:0016746//transferase activity, transferring acyl groups	-
UNIGENE0002498	ID_1307	12	PREDICTED: AP-1 complex subunit sigma-2 [Cucumis melo]	-	GO:0043234//protein complex;GO:0032991//macromolecular complex	GO:0005215//transporter activity;GO:0022892//substrate-specific transporter activity	GO:0008104//protein localization;GO:0071702//organic substance transport;GO:0051179//localization;GO:0045184//establishment of protein localization;GO:0006810//transport;GO:0015031//protein transport;GO:0051234//establishment of localization;GO:0033036//macromolecule localization
UNIGENE0002500	ID_1308	12	--	-	-	-	-
UNIGENE0002502	ID_1309	15	PREDICTED: protein YLS9-like [Cucumis melo]	-	-	-	GO:0051716//cellular response to stimulus;GO:0007165//signal transduction;GO:0050789//regulation of biological process;GO:0007154//cell communication;GO:0044699//single-organism process;GO:0065007//biological regulation;GO:0044700//single organism signaling;GO:0050896//response to stimulus;GO:0009987//cellular process;GO:0023052//signaling;GO:0035556//intracellular signal transduction;GO:0044763/…
UNIGENE0002503	ID_1310	21	PREDICTED: B3 domain-containing transcription factor VRN1-like [Cucumis sativus]	-	-	GO:0003676//nucleic acid binding;GO:0005488//binding;GO:0097159//organic cyclic compound binding;GO:1901363//heterocyclic compound binding	-
UNIGENE0002504	ID_1311	0	--	-	-	-	-
UNIGENE0002505	ID_1312	10	PREDICTED: dehydration-responsive element-binding protein 1A [Cucumis sativus]	-	GO:0043229//intracellular organelle;GO:0044424//intracellular part;GO:0005622//intracellular;GO:0043227//membrane-bounded organelle;GO:0044464//cell part;GO:0043226//organelle;GO:0005623//cell;GO:0043231//intracellular membrane-bounded organelle	GO:0001071//nucleic acid binding transcription factor activity;GO:0005488//binding;GO:1901363//heterocyclic compound binding;GO:0003676//nucleic acid binding;GO:0097159//organic cyclic compound binding	GO:0044249//cellular biosynthetic process;GO:1901576//organic substance biosynthetic process;GO:0034645//cellular macromolecule biosynthetic process;GO:0010468//regulation of gene expression;GO:0009059//macromolecule biosynthetic process;GO:0044237//cellular metabolic process;GO:0065007//biological regulation;GO:0050789//regulation of biological process;GO:0009987//cellular process;GO:0019222//re…
UNIGENE0002506	ID_1313	7	--	-	-	-	-
UNIGENE0002509	ID_1314	14	--	-	-	-	-
UNIGENE0002510	ID_1315	12	--	-	-	-	-
UNIGENE0002511	ID_1316	22	UP-9A [Nicotiana tabacum]	-	-	-	-
UNIGENE0002512	ID_1317	18	PREDICTED: probable arabinosyltransferase ARAD1 isoform X2 [Cucumis melo]	-	-	-	-
UNIGENE0002514	ID_1318	12	PREDICTED: ABC transporter B family member 11-like [Prunus mume]	-	-	GO:0097159//organic cyclic compound binding;GO:0043167//ion binding;GO:0043169//cation binding;GO:0046914//transition metal ion binding;GO:0046872//metal ion binding;GO:0005488//binding	GO:0008152//metabolic process;GO:0009987//cellular process;GO:0044238//primary metabolic process;GO:1901360//organic cyclic compound metabolic process;GO:0043170//macromolecule metabolic process;GO:0044237//cellular metabolic process;GO:0046483//heterocycle metabolic process;GO:0006139//nucleobase-containing compound metabolic process;GO:0034641//cellular nitrogen compound metabolic process;GO:00…
UNIGENE0002515	ID_1319	15	--	-	-	-	-
UNIGENE0002516	ID_1320	18	hypothetical protein VITISV_038986 [Vitis vinifera]	-	-	-	-
UNIGENE0002517	ID_1321	4	--	-	-	-	-
UNIGENE0002522	ID_1322	12	--	-	-	-	-
UNIGENE0002523	ID_1323	3	--	-	-	-	-
UNIGENE0002524	ID_1324	15	PREDICTED: uncharacterized membrane protein YMR155W-like [Citrus sinensis]	-	GO:0044425//membrane part;GO:0031224//intrinsic component of membrane;GO:0016020//membrane	-	GO:0044699//single-organism process;GO:0009987//cellular process;GO:0044763//single-organism cellular process
UNIGENE0002526	ID_1325	10	PREDICTED: protein SUPPRESSOR OF GENE SILENCING 3 [Cucumis melo]	-	-	-	GO:0060255//regulation of macromolecule metabolic process;GO:0010629//negative regulation of gene expression;GO:0009892//negative regulation of metabolic process;GO:0019222//regulation of metabolic process;GO:0048519//negative regulation of biological process;GO:0009987//cellular process;GO:0044699//single-organism process;GO:0065007//biological regulation;GO:0010468//regulation of gene expressio…
UNIGENE0002527	ID_1326	12	--	-	-	-	-
UNIGENE0002528	ID_1327	12	--	-	-	-	-
UNIGENE0002530	ID_1328	7	--	-	-	-	-
UNIGENE0002531	ID_1329	12	PREDICTED: thaumatin-like protein [Cucumis melo]	-	-	-	-
UNIGENE0002533	ID_1330	21	PREDICTED: BAHD acyltransferase DCR [Cucumis sativus]	-	GO:0005623//cell;GO:0044444//cytoplasmic part;GO:0044424//intracellular part;GO:0005622//intracellular;GO:0044464//cell part;GO:0005737//cytoplasm	GO:0016747//transferase activity, transferring acyl groups other than amino-acyl groups;GO:0016740//transferase activity;GO:0003824//catalytic activity;GO:0016746//transferase activity, transferring acyl groups	GO:0032989//cellular component morphogenesis;GO:0048869//cellular developmental process;GO:0016043//cellular component organization;GO:0009987//cellular process;GO:0048729//tissue morphogenesis;GO:0071840//cellular component organization or biogenesis;GO:0000902//cell morphogenesis;GO:0032502//developmental process;GO:0009888//tissue development;GO:0009653//anatomical structure morphogenesis;GO:0…
UNIGENE0002536	ID_1331	20	--	-	-	-	-
UNIGENE0002538	ID_1332	2	--	-	-	-	-
UNIGENE0002540	ID_1333	9	--	-	-	-	-
UNIGENE0002541	ID_1334	12	--	-	-	-	-
UNIGENE0002542	ID_1335	12	PREDICTED: vacuolar amino acid transporter 1-like [Cucumis sativus]	-	-	-	-
UNIGENE0002543	ID_1336	4	--	-	-	-	-
UNIGENE0002544	ID_1337	10	--	-	-	-	-
UNIGENE0002545	ID_1338	7	PREDICTED: uncharacterized protein LOC103497324 [Cucumis melo]	ko04144//Endocytosis//Transport and catabolism//Cellular Processes	-	-	-
UNIGENE0002546	ID_1339	7	--	-	-	-	-
UNIGENE0002547	ID_1340	12	--	-	-	-	-
UNIGENE0002551	ID_1341	7	--	-	-	-	-
UNIGENE0002553	ID_1342	9	PREDICTED: phosphoinositide phosphatase SAC3 [Cucumis sativus]	-	-	GO:0003824//catalytic activity;GO:0016787//hydrolase activity;GO:0016788//hydrolase activity, acting on ester bonds	GO:0009987//cellular process;GO:0006650//glycerophospholipid metabolic process;GO:0044699//single-organism process;GO:0046474//glycerophospholipid biosynthetic process;GO:0008610//lipid biosynthetic process;GO:0046488//phosphatidylinositol metabolic process;GO:0044763//single-organism cellular process;GO:0009058//biosynthetic process;GO:0008152//metabolic process;GO:0008654//phospholipid biosynth…
UNIGENE0002554	ID_1343	20	PREDICTED: cold shock protein 1-like [Brachypodium distachyon]	-	-	GO:0005488//binding	-
UNIGENE0002556	ID_1344	20	PREDICTED: protein O-glucosyltransferase 1-like [Cucumis melo]	ko00514//Other types of O-glycan biosynthesis//Glycan biosynthesis and metabolism//Metabolism	-	-	-
UNIGENE0002557	ID_1345	20	--	-	-	-	-
UNIGENE0002560	ID_1346	8	PREDICTED: rop guanine nucleotide exchange factor 3-like isoform X2 [Cucumis sativus]	-	-	GO:0005085//guanyl-nucleotide exchange factor activity;GO:0005088//Ras guanyl-nucleotide exchange factor activity;GO:0098772//molecular function regulator	GO:0046578//regulation of Ras protein signal transduction;GO:0035020//regulation of Rac protein signal transduction;GO:0065009//regulation of molecular function;GO:0010646//regulation of cell communication;GO:1902531//regulation of intracellular signal transduction;GO:0065007//biological regulation;GO:0051336//regulation of hydrolase activity;GO:0035023//regulation of Rho protein signal transduct…
UNIGENE0002562	ID_1347	15	--	-	-	-	-
UNIGENE0002563	ID_1348	3	TonB box, N-terminal [Medicago truncatula]	-	-	-	-
UNIGENE0002566	ID_1349	21	PREDICTED: probable LRR receptor-like serine/threonine-protein kinase At3g47570 [Cucumis melo]	-	GO:0016020//membrane	GO:0001882//nucleoside binding;GO:0036094//small molecule binding;GO:0016740//transferase activity;GO:0097367//carbohydrate derivative binding;GO:0032550//purine ribonucleoside binding;GO:0016773//phosphotransferase activity, alcohol group as acceptor;GO:0032549//ribonucleoside binding;GO:0016772//transferase activity, transferring phosphorus-containing groups;GO:0016491//oxidoreductase activity;…	GO:0043412//macromolecule modification;GO:0044238//primary metabolic process;GO:0044267//cellular protein metabolic process;GO:0044237//cellular metabolic process;GO:0008152//metabolic process;GO:0043170//macromolecule metabolic process;GO:0006793//phosphorus metabolic process;GO:0006796//phosphate-containing compound metabolic process;GO:0044260//cellular macromolecule metabolic process;GO:00195…
UNIGENE0002568	ID_1350	14	PREDICTED: zinc finger CCHC domain-containing protein 9 [Cucumis sativus]	-	GO:0005622//intracellular;GO:0044464//cell part;GO:0005623//cell	GO:0043167//ion binding;GO:0046872//metal ion binding;GO:0046914//transition metal ion binding;GO:0097159//organic cyclic compound binding;GO:0043169//cation binding;GO:0005488//binding	GO:0044763//single-organism cellular process;GO:0044699//single-organism process;GO:0009987//cellular process
UNIGENE0002569	ID_1351	6	--	-	-	-	-
UNIGENE0002570	ID_1352	6	At1g70780/F5A18_4 [Arabidopsis thaliana]	-	-	-	-
UNIGENE0002571	ID_1353	10	protein EARLY RESPONSIVE TO DEHYDRATION 15-like [Cucumis sativus]	-	GO:0005623//cell;GO:0044424//intracellular part;GO:0005622//intracellular;GO:0044464//cell part	-	GO:0042743//hydrogen peroxide metabolic process;GO:0071704//organic substance metabolic process;GO:0071840//cellular component organization or biogenesis;GO:0006970//response to osmotic stress;GO:0008104//protein localization;GO:1902578//single-organism localization;GO:0032787//monocarboxylic acid metabolic process;GO:0042044//fluid transport;GO:0044699//single-organism process;GO:0051234//establ…
UNIGENE0002572	ID_1354	4	PREDICTED: NAC domain-containing protein 86 [Cucumis sativus]	-	-	GO:0097159//organic cyclic compound binding;GO:0003676//nucleic acid binding;GO:1901363//heterocyclic compound binding;GO:0005488//binding	GO:0010468//regulation of gene expression;GO:0065007//biological regulation;GO:0050789//regulation of biological process;GO:0060255//regulation of macromolecule metabolic process;GO:0019222//regulation of metabolic process
UNIGENE0002578	ID_1355	9	pore-forming toxin-like protein Hfr-2 [Triticum aestivum]	-	-	-	-
UNIGENE0002580	ID_1356	1	endonuclease/exonuclease/phosphatase family protein [Medicago truncatula]	-	-	-	-
UNIGENE0002581	ID_1357	10	PREDICTED: LOW QUALITY PROTEIN: NAC transcription factor 29-like [Cucumis melo]	-	-	GO:0003676//nucleic acid binding;GO:0005488//binding;GO:0097159//organic cyclic compound binding;GO:1901363//heterocyclic compound binding	GO:0019222//regulation of metabolic process;GO:0050789//regulation of biological process;GO:0060255//regulation of macromolecule metabolic process;GO:0065007//biological regulation;GO:0044237//cellular metabolic process;GO:0009987//cellular process;GO:0008152//metabolic process;GO:0010468//regulation of gene expression;GO:0044699//single-organism process
UNIGENE0002583	ID_1358	4	PREDICTED: F-box protein SKIP23 isoform X1 [Cucumis sativus]	-	-	-	-
UNIGENE0002586	ID_1359	2	PREDICTED: zinc finger protein 7-like [Cucumis melo]	-	-	GO:0005488//binding;GO:0097159//organic cyclic compound binding;GO:0043167//ion binding;GO:0043169//cation binding	-
UNIGENE0002587	ID_1360	18	PREDICTED: probable WRKY transcription factor 48 [Cucumis sativus]	-	-	GO:0003677//DNA binding;GO:0005488//binding;GO:0097159//organic cyclic compound binding;GO:1901363//heterocyclic compound binding;GO:0001071//nucleic acid binding transcription factor activity;GO:0003676//nucleic acid binding	GO:0010468//regulation of gene expression;GO:0019222//regulation of metabolic process;GO:0060255//regulation of macromolecule metabolic process;GO:0050789//regulation of biological process;GO:0065007//biological regulation
UNIGENE0002589	ID_1361	4	basic secretory protein family protein [Arabidopsis thaliana]	-	-	-	-
UNIGENE0002590	ID_1362	10	--	-	-	-	-
UNIGENE0002594	ID_1363	12	PREDICTED: zinc finger protein 6-like [Cucumis melo]	-	-	GO:0097159//organic cyclic compound binding;GO:0005488//binding;GO:0043169//cation binding;GO:0043167//ion binding	-
UNIGENE0002596	ID_1364	25	Syringolide-induced protein 14-1-1 [Medicago truncatula]	-	-	-	-
UNIGENE0002598	ID_1365	14	--	-	-	-	-
UNIGENE0002606	ID_1366	12	--	-	-	-	-
UNIGENE0002607	ID_1367	3	--	-	-	-	-
UNIGENE0002610	ID_1368	12	--	-	-	-	-
UNIGENE0002612	ID_1369	13	Tumor necrosis factor receptor superfamily member 21 [Theobroma cacao]	-	-	-	GO:0006725//cellular aromatic compound metabolic process;GO:0006807//nitrogen compound metabolic process;GO:0006139//nucleobase-containing compound metabolic process;GO:0008152//metabolic process;GO:0090304//nucleic acid metabolic process;GO:0071704//organic substance metabolic process;GO:0009987//cellular process;GO:0034641//cellular nitrogen compound metabolic process;GO:0016072//rRNA metabolic…
UNIGENE0002613	ID_1370	18	--	-	-	-	-
UNIGENE0002614	ID_1371	15	--	-	-	-	-
UNIGENE0002617	ID_1372	12	PREDICTED: growth-regulating factor 1-like [Camelina sativa]	-	-	-	-
UNIGENE0002618	ID_1373	12	PREDICTED: uncharacterized protein LOC104439750 [Eucalyptus grandis]	-	-	-	-
UNIGENE0002621	ID_1374	5	--	-	-	-	-
UNIGENE0002622	ID_1375	7	--	-	-	-	-
UNIGENE0002627	ID_1376	11	viral movement protein [Medicago truncatula]	-	-	-	-
UNIGENE0002631	ID_1377	17	BnaCnng00490D [Brassica napus]	-	-	-	-
UNIGENE0002632	ID_1378	12	BnaCnng00490D [Brassica napus]	-	-	-	-
UNIGENE0002633	ID_1379	9	--	-	-	-	-
UNIGENE0002641	ID_1380	15	PREDICTED: stress enhanced protein 1, chloroplastic [Cucumis melo]	-	GO:0034357//photosynthetic membrane;GO:0044444//cytoplasmic part;GO:0043226//organelle;GO:0044464//cell part;GO:0044446//intracellular organelle part;GO:0009521//photosystem;GO:0044435//plastid part;GO:0009579//thylakoid;GO:0005737//cytoplasm;GO:0044422//organelle part;GO:0043234//protein complex;GO:0044434//chloroplast part;GO:0043229//intracellular organelle;GO:0009507//chloroplast;GO:0009536//…	GO:0046906//tetrapyrrole binding;GO:0005488//binding;GO:1901363//heterocyclic compound binding;GO:0097159//organic cyclic compound binding	GO:0034641//cellular nitrogen compound metabolic process;GO:0043436//oxoacid metabolic process;GO:0044237//cellular metabolic process;GO:0044281//small molecule metabolic process;GO:0043623//cellular protein complex assembly;GO:0006461//protein complex assembly;GO:0043269//regulation of ion transport;GO:1901700//response to oxygen-containing compound;GO:0034660//ncRNA metabolic process;GO:0006732…
UNIGENE0002644	ID_1381	11	PREDICTED: probable S-adenosylmethionine-dependent methyltransferase At5g38100 [Cucumis sativus]	-	-	GO:0016740//transferase activity;GO:0008168//methyltransferase activity;GO:0003824//catalytic activity;GO:0016741//transferase activity, transferring one-carbon groups	GO:0008152//metabolic process
UNIGENE0002646	ID_1382	3	--	-	-	-	-
UNIGENE0002649	ID_1383	4	--	-	-	-	-
UNIGENE0002650	ID_1384	3	--	-	-	-	-
UNIGENE0002652	ID_1385	21	--	-	-	-	-
UNIGENE0002653	ID_1386	7	--	-	-	-	-
UNIGENE0002656	ID_1387	12	--	-	-	-	-
UNIGENE0002657	ID_1388	7	hypothetical protein [Cucumis melo subsp. melo]	-	-	-	-
UNIGENE0002658	ID_1389	12	hypothetical protein L484_022412 [Morus notabilis]	-	-	-	-
UNIGENE0002659	ID_1390	12	--	-	-	-	-
UNIGENE0002661	ID_1391	25	PREDICTED: 2-hydroxyacyl-CoA lyase [Cucumis melo]	ko04146//Peroxisome//Transport and catabolism//Cellular Processes	GO:0005737//cytoplasm;GO:0005622//intracellular;GO:0044464//cell part;GO:0044424//intracellular part;GO:0005623//cell;GO:0044444//cytoplasmic part	GO:0043167//ion binding;GO:0003824//catalytic activity;GO:0016830//carbon-carbon lyase activity;GO:0005488//binding;GO:0016829//lyase activity;GO:0036094//small molecule binding;GO:0019842//vitamin binding;GO:0046872//metal ion binding;GO:0043169//cation binding	GO:0009404//toxin metabolic process;GO:0014070//response to organic cyclic compound;GO:0019752//carboxylic acid metabolic process;GO:0044281//small molecule metabolic process;GO:0009987//cellular process;GO:0044763//single-organism cellular process;GO:0050896//response to stimulus;GO:0044237//cellular metabolic process;GO:0044710//single-organism metabolic process;GO:0044238//primary metabolic pr…
UNIGENE0002662	ID_1392	14	PREDICTED: 2-hydroxyacyl-CoA lyase [Cucumis sativus]	ko04146//Peroxisome//Transport and catabolism//Cellular Processes	GO:0044464//cell part;GO:0005623//cell;GO:0005737//cytoplasm;GO:0044444//cytoplasmic part;GO:0005622//intracellular;GO:0044424//intracellular part	GO:0003824//catalytic activity;GO:0043169//cation binding;GO:0036094//small molecule binding;GO:0005488//binding;GO:0016830//carbon-carbon lyase activity;GO:0016829//lyase activity;GO:0046872//metal ion binding;GO:0019842//vitamin binding;GO:0043167//ion binding	GO:0044237//cellular metabolic process;GO:0050896//response to stimulus;GO:0044699//single-organism process;GO:1901564//organonitrogen compound metabolic process;GO:1901360//organic cyclic compound metabolic process;GO:0006725//cellular aromatic compound metabolic process;GO:0044238//primary metabolic process;GO:0043436//oxoacid metabolic process;GO:0006082//organic acid metabolic process;GO:0006…
UNIGENE0002663	ID_1393	12	--	-	-	-	-
UNIGENE0002664	ID_1394	21	PREDICTED: UDP-glycosyltransferase 76E2-like [Cucumis melo]	-	-	GO:0016740//transferase activity;GO:0003824//catalytic activity;GO:0016757//transferase activity, transferring glycosyl groups	-
UNIGENE0002665	ID_1395	17	--	-	-	-	-
UNIGENE0002668	ID_1396	17	S-adenosyl-L-methionine-dependent methyltransferases superfamily protein isoform 2 [Theobroma cacao]	-	-	GO:0016741//transferase activity, transferring one-carbon groups;GO:0016740//transferase activity;GO:0003824//catalytic activity	GO:0008152//metabolic process
UNIGENE0002669	ID_1397	23	S-adenosyl-L-methionine-dependent methyltransferases superfamily protein isoform 2 [Theobroma cacao]	-	-	GO:0016740//transferase activity;GO:0003824//catalytic activity;GO:0016741//transferase activity, transferring one-carbon groups	GO:0008152//metabolic process
UNIGENE0002670	ID_1398	12	--	-	-	-	-
UNIGENE0002673	ID_1399	17	hypothetical protein Csa_1G257330 [Cucumis sativus]	-	-	-	-
UNIGENE0002680	ID_1400	4	Os01g0116166 [Oryza sativa Japonica Group]	ko02010//ABC transporters//Membrane transport//Environmental Information Processing	-	GO:0005488//binding;GO:0043169//cation binding;GO:0043167//ion binding;GO:0097159//organic cyclic compound binding;GO:0046914//transition metal ion binding;GO:0046872//metal ion binding	GO:0044238//primary metabolic process;GO:0009987//cellular process;GO:0034641//cellular nitrogen compound metabolic process;GO:0044260//cellular macromolecule metabolic process;GO:0043170//macromolecule metabolic process;GO:0006725//cellular aromatic compound metabolic process;GO:0044237//cellular metabolic process;GO:0006139//nucleobase-containing compound metabolic process;GO:0008152//metabolic…
UNIGENE0002682	ID_1401	7	--	-	-	-	-
UNIGENE0002683	ID_1402	3	PREDICTED: uncharacterized protein LOC103498514 [Cucumis melo]	ko03010//Ribosome//Translation//Genetic Information Processing	-	-	-
UNIGENE0002685	ID_1403	15	--	-	-	-	-
UNIGENE0002691	ID_1404	12	--	-	-	-	-
UNIGENE0002693	ID_1405	9	PREDICTED: transmembrane emp24 domain-containing protein p24delta3-like [Cucumis sativus]	-	GO:0031224//intrinsic component of membrane;GO:0044425//membrane part;GO:0016020//membrane	GO:0003824//catalytic activity	GO:0051179//localization;GO:0051234//establishment of localization
UNIGENE0002695	ID_1406	12	--	-	-	-	-
UNIGENE0002698	ID_1407	19	PREDICTED: protein YLS9 [Cucumis sativus]	-	-	-	GO:0007154//cell communication;GO:0042221//response to chemical;GO:0001101//response to acid chemical;GO:0070887//cellular response to chemical stimulus;GO:0043067//regulation of programmed cell death;GO:0050794//regulation of cellular process;GO:0009607//response to biotic stimulus;GO:0051716//cellular response to stimulus;GO:0044699//single-organism process;GO:1901700//response to oxygen-contai…
UNIGENE0002699	ID_1408	11	--	-	-	-	-
UNIGENE0002700	ID_1409	12	--	-	-	-	-
UNIGENE0002702	ID_1410	2	PREDICTED: transcription factor TGA6-like [Cucumis sativus]	-	-	GO:0003677//DNA binding;GO:1901363//heterocyclic compound binding;GO:0005488//binding;GO:0097159//organic cyclic compound binding;GO:0003676//nucleic acid binding	GO:0044249//cellular biosynthetic process;GO:1901576//organic substance biosynthetic process;GO:0044260//cellular macromolecule metabolic process;GO:0009058//biosynthetic process;GO:0008152//metabolic process;GO:0044237//cellular metabolic process;GO:0009059//macromolecule biosynthetic process;GO:0009987//cellular process;GO:0071704//organic substance metabolic process;GO:0034645//cellular macrom…
UNIGENE0002704	ID_1411	24	PREDICTED: agamous-like MADS-box protein AGL6 [Cucumis sativus]	-	GO:0043226//organelle;GO:0043227//membrane-bounded organelle;GO:0005623//cell;GO:0043231//intracellular membrane-bounded organelle;GO:0044464//cell part;GO:0005622//intracellular;GO:0043229//intracellular organelle;GO:0044424//intracellular part	GO:0003824//catalytic activity;GO:1901363//heterocyclic compound binding;GO:0016627//oxidoreductase activity, acting on the CH-CH group of donors;GO:0016628//oxidoreductase activity, acting on the CH-CH group of donors, NAD or NADP as acceptor;GO:0005488//binding;GO:0016491//oxidoreductase activity;GO:0005515//protein binding;GO:0001071//nucleic acid binding transcription factor activity;GO:00036…	GO:0009058//biosynthetic process;GO:1901576//organic substance biosynthetic process;GO:0034645//cellular macromolecule biosynthetic process;GO:0044249//cellular biosynthetic process;GO:0009059//macromolecule biosynthetic process;GO:0044699//single-organism process;GO:0009987//cellular process;GO:0044710//single-organism metabolic process;GO:0050789//regulation of biological process;GO:0065007//bi…
UNIGENE0002705	ID_1412	4	--	-	-	-	-
UNIGENE0002707	ID_1413	17	PREDICTED: two-pore potassium channel 3 [Cucumis sativus]	-	GO:0016020//membrane;GO:0031224//intrinsic component of membrane;GO:0044425//membrane part	GO:0005216//ion channel activity;GO:0005215//transporter activity;GO:0015267//channel activity;GO:0022838//substrate-specific channel activity;GO:0022803//passive transmembrane transporter activity;GO:0015075//ion transmembrane transporter activity;GO:0008324//cation transmembrane transporter activity;GO:0022891//substrate-specific transmembrane transporter activity;GO:0022857//transmembrane tran…	GO:0044765//single-organism transport;GO:0044763//single-organism cellular process;GO:1902578//single-organism localization;GO:0006810//transport;GO:0051234//establishment of localization;GO:0009987//cellular process;GO:0044699//single-organism process;GO:0006811//ion transport;GO:0034220//ion transmembrane transport;GO:0051179//localization;GO:0055085//transmembrane transport
UNIGENE0002708	ID_1414	6	--	-	-	-	-
UNIGENE0002711	ID_1415	3	spindle pole body component protein [Gossypium arboreum]	-	-	-	-
UNIGENE0002716	ID_1416	6	--	-	-	-	-
UNIGENE0002721	ID_1417	15	--	-	-	-	-
UNIGENE0002722	ID_1418	12	--	-	-	-	-
UNIGENE0002726	ID_1419	20	PREDICTED: hydroxymethylglutaryl-CoA synthase [Cucumis sativus]	ko00280//Valine, leucine and isoleucine degradation//Amino acid metabolism//Metabolism;ko00900//Terpenoid backbone biosynthesis//Metabolism of terpenoids and polyketides//Metabolism;ko00650//Butanoate metabolism//Carbohydrate metabolism//Metabolism;ko00072//Synthesis and degradation of ketone bodies//Lipid metabolism//Metabolism	GO:0005911//cell-cell junction;GO:0044444//cytoplasmic part;GO:0044424//intracellular part;GO:0030054//cell junction;GO:0005737//cytoplasm;GO:0005622//intracellular;GO:0044464//cell part;GO:0005623//cell	GO:0003824//catalytic activity;GO:0016746//transferase activity, transferring acyl groups;GO:0046912//transferase activity, transferring acyl groups, acyl groups converted into alkyl on transfer;GO:0016740//transferase activity	GO:0009987//cellular process;GO:0071704//organic substance metabolic process;GO:0006720//isoprenoid metabolic process;GO:0051186//cofactor metabolic process;GO:0044763//single-organism cellular process;GO:1901576//organic substance biosynthetic process;GO:0008202//steroid metabolic process;GO:0006637//acyl-CoA metabolic process;GO:0044255//cellular lipid metabolic process;GO:0006084//acetyl-CoA m…
UNIGENE0002727	ID_1420	20	hydroxymethylglutaryl-CoA synthase [Siraitia grosvenorii]	ko00280//Valine, leucine and isoleucine degradation//Amino acid metabolism//Metabolism;ko00900//Terpenoid backbone biosynthesis//Metabolism of terpenoids and polyketides//Metabolism;ko00650//Butanoate metabolism//Carbohydrate metabolism//Metabolism;ko00072//Synthesis and degradation of ketone bodies//Lipid metabolism//Metabolism	GO:0044424//intracellular part;GO:0005622//intracellular;GO:0005737//cytoplasm;GO:0030054//cell junction;GO:0044444//cytoplasmic part;GO:0044464//cell part;GO:0005911//cell-cell junction;GO:0005623//cell	GO:0016746//transferase activity, transferring acyl groups;GO:0003824//catalytic activity;GO:0046912//transferase activity, transferring acyl groups, acyl groups converted into alkyl on transfer;GO:0016740//transferase activity	GO:0044238//primary metabolic process;GO:0006793//phosphorus metabolic process;GO:0006629//lipid metabolic process;GO:0009987//cellular process;GO:0051186//cofactor metabolic process;GO:1901360//organic cyclic compound metabolic process;GO:0009058//biosynthetic process;GO:0006790//sulfur compound metabolic process;GO:0008610//lipid biosynthetic process;GO:0006732//coenzyme metabolic process;GO:00…
UNIGENE0002729	ID_1421	17	Calcium-dependent lipid-binding family protein isoform 3 [Theobroma cacao]	-	-	-	-
UNIGENE0002733	ID_1422	0	--	-	-	-	-
UNIGENE0002734	ID_1423	12	--	-	-	-	-
UNIGENE0002735	ID_1424	12	--	-	-	-	-
UNIGENE0002746	ID_1425	12	--	-	-	-	-
UNIGENE0002748	ID_1426	14	--	-	-	-	-
UNIGENE0002750	ID_1427	6	--	-	-	-	-
UNIGENE0002751	ID_1428	12	--	-	-	-	-
UNIGENE0002752	ID_1429	10	--	-	-	-	-
UNIGENE0002753	ID_1430	3	--	-	-	-	-
UNIGENE0002755	ID_1431	15	PREDICTED: miraculin-like [Cucumis melo]	-	-	GO:0098772//molecular function regulator;GO:0003824//catalytic activity;GO:0016787//hydrolase activity;GO:0061134//peptidase regulator activity;GO:0061135//endopeptidase regulator activity;GO:0030234//enzyme regulator activity	GO:0065009//regulation of molecular function;GO:0052547//regulation of peptidase activity;GO:0010605//negative regulation of macromolecule metabolic process;GO:0050794//regulation of cellular process;GO:0050789//regulation of biological process;GO:0043086//negative regulation of catalytic activity;GO:0030162//regulation of proteolysis;GO:0032268//regulation of cellular protein metabolic process;G…
UNIGENE0002756	ID_1432	6	--	-	-	-	-
UNIGENE0002759	ID_1433	8	PREDICTED: ethylene-responsive transcription factor ERF118-like [Cucumis melo]	-	-	GO:0097159//organic cyclic compound binding;GO:1901363//heterocyclic compound binding;GO:0003676//nucleic acid binding;GO:0005488//binding;GO:0001071//nucleic acid binding transcription factor activity	GO:0065007//biological regulation;GO:0050789//regulation of biological process;GO:0019222//regulation of metabolic process;GO:0060255//regulation of macromolecule metabolic process;GO:0010468//regulation of gene expression
UNIGENE0002763	ID_1434	10	--	-	-	-	-
UNIGENE0002764	ID_1435	10	ribonuclease H-like protein [Arabidopsis thaliana]	-	-	-	-
UNIGENE0002767	ID_1436	7	PREDICTED: LOW QUALITY PROTEIN: serine/threonine-protein kinase Nek4 [Cucumis melo]	-	-	GO:0016740//transferase activity;GO:0005488//binding;GO:0001882//nucleoside binding;GO:0016772//transferase activity, transferring phosphorus-containing groups;GO:0004702//receptor signaling protein serine/threonine kinase activity;GO:0004672//protein kinase activity;GO:0032550//purine ribonucleoside binding;GO:1901363//heterocyclic compound binding;GO:0005057//receptor signaling protein activity…	GO:0007154//cell communication;GO:0048522//positive regulation of cellular process;GO:0043085//positive regulation of catalytic activity;GO:0010604//positive regulation of macromolecule metabolic process;GO:0019222//regulation of metabolic process;GO:0044699//single-organism process;GO:0051716//cellular response to stimulus;GO:0045859//regulation of protein kinase activity;GO:0042325//regulation …
UNIGENE0002768	ID_1437	3	PREDICTED: LOW QUALITY PROTEIN: serine/threonine-protein kinase Nek4 [Cucumis melo]	-	-	GO:0004702//receptor signaling protein serine/threonine kinase activity;GO:0097367//carbohydrate derivative binding;GO:0032550//purine ribonucleoside binding;GO:0005057//receptor signaling protein activity;GO:0004672//protein kinase activity;GO:0016772//transferase activity, transferring phosphorus-containing groups;GO:0060089//molecular transducer activity;GO:0016740//transferase activity;GO:003…	GO:0044700//single organism signaling;GO:0001934//positive regulation of protein phosphorylation;GO:0033674//positive regulation of kinase activity;GO:0023052//signaling;GO:0065009//regulation of molecular function;GO:0001932//regulation of protein phosphorylation;GO:0051246//regulation of protein metabolic process;GO:0010604//positive regulation of macromolecule metabolic process;GO:0019220//reg…
UNIGENE0002770	ID_1438	3	No exine formation 1 isoform 1 [Theobroma cacao]	-	-	-	-
UNIGENE0002771	ID_1439	20	No exine formation 1 isoform 1 [Theobroma cacao]	-	-	-	-
UNIGENE0002773	ID_1440	15	PREDICTED: serine/threonine-protein phosphatase 7 long form homolog [Vitis vinifera]	-	-	-	-
UNIGENE0002775	ID_1441	20	PREDICTED: prostatic spermine-binding protein [Cucumis sativus]	-	-	-	-
UNIGENE0002776	ID_1442	15	PREDICTED: prostatic spermine-binding protein [Cucumis sativus]	-	-	-	-
UNIGENE0002777	ID_1443	22	PREDICTED: prostatic spermine-binding protein [Cucumis sativus]	-	-	-	-
UNIGENE0002779	ID_1444	12	--	-	-	-	-
UNIGENE0002780	ID_1445	16	Class I glutamine amidotransferase-like superfamily protein [Theobroma cacao]	-	-	GO:0003824//catalytic activity;GO:0003676//nucleic acid binding;GO:0097367//carbohydrate derivative binding;GO:0016462//pyrophosphatase activity;GO:0032549//ribonucleoside binding;GO:0005488//binding;GO:0016818//hydrolase activity, acting on acid anhydrides, in phosphorus-containing anhydrides;GO:0016817//hydrolase activity, acting on acid anhydrides;GO:0016887//ATPase activity;GO:1901363//hetero…	GO:0044699//single-organism process;GO:0008152//metabolic process;GO:0044238//primary metabolic process;GO:1901564//organonitrogen compound metabolic process;GO:0019752//carboxylic acid metabolic process;GO:0009987//cellular process;GO:0006082//organic acid metabolic process;GO:0043170//macromolecule metabolic process;GO:0044260//cellular macromolecule metabolic process;GO:0071704//organic substa…
UNIGENE0002783	ID_1446	6	--	-	-	-	-
UNIGENE0002784	ID_1447	12	--	-	-	-	-
UNIGENE0002785	ID_1448	3	PREDICTED: prolyl endopeptidase-like [Cucumis sativus]	-	-	GO:0008233//peptidase activity;GO:0016787//hydrolase activity;GO:0017171//serine hydrolase activity;GO:0070011//peptidase activity, acting on L-amino acid peptides;GO:0008236//serine-type peptidase activity;GO:0004175//endopeptidase activity;GO:0003824//catalytic activity	GO:0019538//protein metabolic process;GO:0044238//primary metabolic process;GO:0008152//metabolic process;GO:0043170//macromolecule metabolic process;GO:0071704//organic substance metabolic process
UNIGENE0002790	ID_1449	6	--	-	-	-	-
UNIGENE0002791	ID_1450	20	PREDICTED: pentatricopeptide repeat-containing protein At1g31430 [Cucumis melo]	-	-	-	-
UNIGENE0002801	ID_1451	5	--	-	-	-	-
UNIGENE0002802	ID_1452	17	--	-	-	-	-
UNIGENE0002803	ID_1453	12	PREDICTED: cytochrome b561 and DOMON domain-containing protein At3g61750 [Cucumis sativus]	-	GO:0016020//membrane;GO:0044425//membrane part;GO:0031224//intrinsic component of membrane	-	GO:0008152//metabolic process;GO:0044710//single-organism metabolic process;GO:0044699//single-organism process
UNIGENE0002804	ID_1454	14	LURP-one-related 6 [Theobroma cacao]	-	-	-	-
UNIGENE0002806	ID_1455	12	--	-	-	-	-
UNIGENE0002809	ID_1456	12	PREDICTED: serine/threonine-protein kinase WNK4 [Cucumis melo]	-	-	-	-
UNIGENE0002812	ID_1457	14	chalcone synthase [Vitis vinifera]	ko04712//Circadian rhythm - plant//Environmental adaptation//Organismal Systems;ko00941//Flavonoid biosynthesis//Biosynthesis of other secondary metabolites//Metabolism	-	GO:0016746//transferase activity, transferring acyl groups;GO:0016740//transferase activity;GO:0016747//transferase activity, transferring acyl groups other than amino-acyl groups;GO:0003824//catalytic activity	GO:0008152//metabolic process
UNIGENE0002814	ID_1458	15	PREDICTED: protein Jade-1 [Cucumis melo]	-	-	GO:0005488//binding;GO:0046914//transition metal ion binding;GO:0046872//metal ion binding;GO:0043167//ion binding;GO:0043169//cation binding	-
UNIGENE0002815	ID_1459	21	hypothetical protein VITISV_040148 [Vitis vinifera]	-	-	-	-
UNIGENE0002817	ID_1460	21	elongation factor 2, partial [Euglena gracilis]	-	-	GO:1901363//heterocyclic compound binding;GO:0036094//small molecule binding;GO:0016787//hydrolase activity;GO:0003824//catalytic activity;GO:0005488//binding;GO:0097159//organic cyclic compound binding	GO:0009058//biosynthetic process;GO:0071704//organic substance metabolic process;GO:0044249//cellular biosynthetic process;GO:0043170//macromolecule metabolic process;GO:0009059//macromolecule biosynthetic process;GO:0044260//cellular macromolecule metabolic process;GO:0044237//cellular metabolic process;GO:0009987//cellular process;GO:1901576//organic substance biosynthetic process;GO:0034645//c…
UNIGENE0002819	ID_1461	12	--	-	-	-	-
UNIGENE0002823	ID_1462	11	--	-	-	-	-
UNIGENE0002824	ID_1463	3	--	-	-	-	-
UNIGENE0002828	ID_1464	6	--	-	-	-	-
UNIGENE0002829	ID_1465	10	Ras-related protein RABE1c [Morus notabilis]	ko04144//Endocytosis//Transport and catabolism//Cellular Processes	-	GO:0036094//small molecule binding;GO:0097159//organic cyclic compound binding;GO:1901363//heterocyclic compound binding;GO:0005488//binding	-
UNIGENE0002830	ID_1466	12	--	-	-	-	-
UNIGENE0002832	ID_1467	5	--	-	-	-	-
UNIGENE0002835	ID_1468	6	Retrovirus-related Pol polyprotein from transposon TNT 1-94, partial [Glycine soja]	-	-	-	-
UNIGENE0002837	ID_1469	12	--	-	-	-	-
UNIGENE0002838	ID_1470	0	--	-	-	-	-
UNIGENE0002840	ID_1471	18	--	-	-	-	-
UNIGENE0002842	ID_1472	12	--	-	-	-	-
UNIGENE0002843	ID_1473	6	--	-	-	-	-
UNIGENE0002845	ID_1474	12	PREDICTED: ribonuclease 1-like [Cucumis sativus]	-	-	GO:0097159//organic cyclic compound binding;GO:0003676//nucleic acid binding;GO:0016788//hydrolase activity, acting on ester bonds;GO:1901363//heterocyclic compound binding;GO:0004540//ribonuclease activity;GO:0016894//endonuclease activity, active with either ribo- or deoxyribonucleic acids and producing 3'-phosphomonoesters;GO:0003824//catalytic activity;GO:0016892//endoribonuclease activity, p…	GO:0006725//cellular aromatic compound metabolic process;GO:0034641//cellular nitrogen compound metabolic process;GO:0009987//cellular process;GO:0046483//heterocycle metabolic process;GO:0090305//nucleic acid phosphodiester bond hydrolysis;GO:0071704//organic substance metabolic process;GO:0090501//RNA phosphodiester bond hydrolysis;GO:0044238//primary metabolic process;GO:0008152//metabolic pro…
UNIGENE0002846	ID_1475	15	PREDICTED: ribonuclease 1-like [Cucumis sativus]	-	-	GO:1901363//heterocyclic compound binding;GO:0097159//organic cyclic compound binding;GO:0004519//endonuclease activity;GO:0016892//endoribonuclease activity, producing 3'-phosphomonoesters;GO:0016788//hydrolase activity, acting on ester bonds;GO:0003676//nucleic acid binding;GO:0004521//endoribonuclease activity;GO:0005488//binding;GO:0004518//nuclease activity;GO:0016894//endonuclease activity,…	GO:0034641//cellular nitrogen compound metabolic process;GO:0009987//cellular process;GO:0043170//macromolecule metabolic process;GO:0046483//heterocycle metabolic process;GO:1901360//organic cyclic compound metabolic process;GO:0044238//primary metabolic process;GO:0008152//metabolic process;GO:0006139//nucleobase-containing compound metabolic process;GO:0071704//organic substance metabolic proc…
UNIGENE0002850	ID_1476	12	--	-	-	-	-
UNIGENE0002853	ID_1477	19	PREDICTED: probable aldo-keto reductase 2 [Cucumis sativus]	-	-	-	-
UNIGENE0002855	ID_1478	24	NADH dehydrogenase subunit 7 [Cucumis sativus]	ko00190//Oxidative phosphorylation//Energy metabolism//Metabolism	GO:0009507//chloroplast;GO:0044434//chloroplast part;GO:0044424//intracellular part;GO:0043231//intracellular membrane-bounded organelle;GO:0044422//organelle part;GO:0005737//cytoplasm;GO:0005622//intracellular;GO:0005623//cell;GO:0044446//intracellular organelle part;GO:0044435//plastid part;GO:0044464//cell part;GO:0044444//cytoplasmic part;GO:0016020//membrane;GO:0043226//organelle;GO:0009536…	GO:1901363//heterocyclic compound binding;GO:0005488//binding;GO:0097159//organic cyclic compound binding;GO:0016651//oxidoreductase activity, acting on NAD(P)H;GO:1901265//nucleoside phosphate binding;GO:0016491//oxidoreductase activity;GO:0003824//catalytic activity;GO:0036094//small molecule binding;GO:0048037//cofactor binding;GO:0000166//nucleotide binding	GO:0044237//cellular metabolic process;GO:0044710//single-organism metabolic process;GO:0008152//metabolic process;GO:0006091//generation of precursor metabolites and energy;GO:0051179//localization;GO:0044699//single-organism process;GO:0009987//cellular process;GO:0051234//establishment of localization
UNIGENE0002856	ID_1479	10	PREDICTED: NADPH-dependent pterin aldehyde reductase-like [Cucumis sativus]	-	-	GO:0016491//oxidoreductase activity;GO:0003824//catalytic activity	GO:0044699//single-organism process;GO:0006082//organic acid metabolic process;GO:0009987//cellular process;GO:0044710//single-organism metabolic process;GO:0044238//primary metabolic process;GO:0044237//cellular metabolic process;GO:0044281//small molecule metabolic process;GO:0008152//metabolic process;GO:0044763//single-organism cellular process;GO:0071704//organic substance metabolic process;…
UNIGENE0002857	ID_1480	12	--	-	-	-	-
UNIGENE0002858	ID_1481	12	--	-	-	-	-
UNIGENE0002859	ID_1482	12	--	-	-	-	-
UNIGENE0002860	ID_1483	12	--	-	-	-	-
UNIGENE0002863	ID_1484	24	BnaA01g20430D [Brassica napus]	-	GO:0044425//membrane part;GO:0031224//intrinsic component of membrane;GO:0016020//membrane	-	-
UNIGENE0002864	ID_1485	21	PREDICTED: cytochrome P450 734A1-like [Cucumis sativus]	ko00905//Brassinosteroid biosynthesis//Metabolism of terpenoids and polyketides//Metabolism	GO:0044425//membrane part;GO:0016020//membrane;GO:0031224//intrinsic component of membrane	GO:0005488//binding;GO:0043167//ion binding;GO:0097159//organic cyclic compound binding;GO:0016627//oxidoreductase activity, acting on the CH-CH group of donors;GO:0016491//oxidoreductase activity;GO:0046872//metal ion binding;GO:1901363//heterocyclic compound binding;GO:0004497//monooxygenase activity;GO:0046914//transition metal ion binding;GO:0003824//catalytic activity;GO:0046906//tetrapyrrol…	GO:0044710//single-organism metabolic process;GO:0009725//response to hormone;GO:0009314//response to radiation;GO:0009719//response to endogenous stimulus;GO:0040007//growth;GO:0010033//response to organic substance;GO:1901615//organic hydroxy compound metabolic process;GO:0042221//response to chemical;GO:0008152//metabolic process;GO:0006629//lipid metabolic process;GO:0071704//organic substanc…
UNIGENE0002865	ID_1486	21	PREDICTED: cytochrome P450 734A1-like [Cucumis melo]	ko00905//Brassinosteroid biosynthesis//Metabolism of terpenoids and polyketides//Metabolism	GO:0031224//intrinsic component of membrane;GO:0044425//membrane part;GO:0016020//membrane	GO:0016627//oxidoreductase activity, acting on the CH-CH group of donors;GO:0046872//metal ion binding;GO:0005488//binding;GO:0043169//cation binding;GO:0043167//ion binding;GO:1901363//heterocyclic compound binding;GO:0046914//transition metal ion binding;GO:0003824//catalytic activity;GO:0046906//tetrapyrrole binding;GO:0016491//oxidoreductase activity;GO:0004497//monooxygenase activity;GO:0097…	GO:0009719//response to endogenous stimulus;GO:0071704//organic substance metabolic process;GO:0008202//steroid metabolic process;GO:0044238//primary metabolic process;GO:0042221//response to chemical;GO:0006629//lipid metabolic process;GO:0050896//response to stimulus;GO:1901615//organic hydroxy compound metabolic process;GO:0008152//metabolic process;GO:0010033//response to organic substance;GO…
UNIGENE0002868	ID_1487	3	--	-	-	-	-
UNIGENE0002869	ID_1488	12	--	-	-	-	-
UNIGENE0002870	ID_1489	21	PREDICTED: pentatricopeptide repeat-containing protein At3g62890-like [Cucumis sativus]	-	-	-	-
UNIGENE0002871	ID_1490	12	Oxidative stress 3 [Theobroma cacao]	-	-	-	-
UNIGENE0002872	ID_1491	21	Oxidative stress 3 [Theobroma cacao]	-	-	-	-
UNIGENE0002874	ID_1492	12	glycine-rich protein-1 [Cucumis sativus]	-	-	-	-
UNIGENE0002876	ID_1493	20	--	-	-	-	-
UNIGENE0002877	ID_1494	12	--	-	-	-	-
UNIGENE0002880	ID_1495	12	--	-	-	-	-
UNIGENE0002882	ID_1496	21	--	-	-	-	-
UNIGENE0002884	ID_1497	12	--	-	-	-	-
UNIGENE0002885	ID_1498	7	--	-	-	-	-
UNIGENE0002887	ID_1499	9	--	-	-	-	-
UNIGENE0002888	ID_1500	7	PREDICTED: (RS)-norcoclaurine 6-O-methyltransferase-like [Cucumis melo]	-	-	GO:0016741//transferase activity, transferring one-carbon groups;GO:0003824//catalytic activity;GO:0005515//protein binding;GO:0005488//binding;GO:0016740//transferase activity;GO:0008168//methyltransferase activity	GO:0008152//metabolic process
UNIGENE0002889	ID_1501	12	--	-	-	-	-
UNIGENE0002891	ID_1502	6	--	-	-	-	-
UNIGENE0002893	ID_1503	21	PREDICTED: transcription factor WER-like [Cucumis melo]	-	-	GO:0005488//binding;GO:1901363//heterocyclic compound binding;GO:0097159//organic cyclic compound binding;GO:0003676//nucleic acid binding	-
UNIGENE0002894	ID_1504	15	--	-	-	-	-
UNIGENE0002896	ID_1505	24	PREDICTED: myb-related protein 306 [Cucumis melo]	-	-	-	-
UNIGENE0002898	ID_1506	4	PREDICTED: glutamate--tRNA ligase, chloroplastic/mitochondrial [Cucumis sativus]	ko00970//Aminoacyl-tRNA biosynthesis//Translation//Genetic Information Processing;ko00860//Porphyrin and chlorophyll metabolism//Metabolism of cofactors and vitamins//Metabolism	GO:0044424//intracellular part;GO:0043226//organelle;GO:0044464//cell part;GO:0043231//intracellular membrane-bounded organelle;GO:0009536//plastid;GO:0044422//organelle part;GO:0044444//cytoplasmic part;GO:0005737//cytoplasm;GO:0044435//plastid part;GO:0005622//intracellular;GO:0043227//membrane-bounded organelle;GO:0009532//plastid stroma;GO:0044446//intracellular organelle part;GO:0005623//cel…	GO:0097367//carbohydrate derivative binding;GO:0016874//ligase activity;GO:1901363//heterocyclic compound binding;GO:0032550//purine ribonucleoside binding;GO:0001883//purine nucleoside binding;GO:0097159//organic cyclic compound binding;GO:0003824//catalytic activity;GO:0005488//binding;GO:0003676//nucleic acid binding;GO:0016876//ligase activity, forming aminoacyl-tRNA and related compounds;GO:…	GO:0044238//primary metabolic process;GO:0006807//nitrogen compound metabolic process;GO:0010467//gene expression;GO:0043038//amino acid activation;GO:1901564//organonitrogen compound metabolic process;GO:0044710//single-organism metabolic process;GO:0019538//protein metabolic process;GO:1901360//organic cyclic compound metabolic process;GO:0043039//tRNA aminoacylation;GO:0009058//biosynthetic pr…
UNIGENE0002901	ID_1507	23	PREDICTED: pentatricopeptide repeat-containing protein At1g05750, chloroplastic [Cucumis sativus]	-	-	-	-
UNIGENE0002902	ID_1508	12	--	-	-	-	-
UNIGENE0002906	ID_1509	6	PREDICTED: myosin-binding protein 1-like isoform X1 [Cucumis sativus]	-	-	-	-
UNIGENE0002907	ID_1510	7	PREDICTED: phragmoplast orienting kinesin-1 isoform X2 [Cucumis sativus]	-	GO:0032991//macromolecular complex;GO:0043228//non-membrane-bounded organelle;GO:0005737//cytoplasm;GO:0044424//intracellular part;GO:0005856//cytoskeleton;GO:0044422//organelle part;GO:0043229//intracellular organelle;GO:0043234//protein complex;GO:0044444//cytoplasmic part;GO:0005875//microtubule associated complex;GO:0044446//intracellular organelle part;GO:0015630//microtubule cytoskeleton;GO…	GO:0003824//catalytic activity;GO:1901363//heterocyclic compound binding;GO:0003774//motor activity;GO:0001883//purine nucleoside binding;GO:0008092//cytoskeletal protein binding;GO:0032549//ribonucleoside binding;GO:0097159//organic cyclic compound binding;GO:0005515//protein binding;GO:0015631//tubulin binding;GO:0097367//carbohydrate derivative binding;GO:0001882//nucleoside binding;GO:0032550…	GO:0000910//cytokinesis;GO:0016043//cellular component organization;GO:0019219//regulation of nucleobase-containing compound metabolic process;GO:0050789//regulation of biological process;GO:0044763//single-organism cellular process;GO:0080090//regulation of primary metabolic process;GO:0044699//single-organism process;GO:0019222//regulation of metabolic process;GO:0061640//cytoskeleton-dependent…
UNIGENE0002912	ID_1511	12	--	-	-	-	-
UNIGENE0002914	ID_1512	13	PREDICTED: glu S.griseus protease inhibitor-like [Cucumis sativus]	-	-	GO:0004866//endopeptidase inhibitor activity;GO:0030234//enzyme regulator activity;GO:0003824//catalytic activity;GO:0061134//peptidase regulator activity;GO:0098772//molecular function regulator;GO:0030414//peptidase inhibitor activity;GO:0004857//enzyme inhibitor activity;GO:0061135//endopeptidase regulator activity;GO:0016787//hydrolase activity	GO:0032268//regulation of cellular protein metabolic process;GO:0060255//regulation of macromolecule metabolic process;GO:0044092//negative regulation of molecular function;GO:0065009//regulation of molecular function;GO:0045861//negative regulation of proteolysis;GO:0030162//regulation of proteolysis;GO:0051248//negative regulation of protein metabolic process;GO:0048519//negative regulation of …
UNIGENE0002915	ID_1513	8	PREDICTED: glu S.griseus protease inhibitor-like [Cucumis melo]	-	-	GO:0016787//hydrolase activity;GO:0003824//catalytic activity;GO:0004866//endopeptidase inhibitor activity;GO:0061135//endopeptidase regulator activity;GO:0030234//enzyme regulator activity;GO:0030414//peptidase inhibitor activity;GO:0061134//peptidase regulator activity;GO:0098772//molecular function regulator;GO:0004857//enzyme inhibitor activity	GO:0051248//negative regulation of protein metabolic process;GO:0030162//regulation of proteolysis;GO:0050789//regulation of biological process;GO:0050794//regulation of cellular process;GO:0032269//negative regulation of cellular protein metabolic process;GO:0044092//negative regulation of molecular function;GO:0031323//regulation of cellular metabolic process;GO:0050896//response to stimulus;GO…
UNIGENE0002917	ID_1514	6	--	-	-	-	-
UNIGENE0002918	ID_1515	12	--	-	-	-	-
UNIGENE0002920	ID_1516	6	--	-	-	-	-
UNIGENE0002921	ID_1517	12	--	-	-	-	-
UNIGENE0002924	ID_1518	2	BnaC05g03600D [Brassica napus]	-	-	GO:0005488//binding	-
UNIGENE0002926	ID_1519	12	--	-	-	-	-
UNIGENE0002928	ID_1520	10	--	-	-	-	-
UNIGENE0002929	ID_1521	10	--	-	-	-	-
UNIGENE0002930	ID_1522	11	late embryogenesis abundant protein group 9 protein [Arachis hypogaea]	-	-	-	-
UNIGENE0002931	ID_1523	12	--	-	-	-	-
UNIGENE0002934	ID_1524	15	PREDICTED: ubiquitin-40S ribosomal protein S27a-like [Citrus sinensis]	ko03010//Ribosome//Translation//Genetic Information Processing	GO:0030529//ribonucleoprotein complex;GO:0044424//intracellular part;GO:0044464//cell part;GO:0005623//cell;GO:0005622//intracellular;GO:0032991//macromolecular complex	GO:0005198//structural molecule activity	GO:0043170//macromolecule metabolic process;GO:0071704//organic substance metabolic process;GO:0010467//gene expression;GO:0008152//metabolic process
UNIGENE0002936	ID_1525	12	--	-	-	-	-
UNIGENE0002937	ID_1526	23	--	-	-	-	-
UNIGENE0002938	ID_1527	12	--	-	-	-	-
UNIGENE0002939	ID_1528	6	--	-	-	-	-
UNIGENE0002940	ID_1529	17	--	-	-	-	-
UNIGENE0002942	ID_1530	12	BnaCnng07680D [Brassica napus]	-	-	GO:0016740//transferase activity;GO:0016747//transferase activity, transferring acyl groups other than amino-acyl groups;GO:0016746//transferase activity, transferring acyl groups;GO:0003824//catalytic activity;GO:0016407//acetyltransferase activity	-
UNIGENE0002943	ID_1531	11	--	-	-	-	-
UNIGENE0002944	ID_1532	7	--	-	-	-	-
UNIGENE0002945	ID_1533	12	--	-	-	-	-
UNIGENE0002946	ID_1534	10	--	-	-	-	-
UNIGENE0002947	ID_1535	15	PREDICTED: probable inactive purple acid phosphatase 29 [Cucumis melo]	-	-	GO:0003824//catalytic activity	-
UNIGENE0002948	ID_1536	19	PREDICTED: serine/threonine-protein kinase At5g01020 [Cucumis sativus]	-	-	GO:0016772//transferase activity, transferring phosphorus-containing groups;GO:0032550//purine ribonucleoside binding;GO:0016773//phosphotransferase activity, alcohol group as acceptor;GO:0004713//protein tyrosine kinase activity;GO:0004672//protein kinase activity;GO:1901363//heterocyclic compound binding;GO:0036094//small molecule binding;GO:0001883//purine nucleoside binding;GO:0005488//bindin…	GO:0006796//phosphate-containing compound metabolic process;GO:0044238//primary metabolic process;GO:0006793//phosphorus metabolic process;GO:0044267//cellular protein metabolic process;GO:0006464//cellular protein modification process;GO:0019538//protein metabolic process;GO:0016310//phosphorylation;GO:0043412//macromolecule modification;GO:0044237//cellular metabolic process;GO:0043170//macromo…
UNIGENE0002950	ID_1537	12	--	-	-	-	-
UNIGENE0002952	ID_1538	3	--	-	-	-	-
UNIGENE0002954	ID_1539	6	--	-	-	-	-
UNIGENE0002955	ID_1540	12	--	-	-	-	-
UNIGENE0002956	ID_1541	10	--	-	-	-	-
UNIGENE0002958	ID_1542	12	--	-	-	-	-
UNIGENE0002962	ID_1543	7	--	-	-	-	-
UNIGENE0002963	ID_1544	11	PREDICTED: GDSL esterase/lipase At1g54790-like isoform X2 [Cucumis melo]	-	-	GO:0016787//hydrolase activity;GO:0003824//catalytic activity	GO:0044237//cellular metabolic process;GO:0044085//cellular component biogenesis;GO:0010410//hemicellulose metabolic process;GO:0044710//single-organism metabolic process;GO:0044260//cellular macromolecule metabolic process;GO:0044036//cell wall macromolecule metabolic process;GO:0071554//cell wall organization or biogenesis;GO:0044699//single-organism process;GO:0005975//carbohydrate metabolic p…
UNIGENE0002964	ID_1545	12	hypothetical protein Csa_3G099610 [Cucumis sativus]	-	-	-	-
UNIGENE0002966	ID_1546	16	PREDICTED: transcription initiation factor TFIID subunit 1-like [Solanum tuberosum]	-	-	-	-
UNIGENE0002971	ID_1547	12	--	-	-	-	-
UNIGENE0002972	ID_1548	12	PREDICTED: uncharacterized protein LOC102622884 [Citrus sinensis]	-	-	-	-
UNIGENE0002976	ID_1549	9	PREDICTED: FK506-binding protein 4-like [Solanum tuberosum]	-	-	-	-
UNIGENE0002977	ID_1550	19	PREDICTED: BTB/POZ domain-containing protein At3g56230 [Cucumis sativus]	-	-	-	GO:0006464//cellular protein modification process;GO:0043170//macromolecule metabolic process;GO:0036211//protein modification process;GO:0071704//organic substance metabolic process;GO:0010383//cell wall polysaccharide metabolic process;GO:0005975//carbohydrate metabolic process;GO:0044260//cellular macromolecule metabolic process;GO:0045491//xylan metabolic process;GO:0008152//metabolic process…
UNIGENE0002980	ID_1551	12	--	-	-	-	-
UNIGENE0002982	ID_1552	5	--	-	-	-	-
UNIGENE0002985	ID_1553	5	--	-	-	-	-
UNIGENE0002988	ID_1554	2	PREDICTED: ABC transporter B family member 15-like [Cucumis sativus]	ko02010//ABC transporters//Membrane transport//Environmental Information Processing	GO:0031224//intrinsic component of membrane;GO:0044425//membrane part;GO:0016020//membrane	GO:0097159//organic cyclic compound binding;GO:0016817//hydrolase activity, acting on acid anhydrides;GO:0005215//transporter activity;GO:0015405//P-P-bond-hydrolysis-driven transmembrane transporter activity;GO:0003824//catalytic activity;GO:1901363//heterocyclic compound binding;GO:0017111//nucleoside-triphosphatase activity;GO:0097367//carbohydrate derivative binding;GO:0001883//purine nucleos…	GO:0051234//establishment of localization;GO:1902578//single-organism localization;GO:0015893//drug transport;GO:0050896//response to stimulus;GO:0044765//single-organism transport;GO:0044763//single-organism cellular process;GO:0009987//cellular process;GO:0051179//localization;GO:0042221//response to chemical;GO:0042493//response to drug;GO:0044699//single-organism process;GO:0006810//transport
UNIGENE0002992	ID_1555	9	--	-	-	-	-
UNIGENE0002993	ID_1556	12	--	-	-	-	-
UNIGENE0002998	ID_1557	2	--	-	-	-	-
UNIGENE0002999	ID_1558	14	--	-	-	-	-
UNIGENE0003007	ID_1559	12	--	-	-	-	-
UNIGENE0003008	ID_1560	6	Cysteine-rich RLK (RECEPTOR-like protein kinase) 8 [Theobroma cacao]	-	-	GO:0043167//ion binding;GO:0005488//binding;GO:0097159//organic cyclic compound binding;GO:0016772//transferase activity, transferring phosphorus-containing groups;GO:0046914//transition metal ion binding;GO:0016740//transferase activity;GO:0003824//catalytic activity;GO:0046872//metal ion binding;GO:0043169//cation binding	GO:0034641//cellular nitrogen compound metabolic process;GO:0044238//primary metabolic process;GO:0009987//cellular process;GO:0071704//organic substance metabolic process;GO:0043170//macromolecule metabolic process;GO:0046483//heterocycle metabolic process;GO:0006793//phosphorus metabolic process;GO:0008152//metabolic process;GO:0006259//DNA metabolic process;GO:0044260//cellular macromolecule m…
UNIGENE0003009	ID_1561	19	--	-	-	-	-
UNIGENE0003010	ID_1562	7	PREDICTED: protein LIGHT-DEPENDENT SHORT HYPOCOTYLS 10-like [Cucumis melo]	-	-	-	-
UNIGENE0003017	ID_1563	12	--	-	-	-	-
UNIGENE0003018	ID_1564	12	--	-	-	-	-
UNIGENE0003020	ID_1565	21	PREDICTED: probable sulfate transporter 3.5 [Cucumis melo]	-	GO:0044425//membrane part;GO:0031224//intrinsic component of membrane;GO:0016020//membrane	GO:0015291//secondary active transmembrane transporter activity;GO:0022892//substrate-specific transporter activity;GO:0022857//transmembrane transporter activity;GO:0008509//anion transmembrane transporter activity;GO:0022804//active transmembrane transporter activity;GO:0005215//transporter activity;GO:0015103//inorganic anion transmembrane transporter activity;GO:0015075//ion transmembrane tra…	GO:0006820//anion transport;GO:0051179//localization;GO:0044699//single-organism process;GO:0006810//transport;GO:0044763//single-organism cellular process;GO:0009987//cellular process;GO:0015698//inorganic anion transport;GO:0051234//establishment of localization;GO:0006811//ion transport;GO:1902578//single-organism localization;GO:0044765//single-organism transport;GO:0072348//sulfur compound t…
UNIGENE0003021	ID_1566	12	--	-	-	-	-
UNIGENE0003023	ID_1567	12	--	-	-	-	-
UNIGENE0003024	ID_1568	16	PREDICTED: pentatricopeptide repeat-containing protein DOT4, chloroplastic-like [Cucumis sativus]	-	-	-	-
UNIGENE0003026	ID_1569	17	--	-	-	-	-
UNIGENE0003027	ID_1570	12	--	-	-	-	-
UNIGENE0003032	ID_1571	21	--	-	-	-	-
UNIGENE0003035	ID_1572	23	PREDICTED: histone-lysine N-methyltransferase SETD1A [Cucumis melo]	-	-	-	-
UNIGENE0003039	ID_1573	7	PLATZ transcription factor family protein [Theobroma cacao]	-	GO:0005623//cell;GO:0044464//cell part	GO:0005488//binding;GO:0043169//cation binding;GO:0046872//metal ion binding;GO:0046914//transition metal ion binding;GO:0043167//ion binding	-
UNIGENE0003042	ID_1574	21	PREDICTED: protein ENL-like [Cucumis melo]	-	-	-	-
UNIGENE0003047	ID_1575	19	H0801D08.15 [Oryza sativa Indica Group]	-	-	-	-
UNIGENE0003049	ID_1576	6	BnaC08g13650D, partial [Brassica napus]	-	GO:0043229//intracellular organelle;GO:0005623//cell;GO:0043226//organelle;GO:0043231//intracellular membrane-bounded organelle;GO:0005622//intracellular;GO:0044464//cell part;GO:0043227//membrane-bounded organelle;GO:0044424//intracellular part	GO:0043167//ion binding;GO:0008233//peptidase activity;GO:0097159//organic cyclic compound binding;GO:0003824//catalytic activity;GO:0016787//hydrolase activity;GO:0005488//binding;GO:0070011//peptidase activity, acting on L-amino acid peptides;GO:0043169//cation binding;GO:0004175//endopeptidase activity;GO:0046914//transition metal ion binding;GO:0046872//metal ion binding	GO:0009987//cellular process;GO:0008152//metabolic process;GO:0019538//protein metabolic process;GO:0034641//cellular nitrogen compound metabolic process;GO:0044237//cellular metabolic process;GO:0044260//cellular macromolecule metabolic process;GO:0043170//macromolecule metabolic process;GO:0006139//nucleobase-containing compound metabolic process;GO:0046483//heterocycle metabolic process;GO:000…
UNIGENE0003053	ID_1577	24	ribosomal family protein [Populus trichocarpa]	-	GO:0005737//cytoplasm;GO:0030529//ribonucleoprotein complex;GO:0044422//organelle part;GO:0044435//plastid part;GO:0009507//chloroplast;GO:0009526//plastid envelope;GO:0009536//plastid;GO:0044464//cell part;GO:0043226//organelle;GO:0031975//envelope;GO:0005622//intracellular;GO:0044424//intracellular part;GO:0044446//intracellular organelle part;GO:0031967//organelle envelope;GO:0005623//cell;GO:…	-	-
UNIGENE0003054	ID_1578	7	PREDICTED: dCTP pyrophosphatase 1-like [Jatropha curcas]	-	-	-	-
UNIGENE0003056	ID_1579	12	hypothetical protein PRUPE_ppa015607mg, partial [Prunus persica]	-	-	-	-
UNIGENE0003057	ID_1580	24	PREDICTED: inhibitor of trypsin and hageman factor-like [Cucumis sativus]	-	-	GO:0030414//peptidase inhibitor activity;GO:0004857//enzyme inhibitor activity;GO:0030234//enzyme regulator activity;GO:0061134//peptidase regulator activity;GO:0098772//molecular function regulator;GO:0061135//endopeptidase regulator activity;GO:0004866//endopeptidase inhibitor activity	GO:0019222//regulation of metabolic process;GO:0048519//negative regulation of biological process;GO:0032269//negative regulation of cellular protein metabolic process;GO:0060255//regulation of macromolecule metabolic process;GO:0065007//biological regulation;GO:0031324//negative regulation of cellular metabolic process;GO:0051346//negative regulation of hydrolase activity;GO:0044092//negative re…
UNIGENE0003058	ID_1581	15	PREDICTED: inhibitor of trypsin and hageman factor-like [Cucumis sativus]	-	-	GO:0030234//enzyme regulator activity;GO:0030414//peptidase inhibitor activity;GO:0004857//enzyme inhibitor activity;GO:0004866//endopeptidase inhibitor activity;GO:0061135//endopeptidase regulator activity;GO:0098772//molecular function regulator;GO:0061134//peptidase regulator activity	GO:0051246//regulation of protein metabolic process;GO:0031324//negative regulation of cellular metabolic process;GO:0048523//negative regulation of cellular process;GO:0031323//regulation of cellular metabolic process;GO:0080090//regulation of primary metabolic process;GO:0019222//regulation of metabolic process;GO:0050896//response to stimulus;GO:0006950//response to stress;GO:0044092//negative…
UNIGENE0003060	ID_1582	7	--	-	-	-	-
UNIGENE0003061	ID_1583	20	PREDICTED: caffeoylshikimate esterase-like [Cucumis melo]	-	-	-	-
UNIGENE0003062	ID_1584	10	--	-	-	-	-
UNIGENE0003063	ID_1585	17	--	-	-	-	-
UNIGENE0003064	ID_1586	9	--	-	-	-	-
UNIGENE0003066	ID_1587	12	--	-	-	-	-
UNIGENE0003067	ID_1588	12	PREDICTED: aluminum-activated malate transporter 12-like [Cucumis melo]	-	-	-	GO:0051234//establishment of localization;GO:0006835//dicarboxylic acid transport;GO:0071702//organic substance transport;GO:0015849//organic acid transport;GO:0051179//localization;GO:0006810//transport;GO:0015740//C4-dicarboxylate transport;GO:0046942//carboxylic acid transport;GO:1902578//single-organism localization;GO:0006820//anion transport;GO:0044765//single-organism transport;GO:0015711/…
UNIGENE0003068	ID_1589	18	--	-	-	-	-
UNIGENE0003073	ID_1590	15	hypothetical protein Csa_4G326540 [Cucumis sativus]	-	-	-	-
UNIGENE0003077	ID_1591	9	--	-	-	-	-
UNIGENE0003080	ID_1592	11	--	-	-	-	-
UNIGENE0003081	ID_1593	0	PREDICTED: probable WRKY transcription factor 70 [Cucumis melo]	-	-	GO:0003677//DNA binding;GO:0005488//binding;GO:0001071//nucleic acid binding transcription factor activity;GO:0097159//organic cyclic compound binding;GO:0003676//nucleic acid binding;GO:1901363//heterocyclic compound binding	GO:0010468//regulation of gene expression;GO:0060255//regulation of macromolecule metabolic process;GO:0050789//regulation of biological process;GO:0065007//biological regulation;GO:0019222//regulation of metabolic process
UNIGENE0003082	ID_1594	9	PREDICTED: probable WRKY transcription factor 70 [Cucumis melo]	-	-	GO:0003676//nucleic acid binding;GO:0003677//DNA binding;GO:0097159//organic cyclic compound binding;GO:1901363//heterocyclic compound binding;GO:0005488//binding	-
UNIGENE0003083	ID_1595	6	--	-	-	-	-
UNIGENE0003085	ID_1596	22	PREDICTED: protein trichome birefringence-like 41 [Cucumis melo]	-	-	-	-
UNIGENE0003087	ID_1597	12	PREDICTED: protein IQ-DOMAIN 1-like [Cucumis sativus]	-	-	-	-
UNIGENE0003097	ID_1598	5	PREDICTED: exocyst complex component SEC15A-like [Cucumis melo]	-	GO:0032991//macromolecular complex;GO:0043234//protein complex	-	GO:0016192//vesicle-mediated transport;GO:0048278//vesicle docking;GO:0009987//cellular process;GO:0051234//establishment of localization;GO:0008104//protein localization;GO:0006810//transport;GO:0022406//membrane docking;GO:0033036//macromolecule localization;GO:0044699//single-organism process;GO:0044763//single-organism cellular process;GO:0051179//localization
UNIGENE0003098	ID_1599	11	PREDICTED: retrovirus-related Pol polyprotein from transposon TNT 1-94 isoform X3 [Cucumis melo]	-	-	-	-
UNIGENE0003099	ID_1600	5	MADS-box transcription factor ANR1 [Glycine soja]	-	GO:0043227//membrane-bounded organelle;GO:0005622//intracellular;GO:0044464//cell part;GO:0043231//intracellular membrane-bounded organelle;GO:0044424//intracellular part;GO:0043226//organelle;GO:0005623//cell;GO:0043229//intracellular organelle	GO:0016740//transferase activity;GO:0097159//organic cyclic compound binding;GO:0003824//catalytic activity;GO:0005488//binding;GO:0043167//ion binding	GO:0006259//DNA metabolic process;GO:0034645//cellular macromolecule biosynthetic process;GO:0050794//regulation of cellular process;GO:0034654//nucleobase-containing compound biosynthetic process;GO:0009059//macromolecule biosynthetic process;GO:0090304//nucleic acid metabolic process;GO:0097659//nucleic acid-templated transcription;GO:0008152//metabolic process;GO:0019438//aromatic compound bio…
UNIGENE0003100	ID_1601	12	--	-	-	-	-
UNIGENE0003101	ID_1602	16	hypothetical protein Csa_6G318690 [Cucumis sativus]	-	-	-	-
UNIGENE0003107	ID_1603	6	--	-	-	-	-
UNIGENE0003108	ID_1604	12	--	-	-	-	-
UNIGENE0003110	ID_1605	10	Alpha/beta-Hydrolases superfamily protein [Theobroma cacao]	-	-	GO:0003824//catalytic activity	-
UNIGENE0003111	ID_1606	7	--	-	-	-	-
UNIGENE0003113	ID_1607	12	--	-	-	-	-
UNIGENE0003115	ID_1608	0	PREDICTED: lichenase-2-like [Cucumis sativus]	-	-	GO:0016787//hydrolase activity;GO:0003824//catalytic activity	-
UNIGENE0003118	ID_1609	14	PREDICTED: protein MIZU-KUSSEI 1 [Cucumis sativus]	-	-	-	-
UNIGENE0003121	ID_1610	6	--	-	-	-	-
UNIGENE0003122	ID_1611	6	--	-	-	-	-
UNIGENE0003123	ID_1612	20	Plastid movement impaired 2 [Theobroma cacao]	-	-	-	-
UNIGENE0003124	ID_1613	20	Plastid movement impaired 2 [Theobroma cacao]	-	-	-	-
UNIGENE0003125	ID_1614	6	--	-	-	-	-
UNIGENE0003127	ID_1615	12	--	-	-	-	-
UNIGENE0003128	ID_1616	7	--	-	-	-	-
UNIGENE0003129	ID_1617	6	--	-	-	-	-
UNIGENE0003130	ID_1618	12	--	-	-	-	-
UNIGENE0003131	ID_1619	12	--	-	-	-	-
UNIGENE0003132	ID_1620	3	--	-	-	-	-
UNIGENE0003137	ID_1621	5	hypothetical protein CICLE_v10007098mg, partial [Citrus clementina]	-	-	-	-
UNIGENE0003138	ID_1622	12	PREDICTED: 3-hydroxy-3-methylglutaryl-coenzyme A reductase 1-like [Cucumis melo]	ko00900//Terpenoid backbone biosynthesis//Metabolism of terpenoids and polyketides//Metabolism	GO:0043226//organelle;GO:0016020//membrane;GO:0005623//cell;GO:0044424//intracellular part;GO:0043229//intracellular organelle;GO:0043231//intracellular membrane-bounded organelle;GO:0031090//organelle membrane;GO:0044422//organelle part;GO:0043227//membrane-bounded organelle;GO:0044464//cell part;GO:0031224//intrinsic component of membrane;GO:0044425//membrane part;GO:0005622//intracellular	GO:0016491//oxidoreductase activity;GO:1901265//nucleoside phosphate binding;GO:0000166//nucleotide binding;GO:1901363//heterocyclic compound binding;GO:0016614//oxidoreductase activity, acting on CH-OH group of donors;GO:0005488//binding;GO:0003824//catalytic activity;GO:0036094//small molecule binding;GO:0016616//oxidoreductase activity, acting on the CH-OH group of donors, NAD or NADP as accep…	GO:0071704//organic substance metabolic process;GO:0044255//cellular lipid metabolic process;GO:0008202//steroid metabolic process;GO:0009987//cellular process;GO:0006722//triterpenoid metabolic process;GO:0008152//metabolic process;GO:0009058//biosynthetic process;GO:0008610//lipid biosynthetic process;GO:0044763//single-organism cellular process;GO:1901362//organic cyclic compound biosynthetic …
UNIGENE0003139	ID_1623	20	3-hydroxy-3-methylglutaryl CoA reductase 2, partial [Solanum cheesmaniae]	ko00900//Terpenoid backbone biosynthesis//Metabolism of terpenoids and polyketides//Metabolism	GO:0043226//organelle;GO:0043231//intracellular membrane-bounded organelle;GO:0043227//membrane-bounded organelle;GO:0044422//organelle part;GO:0031224//intrinsic component of membrane;GO:0005623//cell;GO:0043229//intracellular organelle;GO:0031090//organelle membrane;GO:0044425//membrane part;GO:0044424//intracellular part;GO:0005622//intracellular;GO:0016020//membrane;GO:0044464//cell part	GO:0048037//cofactor binding;GO:0005488//binding;GO:0016614//oxidoreductase activity, acting on CH-OH group of donors;GO:0036094//small molecule binding;GO:0097159//organic cyclic compound binding;GO:0016616//oxidoreductase activity, acting on the CH-OH group of donors, NAD or NADP as acceptor;GO:0016491//oxidoreductase activity;GO:0003824//catalytic activity;GO:1901265//nucleoside phosphate bind…	GO:0044255//cellular lipid metabolic process;GO:0006732//coenzyme metabolic process;GO:0044710//single-organism metabolic process;GO:0009987//cellular process;GO:0006722//triterpenoid metabolic process;GO:0006694//steroid biosynthetic process;GO:1901362//organic cyclic compound biosynthetic process;GO:1901360//organic cyclic compound metabolic process;GO:0008202//steroid metabolic process;GO:1901…
UNIGENE0003140	ID_1624	20	PREDICTED: 3-hydroxy-3-methylglutaryl-coenzyme A reductase 1-like [Cucumis melo]	ko00900//Terpenoid backbone biosynthesis//Metabolism of terpenoids and polyketides//Metabolism	GO:0031090//organelle membrane;GO:0043226//organelle;GO:0044464//cell part;GO:0043231//intracellular membrane-bounded organelle;GO:0016020//membrane;GO:0044422//organelle part;GO:0043229//intracellular organelle;GO:0044425//membrane part;GO:0044424//intracellular part;GO:0043227//membrane-bounded organelle;GO:0005622//intracellular;GO:0005623//cell;GO:0031224//intrinsic component of membrane	GO:0097159//organic cyclic compound binding;GO:1901265//nucleoside phosphate binding;GO:1901363//heterocyclic compound binding;GO:0048037//cofactor binding;GO:0003824//catalytic activity;GO:0016614//oxidoreductase activity, acting on CH-OH group of donors;GO:0000166//nucleotide binding;GO:0005488//binding;GO:0016616//oxidoreductase activity, acting on the CH-OH group of donors, NAD or NADP as acc…	GO:0009058//biosynthetic process;GO:0044699//single-organism process;GO:0006629//lipid metabolic process;GO:0006722//triterpenoid metabolic process;GO:0006720//isoprenoid metabolic process;GO:1901576//organic substance biosynthetic process;GO:1901362//organic cyclic compound biosynthetic process;GO:0008152//metabolic process;GO:0006694//steroid biosynthetic process;GO:0071704//organic substance m…
UNIGENE0003143	ID_1625	3	--	-	-	-	-
UNIGENE0003144	ID_1626	4	PREDICTED: cell wall / vacuolar inhibitor of fructosidase 2 [Cucumis melo]	-	-	GO:0052689//carboxylic ester hydrolase activity;GO:0098772//molecular function regulator;GO:0003824//catalytic activity;GO:0016788//hydrolase activity, acting on ester bonds;GO:0030234//enzyme regulator activity;GO:0016787//hydrolase activity	GO:0048519//negative regulation of biological process;GO:0019222//regulation of metabolic process;GO:0050789//regulation of biological process;GO:0065007//biological regulation;GO:0009892//negative regulation of metabolic process
UNIGENE0003146	ID_1627	10	--	-	-	-	-
UNIGENE0003148	ID_1628	1	--	-	-	-	-
UNIGENE0003149	ID_1629	12	--	-	-	-	-
UNIGENE0003150	ID_1630	3	--	-	-	-	-
UNIGENE0003151	ID_1631	7	--	-	-	-	-
UNIGENE0003152	ID_1632	9	PREDICTED: probable serine/threonine protein kinase IRE [Cucumis sativus]	-	-	GO:0016772//transferase activity, transferring phosphorus-containing groups;GO:0032549//ribonucleoside binding;GO:0001882//nucleoside binding;GO:0032550//purine ribonucleoside binding;GO:0016301//kinase activity;GO:0001883//purine nucleoside binding;GO:0016773//phosphotransferase activity, alcohol group as acceptor;GO:0036094//small molecule binding;GO:0005488//binding;GO:0003824//catalytic activ…	GO:0044763//single-organism cellular process;GO:0019538//protein metabolic process;GO:0006793//phosphorus metabolic process;GO:0048468//cell development;GO:0071704//organic substance metabolic process;GO:0044260//cellular macromolecule metabolic process;GO:0008152//metabolic process;GO:0006796//phosphate-containing compound metabolic process;GO:0009664//plant-type cell wall organization;GO:003298…
UNIGENE0003153	ID_1633	25	PREDICTED: epidermal growth factor receptor substrate 15 homolog [Nicotiana tomentosiformis]	-	-	-	-
UNIGENE0003157	ID_1634	12	--	-	-	-	-
UNIGENE0003158	ID_1635	12	--	-	-	-	-
UNIGENE0003161	ID_1636	21	PREDICTED: cytochrome P450 CYP82D47-like [Cucumis sativus]	-	-	GO:0046914//transition metal ion binding;GO:0043167//ion binding;GO:0097159//organic cyclic compound binding;GO:0003824//catalytic activity;GO:1901363//heterocyclic compound binding;GO:0046872//metal ion binding;GO:0043169//cation binding;GO:0005488//binding;GO:0046906//tetrapyrrole binding;GO:0016491//oxidoreductase activity	GO:0044710//single-organism metabolic process;GO:0008152//metabolic process;GO:0044699//single-organism process
UNIGENE0003164	ID_1637	6	--	-	-	-	-
UNIGENE0003165	ID_1638	9	--	-	-	-	-
UNIGENE0003171	ID_1639	12	--	-	-	-	-
UNIGENE0003172	ID_1640	21	PREDICTED: CASP-like protein VIT_07s0104g01350 [Cucumis melo]	-	GO:0016020//membrane	-	-
UNIGENE0003174	ID_1641	6	PREDICTED: conserved oligomeric Golgi complex subunit 8 [Cucumis sativus]	-	GO:0043234//protein complex;GO:0005911//cell-cell junction;GO:0030054//cell junction;GO:0032991//macromolecular complex	-	-
UNIGENE0003175	ID_1642	13	PREDICTED: conserved oligomeric Golgi complex subunit 8 [Cucumis sativus]	-	GO:0030054//cell junction;GO:0005911//cell-cell junction;GO:0032991//macromolecular complex;GO:0043234//protein complex	-	-
UNIGENE0003176	ID_1643	9	PREDICTED: histone-lysine N-methyltransferase ATX3-like isoform X1 [Pyrus x bretschneideri]	-	-	GO:0043167//ion binding;GO:0043169//cation binding;GO:0046914//transition metal ion binding;GO:0016491//oxidoreductase activity;GO:0016651//oxidoreductase activity, acting on NAD(P)H;GO:0003824//catalytic activity;GO:0016668//oxidoreductase activity, acting on a sulfur group of donors, NAD(P) as acceptor;GO:0016667//oxidoreductase activity, acting on a sulfur group of donors;GO:0005488//binding;G…	GO:0044710//single-organism metabolic process;GO:0044699//single-organism process;GO:0008152//metabolic process
UNIGENE0003177	ID_1644	21	Gb:AAF02129.1 isoform 1 [Theobroma cacao]	-	-	-	-
UNIGENE0003178	ID_1645	21	--	-	-	-	-
UNIGENE0003179	ID_1646	20	--	-	-	-	-
UNIGENE0003180	ID_1647	6	--	-	-	-	-
UNIGENE0003182	ID_1648	3	--	-	-	-	-
UNIGENE0003184	ID_1649	6	--	-	-	-	-
UNIGENE0003185	ID_1650	7	--	-	-	-	-
UNIGENE0003187	ID_1651	12	--	-	-	-	-
UNIGENE0003191	ID_1652	21	PREDICTED: plastid division protein PDV2 [Cucumis melo]	-	GO:0030054//cell junction;GO:0044422//organelle part;GO:0016020//membrane;GO:0043226//organelle;GO:0043227//membrane-bounded organelle;GO:0044428//nuclear part;GO:0005622//intracellular;GO:0044464//cell part;GO:0044446//intracellular organelle part;GO:0043231//intracellular membrane-bounded organelle;GO:0005634//nucleus;GO:0005911//cell-cell junction;GO:0005737//cytoplasm;GO:0071944//cell periphe…	GO:0097159//organic cyclic compound binding;GO:0046914//transition metal ion binding;GO:0046906//tetrapyrrole binding;GO:0005488//binding;GO:1901363//heterocyclic compound binding;GO:0043167//ion binding;GO:0043169//cation binding;GO:0046872//metal ion binding	GO:0007165//signal transduction;GO:0023052//signaling;GO:0042743//hydrogen peroxide metabolic process;GO:0009751//response to salicylic acid;GO:0051179//localization;GO:0044765//single-organism transport;GO:0065007//biological regulation;GO:1902578//single-organism localization;GO:0050789//regulation of biological process;GO:0042221//response to chemical;GO:0009863//salicylic acid mediated signal…
UNIGENE0003192	ID_1653	11	cytochrome c oxidase subunit 3 [Citrullus lanatus]	ko00190//Oxidative phosphorylation//Energy metabolism//Metabolism	GO:0031224//intrinsic component of membrane;GO:0043227//membrane-bounded organelle;GO:0044424//intracellular part;GO:0016020//membrane;GO:0044425//membrane part;GO:0043226//organelle;GO:0019866//organelle inner membrane;GO:0043229//intracellular organelle;GO:0043231//intracellular membrane-bounded organelle;GO:0005622//intracellular;GO:0031975//envelope;GO:0031090//organelle membrane;GO:0044446//…	GO:0003824//catalytic activity;GO:0009055//electron carrier activity;GO:0016491//oxidoreductase activity	GO:0022904//respiratory electron transport chain;GO:0044699//single-organism process;GO:0015992//proton transport;GO:1902578//single-organism localization;GO:0006812//cation transport;GO:0008152//metabolic process;GO:0022900//electron transport chain;GO:0009987//cellular process;GO:0044237//cellular metabolic process;GO:0006091//generation of precursor metabolites and energy;GO:0044763//single-or…
UNIGENE0003194	ID_1654	15	PREDICTED: sentrin-specific protease 1-like [Vitis vinifera]	-	-	-	-
UNIGENE0003195	ID_1655	21	--	-	-	-	-
UNIGENE0003196	ID_1656	3	--	-	-	-	-
UNIGENE0003197	ID_1657	10	PREDICTED: ammonium transporter 2 [Cucumis sativus]	-	GO:0016020//membrane;GO:0044425//membrane part;GO:0031224//intrinsic component of membrane;GO:0005911//cell-cell junction;GO:0030054//cell junction	GO:0005215//transporter activity;GO:0022890//inorganic cation transmembrane transporter activity;GO:0022804//active transmembrane transporter activity;GO:0015291//secondary active transmembrane transporter activity;GO:0008324//cation transmembrane transporter activity;GO:0022857//transmembrane transporter activity;GO:0022892//substrate-specific transporter activity;GO:0022891//substrate-specific …	GO:0015672//monovalent inorganic cation transport;GO:0051049//regulation of transport;GO:0006812//cation transport;GO:0015696//ammonium transport;GO:0071310//cellular response to organic substance;GO:0009267//cellular response to starvation;GO:0070887//cellular response to chemical stimulus;GO:0071407//cellular response to organic cyclic compound;GO:0050896//response to stimulus;GO:1901700//respo…
UNIGENE0003198	ID_1658	12	PREDICTED: ammonium transporter 2 [Cucumis melo]	-	GO:0030054//cell junction;GO:0005622//intracellular;GO:0016020//membrane;GO:0005911//cell-cell junction;GO:0031224//intrinsic component of membrane;GO:0044464//cell part;GO:0044424//intracellular part;GO:0044425//membrane part;GO:0005623//cell	GO:0022857//transmembrane transporter activity;GO:0022891//substrate-specific transmembrane transporter activity;GO:0022804//active transmembrane transporter activity;GO:0015077//monovalent inorganic cation transmembrane transporter activity;GO:0015291//secondary active transmembrane transporter activity;GO:0005215//transporter activity;GO:0008324//cation transmembrane transporter activity;GO:002…	GO:0015696//ammonium transport;GO:0051179//localization;GO:0051707//response to other organism;GO:0071310//cellular response to organic substance;GO:0071840//cellular component organization or biogenesis;GO:0016043//cellular component organization;GO:1901360//organic cyclic compound metabolic process;GO:0018958//phenol-containing compound metabolic process;GO:0034285//response to disaccharide;GO:…
UNIGENE0003199	ID_1659	20	--	-	-	-	-
UNIGENE0003201	ID_1660	2	PREDICTED: quinone-oxidoreductase homolog, chloroplastic-like [Cucumis sativus]	-	-	GO:0046914//transition metal ion binding;GO:0005488//binding;GO:0043167//ion binding;GO:0043169//cation binding;GO:0046872//metal ion binding;GO:0003824//catalytic activity	GO:0044699//single-organism process;GO:0008152//metabolic process;GO:0044710//single-organism metabolic process
UNIGENE0003203	ID_1661	10	--	-	-	-	-
UNIGENE0003205	ID_1662	11	Glycogenin-2 [Gossypium arboreum]	-	-	GO:0003824//catalytic activity;GO:0016740//transferase activity	-
UNIGENE0003206	ID_1663	21	Glycogenin-2 [Gossypium arboreum]	-	-	GO:0016740//transferase activity;GO:0003824//catalytic activity	-
UNIGENE0003208	ID_1664	2	PREDICTED: ankyrin repeat and SAM domain-containing protein 6 [Cucumis melo]	-	-	-	-
UNIGENE0003213	ID_1665	12	--	-	-	-	-
UNIGENE0003214	ID_1666	21	PREDICTED: flotillin-like protein 4 [Cucumis sativus]	-	GO:0044464//cell part;GO:0005886//plasma membrane;GO:0044425//membrane part;GO:0016020//membrane;GO:0005623//cell;GO:0044459//plasma membrane part;GO:0071944//cell periphery	-	GO:0044419//interspecies interaction between organisms;GO:0051704//multi-organism process;GO:0044403//symbiosis, encompassing mutualism through parasitism
UNIGENE0003215	ID_1667	3	--	-	-	-	-
UNIGENE0003216	ID_1668	10	--	-	-	-	-
UNIGENE0003217	ID_1669	0	--	-	-	-	-
UNIGENE0003221	ID_1670	9	--	-	-	-	-
UNIGENE0003224	ID_1671	7	--	-	-	-	-
UNIGENE0003226	ID_1672	12	--	-	-	-	-
UNIGENE0003227	ID_1673	4	PREDICTED: leucine zipper protein 1-like [Cucumis melo]	-	-	-	-
UNIGENE0003228	ID_1674	5	PREDICTED: leucine zipper protein 1-like [Cucumis melo]	-	-	-	-
UNIGENE0003229	ID_1675	11	--	-	-	-	-
UNIGENE0003231	ID_1676	12	--	-	-	-	-
UNIGENE0003233	ID_1677	2	PREDICTED: oleoyl-acyl carrier protein thioesterase 1, chloroplastic [Cucumis melo]	ko00061//Fatty acid biosynthesis//Lipid metabolism//Metabolism	-	GO:0016746//transferase activity, transferring acyl groups;GO:0016740//transferase activity;GO:0016787//hydrolase activity;GO:0016790//thiolester hydrolase activity;GO:0003824//catalytic activity;GO:0016788//hydrolase activity, acting on ester bonds;GO:0016297//acyl-[acyl-carrier-protein] hydrolase activity;GO:0016747//transferase activity, transferring acyl groups other than amino-acyl groups;GO…	GO:0006629//lipid metabolic process;GO:0071704//organic substance metabolic process;GO:0032787//monocarboxylic acid metabolic process;GO:0044281//small molecule metabolic process;GO:0044255//cellular lipid metabolic process;GO:0044237//cellular metabolic process;GO:0044710//single-organism metabolic process;GO:0008152//metabolic process;GO:0044699//single-organism process;GO:0044763//single-organ…
UNIGENE0003234	ID_1678	1	--	-	-	-	-
UNIGENE0003236	ID_1679	9	PREDICTED: chlorophyllase-2, chloroplastic [Cucumis melo]	ko00860//Porphyrin and chlorophyll metabolism//Metabolism of cofactors and vitamins//Metabolism	GO:0043226//organelle;GO:0043227//membrane-bounded organelle	GO:0052689//carboxylic ester hydrolase activity;GO:0016787//hydrolase activity;GO:0016788//hydrolase activity, acting on ester bonds;GO:0003824//catalytic activity	GO:0051186//cofactor metabolic process;GO:0033013//tetrapyrrole metabolic process;GO:0019439//aromatic compound catabolic process;GO:0051187//cofactor catabolic process;GO:1901361//organic cyclic compound catabolic process;GO:1901360//organic cyclic compound metabolic process;GO:0044270//cellular nitrogen compound catabolic process;GO:0008152//metabolic process;GO:1901575//organic substance catab…
UNIGENE0003237	ID_1680	12	--	-	-	-	-
UNIGENE0003238	ID_1681	20	PREDICTED: pentatricopeptide repeat-containing protein At4g21065-like [Prunus mume]	-	-	GO:0016817//hydrolase activity, acting on acid anhydrides;GO:0003824//catalytic activity;GO:0042623//ATPase activity, coupled;GO:0016818//hydrolase activity, acting on acid anhydrides, in phosphorus-containing anhydrides;GO:0017111//nucleoside-triphosphatase activity;GO:0016462//pyrophosphatase activity;GO:0016887//ATPase activity;GO:0016787//hydrolase activity	-
UNIGENE0003241	ID_1682	21	PREDICTED: axial regulator YABBY 4-like [Cucumis sativus]	-	-	GO:0005488//binding	GO:0044699//single-organism process;GO:0032502//developmental process;GO:0044707//single-multicellular organism process;GO:0009987//cellular process;GO:0044767//single-organism developmental process;GO:0032501//multicellular organismal process;GO:0007275//multicellular organismal development
UNIGENE0003242	ID_1683	6	bZIP-like protein [Oryza sativa Japonica Group]	-	-	GO:1901363//heterocyclic compound binding;GO:0016740//transferase activity;GO:0003676//nucleic acid binding;GO:0003824//catalytic activity;GO:0005488//binding;GO:0034061//DNA polymerase activity;GO:0016779//nucleotidyltransferase activity;GO:0016772//transferase activity, transferring phosphorus-containing groups;GO:0097159//organic cyclic compound binding	GO:1901576//organic substance biosynthetic process;GO:0009987//cellular process;GO:0044238//primary metabolic process;GO:0009059//macromolecule biosynthetic process;GO:0006725//cellular aromatic compound metabolic process;GO:0006139//nucleobase-containing compound metabolic process;GO:0043170//macromolecule metabolic process;GO:1901360//organic cyclic compound metabolic process;GO:0046483//hetero…
UNIGENE0003243	ID_1684	16	--	-	-	-	-
UNIGENE0003245	ID_1685	20	PREDICTED: serine/threonine-protein kinase pakF-like [Jatropha curcas]	-	-	-	-
UNIGENE0003250	ID_1686	12	gag-pol polyprotein [Vitis vinifera]	-	-	GO:0097159//organic cyclic compound binding;GO:0046914//transition metal ion binding;GO:0046872//metal ion binding;GO:0043167//ion binding;GO:0005488//binding;GO:0043169//cation binding	GO:1901360//organic cyclic compound metabolic process;GO:0006725//cellular aromatic compound metabolic process;GO:0034641//cellular nitrogen compound metabolic process;GO:0090304//nucleic acid metabolic process;GO:0071704//organic substance metabolic process;GO:0044260//cellular macromolecule metabolic process;GO:0006139//nucleobase-containing compound metabolic process;GO:0043170//macromolecule …
UNIGENE0003252	ID_1687	9	--	-	-	-	-
UNIGENE0003253	ID_1688	6	--	-	-	-	-
UNIGENE0003254	ID_1689	21	PREDICTED: GDSL esterase/lipase At3g48460 [Cucumis sativus]	-	-	GO:0016491//oxidoreductase activity;GO:0016627//oxidoreductase activity, acting on the CH-CH group of donors;GO:0016787//hydrolase activity;GO:0003824//catalytic activity;GO:0016635//oxidoreductase activity, acting on the CH-CH group of donors, quinone or related compound as acceptor	GO:0006720//isoprenoid metabolic process;GO:0044699//single-organism process;GO:0071704//organic substance metabolic process;GO:0008152//metabolic process;GO:0044763//single-organism cellular process;GO:0044237//cellular metabolic process;GO:0044255//cellular lipid metabolic process;GO:0044710//single-organism metabolic process;GO:0042214//terpene metabolic process;GO:0016119//carotene metabolic …
UNIGENE0003255	ID_1690	12	kinesin-like protein [Cucumis melo subsp. melo]	-	GO:0005622//intracellular;GO:0032991//macromolecular complex;GO:0043232//intracellular non-membrane-bounded organelle;GO:0043234//protein complex;GO:0044422//organelle part;GO:0015630//microtubule cytoskeleton;GO:0005875//microtubule associated complex;GO:0044446//intracellular organelle part;GO:0044430//cytoskeletal part;GO:0044464//cell part;GO:0005856//cytoskeleton;GO:0005623//cell;GO:0043226/…	GO:0016787//hydrolase activity;GO:0003774//motor activity;GO:0005515//protein binding;GO:0032550//purine ribonucleoside binding;GO:0036094//small molecule binding;GO:0017111//nucleoside-triphosphatase activity;GO:0016462//pyrophosphatase activity;GO:1901363//heterocyclic compound binding;GO:0003824//catalytic activity;GO:0001883//purine nucleoside binding;GO:0097159//organic cyclic compound bindi…	GO:0044699//single-organism process;GO:0006725//cellular aromatic compound metabolic process;GO:0009987//cellular process;GO:0044763//single-organism cellular process;GO:0043170//macromolecule metabolic process;GO:0006807//nitrogen compound metabolic process;GO:0006139//nucleobase-containing compound metabolic process;GO:1901360//organic cyclic compound metabolic process;GO:0090304//nucleic acid …
UNIGENE0003257	ID_1691	12	--	-	-	-	-
UNIGENE0003258	ID_1692	4	--	-	-	-	-
UNIGENE0003261	ID_1693	12	PREDICTED: UDP-glycosyltransferase 73C3-like [Cucumis melo]	-	-	GO:0016757//transferase activity, transferring glycosyl groups;GO:0016740//transferase activity;GO:0003824//catalytic activity	-
UNIGENE0003262	ID_1694	16	Secretion protein HlyD family protein [Cucumis sativus]	-	-	-	-
UNIGENE0003267	ID_1695	10	--	-	-	-	-
UNIGENE0003271	ID_1696	9	--	-	-	-	-
UNIGENE0003273	ID_1697	13	PREDICTED: adiponectin receptor protein 2-like isoform X1 [Cucumis melo]	-	GO:0031224//intrinsic component of membrane;GO:0016020//membrane;GO:0044425//membrane part	-	-
UNIGENE0003275	ID_1698	5	--	-	-	-	-
UNIGENE0003276	ID_1699	24	PREDICTED: omega-hydroxypalmitate O-feruloyl transferase [Cucumis melo]	ko00073//Cutin, suberine and wax biosynthesis//Lipid metabolism//Metabolism	-	GO:0050737//O-hydroxycinnamoyltransferase activity;GO:0016747//transferase activity, transferring acyl groups other than amino-acyl groups;GO:0016740//transferase activity;GO:0003824//catalytic activity;GO:0016746//transferase activity, transferring acyl groups;GO:0008374//O-acyltransferase activity;GO:0050734//hydroxycinnamoyltransferase activity	-
UNIGENE0003278	ID_1700	12	--	-	-	-	-
UNIGENE0003281	ID_1701	7	--	-	-	-	-
UNIGENE0003282	ID_1702	11	--	-	-	-	-
UNIGENE0003286	ID_1703	20	--	-	-	-	-
UNIGENE0003288	ID_1704	0	--	-	-	-	-
UNIGENE0003290	ID_1705	12	PREDICTED: LRR receptor-like serine/threonine-protein kinase FEI 2 isoform X1 [Cucumis melo]	-	GO:0044425//membrane part;GO:0031224//intrinsic component of membrane;GO:0016020//membrane	GO:0097159//organic cyclic compound binding;GO:0032549//ribonucleoside binding;GO:0004672//protein kinase activity;GO:0005488//binding;GO:0036094//small molecule binding;GO:0016773//phosphotransferase activity, alcohol group as acceptor;GO:0016772//transferase activity, transferring phosphorus-containing groups;GO:0016301//kinase activity;GO:0097367//carbohydrate derivative binding;GO:0032550//pu…	GO:0044267//cellular protein metabolic process;GO:0032501//multicellular organismal process;GO:0065007//biological regulation;GO:0007275//multicellular organismal development;GO:0006796//phosphate-containing compound metabolic process;GO:0009987//cellular process;GO:0044260//cellular macromolecule metabolic process;GO:0048856//anatomical structure development;GO:0019538//protein metabolic process…
UNIGENE0003292	ID_1706	12	exosome complex exonuclease RRP41 [Medicago truncatula]	-	-	-	-
UNIGENE0003293	ID_1707	12	--	-	-	-	-
UNIGENE0003294	ID_1708	12	PREDICTED: probable LRR receptor-like serine/threonine-protein kinase At1g51810 [Cucumis melo]	-	-	GO:0016772//transferase activity, transferring phosphorus-containing groups;GO:0003824//catalytic activity;GO:1901363//heterocyclic compound binding;GO:0097159//organic cyclic compound binding;GO:0005488//binding;GO:0016301//kinase activity;GO:0036094//small molecule binding;GO:0016740//transferase activity;GO:0016773//phosphotransferase activity, alcohol group as acceptor;GO:0004672//protein kin…	GO:0008152//metabolic process;GO:0044237//cellular metabolic process;GO:0009987//cellular process
UNIGENE0003295	ID_1709	10	PREDICTED: exocyst complex component EXO70A1-like [Cucumis melo]	-	GO:0043234//protein complex;GO:0032991//macromolecular complex	-	GO:0016192//vesicle-mediated transport;GO:0051234//establishment of localization;GO:0006810//transport;GO:0051179//localization
UNIGENE0003296	ID_1710	12	--	-	-	-	-
UNIGENE0003300	ID_1711	24	BnaC06g24790D [Brassica napus]	-	GO:0044424//intracellular part;GO:0043231//intracellular membrane-bounded organelle;GO:0005623//cell;GO:0043227//membrane-bounded organelle;GO:0005622//intracellular;GO:0044464//cell part;GO:0043229//intracellular organelle;GO:0043226//organelle	-	-
UNIGENE0003301	ID_1712	21	PREDICTED: uncharacterized protein LOC103931806, partial [Pyrus x bretschneideri]	-	-	-	-
UNIGENE0003304	ID_1713	4	PREDICTED: BEL1-like homeodomain protein 9 isoform X2 [Cucumis sativus]	-	-	-	GO:2000113//negative regulation of cellular macromolecule biosynthetic process;GO:0050789//regulation of biological process;GO:0010468//regulation of gene expression;GO:0009890//negative regulation of biosynthetic process;GO:0048513//organ development;GO:0016458//gene silencing;GO:0009987//cellular process;GO:0007389//pattern specification process;GO:0048856//anatomical structure development;GO:0…
UNIGENE0003305	ID_1714	2	BEL1-like homeodomain protein 9 [Morus notabilis]	-	GO:0044464//cell part;GO:0043231//intracellular membrane-bounded organelle;GO:0005623//cell;GO:0043226//organelle;GO:0005622//intracellular;GO:0043229//intracellular organelle;GO:0044424//intracellular part;GO:0044444//cytoplasmic part;GO:0005737//cytoplasm;GO:0043227//membrane-bounded organelle	GO:0097159//organic cyclic compound binding;GO:0003676//nucleic acid binding;GO:0003677//DNA binding;GO:0005488//binding;GO:0001071//nucleic acid binding transcription factor activity;GO:1901363//heterocyclic compound binding	GO:0008152//metabolic process;GO:0034641//cellular nitrogen compound metabolic process;GO:0009943//adaxial/abaxial axis specification;GO:0009890//negative regulation of biosynthetic process;GO:0002376//immune system process;GO:0010556//regulation of macromolecule biosynthetic process;GO:0043170//macromolecule metabolic process;GO:0007389//pattern specification process;GO:0006355//regulation of tr…
UNIGENE0003306	ID_1715	10	PREDICTED: zinc finger protein ZAT10-like [Cucumis melo]	-	-	GO:0043169//cation binding;GO:0005488//binding;GO:0097159//organic cyclic compound binding;GO:0043167//ion binding	-
UNIGENE0003308	ID_1716	12	--	-	-	-	-
UNIGENE0003310	ID_1717	23	PREDICTED: 101 kDa malaria antigen-like [Cucumis melo]	-	-	-	-
UNIGENE0003313	ID_1718	12	--	-	-	-	-
UNIGENE0003315	ID_1719	6	--	-	-	-	-
UNIGENE0003316	ID_1720	4	ty3-gypsy retrotransposon protein [Cucumis melo subsp. melo]	-	-	-	GO:0071704//organic substance metabolic process;GO:0046483//heterocycle metabolic process;GO:0044238//primary metabolic process;GO:0006807//nitrogen compound metabolic process;GO:1901360//organic cyclic compound metabolic process;GO:0008152//metabolic process;GO:0043170//macromolecule metabolic process;GO:0044260//cellular macromolecule metabolic process;GO:0044237//cellular metabolic process;GO:…
UNIGENE0003320	ID_1721	10	PREDICTED: protein RER1B [Cucumis sativus]	-	GO:0044425//membrane part;GO:0031224//intrinsic component of membrane;GO:0016020//membrane	-	-
UNIGENE0003322	ID_1722	24	PREDICTED: adiponectin receptor protein [Cucumis melo]	-	GO:0044425//membrane part;GO:0016020//membrane;GO:0031224//intrinsic component of membrane	GO:0060089//molecular transducer activity	-
UNIGENE0003325	ID_1723	10	PREDICTED: clp protease-related protein At4g12060, chloroplastic-like [Cucumis melo]	-	GO:0043229//intracellular organelle;GO:0009526//plastid envelope;GO:0044422//organelle part;GO:0044464//cell part;GO:0009532//plastid stroma;GO:0044444//cytoplasmic part;GO:0043227//membrane-bounded organelle;GO:0005622//intracellular;GO:0031975//envelope;GO:0043231//intracellular membrane-bounded organelle;GO:0005737//cytoplasm;GO:0044424//intracellular part;GO:0043226//organelle;GO:0031967//org…	GO:0003824//catalytic activity;GO:0016787//hydrolase activity	GO:0019538//protein metabolic process;GO:0008152//metabolic process;GO:0043170//macromolecule metabolic process;GO:0071704//organic substance metabolic process;GO:0044238//primary metabolic process
UNIGENE0003327	ID_1724	12	--	-	-	-	-
UNIGENE0003330	ID_1725	9	Nucleoside diphosphate kinase 6 [Morus notabilis]	-	-	-	-
UNIGENE0003332	ID_1726	15	--	-	-	-	-
UNIGENE0003333	ID_1727	20	--	-	-	-	-
UNIGENE0003336	ID_1728	7	PREDICTED: probable xyloglucan glycosyltransferase 6 [Cucumis melo]	-	GO:0044425//membrane part;GO:0031984//organelle subcompartment;GO:0044424//intracellular part;GO:0043229//intracellular organelle;GO:0005623//cell;GO:0031224//intrinsic component of membrane;GO:0005622//intracellular;GO:0043231//intracellular membrane-bounded organelle;GO:0043227//membrane-bounded organelle;GO:0031090//organelle membrane;GO:0044446//intracellular organelle part;GO:0044464//cell p…	GO:0019187//beta-1,4-mannosyltransferase activity;GO:0003824//catalytic activity;GO:0000030//mannosyltransferase activity;GO:0016758//transferase activity, transferring hexosyl groups;GO:0016757//transferase activity, transferring glycosyl groups;GO:0016740//transferase activity	GO:0070085//glycosylation;GO:0090627//plant epidermal cell differentiation;GO:0051273//beta-glucan metabolic process;GO:0044723//single-organism carbohydrate metabolic process;GO:0044262//cellular carbohydrate metabolic process;GO:0044264//cellular polysaccharide metabolic process;GO:0009653//anatomical structure morphogenesis;GO:0044711//single-organism biosynthetic process;GO:0005976//polysacch…
UNIGENE0003342	ID_1729	17	PREDICTED: RING finger and CHY zinc finger domain-containing protein 1 [Cucumis sativus]	ko04120//Ubiquitin mediated proteolysis//Folding, sorting and degradation//Genetic Information Processing	-	GO:0046872//metal ion binding;GO:0043169//cation binding;GO:0043167//ion binding;GO:0005488//binding;GO:0046914//transition metal ion binding	-
UNIGENE0003347	ID_1730	20	PREDICTED: cytokinin riboside 5'-monophosphate phosphoribohydrolase LOG7 [Cucumis sativus]	-	GO:0044424//intracellular part;GO:0043229//intracellular organelle;GO:0005737//cytoplasm;GO:0044464//cell part;GO:0043231//intracellular membrane-bounded organelle;GO:0005622//intracellular;GO:0043226//organelle;GO:0043227//membrane-bounded organelle;GO:0005623//cell;GO:0044444//cytoplasmic part	GO:0016787//hydrolase activity;GO:0003824//catalytic activity;GO:0016798//hydrolase activity, acting on glycosyl bonds	GO:0042594//response to starvation;GO:0033554//cellular response to stress;GO:0044237//cellular metabolic process;GO:0015698//inorganic anion transport;GO:0042221//response to chemical;GO:0009719//response to endogenous stimulus;GO:0031667//response to nutrient levels;GO:0010033//response to organic substance;GO:0046483//heterocycle metabolic process;GO:0071704//organic substance metabolic proces…
UNIGENE0003350	ID_1731	1	--	-	-	-	-
UNIGENE0003351	ID_1732	9	--	-	-	-	-
UNIGENE0003355	ID_1733	12	--	-	-	-	-
UNIGENE0003356	ID_1734	9	--	-	-	-	-
UNIGENE0003357	ID_1735	14	--	-	-	-	-
UNIGENE0003360	ID_1736	11	PREDICTED: myb-related protein 306 [Prunus mume]	-	GO:0044464//cell part;GO:0043226//organelle;GO:0043227//membrane-bounded organelle;GO:0005622//intracellular;GO:0005623//cell;GO:0043231//intracellular membrane-bounded organelle;GO:0043229//intracellular organelle;GO:0044424//intracellular part	GO:0097159//organic cyclic compound binding;GO:0001071//nucleic acid binding transcription factor activity;GO:1901363//heterocyclic compound binding;GO:0005488//binding;GO:0003676//nucleic acid binding	GO:0065007//biological regulation;GO:0008152//metabolic process;GO:0044699//single-organism process;GO:0044710//single-organism metabolic process;GO:0019222//regulation of metabolic process;GO:0071704//organic substance metabolic process;GO:0050789//regulation of biological process;GO:0043436//oxoacid metabolic process;GO:0044281//small molecule metabolic process;GO:0044237//cellular metabolic pr…
UNIGENE0003361	ID_1737	15	PREDICTED: histone H1-like [Cucumis melo]	-	GO:0043228//non-membrane-bounded organelle;GO:0005623//cell;GO:0005622//intracellular;GO:0044424//intracellular part;GO:0044422//organelle part;GO:0032991//macromolecular complex;GO:0043226//organelle;GO:0043232//intracellular non-membrane-bounded organelle;GO:0000785//chromatin;GO:0044427//chromosomal part;GO:0043231//intracellular membrane-bounded organelle;GO:0005694//chromosome;GO:0043229//in…	GO:0097159//organic cyclic compound binding;GO:0005488//binding;GO:0003676//nucleic acid binding;GO:1901363//heterocyclic compound binding	GO:0071824//protein-DNA complex subunit organization;GO:0071840//cellular component organization or biogenesis;GO:0006325//chromatin organization;GO:0034728//nucleosome organization;GO:0006996//organelle organization;GO:0043933//macromolecular complex subunit organization;GO:0051276//chromosome organization;GO:0009987//cellular process;GO:0016043//cellular component organization;GO:0071822//prote…
UNIGENE0003362	ID_1738	15	PREDICTED: histone H1-like [Cucumis melo]	-	GO:0043226//organelle;GO:0044424//intracellular part;GO:0005623//cell;GO:0044464//cell part;GO:0032991//macromolecular complex;GO:0043227//membrane-bounded organelle;GO:0005694//chromosome;GO:0044427//chromosomal part;GO:0043228//non-membrane-bounded organelle;GO:0043232//intracellular non-membrane-bounded organelle;GO:0000785//chromatin;GO:0043231//intracellular membrane-bounded organelle;GO:000…	GO:0097159//organic cyclic compound binding;GO:0005488//binding;GO:0003676//nucleic acid binding;GO:1901363//heterocyclic compound binding	GO:0051276//chromosome organization;GO:0071840//cellular component organization or biogenesis;GO:0016043//cellular component organization;GO:0006996//organelle organization;GO:0006325//chromatin organization;GO:0071822//protein complex subunit organization;GO:0043933//macromolecular complex subunit organization;GO:0071824//protein-DNA complex subunit organization;GO:0034728//nucleosome organizati…
UNIGENE0003363	ID_1739	17	--	-	-	-	-
UNIGENE0003369	ID_1740	1	--	-	-	-	-
UNIGENE0003374	ID_1741	12	--	-	-	-	-
UNIGENE0003378	ID_1742	7	cyst nematode resistance protein-like protein [Oryza sativa Japonica Group]	-	-	-	-
UNIGENE0003380	ID_1743	9	PREDICTED: 66 kDa stress protein [Cucumis sativus]	-	GO:0043234//protein complex;GO:0000151//ubiquitin ligase complex;GO:0032991//macromolecular complex;GO:0005623//cell;GO:0044464//cell part;GO:0031461//cullin-RING ubiquitin ligase complex;GO:0005737//cytoplasm;GO:1902494//catalytic complex;GO:0044444//cytoplasmic part;GO:0044424//intracellular part;GO:1990234//transferase complex;GO:0005622//intracellular	GO:0003824//catalytic activity;GO:0016772//transferase activity, transferring phosphorus-containing groups;GO:0016740//transferase activity	GO:0044262//cellular carbohydrate metabolic process;GO:0006796//phosphate-containing compound metabolic process;GO:0070838//divalent metal ion transport;GO:0009743//response to carbohydrate;GO:0032502//developmental process;GO:0042044//fluid transport;GO:0044238//primary metabolic process;GO:0030154//cell differentiation;GO:0051179//localization;GO:0005976//polysaccharide metabolic process;GO:004…
UNIGENE0003382	ID_1744	10	--	-	-	-	-
UNIGENE0003383	ID_1745	7	--	-	-	-	-
UNIGENE0003385	ID_1746	21	PREDICTED: transmembrane protein 184C isoform X2 [Cucumis sativus]	-	-	-	GO:0006631//fatty acid metabolic process;GO:0006082//organic acid metabolic process;GO:0032787//monocarboxylic acid metabolic process;GO:0044237//cellular metabolic process;GO:0044255//cellular lipid metabolic process;GO:0071704//organic substance metabolic process;GO:0044238//primary metabolic process;GO:0008152//metabolic process;GO:0044710//single-organism metabolic process;GO:0044763//single-…
UNIGENE0003386	ID_1747	12	--	-	-	-	-
UNIGENE0003387	ID_1748	15	--	-	-	-	-
UNIGENE0003388	ID_1749	5	--	-	-	-	-
UNIGENE0003392	ID_1750	17	PREDICTED: 23 kDa jasmonate-induced protein-like [Cucumis melo]	-	-	-	-
UNIGENE0003394	ID_1751	21	23 kDa jasmonate-induced protein [Citrullus lanatus]	-	-	-	-
UNIGENE0003395	ID_1752	11	PREDICTED: L-type lectin-domain containing receptor kinase IX.1-like [Cucumis melo]	-	-	GO:0016740//transferase activity;GO:0032549//ribonucleoside binding;GO:0001882//nucleoside binding;GO:0032550//purine ribonucleoside binding;GO:0003824//catalytic activity;GO:0036094//small molecule binding;GO:1901363//heterocyclic compound binding;GO:0016772//transferase activity, transferring phosphorus-containing groups;GO:0016301//kinase activity;GO:0004672//protein kinase activity;GO:0016773…	GO:0043170//macromolecule metabolic process;GO:0019538//protein metabolic process;GO:0009987//cellular process;GO:0036211//protein modification process;GO:0006464//cellular protein modification process;GO:0006796//phosphate-containing compound metabolic process;GO:0044260//cellular macromolecule metabolic process;GO:0071704//organic substance metabolic process;GO:0044237//cellular metabolic proce…
UNIGENE0003396	ID_1753	11	--	-	-	-	-
UNIGENE0003398	ID_1754	18	PREDICTED: probable beta-1,4-xylosyltransferase IRX14 [Cucumis melo]	-	GO:0031984//organelle subcompartment;GO:0031224//intrinsic component of membrane;GO:0043229//intracellular organelle;GO:0005623//cell;GO:0044446//intracellular organelle part;GO:0043231//intracellular membrane-bounded organelle;GO:0043227//membrane-bounded organelle;GO:0043226//organelle;GO:0016020//membrane;GO:0044422//organelle part;GO:0044424//intracellular part;GO:0031090//organelle membrane;…	GO:0016740//transferase activity;GO:0003824//catalytic activity;GO:0008194//UDP-glycosyltransferase activity;GO:0015020//glucuronosyltransferase activity;GO:0016757//transferase activity, transferring glycosyl groups;GO:0016763//transferase activity, transferring pentosyl groups;GO:0016758//transferase activity, transferring hexosyl groups	GO:0044260//cellular macromolecule metabolic process;GO:0007010//cytoskeleton organization;GO:0048869//cellular developmental process;GO:0048731//system development;GO:0048513//organ development;GO:0044237//cellular metabolic process;GO:0022622//root system development;GO:0032502//developmental process;GO:0044699//single-organism process;GO:0032501//multicellular organismal process;GO:0048608//re…
UNIGENE0003399	ID_1755	12	--	-	-	-	-
UNIGENE0003401	ID_1756	15	--	-	-	-	-
UNIGENE0003402	ID_1757	14	--	-	-	-	-
UNIGENE0003404	ID_1758	5	PREDICTED: carbon catabolite repressor protein 4 homolog 6 isoform X2 [Cucumis sativus]	-	-	-	-
UNIGENE0003406	ID_1759	9	Auxin efflux carrier component [Theobroma cacao]	-	GO:0043226//organelle;GO:0043231//intracellular membrane-bounded organelle;GO:0043227//membrane-bounded organelle;GO:0044425//membrane part;GO:0016020//membrane;GO:0005622//intracellular;GO:0031224//intrinsic component of membrane;GO:0044464//cell part;GO:0005623//cell;GO:0043229//intracellular organelle;GO:0044424//intracellular part	GO:0022857//transmembrane transporter activity;GO:0005215//transporter activity;GO:0022892//substrate-specific transporter activity;GO:0022891//substrate-specific transmembrane transporter activity	GO:0009914//hormone transport;GO:0065007//biological regulation;GO:0009755//hormone-mediated signaling pathway;GO:0044707//single-multicellular organism process;GO:0050789//regulation of biological process;GO:0007275//multicellular organismal development;GO:0044765//single-organism transport;GO:0044767//single-organism developmental process;GO:0023052//signaling;GO:0048229//gametophyte developmen…
UNIGENE0003411	ID_1760	1	conserved hypothetical protein [Ricinus communis]	-	-	-	-
UNIGENE0003412	ID_1761	12	--	-	-	-	-
UNIGENE0003413	ID_1762	8	PREDICTED: RING-H2 finger protein ATL3-like [Cucumis melo]	-	-	GO:0046872//metal ion binding;GO:0005488//binding;GO:0043169//cation binding;GO:0043167//ion binding;GO:0046914//transition metal ion binding	-
UNIGENE0003414	ID_1763	21	PREDICTED: F-box protein SKIP2 [Cucumis melo]	-	-	-	-
UNIGENE0003415	ID_1764	21	PREDICTED: transcription factor PAR2 [Prunus mume]	-	-	-	-
UNIGENE0003423	ID_1765	6	--	-	-	-	-
UNIGENE0003424	ID_1766	12	--	-	-	-	-
UNIGENE0003425	ID_1767	10	--	-	-	-	-
UNIGENE0003427	ID_1768	4	PREDICTED: LRR receptor-like serine/threonine-protein kinase GSO1-like [Citrus sinensis]	-	-	GO:0097159//organic cyclic compound binding;GO:0005488//binding	-
UNIGENE0003428	ID_1769	1	PREDICTED: probable LRR receptor-like serine/threonine-protein kinase At3g47570-like [Citrus sinensis]	-	-	GO:0005488//binding;GO:0097159//organic cyclic compound binding;GO:0046872//metal ion binding;GO:0043167//ion binding;GO:0046914//transition metal ion binding;GO:0043169//cation binding	GO:0046483//heterocycle metabolic process;GO:0044238//primary metabolic process;GO:0006139//nucleobase-containing compound metabolic process;GO:0008152//metabolic process;GO:0034641//cellular nitrogen compound metabolic process;GO:0044260//cellular macromolecule metabolic process;GO:0006259//DNA metabolic process;GO:0006725//cellular aromatic compound metabolic process;GO:0009987//cellular proces…
UNIGENE0003429	ID_1770	21	PREDICTED: uncharacterized protein LOC105435174 [Cucumis sativus]	-	-	-	-
UNIGENE0003432	ID_1771	22	PREDICTED: pinin [Cucumis melo]	-	-	-	GO:0044763//single-organism cellular process;GO:0050896//response to stimulus;GO:0009987//cellular process;GO:0044699//single-organism process
UNIGENE0003433	ID_1772	14	--	-	-	-	-
UNIGENE0003435	ID_1773	1	--	-	-	-	-
UNIGENE0003436	ID_1774	5	PREDICTED: probable receptor protein kinase TMK1 [Cucumis sativus]	-	GO:0016020//membrane;GO:0031224//intrinsic component of membrane;GO:0044425//membrane part	GO:0016773//phosphotransferase activity, alcohol group as acceptor;GO:0097367//carbohydrate derivative binding;GO:0016772//transferase activity, transferring phosphorus-containing groups;GO:0016301//kinase activity;GO:0097159//organic cyclic compound binding;GO:0004672//protein kinase activity;GO:0032549//ribonucleoside binding;GO:0016740//transferase activity;GO:1901363//heterocyclic compound bi…	GO:0043170//macromolecule metabolic process;GO:0009987//cellular process;GO:0043412//macromolecule modification;GO:0019538//protein metabolic process;GO:0044260//cellular macromolecule metabolic process;GO:0008152//metabolic process;GO:0006793//phosphorus metabolic process;GO:0036211//protein modification process;GO:0071704//organic substance metabolic process;GO:0006796//phosphate-containing com…
UNIGENE0003438	ID_1775	2	PREDICTED: probable receptor protein kinase TMK1 [Cucumis sativus]	-	GO:0005622//intracellular;GO:0044424//intracellular part;GO:0043229//intracellular organelle;GO:0030054//cell junction;GO:0031224//intrinsic component of membrane;GO:0005911//cell-cell junction;GO:0043231//intracellular membrane-bounded organelle;GO:0005623//cell;GO:0044464//cell part;GO:0044425//membrane part;GO:0043227//membrane-bounded organelle;GO:0043226//organelle;GO:0016020//membrane	GO:0001882//nucleoside binding;GO:0036094//small molecule binding;GO:0016772//transferase activity, transferring phosphorus-containing groups;GO:0032550//purine ribonucleoside binding;GO:0097367//carbohydrate derivative binding;GO:0003824//catalytic activity;GO:0001883//purine nucleoside binding;GO:0016773//phosphotransferase activity, alcohol group as acceptor;GO:0032549//ribonucleoside binding;…	GO:0044238//primary metabolic process;GO:0043170//macromolecule metabolic process;GO:0019538//protein metabolic process;GO:0006464//cellular protein modification process;GO:0071704//organic substance metabolic process;GO:0009987//cellular process;GO:0044267//cellular protein metabolic process;GO:0006796//phosphate-containing compound metabolic process;GO:0008152//metabolic process;GO:0036211//pro…
UNIGENE0003439	ID_1776	12	PREDICTED: pentatricopeptide repeat-containing protein At1g63330-like [Pyrus x bretschneideri]	-	-	-	-
UNIGENE0003441	ID_1777	10	PREDICTED: protein RALF-like 33 [Jatropha curcas]	-	-	-	GO:0044699//single-organism process;GO:0071704//organic substance metabolic process;GO:0044763//single-organism cellular process;GO:0008152//metabolic process;GO:0009987//cellular process;GO:0044237//cellular metabolic process
UNIGENE0003444	ID_1778	6	--	-	-	-	-
UNIGENE0003445	ID_1779	9	--	-	-	-	-
UNIGENE0003448	ID_1780	5	--	-	-	-	-
UNIGENE0003450	ID_1781	7	--	-	-	-	-
UNIGENE0003455	ID_1782	7	Strong similarity to Zea mays retrotransposon Hopscotch polyprotein (gb|U12626) [Arabidopsis thaliana]	-	-	GO:0043167//ion binding;GO:0043169//cation binding;GO:0046914//transition metal ion binding;GO:0046872//metal ion binding;GO:0005488//binding;GO:0097159//organic cyclic compound binding	GO:0044237//cellular metabolic process;GO:0044260//cellular macromolecule metabolic process;GO:0046483//heterocycle metabolic process;GO:0006807//nitrogen compound metabolic process;GO:0071704//organic substance metabolic process;GO:0009987//cellular process;GO:1901360//organic cyclic compound metabolic process;GO:0006259//DNA metabolic process;GO:0008152//metabolic process;GO:0034641//cellular n…
UNIGENE0003459	ID_1783	20	--	-	-	-	-
UNIGENE0003460	ID_1784	11	--	-	-	-	-
UNIGENE0003461	ID_1785	12	--	-	-	-	-
UNIGENE0003464	ID_1786	16	PREDICTED: 40S ribosomal protein S20-2 [Cucumis melo]	ko03010//Ribosome//Translation//Genetic Information Processing	GO:0044422//organelle part;GO:0005622//intracellular;GO:0044424//intracellular part;GO:0043232//intracellular non-membrane-bounded organelle;GO:0005623//cell;GO:0043229//intracellular organelle;GO:0044464//cell part;GO:0005840//ribosome;GO:0032991//macromolecular complex;GO:0044446//intracellular organelle part;GO:0044391//ribosomal subunit;GO:0030529//ribonucleoprotein complex;GO:0043228//non-me…	GO:1901363//heterocyclic compound binding;GO:0003676//nucleic acid binding;GO:0005488//binding;GO:0097159//organic cyclic compound binding;GO:0005198//structural molecule activity	GO:0043170//macromolecule metabolic process;GO:0008152//metabolic process;GO:0010467//gene expression;GO:0071704//organic substance metabolic process
UNIGENE0003466	ID_1787	10	--	-	-	-	-
UNIGENE0003467	ID_1788	21	PREDICTED: ring canal kelch homolog isoform X1 [Cucumis melo]	-	-	-	-
UNIGENE0003468	ID_1789	21	PREDICTED: ring canal kelch homolog isoform X1 [Cucumis melo]	-	-	-	-
UNIGENE0003475	ID_1790	12	--	-	-	-	-
UNIGENE0003476	ID_1791	12	--	-	-	-	-
UNIGENE0003477	ID_1792	10	PREDICTED: transmembrane protein 45A [Amborella trichopoda]	-	-	-	-
UNIGENE0003479	ID_1793	11	PREDICTED: subtilisin-like protease SBT1.6 [Cucumis sativus]	-	-	GO:0008233//peptidase activity;GO:0004175//endopeptidase activity;GO:0003824//catalytic activity;GO:0016787//hydrolase activity;GO:0070011//peptidase activity, acting on L-amino acid peptides	GO:0019538//protein metabolic process;GO:0071704//organic substance metabolic process;GO:0008152//metabolic process;GO:0043170//macromolecule metabolic process;GO:0044238//primary metabolic process
UNIGENE0003480	ID_1794	12	PREDICTED: TPR and ankyrin repeat-containing protein 1-like [Malus domestica]	-	-	-	-
UNIGENE0003481	ID_1795	12	--	-	-	-	-
UNIGENE0003482	ID_1796	15	PREDICTED: ethylene-responsive transcription factor RAP2-1 [Cucumis melo]	-	GO:0044464//cell part;GO:0005623//cell;GO:0044424//intracellular part;GO:0043229//intracellular organelle;GO:0005622//intracellular;GO:0043231//intracellular membrane-bounded organelle;GO:0043227//membrane-bounded organelle;GO:0043226//organelle	GO:0097159//organic cyclic compound binding;GO:0005488//binding;GO:0001071//nucleic acid binding transcription factor activity;GO:0003676//nucleic acid binding;GO:1901363//heterocyclic compound binding	GO:0009889//regulation of biosynthetic process;GO:0019222//regulation of metabolic process;GO:2001141//regulation of RNA biosynthetic process;GO:0080090//regulation of primary metabolic process;GO:0006355//regulation of transcription, DNA-templated;GO:0019219//regulation of nucleobase-containing compound metabolic process;GO:1903506//regulation of nucleic acid-templated transcription;GO:2000112//…
UNIGENE0003485	ID_1797	19	PREDICTED: angio-associated migratory cell protein isoform X1 [Cucumis melo]	-	-	-	-
UNIGENE0003489	ID_1798	4	--	-	-	-	-
UNIGENE0003491	ID_1799	3	PREDICTED: protein FANTASTIC FOUR 3 [Cucumis sativus]	-	-	-	-
UNIGENE0003492	ID_1800	3	PREDICTED: auxin-responsive protein IAA14-like [Cucumis melo]	ko04075//Plant hormone signal transduction//Signal transduction//Environmental Information Processing	GO:0044464//cell part;GO:0043231//intracellular membrane-bounded organelle;GO:0005623//cell;GO:0043229//intracellular organelle;GO:0043226//organelle;GO:0005622//intracellular;GO:0043227//membrane-bounded organelle;GO:0044424//intracellular part	GO:0005515//protein binding;GO:0005488//binding	GO:0007165//signal transduction;GO:0050789//regulation of biological process;GO:0009719//response to endogenous stimulus;GO:0032870//cellular response to hormone stimulus;GO:0044763//single-organism cellular process;GO:0044260//cellular macromolecule metabolic process;GO:0009058//biosynthetic process;GO:0009059//macromolecule biosynthetic process;GO:0043170//macromolecule metabolic process;GO:003…
UNIGENE0003493	ID_1801	9	--	-	-	-	-
UNIGENE0003495	ID_1802	1	U-box domain-containing protein 13 [Morus notabilis]	-	-	-	-
UNIGENE0003502	ID_1803	14	PREDICTED: protein trichome birefringence-like 43 [Cucumis sativus]	-	-	-	-
UNIGENE0003503	ID_1804	16	PREDICTED: probable protein disulfide-isomerase A6 [Cucumis sativus]	ko04141//Protein processing in endoplasmic reticulum//Folding, sorting and degradation//Genetic Information Processing	GO:0031090//organelle membrane;GO:0005623//cell;GO:0030312//external encapsulating structure;GO:0043229//intracellular organelle;GO:0043226//organelle;GO:0071944//cell periphery;GO:0043227//membrane-bounded organelle;GO:0044424//intracellular part;GO:0044464//cell part;GO:0005622//intracellular;GO:0044422//organelle part;GO:0016020//membrane;GO:0043231//intracellular membrane-bounded organelle;GO…	GO:0016491//oxidoreductase activity;GO:0016864//intramolecular oxidoreductase activity, transposing S-S bonds;GO:0015036//disulfide oxidoreductase activity;GO:0003824//catalytic activity;GO:0016667//oxidoreductase activity, acting on a sulfur group of donors;GO:0016853//isomerase activity;GO:0016860//intramolecular oxidoreductase activity	GO:0098542//defense response to other organism;GO:0006955//immune response;GO:0032502//developmental process;GO:0051704//multi-organism process;GO:0006006//glucose metabolic process;GO:0006950//response to stress;GO:0044763//single-organism cellular process;GO:0006090//pyruvate metabolic process;GO:0009605//response to external stimulus;GO:0009814//defense response, incompatible interaction;GO:00…
UNIGENE0003505	ID_1805	14	--	-	-	-	-
UNIGENE0003507	ID_1806	15	nucleotide binding protein [Cucumis melo subsp. melo]	-	-	-	-
UNIGENE0003508	ID_1807	19	PREDICTED: zinc finger protein 5 [Cucumis melo]	-	-	-	GO:0065007//biological regulation;GO:0009987//cellular process;GO:0044699//single-organism process;GO:0050789//regulation of biological process
UNIGENE0003510	ID_1808	7	PREDICTED: retrovirus-related Pol polyprotein from transposon TNT 1-94 isoform X3 [Cucumis melo]	-	-	-	-
UNIGENE0003511	ID_1809	12	--	-	-	-	-
UNIGENE0003513	ID_1810	25	PREDICTED: ctenidin-3-like [Cucumis sativus]	-	-	-	-
UNIGENE0003514	ID_1811	5	--	-	-	-	-
UNIGENE0003515	ID_1812	0	PREDICTED: heavy metal-associated isoprenylated plant protein 26 [Cucumis melo]	-	-	GO:0043167//ion binding;GO:0043169//cation binding;GO:0005488//binding	GO:0006811//ion transport;GO:0051234//establishment of localization;GO:0006812//cation transport;GO:1902578//single-organism localization;GO:0044699//single-organism process;GO:0051179//localization;GO:0006810//transport;GO:0044765//single-organism transport
UNIGENE0003516	ID_1813	18	PREDICTED: reticulon-like protein B1 [Cucumis sativus]	-	GO:0043229//intracellular organelle;GO:0043227//membrane-bounded organelle;GO:0043231//intracellular membrane-bounded organelle;GO:0044425//membrane part;GO:0031090//organelle membrane;GO:0043226//organelle;GO:0005622//intracellular;GO:0031224//intrinsic component of membrane;GO:0044422//organelle part;GO:0005623//cell;GO:0044464//cell part;GO:0044424//intracellular part;GO:0016020//membrane	-	-
UNIGENE0003520	ID_1814	6	protein-O-fucosyltransferase 2 [Glycine max]	ko00514//Other types of O-glycan biosynthesis//Glycan biosynthesis and metabolism//Metabolism	-	GO:0016740//transferase activity;GO:0003824//catalytic activity	-
UNIGENE0003523	ID_1815	12	--	-	-	-	-
UNIGENE0003526	ID_1816	15	PREDICTED: expansin-like A1 [Cucumis sativus]	-	-	-	-
UNIGENE0003531	ID_1817	15	Hop-interacting protein THI031 [Solanum lycopersicum]	-	GO:0005623//cell;GO:0044424//intracellular part;GO:0044464//cell part;GO:0005622//intracellular	-	-
UNIGENE0003532	ID_1818	11	PREDICTED: histone acetyltransferase HAC1-like [Malus domestica]	-	-	-	-
UNIGENE0003533	ID_1819	21	--	-	-	-	-
UNIGENE0003535	ID_1820	3	--	-	-	-	-
UNIGENE0003538	ID_1821	12	--	-	-	-	-
UNIGENE0003540	ID_1822	1	PREDICTED: RNA polymerase-associated protein CTR9 homolog [Cucumis melo]	-	-	-	GO:2000026//regulation of multicellular organismal development;GO:0044238//primary metabolic process;GO:0010629//negative regulation of gene expression;GO:0060255//regulation of macromolecule metabolic process;GO:0014070//response to organic cyclic compound;GO:1903506//regulation of nucleic acid-templated transcription;GO:0009416//response to light stimulus;GO:0051172//negative regulation of nitr…
UNIGENE0003543	ID_1823	9	YTH domain family protein 2 [Glycine soja]	-	-	-	-
UNIGENE0003545	ID_1824	21	PREDICTED: cation/H(+) antiporter 15-like [Cucumis melo]	-	GO:0016020//membrane;GO:0031224//intrinsic component of membrane;GO:0044425//membrane part	GO:0005215//transporter activity;GO:0022804//active transmembrane transporter activity;GO:0015297//antiporter activity;GO:0022892//substrate-specific transporter activity;GO:0015299//solute:proton antiporter activity;GO:0015075//ion transmembrane transporter activity;GO:0022891//substrate-specific transmembrane transporter activity;GO:0015291//secondary active transmembrane transporter activity;G…	GO:0015672//monovalent inorganic cation transport;GO:0030001//metal ion transport;GO:0051179//localization;GO:0015992//proton transport;GO:0071840//cellular component organization or biogenesis;GO:0006812//cation transport;GO:0044699//single-organism process;GO:0009987//cellular process;GO:0016043//cellular component organization;GO:0051234//establishment of localization;GO:0006818//hydrogen tran…
UNIGENE0003546	ID_1825	12	--	-	-	-	-
UNIGENE0003549	ID_1826	21	PREDICTED: nudix hydrolase 1-like [Cucumis sativus]	-	GO:0044444//cytoplasmic part;GO:0044424//intracellular part;GO:0005623//cell;GO:0005737//cytoplasm;GO:0005622//intracellular;GO:0044464//cell part	GO:0016818//hydrolase activity, acting on acid anhydrides, in phosphorus-containing anhydrides;GO:0043167//ion binding;GO:0004551//nucleotide diphosphatase activity;GO:0016787//hydrolase activity;GO:0005488//binding;GO:0043169//cation binding;GO:0047429//nucleoside-triphosphate diphosphatase activity;GO:0003824//catalytic activity;GO:0016462//pyrophosphatase activity;GO:0016817//hydrolase activit…	GO:0050896//response to stimulus;GO:0006950//response to stress;GO:0009987//cellular process;GO:0051716//cellular response to stimulus;GO:0033554//cellular response to stress
UNIGENE0003550	ID_1827	20	--	-	-	-	-
UNIGENE0003553	ID_1828	13	PREDICTED: protein E6 [Cucumis melo]	-	-	-	-
UNIGENE0003554	ID_1829	12	PREDICTED: thylakoidal processing peptidase 1, chloroplastic-like [Cucumis melo]	ko03060//Protein export//Folding, sorting and degradation//Genetic Information Processing	GO:0031224//intrinsic component of membrane;GO:0016020//membrane;GO:0044425//membrane part	GO:0008233//peptidase activity;GO:0016787//hydrolase activity;GO:0003824//catalytic activity;GO:0070011//peptidase activity, acting on L-amino acid peptides	GO:0008152//metabolic process;GO:0019538//protein metabolic process;GO:0043170//macromolecule metabolic process;GO:0071704//organic substance metabolic process;GO:0044238//primary metabolic process
UNIGENE0003557	ID_1830	1	PREDICTED: fructose-bisphosphate aldolase cytoplasmic isozyme isoform X2 [Cucumis melo]	ko01200//Carbon metabolism//Global and Overview//Metabolism;ko01230//Biosynthesis of amino acids//Global and Overview//Metabolism;ko00010//Glycolysis / Gluconeogenesis//Carbohydrate metabolism//Metabolism;ko00710//Carbon fixation in photosynthetic organisms//Energy metabolism//Metabolism;ko00051//Fructose and mannose metabolism//Carbohydrate metabolism//Metabolism;ko00030//Pentose phosphate pathw…	-	GO:0016832//aldehyde-lyase activity;GO:0016829//lyase activity;GO:0003824//catalytic activity;GO:0016830//carbon-carbon lyase activity	GO:0044763//single-organism cellular process;GO:0009987//cellular process;GO:0044710//single-organism metabolic process;GO:0071704//organic substance metabolic process;GO:0019752//carboxylic acid metabolic process;GO:0006090//pyruvate metabolic process;GO:0044281//small molecule metabolic process;GO:0008152//metabolic process;GO:0043436//oxoacid metabolic process;GO:0044237//cellular metabolic pr…
UNIGENE0003561	ID_1831	0	BnaC02g31520D [Brassica napus]	-	-	-	-
UNIGENE0003562	ID_1832	13	BnaC02g31520D [Brassica napus]	-	-	-	-
UNIGENE0003563	ID_1833	2	BnaC02g31520D [Brassica napus]	-	-	-	-
UNIGENE0003565	ID_1834	18	PREDICTED: caffeoylshikimate esterase [Cucumis melo]	-	GO:0043227//membrane-bounded organelle;GO:0044464//cell part;GO:0005623//cell;GO:0043229//intracellular organelle;GO:0043226//organelle;GO:0044424//intracellular part;GO:0043231//intracellular membrane-bounded organelle;GO:0005622//intracellular	GO:0003824//catalytic activity;GO:0016298//lipase activity;GO:0016787//hydrolase activity;GO:0016788//hydrolase activity, acting on ester bonds	-
UNIGENE0003567	ID_1835	6	PREDICTED: caffeoylshikimate esterase [Cucumis melo]	-	GO:0043229//intracellular organelle;GO:0005623//cell;GO:0005622//intracellular;GO:0044424//intracellular part;GO:0043231//intracellular membrane-bounded organelle;GO:0043226//organelle;GO:0043227//membrane-bounded organelle;GO:0044464//cell part	GO:0016787//hydrolase activity;GO:0003824//catalytic activity;GO:0016298//lipase activity;GO:0016788//hydrolase activity, acting on ester bonds	-
UNIGENE0003576	ID_1836	6	quinone oxidoreductase-like protein At1g23740, chloroplastic-like [Cucumis sativus]	-	-	GO:0016655//oxidoreductase activity, acting on NAD(P)H, quinone or similar compound as acceptor;GO:0005488//binding;GO:0016491//oxidoreductase activity;GO:0046914//transition metal ion binding;GO:0046872//metal ion binding;GO:0043169//cation binding;GO:0043167//ion binding;GO:0016651//oxidoreductase activity, acting on NAD(P)H;GO:0003824//catalytic activity	GO:0044699//single-organism process;GO:0044710//single-organism metabolic process;GO:0008152//metabolic process
UNIGENE0003577	ID_1837	12	--	-	-	-	-
UNIGENE0003580	ID_1838	4	--	-	-	-	-
UNIGENE0003581	ID_1839	2	hypothetical protein Csa_4G572310 [Cucumis sativus]	-	-	-	-
UNIGENE0003583	ID_1840	12	PREDICTED: protein FAR1-RELATED SEQUENCE 9 [Cucumis sativus]	-	GO:0043231//intracellular membrane-bounded organelle;GO:0043227//membrane-bounded organelle;GO:0044464//cell part;GO:0043226//organelle;GO:0044424//intracellular part;GO:0005622//intracellular;GO:0043229//intracellular organelle;GO:0005623//cell	GO:0046914//transition metal ion binding;GO:0043169//cation binding;GO:0046872//metal ion binding;GO:0043167//ion binding;GO:0005488//binding	-
UNIGENE0003585	ID_1841	13	fiber protein Fb34 [Gossypium barbadense]	-	-	-	GO:0009987//cellular process;GO:0005975//carbohydrate metabolic process;GO:0008152//metabolic process;GO:0044238//primary metabolic process;GO:0044260//cellular macromolecule metabolic process;GO:0071704//organic substance metabolic process;GO:0071554//cell wall organization or biogenesis;GO:0043170//macromolecule metabolic process;GO:0045491//xylan metabolic process;GO:0044036//cell wall macromo…
UNIGENE0003589	ID_1842	10	ethylene responsive transcription factor 1a [Citrullus lanatus subsp. vulgaris]	-	GO:0043227//membrane-bounded organelle;GO:0044424//intracellular part;GO:0043229//intracellular organelle;GO:0005623//cell;GO:0044464//cell part;GO:0005622//intracellular;GO:0043226//organelle;GO:0043231//intracellular membrane-bounded organelle	GO:0001071//nucleic acid binding transcription factor activity;GO:0003676//nucleic acid binding;GO:0097159//organic cyclic compound binding;GO:0005488//binding;GO:1901363//heterocyclic compound binding	GO:0009987//cellular process;GO:0065007//biological regulation;GO:0044237//cellular metabolic process;GO:0034645//cellular macromolecule biosynthetic process;GO:0019222//regulation of metabolic process;GO:0008152//metabolic process;GO:0050789//regulation of biological process;GO:0044260//cellular macromolecule metabolic process;GO:0044249//cellular biosynthetic process;GO:0009058//biosynthetic pr…
UNIGENE0003591	ID_1843	9	Potassium voltage-gated channel subfamily C member 4 [Gossypium arboreum]	-	-	-	-
UNIGENE0003594	ID_1844	7	PREDICTED: ras guanine nucleotide exchange factor K-like [Glycine max]	-	-	-	-
UNIGENE0003595	ID_1845	24	PREDICTED: ras guanine nucleotide exchange factor K-like [Glycine max]	-	-	-	-
UNIGENE0003596	ID_1846	8	PREDICTED: DNA-directed primase/polymerase protein [Cucumis melo]	-	-	GO:0003824//catalytic activity;GO:0016740//transferase activity;GO:0016772//transferase activity, transferring phosphorus-containing groups;GO:0016779//nucleotidyltransferase activity;GO:0003899//DNA-directed RNA polymerase activity;GO:0034062//RNA polymerase activity	GO:0044237//cellular metabolic process;GO:0044260//cellular macromolecule metabolic process;GO:0034641//cellular nitrogen compound metabolic process;GO:0071704//organic substance metabolic process;GO:0044238//primary metabolic process;GO:1901360//organic cyclic compound metabolic process;GO:0043170//macromolecule metabolic process;GO:0009987//cellular process;GO:0046483//heterocycle metabolic pro…
UNIGENE0003597	ID_1847	7	--	-	-	-	-
UNIGENE0003599	ID_1848	25	hypothetical protein POPTR_0016s05280g [Populus trichocarpa]	-	-	-	-
UNIGENE0003601	ID_1849	13	SsrA-binding [Gossypium arboreum]	-	-	-	-
UNIGENE0003603	ID_1850	2	PREDICTED: pentatricopeptide repeat-containing protein At5g13770, chloroplastic [Cucumis melo]	-	GO:0005737//cytoplasm;GO:0043226//organelle;GO:0005622//intracellular;GO:0043227//membrane-bounded organelle;GO:0044444//cytoplasmic part;GO:0044464//cell part;GO:0009536//plastid;GO:0043231//intracellular membrane-bounded organelle;GO:0044424//intracellular part;GO:0043229//intracellular organelle;GO:0005623//cell	-	-
UNIGENE0003605	ID_1851	17	PREDICTED: dnaJ protein homolog 1 [Cucumis sativus]	-	-	GO:0005488//binding;GO:0005515//protein binding	GO:0008152//metabolic process;GO:0044267//cellular protein metabolic process;GO:0019538//protein metabolic process;GO:0071704//organic substance metabolic process;GO:0009987//cellular process;GO:0044260//cellular macromolecule metabolic process;GO:0044238//primary metabolic process;GO:0044237//cellular metabolic process;GO:0043170//macromolecule metabolic process
UNIGENE0003607	ID_1852	9	--	-	-	-	-
UNIGENE0003608	ID_1853	10	PREDICTED: shaggy-related protein kinase theta [Cucumis melo]	-	GO:0044424//intracellular part;GO:0005737//cytoplasm;GO:0043227//membrane-bounded organelle;GO:0043226//organelle;GO:0005623//cell;GO:0005622//intracellular;GO:0044464//cell part;GO:0044444//cytoplasmic part;GO:0043231//intracellular membrane-bounded organelle;GO:0043229//intracellular organelle	GO:0016301//kinase activity;GO:0036094//small molecule binding;GO:0016772//transferase activity, transferring phosphorus-containing groups;GO:0032550//purine ribonucleoside binding;GO:0001883//purine nucleoside binding;GO:0032549//ribonucleoside binding;GO:0001882//nucleoside binding;GO:0016740//transferase activity;GO:0005488//binding;GO:0097159//organic cyclic compound binding;GO:0003824//catal…	GO:0043412//macromolecule modification;GO:0019538//protein metabolic process;GO:0009987//cellular process;GO:0006793//phosphorus metabolic process;GO:0009725//response to hormone;GO:0044237//cellular metabolic process;GO:0010033//response to organic substance;GO:0006464//cellular protein modification process;GO:0044238//primary metabolic process;GO:0006796//phosphate-containing compound metabolic…
UNIGENE0003611	ID_1854	12	--	-	-	-	-
UNIGENE0003617	ID_1855	17	BnaC01g38850D [Brassica napus]	-	-	-	-
UNIGENE0003620	ID_1856	12	--	-	-	-	-
UNIGENE0003621	ID_1857	13	PREDICTED: LOW QUALITY PROTEIN: uncharacterized protein LOC103499536 [Cucumis melo]	-	-	-	-
UNIGENE0003624	ID_1858	25	PREDICTED: miraculin-like isoform X2 [Cucumis melo]	-	-	GO:0098772//molecular function regulator;GO:0061135//endopeptidase regulator activity;GO:0061134//peptidase regulator activity;GO:0030234//enzyme regulator activity	GO:0032269//negative regulation of cellular protein metabolic process;GO:0051246//regulation of protein metabolic process;GO:0080090//regulation of primary metabolic process;GO:0051248//negative regulation of protein metabolic process;GO:0065009//regulation of molecular function;GO:0050794//regulation of cellular process;GO:0050789//regulation of biological process;GO:0051346//negative regulation…
UNIGENE0003626	ID_1859	7	--	-	-	-	-
UNIGENE0003627	ID_1860	5	PREDICTED: probable polygalacturonase [Cucumis melo]	-	-	GO:0003824//catalytic activity;GO:0016798//hydrolase activity, acting on glycosyl bonds;GO:0016787//hydrolase activity;GO:0004553//hydrolase activity, hydrolyzing O-glycosyl compounds	GO:0044238//primary metabolic process;GO:0045229//external encapsulating structure organization;GO:0016043//cellular component organization;GO:0071840//cellular component organization or biogenesis;GO:0009987//cellular process;GO:0008152//metabolic process
[truncated: 25,440 more rows]
